# Supplementary material for: PAD4 deletion in synovial macrophages exacerbates pathology in inflammatory arthritis
Source: Research Square preprint supplement (doi:10.21203/rs.3.rs-9653857/v1), 2026-06-11
Supplement: Supplementary file 1 [file 10052210441a76bcad402bea.xlsx]

## Sheet: MAC1
Row.names	Gene_Symbol	Pad4Flox_LyzMCre_MAC1_1	Pad4Flox_LyzMCre_MAC1_2	Pad4Flox_LyzMCre_MAC1_3	Pad4_ko_MAC1_1	Pad4_ko_MAC1_2	Pad4_ko_MAC1_3	Pad4_ko_MAC1_4	baseMean	log2FoldChange	lfcSE	stat	pvalue	padj
ENSMUSG00000000001	Gnai3	662.768	197.47	197.47	1271.04	957.944	969.922	1051.56	758.31	-1.45026	0.389421	-3.72413	0.000195988	0.00122304
ENSMUSG00000000031	H19	25.799	6.9901	6.9901	0	16.2244	18.6523	12.9634	12.517	0.101579	0.689212	0.147384	0.882829	0.920076
ENSMUSG00000000056	Narf	115.651	47.1832	47.1832	188.515	139.671	157.426	95.3189	112.993	-0.938839	0.395917	-2.3713	0.0177255	0.0456079
ENSMUSG00000000058	Cav2	775.75	214.945	214.945	1094.87	1194.96	1045.28	1269.65	830.057	-1.37651	0.399441	-3.4461	0.000568738	0.00293938
ENSMUSG00000000078	Klf6	2973.12	4260.46	4260.46	4165.45	3956.63	3963.25	3875.29	3922.09	-0.0587052	0.168548	-0.348301	0.727614	0.805942
ENSMUSG00000000085	Scmh1	84.5141	96.1138	96.1138	107.841	50.7894	68.6406	58.7164	80.3898	0.343587	0.338356	1.01546	0.309886	0.427297
ENSMUSG00000000088	Cox5a	528.435	1266.96	1266.96	466.761	620.759	567.777	664.945	768.941	0.771568	0.308224	2.50327	0.0123051	0.0345901
ENSMUSG00000000127	Fer	114.761	207.955	207.955	144.062	102.284	107.437	93.0313	139.641	0.621453	0.305061	2.03715	0.0416354	0.0900754
ENSMUSG00000000131	Xpo6	523.098	424.648	424.648	618.232	565.737	517.043	535.311	515.531	-0.279643	0.163703	-1.70824	0.0875919	0.161145
ENSMUSG00000000134	Tfe3	585.371	241.158	241.158	658.569	615.116	603.59	603.941	506.986	-0.749945	0.319528	-2.34704	0.0189231	0.0480235
ENSMUSG00000000148	Brat1	73.8386	96.1138	96.1138	70.7962	71.9516	59.6875	69.3922	76.842	0.357571	0.263963	1.35463	0.175537	0.276597
ENSMUSG00000000149	Gna12	419.012	445.619	445.619	948.339	1245.75	1178.08	1201.02	840.491	-1.37208	0.159208	-8.61818	6.80283e-18	2.20494e-15
ENSMUSG00000000167	Pih1d2	3.55849	1.74752	1.74752	9.05532	0.705408	5.22266	1.5251	3.366	-0.381778	0.699915	-0.545464	0.585434	0.688111
ENSMUSG00000000168	Dlat	164.58	174.752	174.752	278.245	239.133	243.973	241.729	216.738	-0.543194	0.177222	-3.06505	0.00217634	0.00863114
ENSMUSG00000000171	Sdhd	522.208	550.47	550.47	798.515	768.189	725.203	764.076	668.447	-0.495846	0.123029	-4.0303	5.57047e-05	0.00043427
ENSMUSG00000000184	Ccnd2	8.89622	15.7277	15.7277	22.2267	11.2865	12.6836	20.5889	15.3053	-0.284515	0.519214	-0.547972	0.583711	0.686591
ENSMUSG00000000194	Gpr107	291.796	410.668	410.668	293.886	347.766	292.469	331.71	339.852	0.217673	0.200486	1.08572	0.277601	0.3939
ENSMUSG00000000204	Slfn4	1189.42	484.064	484.064	139.123	1017.9	308.137	957.764	654.354	0.207815	0.519488	0.400037	0.689129	0.774795
ENSMUSG00000000244	Tspan32	166.359	333.777	333.777	68.3265	114.276	135.043	157.086	186.949	1.13717	0.356522	3.18962	0.00142459	0.00614658
ENSMUSG00000000253	Gmpr	40.033	3.49505	3.49505	88.9068	36.6812	39.543	26.6893	34.1205	-1.10171	0.634124	-1.73738	0.0823204	0.15388
ENSMUSG00000000275	Trim25	2777.4	2458.77	2458.77	728.542	1114.54	1151.22	1106.46	1685.1	1.29597	0.198927	6.5148	7.2787e-11	4.20827e-09
ENSMUSG00000000276	Dgke	96.9688	104.851	104.851	79.0283	88.8814	72.3711	41.1778	84.0186	0.505319	0.326598	1.54722	0.12181	0.208661
ENSMUSG00000000278	Scpep1	1259.7	1067.74	1067.74	2460.58	1712.02	1775.7	1657.79	1571.61	-0.732622	0.193692	-3.78241	0.000155314	0.00101295
ENSMUSG00000000282	Mnt	48.0396	96.1138	96.1138	45.2766	73.3624	68.6406	57.9539	69.3573	0.340795	0.359965	0.946743	0.34377	0.461408
ENSMUSG00000000290	Itgb2	2540.76	1221.52	1221.52	6410.35	5258.81	4606.38	5332.52	3798.84	-1.62717	0.282018	-5.76974	7.93943e-09	2.42629e-07
ENSMUSG00000000295	Hddc2	16.0132	71.6485	71.6485	26.3428	42.3245	37.3047	25.1642	41.4923	0.572845	0.501726	1.14175	0.253558	0.367588
ENSMUSG00000000317	Bcl6b	0.889622	0	0	8.23211	0.705408	1.49219	3.81276	2.16173	-0.966897	0.675977	-1.43037	0.152611	0.248565
ENSMUSG00000000318	Clec10a	151.236	186.985	186.985	206.626	141.787	188.016	166.236	175.41	-0.0106469	0.229781	-0.0463351	0.963043	0.9748
ENSMUSG00000000325	Arvcf	7.11697	0	0	20.5803	1.41082	4.47656	8.38806	5.9961	-0.766256	0.697721	-1.09823	0.272106	0.38808
ENSMUSG00000000326	Comt	407.447	454.356	454.356	721.956	401.377	411.844	404.152	465.07	-0.13952	0.261611	-0.53331	0.593819	0.694759
ENSMUSG00000000339	Rtca	57.8254	87.3762	87.3762	102.078	86.0597	90.2773	89.2185	85.7445	-0.254274	0.274642	-0.92584	0.354529	0.472226
ENSMUSG00000000340	Dbt	25.799	8.73762	8.73762	98.7854	72.657	47.0039	28.9769	41.5282	-1.68396	0.529322	-3.18135	0.00146591	0.00629695
ENSMUSG00000000346	Dazap2	3312.95	2479.74	2479.74	4441.23	4483.57	4308.69	4624.11	3732.86	-0.685247	0.152685	-4.48797	7.19055e-06	7.92887e-05
ENSMUSG00000000355	Mcts1	329.16	333.777	333.777	278.245	276.52	288.738	352.299	313.217	0.149532	0.173281	0.862941	0.38817	0.505585
ENSMUSG00000000374	Trappc10	108.534	276.109	276.109	182.753	158.011	172.348	131.921	186.541	0.412916	0.342831	1.20443	0.228424	0.339977
ENSMUSG00000000378	Ccm2	215.288	164.267	164.267	244.494	199.63	196.223	243.254	203.918	-0.267661	0.217371	-1.23135	0.218191	0.328423
ENSMUSG00000000384	Tbrg4	21.3509	34.9505	34.9505	12.3482	24.6893	29.0977	22.8765	25.7519	0.37761	0.453617	0.832442	0.40516	0.521679
ENSMUSG00000000386	Mx1	86.2933	169.51	169.51	52.6855	158.011	73.8633	162.423	124.614	0.300278	0.434565	0.690986	0.489575	0.602727
ENSMUSG00000000399	Ndufa9	348.732	377.465	377.465	470.054	436.647	470.039	454.481	419.269	-0.315751	0.137848	-2.29058	0.0219878	0.0543144
ENSMUSG00000000420	Galnt1	513.312	428.143	428.143	867.665	890.93	856.516	801.441	683.736	-0.88796	0.14386	-6.17239	6.72666e-10	2.96084e-08
ENSMUSG00000000439	Mkrn2	81.8452	8.73762	8.73762	77.3819	64.1921	76.1016	67.1045	54.8715	-0.827524	0.58392	-1.41719	0.156428	0.253278
ENSMUSG00000000440	Pparg	78.2867	29.7079	29.7079	85.614	148.136	68.6406	130.396	81.4984	-1.07434	0.439047	-2.44697	0.0144062	0.0387829
ENSMUSG00000000441	Raf1	429.687	325.039	325.039	175.344	222.909	195.477	228.765	271.752	0.794876	0.207655	3.82787	0.000129257	0.000867879
ENSMUSG00000000489	Pdgfb	103.196	125.822	125.822	186.046	159.422	121.613	134.972	136.699	-0.34279	0.253283	-1.35339	0.175931	0.277097
ENSMUSG00000000530	Acvrl1	171.697	173.005	173.005	207.449	199.63	155.934	266.893	192.516	-0.257494	0.243356	-1.0581	0.290011	0.406975
ENSMUSG00000000531	Grasp	45.3707	24.4653	24.4653	35.3981	52.2002	51.4805	50.3284	40.5298	-0.509159	0.39128	-1.30126	0.193168	0.297785
ENSMUSG00000000532	Acvr1b	12.4547	34.9505	34.9505	23.0499	49.3785	35.0664	38.1276	32.5683	-0.383325	0.474873	-0.807214	0.419543	0.535749
ENSMUSG00000000538	Tom1l2	169.028	108.346	108.346	144.062	86.7652	86.5469	84.6432	112.534	0.346891	0.321256	1.0798	0.280233	0.397004
ENSMUSG00000000552	Zfp385a	36.4745	47.1832	47.1832	44.4534	69.8354	99.9766	79.3053	60.6302	-0.705447	0.369828	-1.9075	0.0564558	0.114344
ENSMUSG00000000555	Itga5	1170.74	686.777	686.777	870.134	1401.65	1467.57	1681.43	1137.87	-0.644369	0.28606	-2.25257	0.0242864	0.0587258
ENSMUSG00000000561	Wdr77	64.0528	31.4554	31.4554	84.7908	45.8515	78.3398	76.2551	58.8858	-0.658011	0.397324	-1.65611	0.0977003	0.175631
ENSMUSG00000000563	Atp5f1	844.251	791.628	791.628	873.427	953.711	984.844	960.815	885.758	-0.217871	0.12104	-1.8	0.071861	0.138209
ENSMUSG00000000568	Hnrnpd	332.719	281.351	281.351	310.351	442.996	544.648	512.434	386.55	-0.579631	0.241174	-2.40338	0.0162444	0.0425755
ENSMUSG00000000579	Dynlt1c	110.313	145.045	145.045	23.0499	43.7353	48.4961	46.5156	80.3141	1.61051	0.333997	4.82192	1.42182e-06	2.00102e-05
ENSMUSG00000000581	C1d	312.257	202.713	202.713	316.936	315.317	385.73	353.061	298.39	-0.493686	0.229037	-2.15549	0.0311237	0.0711627
ENSMUSG00000000594	Gm2a	2417.99	1366.56	1366.56	1794.6	2679.14	2659.08	2697.14	2140.15	-0.496957	0.2621	-1.89606	0.0579524	0.116756
ENSMUSG00000000600	Krit1	548.007	692.02	692.02	239.555	213.033	258.895	262.318	415.121	1.37712	0.177801	7.7453	9.53567e-15	1.7287e-12
ENSMUSG00000000605	Clcn4	551.566	470.084	470.084	611.646	486.026	576.73	460.581	518.102	-0.0969468	0.179336	-0.540586	0.588793	0.690843
ENSMUSG00000000628	Hk2	213.509	770.658	770.658	172.874	232.079	261.133	222.665	377.654	1.27627	0.389022	3.28071	0.00103545	0.00475786
ENSMUSG00000000631	Myo18a	261.549	262.129	262.129	294.71	385.153	216.367	338.573	288.658	-0.230106	0.24051	-0.956741	0.338698	0.456491
ENSMUSG00000000682	Cd52	1496.34	2844.97	2844.97	629.757	2192.41	1692.89	2250.29	1993.09	0.459647	0.387977	1.18473	0.236125	0.347952
ENSMUSG00000000686	Abhd15	37.3641	20.9703	20.9703	47.7463	51.4948	38.0508	41.1778	36.8249	-0.655544	0.388873	-1.68575	0.0918435	0.166897
ENSMUSG00000000693	Loxl3	27.5783	6.9901	6.9901	14.8178	52.2002	34.3203	45.7531	26.95	-1.0613	0.573042	-1.85204	0.0640196	0.12599
ENSMUSG00000000708	Kat2b	87.1829	160.772	160.772	112.78	129.09	164.141	98.3691	130.444	0.0940011	0.318603	0.295041	0.767962	0.835384
ENSMUSG00000000711	Rab5b	123.657	68.1534	68.1534	104.548	147.43	178.316	119.721	115.711	-0.60891	0.333446	-1.82611	0.0678337	0.132292
ENSMUSG00000000732	Icosl	36.4745	8.73762	8.73762	63.3873	28.2163	37.3047	44.9905	32.5498	-0.993663	0.53876	-1.84435	0.0651322	0.127897
ENSMUSG00000000738	Spg7	147.677	251.643	251.643	257.665	232.785	167.125	253.167	223.101	-0.0746663	0.279283	-0.26735	0.7892	0.850486
ENSMUSG00000000740	Rpl13	1370.91	1999.17	1999.17	1109.69	1361.44	1448.91	1371.07	1522.91	0.425802	0.195268	2.1806	0.0292133	0.0676185
ENSMUSG00000000743	Chmp1a	726.821	370.475	370.475	651.16	562.21	506.598	532.261	531.429	-0.188661	0.276893	-0.68135	0.49565	0.608246
ENSMUSG00000000751	Rpa1	161.911	223.683	223.683	267.544	192.576	205.176	170.811	206.484	-0.0468191	0.249219	-0.187863	0.850984	0.896054
ENSMUSG00000000753	Serpinf1	86.2933	90.8713	90.8713	38.6909	61.3705	41.7812	88.4559	71.1906	0.585868	0.363726	1.61074	0.107236	0.189149
ENSMUSG00000000759	Tubgcp3	276.672	342.515	342.515	126.775	151.663	135.043	93.7938	209.854	1.29442	0.23597	5.48551	4.12269e-08	9.84293e-07
ENSMUSG00000000776	Polr3d	48.9292	73.396	73.396	46.923	40.9136	59.6875	42.7029	55.1355	0.414256	0.32868	1.26036	0.207539	0.315497
ENSMUSG00000000787	Ddx3x	1207.22	1067.74	1067.74	2796.45	2216.39	2202.47	1611.27	1738.47	-0.962516	0.208676	-4.6125	3.97856e-06	4.80301e-05
ENSMUSG00000000804	Usp32	86.2933	113.589	113.589	91.3765	123.446	98.4844	96.0815	103.266	0.0162859	0.256821	0.0634132	0.949437	0.965689
ENSMUSG00000000811	Txnrd3	11.5651	0	0	36.2213	34.565	20.1445	3.0502	15.078	-1.27559	0.698083	-1.82728	0.0676573	0.132031
ENSMUSG00000000823	Zfp512b	46.2603	1.74752	1.74752	30.4588	45.1461	47.0039	27.4518	28.5451	-0.742912	0.662778	-1.12091	0.262328	0.377647
ENSMUSG00000000826	Dnajc5	726.821	356.495	356.495	530.148	573.496	727.441	613.854	554.964	-0.327806	0.289604	-1.13191	0.257671	0.372137
ENSMUSG00000000827	Tpd52l2	303.361	304.069	304.069	379.5	304.031	343.203	275.281	316.216	-0.0971966	0.184896	-0.525684	0.599108	0.699493
ENSMUSG00000000838	Fmr1	307.809	389.698	389.698	265.074	348.471	305.152	247.829	321.962	0.301267	0.206662	1.45777	0.144903	0.238553
ENSMUSG00000000861	Bcl11a	16.0132	0	0	28.8124	10.5811	13.4297	4.57531	10.4874	-0.670994	0.70003	-0.958521	0.3378	0.45574
ENSMUSG00000000876	Pxmp4	57.8254	108.346	108.346	118.542	64.1921	55.957	72.4424	83.6646	0.206054	0.378431	0.544496	0.5861	0.688666
ENSMUSG00000000881	Dlg3	13.3443	111.842	111.842	1.64642	20.4568	23.875	25.9267	44.1332	1.51345	0.635993	2.37967	0.0173281	0.0448009
ENSMUSG00000000902	Smarcb1	169.028	110.094	110.094	248.61	189.049	257.402	215.802	185.726	-0.76781	0.255991	-2.99936	0.00270548	0.0102254
ENSMUSG00000000916	Nsun5	48.0396	50.6782	50.6782	41.9838	53.611	59.6875	41.9403	49.5169	0.00922085	0.318417	0.0289585	0.976898	0.984074
ENSMUSG00000000957	Mmp14	1246.36	1125.41	1125.41	893.184	3036.78	2897.08	3308.71	1947.56	-1.03778	0.364589	-2.84643	0.00442128	0.0151717
ENSMUSG00000000958	Slc7a7	277.562	332.03	332.03	350.688	339.301	409.605	327.134	338.336	-0.187051	0.177259	-1.05525	0.291313	0.408533
ENSMUSG00000000959	Oxa1l	132.554	85.6287	85.6287	121.835	95.23	91.0234	72.4424	97.7632	0.0999153	0.308234	0.324154	0.745821	0.81911
ENSMUSG00000000976	Heatr6	113.872	96.1138	96.1138	79.8515	155.895	110.422	122.771	110.72	-0.186776	0.299066	-0.624531	0.532279	0.641883
ENSMUSG00000000982	Ccl3	762.406	1425.98	1425.98	788.636	604.534	760.269	642.068	915.696	0.75666	0.255177	2.96523	0.00302452	0.0111939
ENSMUSG00000001016	Ilf2	183.262	286.594	286.594	157.233	180.584	176.824	202.076	210.453	0.468872	0.239798	1.95528	0.0505506	0.105111
ENSMUSG00000001017	Chtop	452.817	241.158	241.158	458.529	361.169	364.84	412.54	361.745	-0.334289	0.273532	-1.22212	0.221661	0.332803
ENSMUSG00000001018	Snapin	374.531	197.47	197.47	477.463	433.826	338.727	347.723	338.173	-0.601318	0.288732	-2.08262	0.037286	0.082416
ENSMUSG00000001020	S100a4	2245.41	3199.72	3199.72	1848.93	1353.68	1404.15	1476.3	2103.99	0.902432	0.198305	4.55073	5.34599e-06	6.12869e-05
ENSMUSG00000001025	S100a6	3946.36	8489.47	8489.47	4218.13	2650.92	2319.61	2584.29	4671.18	1.18056	0.309677	3.81224	0.000137714	0.00091775
ENSMUSG00000001029	Icam2	9.78584	1.74752	1.74752	19.7571	35.2704	19.3984	40.4152	18.3031	-1.91128	0.597979	-3.19624	0.0013923	0.00605368
ENSMUSG00000001034	Mapk7	317.595	295.332	295.332	136.653	232.079	188.016	224.953	241.423	0.612786	0.239544	2.55813	0.0105237	0.0304961
ENSMUSG00000001036	Epn2	39.1434	41.9406	41.9406	67.5033	35.9758	16.4141	16.7761	37.0991	0.221705	0.514103	0.431246	0.666289	0.756542
ENSMUSG00000001052	Sec24b	321.153	255.139	255.139	305.411	288.512	271.578	245.541	277.496	0.0045402	0.189049	0.024016	0.98084	0.986558
ENSMUSG00000001053	N4bp3	4.44811	0	0	44.4534	17.6352	16.4141	6.10041	12.7216	-1.99751	0.684619	-2.9177	0.00352623	0.0126523
ENSMUSG00000001054	Rmnd5b	159.242	22.7178	22.7178	264.251	129.795	123.105	137.259	122.727	-1.00058	0.552176	-1.81206	0.0699767	0.135494
ENSMUSG00000001056	Nhp2	267.776	545.228	545.228	254.372	278.636	330.52	292.82	359.226	0.614779	0.280845	2.18903	0.0285948	0.0665325
ENSMUSG00000001062	Vps9d1	274.893	80.3861	80.3861	210.742	182.701	183.539	125.058	162.529	-0.232739	0.430181	-0.541025	0.58849	0.69064
ENSMUSG00000001065	Zfp276	286.458	270.866	270.866	60.9176	83.2381	99.2305	73.2049	163.54	1.74918	0.235966	7.41282	1.23643e-13	1.74011e-11
ENSMUSG00000001082	Mfsd10	178.814	213.198	213.198	200.04	166.476	194.73	220.377	198.119	0.0390671	0.20228	0.193133	0.846855	0.893113
ENSMUSG00000001089	Luzp1	304.251	546.975	546.975	409.136	426.772	323.059	382.801	419.995	0.259413	0.254505	1.01928	0.308069	0.425395
ENSMUSG00000001098	Kctd10	154.794	68.1534	68.1534	216.505	235.606	180.555	192.925	159.527	-1.00088	0.33581	-2.98048	0.00287797	0.0107745
ENSMUSG00000001100	Poldip2	168.139	52.4257	52.4257	158.88	157.306	138.773	137.259	123.601	-0.615764	0.411122	-1.49776	0.134194	0.224835
ENSMUSG00000001105	Ift20	133.443	279.604	279.604	119.366	143.903	196.969	132.684	183.653	0.594681	0.32685	1.81943	0.0688453	0.133875
ENSMUSG00000001119	Col6a1	56.9358	5.24257	5.24257	10.7017	63.4867	74.6094	99.1317	45.0501	-0.969714	0.651224	-1.48906	0.136471	0.227756
ENSMUSG00000001123	Lgals9	898.518	505.034	505.034	1560.81	1130.77	1166.14	1258.97	1003.61	-0.96843	0.255309	-3.79317	0.000148734	0.000977788
ENSMUSG00000001127	Araf	459.934	148.54	148.54	380.324	268.055	241.734	295.107	277.462	-0.203383	0.396974	-0.512333	0.608418	0.707813
ENSMUSG00000001128	Cfp	1914.47	2030.62	2030.62	1196.13	1923.65	1998.04	2038.3	1875.97	0.150914	0.214651	0.703066	0.482015	0.59582
ENSMUSG00000001131	Timp1	315.816	690.272	690.272	189.339	335.774	394.684	392.714	429.839	0.731422	0.344474	2.1233	0.0337285	0.0760796
ENSMUSG00000001134	Uxt	102.307	113.589	113.589	64.2105	57.138	72.3711	60.2415	83.3494	0.760803	0.24705	3.07956	0.0020731	0.00831104
ENSMUSG00000001138	Cnnm3	22.2405	26.2129	26.2129	42.807	87.4706	30.5898	105.995	48.7898	-1.23461	0.477701	-2.58449	0.00975237	0.0287438
ENSMUSG00000001143	Lman2l	111.203	110.094	110.094	130.891	163.655	188.762	182.25	142.421	-0.574235	0.233617	-2.45802	0.0139705	0.0379259
ENSMUSG00000001150	Mcm3ap	80.9556	10.4851	10.4851	143.239	86.7652	89.5312	156.323	82.5406	-1.40904	0.561513	-2.50937	0.0120948	0.0341227
ENSMUSG00000001151	Pcnt	209.951	482.317	482.317	167.112	176.352	188.016	173.099	268.452	1.08886	0.305887	3.55968	0.000371313	0.00206852
ENSMUSG00000001156	Mxd1	2554.99	2271.78	2271.78	455.236	1000.97	980.367	950.901	1498	1.42286	0.275097	5.17221	2.31344e-07	4.20112e-06
ENSMUSG00000001157	Gmcl1	104.086	55.9208	55.9208	131.714	137.555	119.375	119.721	103.47	-0.752546	0.305641	-2.46219	0.0138092	0.037574
ENSMUSG00000001158	Snrnp27	152.125	414.163	414.163	99.6086	145.314	117.883	131.921	210.74	1.29881	0.356167	3.64663	0.000265698	0.00156891
ENSMUSG00000001173	Ocrl	539.111	510.277	510.277	472.523	438.058	264.863	392.714	446.832	0.39655	0.231817	1.71062	0.0871516	0.16053
ENSMUSG00000001175	Calm1	6134.83	10168.8	10168.8	6279.46	7763.72	8534.57	8634.37	8240.66	0.172379	0.22535	0.76494	0.444307	0.559886
ENSMUSG00000001211	Agpat3	97.8584	99.6089	99.6089	168.758	107.222	92.5156	128.871	113.492	-0.313101	0.288672	-1.08462	0.278088	0.394434
ENSMUSG00000001227	Sema6b	17.7924	1.74752	1.74752	57.6248	31.0379	78.3398	67.1045	36.4849	-2.20209	0.593753	-3.70876	0.000208277	0.00128441
ENSMUSG00000001228	Uhrf1	40.9226	31.4554	31.4554	72.4426	92.4084	55.2109	79.3053	57.6001	-1.026	0.339202	-3.02475	0.00248841	0.009581
ENSMUSG00000001229	Dpp9	199.275	47.1832	47.1832	311.997	228.552	251.434	207.414	184.72	-1.1723	0.455004	-2.57645	0.009982	0.0292834
ENSMUSG00000001247	Lsr	66.7216	83.8812	83.8812	80.6747	124.152	96.9922	100.657	90.9942	-0.361451	0.2772	-1.30394	0.192255	0.296716
ENSMUSG00000001248	Gramd1a	997.266	298.827	298.827	465.938	484.615	440.941	491.083	496.785	0.16514	0.389484	0.423997	0.671568	0.761348
ENSMUSG00000001249	Hpn	24.9094	0	0	9.05532	11.9919	9.69922	17.5387	10.4564	-0.245217	0.700043	-0.350288	0.726122	0.804746
ENSMUSG00000001270	Ckb	556.014	601.148	601.148	1098.16	886.698	620.75	815.93	739.979	-0.532325	0.2193	-2.42738	0.0152084	0.0405435
ENSMUSG00000001280	Sp1	86.2933	141.549	141.549	150.648	177.057	129.074	176.912	143.298	-0.363246	0.275599	-1.31802	0.187496	0.291025
ENSMUSG00000001281	Itgb7	257.99	183.49	183.49	479.932	371.75	396.922	356.874	318.635	-0.911183	0.220267	-4.13672	3.52299e-05	0.000297645
ENSMUSG00000001285	Myg1	80.9556	78.6386	78.6386	79.0283	90.2922	76.1016	92.2687	82.2748	-0.0841824	0.247472	-0.34017	0.733729	0.80982
ENSMUSG00000001288	Rarg	42.7018	27.9604	27.9604	42.807	26.8055	43.2734	48.0407	37.0785	-0.243526	0.393406	-0.61902	0.535903	0.644734
ENSMUSG00000001289	Pfdn5	386.096	555.713	555.713	352.334	355.525	449.894	385.088	434.338	0.358597	0.207239	1.73035	0.0835675	0.155558
ENSMUSG00000001305	Rrp15	29.3575	41.9406	41.9406	45.2766	76.8894	65.6562	50.3284	50.1985	-0.629769	0.360215	-1.74831	0.0804099	0.151074
ENSMUSG00000001313	Rnd2	16.9028	6.9901	6.9901	27.166	17.6352	14.9219	12.9634	14.7956	-0.614098	0.548699	-1.11919	0.26306	0.378438
ENSMUSG00000001323	Srr	43.5915	12.2327	12.2327	42.807	41.6191	41.7812	32.7897	32.4363	-0.644286	0.494807	-1.3021	0.192884	0.297489
ENSMUSG00000001348	Acp5	545.338	227.178	227.178	180.283	529.761	644.625	476.595	404.423	-0.407697	0.424435	-0.960562	0.336772	0.454755
ENSMUSG00000001366	Fbxo9	118.32	24.4653	24.4653	119.366	87.4706	82.0703	83.8806	77.1482	-0.605304	0.50264	-1.20425	0.228493	0.339977
ENSMUSG00000001376	Vps50	353.18	567.945	567.945	344.926	338.596	273.816	330.185	396.656	0.60254	0.229289	2.62786	0.0085923	0.0259247
ENSMUSG00000001380	Hars	241.977	136.307	136.307	300.472	287.101	267.848	257.742	232.536	-0.657544	0.263051	-2.49969	0.0124303	0.0348506
ENSMUSG00000001383	Zmat2	189.489	284.846	284.846	208.272	220.087	189.508	200.551	225.372	0.289144	0.221407	1.30594	0.191574	0.295981
ENSMUSG00000001403	Ube2c	27.5783	48.9307	48.9307	65.0337	86.0597	58.1953	91.5061	60.8906	-0.812004	0.35839	-2.2657	0.0234696	0.0572308
ENSMUSG00000001415	Smg5	225.964	283.099	283.099	130.067	144.609	188.016	123.533	196.912	0.819287	0.236607	3.46265	0.00053489	0.00279354
ENSMUSG00000001416	Cct3	620.956	459.599	459.599	663.508	725.159	819.957	739.675	641.208	-0.507176	0.181694	-2.79138	0.00524846	0.0174611
ENSMUSG00000001418	Glmp	886.063	837.064	837.064	754.062	627.107	671.484	664.945	753.97	0.327583	0.133407	2.45552	0.014068	0.038046
ENSMUSG00000001419	Mef2d	480.396	699.01	699.01	507.098	577.024	690.137	609.278	608.85	0.0656332	0.207733	0.31595	0.75204	0.823514
ENSMUSG00000001424	Snd1	593.378	415.911	415.911	545.789	623.58	810.258	754.163	594.141	-0.506073	0.226385	-2.23545	0.025388	0.0607087
ENSMUSG00000001435	Col18a1	28.4679	1.74752	1.74752	40.3374	79.0057	12.6836	44.228	29.7454	-1.29756	0.661103	-1.96273	0.049678	0.103558
ENSMUSG00000001436	Slc19a1	28.4679	1.74752	1.74752	69.1498	51.4948	72.3711	87.6934	44.6674	-1.93654	0.609441	-3.17757	0.00148514	0.00635657
ENSMUSG00000001440	Kpnb1	99.6376	148.54	148.54	158.057	244.776	255.91	214.277	181.391	-0.705619	0.273549	-2.5795	0.00989435	0.0290662
ENSMUSG00000001441	Npepps	217.957	447.366	447.366	227.206	230.668	280.531	227.24	296.905	0.586411	0.285737	2.05227	0.0401431	0.0875373
ENSMUSG00000001445	Mrpl10	118.32	120.579	120.579	130.067	143.198	120.867	157.086	130.099	-0.197926	0.217905	-0.908316	0.363712	0.481624
ENSMUSG00000001467	Cyp51	85.4037	29.7079	29.7079	181.93	122.036	91.0234	103.707	91.9307	-1.19212	0.435035	-2.74028	0.00613863	0.0197596
ENSMUSG00000001472	Tcf25	1662.7	1445.2	1445.2	882.483	1048.94	1093.03	1046.98	1232.08	0.571486	0.143685	3.97736	6.96853e-05	0.000523423
ENSMUSG00000001473	Tubb6	1343.33	1128.9	1128.9	1367.35	1304.3	1165.4	1118.66	1222.41	-0.0428868	0.150027	-0.28586	0.774985	0.840763
ENSMUSG00000001482	Def8	124.547	26.2129	26.2129	197.571	182.701	128.328	222.665	129.748	-1.37845	0.485459	-2.83948	0.00451878	0.0154073
ENSMUSG00000001506	Col1a1	332.719	260.381	260.381	51.8623	609.472	578.223	946.326	434.195	-0.767779	0.541203	-1.41865	0.156	0.252815
ENSMUSG00000001517	Foxm1	15.1236	10.4851	10.4851	41.1606	59.9597	36.5586	62.5292	33.7574	-1.79522	0.437346	-4.1048	4.04659e-05	0.000332175
ENSMUSG00000001518	Itfg2	21.3509	64.6584	64.6584	19.7571	26.8055	30.5898	32.7897	37.23	0.742401	0.459991	1.61395	0.106539	0.188201
ENSMUSG00000001524	Gtf2h4	50.7084	22.7178	22.7178	61.7409	74.0678	61.1797	78.5428	53.0965	-0.969787	0.388687	-2.49503	0.0125945	0.0352138
ENSMUSG00000001525	Tubb5	604.053	505.034	505.034	1409.34	1133.59	931.125	1163.65	893.118	-1.08332	0.192073	-5.64014	1.69911e-08	4.68393e-07
ENSMUSG00000001542	Ell2	598.715	719.98	719.98	319.406	634.162	652.086	694.684	619.859	0.229524	0.279482	0.821246	0.411506	0.52801
ENSMUSG00000001552	Jup	40.9226	61.1633	61.1633	189.339	55.0218	61.9258	75.4926	77.8612	-0.715594	0.460412	-1.55425	0.120126	0.206371
ENSMUSG00000001569	Nom1	139.671	424.648	424.648	163.819	270.171	211.145	133.446	252.507	0.689375	0.394676	1.74669	0.0806919	0.151497
ENSMUSG00000001576	Ergic1	236.639	99.6089	99.6089	246.963	245.482	264.117	244.779	205.314	-0.722463	0.331181	-2.18148	0.0291481	0.0675262
ENSMUSG00000001627	Ifrd1	3318.29	3867.27	3867.27	1464.49	2690.43	2840.38	2761.96	2972.87	0.575562	0.24666	2.33342	0.019626	0.0495445
ENSMUSG00000001630	Stk38l	216.178	136.307	136.307	153.117	260.295	136.535	247.067	183.687	-0.266283	0.327162	-0.813918	0.415692	0.531833
ENSMUSG00000001632	Brpf1	873.609	393.193	393.193	498.043	507.188	578.969	588.69	547.555	0.0301703	0.302656	0.0996851	0.920594	0.945347
ENSMUSG00000001642	Akr1b3	406.557	484.064	484.064	505.452	458.515	397.668	439.23	453.65	0.0211481	0.167514	0.126247	0.899537	0.932582
ENSMUSG00000001663	Gstt1	24.0198	0	0	2.46963	38.092	24.6211	38.8901	18.2989	-0.786161	0.700075	-1.12297	0.261452	0.376936
ENSMUSG00000001665	Gstt3	19.5717	29.7079	29.7079	11.525	39.5028	39.543	41.1778	30.1051	-0.289405	0.496071	-0.583393	0.559629	0.665735
ENSMUSG00000001666	Ddt	49.8188	64.6584	64.6584	46.923	91.703	82.8164	99.1317	71.3871	-0.40638	0.350344	-1.15995	0.246071	0.35897
ENSMUSG00000001674	Ddx18	44.4811	103.104	103.104	92.1997	116.392	86.5469	99.1317	92.1371	-0.241262	0.350422	-0.688491	0.491144	0.604311
ENSMUSG00000001687	Ubl3	2315.69	2084.8	2084.8	1776.49	1599.86	1572.02	1560.18	1856.26	0.408109	0.119754	3.40791	0.000654626	0.00327957
ENSMUSG00000001700	Gramd3	113.872	29.7079	29.7079	176.167	136.144	105.199	94.5564	97.9077	-0.974817	0.470806	-2.07053	0.038403	0.0844314
ENSMUSG00000001707	Eef1e1	104.086	129.317	129.317	99.6086	137.555	155.934	140.309	128.018	-0.145202	0.2568	-0.565429	0.571782	0.676001
ENSMUSG00000001729	Akt1	571.137	536.49	536.49	920.35	901.511	872.184	960.815	756.997	-0.729288	0.122127	-5.97157	2.34983e-09	8.60746e-08
ENSMUSG00000001741	Il16	86.2933	20.9703	20.9703	130.067	74.7732	63.418	77.7802	67.7532	-0.835948	0.500684	-1.66961	0.0949961	0.171635
ENSMUSG00000001750	Tcirg1	1984.75	1717.82	1717.82	1003.49	1364.26	1268.36	1303.96	1480.06	0.542149	0.162744	3.33131	0.000864398	0.00410733
ENSMUSG00000001751	Naglu	535.552	304.069	304.069	792.753	595.364	708.043	712.223	564.582	-0.843918	0.25205	-3.34822	0.000813334	0.00390634
ENSMUSG00000001755	Coasy	72.0594	248.148	248.148	176.167	96.6409	99.9766	114.383	150.789	0.567273	0.420639	1.3486	0.177465	0.279102
ENSMUSG00000001763	Tspan33	10.6755	27.9604	27.9604	1.64642	17.6352	7.46094	5.33786	14.0967	1.03806	0.631061	1.64494	0.0999822	0.178771
ENSMUSG00000001767	Crnkl1	156.573	174.752	174.752	158.057	162.244	141.758	176.912	163.578	0.0719228	0.197693	0.363811	0.715999	0.796498
ENSMUSG00000001768	Rin2	613.839	429.891	429.891	2421.89	1051.76	1038.56	1145.35	1018.74	-1.43372	0.329222	-4.35486	1.33153e-05	0.000133084
ENSMUSG00000001774	Chordc1	252.653	192.228	192.228	189.339	240.544	247.703	262.318	225.287	-0.134357	0.220329	-0.609802	0.541993	0.650708
ENSMUSG00000001783	Rtcb	294.465	192.228	192.228	526.032	511.421	389.461	391.189	356.717	-0.964599	0.244098	-3.95168	7.76033e-05	0.00057087
ENSMUSG00000001785	Pwp1	142.339	258.634	258.634	289.77	237.017	288.738	223.428	242.651	-0.240513	0.271243	-0.886707	0.375237	0.493123
ENSMUSG00000001786	Fbxo7	97.8584	26.2129	26.2129	97.9622	95.23	110.422	86.9308	77.2613	-0.817854	0.455225	-1.79659	0.0724004	0.139019
ENSMUSG00000001794	Capns1	342.504	510.277	510.277	339.986	438.764	636.418	598.603	482.404	-0.145232	0.277423	-0.523505	0.600623	0.700651
ENSMUSG00000001829	Clpb	79.1763	27.9604	27.9604	154.764	152.368	119.375	131.921	99.075	-1.4525	0.39501	-3.67711	0.00023589	0.00142789
ENSMUSG00000001833	2007-09-01	1015.06	999.584	999.584	1559.99	1511.69	1558.59	1525.1	1309.94	-0.611297	0.100491	-6.0831	1.17882e-09	4.66987e-08
ENSMUSG00000001844	Zdhhc4	179.704	318.049	318.049	156.41	137.555	141.012	154.798	200.797	0.843041	0.261403	3.22506	0.00125946	0.00557043
ENSMUSG00000001847	Rac1	1903.79	1024.05	1024.05	2522.32	2606.48	2484.49	2740.61	2043.68	-0.941253	0.244585	-3.84836	0.00011891	0.00080959
ENSMUSG00000001855	Nup214	257.101	265.624	265.624	258.488	253.241	267.102	239.441	258.089	0.0436559	0.156756	0.278496	0.780632	0.844507
ENSMUSG00000001865	Cpa3	32.0264	20.9703	20.9703	13.9946	2.82163	30.5898	1.5251	17.5569	0.679949	0.66126	1.02826	0.303826	0.421167
ENSMUSG00000001891	Ugp2	373.641	207.955	207.955	532.618	522.002	541.664	497.946	411.969	-0.948461	0.249434	-3.80246	0.000143269	0.000947684
ENSMUSG00000001909	Trmt1	134.333	103.104	103.104	130.891	93.1138	118.629	107.52	112.956	0.0242953	0.253567	0.095814	0.923668	0.947861
ENSMUSG00000001910	Nacc1	41.8122	36.698	36.698	31.282	56.4326	55.2109	58.7164	45.2643	-0.358654	0.366288	-0.979159	0.327501	0.445329
ENSMUSG00000001911	Nfix	30.2471	22.7178	22.7178	73.2658	98.0517	81.3242	112.095	62.9171	-1.71253	0.339991	-5.03699	4.72905e-07	7.74609e-06
ENSMUSG00000001918	Slc1a5	402.109	312.807	312.807	320.229	330.131	383.492	362.974	346.364	-0.0201948	0.183072	-0.110311	0.912163	0.940566
ENSMUSG00000001924	Uba1	686.788	197.47	197.47	1341.01	1213.3	1389.23	1205.59	890.123	-1.67272	0.390507	-4.28346	1.84012e-05	0.000172648
ENSMUSG00000001930	Vwf	50.7084	24.4653	24.4653	73.2658	20.4568	32.082	16.7761	34.6028	-0.0667915	0.542239	-0.123177	0.901967	0.93406
ENSMUSG00000001942	Siae	87.1829	61.1633	61.1633	262.604	251.125	179.809	213.514	159.509	-1.61416	0.267378	-6.03699	1.57013e-09	5.95428e-08
ENSMUSG00000001962	Fam50a	296.244	429.891	429.891	274.129	279.341	339.473	319.509	338.354	0.331753	0.211262	1.57034	0.116337	0.201611
ENSMUSG00000001964	Emd	50.7084	131.064	131.064	82.3211	83.9435	89.5312	77.7802	92.3447	0.283626	0.362913	0.781526	0.434493	0.550283
ENSMUSG00000001995	Sipa1l2	433.246	269.119	269.119	196.748	302.62	277.547	265.368	287.681	0.308253	0.263225	1.17106	0.241574	0.353762
ENSMUSG00000001998	Ap4e1	55.1566	27.9604	27.9604	65.0337	98.7571	75.3555	96.844	63.8668	-1.05803	0.371871	-2.84514	0.00443923	0.0152137
ENSMUSG00000001999	Blvra	544.449	1011.82	1011.82	702.199	490.964	550.617	599.365	701.604	0.524977	0.260857	2.01251	0.0441667	0.0943097
ENSMUSG00000002010	Idh3g	416.343	220.188	220.188	512.037	510.01	530.473	443.805	407.578	-0.765242	0.26679	-2.86833	0.00412643	0.0143502
ENSMUSG00000002014	Ssr4	652.982	882.5	882.5	350.688	417.601	426.019	402.627	573.56	0.992415	0.181353	5.47229	4.44256e-08	1.03977e-06
ENSMUSG00000002015	Bcap31	627.183	849.297	849.297	954.102	1038.36	1099	1053.85	924.44	-0.416934	0.167458	-2.48978	0.0127824	0.0355857
ENSMUSG00000002017	Fam98a	45.3707	101.356	101.356	69.1498	76.8894	70.8789	69.3922	76.342	0.175266	0.346425	0.505927	0.612908	0.711567
ENSMUSG00000002028	Kmt2a	193.938	304.069	304.069	135.83	149.546	199.953	170.049	208.208	0.674035	0.258899	2.60347	0.00922851	0.0274494
ENSMUSG00000002031	Ift46	33.8056	78.6386	78.6386	116.896	59.2542	41.7812	62.5292	67.3634	-0.134666	0.443942	-0.303342	0.761629	0.830925
ENSMUSG00000002043	Trappc6a	167.249	436.881	436.881	126.775	127.679	140.266	131.159	223.841	1.30896	0.33573	3.89885	9.66518e-05	0.000686446
ENSMUSG00000002052	Supt6	228.633	241.158	241.158	257.665	251.125	250.687	241.729	244.594	-0.0806307	0.157367	-0.512373	0.60839	0.707813
ENSMUSG00000002055	Spag5	10.6755	0	0	56.8016	42.3245	18.6523	42.7029	24.451	-2.15851	0.654941	-3.29574	0.000981625	0.00455847
ENSMUSG00000002058	Unc119	41.8122	43.6881	43.6881	71.6194	44.4407	44.0195	28.2144	45.3546	-0.116992	0.397764	-0.294123	0.768664	0.835668
ENSMUSG00000002059	Rab34	37.3641	27.9604	27.9604	79.8515	33.1542	40.2891	36.6025	40.4546	-0.530331	0.434997	-1.21916	0.222783	0.334019
ENSMUSG00000002064	Sdf2	185.931	136.307	136.307	221.444	188.344	191	204.364	180.528	-0.37336	0.216505	-1.72449	0.0846191	0.157133
ENSMUSG00000002068	Ccne1	16.9028	26.2129	26.2129	24.6963	35.2704	21.6367	15.251	23.7404	-0.0787692	0.462505	-0.17031	0.864766	0.90593
ENSMUSG00000002083	Bbc3	16.9028	24.4653	24.4653	91.3765	66.3083	70.8789	60.2415	50.6627	-1.62085	0.361093	-4.48873	7.16483e-06	7.91684e-05
ENSMUSG00000002100	Mybpc3	2.66887	33.203	33.203	9.87854	9.87571	14.1758	16.0136	17.0026	0.62463	0.621078	1.00572	0.314551	0.432003
ENSMUSG00000002102	Psmc3	585.371	536.49	536.49	719.487	655.324	547.633	686.296	609.584	-0.233191	0.160531	-1.45263	0.146328	0.240418
ENSMUSG00000002103	Acp2	1015.95	861.529	861.529	973.859	1357.2	1029.61	1437.41	1076.73	-0.38428	0.199773	-1.92359	0.0544064	0.111055
ENSMUSG00000002104	Rapsn	36.4745	71.6485	71.6485	4.93927	11.2865	35.8125	12.9634	34.9676	1.50606	0.55734	2.70222	0.00688776	0.0216172
ENSMUSG00000002105	Slc39a13	180.593	192.228	192.228	107.017	142.492	139.52	149.46	157.648	0.469467	0.214918	2.1844	0.0289328	0.0671437
ENSMUSG00000002107	Celf2	822.9	980.361	980.361	908.825	1077.86	967.684	1011.14	964.162	-0.0975776	0.143395	-0.680481	0.4962	0.608712
ENSMUSG00000002108	Nr1h3	366.524	251.643	251.643	126.775	349.177	199.207	432.367	282.477	0.0627846	0.390198	0.160904	0.872169	0.911987
ENSMUSG00000002109	Ddb2	44.4811	22.7178	22.7178	23.0499	11.9919	14.1758	9.15061	21.1836	0.906946	0.501265	1.80932	0.0704019	0.136047
ENSMUSG00000002111	Spi1	1557.73	1869.85	1869.85	1716.4	1853.81	1613.8	1730.99	1744.63	0.0284464	0.133593	0.212933	0.831379	0.881862
ENSMUSG00000002129	Sf3a1	85.4037	104.851	104.851	187.692	179.879	204.43	217.327	154.919	-0.992566	0.215735	-4.60087	4.20738e-06	5.00024e-05
ENSMUSG00000002147	Stat6	1067.55	686.777	686.777	1748.5	1357.2	1299.7	1446.56	1184.72	-0.821166	0.220067	-3.73144	0.000190389	0.00119507
ENSMUSG00000002204	Napsa	275.783	319.797	319.797	251.079	414.78	386.477	417.878	340.799	-0.263857	0.235642	-1.11974	0.262825	0.378152
ENSMUSG00000002205	Vrk3	116.54	103.104	103.104	103.725	143.903	112.66	119.721	114.68	-0.147986	0.239282	-0.618459	0.536273	0.644926
ENSMUSG00000002210	Smg9	167.249	260.381	260.381	149.824	124.857	153.695	150.223	180.944	0.635257	0.243252	2.61152	0.00901418	0.0269092
ENSMUSG00000002221	Paxip1	110.313	47.1832	47.1832	127.598	149.546	153.695	118.195	107.673	-0.911408	0.357462	-2.54967	0.0107826	0.0311075
ENSMUSG00000002222	Rmnd5a	178.814	157.277	157.277	193.455	230.668	286.5	199.788	200.54	-0.451889	0.228827	-1.97481	0.0482901	0.101098
ENSMUSG00000002227	Mov10	40.9226	90.8713	90.8713	56.8016	83.2381	49.9883	92.2687	72.1374	0.0506845	0.393412	0.128833	0.89749	0.931091
ENSMUSG00000002233	Rhoc	176.145	361.738	361.738	256.842	145.314	99.9766	130.396	218.878	0.847797	0.376495	2.25181	0.0243341	0.0587799
ENSMUSG00000002250	Ppard	31.1368	26.2129	26.2129	10.7017	15.519	32.8281	25.9267	24.0769	0.340781	0.485986	0.701217	0.483168	0.596969
ENSMUSG00000002257	Def6	136.112	192.228	192.228	174.521	122.036	95.5	108.282	145.844	0.445118	0.293507	1.51655	0.129381	0.21893
ENSMUSG00000002279	Lmf1	148.567	13.9802	13.9802	102.078	146.725	158.918	153.273	105.36	-0.953413	0.583549	-1.63382	0.102297	0.182057
ENSMUSG00000002280	Narfl	162.801	33.203	33.203	97.1389	142.492	99.2305	140.309	101.197	-0.534552	0.498996	-1.07126	0.284055	0.401141
ENSMUSG00000002289	Angptl4	94.2999	15.7277	15.7277	55.9784	165.771	210.398	173.862	104.538	-1.45722	0.558862	-2.60748	0.00912106	0.0271814
ENSMUSG00000002297	Dbf4	77.3971	71.6485	71.6485	68.3265	107.222	122.359	93.0313	87.3762	-0.388255	0.298513	-1.30063	0.193385	0.297918
ENSMUSG00000002307	Daxx	182.372	179.995	179.995	319.406	308.263	148.473	257.742	225.178	-0.491201	0.295296	-1.66342	0.0962278	0.173275
ENSMUSG00000002308	Cd320	10.6755	103.104	103.104	31.282	22.573	39.543	25.1642	47.9208	1.01625	0.563747	1.80267	0.0714397	0.137605
ENSMUSG00000002319	Ipo4	283.789	66.4059	66.4059	176.167	191.871	243.227	193.688	174.508	-0.458285	0.457739	-1.00119	0.316733	0.434275
ENSMUSG00000002320	Tm9sf1	258.88	122.327	122.327	331.754	214.444	224.574	282.907	222.459	-0.599521	0.329575	-1.81907	0.0689007	0.133927
ENSMUSG00000002325	Irf9	271.335	295.332	295.332	261.781	297.682	252.18	375.938	292.797	-0.0483121	0.211138	-0.228817	0.819011	0.872785
ENSMUSG00000002326	Gmpr2	233.971	169.51	169.51	293.886	245.482	211.145	228.003	221.644	-0.336671	0.230429	-1.46107	0.143998	0.237575
ENSMUSG00000002329	Mdp1	100.527	148.54	148.54	144.062	124.857	108.184	115.145	127.122	0.0912125	0.256637	0.355414	0.722279	0.801234
ENSMUSG00000002332	Dhrs1	257.99	97.8614	97.8614	349.865	340.007	318.582	382.801	263.567	-1.10612	0.349823	-3.16192	0.0015673	0.00663128
ENSMUSG00000002342	Tmem161a	98.748	85.6287	85.6287	117.719	65.6029	69.3867	78.5428	85.8939	0.120651	0.309933	0.389282	0.697067	0.781206
ENSMUSG00000002343	Armc6	8.0066	47.1832	47.1832	27.166	12.6973	19.3984	9.15061	24.3979	0.761419	0.581344	1.30976	0.190278	0.294453
ENSMUSG00000002345	Borcs8	56.9358	89.1237	89.1237	46.0998	45.1461	70.1328	57.9539	64.9308	0.471032	0.331146	1.42243	0.154902	0.251306
ENSMUSG00000002365	Snx9	467.051	553.965	553.965	898.947	684.951	660.293	629.105	635.468	-0.446131	0.191107	-2.33446	0.0195718	0.0494309
ENSMUSG00000002372	Ranbp3	169.918	235.916	235.916	197.571	213.739	180.555	263.08	213.813	-0.00676879	0.237042	-0.0285553	0.977219	0.984213
ENSMUSG00000002379	Ndufa11	315.816	789.881	789.881	284.831	297.682	286.5	293.582	436.882	1.05848	0.311172	3.40158	0.000669968	0.00333551
ENSMUSG00000002393	Nr2f6	75.6179	185.238	185.238	100.432	90.9976	99.9766	90.7436	118.32	0.58548	0.343598	1.70397	0.0883869	0.16222
ENSMUSG00000002395	Use1	357.628	471.832	471.832	249.433	236.312	197.715	200.551	312.186	0.947983	0.199707	4.74688	2.06583e-06	2.72455e-05
ENSMUSG00000002396	Ocel1	201.055	221.936	221.936	80.6747	79.0057	104.453	102.944	144.572	1.19316	0.22256	5.36108	8.27238e-08	1.75558e-06
ENSMUSG00000002413	Braf	459.045	396.688	396.688	118.542	221.498	233.527	217.327	291.902	1.03757	0.268767	3.86049	0.000113159	0.000776298
ENSMUSG00000002416	Ndufb2	392.323	980.361	980.361	134.183	137.555	179.809	153.273	422.552	2.23816	0.323832	6.91148	4.79629e-12	4.0079e-10
ENSMUSG00000002428	Hltf	120.099	48.9307	48.9307	186.046	227.847	161.156	173.099	138.015	-1.24088	0.360941	-3.43789	0.000586265	0.00301186
ENSMUSG00000002455	Prpf6	191.269	209.703	209.703	218.151	228.552	205.922	274.518	219.688	-0.187267	0.195912	-0.955873	0.339136	0.456852
ENSMUSG00000002458	Rgs19	279.341	293.584	293.584	462.645	363.285	416.32	438.467	363.889	-0.534413	0.166147	-3.2165	0.00129764	0.00570942
ENSMUSG00000002477	Snrpd1	134.333	298.827	298.827	140.769	173.53	175.332	175.387	199.572	0.515968	0.311741	1.65512	0.0979008	0.175843
ENSMUSG00000002486	Tchp	51.5981	120.579	120.579	56.8016	27.5109	44.7656	48.8033	67.234	1.01904	0.406051	2.50963	0.0120857	0.0341227
ENSMUSG00000002489	Tiam1	212.62	179.995	179.995	126.775	131.206	182.793	138.022	164.486	0.39314	0.231427	1.69876	0.089364	0.163615
ENSMUSG00000002496	Tsc2	198.386	41.9406	41.9406	324.345	225.73	249.195	267.655	192.742	-1.29095	0.469728	-2.74829	0.00599066	0.0193583
ENSMUSG00000002504	Slc9a3r2	5.33773	54.1732	54.1732	357.274	28.2163	16.4141	44.228	79.9738	-0.987484	0.671679	-1.47017	0.141515	0.234361
ENSMUSG00000002524	Puf60	528.435	457.851	457.851	605.06	543.164	517.789	501.759	515.987	-0.16453	0.15419	-1.06706	0.285946	0.402975
ENSMUSG00000002546	Golga2	201.055	118.832	118.832	246.963	176.352	159.664	166.999	169.814	-0.328754	0.295673	-1.11189	0.266187	0.38189
ENSMUSG00000002550	Uck1	112.982	69.901	69.901	118.542	93.1138	121.613	85.4057	95.9227	-0.278784	0.305301	-0.913144	0.361167	0.479107
ENSMUSG00000002565	Scin	0.889622	0	0	0	4.23245	33.5742	9.91317	6.94421	-1.36262	0.68367	-1.99309	0.0462516	0.0977295
ENSMUSG00000002580	Mien1	208.172	377.465	377.465	181.106	154.484	176.824	192.163	238.24	0.826939	0.264676	3.12435	0.00178198	0.007367
ENSMUSG00000002602	Axl	296.244	122.327	122.327	500.512	765.367	482.723	734.337	431.977	-1.65236	0.350071	-4.72007	2.35765e-06	3.05295e-05
ENSMUSG00000002603	Tgfb1	438.584	328.535	328.535	319.406	386.563	528.98	483.457	402.009	-0.223	0.242297	-0.920356	0.357387	0.475094
ENSMUSG00000002608	Ccdc97	106.755	213.198	213.198	191.808	132.617	143.25	120.483	160.187	0.249478	0.318954	0.782173	0.434113	0.55002
ENSMUSG00000002617	Zfp40	19.5717	0	0	81.4979	20.4568	29.8437	23.6391	25.0013	-1.39801	0.690135	-2.02571	0.0427944	0.0919134
ENSMUSG00000002625	Akap8l	257.101	239.411	239.411	142.416	154.484	140.266	129.634	186.103	0.780818	0.180999	4.31394	1.6037e-05	0.000154673
ENSMUSG00000002635	Pdcd2l	241.088	262.129	262.129	156.41	157.306	157.426	145.647	197.448	0.711644	0.171154	4.15791	3.21175e-05	0.000275927
ENSMUSG00000002658	Gtf2f1	258.88	300.574	300.574	321.876	312.496	302.168	286.719	297.612	-0.0981022	0.161305	-0.608179	0.543069	0.651414
ENSMUSG00000002660	Clpp	84.5141	160.772	160.772	86.4372	83.9435	70.8789	105.995	107.616	0.593945	0.31814	1.86693	0.0619119	0.122772
ENSMUSG00000002661	Alkbh7	38.2537	15.7277	15.7277	55.1552	35.9758	47.0039	27.4518	33.6137	-0.686906	0.468778	-1.46531	0.142836	0.235986
ENSMUSG00000002668	Dennd1c	191.269	108.346	108.346	164.642	188.344	134.297	170.049	152.185	-0.245951	0.290054	-0.847946	0.396468	0.51302
ENSMUSG00000002679	Med6	72.949	90.8713	90.8713	71.6194	95.23	102.961	82.3555	86.6939	-0.0616802	0.271032	-0.227575	0.819977	0.873379
ENSMUSG00000002699	Lcp2	691.236	585.421	585.421	987.03	1136.41	781.906	995.892	823.331	-0.638185	0.182689	-3.49328	0.000477121	0.00254655
ENSMUSG00000002718	Cse1l	303.361	221.936	221.936	327.638	354.115	390.207	367.55	312.392	-0.510058	0.196094	-2.60109	0.00929292	0.0276103
ENSMUSG00000002728	Naa20	344.284	571.44	571.44	367.152	281.458	358.871	342.386	405.29	0.53344	0.238666	2.23509	0.0254116	0.0607381
ENSMUSG00000002731	Prkra	87.1829	164.267	164.267	85.614	74.7732	73.1172	80.0679	104.184	0.768834	0.30258	2.54093	0.0110559	0.0317461
ENSMUSG00000002732	Fkbp7	14.2339	5.24257	5.24257	41.9838	33.8596	32.8281	41.9403	25.0473	-1.78872	0.48709	-3.67227	0.000240409	0.00145188
ENSMUSG00000002733	Plekha3	167.249	87.3762	87.3762	186.046	202.452	240.988	267.655	177.02	-0.90929	0.306679	-2.96496	0.00302724	0.0111962
ENSMUSG00000002741	Ykt6	267.776	293.584	293.584	497.22	344.239	324.551	411.778	347.533	-0.459265	0.213858	-2.14752	0.0317522	0.0723369
ENSMUSG00000002748	Baz1b	324.712	433.386	433.386	353.981	395.734	384.984	333.235	379.917	0.105293	0.184661	0.570195	0.568546	0.67344
ENSMUSG00000002763	Pex6	151.236	213.198	213.198	125.951	129.09	94.7539	138.022	152.207	0.628769	0.251537	2.49971	0.0124295	0.0348506
ENSMUSG00000002767	Mrpl2	135.223	237.663	237.663	143.239	163.655	182.793	183.775	183.43	0.252441	0.269988	0.935007	0.349785	0.467487
ENSMUSG00000002768	Mea1	266.887	242.906	242.906	146.532	169.298	155.187	152.51	196.604	0.678753	0.176929	3.8363	0.000124901	0.000841805
ENSMUSG00000002778	Kdelr1	95.1895	82.1336	82.1336	212.389	157.306	152.203	208.939	141.47	-1.03425	0.251626	-4.11028	3.95183e-05	0.000326652
ENSMUSG00000002781	Tmem143	21.3509	47.1832	47.1832	15.641	4.23245	13.4297	15.251	23.4673	1.37399	0.52743	2.60506	0.00918587	0.0273454
ENSMUSG00000002797	Ggct	32.0264	80.3861	80.3861	12.3482	8.46489	11.1914	11.4383	33.7488	2.24203	0.456359	4.91286	8.97559e-07	1.34766e-05
ENSMUSG00000002799	Jag2	25.799	26.2129	26.2129	15.641	13.4027	23.1289	19.0638	21.3516	0.491621	0.430059	1.14315	0.252977	0.367075
ENSMUSG00000002803	Btbd6	27.5783	31.4554	31.4554	30.4588	28.9217	24.6211	20.5889	27.8685	0.182035	0.384901	0.472941	0.636255	0.731683
ENSMUSG00000002804	Nudt14	90.7414	195.723	195.723	69.1498	38.092	44.0195	46.5156	97.1377	1.56718	0.36859	4.25183	2.12035e-05	0.000195007
ENSMUSG00000002812	Flii	924.317	297.079	297.079	1254.57	1047.53	902.027	1008.86	818.78	-0.970173	0.375094	-2.58648	0.00969609	0.0286174
ENSMUSG00000002814	Top3a	96.0792	193.975	193.975	115.25	58.5488	69.3867	73.9675	114.455	0.945527	0.360067	2.62597	0.00864016	0.0260398
ENSMUSG00000002820	Atg4d	147.677	117.084	117.084	107.841	74.7732	67.8945	64.0543	99.4869	0.671564	0.290832	2.30911	0.0209375	0.0521659
ENSMUSG00000002825	Qtrt1	32.916	155.53	155.53	37.0445	26.1001	29.0977	47.2782	69.0708	1.46702	0.488046	3.00591	0.00264792	0.0100504
ENSMUSG00000002833	Hdgfrp2	201.944	50.6782	50.6782	124.305	98.7571	84.3086	105.232	102.272	-0.0100774	0.464506	-0.021695	0.982691	0.987863
ENSMUSG00000002835	Chaf1a	13.3443	5.24257	5.24257	28.8124	47.2623	36.5586	41.9403	25.4862	-1.86316	0.492889	-3.78009	0.000156774	0.00101957
ENSMUSG00000002844	Adprh	402.109	655.322	655.322	516.154	478.972	411.098	446.855	509.404	0.288764	0.225584	1.28007	0.200519	0.306831
ENSMUSG00000002845	Tmem39a	63.1631	62.9109	62.9109	46.0998	37.3866	50.7344	72.4424	56.5212	0.268927	0.339092	0.793079	0.427732	0.543747
ENSMUSG00000002846	Timmdc1	25.799	20.9703	20.9703	13.9946	16.2244	22.3828	9.91317	18.6078	0.469739	0.472781	0.993566	0.320434	0.438338
ENSMUSG00000002870	Mcm2	130.774	22.7178	22.7178	107.017	135.438	115.645	173.862	101.167	-0.962862	0.519202	-1.8545	0.0636673	0.125481
ENSMUSG00000002871	Tpra1	599.605	325.039	325.039	359.743	325.193	320.074	317.984	367.525	0.327733	0.26191	1.25132	0.210817	0.319484
ENSMUSG00000002881	Nab1	411.895	634.351	634.351	618.232	663.083	572.254	624.529	594.099	-0.147516	0.203286	-0.725659	0.468048	0.582731
ENSMUSG00000002885	Adgre5	847.81	849.297	849.297	2973.44	996.741	803.543	887.61	1172.53	-0.66868	0.406712	-1.64411	0.100153	0.178957
ENSMUSG00000002897	Il17ra	789.984	1031.04	1031.04	730.188	727.981	673.723	743.487	818.206	0.39467	0.157288	2.50922	0.0120998	0.0341227
ENSMUSG00000002910	Arrdc2	92.5207	24.4653	24.4653	75.7354	26.1001	29.0977	35.0774	43.9231	0.170541	0.542418	0.314408	0.753211	0.824347
ENSMUSG00000002944	Cd36	1797.04	917.45	917.45	6346.14	3076.99	2225.6	3102.82	2626.21	-1.48652	0.366097	-4.06046	4.89753e-05	0.00038776
ENSMUSG00000002948	Map2k7	61.3839	92.6188	92.6188	61.7409	52.2002	94.7539	73.2049	75.503	0.197085	0.332375	0.592961	0.553207	0.659802
ENSMUSG00000002949	Timm44	236.639	176.5	176.5	137.476	148.841	114.898	148.697	162.793	0.510526	0.229235	2.22709	0.0259414	0.0616325
ENSMUSG00000002957	Ap2a2	1055.09	816.094	816.094	1417.57	904.333	816.226	877.696	957.586	-0.157668	0.242159	-0.651093	0.514987	0.626299
ENSMUSG00000002963	Pnkp	183.262	244.653	244.653	233.792	197.514	211.145	226.478	220.214	0.0355197	0.201431	0.176337	0.86003	0.902437
ENSMUSG00000002968	Med25	202.834	139.802	139.802	167.935	198.925	130.566	221.902	171.681	-0.145694	0.278849	-0.522484	0.601334	0.701173
ENSMUSG00000002980	Bcam	2.66887	0	0	4.93927	4.93785	0	2.28765	2.11909	-0.471521	0.65027	-0.725115	0.468381	0.58301
ENSMUSG00000002981	Clptm1	540.89	351.252	351.252	789.46	926.906	956.492	1095.79	716.005	-1.14717	0.22341	-5.1348	2.82446e-07	5.00172e-06
ENSMUSG00000002983	Relb	450.149	534.742	534.742	252.726	317.433	258.148	324.084	381.718	0.796164	0.184151	4.32342	1.53631e-05	0.000150067
ENSMUSG00000002984	Tomm40	228.633	412.416	412.416	140.769	148.841	187.27	189.875	245.746	1.02541	0.275823	3.71765	0.000201087	0.00124903
ENSMUSG00000002985	Apoe	87672.2	88872.1	88872.1	44932.5	68191.8	75276.4	70097.5	74844.9	0.443855	0.198383	2.23736	0.0252628	0.0604905
ENSMUSG00000002996	Hbp1	709.918	531.247	531.247	1097.34	986.16	896.805	951.664	814.912	-0.717464	0.175493	-4.08828	4.34593e-05	0.000352954
ENSMUSG00000002997	Prkar2b	123.657	76.8911	76.8911	204.98	211.622	184.285	225.715	157.72	-1.09622	0.258141	-4.24659	2.17045e-05	0.000198805
ENSMUSG00000003031	Cdkn1b	181.483	139.802	139.802	111.957	169.298	211.891	195.213	164.206	-0.150433	0.286347	-0.525351	0.599339	0.699611
ENSMUSG00000003032	Klf4	385.206	674.544	674.544	467.584	637.689	952.762	723.661	645.141	-0.256956	0.296865	-0.865564	0.386729	0.504262
ENSMUSG00000003033	Ap1m1	406.557	419.406	419.406	596.828	402.788	346.934	384.326	425.178	-0.0580933	0.231838	-0.250577	0.802141	0.860466
ENSMUSG00000003037	Rab8a	647.645	609.886	609.886	777.112	804.87	725.949	825.843	714.456	-0.327157	0.126989	-2.57627	0.00998712	0.0292842
ENSMUSG00000003038	Hmgn2	428.798	506.782	506.782	405.843	574.907	474.516	606.228	500.551	-0.100973	0.20326	-0.496769	0.619352	0.717257
ENSMUSG00000003039	Fam32a	428.798	246.401	246.401	333.401	388.68	373.793	375.938	341.916	-0.242735	0.249093	-0.974475	0.329821	0.447743
ENSMUSG00000003062	Stard3nl	452.817	571.44	571.44	504.629	482.499	453.625	526.16	508.944	0.10676	0.162557	0.656755	0.511339	0.62328
ENSMUSG00000003068	Stk11	109.423	104.851	104.851	74.9122	106.517	76.1016	76.2551	93.2731	0.337996	0.260528	1.29735	0.19451	0.299221
ENSMUSG00000003072	Atp5d	730.379	1041.52	1041.52	553.198	685.656	620.004	610.804	754.727	0.58846	0.188996	3.11361	0.00184813	0.00759811
ENSMUSG00000003099	Ppp5c	151.236	31.4554	31.4554	149.001	122.741	149.219	138.784	110.556	-0.815768	0.483967	-1.68558	0.0918759	0.166928
ENSMUSG00000003119	Cdk12	230.412	429.891	429.891	100.432	188.344	211.145	116.67	243.826	1.15296	0.344676	3.34507	0.00082263	0.00394567
ENSMUSG00000003123	Lipe	32.916	40.1931	40.1931	63.3873	47.9677	47.0039	48.8033	45.7806	-0.440245	0.328297	-1.341	0.179922	0.28197
ENSMUSG00000003131	Pafah1b2	411.895	176.5	176.5	595.182	614.41	517.789	552.087	434.909	-1.08838	0.314451	-3.46121	0.000537761	0.00280443
ENSMUSG00000003134	Tbc1d8	115.651	29.7079	29.7079	60.9176	124.152	102.961	118.958	83.1507	-0.669236	0.484339	-1.38175	0.167048	0.266042
ENSMUSG00000003135	Cnot11	86.2933	75.1435	75.1435	119.366	92.4084	133.551	110.57	98.925	-0.504196	0.258544	-1.95013	0.0511604	0.105987
ENSMUSG00000003154	Foxj2	116.54	96.1138	96.1138	158.057	199.63	208.906	178.437	150.543	-0.822415	0.227331	-3.6177	0.000297238	0.00172318
ENSMUSG00000003161	Sri	762.406	807.356	807.356	756.531	814.746	947.539	832.706	818.377	-0.0810771	0.14086	-0.575585	0.564896	0.669859
ENSMUSG00000003166	Dgcr2	100.527	43.6881	43.6881	163.819	156.601	111.168	147.172	109.523	-1.09364	0.361088	-3.02874	0.00245579	0.00948616
ENSMUSG00000003184	Irf3	198.386	417.658	417.658	119.366	133.322	117.883	125.821	218.585	1.39789	0.295825	4.72538	2.2968e-06	2.99115e-05
ENSMUSG00000003190	Bcl2l12	28.4679	34.9505	34.9505	19.7571	35.2704	22.3828	39.6527	30.776	0.137419	0.418894	0.328051	0.742873	0.817022
ENSMUSG00000003198	Zfp959	10.6755	5.24257	5.24257	41.1606	34.565	38.0508	34.3148	24.1788	-1.99255	0.471724	-4.22398	2.40024e-05	0.000217199
ENSMUSG00000003199	Mpnd	282.9	279.604	279.604	298.826	203.863	227.559	207.414	254.253	0.255222	0.210892	1.2102	0.226201	0.337566
ENSMUSG00000003200	Sh3gl1	452.817	657.069	657.069	513.684	366.812	401.398	324.084	481.848	0.533761	0.236367	2.25819	0.0239339	0.0581027
ENSMUSG00000003206	Ebi3	56.0462	20.9703	20.9703	24.6963	87.4706	41.0352	93.7938	49.2832	-0.741028	0.526988	-1.40616	0.159677	0.257642
ENSMUSG00000003208	Ccdc94	36.4745	101.356	101.356	24.6963	14.8136	26.1133	37.365	48.8822	1.41751	0.462749	3.06324	0.00218957	0.00867152
ENSMUSG00000003226	Ranbp2	867.381	765.416	765.416	636.342	608.061	666.262	574.964	697.692	0.362717	0.136803	2.65139	0.00801614	0.0244764
ENSMUSG00000003228	Grk5	22.2405	12.2327	12.2327	39.5141	35.9758	25.3672	33.5523	25.8736	-0.941028	0.442688	-2.12571	0.033527	0.075687
ENSMUSG00000003233	Dvl3	35.5849	38.4455	38.4455	80.6747	67.7191	61.1797	64.0543	55.1577	-0.828991	0.304899	-2.71891	0.00654976	0.0207736
ENSMUSG00000003234	Abcf3	227.743	160.772	160.772	232.146	177.763	214.875	247.829	203.129	-0.234172	0.237471	-0.986107	0.324081	0.441744
ENSMUSG00000003235	Eif2b5	246.425	26.2129	26.2129	210.742	211.622	167.125	185.3	153.377	-0.752157	0.563118	-1.3357	0.181647	0.284133
ENSMUSG00000003269	Cyth2	217.957	258.634	258.634	272.483	165.065	179.062	170.811	217.521	0.303276	0.252931	1.19905	0.230509	0.341627
ENSMUSG00000003283	Hck	719.704	302.322	302.322	551.552	1052.47	837.863	1084.35	692.94	-0.924306	0.35516	-2.60251	0.00925443	0.0275178
ENSMUSG00000003299	Mrpl4	355.849	379.213	379.213	345.749	360.463	305.898	369.837	356.603	0.100856	0.156205	0.645667	0.518495	0.629329
ENSMUSG00000003308	Keap1	157.463	90.8713	90.8713	245.317	195.398	140.266	183.012	157.6	-0.701824	0.311157	-2.25553	0.0240998	0.0583723
ENSMUSG00000003316	Glg1	381.648	391.445	391.445	1023.25	1132.88	1019.91	1156.79	785.339	-1.46821	0.133347	-11.0104	3.40321e-28	3.64008e-25
ENSMUSG00000003344	Btbd2	86.2933	22.7178	22.7178	58.448	78.3003	56.7031	82.3555	58.2194	-0.533802	0.480401	-1.11116	0.266499	0.382204
ENSMUSG00000003345	Csnk1g2	307.809	139.802	139.802	293.886	252.536	292.469	230.29	236.656	-0.412407	0.319216	-1.29194	0.196379	0.301759
ENSMUSG00000003346	Abhd17a	287.348	356.495	356.495	287.301	254.652	274.562	276.044	298.985	0.276955	0.171116	1.61852	0.105551	0.186793
ENSMUSG00000003348	Mob3a	91.631	10.4851	10.4851	158.057	140.376	129.074	125.821	95.1327	-1.47439	0.558396	-2.64039	0.00828098	0.0251557
ENSMUSG00000003360	Ddx23	51.5981	92.6188	92.6188	38.6909	28.2163	31.3359	26.6893	51.6812	1.23016	0.358702	3.42949	0.000604726	0.00308595
ENSMUSG00000003363	Pld3	2017.66	1478.41	1478.41	3298.61	2110.58	2339	2357.05	2154.24	-0.591209	0.216165	-2.73499	0.00623817	0.020019
ENSMUSG00000003380	Rabac1	632.521	1391.03	1391.03	840.499	572.791	640.894	667.232	876.571	0.706448	0.293304	2.40859	0.0160144	0.0421502
ENSMUSG00000003382	Etv3	1471.43	926.188	926.188	513.684	703.292	664.023	586.402	827.316	0.823843	0.229961	3.58254	0.000340272	0.00192467
ENSMUSG00000003402	Prkcsh	203.723	104.851	104.851	312.82	247.598	221.59	229.528	203.566	-0.816639	0.303626	-2.68962	0.0071533	0.0222936
ENSMUSG00000003418	St8sia6	4.44811	6.9901	6.9901	10.7017	21.1622	17.9062	30.502	14.1001	-1.37314	0.565852	-2.42667	0.0152379	0.0405839
ENSMUSG00000003420	Fcgrt	999.935	1508.11	1508.11	2390.61	858.481	1237.77	983.691	1355.24	-0.0293089	0.346238	-0.0846495	0.93254	0.953854
ENSMUSG00000003421	Nosip	181.483	204.46	204.46	223.09	256.063	179.809	171.574	202.991	-0.0789336	0.228492	-0.345454	0.729753	0.807431
ENSMUSG00000003423	Pih1d1	161.911	181.743	181.743	113.603	135.438	107.437	134.209	145.155	0.496363	0.212016	2.34115	0.0192243	0.0486336
ENSMUSG00000003429	Rps11	1467.88	1815.68	1815.68	1049.59	1320.52	1381.77	1278.8	1447.13	0.42683	0.165242	2.58306	0.0097928	0.0288312
ENSMUSG00000003435	Supt5	416.343	288.341	288.341	499.689	537.521	473.023	430.841	419.157	-0.531387	0.205812	-2.5819	0.00982573	0.0289123
ENSMUSG00000003437	Paf1	614.729	113.589	113.589	355.627	419.012	470.785	402.627	355.708	-0.472551	0.480441	-0.983579	0.325323	0.442817
ENSMUSG00000003438	Timm50	187.71	228.926	228.926	201.687	179.174	193.238	225.715	206.482	0.0968953	0.196469	0.493183	0.621884	0.71941
ENSMUSG00000003444	Med29	99.6376	139.802	139.802	66.6801	68.4246	73.8633	100.657	98.4095	0.667568	0.284967	2.34262	0.019149	0.0484774
ENSMUSG00000003458	Ncstn	672.554	197.47	197.47	1451.32	1242.22	1035.58	1200.26	856.696	-1.63179	0.391584	-4.16714	3.08439e-05	0.000266698
ENSMUSG00000003464	Pex19	165.47	230.673	230.673	223.913	200.336	252.18	262.318	223.652	-0.172554	0.22185	-0.777793	0.436691	0.552294
ENSMUSG00000003484	Cyp4f18	588.93	468.336	468.336	325.168	589.721	460.34	587.164	498.285	0.0518419	0.253215	0.204735	0.837779	0.886514
ENSMUSG00000003500	Impdh1	306.92	150.287	150.287	258.488	248.304	291.723	217.327	231.905	-0.298916	0.303822	-0.983854	0.325187	0.442801
ENSMUSG00000003518	Dusp3	438.584	592.411	592.411	587.773	413.369	499.137	379.751	500.491	0.195054	0.225203	0.866124	0.386422	0.504107
ENSMUSG00000003526	Prodh	23.1302	0	0	13.9946	16.2244	14.1758	22.8765	12.9145	-0.568123	0.6976	-0.814397	0.415418	0.531814
ENSMUSG00000003527	Dgcr14	104.975	10.4851	10.4851	116.896	81.8273	60.4336	77.7802	66.1261	-0.746004	0.593409	-1.25715	0.208699	0.316945
ENSMUSG00000003528	Slc25a1	208.172	104.851	104.851	216.505	166.476	171.602	179.2	164.522	-0.361083	0.307563	-1.17401	0.24039	0.352559
ENSMUSG00000003531	Dgcr6	73.8386	87.3762	87.3762	101.255	52.9056	41.7812	45.7531	70.0408	0.417185	0.382414	1.09093	0.275305	0.391734
ENSMUSG00000003541	Ier3	4082.47	5599.07	5599.07	4967.26	4179.54	5401.72	4163.53	4856.09	0.120092	0.183671	0.653843	0.513213	0.624924
ENSMUSG00000003545	Fosb	322.043	681.534	681.534	207.449	483.91	585.684	480.407	491.795	0.325068	0.370881	0.876474	0.380772	0.498621
ENSMUSG00000003546	Klc4	248.204	186.985	186.985	410.782	170.709	211.145	195.213	230.003	-0.232035	0.338802	-0.68487	0.493426	0.606555
ENSMUSG00000003549	Ercc1	67.6113	234.168	234.168	96.3157	105.811	52.9727	73.2049	123.465	0.996112	0.431844	2.30665	0.0210744	0.0524214
ENSMUSG00000003559	As3mt	142.339	10.4851	10.4851	190.162	151.663	119.375	141.072	109.369	-1.08734	0.601847	-1.80667	0.070814	0.136621
ENSMUSG00000003573	Homer3	119.209	106.599	106.599	59.2712	53.611	73.8633	52.616	81.6813	0.860521	0.264897	3.24851	0.00116011	0.00522466
ENSMUSG00000003581	Rnf215	222.405	178.247	178.247	128.421	107.927	71.625	72.4424	137.045	0.978159	0.295186	3.3137	0.000920688	0.00432323
ENSMUSG00000003604	Aven	46.2603	87.3762	87.3762	72.4426	28.2163	79.832	75.4926	68.1423	0.172883	0.426379	0.405468	0.685133	0.77142
ENSMUSG00000003617	Cp	46.2603	12.2327	12.2327	149.001	90.9976	32.082	121.246	66.2932	-1.63504	0.546185	-2.99356	0.00275739	0.0103703
ENSMUSG00000003623	Crot	193.938	76.8911	76.8911	302.942	193.987	143.996	229.528	174.025	-0.816135	0.393087	-2.07622	0.0378735	0.0835076
ENSMUSG00000003644	Rps6ka1	389.654	178.247	178.247	618.232	584.783	473.769	689.346	444.611	-1.1751	0.31081	-3.78076	0.000156351	0.00101847
ENSMUSG00000003660	Snrnp200	188.6	143.297	143.297	344.926	276.52	378.269	308.071	254.711	-1.00795	0.218481	-4.61342	3.96093e-06	4.79066e-05
ENSMUSG00000003662	Ciao1	177.035	12.2327	12.2327	117.719	129.09	122.359	173.862	106.361	-0.743002	0.608933	-1.22017	0.222401	0.333726
ENSMUSG00000003665	Has1	30.2471	94.3663	94.3663	12.3482	4.23245	16.4141	8.38806	37.1946	2.32842	0.528268	4.40766	1.04495e-05	0.000108935
ENSMUSG00000003680	Taf6l	501.747	608.138	608.138	405.843	481.088	552.109	582.589	534.236	0.173781	0.192986	0.900485	0.367862	0.486001
ENSMUSG00000003721	Insig2	106.755	218.441	218.441	153.117	191.871	149.965	180.725	174.188	0.0852253	0.301772	0.282416	0.777625	0.842411
ENSMUSG00000003731	Kpna6	109.423	117.084	117.084	100.432	131.206	114.898	117.433	115.366	-0.022538	0.224243	-0.100507	0.919942	0.945347
ENSMUSG00000003746	Man1a	1351.34	1696.85	1696.85	1080.05	820.389	811.004	751.113	1172.51	0.852525	0.188868	4.51386	6.36574e-06	7.14459e-05
ENSMUSG00000003752	Itpkc	117.43	13.9802	13.9802	64.2105	50.0839	68.6406	45.7531	53.4398	-0.165652	0.582933	-0.284171	0.77628	0.841501
ENSMUSG00000003762	Coq8b	122.768	132.812	132.812	139.123	109.338	88.7851	100.657	118.042	0.232103	0.252219	0.920242	0.357446	0.475115
ENSMUSG00000003778	Brd8	520.429	401.931	401.931	167.935	265.233	214.129	229.528	314.445	0.985844	0.225576	4.37034	1.24051e-05	0.000125411
ENSMUSG00000003779	Kif20a	32.916	0	0	63.3873	65.6029	51.4805	54.9037	38.3272	-1.40252	0.682444	-2.05514	0.0398651	0.0870375
ENSMUSG00000003808	Farsa	240.198	132.812	132.812	221.444	177.057	141.758	140.309	169.484	-0.00107667	0.311971	-0.0034512	0.997246	0.998388
ENSMUSG00000003809	Gcdh	45.3707	13.9802	13.9802	75.7354	38.7974	47.0039	41.9403	39.544	-0.861228	0.494625	-1.74118	0.0816529	0.152823
ENSMUSG00000003810	Mast2	112.092	143.297	143.297	166.289	174.941	175.332	155.56	152.973	-0.343331	0.209407	-1.63954	0.101101	0.180399
ENSMUSG00000003812	Dnase2a	547.117	622.119	622.119	360.567	312.496	282.023	272.231	431.239	0.943772	0.173761	5.43143	5.59048e-08	1.26955e-06
ENSMUSG00000003813	Rad23a	306.03	344.262	344.262	247.787	272.287	281.277	272.231	295.448	0.295856	0.157976	1.87279	0.0610968	0.12167
ENSMUSG00000003814	Calr	1941.15	1635.68	1635.68	2327.22	2477.39	3312.66	2721.55	2293.05	-0.629867	0.175594	-3.58706	0.000334433	0.00189365
ENSMUSG00000003824	Syce2	39.1434	36.698	36.698	29.6356	45.1461	44.7656	61.0041	41.8701	-0.2443	0.374318	-0.652654	0.51398	0.625572
ENSMUSG00000003847	Nfat5	707.249	1144.63	1144.63	162.173	246.893	326.789	332.472	580.69	1.81105	0.297869	6.08002	1.20171e-09	4.74298e-08
ENSMUSG00000003848	Nob1	89.8518	61.1633	61.1633	132.537	114.276	85.8008	88.4559	90.464	-0.527481	0.30777	-1.71388	0.0865502	0.159776
ENSMUSG00000003865	Gys1	111.203	146.792	146.792	104.548	153.779	152.203	192.163	143.926	-0.160429	0.281258	-0.570399	0.568407	0.673351
ENSMUSG00000003868	Ruvbl2	104.086	75.1435	75.1435	92.1997	142.492	135.043	131.921	108.004	-0.527566	0.283007	-1.86414	0.0623019	0.123318
ENSMUSG00000003873	Bax	880.726	1869.85	1869.85	434.656	559.388	588.668	581.827	969.281	1.44375	0.281583	5.12725	2.94008e-07	5.16373e-06
ENSMUSG00000003882	Il7r	388.765	449.114	449.114	232.146	225.73	239.496	246.304	318.667	0.847509	0.155173	5.46171	4.71562e-08	1.09328e-06
ENSMUSG00000003923	Tfam	38.2537	80.3861	80.3861	97.1389	76.184	105.199	96.844	82.056	-0.490495	0.341375	-1.43682	0.150769	0.246202
ENSMUSG00000003929	Zfp81	17.7924	125.822	125.822	5.76248	40.9136	31.3359	18.3012	52.2499	1.43643	0.599477	2.39613	0.0165691	0.0432811
ENSMUSG00000003948	Mmd	141.45	40.1931	40.1931	84.7908	112.16	117.883	158.611	99.3257	-0.577988	0.454901	-1.27058	0.203879	0.310949
ENSMUSG00000003955	Fam162a	233.971	478.822	478.822	96.3157	196.103	200.699	202.076	269.544	1.10967	0.347896	3.18965	0.00142444	0.00614658
ENSMUSG00000003970	Rpl8	739.276	1079.97	1079.97	852.847	848.606	965.445	979.878	935.142	0.0792734	0.189212	0.418966	0.675241	0.763384
ENSMUSG00000003992	Ssbp2	94.2999	325.039	325.039	105.371	39.5028	68.6406	81.593	148.498	1.54782	0.445139	3.47716	0.000506763	0.00268048
ENSMUSG00000004018	Fancl	56.9358	40.1931	40.1931	76.5587	74.0678	81.3242	101.419	67.2417	-0.798121	0.307836	-2.59268	0.00952303	0.0281922
ENSMUSG00000004032	Gstm5	42.7018	73.396	73.396	23.8731	14.1082	21.6367	24.4016	39.0734	1.43902	0.39464	3.64641	0.000265929	0.00156891
ENSMUSG00000004040	Stat3	1333.54	807.356	807.356	2097.54	1817.13	1798.09	1630.33	1470.19	-0.874176	0.225381	-3.87866	0.000105031	0.000731867
ENSMUSG00000004043	Stat5a	108.534	83.8812	83.8812	177.814	119.214	110.422	166.999	121.535	-0.60168	0.2884	-2.08627	0.0369541	0.0819024
ENSMUSG00000004044	Ptrf	54.2669	47.1832	47.1832	279.069	62.0759	35.8125	75.4926	85.869	-0.961952	0.546969	-1.7587	0.0786292	0.148432
ENSMUSG00000004054	Map3k11	290.906	171.257	171.257	563.077	459.22	500.629	444.567	371.559	-1.16766	0.248045	-4.70745	2.50839e-06	3.22861e-05
ENSMUSG00000004056	Akt2	184.152	284.846	284.846	262.604	198.925	255.164	243.254	244.827	0.0561296	0.237704	0.236132	0.81333	0.868982
ENSMUSG00000004069	Dnaja3	168.139	40.1931	40.1931	195.924	153.073	120.121	170.049	126.813	-0.808501	0.466916	-1.73158	0.0833486	0.155297
ENSMUSG00000004070	Hmox2	444.811	363.485	363.485	594.359	477.561	502.867	539.886	469.493	-0.423981	0.171086	-2.47817	0.0132057	0.0363949
ENSMUSG00000004071	Cdip1	320.264	298.827	298.827	203.333	128.384	161.902	155.56	223.871	0.894871	0.218676	4.09221	4.27274e-05	0.000347803
ENSMUSG00000004085	Zak	144.119	235.916	235.916	168.758	148.841	140.266	139.547	173.337	0.433487	0.253208	1.71198	0.0869011	0.160202
ENSMUSG00000004096	Cwc15	407.447	676.292	676.292	407.49	477.561	435.719	459.818	505.803	0.382772	0.224593	1.70429	0.088326	0.162166
ENSMUSG00000004098	Col5a3	13.3443	24.4653	24.4653	5.76248	77.5949	49.2422	54.1411	35.5737	-0.899244	0.594829	-1.51177	0.130593	0.220319
ENSMUSG00000004099	Dnmt1	254.432	258.634	258.634	253.549	220.087	266.355	253.93	252.231	0.0489181	0.168073	0.291052	0.771011	0.837828
ENSMUSG00000004100	Ppan	156.573	122.327	122.327	59.2712	81.8273	69.3867	82.3555	99.1525	0.845493	0.260658	3.24369	0.00117993	0.00529831
ENSMUSG00000004105	Angptl2	64.9424	99.6089	99.6089	179.46	70.5408	53.7187	76.2551	92.0193	-0.101984	0.433457	-0.235279	0.813992	0.869311
ENSMUSG00000004151	Etv1	58.715	75.1435	75.1435	307.881	91.703	95.5	111.332	116.488	-0.995557	0.44514	-2.2365	0.0253189	0.0605975
ENSMUSG00000004187	Kifc2	22.2405	0	0	19.7571	4.93785	8.20703	3.0502	8.31324	-0.101261	0.697098	-0.145261	0.884505	0.921105
ENSMUSG00000004207	Psap	10432.6	7440.96	7440.96	21901.5	17906.1	19558.1	16304.1	14426.3	-1.14295	0.18789	-6.0831	1.1788e-09	4.66987e-08
ENSMUSG00000004221	Ikbkg	278.452	85.6287	85.6287	164.642	234.901	134.297	135.734	159.898	-0.131764	0.430039	-0.306401	0.759299	0.829144
ENSMUSG00000004233	Wars2	20.4613	10.4851	10.4851	23.8731	29.6271	10.4453	19.0638	17.7773	-0.453333	0.531639	-0.852708	0.393821	0.51077
ENSMUSG00000004264	Phb2	413.674	541.732	541.732	451.12	438.764	438.703	420.166	463.699	0.182227	0.165843	1.0988	0.271857	0.387963
ENSMUSG00000004266	Ptpn6	1298.85	882.5	882.5	1536.11	1652.77	1338.49	1661.6	1321.83	-0.583996	0.197337	-2.95939	0.00308251	0.0113613
ENSMUSG00000004267	Eno2	165.47	108.346	108.346	23.0499	39.5028	91.0234	61.0041	85.249	1.11384	0.439572	2.53392	0.0112793	0.0322663
ENSMUSG00000004268	Emg1	233.081	230.673	230.673	178.637	162.244	191.746	177.674	200.675	0.377224	0.174188	2.16561	0.0303411	0.069731
ENSMUSG00000004270	Lpcat3	177.035	34.9505	34.9505	352.334	285.69	349.918	343.148	225.432	-1.73031	0.471645	-3.66867	0.000243813	0.00146754
ENSMUSG00000004285	Atp6v1f	709.029	1529.08	1529.08	656.099	629.224	807.273	738.15	942.563	0.79088	0.280055	2.82401	0.00474265	0.0160479
ENSMUSG00000004317	Clcn5	109.423	174.752	174.752	172.874	154.484	189.508	175.387	164.455	-0.185687	0.248854	-0.746168	0.455566	0.570979
ENSMUSG00000004319	Clcn3	236.639	277.856	277.856	247.787	251.125	261.133	255.455	258.264	0.0491288	0.16413	0.299329	0.764689	0.832819
ENSMUSG00000004356	Utp20	77.3971	17.4752	17.4752	81.4979	110.044	105.199	94.5564	71.9492	-1.15669	0.484764	-2.38609	0.0170284	0.0441363
ENSMUSG00000004359	Spic	50.7084	52.4257	52.4257	15.641	11.2865	40.2891	25.9267	35.529	1.00594	0.469471	2.1427	0.0321372	0.0730582
ENSMUSG00000004364	Cul3	85.4037	155.53	155.53	176.167	553.745	390.207	667.232	311.974	-1.59565	0.409506	-3.89651	9.75891e-05	0.000691725
ENSMUSG00000004393	Ddx56	157.463	17.4752	17.4752	167.112	117.098	126.836	137.259	105.817	-0.851212	0.56673	-1.50197	0.133105	0.223499
ENSMUSG00000004394	Tmed4	290.906	61.1633	61.1633	356.451	376.688	334.996	411.778	270.449	-1.23576	0.461054	-2.6803	0.0073557	0.0228379
ENSMUSG00000004446	Bid	85.4037	104.851	104.851	177.814	114.276	111.914	170.049	124.166	-0.526962	0.286562	-1.83891	0.0659282	0.129128
ENSMUSG00000004451	Ralb	568.468	380.96	380.96	656.923	711.051	584.937	719.086	571.769	-0.570979	0.20808	-2.74404	0.0060689	0.0195757
ENSMUSG00000004455	Ppp1cc	559.572	562.703	562.703	911.295	644.743	744.601	718.323	671.991	-0.419498	0.171296	-2.44897	0.0143267	0.0386057
ENSMUSG00000004460	Dnajb11	548.897	307.564	307.564	658.569	617.232	660.293	675.62	539.391	-0.719245	0.244161	-2.94578	0.00322144	0.0117679
ENSMUSG00000004462	Tbccd1	60.4943	12.2327	12.2327	82.3211	63.4867	135.789	64.0543	61.5158	-1.29026	0.531472	-2.4277	0.0151947	0.0405193
ENSMUSG00000004500	Zfp324	22.2405	1.74752	1.74752	16.4642	10.5811	16.4141	16.7761	12.2816	-0.489001	0.657049	-0.744239	0.456732	0.572188
ENSMUSG00000004508	Gab2	457.266	276.109	276.109	316.936	425.361	377.523	433.129	366.062	-0.192212	0.251613	-0.763919	0.444916	0.560356
ENSMUSG00000004530	Coro1c	1380.69	644.836	644.836	2470.46	1462.31	1523.52	1374.88	1357.36	-0.883612	0.325355	-2.71584	0.0066108	0.0209137
ENSMUSG00000004535	Tax1bp1	858.485	1434.72	1434.72	1013.37	1237.29	1203.45	1074.43	1179.49	0.128463	0.221027	0.58121	0.561099	0.666893
ENSMUSG00000004561	Mettl17	70.2801	10.4851	10.4851	48.5695	43.7353	35.8125	35.8399	36.4582	-0.309196	0.570824	-0.541665	0.588049	0.690273
ENSMUSG00000004562	Arhgef40	24.0198	71.6485	71.6485	56.8016	14.8136	17.9062	44.228	43.0094	0.59798	0.53697	1.11362	0.265443	0.381046
ENSMUSG00000004565	Pnpla6	209.061	118.832	118.832	102.901	85.3543	79.0859	46.5156	108.655	0.868937	0.357625	2.42974	0.0151095	0.0403524
ENSMUSG00000004567	Mcoln1	942.109	304.069	304.069	429.716	354.82	383.492	411.015	447.042	0.36225	0.378031	0.958255	0.337934	0.455782
ENSMUSG00000004568	Arhgef18	25.799	1.74752	1.74752	37.8677	17.6352	8.95312	60.2415	21.9988	-1.01579	0.672459	-1.51055	0.130902	0.220707
ENSMUSG00000004591	Pkn2	288.237	961.138	961.138	200.04	263.117	200.699	230.29	443.523	1.58865	0.370262	4.29061	1.7818e-05	0.000168358
ENSMUSG00000004609	Cd33	627.183	199.218	199.218	1669.47	411.253	487.945	459.818	579.158	-0.971917	0.498412	-1.95003	0.0511729	0.105993
ENSMUSG00000004610	Etfb	72.0594	139.802	139.802	79.8515	83.2381	96.2461	81.593	98.9417	0.420651	0.311018	1.3525	0.176217	0.277424
ENSMUSG00000004626	Stxbp2	609.391	505.034	505.034	462.645	438.058	485.707	469.732	496.514	0.22091	0.150181	1.47096	0.141301	0.234101
ENSMUSG00000004631	Sgce	5.33773	0	0	58.448	19.046	11.1914	23.6391	16.8089	-2.2302	0.671959	-3.31896	0.000903535	0.00426112
ENSMUSG00000004633	Chn2	36.4745	0	0	101.255	21.8676	13.4297	12.2008	26.4611	-0.749032	0.70002	-1.07002	0.284612	0.401664
ENSMUSG00000004637	Wwox	74.7282	94.3663	94.3663	51.0391	45.8515	48.4961	65.5794	67.7753	0.694036	0.289688	2.39581	0.0165839	0.0432954
ENSMUSG00000004642	Slbp	293.575	380.96	380.96	381.147	531.172	495.406	449.143	416.052	-0.397428	0.20078	-1.97942	0.0477686	0.100242
ENSMUSG00000004655	Aqp1	11.5651	10.4851	10.4851	859.433	123.446	59.6875	106.757	168.837	-3.35216	0.613779	-5.46151	4.72102e-08	1.09328e-06
ENSMUSG00000004661	Arid3b	89.8518	85.6287	85.6287	43.6302	56.4326	40.2891	60.2415	65.9575	0.760273	0.291633	2.60695	0.00913515	0.0272096
ENSMUSG00000004665	Cnn2	409.226	101.356	101.356	563.077	571.38	500.629	616.141	409.024	-1.30202	0.427022	-3.04907	0.00229552	0.00897399
ENSMUSG00000004667	Polr2e	276.672	393.193	393.193	573.778	318.844	333.504	334.76	374.849	-0.136318	0.278946	-0.488688	0.625062	0.722306
ENSMUSG00000004677	Myo9b	814.004	340.767	340.767	527.678	680.718	793.844	574.201	581.711	-0.34296	0.33168	-1.03401	0.301132	0.418136
ENSMUSG00000004698	Hdac9	97.8584	103.104	103.104	138.3	64.8975	73.8633	47.2782	89.7721	0.296088	0.385213	0.768633	0.442111	0.557804
ENSMUSG00000004707	Ly9	263.328	192.228	192.228	311.997	452.872	346.187	488.795	321.091	-0.853559	0.247692	-3.44605	0.000568839	0.00293938
ENSMUSG00000004709	Cd244	81.8452	13.9802	13.9802	91.3765	78.3003	78.3398	80.0679	62.5557	-0.932255	0.527355	-1.7678	0.0770951	0.146078
ENSMUSG00000004730	Adgre1	2156.44	1165.6	1165.6	4307.86	5378.03	3629.75	5707.7	3358.71	-1.60057	0.273349	-5.85542	4.75798e-09	1.55631e-07
ENSMUSG00000004771	Rab11a	1320.2	1041.52	1041.52	1932.08	1336.75	1482.49	1467.15	1374.53	-0.443997	0.190362	-2.33238	0.0196809	0.0496362
ENSMUSG00000004788	Eif2b2	171.697	134.559	134.559	139.123	109.338	95.5	93.0313	125.401	0.421219	0.258945	1.62668	0.103806	0.184497
ENSMUSG00000004789	Dlst	642.307	401.931	401.931	689.028	504.367	528.98	554.375	531.845	-0.226807	0.236972	-0.957104	0.338515	0.456302
ENSMUSG00000004791	Pgf	9.78584	64.6584	64.6584	8.23211	17.6352	36.5586	9.91317	30.206	1.00964	0.606014	1.66604	0.0957058	0.172596
ENSMUSG00000004798	Ulk2	269.555	239.411	239.411	493.927	284.985	240.242	353.824	303.051	-0.43893	0.27897	-1.5734	0.115627	0.200575
ENSMUSG00000004814	Ccl24	72.0594	125.822	125.822	242.024	25.3947	88.0391	20.5889	99.9642	0.150695	0.594994	0.253271	0.800059	0.858834
ENSMUSG00000004815	Dgkq	94.2999	3.49505	3.49505	21.4035	51.4948	42.5273	44.228	37.2777	-0.141819	0.667153	-0.212573	0.83166	0.881959
ENSMUSG00000004837	Grap	41.8122	92.6188	92.6188	79.8515	38.092	26.1133	51.0909	60.3139	0.550088	0.452274	1.21627	0.223882	0.334867
ENSMUSG00000004843	Chmp2b	261.549	89.1237	89.1237	448.65	356.936	364.094	373.65	283.304	-1.27393	0.37296	-3.41572	0.000636133	0.00321099
ENSMUSG00000004846	Plod3	368.303	169.51	169.51	523.562	651.797	399.906	562	406.37	-1.10518	0.320804	-3.44503	0.000570989	0.00294896
ENSMUSG00000004849	Ap1s1	528.435	823.084	823.084	437.125	375.277	320.074	343.911	521.57	0.94448	0.226072	4.17779	2.94361e-05	0.000256516
ENSMUSG00000004865	Srpk1	238.419	235.916	235.916	93.8461	168.592	210.398	153.273	190.909	0.569041	0.291601	1.95144	0.0510052	0.105768
ENSMUSG00000004880	Lbr	162.801	17.4752	17.4752	289.77	240.544	270.086	210.464	172.659	-1.53401	0.556422	-2.75691	0.00583498	0.0189621
ENSMUSG00000004895	Prcc	20.4613	17.4752	17.4752	14.8178	21.8676	33.5742	35.0774	22.9641	-0.437503	0.472318	-0.926287	0.354297	0.472101
ENSMUSG00000004896	Rrnad1	99.6376	69.901	69.901	20.5803	48.6731	35.8125	28.2144	53.2457	1.1621	0.385147	3.01729	0.00255046	0.0097747
ENSMUSG00000004897	Hdgf	525.766	971.623	971.623	665.155	605.945	589.414	581.827	701.622	0.413965	0.243139	1.70259	0.0886454	0.162577
ENSMUSG00000004929	Thop1	55.1566	10.4851	10.4851	102.901	52.9056	92.5156	67.1045	55.9363	-1.30593	0.532101	-2.45429	0.0141163	0.0381669
ENSMUSG00000004931	Apba3	200.165	146.792	146.792	182.753	129.795	164.141	166.999	162.491	0.0425891	0.240239	0.177278	0.85929	0.901977
ENSMUSG00000004933	Matk	399.44	702.505	702.505	177.814	213.739	281.277	265.368	391.807	1.30031	0.275512	4.7196	2.36309e-06	3.0563e-05
ENSMUSG00000004934	Pias4	160.132	506.782	506.782	116.073	131.911	102.215	136.497	237.199	1.55024	0.374697	4.13731	3.51399e-05	0.000297354
ENSMUSG00000004936	Map2k1	541.78	186.985	186.985	559.784	741.384	514.059	619.954	478.704	-0.913854	0.369071	-2.4761	0.0132828	0.0365508
ENSMUSG00000004937	Sgta	392.323	148.54	148.54	383.616	287.101	235.02	287.482	268.946	-0.339245	0.368159	-0.921464	0.356808	0.474582
ENSMUSG00000004945	Tmem242	89.8518	221.936	221.936	81.4979	86.7652	94.7539	111.332	129.725	0.854797	0.350833	2.43648	0.014831	0.0397475
ENSMUSG00000004947	Dtx2	103.196	29.7079	29.7079	63.3873	64.1921	64.1641	94.5564	64.1302	-0.326047	0.46368	-0.703173	0.481948	0.59582
ENSMUSG00000004952	Rasa4	1608.44	1310.64	1310.64	581.187	940.309	969.922	1014.96	1105.16	0.667351	0.2295	2.90784	0.00363931	0.0129823
ENSMUSG00000004980	Hnrnpa2b1	3587.84	2394.11	2394.11	2928.99	3514.34	3505.15	3201.19	3075.1	-0.229779	0.194439	-1.18175	0.237304	0.349201
ENSMUSG00000004994	Ccdc130	76.5075	34.9505	34.9505	60.0944	69.13	44.7656	69.3922	55.6844	-0.263596	0.395072	-0.667209	0.504639	0.616871
ENSMUSG00000004996	Mri1	160.132	319.797	319.797	64.2105	87.4706	78.3398	83.8806	159.09	1.66672	0.307562	5.41912	5.98937e-08	1.33742e-06
ENSMUSG00000005034	Prkacb	523.098	202.713	202.713	833.913	495.902	519.281	529.973	472.513	-0.867214	0.362862	-2.38993	0.0168517	0.0438129
ENSMUSG00000005043	Sgsh	80.9556	76.8911	76.8911	144.062	132.617	158.172	155.56	117.878	-0.887571	0.223568	-3.97003	7.18625e-05	0.000536443
ENSMUSG00000005054	Cstb	4881.35	8279.77	8279.77	2481.98	3845.88	4395.98	4016.36	5168.73	0.920382	0.262993	3.49965	0.000465875	0.002494
ENSMUSG00000005057	Sh2b2	594.267	545.228	545.228	288.124	380.215	514.805	343.911	458.825	0.541698	0.231164	2.34334	0.0191118	0.0484055
ENSMUSG00000005069	Pex5	272.224	358.242	358.242	345.749	257.474	284.262	165.474	291.667	0.308005	0.280485	1.09812	0.272153	0.38808
ENSMUSG00000005078	Jkamp	111.203	64.6584	64.6584	155.587	141.082	140.266	178.437	122.27	-0.874474	0.288994	-3.02593	0.00247874	0.00955408
ENSMUSG00000005087	Cd44	3425.93	5232.09	5232.09	3209.7	3591.94	3674.51	3599.24	3995.07	0.387826	0.188672	2.05556	0.0398251	0.0869859
ENSMUSG00000005089	Slc1a2	0.889622	17.4752	17.4752	0	7.05408	20.1445	9.15061	10.3128	0.191061	0.699863	0.272998	0.784855	0.847704
ENSMUSG00000005102	Eif2ak4	142.339	195.723	195.723	88.9068	137.555	95.5	93.0313	135.54	0.739633	0.270424	2.73509	0.00623636	0.020019
ENSMUSG00000005103	Wdr1	2290.78	976.866	976.866	3474.78	3138.36	2768.01	2883.97	2358.52	-1.05782	0.305478	-3.46283	0.00053452	0.00279354
ENSMUSG00000005107	Slc2a9	34.6953	24.4653	24.4653	35.3981	43.7353	25.3672	25.9267	30.579	-0.186894	0.411447	-0.454237	0.649658	0.742723
ENSMUSG00000005124	Wisp1	5.33773	69.901	69.901	23.0499	30.3325	5.22266	13.7259	31.0672	1.00308	0.634875	1.57996	0.114115	0.198403
ENSMUSG00000005125	Ndrg1	527.546	854.539	854.539	298.826	377.393	488.691	352.299	536.262	0.938221	0.255954	3.66559	0.000246774	0.00148036
ENSMUSG00000005142	Man2b1	1984.75	1053.76	1053.76	5322.06	3016.32	2341.24	2853.47	2517.91	-1.23214	0.328803	-3.74736	0.000178707	0.00113596
ENSMUSG00000005150	Wdr83	76.5075	31.4554	31.4554	69.1498	71.2462	57.4492	60.2415	56.7864	-0.400206	0.396675	-1.0089	0.313021	0.430565
ENSMUSG00000005161	Prdx2	665.437	964.633	964.633	863.549	849.311	908.742	976.828	884.733	-0.0594579	0.184845	-0.321664	0.747707	0.820338
ENSMUSG00000005198	Polr2a	48.9292	97.8614	97.8614	191.808	220.087	216.367	260.793	161.958	-1.39935	0.299697	-4.66921	3.02363e-06	3.78697e-05
ENSMUSG00000005204	Senp3	140.56	300.574	300.574	116.073	138.26	179.062	131.921	186.718	0.754194	0.321358	2.3469	0.0189303	0.0480263
ENSMUSG00000005225	Plekha8	42.7018	0	0	37.0445	60.6651	49.9883	41.1778	33.0825	-0.937628	0.693649	-1.35173	0.176461	0.277645
ENSMUSG00000005233	Spc25	29.3575	48.9307	48.9307	71.6194	31.7433	51.4805	69.3922	50.2077	-0.379281	0.40796	-0.929701	0.352526	0.470328
ENSMUSG00000005237	Dnah2	67.6113	48.9307	48.9307	1.64642	7.75949	8.95312	11.4383	27.8957	2.42957	0.512183	4.74355	2.1001e-06	2.76294e-05
ENSMUSG00000005262	Ufd1l	311.368	298.827	298.827	240.378	239.133	218.605	247.829	264.995	0.354977	0.156789	2.26404	0.0235717	0.057418
ENSMUSG00000005267	Zfp287	18.6821	12.2327	12.2327	43.6302	25.3947	7.46094	23.6391	20.4675	-0.617123	0.565848	-1.09062	0.275441	0.391734
ENSMUSG00000005299	Letm1	369.193	204.46	204.46	393.495	375.277	280.531	275.281	300.385	-0.328374	0.286574	-1.14586	0.251854	0.36596
ENSMUSG00000005312	Ubqln1	458.155	389.698	389.698	913.765	892.341	761.762	793.053	656.924	-1.00812	0.156799	-6.42941	1.281e-10	6.85078e-09
ENSMUSG00000005354	Txn2	320.264	356.495	356.495	384.44	368.928	328.281	348.486	351.913	-0.0571037	0.155298	-0.367704	0.713094	0.794092
ENSMUSG00000005362	Crbn	145.898	169.51	169.51	174.521	146.019	155.934	152.51	159.129	0.0325004	0.198679	0.163583	0.87006	0.910672
ENSMUSG00000005370	Msh6	104.975	92.6188	92.6188	102.078	69.13	176.824	136.497	110.677	-0.299405	0.351949	-0.850706	0.394932	0.511838
ENSMUSG00000005371	Fbxo11	214.399	384.455	384.455	97.1389	196.103	259.641	169.286	243.64	0.797158	0.354509	2.24862	0.0245364	0.0591216
ENSMUSG00000005374	Tbl2	71.1697	47.1832	47.1832	93.8461	67.7191	117.883	67.1045	73.1555	-0.590444	0.348909	-1.69226	0.0905967	0.165306
ENSMUSG00000005378	Wbscr22	140.56	181.743	181.743	142.416	122.036	120.867	122.008	144.482	0.386577	0.2175	1.77737	0.0755076	0.14386
ENSMUSG00000005410	Mcm5	75.6179	118.832	118.832	86.4372	195.398	140.266	127.346	123.247	-0.380732	0.341248	-1.11571	0.264548	0.380221
ENSMUSG00000005413	Hmox1	4259.51	1242.49	1242.49	2687.79	3812.02	5782.97	3779.97	3258.18	-0.755774	0.411704	-1.83572	0.0663989	0.129931
ENSMUSG00000005417	Mprip	201.055	220.188	220.188	236.262	177.057	259.641	273.756	226.878	-0.144883	0.223393	-0.648557	0.516625	0.627649
ENSMUSG00000005442	Cic	112.982	106.599	106.599	155.587	166.476	172.348	170.049	141.52	-0.595162	0.198446	-2.99911	0.00270767	0.01023
ENSMUSG00000005447	Pafah1b3	53.3773	62.9109	62.9109	35.3981	57.138	55.957	62.5292	55.7459	0.160014	0.329374	0.485813	0.6271	0.723804
ENSMUSG00000005469	Prkaca	153.015	124.074	124.074	161.349	223.614	226.812	236.391	178.476	-0.637724	0.236646	-2.69484	0.00704216	0.0219921
ENSMUSG00000005470	Asf1b	57.8254	52.4257	52.4257	56.8016	69.13	55.2109	114.383	65.4574	-0.410258	0.364287	-1.1262	0.260082	0.375113
ENSMUSG00000005481	Ddx39	383.427	311.059	311.059	324.345	432.415	466.309	356.111	369.247	-0.226716	0.208382	-1.08799	0.276601	0.393003
ENSMUSG00000005483	Dnajb1	245.536	260.381	260.381	270.013	312.496	245.465	239.441	261.959	-0.0644681	0.184701	-0.349041	0.727058	0.805617
ENSMUSG00000005501	Usp40	176.145	251.643	251.643	53.5087	114.276	142.504	108.282	156.858	1.03758	0.343918	3.01694	0.00255337	0.00977825
ENSMUSG00000005506	Celf1	1017.73	1252.97	1252.97	429.716	586.899	584.191	494.896	802.769	1.14238	0.182842	6.24792	4.15963e-10	1.93441e-08
ENSMUSG00000005510	Ndufs3	330.05	408.921	408.921	312.82	301.915	261.133	325.609	335.624	0.338189	0.179573	1.88329	0.0596606	0.119567
ENSMUSG00000005514	Por	1263.26	1111.43	1111.43	677.503	840.846	825.926	787.715	945.443	0.564664	0.146301	3.85961	0.000113569	0.000777677
ENSMUSG00000005533	Igf1r	71.1697	101.356	101.356	27.166	28.2163	49.2422	41.9403	60.0639	1.21892	0.351932	3.46353	0.000533145	0.00279125
ENSMUSG00000005534	Insr	181.483	99.6089	99.6089	144.062	146.019	119.375	131.921	131.725	-0.0719009	0.293446	-0.245022	0.806439	0.863777
ENSMUSG00000005566	Trim28	121.878	24.4653	24.4653	172.874	180.584	290.977	211.227	146.639	-1.61094	0.489097	-3.29369	0.0009888	0.00457672
ENSMUSG00000005575	Ube2m	262.438	407.173	407.173	302.119	338.596	371.555	351.536	348.656	0.0648107	0.219877	0.294759	0.768178	0.835384
ENSMUSG00000005580	Adcy9	35.5849	26.2129	26.2129	31.282	28.2163	31.3359	27.4518	29.471	0.00980529	0.372913	0.0262938	0.979023	0.985208
ENSMUSG00000005583	Mef2c	531.104	733.96	733.96	1248.81	453.577	505.105	475.069	668.798	-0.00922501	0.364023	-0.0253419	0.979782	0.98568
ENSMUSG00000005609	Ctr9	173.476	124.074	124.074	187.692	217.266	216.367	163.186	172.305	-0.453853	0.240282	-1.88884	0.0589135	0.11838
ENSMUSG00000005610	Eif4g2	2079.05	997.836	997.836	2844.2	3450.85	3983.39	3625.93	2568.44	-1.29519	0.284109	-4.55878	5.14516e-06	5.95732e-05
ENSMUSG00000005611	Mrvi1	0	0	0	56.8016	1.41082	4.47656	11.4383	10.5896	-1.88498	0.696293	-2.70716	0.0067862	0.0213549
ENSMUSG00000005615	Pcyt1a	1078.22	1043.27	1043.27	1378.88	820.389	904.266	887.61	1022.27	0.0788506	0.217687	0.362219	0.717188	0.797489
ENSMUSG00000005621	Zfp592	213.509	97.8614	97.8614	169.582	217.266	240.242	185.3	174.517	-0.52505	0.332026	-1.58135	0.113798	0.197915
ENSMUSG00000005625	Psmd4	634.3	835.317	835.317	578.718	622.17	527.488	630.63	666.277	0.371979	0.171602	2.16768	0.0301832	0.0694727
ENSMUSG00000005656	Snx6	566.689	342.515	342.515	839.676	754.081	905.012	738.15	641.234	-0.921621	0.231075	-3.98841	6.65174e-05	0.000502096
ENSMUSG00000005667	Mthfd2	37.3641	71.6485	71.6485	65.8569	93.1138	111.914	90.7436	77.4699	-0.568312	0.349849	-1.62445	0.10428	0.185124
ENSMUSG00000005672	Kit	0.889622	0	0	0.823211	22.573	7.46094	8.38806	5.73355	-1.67233	0.69902	-2.39239	0.0167389	0.0436133
ENSMUSG00000005674	Tomm40l	48.9292	43.6881	43.6881	32.1052	25.3947	19.3984	18.3012	33.0721	0.864534	0.381486	2.26622	0.0234376	0.0571826
ENSMUSG00000005682	Pan2	98.748	125.822	125.822	88.9068	88.8814	55.2109	58.7164	91.7296	0.640004	0.302209	2.11776	0.0341958	0.0769046
ENSMUSG00000005683	Cs	560.462	578.43	578.43	897.3	830.97	755.047	743.487	706.304	-0.49058	0.140596	-3.48928	0.000484332	0.00257494
ENSMUSG00000005686	Ampd3	185.041	134.559	134.559	218.151	221.498	196.223	183.012	181.863	-0.410852	0.221572	-1.85426	0.0637015	0.125502
ENSMUSG00000005687	Bcas2	550.676	641.341	641.341	444.534	438.764	441.687	334.76	499.015	0.546961	0.177476	3.08189	0.00205688	0.00826149
ENSMUSG00000005698	Ctcf	190.379	512.025	512.025	220.621	249.009	240.242	289.007	316.187	0.649114	0.336615	1.92836	0.0538109	0.110113
ENSMUSG00000005699	Pard6a	24.0198	12.2327	12.2327	32.9285	26.1001	35.8125	28.9769	24.6147	-0.783185	0.446	-1.75602	0.0790847	0.149161
ENSMUSG00000005732	Ranbp1	464.383	714.737	714.737	462.645	680.718	699.836	719.848	636.701	-0.0242935	0.243178	-0.0999002	0.920424	0.945347
ENSMUSG00000005774	Rfx5	61.3839	0	0	56.8016	32.4488	54.4648	53.3786	36.9254	-0.660031	0.697798	-0.945877	0.344211	0.461794
ENSMUSG00000005779	Psmb4	548.897	669.302	669.302	641.282	512.126	484.961	498.709	574.94	0.229317	0.179005	1.28106	0.200171	0.306387
ENSMUSG00000005800	Mmp8	49.8188	10.4851	10.4851	23.8731	24.6893	98.4844	52.616	38.636	-0.795473	0.596124	-1.33441	0.18207	0.284594
ENSMUSG00000005802	Slc30a4	8.0066	26.2129	26.2129	47.7463	29.6271	29.8437	25.9267	27.6537	-0.652116	0.496433	-1.3136	0.188979	0.292903
ENSMUSG00000005803	Sqrdl	185.041	10.4851	10.4851	297.179	260.295	249.195	237.153	178.548	-1.41182	0.609903	-2.31483	0.0206221	0.0515582
ENSMUSG00000005804	Bloc1s6	93.4103	104.851	104.851	154.764	102.99	95.5	111.332	109.671	-0.196109	0.272678	-0.719197	0.47202	0.586515
ENSMUSG00000005813	Metap1	307.809	359.99	359.99	168.758	158.717	162.648	126.584	234.928	1.12548	0.195172	5.76664	8.08685e-09	2.4573e-07
ENSMUSG00000005823	Gpr108	365.635	505.034	505.034	421.484	350.588	312.613	355.349	402.248	0.336882	0.203926	1.65198	0.0985386	0.176751
ENSMUSG00000005824	Tnfsf14	63.1631	50.6782	50.6782	22.2267	11.9919	32.8281	16.7761	35.4775	1.24996	0.429607	2.90954	0.00361958	0.0129352
ENSMUSG00000005846	Rsl1d1	221.516	225.431	225.431	377.854	426.066	528.98	466.681	353.137	-0.987688	0.18826	-5.24642	1.55086e-07	2.99423e-06
ENSMUSG00000005871	Apc	346.063	323.292	323.292	299.649	293.45	293.961	293.582	310.47	0.166366	0.144368	1.15238	0.249165	0.362693
ENSMUSG00000005873	Reep5	549.786	751.435	751.435	588.596	740.678	752.809	867.783	714.646	-0.109074	0.205899	-0.529747	0.596287	0.697189
ENSMUSG00000005881	Ergic3	457.266	581.926	581.926	535.911	476.856	367.824	475.832	496.791	0.211822	0.199111	1.06384	0.287401	0.404426
ENSMUSG00000005882	Uqcc1	66.7216	89.1237	89.1237	107.017	90.9976	89.5312	98.3691	90.1264	-0.246946	0.255598	-0.96615	0.333969	0.451968
ENSMUSG00000005886	Ncoa2	308.699	193.975	193.975	232.969	200.336	264.863	247.829	234.664	-0.0150331	0.248155	-0.0605792	0.951694	0.967616
ENSMUSG00000005893	Nr2c2	209.951	178.247	178.247	221.444	153.073	134.297	150.985	175.178	0.193726	0.251976	0.768829	0.441995	0.557761
ENSMUSG00000005897	Nr2c1	80.9556	13.9802	13.9802	65.8569	57.8434	101.469	86.1683	60.0362	-0.870665	0.539269	-1.61453	0.106413	0.188069
ENSMUSG00000005899	Smpd4	133.443	131.064	131.064	97.9622	94.5246	90.2773	98.3691	110.958	0.45934	0.208736	2.20059	0.0277654	0.0649702
ENSMUSG00000005907	Pex1	103.196	225.431	225.431	71.6194	78.3003	51.4805	43.4654	114.132	1.4684	0.365817	4.01402	5.9692e-05	0.000460446
ENSMUSG00000005936	Kctd20	415.453	83.8812	83.8812	428.893	380.215	373.047	372.888	305.465	-0.863632	0.466204	-1.85248	0.0639575	0.125891
ENSMUSG00000005949	Ctns	187.71	159.025	159.025	307.058	198.925	188.016	198.263	199.717	-0.384504	0.25668	-1.49799	0.134137	0.224835
ENSMUSG00000005968	Tuft1	25.799	38.4455	38.4455	55.1552	26.1001	25.3672	35.0774	34.9128	-0.0555982	0.430075	-0.129276	0.89714	0.931034
ENSMUSG00000005981	Trap1	182.372	129.317	129.317	288.124	270.171	285.008	336.285	231.513	-0.963991	0.219399	-4.39377	1.11401e-05	0.000114792
ENSMUSG00000005982	Naa60	261.549	246.401	246.401	454.413	361.169	300.676	347.723	316.904	-0.527445	0.204654	-2.57725	0.009959	0.029232
ENSMUSG00000005986	Ankrd13d	56.9358	62.9109	62.9109	29.6356	33.8596	20.1445	37.365	43.3946	0.937657	0.351949	2.66419	0.00771743	0.0237282
ENSMUSG00000006005	Tpr	513.312	1244.24	1244.24	713.724	861.303	902.773	863.971	906.222	0.245201	0.301259	0.813921	0.41569	0.531833
ENSMUSG00000006010	BC003331	164.58	325.039	325.039	263.428	268.055	218.605	324.084	269.833	0.00784455	0.290665	0.0269883	0.978469	0.984822
ENSMUSG00000006014	Prg4	33.8056	146.792	146.792	157.233	356.231	25.3672	300.445	166.667	-0.731168	0.586263	-1.24717	0.212336	0.32142
ENSMUSG00000006019	Dhx34	148.567	181.743	181.743	169.582	126.973	97.7383	130.396	148.106	0.362116	0.261547	1.38452	0.1662	0.264899
ENSMUSG00000006021	Kptn	58.715	5.24257	5.24257	55.9784	43.0299	49.2422	44.228	37.3827	-0.755293	0.610016	-1.23815	0.21566	0.325575
ENSMUSG00000006024	Napa	1286.39	851.044	851.044	922.82	864.83	903.519	911.249	941.557	0.146315	0.194404	0.75263	0.451672	0.567295
ENSMUSG00000006050	Sra1	757.068	817.841	817.841	339.163	436.647	397.668	433.892	571.446	0.974467	0.157561	6.18471	6.22155e-10	2.76123e-08
ENSMUSG00000006057	Atp5g1	550.676	931.43	931.43	413.252	419.718	520.773	432.367	599.949	0.821515	0.234244	3.50709	0.000453032	0.00243952
ENSMUSG00000006058	Snf8	207.282	347.757	347.757	145.708	178.468	204.43	202.839	233.463	0.685064	0.263432	2.60054	0.00930774	0.0276467
ENSMUSG00000006095	Tbcb	446.59	749.688	749.688	538.38	416.896	443.18	461.343	543.681	0.462758	0.233944	1.97807	0.0479205	0.100521
ENSMUSG00000006127	Inpp5k	385.206	244.653	244.653	594.359	435.942	452.133	486.508	406.208	-0.724254	0.238699	-3.03418	0.0024119	0.00935377
ENSMUSG00000006134	Crkl	185.041	27.9604	27.9604	265.074	191.165	255.164	205.126	165.356	-1.24289	0.520713	-2.3869	0.0169913	0.0440827
ENSMUSG00000006169	Clint1	440.363	435.134	435.134	630.58	563.621	597.621	564.288	523.82	-0.426416	0.132692	-3.21357	0.00131096	0.00575605
ENSMUSG00000006191	Cdkal1	315.816	75.1435	75.1435	138.3	182.701	145.488	89.2185	145.973	0.149084	0.47697	0.312565	0.754611	0.825457
ENSMUSG00000006205	Htra1	47.15	10.4851	10.4851	13.1714	64.8975	41.0352	52.616	34.2629	-0.679739	0.588423	-1.15519	0.248014	0.36139
ENSMUSG00000006215	Zbtb17	251.763	346.01	346.01	99.6086	121.33	105.945	84.6432	193.616	1.55949	0.234526	6.64954	2.94008e-11	1.92927e-09
ENSMUSG00000006219	Fblim1	240.198	326.787	326.787	227.206	194.693	246.211	266.13	261.145	0.336277	0.215731	1.55878	0.119049	0.204981
ENSMUSG00000006235	Epor	6.22735	0	0	8.23211	30.3325	19.3984	5.33786	9.93261	-1.46588	0.694013	-2.11218	0.0346709	0.0778094
ENSMUSG00000006262	Mob1b	244.646	179.995	179.995	220.621	251.831	252.926	206.651	219.523	-0.194061	0.213774	-0.907785	0.363992	0.481898
ENSMUSG00000006273	Atp6v1b2	2002.54	2130.23	2130.23	2591.47	2323.61	2492.7	2148.87	2259.95	-0.193637	0.123611	-1.56651	0.117229	0.20279
ENSMUSG00000006276	Eps15l1	153.905	178.247	178.247	83.1443	194.693	181.301	179.962	164.214	0.0822641	0.322384	0.255175	0.798588	0.857859
ENSMUSG00000006281	Tep1	523.987	464.841	464.841	367.975	374.572	340.965	399.577	419.537	0.385379	0.149268	2.58179	0.00982889	0.0289136
ENSMUSG00000006288	Ttc5	141.45	129.317	129.317	132.537	155.19	147.727	173.862	144.2	-0.183263	0.212629	-0.861891	0.388748	0.505968
ENSMUSG00000006289	Osgep	225.074	230.673	230.673	252.726	267.35	254.418	332.472	256.198	-0.270271	0.18993	-1.423	0.154736	0.251185
ENSMUSG00000006299	Aamp	633.411	899.975	899.975	671.74	689.889	675.961	661.132	733.155	0.257219	0.176318	1.45884	0.144609	0.23831
ENSMUSG00000006301	Tmbim1	1681.39	2002.66	2002.66	1902.44	1330.4	993.051	1323.03	1605.09	0.437119	0.234153	1.86681	0.0619277	0.122776
ENSMUSG00000006304	Arpc2	3277.37	3395.44	3395.44	3969.53	4197.18	4373.6	4716.38	3903.56	-0.360201	0.11351	-3.17331	0.00150713	0.00642458
ENSMUSG00000006307	Kmt2b	71.1697	111.842	111.842	46.0998	71.9516	73.1172	59.479	77.9286	0.600113	0.318244	1.8857	0.0593351	0.119093
ENSMUSG00000006310	Zbtb32	92.5207	52.4257	52.4257	14.8178	87.4706	10.4453	44.9905	50.728	0.58184	0.578016	1.00661	0.31412	0.431633
ENSMUSG00000006315	Tmem147	233.081	405.426	405.426	190.162	179.174	143.996	139.547	242.401	1.04432	0.269603	3.87353	0.000107268	0.000744061
ENSMUSG00000006333	Rps9	1219.67	2789.05	2789.05	1391.23	1542.02	1489.2	1704.3	1846.36	0.539684	0.283393	1.90436	0.056863	0.115038
ENSMUSG00000006335	Tfpt	56.9358	99.6089	99.6089	55.9784	28.9217	58.9414	47.2782	63.8962	0.762602	0.374885	2.03423	0.0419287	0.0905523
ENSMUSG00000006344	Ggt5	32.0264	19.2228	19.2228	8.23211	22.573	17.9062	16.0136	19.3138	0.473758	0.499124	0.94918	0.342529	0.459974
ENSMUSG00000006356	Crip2	88.0726	179.995	179.995	186.046	63.4867	40.2891	67.1045	114.998	0.639015	0.481299	1.32769	0.184281	0.287077
ENSMUSG00000006360	Crip1	4867.12	16940.5	16940.5	10085.2	4683.91	3792.39	4599.71	8844.18	1.043	0.418724	2.4909	0.012742	0.0355102
ENSMUSG00000006362	Cbfa2t3	32.0264	19.2228	19.2228	68.3265	31.0379	47.0039	39.6527	36.6419	-0.850102	0.434522	-1.95641	0.0504169	0.104894
ENSMUSG00000006373	Pgrmc1	306.92	33.203	33.203	538.38	396.439	474.516	519.297	328.851	-1.56895	0.547865	-2.86375	0.00418662	0.0145013
ENSMUSG00000006378	Gcat	2.66887	0	0	25.5196	11.9919	18.6523	14.4885	10.4745	-2.4366	0.655603	-3.71658	0.000201937	0.00125286
ENSMUSG00000006390	Elovl1	475.948	686.777	686.777	674.21	529.761	664.769	619.192	619.633	-0.0166608	0.199979	-0.0833124	0.933603	0.954576
ENSMUSG00000006392	Med8	242.867	239.411	239.411	216.505	193.282	200.699	246.304	225.497	0.165586	0.182713	0.906266	0.364795	0.482782
ENSMUSG00000006395	Hyi	52.4877	64.6584	64.6584	51.0391	33.8596	28.3516	50.3284	49.3404	0.522748	0.35653	1.46621	0.14259	0.235653
ENSMUSG00000006398	Cdc20	10.6755	40.1931	40.1931	55.9784	55.7272	46.2578	77.0177	46.5775	-0.862782	0.465189	-1.85469	0.0636401	0.125463
ENSMUSG00000006411	Nectin4	28.4679	27.9604	27.9604	88.0836	82.5327	39.543	60.2415	50.6842	-1.15199	0.39536	-2.91377	0.00357093	0.0127913
ENSMUSG00000006412	Pfdn2	133.443	181.743	181.743	171.228	188.344	176.824	187.588	174.416	-0.137677	0.210041	-0.655476	0.512161	0.623927
ENSMUSG00000006418	Rnf114	539.111	288.341	288.341	563.077	552.334	499.883	542.174	467.609	-0.509214	0.259278	-1.96397	0.0495336	0.103337
ENSMUSG00000006423	C330007P06Rik	301.582	344.262	344.262	310.351	278.636	285.008	277.569	305.953	0.189885	0.158058	1.20136	0.22961	0.340909
ENSMUSG00000006442	Srm	87.1829	118.832	118.832	173.698	122.741	161.156	173.099	136.506	-0.534942	0.255271	-2.09559	0.0361189	0.0804347
ENSMUSG00000006456	Rbm14	137.891	150.287	150.287	189.339	174.941	167.871	176.149	163.824	-0.276489	0.18762	-1.47366	0.140572	0.233092
ENSMUSG00000006463	Zdhhc24	56.9358	97.8614	97.8614	69.1498	50.7894	61.1797	32.7897	66.6524	0.594718	0.371675	1.6001	0.109576	0.192324
ENSMUSG00000006471	Ndor1	181.483	207.955	207.955	108.664	107.927	76.1016	83.1181	139.029	1.04779	0.238852	4.38677	1.15048e-05	0.000118208
ENSMUSG00000006476	Nsmf	129.885	146.792	146.792	117.719	65.6029	55.2109	69.3922	104.485	0.825333	0.322505	2.55913	0.0104934	0.0304249
ENSMUSG00000006494	Pdk1	248.204	256.886	256.886	251.079	450.05	405.875	417.116	326.585	-0.567967	0.244335	-2.32454	0.0200966	0.0504765
ENSMUSG00000006498	Ptbp1	815.783	269.119	269.119	1052.89	882.465	852.039	790.766	704.597	-0.907186	0.36979	-2.45325	0.0141573	0.0382679
ENSMUSG00000006517	Mvd	109.423	176.5	176.5	79.0283	55.0218	44.7656	35.8399	96.7256	1.41401	0.352466	4.01176	6.0269e-05	0.000464102
ENSMUSG00000006519	Cyba	3705.27	9062.66	9062.66	2700.13	2944.37	2725.48	3249.23	4778.54	1.26349	0.293934	4.29853	1.71931e-05	0.000164048
ENSMUSG00000006526	Tmem110	77.3971	173.005	173.005	108.664	91.703	77.5937	110.57	115.991	0.493633	0.341521	1.4454	0.148347	0.243138
ENSMUSG00000006527	Sfmbt1	201.944	173.005	173.005	170.405	186.933	218.605	191.4	187.9	-0.0629877	0.199033	-0.316469	0.751647	0.823309
ENSMUSG00000006585	Cdt1	207.282	141.549	141.549	142.416	150.252	181.301	138.784	157.59	0.102362	0.247443	0.413681	0.679108	0.766614
ENSMUSG00000006589	Aprt	1594.2	2855.45	2855.45	817.449	1085.62	1079.6	1136.96	1632.11	1.20075	0.245959	4.88191	1.05062e-06	1.5436e-05
ENSMUSG00000006599	Gtf2h1	356.738	391.445	391.445	274.129	365.401	337.98	295.87	344.716	0.24755	0.178926	1.38354	0.1665	0.265329
ENSMUSG00000006611	Hfe	503.526	323.292	323.292	676.68	644.743	611.797	600.128	526.208	-0.698917	0.211687	-3.30166	0.00096116	0.00448541
ENSMUSG00000006641	Slc5a6	11.5651	1.74752	1.74752	29.6356	14.1082	23.1289	28.9769	15.8442	-1.56104	0.609911	-2.55946	0.0104835	0.0304166
ENSMUSG00000006673	Qrich1	527.546	562.703	562.703	647.867	511.421	552.855	494.896	551.427	-0.00297317	0.162265	-0.0183229	0.985381	0.989544
ENSMUSG00000006676	Usp19	536.442	166.015	166.015	404.197	381.626	360.363	375.175	341.405	-0.353345	0.387903	-0.910912	0.362342	0.480368
ENSMUSG00000006678	Pola1	121.878	103.104	103.104	47.7463	74.0678	37.3047	54.9037	77.4441	0.977657	0.319467	3.06028	0.00221132	0.00872778
ENSMUSG00000006699	Cdc42	4914.27	3573.69	3573.69	7235.2	7401.14	7456.46	7814.63	5995.58	-0.882142	0.160146	-5.50837	3.62162e-08	8.82389e-07
ENSMUSG00000006705	Pknox1	202.834	223.683	223.683	181.93	189.049	141.012	149.46	187.379	0.378229	0.20825	1.81622	0.0693359	0.134521
ENSMUSG00000006715	Gmnn	54.2669	96.1138	96.1138	94.6693	119.214	124.598	118.958	100.562	-0.474582	0.298864	-1.58795	0.112297	0.195911
ENSMUSG00000006717	Acot13	153.015	188.733	188.733	175.344	113.571	148.473	143.36	158.747	0.270922	0.239335	1.13198	0.257643	0.372137
ENSMUSG00000006728	Cdk4	564.91	312.807	312.807	509.568	514.948	602.844	507.097	474.997	-0.405332	0.254667	-1.59162	0.111471	0.194914
ENSMUSG00000006731	B4galnt1	368.303	193.975	193.975	731.012	765.367	758.777	818.98	547.199	-1.53934	0.258982	-5.94382	2.78454e-09	9.86208e-08
ENSMUSG00000006732	Mettl1	23.1302	20.9703	20.9703	24.6963	22.573	35.0664	25.1642	24.653	-0.273225	0.411912	-0.663308	0.507133	0.619424
ENSMUSG00000006736	Tspan31	372.752	206.208	206.208	378.677	433.826	438.703	481.17	359.649	-0.690096	0.261617	-2.63781	0.00834438	0.0253268
ENSMUSG00000006740	Kif5b	744.613	947.158	947.158	865.195	1015.79	1038.56	937.938	928.059	-0.13435	0.160435	-0.837407	0.402364	0.519016
ENSMUSG00000006763	Saal1	43.5915	17.4752	17.4752	57.6248	43.7353	42.5273	59.479	40.2726	-0.810536	0.434089	-1.86721	0.061872	0.122772
ENSMUSG00000006782	Cnp	226.854	207.955	207.955	264.251	219.382	197.715	274.518	228.376	-0.150407	0.2064	-0.728717	0.466175	0.580821
ENSMUSG00000006800	Sulf2	453.707	214.945	214.945	2519.03	811.924	840.848	807.542	837.563	-1.85502	0.429325	-4.32079	1.55472e-05	0.000151313
ENSMUSG00000006818	Sod2	660.989	615.129	615.129	544.143	874	831.894	901.336	720.374	-0.313361	0.214992	-1.45754	0.144966	0.238621
ENSMUSG00000006850	Tmco6	76.5075	48.9307	48.9307	33.7517	26.8055	17.9062	22.114	39.278	1.12252	0.391145	2.86982	0.00410701	0.0142987
ENSMUSG00000006906	Stambp	143.229	166.015	166.015	112.78	90.9976	91.7695	128.109	128.416	0.55928	0.240075	2.32961	0.019827	0.049934
ENSMUSG00000006920	Ezh1	159.242	162.52	162.52	240.378	225.73	151.457	153.273	179.303	-0.246772	0.258774	-0.95362	0.340276	0.457753
ENSMUSG00000006932	Ctnnb1	1019.51	400.183	400.183	1011.73	917.735	846.816	823.555	774.244	-0.531202	0.329828	-1.61054	0.10728	0.189153
ENSMUSG00000006941	Eif1b	234.86	228.926	228.926	282.361	281.458	297.691	290.532	263.536	-0.313486	0.153798	-2.03829	0.0415205	0.0899359
ENSMUSG00000006998	Psmd2	842.472	534.742	534.742	1206.83	1179.44	1168.38	1065.28	933.128	-0.833078	0.207715	-4.01068	6.05437e-05	0.000465547
ENSMUSG00000007029	Vars	204.613	309.312	309.312	279.069	327.309	409.605	474.307	330.504	-0.430653	0.265626	-1.62128	0.104958	0.186082
ENSMUSG00000007036	Abhd16a	251.763	181.743	181.743	227.206	142.492	170.855	153.273	187.011	0.241222	0.260973	0.924319	0.35532	0.472935
ENSMUSG00000007038	Neu1	1533.71	1431.22	1431.22	725.249	931.844	849.055	814.405	1102.39	0.811832	0.141229	5.74834	9.01258e-09	2.666e-07
ENSMUSG00000007039	Ddah2	38.2537	8.73762	8.73762	45.2766	38.7974	41.0352	25.1642	29.4289	-0.784273	0.538235	-1.45712	0.145084	0.238741
ENSMUSG00000007041	Clic1	1704.52	2392.36	2392.36	2315.69	2657.27	2434.5	2904.56	2400.18	-0.250378	0.180145	-1.38987	0.164568	0.263129
ENSMUSG00000007050	Lsm2	67.6113	75.1435	75.1435	89.73	87.4706	85.8008	71.6798	78.9399	-0.203431	0.255451	-0.796362	0.425822	0.541633
ENSMUSG00000007080	Pole	10.6755	6.9901	6.9901	12.3482	38.092	33.5742	44.9905	21.9515	-1.56951	0.544599	-2.88195	0.00395225	0.0138601
ENSMUSG00000007338	Mrpl49	73.8386	62.9109	62.9109	92.1997	125.563	105.199	91.5061	87.7326	-0.605638	0.269153	-2.25016	0.0244388	0.058953
ENSMUSG00000007379	Dennd2c	35.5849	43.6881	43.6881	62.5641	28.2163	13.4297	27.4518	36.3747	0.267974	0.497266	0.538894	0.58996	0.691909
ENSMUSG00000007411	Mark3	542.669	496.297	496.297	373.738	399.966	298.437	407.965	430.767	0.461922	0.177801	2.59797	0.00937761	0.0278233
ENSMUSG00000007415	Gatad1	56.0462	64.6584	64.6584	48.5695	71.2462	62.6719	76.2551	63.4437	-0.0713112	0.302764	-0.235534	0.813794	0.869218
ENSMUSG00000007458	M6pr	1983.86	1041.52	1041.52	1738.62	2515.48	1819.72	2415.76	1793.79	-0.618399	0.277071	-2.23192	0.0256203	0.0610802
ENSMUSG00000007564	Ppp2r1a	926.096	609.886	609.886	1006.79	1084.21	1086.31	1014.96	905.448	-0.535125	0.196829	-2.71873	0.00655322	0.0207745
ENSMUSG00000007570	Fance	89.8518	54.1732	54.1732	55.9784	74.7732	52.9727	64.8169	63.8199	0.102743	0.330738	0.310647	0.756069	0.826376
ENSMUSG00000007589	Tinf2	303.361	166.015	166.015	114.426	113.571	113.406	106.757	154.793	0.890519	0.284234	3.13305	0.00172998	0.00717204
ENSMUSG00000007591	Tssk4	0.889622	0	0	0.823211	0	0.746094	1.5251	0.569147	-0.133433	0.543188	-0.245648	0.805954	0.863344
ENSMUSG00000007603	Dus3l	129.885	270.866	270.866	111.957	112.16	132.059	112.095	162.841	0.879798	0.304287	2.89134	0.003836	0.0135189
ENSMUSG00000007610	Gtpbp3	23.1302	5.24257	5.24257	24.6963	14.8136	15.668	29.7395	16.9332	-0.65679	0.585097	-1.12253	0.261636	0.3771
ENSMUSG00000007613	Tgfbr1	727.711	758.425	758.425	1102.28	1074.34	1049.75	1087.4	936.904	-0.525648	0.109359	-4.80663	1.53492e-06	2.13905e-05
ENSMUSG00000007617	Homer1	131.664	87.3762	87.3762	70.7962	74.7732	95.5	53.3786	85.8378	0.457989	0.319252	1.43457	0.151409	0.246984
ENSMUSG00000007655	Cav1	1104.02	555.713	555.713	786.99	1660.53	1327.3	1666.94	1093.89	-0.826419	0.331403	-2.4937	0.0126421	0.0353331
ENSMUSG00000007656	Arpp19	328.27	702.505	702.505	237.908	316.023	338.727	333.235	422.739	0.867557	0.29716	2.91949	0.00350602	0.0125967
ENSMUSG00000007659	Bcl2l1	628.073	176.5	176.5	308.704	326.604	315.598	355.349	326.761	0.00805804	0.408708	0.0197159	0.98427	0.988986
ENSMUSG00000007670	Khsrp	174.366	47.1832	47.1832	132.537	249.009	244.719	224.19	159.884	-1.08317	0.450965	-2.40189	0.0163106	0.0427258
ENSMUSG00000007721	Ccdc124	317.595	587.168	587.168	245.317	271.582	305.152	330.947	377.847	0.752784	0.264753	2.84335	0.00446423	0.0152554
ENSMUSG00000007739	Cct4	593.378	704.252	704.252	654.453	729.392	651.34	704.597	677.381	-0.0413974	0.142867	-0.289763	0.771998	0.838637
ENSMUSG00000007777	0610009B22Rik	103.196	221.936	221.936	110.31	81.8273	110.422	100.657	135.755	0.797177	0.324635	2.45561	0.0140646	0.038046
ENSMUSG00000007812	Zfp655	428.798	429.891	429.891	335.047	424.655	473.769	411.778	419.118	0.0609157	0.177485	0.343216	0.731436	0.808374
ENSMUSG00000007815	Rhoa	2734.7	1938	1938	3917.66	3133.42	2646.39	3242.37	2792.94	-0.540489	0.20508	-2.6355	0.0084014	0.0254854
ENSMUSG00000007817	Zmiz1	791.763	704.252	704.252	952.456	988.982	922.918	945.564	858.598	-0.370704	0.12228	-3.03159	0.00243272	0.00941743
ENSMUSG00000007827	Ankrd26	58.715	27.9604	27.9604	50.2159	50.7894	41.0352	44.228	42.9863	-0.227716	0.39132	-0.581917	0.560622	0.666491
ENSMUSG00000007833	Aldh16a1	301.582	323.292	323.292	307.058	203.157	209.652	253.93	274.566	0.366948	0.215674	1.70141	0.0888668	0.162872
ENSMUSG00000007836	Hnrnpa0	44.4811	73.396	73.396	39.5141	119.214	90.2773	93.7938	76.296	-0.397699	0.410501	-0.968816	0.332637	0.450479
ENSMUSG00000007837	Prrg2	76.5075	6.9901	6.9901	63.3873	45.8515	44.7656	56.4288	42.9887	-0.572729	0.607887	-0.942163	0.346109	0.463617
ENSMUSG00000007850	Hnrnph1	1099.57	1048.51	1048.51	739.244	853.543	750.57	744.25	897.744	0.461949	0.125766	3.6731	0.000239629	0.00144888
ENSMUSG00000007867	Ift43	8.0066	31.4554	31.4554	16.4642	33.1542	32.8281	26.6893	25.7219	-0.203368	0.52315	-0.388738	0.69747	0.781575
ENSMUSG00000007872	Id3	367.414	459.599	459.599	226.383	323.077	295.453	281.381	344.701	0.589549	0.200816	2.93576	0.00332728	0.0120844
ENSMUSG00000007880	Arid1a	116.54	206.208	206.208	243.671	306.147	364.094	292.82	247.955	-0.755425	0.273841	-2.75863	0.00580445	0.018918
ENSMUSG00000007891	Ctsd	15402.9	15435.9	15435.9	15594.9	13478.9	15665.7	13916.6	14990.1	0.0725255	0.11159	0.649927	0.515739	0.626715
ENSMUSG00000007892	Rplp1	838.024	2177.42	2177.42	636.342	623.58	717.742	626.055	1113.8	1.33688	0.310107	4.31102	1.62501e-05	0.000156164
ENSMUSG00000007950	Abhd8	21.3509	45.4356	45.4356	21.4035	18.3406	21.6367	22.114	27.9596	0.730717	0.426105	1.71487	0.0863684	0.159523
ENSMUSG00000007987	Ift22	149.456	185.238	185.238	156.41	161.538	113.406	150.223	157.358	0.23945	0.232461	1.03006	0.302981	0.420322
ENSMUSG00000008035	Mid1ip1	150.346	298.827	298.827	275.776	193.282	129.82	144.122	213	0.391154	0.351859	1.11168	0.266276	0.381935
ENSMUSG00000008036	Ap2s1	910.083	1303.65	1303.65	695.614	739.267	730.426	712.985	913.669	0.689895	0.176853	3.90095	9.58152e-05	0.000681862
ENSMUSG00000008140	Emc10	154.794	127.569	127.569	281.538	272.993	244.719	271.468	211.522	-0.939709	0.190369	-4.93625	7.96385e-07	1.21514e-05
ENSMUSG00000008167	Fbxw9	85.4037	5.24257	5.24257	70.7962	61.3705	41.7812	41.9403	44.5396	-0.51251	0.636837	-0.804775	0.420949	0.53716
ENSMUSG00000008200	Fnbp4	794.432	1043.27	1043.27	225.56	386.563	458.102	325.609	610.973	1.40551	0.262712	5.35001	8.79511e-08	1.84095e-06
ENSMUSG00000008226	Scrn3	38.2537	13.9802	13.9802	72.4426	26.8055	26.1133	48.8033	34.3398	-0.780951	0.524423	-1.48916	0.136445	0.227753
ENSMUSG00000008301	Phax	142.339	159.025	159.025	143.239	117.803	175.332	147.935	149.243	0.0654244	0.22978	0.284726	0.775854	0.841373
ENSMUSG00000008305	Tle1	82.7348	33.203	33.203	222.267	170.003	160.41	147.172	121.285	-1.64093	0.372853	-4.40102	1.07743e-05	0.000111452
ENSMUSG00000008307	1700109H08Rik	17.7924	3.49505	3.49505	9.87854	2.11622	6.71484	7.62551	7.30252	0.259916	0.667259	0.389528	0.696886	0.781167
ENSMUSG00000008318	Relt	64.0528	66.4059	66.4059	85.614	83.9435	120.867	133.446	88.6765	-0.660301	0.297662	-2.21829	0.0265348	0.0627413
ENSMUSG00000008333	Snrpb2	199.275	300.574	300.574	139.123	194.693	187.27	199.026	217.219	0.541298	0.248562	2.17772	0.0294267	0.0680096
ENSMUSG00000008348	Ubc	2055.92	1307.15	1307.15	2481.16	2605.78	2500.91	2627.75	2126.54	-0.696961	0.199528	-3.49304	0.000477553	0.00254758
ENSMUSG00000008373	Prpf31	174.366	129.317	129.317	262.604	335.774	299.184	277.569	229.733	-0.987244	0.215675	-4.57746	4.70656e-06	5.50781e-05
ENSMUSG00000008384	Sertad1	422.57	796.871	796.871	780.404	615.821	693.121	693.159	685.545	-0.0517618	0.252438	-0.205048	0.837535	0.886514
ENSMUSG00000008393	Carhsp1	194.827	138.054	138.054	478.286	365.401	264.117	316.459	270.743	-1.12516	0.274477	-4.09928	4.14443e-05	0.000338388
ENSMUSG00000008398	Elk3	304.251	529.5	529.5	477.463	618.643	558.078	558.188	510.803	-0.28074	0.241013	-1.16483	0.244087	0.356465
ENSMUSG00000008429	Herpud2	341.615	183.49	183.49	600.944	356.231	407.367	468.969	363.158	-0.901308	0.2997	-3.00737	0.00263519	0.010027
ENSMUSG00000008435	Rdh13	93.4103	45.4356	45.4356	42.807	50.0839	58.1953	57.9539	56.1888	0.238199	0.373854	0.637144	0.524031	0.634341
ENSMUSG00000008450	Nutf2	96.0792	89.1237	89.1237	91.3765	99.4625	135.789	107.52	101.211	-0.235387	0.258478	-0.910663	0.362473	0.480482
ENSMUSG00000008475	Arpc5	3219.54	3398.93	3398.93	5159.89	4669.8	4555.65	4758.32	4165.87	-0.516805	0.104951	-4.92423	8.46921e-07	1.28492e-05
ENSMUSG00000008496	Pou2f2	56.0462	160.772	160.772	39.5141	107.222	80.5781	136.497	105.915	0.402883	0.461367	0.873238	0.382534	0.500131
ENSMUSG00000008540	Mgst1	523.987	227.178	227.178	536.734	374.572	537.187	439.992	409.547	-0.495545	0.327254	-1.51425	0.129962	0.219532
ENSMUSG00000008604	Ubqln4	81.8452	104.851	104.851	81.4979	114.276	106.691	100.657	99.2386	-0.0627965	0.25868	-0.242757	0.808194	0.865038
ENSMUSG00000008668	Rps18	943.889	1850.63	1850.63	559.784	710.346	816.973	706.122	1062.62	1.10331	0.268417	4.11045	3.94896e-05	0.000326652
ENSMUSG00000008682	Rpl10	1302.41	1488.89	1488.89	995.263	1072.93	1158.68	1081.3	1226.91	0.400227	0.128915	3.10458	0.00190552	0.00779569
ENSMUSG00000008683	Rps15a	572.027	1088.71	1088.71	246.14	387.269	390.953	386.613	594.345	1.31506	0.285744	4.60223	4.17987e-06	4.97307e-05
ENSMUSG00000008690	Ncaph2	483.954	326.787	326.787	410.782	411.958	367.078	438.467	395.116	-0.0922962	0.208251	-0.443196	0.657624	0.749739
ENSMUSG00000008730	Hipk1	428.798	588.916	588.916	304.588	366.812	370.809	288.244	419.583	0.66765	0.203509	3.28068	0.00103556	0.00475786
ENSMUSG00000008734	Gprc5b	18.6821	27.9604	27.9604	32.1052	7.05408	2.23828	5.33786	17.334	0.760114	0.644376	1.17961	0.238154	0.350144
ENSMUSG00000008763	Man1a2	198.386	297.079	297.079	246.963	210.917	271.578	251.642	253.378	0.0958549	0.225673	0.424752	0.671018	0.761103
ENSMUSG00000008822	Acyp1	22.2405	48.9307	48.9307	40.3374	21.8676	25.3672	23.6391	33.0447	0.448121	0.443145	1.01123	0.311908	0.429265
ENSMUSG00000008845	Cd163	241.088	89.1237	89.1237	1795.42	505.777	567.777	480.407	538.389	-2.22112	0.478038	-4.64632	3.37903e-06	4.16864e-05
ENSMUSG00000008855	Hdac5	712.587	1090.46	1090.46	484.048	533.288	473.023	545.987	704.263	0.898971	0.202305	4.44363	8.8452e-06	9.46082e-05
ENSMUSG00000008859	Rala	376.31	898.227	898.227	350.688	574.202	513.312	622.242	604.744	0.45992	0.329808	1.39451	0.163164	0.261532
ENSMUSG00000008892	Vdac3	395.882	447.366	447.366	514.507	441.585	479.738	515.485	463.133	-0.182829	0.150226	-1.21702	0.223595	0.334605
ENSMUSG00000008958	Vps72	163.69	274.361	274.361	147.355	125.563	144.742	186.063	188.019	0.620315	0.272982	2.27237	0.0230642	0.0564002
ENSMUSG00000008976	Gabpa	185.931	108.346	108.346	421.484	250.42	306.645	297.395	239.795	-1.17694	0.294067	-4.00231	6.27278e-05	0.00047924
ENSMUSG00000009013	Dynll1	1321.09	2325.95	2325.95	1064.41	1211.89	1245.98	1247.53	1534.69	0.717885	0.22781	3.15124	0.00162577	0.00682764
ENSMUSG00000009030	Pdcl	137.002	54.1732	54.1732	228.03	162.244	154.441	192.925	140.427	-1.06098	0.371515	-2.85581	0.00429276	0.014791
ENSMUSG00000009035	Tmem184b	339.836	90.8713	90.8713	530.148	497.312	332.012	412.54	327.656	-1.19804	0.427271	-2.80394	0.00504818	0.0169374
ENSMUSG00000009073	Nf2	191.269	132.812	132.812	200.04	174.236	168.617	201.314	171.586	-0.266348	0.232821	-1.14401	0.252621	0.366726
ENSMUSG00000009076	Zmat5	82.7348	249.896	249.896	69.1498	64.1921	94.0078	63.2918	124.738	1.28775	0.39429	3.26599	0.00109082	0.00496063
ENSMUSG00000009079	Ewsr1	1842.41	1357.83	1357.83	1198.6	1146.99	1190.77	1242.96	1333.91	0.34448	0.162788	2.11613	0.0343335	0.0771331
ENSMUSG00000009090	Ap1b1	1035.52	604.643	604.643	1673.59	1364.96	1343.71	1425.21	1150.33	-0.924238	0.235098	-3.93128	8.44937e-05	0.000609814
ENSMUSG00000009112	Bcl2l13	138.781	160.772	160.772	93.8461	125.563	109.676	107.52	128.133	0.471329	0.222711	2.11633	0.0343171	0.0771126
ENSMUSG00000009185	Ccl8	2110.18	5142.96	5142.96	1499.89	2106.35	2867.24	2273.17	3020.39	0.864566	0.327092	2.64319	0.00821297	0.0249988
ENSMUSG00000009207	Lnpk1	64.0528	185.238	185.238	139.946	154.484	99.9766	102.944	133.126	0.191709	0.387072	0.495281	0.620402	0.718084
ENSMUSG00000009291	Pttg1ip	618.287	524.257	524.257	1232.35	761.135	758.031	832.706	750.146	-0.668811	0.226931	-2.9472	0.00320664	0.0117237
ENSMUSG00000009292	Trpm2	181.483	160.772	160.772	18.1106	126.268	167.125	87.6934	128.889	0.633569	0.505593	1.25312	0.210162	0.3188
ENSMUSG00000009293	Ube2g2	269.555	321.544	321.544	293.063	161.538	185.031	176.149	246.918	0.55411	0.265152	2.08978	0.0366374	0.0813184
ENSMUSG00000009376	Met	169.028	227.178	227.178	8.23211	62.7813	94.0078	44.9905	119.057	1.65649	0.520682	3.18139	0.00146571	0.00629695
ENSMUSG00000009406	Elk1	64.0528	129.317	129.317	37.0445	47.2623	40.2891	43.4654	70.1068	1.25318	0.345489	3.62725	0.000286456	0.0016679
ENSMUSG00000009418	Nav1	451.928	384.455	384.455	467.584	417.601	405.129	425.504	419.522	-0.0693211	0.15517	-0.446743	0.65506	0.747619
ENSMUSG00000009470	Tnpo1	323.822	298.827	298.827	392.672	339.301	517.043	435.417	372.273	-0.443347	0.203212	-2.1817	0.0291319	0.0675148
ENSMUSG00000009535	Rnmt	308.699	452.609	452.609	223.913	259.59	252.18	264.605	316.315	0.671784	0.208306	3.22498	0.0012598	0.00557043
ENSMUSG00000009549	Srp14	575.585	1064.24	1064.24	532.618	573.496	559.57	570.388	705.735	0.664902	0.241069	2.75814	0.00581308	0.0189332
ENSMUSG00000009555	Cdk9	781.088	863.277	863.277	686.558	705.408	801.305	844.907	792.26	0.134792	0.147253	0.915373	0.359996	0.477791
ENSMUSG00000009563	Tor2a	157.463	199.218	199.218	192.631	192.576	204.43	183.012	189.793	-0.0691156	0.193346	-0.35747	0.72074	0.800156
ENSMUSG00000009566	Fpgs	21.3509	47.1832	47.1832	44.4534	19.7514	24.6211	22.8765	32.4885	0.391096	0.465152	0.840793	0.400464	0.517189
ENSMUSG00000009569	Mkl2	95.1895	113.589	113.589	100.432	114.981	64.1641	99.1317	100.154	0.168724	0.289247	0.583323	0.559676	0.665735
ENSMUSG00000009575	Cbx5	89.8518	122.327	122.327	79.0283	134.027	93.2617	122.008	108.976	0.0456577	0.294557	0.155005	0.876818	0.915327
ENSMUSG00000009585	Apobec3	282.9	270.866	270.866	200.864	434.531	386.477	448.38	327.841	-0.399886	0.293072	-1.36446	0.172422	0.272694
ENSMUSG00000009621	Vav2	180.593	34.9505	34.9505	123.482	133.322	184.285	144.122	119.386	-0.671937	0.498479	-1.34797	0.177667	0.279187
ENSMUSG00000009630	Ppp2cb	27.5783	90.8713	90.8713	72.4426	79.0057	138.027	121.246	88.5774	-0.511815	0.437928	-1.16872	0.242517	0.354803
ENSMUSG00000009640	Dmap1	69.3905	26.2129	26.2129	80.6747	90.9976	80.5781	75.4926	64.2227	-0.884365	0.400769	-2.20667	0.027337	0.0641361
ENSMUSG00000009647	Mcu	53.3773	83.8812	83.8812	155.587	82.5327	72.3711	54.9037	83.7906	-0.287963	0.406111	-0.709075	0.478278	0.592639
ENSMUSG00000009654	Oit3	15.1236	33.203	33.203	9.05532	14.1082	9.69922	16.7761	18.7383	0.937732	0.499958	1.87562	0.0607072	0.121171
ENSMUSG00000009687	Fxyd5	3047.84	3447.87	3447.87	4474.15	4701.54	4388.52	4823.9	4047.38	-0.469844	0.111735	-4.205	2.61083e-05	0.000232906
ENSMUSG00000009733	Tfcp2	30.2471	1.74752	1.74752	24.6963	38.092	11.9375	21.3514	18.5456	-0.674242	0.664886	-1.01407	0.310549	0.42799
ENSMUSG00000009741	Ubp1	443.032	440.376	440.376	230.499	252.536	270.086	255.455	333.194	0.797892	0.148745	5.36415	8.13294e-08	1.72942e-06
ENSMUSG00000009772	Nuak2	526.656	623.866	623.866	591.066	828.149	820.703	824.318	691.232	-0.369069	0.188218	-1.96087	0.0498947	0.103908
ENSMUSG00000009828	Ick	27.5783	1.74752	1.74752	33.7517	39.5028	32.8281	54.1411	27.3282	-1.32484	0.631725	-2.09718	0.0359779	0.0802042
ENSMUSG00000009863	Sdhb	816.673	842.307	842.307	889.068	874	987.082	991.317	891.822	-0.165339	0.124834	-1.32447	0.185349	0.28853
ENSMUSG00000009894	Snap47	86.2933	20.9703	20.9703	109.487	79.0057	73.1172	93.7938	69.0911	-0.87976	0.481577	-1.82683	0.0677248	0.132115
ENSMUSG00000009905	Kdsr	129.885	314.554	314.554	173.698	111.454	119.375	125.058	184.083	0.866952	0.346776	2.50003	0.0124182	0.0348494
ENSMUSG00000009907	Vps4b	568.468	370.475	370.475	693.967	720.221	773.699	826.606	617.702	-0.76269	0.20975	-3.63618	0.000276712	0.00162176
ENSMUSG00000009927	Rps25	883.394	1506.37	1506.37	616.585	817.568	802.051	777.802	987.162	0.760438	0.234805	3.2386	0.00120119	0.00537121
ENSMUSG00000009995	Taz	508.864	941.916	941.916	274.129	278.636	231.289	266.13	491.84	1.54561	0.253208	6.10411	1.03373e-09	4.26903e-08
ENSMUSG00000010025	Aldh3a2	231.302	17.4752	17.4752	398.434	274.404	303.66	231.816	210.652	-1.33876	0.590879	-2.2657	0.0234695	0.0572308
ENSMUSG00000010045	Tmem115	132.554	101.356	101.356	201.687	232.785	202.937	199.026	167.386	-0.866658	0.215886	-4.01443	5.95888e-05	0.000460189
ENSMUSG00000010047	Hyal2	167.249	305.817	305.817	193.455	165.065	174.586	125.058	205.292	0.621414	0.290145	2.14174	0.0322145	0.073203
ENSMUSG00000010048	Ifrd2	34.6953	3.49505	3.49505	38.6909	36.6812	45.5117	21.3514	26.2744	-0.944488	0.618215	-1.52777	0.12657	0.215299
ENSMUSG00000010051	Hyal1	509.753	431.638	431.638	110.31	129.795	180.555	106.757	271.492	1.7399	0.245246	7.09449	1.29829e-12	1.3749e-10
ENSMUSG00000010054	Tusc2	112.982	241.158	241.158	75.7354	78.3003	88.0391	118.195	136.51	1.06071	0.337861	3.13949	0.00169245	0.00704375
ENSMUSG00000010057	Nprl2	99.6376	145.045	145.045	79.0283	84.6489	100.723	104.47	108.371	0.463873	0.26554	1.74691	0.0806535	0.151452
ENSMUSG00000010067	Rassf1	512.422	742.698	742.698	398.434	346.355	402.891	382.801	504.043	0.779555	0.194437	4.00929	6.09027e-05	0.000467971
ENSMUSG00000010095	Slc3a2	2476.71	4003.58	4003.58	2489.39	2658.68	2537.46	2894.64	3009.15	0.392164	0.204119	1.92125	0.0547002	0.111464
ENSMUSG00000010097	Nxf1	1700.07	1586.75	1586.75	728.542	696.943	816.973	693.922	1115.71	1.1373	0.127532	8.9177	4.76055e-19	2.03675e-16
ENSMUSG00000010110	Stx5a	778.419	574.935	574.935	293.063	357.642	392.445	356.111	475.365	0.863414	0.197964	4.36148	1.29188e-05	0.000129783
ENSMUSG00000010142	Tnfrsf13b	184.152	207.955	207.955	352.334	261.001	230.543	234.866	239.83	-0.421885	0.230003	-1.83426	0.0666154	0.130259
ENSMUSG00000010277	2610507B11Rik	660.989	489.307	489.307	1252.1	1060.23	1151.97	1099.6	886.215	-1.03927	0.1734	-5.99348	2.05401e-09	7.60196e-08
ENSMUSG00000010290	AI597479	48.9292	19.2228	19.2228	57.6248	52.2002	52.2266	57.9539	43.9114	-0.782382	0.416951	-1.87644	0.0605955	0.121033
ENSMUSG00000010307	Tmem86a	779.309	702.505	702.505	1275.98	854.249	713.266	863.208	841.574	-0.337362	0.227343	-1.48394	0.137826	0.22941
ENSMUSG00000010358	Ifi35	214.399	581.926	581.926	219.797	249.714	191	296.632	333.628	0.874786	0.348332	2.51136	0.0120267	0.0339951
ENSMUSG00000010362	Rdm1	61.3839	103.104	103.104	82.3211	47.2623	43.2734	61.7667	71.745	0.552577	0.35878	1.54015	0.123523	0.211122
ENSMUSG00000010376	Nedd8	520.429	849.297	849.297	464.291	563.621	602.844	553.612	629.056	0.422201	0.22582	1.86963	0.0615347	0.122247
ENSMUSG00000010392	Gosr1	191.269	304.069	304.069	184.399	225.73	211.145	215.802	233.783	0.329126	0.235933	1.395	0.163016	0.26145
ENSMUSG00000010406	Mrpl52	329.16	1039.78	1039.78	187.692	261.706	273.816	251.642	483.367	1.59257	0.364246	4.37223	1.22986e-05	0.000124806
ENSMUSG00000010453	Kansl3	499.967	489.307	489.307	234.615	174.941	195.477	176.912	322.932	1.31343	0.179577	7.31406	2.59188e-13	3.30032e-11
ENSMUSG00000010461	Eya4	33.8056	1.74752	1.74752	98.7854	53.611	29.8437	67.1045	40.9493	-1.55023	0.643696	-2.40832	0.0160261	0.0421685
ENSMUSG00000010517	Faf1	293.575	318.049	318.049	389.379	344.944	299.184	263.08	318.037	-0.0651594	0.201472	-0.323417	0.74638	0.819638
ENSMUSG00000010554	Mettl16	86.2933	71.6485	71.6485	133.36	83.9435	121.613	129.634	99.7344	-0.578124	0.282067	-2.0496	0.0404038	0.0879388
ENSMUSG00000010607	Pigyl	55.1566	181.743	181.743	57.6248	38.7974	45.5117	41.1778	85.9648	1.43783	0.421748	3.40922	0.00065149	0.00326879
ENSMUSG00000010608	Rbm25	1187.65	2902.64	2902.64	542.496	719.516	814.734	681.721	1393.06	1.66537	0.310272	5.36745	7.98577e-08	1.71863e-06
ENSMUSG00000010609	Psen2	184.152	300.574	300.574	159.703	191.165	189.508	200.551	218.032	0.473965	0.246136	1.92562	0.054152	0.1106
ENSMUSG00000010660	Plcd1	40.033	6.9901	6.9901	92.1997	23.2785	2.23828	24.4016	28.0187	-0.590699	0.678088	-0.871125	0.383686	0.501332
ENSMUSG00000010663	Fads1	233.081	160.772	160.772	349.042	304.736	220.844	306.546	247.97	-0.642788	0.253152	-2.53914	0.0111126	0.0318659
ENSMUSG00000010721	Lmbr1	8.89622	0	0	27.9892	26.1001	5.96875	16.7761	12.2472	-1.42773	0.689387	-2.07102	0.0383569	0.0843604
ENSMUSG00000010751	Tnfrsf22	27.5783	29.7079	29.7079	32.1052	25.3947	11.1914	12.2008	23.9837	0.444381	0.492329	0.902611	0.366732	0.484866
ENSMUSG00000010755	Cars	227.743	207.955	207.955	183.576	150.252	103.707	134.209	173.628	0.569165	0.252386	2.25513	0.0241249	0.0584196
ENSMUSG00000010911	Apip	63.1631	66.4059	66.4059	81.4979	100.873	121.613	98.3691	85.4755	-0.602321	0.270832	-2.22396	0.0261509	0.0619787
ENSMUSG00000010914	Pdhx	119.209	115.337	115.337	149.001	124.152	99.9766	99.8942	117.558	-0.0171702	0.254534	-0.0674571	0.946218	0.963674
ENSMUSG00000010936	Vac14	393.213	157.277	157.277	513.684	413.369	507.344	425.504	366.81	-0.908377	0.33665	-2.69829	0.00696976	0.021817
ENSMUSG00000011008	Mcoln2	107.644	173.005	173.005	185.223	143.903	220.098	138.784	163.095	-0.187154	0.289558	-0.646344	0.518056	0.628959
ENSMUSG00000011096	Akt1s1	87.1829	115.337	115.337	119.366	57.8434	64.1641	91.5061	92.9622	0.322472	0.337888	0.954375	0.339894	0.457353
ENSMUSG00000011114	Tbrg1	122.768	312.807	312.807	176.99	208.095	193.238	178.437	215.02	0.367162	0.331546	1.10743	0.26811	0.383845
ENSMUSG00000011148	Adssl1	1051.53	873.762	873.762	617.409	747.732	821.449	711.46	813.872	0.361713	0.16694	2.16672	0.0302562	0.0696257
ENSMUSG00000011158	Brf1	393.213	234.168	234.168	158.057	139.671	210.398	144.122	216.257	0.789194	0.282356	2.79504	0.00518938	0.0173184
ENSMUSG00000011179	Odc1	1992.75	1509.86	1509.86	378.677	948.068	889.344	1032.49	1180.15	0.983928	0.319307	3.08145	0.00205994	0.00827071
ENSMUSG00000011256	Adam19	132.554	138.054	138.054	224.737	124.152	135.789	122.008	145.05	-0.147585	0.293766	-0.50239	0.615393	0.713909
ENSMUSG00000011306	Sugp1	143.229	78.6386	78.6386	151.471	140.376	96.2461	145.647	119.178	-0.373416	0.322483	-1.15794	0.246889	0.360065
ENSMUSG00000011382	Dhdh	43.5915	48.9307	48.9307	49.3927	52.9056	44.7656	57.9539	49.4958	-0.121931	0.304284	-0.400714	0.688631	0.77451
ENSMUSG00000011427	Zfp790	54.2669	8.73762	8.73762	73.2658	29.6271	26.8594	34.3148	33.687	-0.562988	0.593718	-0.948242	0.343006	0.460557
ENSMUSG00000011752	Pgam1	1935.82	1338.6	1338.6	1695.82	2546.52	2920.21	2604.11	2054.24	-0.64589	0.238422	-2.70902	0.00674816	0.0212477
ENSMUSG00000011831	Evi5	219.737	179.995	179.995	357.274	227.847	242.48	221.14	232.638	-0.419775	0.250921	-1.67294	0.0943393	0.170708
ENSMUSG00000011832	Evi5l	57.8254	5.24257	5.24257	144.885	57.8434	54.4648	46.5156	53.1457	-1.22854	0.62187	-1.97556	0.0482047	0.100979
ENSMUSG00000011837	Snapc2	101.417	183.49	183.49	80.6747	41.6191	56.7031	65.5794	101.853	1.25946	0.343162	3.67017	0.000242388	0.00146061
ENSMUSG00000011877	Git1	53.3773	103.104	103.104	131.714	210.917	177.57	221.902	143.098	-1.05426	0.325986	-3.23408	0.00122036	0.005441
ENSMUSG00000011884	Gltp	1319.31	889.49	889.49	2053.09	1391.06	1337.75	1349.72	1318.56	-0.550434	0.238548	-2.30743	0.0210307	0.052337
ENSMUSG00000011958	Bnip2	737.496	706	706	1164.84	1099.03	1053.48	1069.1	933.707	-0.608146	0.116722	-5.21018	1.88653e-07	3.52152e-06
ENSMUSG00000011960	Ccnt1	315.816	263.876	263.876	227.206	231.374	337.234	285.957	275.048	0.0586664	0.222564	0.263594	0.792093	0.852804
ENSMUSG00000012076	Brms1l	41.8122	15.7277	15.7277	70.7962	53.611	66.4023	44.9905	44.1525	-1.08182	0.441551	-2.45006	0.0142833	0.0385223
ENSMUSG00000012114	Med15	516.87	211.45	211.45	578.718	650.386	686.406	664.945	502.889	-0.975257	0.322958	-3.01977	0.0025297	0.00970852
ENSMUSG00000012117	Dhdds	131.664	104.851	104.851	160.526	110.044	108.184	114.383	119.215	-0.101398	0.264472	-0.383397	0.701425	0.784862
ENSMUSG00000012126	Ubxn11	19.5717	134.559	134.559	9.87854	31.0379	22.3828	7.62551	51.3736	1.88909	0.583927	3.23515	0.00121577	0.00542505
ENSMUSG00000012296	Tjap1	108.534	101.356	101.356	36.2213	49.3785	62.6719	64.0543	74.7961	0.919839	0.303857	3.02722	0.00246818	0.00952369
ENSMUSG00000012405	Rpl15	451.928	461.346	461.346	305.411	458.515	514.805	491.846	449.314	0.0478406	0.221963	0.215535	0.82935	0.88047
ENSMUSG00000012422	Tmem167	536.442	505.034	505.034	401.727	419.012	422.289	483.457	467.571	0.255072	0.146376	1.74258	0.0814071	0.152572
ENSMUSG00000012428	Steap4	21.3509	0	0	19.7571	19.046	25.3672	23.6391	15.5943	-0.874778	0.692019	-1.2641	0.206196	0.313812
ENSMUSG00000012429	Mplkip	269.555	339.02	339.02	83.1443	131.206	98.4844	97.6066	194.005	1.5682	0.237911	6.59153	4.35303e-11	2.64546e-09
ENSMUSG00000012443	Kif11	24.0198	19.2228	19.2228	65.8569	81.1219	41.0352	49.5658	42.8636	-1.35828	0.402882	-3.3714	0.00074786	0.0036509
ENSMUSG00000012483	Rpa3	79.1763	85.6287	85.6287	49.3927	40.9136	77.5937	62.5292	68.6947	0.502725	0.322335	1.55963	0.118846	0.204732
ENSMUSG00000012519	Mlkl	43.5915	26.2129	26.2129	90.5532	89.5868	71.625	87.6934	62.2108	-1.2851	0.331123	-3.88103	0.000104016	0.000725737
ENSMUSG00000012535	Tnpo3	487.513	265.624	265.624	363.859	426.772	300.676	364.499	353.509	-0.0886227	0.275062	-0.322192	0.747307	0.820236
ENSMUSG00000012609	Ttll5	99.6376	6.9901	6.9901	55.1552	53.611	60.4336	30.502	44.7599	-0.266346	0.631782	-0.42158	0.673332	0.76187
ENSMUSG00000012640	Zfp715	110.313	50.6782	50.6782	171.228	93.8192	140.266	122.771	105.679	-0.812696	0.371651	-2.18672	0.0287633	0.0667937
ENSMUSG00000012819	Cdh23	120.989	103.104	103.104	31.282	18.3406	24.6211	27.4518	61.2703	1.99851	0.314018	6.36431	1.96172e-10	1.0098e-08
ENSMUSG00000012848	Rps5	709.918	924.44	924.44	618.232	737.151	838.609	814.405	795.314	0.175351	0.186796	0.938729	0.34787	0.465451
ENSMUSG00000013076	Amotl1	9.78584	1.74752	1.74752	73.2658	13.4027	14.1758	12.2008	18.0466	-1.63882	0.665177	-2.46373	0.0137499	0.0374316
ENSMUSG00000013089	Etv5	155.684	47.1832	47.1832	316.113	296.977	203.684	260.03	189.55	-1.50704	0.412473	-3.65367	0.000258519	0.00153618
ENSMUSG00000013155	Enkd1	16.0132	33.203	33.203	11.525	14.8136	10.4453	16.7761	19.4256	0.871926	0.47945	1.81859	0.0689732	0.134012
ENSMUSG00000013160	Atp6v0d1	591.598	1106.18	1106.18	418.191	501.545	561.062	558.188	691.85	0.840914	0.258758	3.24981	0.00115481	0.00520515
ENSMUSG00000013236	Ptprs	143.229	155.53	155.53	248.61	294.86	223.082	224.953	206.542	-0.699697	0.204725	-3.41775	0.000631418	0.00319624
ENSMUSG00000013275	Slc41a1	64.0528	12.2327	12.2327	49.3927	62.7813	70.1328	73.2049	49.1471	-0.886462	0.52723	-1.68136	0.0926931	0.168162
ENSMUSG00000013419	Zfp651	10.6755	0	0	31.282	6.34867	13.4297	19.8263	11.6517	-1.1934	0.693915	-1.7198	0.085468	0.158374
ENSMUSG00000013465	Nelfb	268.666	169.51	169.51	301.295	274.404	200.699	240.204	232.041	-0.304884	0.264072	-1.15455	0.248275	0.361545
ENSMUSG00000013495	Tmem175	90.7414	111.842	111.842	235.438	167.182	184.285	231.816	161.878	-0.944251	0.243054	-3.88494	0.000102354	0.000716008
ENSMUSG00000013539	Tango2	190.379	162.52	162.52	203.333	120.625	132.805	173.099	163.611	0.126468	0.262885	0.481077	0.630461	0.726348
ENSMUSG00000013584	Aldh1a2	22.2405	1.74752	1.74752	1.64642	26.8055	5.96875	17.5387	11.0993	-0.305374	0.695174	-0.439278	0.66046	0.75224
ENSMUSG00000013593	Ndufs2	427.908	456.104	456.104	620.701	411.253	436.465	520.822	475.622	-0.152111	0.200422	-0.758951	0.447882	0.563328
ENSMUSG00000013622	Atraid	398.551	678.039	678.039	656.923	350.588	371.555	438.467	510.309	0.344914	0.29534	1.16785	0.242866	0.355167
ENSMUSG00000013629	Cad	49.8188	0	0	39.5141	74.7732	68.6406	59.479	41.7465	-1.01319	0.693681	-1.46061	0.144124	0.237746
ENSMUSG00000013646	Sh3bp5l	80.066	0	0	103.725	69.8354	88.0391	79.3053	60.1386	-0.57322	0.67456	-0.849769	0.395454	0.512111
ENSMUSG00000013662	Atad1	194.827	169.51	169.51	291.417	326.604	322.312	387.376	265.937	-0.875689	0.193239	-4.53164	5.85275e-06	6.6526e-05
ENSMUSG00000013663	Pten	1106.69	905.218	905.218	988.677	992.509	1230.31	998.18	1018.11	-0.110053	0.163346	-0.673742	0.500475	0.612972
ENSMUSG00000013698	Pea15a	1005.27	887.742	887.742	845.438	638.394	588.668	628.342	783.086	0.450909	0.182402	2.47206	0.0134336	0.0367953
ENSMUSG00000013701	Timm23	197.496	260.381	260.381	209.096	258.885	272.324	217.327	239.413	-0.00806051	0.21293	-0.0378551	0.969803	0.979375
ENSMUSG00000013707	Tnfaip8l2	456.376	263.876	263.876	550.728	396.439	327.535	463.631	388.923	-0.381709	0.282977	-1.34891	0.177367	0.278988
ENSMUSG00000013736	Trnt1	214.399	202.713	202.713	212.389	246.893	198.461	203.601	211.595	-0.056602	0.184649	-0.306538	0.759195	0.829117
ENSMUSG00000013787	Ehmt2	166.359	227.178	227.178	227.206	237.017	267.848	211.989	223.539	-0.195546	0.211498	-0.924573	0.355188	0.472818
ENSMUSG00000013822	Elof1	131.664	103.104	103.104	123.482	149.546	126.836	141.835	125.653	-0.246569	0.229834	-1.07281	0.283355	0.400411
ENSMUSG00000013833	Med16	160.132	10.4851	10.4851	278.245	232.785	167.871	251.642	158.806	-1.44075	0.603527	-2.38722	0.0169762	0.0440616
ENSMUSG00000013846	St3gal1	189.489	349.505	349.505	132.537	169.298	158.172	131.921	211.49	0.952092	0.278341	3.42059	0.000624843	0.00316745
ENSMUSG00000013858	Tmem259	89.8518	220.188	220.188	95.4925	84.6489	99.9766	102.182	130.361	0.820293	0.342838	2.39266	0.0167268	0.0436133
ENSMUSG00000013878	Rnf170	56.0462	68.1534	68.1534	118.542	71.2462	88.0391	64.8169	76.4282	-0.400394	0.32417	-1.23514	0.21678	0.326805
ENSMUSG00000013973	Dedd	40.033	6.9901	6.9901	38.6909	17.6352	20.1445	32.0272	23.2159	-0.412467	0.592046	-0.69668	0.486003	0.59963
ENSMUSG00000013974	Mcemp1	117.43	66.4059	66.4059	48.5695	78.3003	73.1172	96.844	78.1533	0.170609	0.361294	0.472216	0.636773	0.732042
ENSMUSG00000013997	Nit1	72.0594	127.569	127.569	88.0836	83.2381	79.832	83.1181	94.4957	0.35051	0.291744	1.20143	0.229585	0.340909
ENSMUSG00000014039	Prdm15	98.748	38.4455	38.4455	39.5141	28.2163	35.0664	27.4518	43.6983	0.777616	0.436889	1.77989	0.0750932	0.143223
ENSMUSG00000014074	Rnf168	90.7414	152.035	152.035	83.9676	148.841	135.043	101.419	123.44	0.145628	0.319801	0.45537	0.648843	0.742011
ENSMUSG00000014075	Tctex1d2	205.503	178.247	178.247	105.371	177.763	162.648	159.373	166.736	0.300435	0.251963	1.19238	0.233114	0.344723
ENSMUSG00000014077	Chp1	492.85	342.515	342.515	646.221	567.148	669.246	664.945	532.206	-0.676004	0.196383	-3.44228	0.000576841	0.00297487
ENSMUSG00000014158	Trpv4	53.3773	6.9901	6.9901	210.742	98.7571	99.9766	70.1547	78.1411	-1.84333	0.576133	-3.19949	0.00137671	0.0060035
ENSMUSG00000014177	Tvp23b	71.1697	59.4158	59.4158	160.526	137.555	157.426	153.273	114.112	-1.21292	0.234899	-5.1636	2.42247e-07	4.37682e-06
ENSMUSG00000014195	Dnajc7	348.732	155.53	155.53	410.782	457.104	357.379	389.664	324.96	-0.818782	0.313611	-2.61082	0.00903249	0.0269488
ENSMUSG00000014226	Cacybp	384.317	394.94	394.94	497.22	459.22	515.551	610.041	465.176	-0.406057	0.166259	-2.44231	0.0145935	0.0392093
ENSMUSG00000014232	Cluap1	32.916	43.6881	43.6881	37.0445	24.6893	43.2734	25.9267	35.8895	0.257722	0.387433	0.665204	0.50592	0.618154
ENSMUSG00000014243	Zswim7	48.9292	85.6287	85.6287	15.641	31.0379	41.0352	38.1276	49.4326	1.08869	0.419521	2.59507	0.0094573	0.0280208
ENSMUSG00000014245	Pigl	31.1368	61.1633	61.1633	31.282	21.8676	41.0352	33.5523	40.1715	0.598791	0.407926	1.46789	0.142133	0.235006
ENSMUSG00000014294	Ndufa2	617.398	1520.35	1520.35	401.727	447.229	470.039	438.467	773.65	1.39826	0.303095	4.61327	3.96385e-06	4.79066e-05
ENSMUSG00000014301	Pam16	49.8188	106.599	106.599	57.6248	38.092	44.0195	36.6025	62.7651	0.900887	0.377121	2.38885	0.0169011	0.0438994
ENSMUSG00000014313	Cox6c	1344.22	2502.45	2502.45	684.912	822.505	888.598	731.287	1353.78	1.38866	0.248357	5.5914	2.2525e-08	5.87629e-07
ENSMUSG00000014349	Ube2z	147.677	178.247	178.247	172.051	149.546	161.902	176.149	166.26	0.0186714	0.199417	0.09363	0.925403	0.948731
ENSMUSG00000014353	Tmem87b	755.289	845.802	845.802	549.905	423.245	486.453	397.289	614.826	0.799251	0.174748	4.57373	4.7912e-06	5.58851e-05
ENSMUSG00000014355	Anapc1	399.44	131.064	131.064	313.644	428.888	290.977	358.399	293.354	-0.593571	0.388878	-1.52637	0.126919	0.215822
ENSMUSG00000014361	Mertk	511.533	277.856	277.856	681.619	495.902	727.441	563.525	505.105	-0.755153	0.277208	-2.72414	0.00644691	0.020541
ENSMUSG00000014402	Tsg101	298.023	276.109	276.109	474.17	409.842	403.637	414.828	364.674	-0.575322	0.156332	-3.68012	0.000233124	0.00141515
ENSMUSG00000014418	Hps5	179.704	202.713	202.713	195.101	224.32	149.965	212.752	195.324	-0.00749471	0.223064	-0.0335989	0.973197	0.98164
ENSMUSG00000014426	Map3k4	24.0198	69.901	69.901	73.2658	100.168	114.152	64.8169	73.7464	-0.64228	0.419648	-1.53052	0.125888	0.214342
ENSMUSG00000014444	Piezo1	527.546	889.49	889.49	382.793	556.567	596.129	473.544	616.508	0.589801	0.25655	2.29897	0.0215064	0.0533101
ENSMUSG00000014470	Rnf166	162.801	146.792	146.792	252.726	177.763	232.781	175.387	185.006	-0.44505	0.233026	-1.90987	0.0561495	0.113831
ENSMUSG00000014496	Ankrd28	498.188	354.747	354.747	149.824	191.165	196.223	157.086	271.712	1.18666	0.224005	5.29749	1.17403e-07	2.37381e-06
ENSMUSG00000014498	Ankrd52	128.106	41.9406	41.9406	60.0944	80.4165	64.9102	59.479	68.1267	0.104334	0.43419	0.240297	0.8101	0.86631
ENSMUSG00000014503	Pkd2l2	20.4613	5.24257	5.24257	13.9946	18.3406	9.69922	14.4885	12.4956	-0.294402	0.590396	-0.498652	0.618024	0.716034
ENSMUSG00000014504	Srp19	247.315	442.124	442.124	255.196	229.258	220.098	273.756	301.41	0.597104	0.256418	2.32864	0.0198783	0.0500278
ENSMUSG00000014547	Wdfy2	135.223	87.3762	87.3762	105.371	88.176	108.184	94.5564	100.895	0.0759088	0.274635	0.276398	0.782242	0.845735
ENSMUSG00000014550	Rbsn	142.339	134.559	134.559	269.19	147.43	116.391	122.771	152.463	-0.239322	0.339492	-0.704942	0.480846	0.594994
ENSMUSG00000014551	Mrps25	86.2933	159.025	159.025	102.078	93.8192	120.121	132.684	121.864	0.23914	0.304144	0.786273	0.431708	0.547362
ENSMUSG00000014554	Dguok	123.657	78.6386	78.6386	124.305	102.99	73.1172	105.232	98.0826	-0.0936186	0.312327	-0.299745	0.764372	0.832779
ENSMUSG00000014592	Camta1	89.8518	162.52	162.52	44.4534	53.611	72.3711	47.2782	90.3721	1.25281	0.334601	3.7442	0.000180969	0.0011474
ENSMUSG00000014599	Csf1	38.2537	10.4851	10.4851	18.9339	5.64326	41.7812	16.7761	20.3369	-0.0305395	0.619819	-0.0492716	0.960703	0.974102
ENSMUSG00000014601	Strip1	238.419	132.812	132.812	221.444	220.793	236.512	189.113	195.986	-0.339889	0.27507	-1.23565	0.216589	0.326747
ENSMUSG00000014606	Slc25a11	509.753	611.633	611.633	622.348	588.31	553.602	664.182	594.495	-0.0747812	0.154712	-0.483356	0.628843	0.725025
ENSMUSG00000014633	Cmc2	50.7084	195.723	195.723	60.9176	48.6731	28.3516	59.479	91.3679	1.37551	0.462771	2.97234	0.00295538	0.010983
ENSMUSG00000014668	Chfr	298.023	361.738	361.738	189.339	169.298	187.27	201.314	252.674	0.846486	0.179279	4.72161	2.33983e-06	3.03561e-05
ENSMUSG00000014686	Ceacam16	11.5651	33.203	33.203	1.64642	7.75949	10.4453	10.6757	15.4997	1.32406	0.59986	2.20728	0.0272946	0.0640648
ENSMUSG00000014748	Tex261	266.887	340.767	340.767	474.17	431.71	438.703	403.39	385.199	-0.467393	0.173046	-2.70097	0.00691377	0.0216783
ENSMUSG00000014763	Fam120b	161.022	92.6188	92.6188	156.41	120.625	124.598	167.761	130.808	-0.271481	0.299364	-0.906859	0.364481	0.482427
ENSMUSG00000014767	Tbp	147.677	43.6881	43.6881	97.9622	111.454	108.184	115.145	95.3998	-0.395541	0.430376	-0.919061	0.358064	0.475758
ENSMUSG00000014769	Psmb1	743.724	1118.42	1118.42	803.454	875.411	811.004	976.066	920.927	0.190232	0.199061	0.955647	0.33925	0.456948
ENSMUSG00000014778	Fhod1	56.0462	47.1832	47.1832	28.8124	50.7894	49.2422	41.1778	45.7763	0.227747	0.350073	0.650569	0.515325	0.626496
ENSMUSG00000014846	Tppp3	644.976	1036.28	1036.28	2727.3	717.4	485.707	834.994	1068.99	-0.345568	0.465199	-0.742838	0.45758	0.572899
ENSMUSG00000014850	Msh3	86.2933	61.1633	61.1633	75.7354	76.184	72.3711	48.8033	68.8163	0.0394321	0.316446	0.124609	0.900833	0.933383
ENSMUSG00000014856	Tmem208	305.14	578.43	578.43	198.394	175.647	205.922	219.615	323.083	1.23226	0.267319	4.6097	4.03253e-06	4.83737e-05
ENSMUSG00000014859	E2f4	104.975	106.599	106.599	128.421	167.182	142.504	151.748	129.718	-0.465394	0.219301	-2.12217	0.0338234	0.0762263
ENSMUSG00000014867	Surf4	1305.08	919.198	919.198	1454.61	1293.72	1227.32	1371.07	1212.88	-0.341787	0.182611	-1.87166	0.0612531	0.121868
ENSMUSG00000014873	Surf2	180.593	71.6485	71.6485	129.244	106.517	113.406	93.7938	109.55	-0.0165067	0.375286	-0.0439843	0.964917	0.97605
ENSMUSG00000014905	Dnajb9	72.0594	47.1832	47.1832	134.183	155.895	197.715	157.086	115.901	-1.44517	0.289284	-4.99567	5.86324e-07	9.31846e-06
ENSMUSG00000014956	Ppp1cb	367.414	344.262	344.262	476.639	486.731	482.723	492.608	427.806	-0.454046	0.133346	-3.40503	0.000661568	0.00330352
ENSMUSG00000014959	Gorasp2	466.162	244.653	244.653	579.541	524.118	498.391	565.05	446.081	-0.728638	0.266128	-2.73792	0.00618285	0.0198769
ENSMUSG00000014980	Tsen15	34.6953	8.73762	8.73762	45.2766	45.8515	37.3047	49.5658	32.8813	-1.08778	0.505204	-2.15315	0.031307	0.0714329
ENSMUSG00000015002	Efr3a	479.506	169.51	169.51	753.238	572.791	540.918	663.42	478.413	-1.1169	0.362807	-3.07848	0.00208057	0.00833469
ENSMUSG00000015013	Trappc2l	275.783	522.51	522.51	209.096	246.187	269.34	234.866	325.756	0.837142	0.267972	3.12399	0.00178418	0.00737103
ENSMUSG00000015023	Ddx19a	21.3509	45.4356	45.4356	27.166	31.0379	31.3359	58.7164	37.2112	-0.00831932	0.450293	-0.0184753	0.98526	0.989544
ENSMUSG00000015027	Galns	339.836	179.995	179.995	339.986	405.609	381.254	416.353	320.433	-0.685952	0.272666	-2.51573	0.0118788	0.0336566
ENSMUSG00000015087	Rabl6	232.191	251.643	251.643	167.935	144.609	185.777	164.711	199.787	0.551807	0.187458	2.94362	0.00324396	0.0118394
ENSMUSG00000015092	Edf1	554.234	884.247	884.247	499.689	637.689	628.957	601.653	670.102	0.373609	0.220407	1.69509	0.0900591	0.164552
ENSMUSG00000015094	Npdc1	13.3443	0	0	10.7017	26.8055	11.9375	23.6391	12.3469	-1.08049	0.69188	-1.56167	0.118365	0.2041
ENSMUSG00000015095	Fbxw5	190.379	34.9505	34.9505	152.294	166.476	161.156	186.063	132.324	-0.783995	0.497898	-1.57461	0.115347	0.200154
ENSMUSG00000015112	Slc25a13	50.7084	69.901	69.901	85.614	90.2922	52.2266	52.616	67.3227	-0.145362	0.348711	-0.416856	0.676784	0.764401
ENSMUSG00000015120	Ube2i	1581.75	1242.49	1242.49	914.588	969.23	996.781	1034.02	1140.19	0.467065	0.150889	3.09541	0.00196541	0.00798406
ENSMUSG00000015126	Tsr3	36.4745	80.3861	80.3861	51.0391	49.3785	34.3203	38.8901	52.9821	0.531091	0.387445	1.37075	0.170452	0.270137
ENSMUSG00000015127	Unkl	32.916	1.74752	1.74752	69.973	24.6893	34.3203	32.7897	28.3119	-1.12359	0.653674	-1.71888	0.0856362	0.158526
ENSMUSG00000015133	Lrrk1	342.504	281.351	281.351	257.665	332.952	344.695	269.181	301.386	0.00737088	0.202389	0.0364194	0.970948	0.980204
ENSMUSG00000015143	Actn1	37.3641	36.698	36.698	51.0391	71.2462	78.3398	89.2185	57.2291	-0.913017	0.335044	-2.72507	0.00642881	0.0205036
ENSMUSG00000015149	Sirt2	630.742	422.901	422.901	752.415	569.264	630.449	551.325	568.571	-0.332176	0.221896	-1.49699	0.134396	0.22508
ENSMUSG00000015165	Hnrnpl	520.429	678.039	678.039	419.015	576.318	666.262	650.456	598.365	0.108169	0.222409	0.48635	0.626719	0.723674
ENSMUSG00000015176	Nolc1	107.644	80.3861	80.3861	213.212	227.847	273.816	224.953	172.606	-1.33594	0.231785	-5.76373	8.22735e-09	2.48791e-07
ENSMUSG00000015189	Casd1	103.196	104.851	104.851	156.41	152.368	187.27	195.976	143.56	-0.712304	0.221144	-3.221	0.00127745	0.0056368
ENSMUSG00000015202	Cnksr3	37.3641	45.4356	45.4356	31.282	20.4568	30.5898	23.6391	33.4576	0.63152	0.369024	1.71132	0.0870212	0.160341
ENSMUSG00000015214	Mtmr1	134.333	8.73762	8.73762	186.869	167.887	264.863	245.541	145.281	-1.54735	0.604053	-2.56162	0.0104187	0.0302738
ENSMUSG00000015217	Hmgb3	10.6755	26.2129	26.2129	28.8124	28.9217	29.8437	35.8399	26.6456	-0.528968	0.446831	-1.18382	0.236484	0.348311
ENSMUSG00000015243	Abca1	5809.23	4082.22	4082.22	2626.87	3661.77	4257.21	3745.65	4037.88	0.373239	0.22136	1.68611	0.0917742	0.166805
ENSMUSG00000015247	Nipsnap3b	465.272	223.683	223.683	596.828	490.258	608.066	541.411	449.886	-0.829687	0.29046	-2.85646	0.00428393	0.0147714
ENSMUSG00000015289	Lage3	122.768	255.139	255.139	85.614	71.2462	75.3555	89.2185	136.354	1.30994	0.315261	4.1551	3.25147e-05	0.000278222
ENSMUSG00000015290	Ubl4a	249.094	445.619	445.619	179.46	195.398	123.852	140.309	254.193	1.18988	0.289186	4.1146	3.8786e-05	0.000321528
ENSMUSG00000015291	Gdi1	1097.79	819.589	819.589	409.136	472.623	431.242	492.608	648.94	1.00141	0.179077	5.59203	2.24427e-08	5.86912e-07
ENSMUSG00000015305	Sash1	542.669	1957.23	1957.23	358.92	426.066	396.922	368.312	858.192	1.79155	0.370213	4.83924	1.30339e-06	1.85633e-05
ENSMUSG00000015312	Gadd45b	897.628	1343.85	1343.85	1346.77	1140.64	1401.16	1200.26	1239.17	-0.0908468	0.196845	-0.461514	0.64443	0.738381
ENSMUSG00000015314	Slamf6	84.5141	59.4158	59.4158	58.448	114.276	109.676	125.058	87.2577	-0.537762	0.349706	-1.53776	0.124108	0.211953
ENSMUSG00000015335	Zdhhc12	29.3575	75.1435	75.1435	36.2213	55.0218	35.0664	35.0774	48.7188	0.492893	0.421445	1.16953	0.24219	0.354421
ENSMUSG00000015337	Endog	32.916	45.4356	45.4356	18.1106	9.87571	27.6055	20.5889	28.5669	0.97863	0.4485	2.18201	0.029109	0.0674795
ENSMUSG00000015340	Cybb	1273.94	1598.98	1598.98	3960.47	4461	3053.02	4682.83	2947.03	-1.41027	0.196983	-7.15935	8.106e-13	9.03144e-11
ENSMUSG00000015341	Golga7	670.775	653.574	653.574	623.994	666.61	692.375	676.383	662.469	-0.0113034	0.121663	-0.0929072	0.925977	0.948956
ENSMUSG00000015354	Pcolce2	12.4547	3.49505	3.49505	195.101	3.52704	14.1758	12.2008	34.9214	-1.64037	0.693276	-2.36611	0.0179759	0.0461302
ENSMUSG00000015355	Cd48	827.348	770.658	770.658	1160.73	1387.54	1284.03	1379.46	1082.92	-0.714601	0.133351	-5.3588	8.37771e-08	1.77091e-06
ENSMUSG00000015357	Clpx	144.119	230.673	230.673	232.146	223.614	184.285	180.725	203.748	-0.0331589	0.251612	-0.131786	0.895154	0.929659
ENSMUSG00000015363	Trabd	205.503	146.792	146.792	199.217	155.895	193.984	137.259	169.349	-0.0329283	0.254682	-0.129292	0.897126	0.931034
ENSMUSG00000015377	Dennd6b	53.3773	75.1435	75.1435	9.05532	7.05408	29.8437	7.62551	36.749	1.94709	0.522956	3.72325	0.000196675	0.00122616
ENSMUSG00000015396	Cd83	3328.96	3814.85	3814.85	5084.98	2116.22	1878.66	2475.24	3216.25	0.319073	0.326279	0.977914	0.328117	0.445939
ENSMUSG00000015461	Atf6b	208.172	97.8614	97.8614	350.688	330.836	353.648	359.162	256.89	-1.28819	0.298675	-4.313	1.61055e-05	0.000155193
ENSMUSG00000015474	Ppt2	47.15	76.8911	76.8911	71.6194	95.23	77.5937	97.6066	77.5688	-0.354643	0.309577	-1.14557	0.251972	0.365996
ENSMUSG00000015478	Rnf5	209.061	417.658	417.658	208.272	165.771	120.867	161.661	242.993	1.0234	0.311446	3.28597	0.00101631	0.00468149
ENSMUSG00000015488	Cacfd1	119.209	232.421	232.421	103.725	73.3624	108.93	80.0679	135.734	1.02114	0.319292	3.19814	0.00138316	0.00602372
ENSMUSG00000015501	Hivep2	143.229	213.198	213.198	130.067	95.9355	109.676	97.6066	143.273	0.773364	0.256862	3.01082	0.00260545	0.00993508
ENSMUSG00000015522	Arnt	474.168	340.767	340.767	247.787	332.952	325.297	324.847	340.941	0.321726	0.215736	1.49129	0.135885	0.226992
ENSMUSG00000015536	Mocs2	328.27	344.262	344.262	333.401	232.079	255.164	234.103	295.935	0.354267	0.202486	1.74958	0.0801905	0.150741
ENSMUSG00000015542	Nat9	122.768	138.054	138.054	140.769	95.23	70.8789	67.8671	110.517	0.475342	0.324005	1.46708	0.142354	0.235334
ENSMUSG00000015568	Lpl	514.201	415.911	415.911	1423.33	1118.07	1081.84	1130.1	871.338	-1.37715	0.177958	-7.73862	1.00503e-14	1.79163e-12
ENSMUSG00000015575	Atp6v0e	2293.44	3550.97	3550.97	1125.33	1427.75	1807.78	1632.62	2198.41	1.03204	0.234835	4.39472	1.10914e-05	0.000114401
ENSMUSG00000015597	Zfp318	51.5981	75.1435	75.1435	62.5641	48.6731	67.1484	64.0543	63.475	0.127952	0.305899	0.418283	0.67574	0.763625
ENSMUSG00000015605	Srf	96.0792	162.52	162.52	116.896	123.446	105.945	108.282	125.098	0.278838	0.270808	1.02965	0.303172	0.420533
ENSMUSG00000015656	Hspa8	3022.05	1958.97	1958.97	4160.51	4150.62	3953.55	4154.38	3337.01	-0.809701	0.192485	-4.20656	2.59288e-05	0.000232065
ENSMUSG00000015659	Serac1	54.2669	15.7277	15.7277	40.3374	35.9758	44.0195	26.6893	33.2492	-0.272551	0.499611	-0.545527	0.585391	0.688111
ENSMUSG00000015668	Pdzd11	130.774	110.094	110.094	155.587	136.849	152.203	133.446	132.721	-0.287268	0.214402	-1.33986	0.180292	0.282379
ENSMUSG00000015671	Psma2	757.068	526.005	526.005	927.759	943.836	1102.73	1188.82	853.174	-0.765788	0.202614	-3.77953	0.000157124	0.00101957
ENSMUSG00000015672	Mrpl32	192.158	164.267	164.267	119.366	179.174	177.57	184.537	168.763	0.0731807	0.242139	0.302226	0.76248	0.831514
ENSMUSG00000015697	Setdb1	220.626	145.045	145.045	350.688	184.111	211.145	182.25	205.558	-0.414699	0.317335	-1.30682	0.191275	0.295605
ENSMUSG00000015702	Anxa9	27.5783	47.1832	47.1832	17.2874	29.6271	29.8437	41.9403	34.3776	0.38844	0.431759	0.899667	0.368297	0.486395
ENSMUSG00000015711	Prune	76.5075	103.104	103.104	55.9784	51.4948	65.6562	68.6296	74.9249	0.602527	0.280731	2.14628	0.0318508	0.0725152
ENSMUSG00000015714	Cers2	1911.8	1256.47	1256.47	1431.56	1398.12	1463.09	1439.7	1451.03	0.0432492	0.192126	0.225108	0.821895	0.874619
ENSMUSG00000015733	Capza2	3377.89	2194.89	2194.89	4508.73	5152.3	4734.71	5334.81	3928.32	-0.909376	0.198462	-4.58212	4.60285e-06	5.41607e-05
ENSMUSG00000015745	Plekho1	261.549	519.015	519.015	296.356	305.442	401.398	436.179	391.279	0.25067	0.292159	0.857992	0.390897	0.508086
ENSMUSG00000015747	Vps45	94.2999	192.228	192.228	143.239	123.446	102.215	122.771	138.632	0.345774	0.312656	1.10593	0.268758	0.384567
ENSMUSG00000015748	Prpf3	102.307	24.4653	24.4653	157.233	110.749	94.7539	114.383	89.7652	-1.04771	0.477514	-2.19409	0.0282288	0.0658816
ENSMUSG00000015749	Anp32e	241.088	297.079	297.079	498.043	489.553	408.113	382.801	373.394	-0.668306	0.19249	-3.4719	0.000516784	0.00272292
ENSMUSG00000015750	Aph1a	131.664	206.208	206.208	215.681	165.771	138.773	162.423	175.247	0.0756738	0.270253	0.280011	0.779469	0.84359
ENSMUSG00000015755	Tab2	162.801	484.064	484.064	251.903	219.382	307.391	219.615	304.174	0.547876	0.360604	1.51933	0.12868	0.217985
ENSMUSG00000015757	Ppil4	237.529	150.287	150.287	225.56	227.847	258.148	223.428	210.441	-0.356593	0.239637	-1.48805	0.136737	0.228144
ENSMUSG00000015759	Cnih1	239.308	267.371	267.371	368.799	289.217	358.871	352.299	306.177	-0.404734	0.17787	-2.27545	0.0228788	0.0560424
ENSMUSG00000015766	Eps8	1287.28	919.198	919.198	1275.15	718.81	609.559	465.156	884.908	0.416636	0.33001	1.2625	0.206771	0.314508
ENSMUSG00000015776	Med22	240.198	64.6584	64.6584	282.361	126.973	123.852	105.232	143.99	-0.310244	0.489044	-0.634388	0.525828	0.635652
ENSMUSG00000015790	Surf1	104.086	76.8911	76.8911	149.824	135.438	80.5781	99.1317	103.263	-0.401338	0.31771	-1.26322	0.20651	0.314155
ENSMUSG00000015804	Med28	343.394	555.713	555.713	258.488	289.217	264.863	298.92	366.615	0.776197	0.225761	3.43813	0.000585743	0.00301062
ENSMUSG00000015806	Qdpr	188.6	251.643	251.643	202.51	129.795	158.918	164.711	192.546	0.471725	0.241807	1.95083	0.0510767	0.105875
ENSMUSG00000015837	Sqstm1	4537.07	3530	3530	4325.15	3239.23	2920.96	3020.47	3586.13	0.191861	0.197592	0.970998	0.331549	0.449518
ENSMUSG00000015839	Nfe2l2	1500.79	1382.29	1382.29	1704.05	1859.45	1977.89	2039.82	1692.37	-0.4102	0.126655	-3.23872	0.00120068	0.00537116
ENSMUSG00000015846	Rxra	79.1763	20.9703	20.9703	144.062	181.995	205.176	209.702	123.15	-1.91304	0.440331	-4.34455	1.39558e-05	0.000138381
ENSMUSG00000015850	Adamtsl4	65.832	118.832	118.832	55.1552	104.4	117.137	99.1317	97.0456	0.0871557	0.359605	0.242365	0.808497	0.865201
ENSMUSG00000015852	Fcrls	1311.3	1195.31	1195.31	281.538	1232.35	1591.42	1340.57	1163.97	0.135666	0.421505	0.32186	0.747559	0.8203
ENSMUSG00000015854	Cd5l	64.0528	255.139	255.139	18.1106	36.6812	27.6055	35.0774	98.8292	2.36117	0.463087	5.09875	3.41905e-07	5.93671e-06
ENSMUSG00000015869	Prpsap1	218.847	228.926	228.926	296.356	193.282	193.238	195.976	222.221	0.0367487	0.236063	0.155673	0.876291	0.915134
ENSMUSG00000015880	Ncapg	24.0198	33.203	33.203	46.0998	69.8354	24.6211	55.6662	40.9497	-0.638275	0.43658	-1.46199	0.143744	0.237304
ENSMUSG00000015882	Lcorl	368.303	319.797	319.797	182.753	244.776	198.461	157.848	255.962	0.760672	0.217102	3.50376	0.000458742	0.00246568
ENSMUSG00000015889	Lta4h	424.35	354.747	354.747	400.081	380.92	349.918	388.139	378.986	-0.000544149	0.159563	-0.00341024	0.997279	0.998388
ENSMUSG00000015932	Dstn	935.882	901.722	901.722	1822.59	1387.54	1338.49	1489.26	1253.89	-0.714778	0.160748	-4.44658	8.72485e-06	9.37899e-05
ENSMUSG00000015937	H2afy	659.21	1001.33	1001.33	723.603	889.519	917.695	1025.63	888.332	-0.0058731	0.216843	-0.0270846	0.978392	0.984822
ENSMUSG00000015942	Gtf2ird2	69.3905	103.104	103.104	60.9176	47.9677	38.7969	54.1411	68.2031	0.807812	0.314569	2.568	0.0102288	0.0298356
ENSMUSG00000015943	Bola1	64.0528	99.6089	99.6089	42.807	26.1001	44.7656	61.0041	62.5639	0.921133	0.374329	2.46075	0.0138645	0.037715
ENSMUSG00000015944	Gatsl2	129.885	136.307	136.307	101.255	188.344	187.27	170.049	149.917	-0.260457	0.282664	-0.921434	0.356824	0.474582
ENSMUSG00000015947	Fcgr1	1048.86	1015.31	1015.31	1078.41	1727.54	1271.34	1796.57	1279.05	-0.503765	0.217216	-2.31919	0.0203848	0.0510982
ENSMUSG00000015950	Ncf1	1702.74	1242.49	1242.49	2648.27	1912.36	1557.84	1968.91	1753.59	-0.518508	0.227176	-2.2824	0.0224657	0.0552799
ENSMUSG00000015957	Wnt11	31.1368	1.74752	1.74752	7.4089	1.41082	4.47656	4.57531	7.50049	0.799904	0.695856	1.14952	0.25034	0.364205
ENSMUSG00000015961	Adss	318.485	393.193	393.193	458.529	415.485	481.23	402.627	408.963	-0.256965	0.170413	-1.5079	0.131581	0.221607
ENSMUSG00000015968	Cacna1d	265.997	330.282	330.282	189.339	162.949	156.68	210.464	235.142	0.758165	0.206933	3.66383	0.000248473	0.00148889
ENSMUSG00000015971	Actr8	99.6376	27.9604	27.9604	165.465	137.555	146.98	118.195	103.393	-1.2636	0.437548	-2.88791	0.00387811	0.0136493
ENSMUSG00000015980	Lrrc27	20.4613	87.3762	87.3762	23.8731	6.34867	18.6523	18.3012	37.4842	1.58202	0.546448	2.8951	0.00379032	0.0133975
ENSMUSG00000015994	Fnta	184.152	101.356	101.356	393.495	210.212	259.641	255.455	215.095	-1.04059	0.32294	-3.22223	0.00127195	0.00561718
ENSMUSG00000016018	Skiv2l2	164.58	227.178	227.178	223.913	329.425	316.344	298.158	255.254	-0.49525	0.234113	-2.11543	0.034393	0.0772343
ENSMUSG00000016024	Lbp	104.086	29.7079	29.7079	65.8569	34.565	66.4023	32.0272	51.7647	0.132388	0.505788	0.261746	0.793518	0.854213
ENSMUSG00000016087	Fli1	512.422	454.356	454.356	886.599	590.426	716.25	754.163	624.082	-0.622863	0.189334	-3.28975	0.00100275	0.00462642
ENSMUSG00000016206	H2-M3	291.796	152.035	152.035	422.307	380.215	294.707	462.106	307.886	-0.915084	0.298845	-3.06207	0.00219813	0.00868532
ENSMUSG00000016239	Lonrf3	195.717	316.302	316.302	107.017	78.3003	121.613	91.5061	175.251	1.40485	0.277894	5.05537	4.29566e-07	7.13453e-06
ENSMUSG00000016252	Atp5e	823.79	2588.08	2588.08	343.279	473.329	464.816	428.554	1101.42	2.07513	0.35171	5.90011	3.63264e-09	1.22296e-07
ENSMUSG00000016253	Nelfcd	178.814	17.4752	17.4752	228.853	208.801	142.504	146.41	134.333	-1.03924	0.577344	-1.80004	0.0718546	0.138209
ENSMUSG00000016256	Ctsz	4203.46	4599.48	4599.48	5494.11	6285.18	5706.87	6418.39	5329.57	-0.4172	0.118881	-3.50939	0.000449135	0.00242379
ENSMUSG00000016257	Slmo2	203.723	150.287	150.287	237.908	225.025	248.449	270.706	212.341	-0.520981	0.209591	-2.48571	0.0129294	0.0358922
ENSMUSG00000016308	Ube2a	460.824	574.935	574.935	493.104	524.823	611.797	524.635	537.865	-0.00908253	0.168851	-0.0537902	0.957102	0.971176
ENSMUSG00000016319	Slc25a5	1293.51	1120.16	1120.16	2211.97	2026.64	2220.37	2265.54	1751.19	-0.879093	0.124206	-7.07768	1.4659e-12	1.45179e-10
ENSMUSG00000016344	Ppdpf	147.677	288.341	288.341	126.775	169.298	169.363	234.866	203.523	0.430926	0.321385	1.34084	0.179972	0.28197
ENSMUSG00000016382	Pls3	80.066	57.6683	57.6683	670.094	227.847	225.32	259.267	225.419	-2.16501	0.413034	-5.24173	1.59075e-07	3.06571e-06
ENSMUSG00000016409	Nkap	70.2801	82.1336	82.1336	106.194	104.4	84.3086	179.2	101.236	-0.568873	0.332118	-1.71286	0.0867377	0.160011
ENSMUSG00000016427	Ndufa1	491.961	1473.16	1473.16	416.545	387.974	463.324	384.326	727.208	1.37755	0.34124	4.0369	5.4162e-05	0.000424719
ENSMUSG00000016477	E2f3	26.6887	3.49505	3.49505	27.166	19.046	29.8437	23.6391	19.0534	-0.800759	0.607024	-1.31916	0.187117	0.29069
ENSMUSG00000016481	Cr1l	323.822	166.015	166.015	546.612	441.585	415.574	449.143	358.395	-1.02526	0.282883	-3.62433	0.00028971	0.00168318
ENSMUSG00000016487	Ppfibp1	329.16	197.47	197.47	221.444	305.442	292.469	255.455	256.987	-0.139906	0.261944	-0.534107	0.593267	0.694523
ENSMUSG00000016494	Cd34	28.4679	15.7277	15.7277	33.7517	15.519	12.6836	6.86296	18.3915	0.189936	0.568094	0.33434	0.738123	0.813327
ENSMUSG00000016495	Plgrkt	446.59	601.148	601.148	253.549	282.163	370.809	349.248	414.951	0.784037	0.219406	3.57346	0.000352293	0.00198218
ENSMUSG00000016496	Cd274	289.127	159.025	159.025	184.399	240.544	226.812	260.03	216.995	-0.153207	0.285183	-0.537223	0.591114	0.692783
ENSMUSG00000016503	Gtf3a	50.7084	34.9505	34.9505	74.089	62.7813	56.7031	70.9173	55.0143	-0.652462	0.321138	-2.03172	0.0421825	0.0909095
ENSMUSG00000016510	Mtif3	21.3509	20.9703	20.9703	32.1052	60.6651	41.7812	54.1411	35.9977	-1.0553	0.401913	-2.6257	0.00864718	0.0260463
ENSMUSG00000016520	Lnx2	136.112	36.698	36.698	91.3765	85.3543	78.3398	67.8671	76.0637	-0.162451	0.4602	-0.353002	0.724087	0.80299
ENSMUSG00000016528	Mapkapk2	1431.4	1144.63	1144.63	1559.16	1101.85	1284.77	1303.2	1281.38	-0.0780444	0.179772	-0.43413	0.664194	0.754805
ENSMUSG00000016529	Il10	155.684	136.307	136.307	98.7854	118.508	142.504	116.67	129.252	0.258354	0.23297	1.10896	0.267448	0.383068
ENSMUSG00000016534	Lamp2	2801.42	2086.54	2086.54	5617.59	4264.19	4490.74	4493.71	3691.53	-1.00202	0.180501	-5.55132	2.83523e-08	7.16918e-07
ENSMUSG00000016541	Atxn10	390.544	174.752	174.752	428.07	495.196	606.574	504.809	396.385	-0.978324	0.315356	-3.10229	0.00192031	0.00783956
ENSMUSG00000016552	Foxred2	56.0462	3.49505	3.49505	37.8677	28.9217	23.875	38.8901	27.513	-0.402705	0.646101	-0.623285	0.533097	0.64248
ENSMUSG00000016554	Eif3d	243.756	195.723	195.723	279.892	265.939	241.734	311.121	247.698	-0.359211	0.196954	-1.82384	0.068177	0.132851
ENSMUSG00000016559	H3f3b	6801.16	7418.24	7418.24	5866.2	6926.4	6759.61	7043.69	6890.51	0.116179	0.121679	0.9548	0.339679	0.457237
ENSMUSG00000016619	Nup50	206.392	209.703	209.703	262.604	193.987	239.496	220.377	220.323	-0.132473	0.193596	-0.684274	0.493802	0.606674
ENSMUSG00000016637	Ift27	72.949	71.6485	71.6485	66.6801	57.8434	78.3398	68.6296	69.677	0.0849272	0.268683	0.316088	0.751936	0.823514
ENSMUSG00000016664	Pacsin2	687.678	470.084	470.084	1545.99	1027.07	790.113	869.308	837.19	-0.920629	0.278994	-3.29981	0.000967503	0.00450911
ENSMUSG00000016756	Cmah	68.5009	162.52	162.52	204.156	71.9516	35.0664	48.8033	107.645	0.448575	0.526024	0.852764	0.39379	0.51077
ENSMUSG00000016757	Ttll12	35.5849	43.6881	43.6881	73.2658	57.138	69.3867	57.1913	54.2776	-0.627682	0.309613	-2.02731	0.0426304	0.0917125
ENSMUSG00000016831	Tox4	440.363	239.411	239.411	547.436	581.961	501.375	635.968	455.132	-0.845881	0.261851	-3.23039	0.00123623	0.00549799
ENSMUSG00000016833	Mrps18c	249.094	527.752	527.752	181.93	155.895	146.234	151.748	277.201	1.37999	0.294442	4.6868	2.77509e-06	3.5144e-05
ENSMUSG00000016921	Srsf6	448.369	532.995	532.995	629.757	590.426	802.051	708.41	606.429	-0.431559	0.178688	-2.41515	0.0157288	0.0415646
ENSMUSG00000016933	Plcg1	60.4943	10.4851	10.4851	55.9784	31.0379	34.3203	61.0041	37.6865	-0.559933	0.566611	-0.988214	0.323048	0.440733
ENSMUSG00000016940	Kctd2	82.7348	179.995	179.995	88.9068	84.6489	89.5312	93.0313	114.12	0.675725	0.322492	2.09532	0.0361426	0.0804707
ENSMUSG00000016946	Kctd5	124.547	69.901	69.901	163.819	127.679	76.8476	147.935	111.518	-0.496956	0.35989	-1.38086	0.167323	0.266363
ENSMUSG00000016984	Etaa1	16.0132	45.4356	45.4356	34.5749	42.3245	49.9883	48.8033	40.3679	-0.298927	0.434933	-0.687295	0.491897	0.605029
ENSMUSG00000017002	Slpi	83.6244	136.307	136.307	23.0499	62.7813	76.8476	67.8671	83.8263	0.934088	0.416123	2.24474	0.0247847	0.0595987
ENSMUSG00000017009	Sdc4	772.192	740.95	740.95	542.496	1073.63	946.047	1106.46	846.104	-0.277493	0.258262	-1.07446	0.282615	0.399531
ENSMUSG00000017057	Il13ra1	244.646	188.733	188.733	745.006	663.083	716.25	665.707	487.451	-1.70979	0.172935	-9.88693	4.74338e-23	2.98443e-20
ENSMUSG00000017119	Nbr1	572.027	284.846	284.846	707.962	450.756	468.547	462.106	461.584	-0.427298	0.308992	-1.38288	0.166702	0.265611
ENSMUSG00000017132	Cyth1	1724.09	1850.63	1850.63	775.465	1003.8	1222.1	960.052	1340.97	0.85274	0.18495	4.61065	4.01404e-06	4.82949e-05
ENSMUSG00000017144	Rnd3	126.326	66.4059	66.4059	121.012	234.901	142.504	183.012	134.367	-0.896939	0.353192	-2.53952	0.0111003	0.031848
ENSMUSG00000017146	Brca1	14.2339	10.4851	10.4851	31.282	36.6812	57.4492	33.5523	27.7384	-1.52079	0.454667	-3.34485	0.000823281	0.00394703
ENSMUSG00000017176	Nt5c3b	32.0264	1.74752	1.74752	47.7463	13.4027	33.5742	30.502	22.9638	-0.881546	0.661867	-1.33191	0.182891	0.285451
ENSMUSG00000017188	Coa3	249.984	428.143	428.143	169.582	190.46	182.047	227.24	267.943	0.900093	0.256656	3.507	0.000453191	0.00243952
ENSMUSG00000017210	Med24	197.496	69.901	69.901	205.803	205.979	155.187	181.487	155.108	-0.657613	0.384064	-1.71225	0.0868513	0.160138
ENSMUSG00000017221	Psmd3	547.117	578.43	578.43	706.315	535.404	478.246	540.649	566.37	0.00666079	0.185974	0.0358158	0.971429	0.980412
ENSMUSG00000017264	Exosc10	305.14	125.822	125.822	260.135	252.536	259.641	280.619	229.959	-0.461038	0.334189	-1.37957	0.167718	0.26678
ENSMUSG00000017286	Glod4	224.185	167.762	167.762	247.787	294.86	208.16	263.08	224.8	-0.421032	0.225696	-1.86548	0.0621137	0.123077
ENSMUSG00000017288	Vps53	189.489	139.802	139.802	262.604	220.793	182.047	260.793	199.333	-0.538307	0.242619	-2.21873	0.0265048	0.0626926
ENSMUSG00000017291	Taok1	377.2	620.371	620.371	316.936	399.261	393.937	324.847	436.132	0.565958	0.236412	2.39395	0.016668	0.0434832
ENSMUSG00000017299	Dnttip1	174.366	321.544	321.544	111.134	137.555	120.121	118.958	186.46	1.10435	0.276762	3.99024	6.60078e-05	0.00049966
ENSMUSG00000017307	Acot8	50.7084	38.4455	38.4455	31.282	39.5028	45.5117	42.7029	40.9427	0.105544	0.344002	0.306811	0.758987	0.829057
ENSMUSG00000017309	Cd300lg	29.3575	1.74752	1.74752	95.4925	22.573	32.8281	24.4016	29.7354	-1.25974	0.662939	-1.90023	0.0574028	0.115823
ENSMUSG00000017376	Nlk	42.7018	47.1832	47.1832	41.1606	25.3947	43.2734	57.1913	43.4412	0.116851	0.380737	0.306908	0.758913	0.829057
ENSMUSG00000017390	Aldoc	48.9292	1.74752	1.74752	13.9946	40.2082	34.3203	39.6527	25.8	-0.528022	0.673806	-0.783641	0.433251	0.548993
ENSMUSG00000017400	Stac2	24.9094	20.9703	20.9703	63.3873	16.2244	23.1289	23.6391	27.6042	-0.410902	0.522221	-0.786835	0.431378	0.547023
ENSMUSG00000017404	Rpl19	790.874	1216.28	1216.28	815.802	1099.73	1046.77	1120.95	1043.81	0.069523	0.217753	0.319275	0.749518	0.821819
ENSMUSG00000017405	Nek8	18.6821	27.9604	27.9604	28.8124	24.6893	5.96875	12.9634	21.0052	0.363365	0.547659	0.663486	0.507019	0.619355
ENSMUSG00000017417	Plxdc1	85.4037	1.74752	1.74752	183.576	86.7652	99.2305	113.62	81.7272	-1.28584	0.665868	-1.93108	0.0534733	0.10959
ENSMUSG00000017418	Arl5b	330.939	262.129	262.129	181.106	214.444	293.215	256.217	257.168	0.267097	0.238198	1.12133	0.262149	0.377647
ENSMUSG00000017421	Zfp207	800.66	753.183	753.183	909.649	781.592	954.254	770.939	817.637	-0.148371	0.148181	-1.00129	0.316689	0.43427
ENSMUSG00000017428	Psmd11	575.585	391.445	391.445	547.436	576.318	618.512	636.73	533.925	-0.378276	0.199681	-1.89441	0.0581711	0.117153
ENSMUSG00000017446	C1qtnf1	10.6755	0	0	74.089	19.7514	21.6367	16.7761	20.4184	-1.77484	0.683421	-2.59699	0.00940456	0.0278878
ENSMUSG00000017466	Timp2	3777.33	2228.09	2228.09	16716.1	5475.37	4944.36	5015.3	5769.24	-1.39972	0.412858	-3.39032	0.000698122	0.0034538
ENSMUSG00000017478	Zc3h18	223.295	270.866	270.866	165.465	160.128	211.891	185.3	212.544	0.480484	0.204711	2.34713	0.0189184	0.0480235
ENSMUSG00000017485	Top2b	523.987	508.53	508.53	630.58	536.815	564.793	500.996	539.176	-0.117581	0.149568	-0.786133	0.43179	0.547401
ENSMUSG00000017491	Rarb	8.0066	15.7277	15.7277	81.4979	19.7514	2.98437	20.5889	23.4692	-0.840851	0.655293	-1.28317	0.199434	0.305561
ENSMUSG00000017493	Igfbp4	700.132	546.975	546.975	593.535	533.288	694.613	508.622	589.163	0.0409193	0.19143	0.213757	0.830737	0.881504
ENSMUSG00000017499	Cdc6	10.6755	20.9703	20.9703	19.7571	43.7353	6.71484	18.3012	20.1606	-0.277136	0.582105	-0.476092	0.634009	0.729509
ENSMUSG00000017548	Suz12	149.456	176.5	176.5	130.067	141.787	185.777	159.373	159.923	0.109307	0.226643	0.482286	0.629602	0.725671
ENSMUSG00000017550	Atad5	44.4811	41.9406	41.9406	50.2159	55.7272	49.9883	64.8169	49.8729	-0.344773	0.307784	-1.12018	0.262637	0.377982
ENSMUSG00000017561	Crlf3	407.447	326.787	326.787	336.693	526.234	461.832	565.813	421.656	-0.403182	0.233223	-1.72874	0.083856	0.15596
ENSMUSG00000017607	Tns4	36.4745	10.4851	10.4851	18.1106	54.3164	45.5117	57.1913	33.225	-0.932621	0.544933	-1.71144	0.0869997	0.160329
ENSMUSG00000017615	Tnfaip1	267.776	288.341	288.341	372.092	253.947	246.957	248.592	280.864	0.00465233	0.222934	0.0208686	0.98335	0.988433
ENSMUSG00000017631	Abr	665.437	732.213	732.213	254.372	607.356	574.492	523.873	584.279	0.509381	0.293679	1.73448	0.0828323	0.154593
ENSMUSG00000017652	Cd40	169.918	234.168	234.168	449.473	240.544	208.16	234.103	252.934	-0.392776	0.31794	-1.23538	0.21669	0.326747
ENSMUSG00000017664	Slc35c2	290.906	302.322	302.322	247.787	265.233	215.621	274.518	271.244	0.245939	0.173837	1.41477	0.157136	0.254157
ENSMUSG00000017670	Elmo2	568.468	209.703	209.703	406.666	626.402	494.66	483.457	428.437	-0.560427	0.360616	-1.55408	0.120165	0.206405
ENSMUSG00000017677	Wsb1	2401.09	1282.68	1282.68	2444.11	1839	2068.17	1786.66	1872.06	-0.284774	0.262181	-1.08617	0.277402	0.393784
ENSMUSG00000017679	Ttpal	353.18	120.579	120.579	287.301	228.552	211.891	216.565	219.807	-0.221855	0.38429	-0.577313	0.563728	0.668845
ENSMUSG00000017686	Rhot1	319.374	99.6089	99.6089	391.025	287.806	314.852	374.413	269.527	-0.886288	0.396212	-2.23691	0.0252925	0.0605481
ENSMUSG00000017697	Ada	40.9226	0	0	30.4588	23.2785	23.1289	30.502	21.1844	-0.498552	0.698192	-0.714063	0.475189	0.589631
ENSMUSG00000017707	Serinc3	3725.74	1992.18	1992.18	14565.1	7995.09	6393.28	7877.92	6363.06	-1.73351	0.326626	-5.30733	1.11242e-07	2.2707e-06
ENSMUSG00000017713	Tha1	40.033	15.7277	15.7277	23.0499	26.8055	20.8906	22.8765	23.5873	0.0614723	0.475101	0.129388	0.897051	0.931034
ENSMUSG00000017715	Pgs1	431.467	753.183	753.183	381.147	426.772	381.254	394.239	503.035	0.681582	0.234509	2.90642	0.00365592	0.0130172
ENSMUSG00000017716	Birc5	47.15	122.327	122.327	78.2051	95.9355	87.293	95.3189	92.6508	0.0994441	0.365648	0.271967	0.785648	0.848131
ENSMUSG00000017721	Pigt	60.4943	3.49505	3.49505	72.4426	74.0678	83.5625	91.5061	55.5805	-1.2955	0.622882	-2.07984	0.0375399	0.0828916
ENSMUSG00000017737	Mmp9	662.768	1.74752	1.74752	5.76248	153.073	660.293	165.474	235.838	-0.0481987	0.657532	-0.0733024	0.941565	0.960621
ENSMUSG00000017747	Ghdc	60.4943	69.901	69.901	74.9122	55.0218	51.4805	80.0679	65.9684	0.0239251	0.308187	0.0776317	0.938121	0.958279
ENSMUSG00000017754	Pltp	5648.21	3944.16	3944.16	11293.6	9329.72	8009.32	9573.83	7391.86	-1.05907	0.198299	-5.34077	9.25507e-08	1.92218e-06
ENSMUSG00000017756	Slc12a7	321.153	213.198	213.198	575.425	571.38	423.035	407.965	389.336	-0.948401	0.246999	-3.8397	0.000123183	0.000832324
ENSMUSG00000017760	Ctsa	4279.08	3481.07	3481.07	5610.19	5308.19	5665.84	5507.15	4761.8	-0.553751	0.128737	-4.30141	1.69716e-05	0.000162224
ENSMUSG00000017764	Zswim1	41.8122	5.24257	5.24257	68.3265	40.2082	58.1953	43.4654	37.499	-1.18431	0.583262	-2.0305	0.0423059	0.0911156
ENSMUSG00000017765	Slc12a4	243.756	213.198	213.198	352.334	296.271	251.434	326.372	270.938	-0.442135	0.199949	-2.21124	0.0270191	0.0636028
ENSMUSG00000017774	Myo1c	878.057	473.579	473.579	1241.4	830.97	890.836	853.295	805.96	-0.618236	0.277775	-2.22567	0.026036	0.0618121
ENSMUSG00000017776	Crk	862.933	817.841	817.841	1173.08	847.195	940.824	876.171	905.126	-0.199856	0.168885	-1.18339	0.236656	0.348515
ENSMUSG00000017778	Cox7c	907.414	2074.31	2074.31	445.357	553.04	502.121	443.042	999.942	1.71201	0.290764	5.88797	3.90973e-09	1.30683e-07
ENSMUSG00000017781	Pitpna	2751.6	2287.51	2287.51	4623.15	3924.89	4076.66	3847.83	3399.88	-0.744733	0.141395	-5.26703	1.38652e-07	2.72114e-06
ENSMUSG00000017801	Mlx	134.333	171.257	171.257	160.526	127.679	185.031	154.798	157.84	0.0094773	0.234375	0.0404365	0.967745	0.977524
ENSMUSG00000017802	Fam134c	81.8452	57.6683	57.6683	99.6086	100.873	135.043	112.095	92.1145	-0.716023	0.282154	-2.53771	0.0111582	0.0319711
ENSMUSG00000017830	Dhx58	219.737	148.54	148.54	228.03	373.161	279.785	388.901	255.242	-0.837006	0.279024	-2.99976	0.00270192	0.0102155
ENSMUSG00000017831	Rab5a	540	227.178	227.178	878.367	900.806	881.883	744.25	628.523	-1.28016	0.314856	-4.06587	4.78542e-05	0.00038084
ENSMUSG00000017837	Nkiras2	288.237	389.698	389.698	412.429	270.877	255.164	240.966	321.01	0.258741	0.259096	0.998632	0.317973	0.435653
ENSMUSG00000017843	Ppp2r5c	367.414	403.678	403.678	586.95	601.713	601.352	649.694	516.354	-0.637285	0.136181	-4.6797	2.87301e-06	3.62527e-05
ENSMUSG00000017858	Ift52	132.554	139.802	139.802	179.46	264.528	192.492	192.163	177.257	-0.578966	0.231	-2.50634	0.0121987	0.0343723
ENSMUSG00000017861	Mybl2	17.7924	0	0	0.823211	34.565	21.6367	16.0136	12.9758	-0.68563	0.69722	-0.983377	0.325422	0.442895
ENSMUSG00000017929	B4galt5	375.42	891.237	891.237	283.185	365.401	367.078	378.225	507.398	0.988934	0.308538	3.20523	0.00134955	0.00590137
ENSMUSG00000017999	Ddx27	150.346	263.876	263.876	222.267	165.065	177.57	170.811	201.973	0.277229	0.271228	1.02213	0.306721	0.423751
ENSMUSG00000018001	Cyth3	425.239	440.376	440.376	388.556	220.793	238.004	207.414	337.251	0.697547	0.261871	2.66371	0.00772846	0.0237473
ENSMUSG00000018008	Cyth4	2077.27	1906.55	1906.55	1497.42	1400.23	1207.93	1440.46	1633.77	0.498254	0.133513	3.73187	0.000190063	0.00119442
ENSMUSG00000018012	Rac3	40.033	146.792	146.792	79.8515	29.6271	26.1133	17.5387	69.5354	1.26097	0.536649	2.3497	0.0187884	0.0478135
ENSMUSG00000018040	Rrp7a	164.58	178.247	178.247	158.057	146.019	152.949	133.446	158.792	0.226597	0.191706	1.182	0.237204	0.349132
ENSMUSG00000018042	Cyb5r3	838.024	980.361	980.361	1713.1	1043.3	937.094	1085.11	1082.48	-0.346547	0.240532	-1.44075	0.149654	0.244868
ENSMUSG00000018068	Ints2	102.307	80.3861	80.3861	69.1498	100.168	106.691	97.6066	90.9563	-0.0780105	0.280259	-0.278351	0.780743	0.844541
ENSMUSG00000018076	Med13l	193.048	417.658	417.658	195.101	323.077	265.609	290.532	300.383	0.327083	0.316826	1.03237	0.301897	0.419145
ENSMUSG00000018102	Hist1h2bc	232.191	258.634	258.634	194.278	156.601	146.98	150.223	199.649	0.609347	0.199461	3.05497	0.00225086	0.00885118
ENSMUSG00000018143	Mafk	488.402	281.351	281.351	716.194	597.48	569.269	504.046	491.156	-0.733671	0.257802	-2.84587	0.00442898	0.0151928
ENSMUSG00000018160	Med1	231.302	188.733	188.733	185.223	224.32	239.496	248.592	215.2	-0.135096	0.207813	-0.650087	0.515636	0.626715
ENSMUSG00000018167	Stard3	370.083	207.955	207.955	298.826	356.231	294.707	383.563	302.76	-0.324714	0.268658	-1.20865	0.226796	0.338234
ENSMUSG00000018169	Mfng	75.6179	8.73762	8.73762	74.089	25.3947	25.3672	35.0774	36.1459	-0.244065	0.621185	-0.392903	0.694391	0.779432
ENSMUSG00000018171	Vmp1	1442.08	1808.69	1808.69	616.585	840.141	825.926	902.098	1177.74	1.06132	0.189146	5.61113	2.01013e-08	5.36168e-07
ENSMUSG00000018189	Uchl5	217.068	279.604	279.604	321.052	375.982	329.027	289.769	298.872	-0.347442	0.195107	-1.78078	0.0749482	0.142998
ENSMUSG00000018196	Glrx2	145.008	272.614	272.614	149.001	121.33	126.836	125.058	173.209	0.774056	0.282503	2.74	0.00614399	0.0197702
ENSMUSG00000018199	Trove2	69.3905	12.2327	12.2327	128.421	78.3003	90.2773	89.2185	68.5818	-1.31135	0.525413	-2.49585	0.0125657	0.0351749
ENSMUSG00000018209	Stk4	487.513	300.574	300.574	433.009	480.383	504.359	523.873	432.898	-0.400054	0.229723	-1.74147	0.0816021	0.152821
ENSMUSG00000018217	Pmp22	1132.49	704.252	704.252	4577.88	1583.64	1392.96	1793.52	1698.43	-1.33713	0.39166	-3.41402	0.000640116	0.003225
ENSMUSG00000018239	Zcchc10	28.4679	62.9109	62.9109	13.9946	56.4326	35.0664	28.9769	41.2515	0.509687	0.49531	1.02903	0.303467	0.420755
ENSMUSG00000018286	Psmb6	969.688	1394.52	1394.52	940.931	822.505	1143.02	991.317	1093.79	0.352887	0.20187	1.74809	0.0804487	0.15112
ENSMUSG00000018287	Spag7	214.399	221.936	221.936	299.649	280.752	259.641	274.518	253.261	-0.34146	0.16313	-2.09318	0.0363333	0.0808279
ENSMUSG00000018293	Pfn1	4900.93	9406.92	9406.92	5124.49	6701.37	6105.28	6737.9	6911.97	0.34589	0.250721	1.37958	0.167715	0.26678
ENSMUSG00000018322	Tomm34	222.405	407.173	407.173	270.013	191.871	223.082	250.879	281.8	0.534714	0.272886	1.95948	0.0500565	0.104164
ENSMUSG00000018326	Ywhab	1228.57	1004.83	1004.83	1385.46	1343.8	1513.08	1480.11	1280.1	-0.399125	0.141141	-2.82785	0.00468614	0.0158868
ENSMUSG00000018339	Gpx3	218.847	192.228	192.228	89.73	131.911	144.742	163.949	161.948	0.580918	0.263649	2.20338	0.0275683	0.0645654
ENSMUSG00000018340	Anxa6	642.307	431.638	431.638	1414.28	898.689	899.043	838.044	793.662	-0.972812	0.25878	-3.75923	0.000170437	0.00109226
ENSMUSG00000018347	Zkscan6	97.8584	12.2327	12.2327	73.2658	38.7974	38.7969	47.2782	45.7803	-0.194008	0.589952	-0.328853	0.742267	0.816547
ENSMUSG00000018362	Kpna2	182.372	132.812	132.812	346.572	405.609	339.473	338.573	268.318	-1.21638	0.208175	-5.84306	5.12501e-09	1.65112e-07
ENSMUSG00000018363	Smurf2	108.534	160.772	160.772	158.88	148.136	142.504	134.209	144.83	-0.0384332	0.238187	-0.161357	0.871812	0.911882
ENSMUSG00000018372	Cep95	68.5009	45.4356	45.4356	50.2159	45.1461	49.9883	50.3284	50.7215	0.135065	0.318849	0.423602	0.671856	0.761348
ENSMUSG00000018377	Vezf1	157.463	99.6089	99.6089	181.93	200.336	206.668	202.076	163.956	-0.691352	0.247393	-2.79455	0.00519726	0.0173285
ENSMUSG00000018379	Srsf1	417.233	304.069	304.069	271.66	376.688	481.23	396.527	364.497	-0.149152	0.251436	-0.593201	0.553047	0.659684
ENSMUSG00000018381	Abi3	118.32	117.084	117.084	39.5141	137.555	101.469	109.807	105.833	0.250455	0.392258	0.638495	0.523151	0.633706
ENSMUSG00000018395	Kif3a	188.6	155.53	155.53	311.997	244.071	242.48	136.497	204.958	-0.460877	0.303725	-1.51742	0.129162	0.218698
ENSMUSG00000018398	2008-09-01	314.036	146.792	146.792	504.629	308.969	326.789	354.586	300.37	-0.82127	0.329743	-2.49063	0.0127515	0.0355275
ENSMUSG00000018401	Mtmr4	53.3773	13.9802	13.9802	84.7908	79.0057	101.469	74.73	60.1904	-1.38919	0.467386	-2.97225	0.00295624	0.010983
ENSMUSG00000018405	Mrm1	48.9292	200.965	200.965	52.6855	52.2002	62.6719	47.2782	95.0994	1.31011	0.441846	2.96509	0.00302597	0.0111954
ENSMUSG00000018412	Kansl1	364.745	365.233	365.233	347.395	277.931	392.445	305.02	345.429	0.140371	0.187086	0.7503	0.453074	0.568589
ENSMUSG00000018415	Gid4	112.092	12.2327	12.2327	131.714	65.6029	43.2734	70.1547	63.9004	-0.56296	0.602325	-0.934645	0.349971	0.467678
ENSMUSG00000018417	Myo1b	43.5915	110.094	110.094	2.46963	56.4326	67.8945	42.7029	61.897	0.782643	0.609966	1.28309	0.19946	0.305561
ENSMUSG00000018425	Dhx40	169.028	171.257	171.257	220.621	243.366	169.363	205.889	192.969	-0.292878	0.211228	-1.38655	0.165579	0.264254
ENSMUSG00000018427	Ypel2	13.3443	36.698	36.698	28.8124	17.6352	26.8594	21.3514	25.9141	0.22373	0.475904	0.470115	0.638273	0.7329
ENSMUSG00000018428	Akap1	10.6755	10.4851	10.4851	79.0283	28.9217	30.5898	50.3284	31.502	-1.82268	0.500595	-3.64103	0.000271548	0.00159602
ENSMUSG00000018433	Nol11	149.456	101.356	101.356	205.803	187.638	155.187	138.022	148.403	-0.513055	0.270946	-1.89357	0.0582819	0.11731
ENSMUSG00000018442	Derl2	443.032	496.297	496.297	349.042	402.788	424.527	420.928	433.273	0.254308	0.156261	1.62745	0.103641	0.184235
ENSMUSG00000018446	C1qbp	201.055	202.713	202.713	270.837	275.814	337.98	295.87	255.283	-0.537353	0.178696	-3.00707	0.00263777	0.0100283
ENSMUSG00000018449	Rpain	241.088	225.431	225.431	192.631	134.733	136.535	154.035	187.126	0.567386	0.216857	2.61641	0.00888608	0.0266159
ENSMUSG00000018459	Slc13a3	159.242	197.47	197.47	93.0229	407.726	180.555	481.932	245.345	-0.577509	0.454512	-1.27061	0.203866	0.310949
ENSMUSG00000018474	Chd3	68.5009	164.267	164.267	46.0998	79.0057	85.0547	61.7667	95.566	0.871159	0.384672	2.26468	0.0235324	0.0573354
ENSMUSG00000018476	Kdm6b	289.127	844.054	844.054	214.035	293.45	312.613	227.24	432.082	1.2367	0.3558	3.47583	0.000509271	0.00269128
ENSMUSG00000018481	Appbp2	274.893	235.916	235.916	338.34	349.177	397.668	284.432	302.334	-0.446048	0.194935	-2.28819	0.0221264	0.0545937
ENSMUSG00000018500	Adora2b	572.916	449.114	449.114	81.4979	275.814	360.363	308.071	356.699	0.85085	0.402877	2.11193	0.0346921	0.0778407
ENSMUSG00000018501	Ncor1	990.149	999.584	999.584	790.283	807.692	921.426	787.715	899.49	0.266741	0.127245	2.09628	0.0360572	0.0803263
ENSMUSG00000018507	Trpv2	444.811	291.837	291.837	514.507	641.216	496.152	536.074	459.49	-0.648831	0.222197	-2.92006	0.0034996	0.0125821
ENSMUSG00000018541	Cwc25	135.223	398.436	398.436	97.9622	210.212	216.367	184.537	234.453	0.73167	0.401701	1.82143	0.0685416	0.133416
ENSMUSG00000018548	Trim37	48.9292	61.1633	61.1633	85.614	70.5408	79.0859	73.9675	68.6377	-0.433298	0.2748	-1.57677	0.114848	0.199482
ENSMUSG00000018559	Ctdnep1	81.8452	69.901	69.901	60.0944	105.811	84.3086	89.981	80.2632	-0.188079	0.300608	-0.625661	0.531537	0.64125
ENSMUSG00000018565	Elp5	180.593	244.653	244.653	206.626	178.468	195.477	208.176	208.378	0.166261	0.205264	0.809985	0.417949	0.534095
ENSMUSG00000018567	Gabarap	2079.05	2574.1	2574.1	2114.83	2103.53	2683.7	2596.49	2389.4	0.0194924	0.167749	0.1162	0.907494	0.937469
ENSMUSG00000018572	Phf23	308.699	470.084	470.084	611.646	430.299	507.344	475.832	467.712	-0.279835	0.227853	-1.22814	0.219396	0.329911
ENSMUSG00000018574	Acadvl	214.399	153.782	153.782	310.351	253.241	225.32	231.053	220.275	-0.524268	0.234585	-2.23487	0.0254258	0.0607448
ENSMUSG00000018583	G3bp1	865.602	906.965	906.965	596.828	788.646	807.273	876.171	821.207	0.214935	0.176536	1.21751	0.223411	0.334487
ENSMUSG00000018585	Atox1	1482.11	3619.12	3619.12	670.917	1185.08	1195.99	1326.84	1871.31	1.32164	0.336765	3.92452	8.69045e-05	0.000626368
ENSMUSG00000018593	Sparc	673.444	747.94	747.94	3681.4	877.527	568.523	907.436	1172.03	-0.914326	0.481962	-1.89709	0.0578158	0.116547
ENSMUSG00000018599	Mief2	63.1631	5.24257	5.24257	15.641	25.3947	16.4141	24.4016	22.2142	0.209891	0.64245	0.326705	0.743891	0.817997
ENSMUSG00000018651	Tada2a	30.2471	52.4257	52.4257	32.1052	33.1542	31.3359	41.1778	38.9817	0.335517	0.369288	0.908552	0.363587	0.481586
ENSMUSG00000018654	Ikzf1	91.631	256.886	256.886	134.183	190.46	265.609	180.725	196.626	0.0533335	0.383201	0.139179	0.889309	0.924704
ENSMUSG00000018659	Pnpo	115.651	33.203	33.203	79.0283	114.981	64.1641	103.707	77.7054	-0.482054	0.4636	-1.0398	0.298431	0.415248
ENSMUSG00000018661	Cog1	133.443	12.2327	12.2327	149.001	120.625	132.059	127.346	98.1342	-1.01017	0.583449	-1.73138	0.0833847	0.155326
ENSMUSG00000018666	Cbx1	88.9622	164.267	164.267	75.7354	76.184	128.328	94.5564	113.186	0.525808	0.334951	1.5698	0.116461	0.201759
ENSMUSG00000018669	Cdk5rap3	193.048	204.46	204.46	178.637	189.755	161.902	137.259	181.36	0.257647	0.206491	1.24774	0.212126	0.321211
ENSMUSG00000018672	Copz2	35.5849	82.1336	82.1336	59.2712	51.4948	29.0977	39.6527	54.1955	0.498963	0.417785	1.19431	0.232359	0.343798
ENSMUSG00000018677	Slc25a39	631.631	613.381	613.381	529.325	649.681	678.199	698.497	630.585	-0.0437731	0.158833	-0.275592	0.782861	0.84632
ENSMUSG00000018678	Sp2	56.9358	26.2129	26.2129	60.9176	83.2381	91.7695	102.944	64.033	-1.0784	0.390526	-2.7614	0.00575535	0.018814
ENSMUSG00000018697	Aatf	161.911	99.6089	99.6089	83.1443	164.36	155.934	165.474	132.863	-0.216409	0.336779	-0.642583	0.520495	0.630988
ENSMUSG00000018707	Dync1h1	419.901	422.901	422.901	498.866	524.118	559.57	499.471	478.247	-0.300656	0.135149	-2.22462	0.0261068	0.0619017
ENSMUSG00000018733	Pex12	24.0198	97.8614	97.8614	48.5695	31.7433	13.4297	38.1276	50.2304	0.948536	0.525127	1.8063	0.070872	0.136683
ENSMUSG00000018736	Ndel1	1654.7	1616.46	1616.46	1039.72	1424.92	1548.89	1559.42	1494.37	0.221782	0.182863	1.21283	0.225195	0.336361
ENSMUSG00000018750	Zbtb4	32.0264	113.589	113.589	62.5641	41.6191	29.0977	42.7029	62.1697	0.840679	0.464271	1.81075	0.0701798	0.13576
ENSMUSG00000018752	Tnfsfm13	24.0198	27.9604	27.9604	29.6356	41.6191	41.7812	45.7531	34.1042	-0.542432	0.37194	-1.45839	0.144734	0.238422
ENSMUSG00000018761	Mpdu1	285.569	267.371	267.371	184.399	254.652	261.879	238.679	251.417	0.215596	0.200205	1.07688	0.281535	0.398531
ENSMUSG00000018765	Fxr2	135.223	127.569	127.569	140.769	121.33	193.984	173.862	145.758	-0.263909	0.25204	-1.04709	0.295058	0.41217
ENSMUSG00000018770	Atp5g3	994.597	1394.52	1394.52	1010.9	932.549	1101.23	976.828	1115.02	0.319247	0.176596	1.80778	0.0706404	0.136409
ENSMUSG00000018774	Cd68	7293.12	4816.18	4816.18	8791.9	8081.15	8941.93	8464.32	7314.97	-0.59133	0.187967	-3.14593	0.00165561	0.00691733
ENSMUSG00000018796	Acsl1	140.56	122.327	122.327	191.808	267.35	271.578	264.605	197.222	-0.923441	0.224932	-4.10542	4.03574e-05	0.000331539
ENSMUSG00000018809	Smyd4	22.2405	13.9802	13.9802	39.5141	17.6352	28.3516	23.6391	22.763	-0.582827	0.475336	-1.22614	0.220147	0.330762
ENSMUSG00000018819	Lsp1	849.589	1106.18	1106.18	1884.33	1157.57	846.816	1154.5	1157.88	-0.29321	0.276812	-1.05924	0.289492	0.406512
ENSMUSG00000018820	Zfyve27	267.776	199.218	199.218	83.1443	135.438	101.469	110.57	156.69	1.01232	0.259668	3.89851	9.67853e-05	0.000686938
ENSMUSG00000018821	Avpi1	211.73	602.896	602.896	232.146	160.128	141.012	165.474	302.326	1.32805	0.364004	3.64845	0.000263827	0.00156323
ENSMUSG00000018841	Rad51d	34.6953	24.4653	24.4653	41.1606	28.9217	35.0664	22.8765	30.2359	-0.160407	0.407805	-0.393343	0.694066	0.779149
ENSMUSG00000018846	Pank3	190.379	227.178	227.178	241.201	183.406	268.594	188.35	218.041	-0.039538	0.229164	-0.172531	0.86302	0.904326
ENSMUSG00000018848	Rars	383.427	482.317	482.317	355.627	342.123	417.812	402.627	409.464	0.234607	0.177228	1.32376	0.185583	0.288849
ENSMUSG00000018849	Wwc1	22.2405	50.6782	50.6782	10.7017	12.6973	15.668	9.15061	24.5449	1.5217	0.471789	3.22539	0.00125801	0.0055694
ENSMUSG00000018858	Ict1	88.9622	78.6386	78.6386	106.194	112.865	138.027	131.921	105.035	-0.549657	0.243524	-2.2571	0.0240021	0.0582015
ENSMUSG00000018861	Fdxr	39.1434	47.1832	47.1832	37.8677	31.7433	24.6211	21.3514	35.5848	0.568022	0.375245	1.51373	0.130093	0.219684
ENSMUSG00000018882	Mrpl45	104.975	99.6089	99.6089	97.9622	127.679	131.312	121.246	111.77	-0.228995	0.234213	-0.977722	0.328212	0.445954
ENSMUSG00000018899	Irf1	330.939	253.391	253.391	1001.02	452.872	406.621	438.467	448.101	-0.972737	0.340749	-2.8547	0.00430776	0.0148297
ENSMUSG00000018900	Slc22a5	36.4745	34.9505	34.9505	29.6356	24.6893	40.2891	66.342	38.1902	-0.160827	0.436087	-0.368795	0.71228	0.793829
ENSMUSG00000018906	P4ha2	24.9094	0	0	41.9838	46.5569	49.2422	47.2782	29.9958	-1.45901	0.677625	-2.15313	0.0313087	0.0714329
ENSMUSG00000018909	Arrb1	173.476	267.371	267.371	182.753	164.36	193.984	204.364	207.669	0.3219	0.235147	1.36893	0.171021	0.270918
ENSMUSG00000018920	Cxcl16	2454.47	2193.14	2193.14	1313.85	3024.08	2277.08	3307.18	2394.71	-0.115797	0.292892	-0.395357	0.692579	0.777806
ENSMUSG00000018923	Med11	149.456	372.223	372.223	102.078	140.376	170.109	157.848	209.188	0.985512	0.351223	2.80595	0.00501692	0.0168533
ENSMUSG00000018927	Ccl6	3328.08	1948.49	1948.49	6478.67	2485.15	3692.42	2473.72	3193.57	-0.605986	0.353878	-1.71242	0.08682	0.160136
ENSMUSG00000018930	Ccl4	678.781	2069.07	2069.07	403.374	536.815	467.801	634.443	979.907	1.53855	0.354181	4.34398	1.39925e-05	0.000138578
ENSMUSG00000018931	Natd1	57.8254	85.6287	85.6287	119.366	90.2922	30.5898	58.7164	75.4353	0.0224737	0.443677	0.0506533	0.959602	0.973251
ENSMUSG00000018932	Map2k3	1080.89	1305.4	1305.4	924.466	919.146	1136.3	899.048	1081.52	0.33717	0.160538	2.10025	0.0357069	0.0796664
ENSMUSG00000018965	Ywhah	1396.71	999.584	999.584	1286.68	2027.34	1822.71	1950.61	1497.6	-0.627816	0.222834	-2.81742	0.00484112	0.0163436
ENSMUSG00000018974	Sart3	193.048	22.7178	22.7178	162.996	167.887	147.727	152.51	124.229	-0.780287	0.555102	-1.40566	0.159824	0.257801
ENSMUSG00000018983	E2f2	41.8122	43.6881	43.6881	52.6855	76.184	70.1328	89.2185	59.6299	-0.70456	0.322118	-2.18727	0.0287226	0.0667139
ENSMUSG00000018995	Nars2	82.7348	41.9406	41.9406	63.3873	47.2623	53.7187	40.4152	53.0571	0.132358	0.379476	0.348792	0.727246	0.805684
ENSMUSG00000018999	Slc35b4	209.061	129.317	129.317	377.031	309.674	251.434	245.541	235.911	-0.874289	0.277791	-3.14729	0.00164791	0.00689593
ENSMUSG00000019039	Dalrd3	177.035	17.4752	17.4752	105.371	80.4165	61.1797	89.981	78.4191	-0.181166	0.591012	-0.306536	0.759197	0.829117
ENSMUSG00000019054	Fis1	498.188	973.371	973.371	469.23	378.099	411.844	438.467	591.796	0.904185	0.261854	3.45301	0.000554366	0.0028812
ENSMUSG00000019055	Plod1	474.168	543.48	543.48	1114.63	856.365	858.008	946.326	762.351	-0.849185	0.166862	-5.08916	3.59659e-07	6.18474e-06
ENSMUSG00000019066	Rab3d	151.236	94.3663	94.3663	252.726	122.741	116.391	154.035	140.837	-0.465476	0.354452	-1.31323	0.189106	0.293057
ENSMUSG00000019080	Mfsd3	51.5981	45.4356	45.4356	32.1052	27.5109	34.3203	22.114	36.9314	0.669878	0.351533	1.90559	0.0567036	0.114803
ENSMUSG00000019082	Slc25a22	141.45	87.3762	87.3762	105.371	186.228	147.727	206.651	137.454	-0.568171	0.327956	-1.73246	0.0831914	0.155074
ENSMUSG00000019087	Atp6ap1	1949.16	913.955	913.955	3120.79	2854.79	2873.95	2999.88	2232.35	-1.18108	0.278143	-4.2463	2.17333e-05	0.000198853
ENSMUSG00000019088	Dnase1l1	784.646	929.683	929.683	852.024	882.465	907.996	940.988	889.641	-0.0268216	0.133955	-0.200229	0.841302	0.88888
ENSMUSG00000019122	Ccl9	3788.01	2965.55	2965.55	5707.32	3530.57	3874.46	4152.85	3854.9	-0.403686	0.211106	-1.91225	0.0558448	0.113386
ENSMUSG00000019132	BC005537	565.799	1401.51	1401.51	487.341	556.567	627.465	537.599	796.828	0.969957	0.307303	3.15635	0.00159755	0.00673262
ENSMUSG00000019139	Isyna1	176.145	228.926	228.926	145.708	134.733	160.41	153.273	175.446	0.48873	0.206926	2.36186	0.0181837	0.046574
ENSMUSG00000019143	Hars2	84.5141	78.6386	78.6386	88.9068	83.2381	102.961	64.8169	83.102	-0.0698342	0.277445	-0.251704	0.80127	0.859876
ENSMUSG00000019158	Tmem160	265.107	919.198	919.198	297.179	207.39	210.398	212.752	433.032	1.46529	0.381896	3.83689	0.000124602	0.000840315
ENSMUSG00000019173	Rab5c	99.6376	234.168	234.168	179.46	183.406	232.035	189.113	193.141	-0.0573834	0.323732	-0.177256	0.859307	0.901977
ENSMUSG00000019179	Mdh2	707.249	456.104	456.104	657.746	629.929	724.457	635.205	609.542	-0.281202	0.210323	-1.337	0.181223	0.283593
ENSMUSG00000019188	H13	705.47	349.505	349.505	615.762	548.807	572.254	584.877	532.311	-0.29127	0.276241	-1.05441	0.291697	0.408828
ENSMUSG00000019189	Rnf145	264.218	55.9208	55.9208	598.475	346.355	282.77	401.865	286.503	-1.45484	0.480107	-3.03023	0.00244364	0.00944604
ENSMUSG00000019194	Scn1b	50.7084	15.7277	15.7277	99.6086	40.9136	44.0195	63.2918	47.1425	-0.96134	0.504918	-1.90395	0.0569162	0.115102
ENSMUSG00000019210	Atp6v1e1	1380.69	1819.17	1819.17	1146.73	1275.38	1475.77	1229.23	1449.45	0.376613	0.172169	2.18746	0.0287089	0.0667139
ENSMUSG00000019214	Chtf18	8.89622	0	0	23.8731	28.9217	14.9219	6.10041	11.8162	-1.38916	0.690242	-2.01257	0.0441599	0.0943097
ENSMUSG00000019254	Ppp1r12c	1268.6	1481.9	1481.9	848.731	893.046	913.219	932.6	1117.14	0.645773	0.127303	5.07273	3.92155e-07	6.59511e-06
ENSMUSG00000019256	Ahr	184.152	426.396	426.396	97.9622	155.19	175.332	131.921	228.193	1.21365	0.343804	3.53007	0.000415443	0.00226829
ENSMUSG00000019261	Map1s	451.928	193.975	193.975	434.656	409.136	340.219	393.476	345.338	-0.457885	0.321705	-1.4233	0.154648	0.25108
ENSMUSG00000019295	Tmem129	57.8254	0	0	145.708	67.0137	78.3398	78.5428	61.0615	-0.790798	0.681491	-1.16039	0.245889	0.358803
ENSMUSG00000019297	Nop9	204.613	19.2228	19.2228	171.228	198.925	143.996	176.149	133.337	-0.83867	0.577876	-1.4513	0.146697	0.240876
ENSMUSG00000019302	Atp6v0a1	524.877	447.366	447.366	920.35	772.421	887.105	737.387	676.696	-0.79407	0.162974	-4.87238	1.10261e-06	1.6002e-05
ENSMUSG00000019338	Zfp687	93.4103	52.4257	52.4257	83.9676	69.13	72.3711	57.9539	68.812	-0.0715495	0.33607	-0.212901	0.831404	0.881862
ENSMUSG00000019362	D8Ertd738e	440.363	924.44	924.44	344.102	406.315	397.668	404.915	548.892	0.931995	0.276108	3.37547	0.000736906	0.00360972
ENSMUSG00000019370	Calm3	431.467	795.123	795.123	331.754	433.826	447.656	510.909	535.123	0.616389	0.269644	2.28593	0.0222581	0.0548428
ENSMUSG00000019373	Cops3	140.56	92.6188	92.6188	162.173	118.508	171.602	168.524	135.229	-0.478612	0.276074	-1.73364	0.0829826	0.154766
ENSMUSG00000019428	Fkbp8	966.129	1382.29	1382.29	618.232	586.194	613.289	621.479	881.415	1.00862	0.177355	5.68705	1.29252e-08	3.69647e-07
ENSMUSG00000019432	Ddx39b	283.789	307.564	307.564	348.218	377.393	467.055	393.476	355.009	-0.400462	0.178042	-2.24926	0.0244962	0.0590782
ENSMUSG00000019433	Gipc1	240.198	78.6386	78.6386	305.411	139.671	200.699	188.35	175.944	-0.574153	0.427315	-1.34363	0.179069	0.280871
ENSMUSG00000019461	Plscr3	114.761	71.6485	71.6485	142.416	149.546	114.152	111.332	110.786	-0.543087	0.289769	-1.87421	0.0609015	0.121398
ENSMUSG00000019470	Xab2	298.913	139.802	139.802	200.04	177.057	188.762	167.761	187.448	0.0807302	0.31484	0.256417	0.797629	0.857001
ENSMUSG00000019471	Cdc37	477.727	386.203	386.203	449.473	405.609	365.586	397.289	409.727	0.0482453	0.17171	0.28097	0.778734	0.843135
ENSMUSG00000019487	Trip10	130.774	45.4356	45.4356	167.935	177.057	203.684	160.136	132.922	-1.1315	0.387592	-2.91931	0.00350812	0.0126
ENSMUSG00000019494	Cops6	411.005	386.203	386.203	421.484	431.71	467.801	509.384	430.541	-0.209481	0.152551	-1.37318	0.169696	0.269218
ENSMUSG00000019505	Ubb	1882.44	1661.9	1661.9	2239.96	2507.72	2470.32	2598.77	2146.14	-0.494573	0.123593	-4.00161	6.29122e-05	0.000479965
ENSMUSG00000019518	Ap4m1	48.9292	13.9802	13.9802	23.0499	48.6731	28.3516	27.4518	29.2023	-0.228339	0.52721	-0.433109	0.664936	0.755406
ENSMUSG00000019528	Gyg	237.529	54.1732	54.1732	395.965	211.622	249.195	226.478	204.162	-1.05652	0.472598	-2.23555	0.0253809	0.0607054
ENSMUSG00000019539	Rcn3	43.5915	52.4257	52.4257	116.073	54.3164	74.6094	57.9539	64.4851	-0.572283	0.37089	-1.543	0.122831	0.210209
ENSMUSG00000019558	Slc6a8	184.152	377.465	377.465	136.653	152.368	179.062	164.711	224.554	0.931805	0.294921	3.15951	0.00158037	0.00667245
ENSMUSG00000019564	Arid3a	194.827	225.431	225.431	203.333	191.165	230.543	195.213	209.42	0.0625636	0.185934	0.336484	0.736506	0.811977
ENSMUSG00000019578	Ubxn6	271.335	361.738	361.738	235.438	168.592	158.172	158.611	245.089	0.849954	0.238498	3.56378	0.000365547	0.00204385
ENSMUSG00000019579	Mydgf	313.147	321.544	321.544	256.842	289.923	334.996	269.943	301.134	0.143046	0.174842	0.818142	0.413276	0.529579
ENSMUSG00000019647	Sema6a	8.0066	47.1832	47.1832	56.8016	15.519	8.20703	8.38806	27.3269	0.427441	0.639666	0.668226	0.50399	0.616218
ENSMUSG00000019659	Ccdc12	388.765	1169.09	1169.09	390.202	400.672	340.219	426.266	612.044	1.14215	0.344357	3.31677	0.000910659	0.00428338
ENSMUSG00000019689	Fmc1	52.4877	166.015	166.015	51.0391	29.6271	29.0977	36.6025	75.8405	1.60495	0.435976	3.68127	0.000232072	0.00140956
ENSMUSG00000019699	Akt3	64.9424	82.1336	82.1336	53.5087	31.7433	41.0352	46.5156	57.4304	0.771063	0.320459	2.40612	0.016123	0.0423524
ENSMUSG00000019710	Mrpl24	144.119	146.792	146.792	136.653	140.376	152.203	154.035	145.853	-0.00043066	0.193097	-0.00223028	0.99822	0.999061
ENSMUSG00000019715	Gle1	86.2933	244.653	244.653	188.515	61.3705	115.645	121.246	151.768	0.581561	0.433982	1.34006	0.180227	0.282323
ENSMUSG00000019726	Lyst	286.458	526.005	526.005	112.78	143.903	155.934	137.259	269.763	1.62531	0.274026	5.93123	3.00669e-09	1.04754e-07
ENSMUSG00000019731	Slc35e1	196.606	8.73762	8.73762	312.82	225.73	226.066	220.377	171.297	-1.26741	0.627474	-2.01986	0.0433979	0.0930229
ENSMUSG00000019738	Polr2i	127.216	221.936	221.936	88.9068	76.184	87.293	105.995	132.781	1.03005	0.287799	3.57907	0.000344824	0.0019463
ENSMUSG00000019763	Rmnd1	209.061	155.53	155.53	115.25	137.555	102.215	131.159	143.757	0.50596	0.239815	2.10979	0.0348764	0.0782215
ENSMUSG00000019768	Esr1	12.4547	1.74752	1.74752	23.8731	20.4568	32.082	22.8765	16.4626	-1.56325	0.599543	-2.6074	0.00912314	0.0271814
ENSMUSG00000019774	Mtrf1l	13.3443	36.698	36.698	23.0499	39.5028	39.543	16.0136	29.2642	-0.0495462	0.505716	-0.0979724	0.921954	0.946465
ENSMUSG00000019777	Hdac2	218.847	213.198	213.198	302.119	333.658	303.66	293.582	268.323	-0.511186	0.160578	-3.18342	0.00145546	0.00626715
ENSMUSG00000019782	Rwdd1	171.697	214.945	214.945	195.101	196.809	192.492	208.939	199.276	0.00589056	0.187788	0.0313682	0.974976	0.983141
ENSMUSG00000019790	Stxbp5	217.957	160.772	160.772	420.661	244.071	211.145	208.939	232.045	-0.555863	0.312499	-1.77877	0.0752777	0.143473
ENSMUSG00000019791	Hint3	52.4877	69.901	69.901	39.5141	41.6191	42.5273	31.2646	49.6021	0.674306	0.317365	2.1247	0.0336115	0.0758592
ENSMUSG00000019792	Trmt11	65.832	54.1732	54.1732	19.7571	44.4407	66.4023	80.8304	55.087	0.121986	0.455969	0.267531	0.78906	0.850486
ENSMUSG00000019794	Katna1	149.456	321.544	321.544	198.394	216.56	223.828	226.478	236.829	0.26654	0.294609	0.904726	0.365611	0.483503
ENSMUSG00000019795	Pcmt1	285.569	316.302	316.302	367.975	388.68	429.004	420.166	360.571	-0.39099	0.156026	-2.50593	0.012213	0.0344036
ENSMUSG00000019797	1700021F05Rik	66.7216	78.6386	78.6386	84.7908	57.8434	64.1641	78.5428	72.7628	0.0569629	0.285661	0.199407	0.841944	0.88925
ENSMUSG00000019802	Sec63	312.257	373.97	373.97	479.109	329.425	462.578	400.339	390.236	-0.23977	0.203331	-1.17921	0.238315	0.350332
ENSMUSG00000019804	Snx3	1805.04	2332.94	2332.94	2300.88	1946.22	1986.1	1994.07	2099.74	0.0663224	0.155594	0.426254	0.669923	0.760023
ENSMUSG00000019806	Aig1	178.814	206.208	206.208	78.2051	105.106	128.328	89.981	141.836	0.935578	0.252192	3.70979	0.000207429	0.00128098
ENSMUSG00000019809	Pex3	67.6113	83.8812	83.8812	113.603	79.7111	80.5781	110.57	88.548	-0.288566	0.283409	-1.0182	0.308585	0.426052
ENSMUSG00000019810	Fuca2	503.526	167.762	167.762	667.624	726.57	716.996	762.551	530.399	-1.25252	0.365244	-3.42926	0.000605224	0.00308702
ENSMUSG00000019813	Cep57l1	17.7924	6.9901	6.9901	45.2766	33.8596	19.3984	21.3514	21.6655	-1.17786	0.535272	-2.20049	0.0277719	0.0649711
ENSMUSG00000019814	Ltv1	176.145	6.9901	6.9901	280.715	202.452	189.508	165.474	146.896	-1.19898	0.636508	-1.88369	0.059607	0.119482
ENSMUSG00000019818	Cd164	443.921	153.782	153.782	1282.56	703.997	828.91	714.511	611.638	-1.65675	0.386923	-4.28186	1.85339e-05	0.000173589
ENSMUSG00000019820	Utrn	336.277	305.817	305.817	213.212	185.522	202.191	138.022	240.98	0.757659	0.217059	3.49057	0.000481984	0.00256738
ENSMUSG00000019822	Smpd2	66.7216	57.6683	57.6683	69.973	61.3705	38.0508	65.5794	59.576	0.0511202	0.332423	0.153781	0.877783	0.916066
ENSMUSG00000019823	Mical1	175.255	12.2327	12.2327	182.753	86.7652	84.3086	126.584	97.1616	-0.611523	0.618233	-0.989147	0.322591	0.4405
ENSMUSG00000019826	Zbtb24	72.0594	122.327	122.327	57.6248	35.9758	52.2266	54.1411	73.8116	1.00361	0.331889	3.02394	0.00249503	0.00959925
ENSMUSG00000019832	Rab32	686.788	368.728	368.728	915.411	768.189	866.961	779.327	679.162	-0.775557	0.257145	-3.01603	0.00256107	0.0097938
ENSMUSG00000019837	Gtf3c6	115.651	166.015	166.015	160.526	134.733	167.125	115.145	146.459	0.0360906	0.259395	0.139133	0.889345	0.924704
ENSMUSG00000019838	Slc16a10	180.593	195.723	195.723	83.9676	197.514	202.937	155.56	173.145	0.236618	0.32397	0.730369	0.465165	0.580357
ENSMUSG00000019841	Rev3l	184.152	200.965	200.965	73.2658	100.873	132.805	120.483	144.787	0.834824	0.266558	3.13186	0.001737	0.00719836
ENSMUSG00000019842	Traf3ip2	22.2405	26.2129	26.2129	19.7571	7.75949	10.4453	6.86296	17.0702	0.966202	0.515529	1.8742	0.0609035	0.121398
ENSMUSG00000019843	Fyn	282.01	510.277	510.277	551.552	336.479	246.957	316.459	393.43	0.241103	0.327183	0.736907	0.461179	0.576458
ENSMUSG00000019849	Prep	233.081	164.267	164.267	328.461	296.271	334.996	414.065	276.487	-0.840162	0.229197	-3.66568	0.000246684	0.00148036
ENSMUSG00000019850	Tnfaip3	2244.52	712.99	712.99	1693.35	2058.38	1642.9	1589.92	1522.15	-0.471975	0.372002	-1.26874	0.204533	0.31168
ENSMUSG00000019854	Reps1	99.6376	55.9208	55.9208	176.167	209.506	181.301	192.163	138.659	-1.33858	0.283509	-4.72147	2.34142e-06	3.03561e-05
ENSMUSG00000019857	Asf1a	75.6179	129.317	129.317	80.6747	71.9516	88.7851	109.045	97.8154	0.315938	0.308408	1.02442	0.305639	0.423022
ENSMUSG00000019861	Gopc	101.417	19.2228	19.2228	166.289	184.111	179.809	163.949	119.146	-1.59416	0.488781	-3.26151	0.00110822	0.00502478
ENSMUSG00000019863	Qrsl1	45.3707	20.9703	20.9703	65.0337	43.7353	41.0352	70.1547	43.8957	-0.786792	0.427819	-1.83908	0.0659038	0.129128
ENSMUSG00000019864	Rtn4ip1	73.8386	17.4752	17.4752	59.2712	53.611	35.8125	34.3148	41.6855	-0.250525	0.521549	-0.480349	0.630979	0.726788
ENSMUSG00000019866	Aim1	411.895	325.039	325.039	367.152	596.07	506.598	562.763	442.079	-0.503691	0.228056	-2.20863	0.0272005	0.0639281
ENSMUSG00000019868	Vta1	206.392	328.535	328.535	244.494	264.528	273.816	268.418	273.531	0.11843	0.225343	0.525554	0.599198	0.699522
ENSMUSG00000019872	Smpdl3a	860.264	692.02	692.02	1244.7	1222.47	1257.17	1236.86	1029.36	-0.71714	0.139699	-5.13347	2.84444e-07	5.02048e-06
ENSMUSG00000019873	Reep3	523.987	298.827	298.827	828.151	754.786	942.316	722.136	624.147	-1.07416	0.249855	-4.29914	1.71459e-05	0.000163743
ENSMUSG00000019876	Pkib	197.496	307.564	307.564	302.119	170.003	211.891	173.099	238.534	0.31831	0.292405	1.08859	0.276333	0.392674
ENSMUSG00000019877	Serinc1	1048.86	660.564	660.564	2086.02	1585.05	1430.26	1510.61	1283.13	-1.03046	0.236164	-4.36334	1.28091e-05	0.000129007
ENSMUSG00000019878	Hsf2	25.799	115.337	115.337	23.8731	30.3325	32.082	29.7395	53.2142	1.33443	0.48084	2.77522	0.00551651	0.0181888
ENSMUSG00000019897	Ccdc59	313.147	265.624	265.624	143.239	161.538	160.41	137.259	206.692	0.890631	0.187288	4.75541	1.98042e-06	2.63137e-05
ENSMUSG00000019907	Ppp1r12a	180.593	410.668	410.668	119.366	207.39	198.461	135.734	237.554	0.94342	0.346435	2.72323	0.00646478	0.0205812
ENSMUSG00000019916	P4ha1	532.883	300.574	300.574	774.642	1035.54	792.351	957.764	670.618	-1.1852	0.257128	-4.60938	4.03868e-06	4.83737e-05
ENSMUSG00000019917	2010-09-01	54.2669	33.203	33.203	83.1443	42.3245	29.0977	31.2646	43.7863	-0.166844	0.463334	-0.360094	0.718777	0.798796
ENSMUSG00000019920	Lims1	685.898	819.589	819.589	1179.66	1194.26	1151.97	1100.36	993.046	-0.576311	0.133141	-4.32857	1.5008e-05	0.000147271
ENSMUSG00000019923	Zwint	268.666	118.832	118.832	212.389	253.947	214.875	207.414	199.279	-0.360336	0.326488	-1.10367	0.269735	0.385603
ENSMUSG00000019927	Ube2d1	72.949	52.4257	52.4257	149.824	126.268	155.187	170.811	111.413	-1.27129	0.266913	-4.76293	1.90799e-06	2.55418e-05
ENSMUSG00000019929	Dcn	297.134	237.663	237.663	223.09	275.109	249.195	297.395	259.607	-0.0137987	0.201354	-0.0685298	0.945364	0.963286
ENSMUSG00000019942	Cdk1	60.4943	183.49	183.49	116.073	110.044	108.93	134.209	128.104	0.247025	0.379358	0.651165	0.51494	0.626299
ENSMUSG00000019943	Atp2b1	3385.01	7769.49	7769.49	2832.67	2904.16	2732.2	2674.27	4295.33	1.13038	0.277745	4.06985	4.70428e-05	0.000375781
ENSMUSG00000019944	Rhobtb1	38.2537	26.2129	26.2129	69.1498	13.4027	35.8125	28.2144	33.8941	-0.219962	0.521692	-0.421632	0.673293	0.76187
ENSMUSG00000019947	Arid5b	454.597	816.094	816.094	158.057	272.993	333.504	303.495	450.69	1.30603	0.313019	4.17238	3.01434e-05	0.000261487
ENSMUSG00000019948	Actr6	38.2537	20.9703	20.9703	51.8623	52.2002	42.5273	45.7531	38.9339	-0.739823	0.380843	-1.94259	0.0520653	0.107487
ENSMUSG00000019951	Uhrf1bp1l	705.47	674.544	674.544	393.495	396.439	468.547	383.563	528.086	0.731043	0.146768	4.98095	6.3274e-07	9.92344e-06
ENSMUSG00000019952	Poc1b	87.1829	1.74752	1.74752	117.719	109.338	108.93	99.1317	75.1138	-1.17991	0.664264	-1.77626	0.0756894	0.144103
ENSMUSG00000019960	Dusp6	454.597	307.564	307.564	699.73	488.142	530.473	469.732	465.4	-0.5925	0.238712	-2.48207	0.0130622	0.0361578
ENSMUSG00000019961	Tmpo	199.275	183.49	183.49	330.108	423.95	391.699	394.239	300.893	-1.00761	0.179178	-5.62349	1.87134e-08	5.06731e-07
ENSMUSG00000019966	Kitl	25.799	20.9703	20.9703	42.807	31.0379	20.8906	29.7395	27.4592	-0.401229	0.425826	-0.942237	0.346071	0.463617
ENSMUSG00000019969	Psen1	412.785	75.1435	75.1435	671.74	805.576	714.012	731.287	497.955	-1.68973	0.474245	-3.56299	0.000366652	0.00204789
ENSMUSG00000019970	Sgk1	3282.7	1448.7	1448.7	1606.09	2237.55	2293.49	2332.64	2092.84	-0.0363671	0.309368	-0.117553	0.906422	0.936452
ENSMUSG00000019971	Cep290	39.1434	164.267	164.267	51.0391	47.2623	58.9414	46.5156	81.6338	1.10938	0.449527	2.46789	0.013591	0.0371125
ENSMUSG00000019975	Ikbip	45.3707	82.1336	82.1336	110.31	90.2922	80.5781	83.8806	82.0999	-0.384248	0.318709	-1.20564	0.227957	0.339539
ENSMUSG00000019977	Hbs1l	158.353	62.9109	62.9109	151.471	232.079	235.02	156.323	151.295	-0.931336	0.380739	-2.44612	0.0144401	0.0388558
ENSMUSG00000019978	Epb41l2	902.966	1483.65	1483.65	910.472	1149.11	1049.01	979.116	1136.85	0.325372	0.218831	1.48687	0.13705	0.228581
ENSMUSG00000019979	Apaf1	346.063	318.049	318.049	246.963	253.241	308.883	359.162	307.202	0.162902	0.206194	0.79004	0.429504	0.545165
ENSMUSG00000019984	Med23	124.547	190.48	190.48	105.371	148.136	126.09	78.5428	137.664	0.520953	0.30562	1.70458	0.0882732	0.162118
ENSMUSG00000019986	Ahi1	29.3575	117.084	117.084	34.5749	16.2244	17.1602	21.3514	50.4052	1.67511	0.498659	3.35923	0.000781589	0.00378446
ENSMUSG00000019987	Arg1	6336.78	4457.93	4457.93	2111.54	4972.42	6414.17	5224.24	4853.57	0.11243	0.3304	0.340285	0.733642	0.809807
ENSMUSG00000019988	Nedd1	85.4037	5.24257	5.24257	173.698	158.717	174.586	170.049	110.42	-1.76708	0.603611	-2.92752	0.00341678	0.0123466
ENSMUSG00000019990	Pde7b	153.015	52.4257	52.4257	34.5749	71.2462	49.2422	43.4654	65.1993	0.711885	0.454934	1.56481	0.117628	0.203123
ENSMUSG00000019997	Ctgf	25.799	5.24257	5.24257	79.0283	31.7433	24.6211	30.502	28.8827	-1.30674	0.590921	-2.21135	0.0270114	0.0636028
ENSMUSG00000019998	Stx7	894.96	375.718	375.718	1353.36	1178.74	1405.64	1403.09	998.175	-1.21078	0.311099	-3.89196	9.94397e-05	0.000700663
ENSMUSG00000020003	Pex7	113.872	90.8713	90.8713	232.146	225.73	185.777	202.076	163.049	-1.05907	0.221389	-4.78373	1.72072e-06	2.35055e-05
ENSMUSG00000020009	Ifngr1	1151.17	940.168	940.168	1757.56	1592.81	1701.09	1672.27	1393.61	-0.723497	0.137022	-5.28016	1.29071e-07	2.57085e-06
ENSMUSG00000020015	Cdk17	458.155	459.599	459.599	153.117	309.674	339.473	318.746	356.909	0.680573	0.285588	2.38306	0.0171696	0.0444448
ENSMUSG00000020018	Snrpf	64.9424	195.723	195.723	52.6855	80.4165	88.0391	84.6432	108.882	0.892484	0.403711	2.2107	0.0270566	0.0636597
ENSMUSG00000020021	Fgd6	217.957	239.411	239.411	125.951	160.833	193.238	146.41	189.03	0.550408	0.222538	2.47332	0.0133864	0.0367004
ENSMUSG00000020022	Ndufa12	225.074	496.297	496.297	176.99	181.29	223.828	227.24	289.574	0.948873	0.305344	3.10755	0.00188644	0.00772783
ENSMUSG00000020023	Tmcc3	152.125	398.436	398.436	139.123	206.684	96.9922	212.752	229.221	0.863882	0.390395	2.21284	0.0269087	0.0633955
ENSMUSG00000020024	Cep83	224.185	387.95	387.95	146.532	182.701	214.875	160.136	243.475	0.878412	0.271682	3.23324	0.00122395	0.00545245
ENSMUSG00000020029	Nudt4	222.405	173.005	173.005	295.533	265.939	170.855	255.455	222.314	-0.362391	0.257446	-1.40764	0.159238	0.257127
ENSMUSG00000020034	Tcp11l2	639.638	746.193	746.193	962.334	837.319	878.152	790.003	799.976	-0.286472	0.147429	-1.94313	0.0520008	0.107395
ENSMUSG00000020038	Cry1	199.275	69.901	69.901	183.576	186.933	234.273	134.209	154.01	-0.630023	0.400095	-1.57468	0.11533	0.200154
ENSMUSG00000020042	Btbd11	0.889622	0	0	8.23211	20.4568	35.0664	28.2144	13.2656	-2.99827	0.669235	-4.48015	7.45917e-06	8.19973e-05
ENSMUSG00000020048	Hsp90b1	1571.07	2649.25	2649.25	2458.11	2610.01	2991.84	2431.78	2480.18	-0.192319	0.219542	-0.876002	0.381029	0.498897
ENSMUSG00000020053	Igf1	438.584	438.629	438.629	789.46	476.856	415.574	450.668	492.628	-0.271138	0.258975	-1.04696	0.295116	0.412192
ENSMUSG00000020056	Ccdc53	213.509	160.772	160.772	172.051	224.32	220.098	204.364	193.698	-0.18761	0.220588	-0.850498	0.395048	0.511908
ENSMUSG00000020057	Dram1	241.088	129.317	129.317	228.03	382.331	345.441	317.221	253.249	-0.875656	0.305557	-2.86577	0.00415992	0.0144416
ENSMUSG00000020063	Sirt1	60.4943	166.015	166.015	96.3157	153.779	158.918	125.821	132.48	-0.0404685	0.380232	-0.106431	0.91524	0.942414
ENSMUSG00000020064	Herc4	283.789	380.96	380.96	375.384	369.634	386.477	384.326	365.933	-0.126818	0.176297	-0.719341	0.471931	0.586473
ENSMUSG00000020069	Hnrnph3	129.885	78.6386	78.6386	60.9176	57.138	69.3867	77.0177	78.8031	0.522983	0.310481	1.68443	0.092099	0.167305
ENSMUSG00000020070	Rufy2	169.918	297.079	297.079	97.9622	61.3705	94.0078	86.1683	157.655	1.50371	0.299555	5.01981	5.17225e-07	8.29422e-06
ENSMUSG00000020074	Ccar1	442.142	501.539	501.539	548.259	456.399	403.637	354.586	458.3	0.12401	0.203022	0.61082	0.541319	0.650117
ENSMUSG00000020075	Ddx21	136.112	232.421	232.421	190.162	326.604	249.195	222.665	227.083	-0.298196	0.291283	-1.02373	0.305962	0.423164
ENSMUSG00000020076	Ddx50	217.068	373.97	373.97	203.333	255.358	158.172	193.688	253.651	0.633058	0.278371	2.27415	0.022957	0.0561766
ENSMUSG00000020077	Srgn	3311.17	3222.43	3222.43	4507.91	3909.37	4338.53	4426.61	3848.35	-0.398824	0.107903	-3.69612	0.000218917	0.00134032
ENSMUSG00000020078	Vps26a	979.474	539.985	539.985	1418.39	1302.18	1510.09	1359.63	1092.82	-0.988888	0.243465	-4.06173	4.87114e-05	0.000386225
ENSMUSG00000020079	Supv3l1	72.0594	83.8812	83.8812	30.4588	50.7894	35.0664	61.7667	59.7004	0.781988	0.350824	2.22901	0.0258134	0.0613965
ENSMUSG00000020085	Aifm2	245.536	122.327	122.327	190.985	149.546	95.5	160.898	155.303	0.132354	0.352394	0.375584	0.707226	0.789531
ENSMUSG00000020087	Tysnd1	84.5141	166.015	166.015	136.653	121.33	76.1016	111.332	123.137	0.28859	0.337419	0.855286	0.392393	0.509423
ENSMUSG00000020088	Sar1a	607.612	454.356	454.356	769.703	656.735	718.488	691.634	621.841	-0.474473	0.174276	-2.72254	0.00647826	0.0206163
ENSMUSG00000020089	Ppa1	74.7282	13.9802	13.9802	102.901	113.571	120.867	104.47	77.7853	-1.39274	0.503892	-2.76398	0.00571015	0.0187005
ENSMUSG00000020091	Eif4ebp2	60.4943	92.6188	92.6188	116.073	86.0597	88.7851	75.4926	87.4489	-0.167714	0.301361	-0.556521	0.577855	0.681674
ENSMUSG00000020092	Pald1	203.723	64.6584	64.6584	508.745	281.458	189.508	303.495	230.892	-1.34432	0.442736	-3.03638	0.00239435	0.0092992
ENSMUSG00000020097	Sgpl1	2013.21	1391.03	1391.03	3516.76	2940.14	3595.43	2872.53	2531.45	-0.993255	0.195235	-5.0875	3.62822e-07	6.21914e-06
ENSMUSG00000020100	Slc29a3	345.173	227.178	227.178	562.253	707.524	643.879	642.068	479.322	-1.22042	0.21519	-5.67136	1.41667e-08	3.99808e-07
ENSMUSG00000020101	Vsir	997.266	615.129	615.129	2075.32	1530.73	1601.12	1756.92	1313.09	-1.19136	0.229642	-5.1879	2.12682e-07	3.88496e-06
ENSMUSG00000020102	Slc16a7	155.684	38.4455	38.4455	232.969	181.29	179.062	163.186	141.297	-1.11294	0.452558	-2.45921	0.0139244	0.0378391
ENSMUSG00000020107	Anapc16	136.112	152.035	152.035	147.355	141.787	165.633	170.811	152.252	-0.0956462	0.202594	-0.472107	0.636851	0.732053
ENSMUSG00000020108	Ddit4	39.1434	33.203	33.203	0.823211	29.6271	45.5117	38.1276	31.377	0.214734	0.637596	0.336787	0.736277	0.811962
ENSMUSG00000020109	Dnajb12	78.2867	120.579	120.579	72.4426	73.3624	98.4844	106.757	95.7845	0.253143	0.300734	0.841752	0.399927	0.516683
ENSMUSG00000020111	Micu1	440.363	560.955	560.955	351.511	291.333	258.895	285.957	392.853	0.791615	0.192212	4.11844	3.81443e-05	0.000317256
ENSMUSG00000020114	Cand1	167.249	232.421	232.421	433.832	411.253	390.207	254.692	303.154	-0.7995	0.258084	-3.09783	0.00194941	0.00793716
ENSMUSG00000020115	Tbk1	565.799	606.391	606.391	489.811	502.956	554.348	586.402	558.871	0.149002	0.143839	1.03589	0.300251	0.417239
ENSMUSG00000020116	Pno1	197.496	120.579	120.579	219.797	227.847	257.402	195.976	191.382	-0.585962	0.259572	-2.25741	0.0239822	0.0581663
ENSMUSG00000020120	Plek	4991.67	3737.95	3737.95	5298.19	4659.92	5292.79	4549.38	4609.69	-0.247928	0.163442	-1.51692	0.129287	0.218841
ENSMUSG00000020122	Egfr	19.5717	6.9901	6.9901	80.6747	21.1622	15.668	22.8765	24.8476	-1.19634	0.605225	-1.97669	0.0480763	0.100749
ENSMUSG00000020124	Usp15	397.661	730.465	730.465	451.12	418.307	511.074	438.467	525.366	0.427294	0.249082	1.71547	0.0862588	0.159422
ENSMUSG00000020128	Vps54	260.659	101.356	101.356	274.129	310.379	377.523	293.582	245.569	-0.939261	0.353505	-2.657	0.00788401	0.0241487
ENSMUSG00000020130	Tbc1d15	384.317	585.421	585.421	624.817	523.413	596.129	562.763	551.754	-0.15604	0.204828	-0.761809	0.446174	0.561709
ENSMUSG00000020132	Rab21	94.2999	178.247	178.247	154.764	239.839	304.406	271.468	203.039	-0.660747	0.327807	-2.01566	0.0438356	0.0938049
ENSMUSG00000020133	2310011J03Rik	133.443	375.718	375.718	154.764	150.957	129.074	118.195	205.41	1.01085	0.357429	2.8281	0.00468253	0.0158796
ENSMUSG00000020134	Peli1	277.562	211.45	211.45	514.507	476.856	386.477	562	377.186	-1.02106	0.214698	-4.7558	1.97662e-06	2.62959e-05
ENSMUSG00000020137	Thap2	41.8122	66.4059	66.4059	28.8124	35.9758	63.418	32.0272	47.8368	0.476948	0.405117	1.17731	0.239072	0.351203
ENSMUSG00000020143	Dock2	2901.06	1059	1059	1429.09	1733.19	1683.19	1683.71	1649.75	0.0348483	0.340296	0.102406	0.918434	0.944665
ENSMUSG00000020149	Rab1a	1865.54	1079.97	1079.97	2415.3	2337.02	2684.45	2546.92	2001.31	-0.868473	0.227627	-3.81533	0.000136	0.000907456
ENSMUSG00000020150	Gamt	54.2669	176.5	176.5	27.9892	47.9677	35.0664	32.0272	78.6168	1.70839	0.433446	3.94143	8.09983e-05	0.000589359
ENSMUSG00000020152	Actr2	989.259	641.341	641.341	1196.95	1608.33	1775.7	1908.67	1251.66	-1.06254	0.240842	-4.41176	1.02531e-05	0.000107202
ENSMUSG00000020153	Ndufs7	446.59	1015.31	1015.31	336.693	347.061	359.617	340.86	551.635	1.19579	0.289125	4.1359	3.53565e-05	0.000298479
ENSMUSG00000020156	Mum1	179.704	48.9307	48.9307	162.996	114.276	105.945	109.807	110.084	-0.34806	0.452018	-0.770013	0.441292	0.557005
ENSMUSG00000020163	Uqcr11	557.793	1695.1	1695.1	391.849	343.534	414.828	388.901	783.872	1.65947	0.342735	4.84186	1.28628e-06	1.83686e-05
ENSMUSG00000020166	Cnot2	265.997	153.782	153.782	259.312	354.82	293.215	281.381	251.756	-0.600176	0.267926	-2.24008	0.0250858	0.0601879
ENSMUSG00000020167	Tcf3	138.781	3.49505	3.49505	161.349	149.546	164.887	116.67	105.461	-1.05516	0.657752	-1.60419	0.108672	0.191118
ENSMUSG00000020170	Frs2	71.1697	45.4356	45.4356	102.901	96.6409	117.137	94.5564	81.8966	-0.858363	0.294091	-2.9187	0.0035149	0.0126201
ENSMUSG00000020171	Yeats4	116.54	206.208	206.208	157.233	124.152	131.312	117.433	151.298	0.384096	0.281277	1.36554	0.172082	0.272236
ENSMUSG00000020178	Adora2a	47.15	0	0	5.76248	19.7514	20.1445	19.0638	15.9817	-0.00649214	0.699687	-0.00927864	0.992597	0.99487
ENSMUSG00000020180	Snrpd3	195.717	401.931	401.931	236.262	252.536	286.5	293.582	295.494	0.297672	0.285099	1.0441	0.296439	0.413283
ENSMUSG00000020184	Mdm2	1439.41	1293.17	1293.17	788.636	1166.04	1223.59	1152.98	1193.86	0.303896	0.194058	1.566	0.117348	0.202869
ENSMUSG00000020186	Csrp2	61.3839	69.901	69.901	27.9892	51.4948	37.3047	51.0909	52.7236	0.62575	0.344148	1.81826	0.0690248	0.134088
ENSMUSG00000020189	Osbpl8	1506.13	2256.05	2256.05	910.472	955.122	1231.8	998.18	1444.83	0.947074	0.207695	4.55993	5.1171e-06	5.93628e-05
ENSMUSG00000020190	Mknk2	369.193	333.777	333.777	339.163	487.437	691.629	636.73	455.958	-0.615138	0.268081	-2.2946	0.0217563	0.0538421
ENSMUSG00000020196	Cabin1	215.288	328.535	328.535	212.389	238.428	262.625	214.277	257.154	0.30903	0.227966	1.3556	0.175226	0.27626
ENSMUSG00000020198	Ap3d1	896.739	566.198	566.198	591.889	509.304	443.926	473.544	578.257	0.415218	0.229673	1.80787	0.0706268	0.136407
ENSMUSG00000020205	Phlda1	52.4877	143.297	143.297	12.3482	55.7272	59.6875	52.616	74.2087	1.11577	0.504971	2.20958	0.0271342	0.0638047
ENSMUSG00000020211	Sf3a2	25.799	59.4158	59.4158	38.6909	62.7813	90.2773	73.2049	58.5122	-0.431159	0.424716	-1.01517	0.310025	0.427378
ENSMUSG00000020212	Mdm1	66.7216	106.599	106.599	93.0229	49.3785	21.6367	49.5658	70.5034	0.706329	0.45245	1.56112	0.118495	0.204256
ENSMUSG00000020219	Timm13	330.939	999.584	999.584	310.351	322.371	355.887	326.372	520.727	1.15757	0.344803	3.35718	0.000787414	0.00380922
ENSMUSG00000020220	Vps13d	326.491	671.049	671.049	96.3157	144.609	161.902	124.296	313.673	1.96538	0.3113	6.31347	2.72855e-10	1.31462e-08
ENSMUSG00000020224	Llph	163.69	344.262	344.262	141.592	154.484	147.727	155.56	207.368	0.872252	0.294331	2.96351	0.00304156	0.0112336
ENSMUSG00000020225	Tmbim4	544.449	576.683	576.683	431.363	524.118	490.184	600.128	534.801	0.142458	0.170381	0.836113	0.403091	0.519746
ENSMUSG00000020227	Irak3	329.16	131.064	131.064	220.621	399.261	256.656	386.613	264.92	-0.617388	0.377875	-1.63384	0.102292	0.182057
ENSMUSG00000020228	Helb	144.119	183.49	183.49	122.658	121.33	123.105	113.62	141.688	0.48203	0.209227	2.30386	0.0212305	0.0527231
ENSMUSG00000020230	Prmt2	186.821	57.6683	57.6683	268.367	193.987	170.855	197.501	161.838	-0.924302	0.41589	-2.22247	0.0262519	0.0621905
ENSMUSG00000020231	Dip2a	87.1829	55.9208	55.9208	91.3765	90.2922	92.5156	74.73	78.277	-0.354016	0.294319	-1.20283	0.229042	0.340538
ENSMUSG00000020232	Hmg20b	70.2801	124.074	124.074	54.3319	83.9435	89.5312	69.3922	87.9468	0.47035	0.330336	1.42385	0.154489	0.250937
ENSMUSG00000020234	4930404N11Rik	23.1302	1.74752	1.74752	7.4089	14.1082	15.668	17.5387	11.6213	-0.358542	0.666728	-0.537763	0.59074	0.692445
ENSMUSG00000020235	Fzr1	273.114	57.6683	57.6683	204.156	267.35	276.055	267.655	200.524	-0.832712	0.469872	-1.77221	0.0763598	0.144967
ENSMUSG00000020238	Ncln	336.277	248.148	248.148	397.611	384.447	335.742	301.208	321.655	-0.338027	0.209891	-1.61049	0.107292	0.189153
ENSMUSG00000020241	Col6a2	40.033	69.901	69.901	21.4035	85.3543	32.8281	69.3922	55.5447	0.161507	0.485516	0.332649	0.739399	0.814146
ENSMUSG00000020246	Hcfc2	73.8386	61.1633	61.1633	87.2604	110.044	93.2617	90.7436	82.4964	-0.512831	0.261204	-1.96333	0.0496075	0.103451
ENSMUSG00000020248	Nfyb	68.5009	50.6782	50.6782	153.117	105.106	88.0391	79.3053	85.0607	-0.839385	0.339195	-2.47464	0.0133372	0.0366348
ENSMUSG00000020250	Txnrd1	1150.28	674.544	674.544	652.807	1017.2	1271.34	1017.24	922.566	-0.235233	0.286214	-0.82188	0.411145	0.527671
ENSMUSG00000020253	Ppm1m	147.677	82.1336	82.1336	174.521	113.571	101.469	151.748	121.893	-0.341745	0.333947	-1.02335	0.306142	0.423171
ENSMUSG00000020255	D10Wsu102e	523.098	800.366	800.366	339.986	338.596	367.078	335.523	500.716	1.00915	0.203497	4.95906	7.0834e-07	1.10122e-05
ENSMUSG00000020257	Wdr82	93.4103	173.005	173.005	171.228	118.508	96.2461	125.058	135.78	0.176747	0.32363	0.546141	0.584969	0.68779
ENSMUSG00000020260	Pofut2	348.732	405.426	405.426	391.025	285.69	258.895	253.167	335.48	0.367715	0.220985	1.66398	0.0961159	0.173219
ENSMUSG00000020261	Slc36a1	65.832	94.3663	94.3663	84.7908	62.0759	76.8476	56.4288	76.3868	0.251667	0.301991	0.833361	0.404641	0.5212
ENSMUSG00000020262	Adarb1	17.7924	223.683	223.683	61.7409	21.1622	25.3672	18.3012	84.5329	1.75788	0.593081	2.96399	0.00303682	0.0112239
ENSMUSG00000020263	Appl2	635.19	279.604	279.604	386.909	340.712	361.855	341.623	375.071	0.152799	0.311333	0.49079	0.623575	0.720977
ENSMUSG00000020264	Slc36a2	81.8452	52.4257	52.4257	18.9339	51.4948	74.6094	55.6662	55.343	0.280737	0.454074	0.618263	0.536402	0.645009
ENSMUSG00000020265	Sumo3	519.539	407.173	407.173	712.901	568.559	421.543	565.05	514.563	-0.337663	0.22715	-1.48652	0.137141	0.228581
ENSMUSG00000020267	Hint1	589.819	1230.26	1230.26	753.238	548.807	599.113	606.991	794.069	0.666326	0.278956	2.38864	0.0169107	0.0439023
ENSMUSG00000020271	Fbxw11	554.234	164.267	164.267	712.901	544.575	573	509.384	460.376	-0.896151	0.397866	-2.2524	0.0242973	0.0587258
ENSMUSG00000020272	Stk10	155.684	50.6782	50.6782	279.892	210.212	221.59	283.669	178.915	-1.3807	0.396554	-3.48175	0.000498153	0.00263775
ENSMUSG00000020273	Papolg	62.2735	19.2228	19.2228	52.6855	64.8975	47.75	39.6527	43.6721	-0.49583	0.472426	-1.04954	0.293929	0.411124
ENSMUSG00000020275	Rel	1132.49	1384.04	1384.04	918.704	994.625	1020.66	805.254	1091.4	0.467706	0.159709	2.9285	0.00340606	0.012312
ENSMUSG00000020277	Pfkl	628.073	506.782	506.782	375.384	797.111	833.387	677.908	617.918	-0.280181	0.285311	-0.98202	0.32609	0.443691
ENSMUSG00000020280	Pus10	132.554	33.203	33.203	99.6086	98.7571	136.535	94.5564	89.7738	-0.584227	0.468241	-1.24771	0.212139	0.321211
ENSMUSG00000020282	Rhbdf1	32.916	0	0	161.349	75.4786	79.0859	96.844	63.6677	-1.93231	0.673667	-2.86835	0.00412623	0.0143502
ENSMUSG00000020283	Pex13	154.794	125.822	125.822	153.117	162.244	188.016	172.337	154.593	-0.300589	0.211975	-1.41804	0.15618	0.253067
ENSMUSG00000020284	1810043G02Rik	106.755	230.673	230.673	86.4372	118.508	122.359	115.908	144.473	0.718791	0.325954	2.20519	0.0274408	0.0643372
ENSMUSG00000020287	Mpg	23.1302	50.6782	50.6782	45.2766	19.046	30.5898	16.0136	33.6304	0.48701	0.486932	1.00016	0.317233	0.434793
ENSMUSG00000020288	Ahsa2	80.066	27.9604	27.9604	109.487	78.3003	102.215	98.3691	74.9083	-0.958727	0.413776	-2.31702	0.0205027	0.0513455
ENSMUSG00000020289	Nprl3	83.6244	153.782	153.782	56.8016	37.3866	41.7812	36.6025	80.5372	1.48615	0.34107	4.35732	1.31663e-05	0.000131984
ENSMUSG00000020290	Xpo1	429.687	166.015	166.015	401.727	526.94	318.582	439.992	349.851	-0.672094	0.359556	-1.86923	0.0615905	0.122335
ENSMUSG00000020300	Cpeb4	381.648	555.713	555.713	423.954	311.085	464.816	319.509	430.348	0.374491	0.240779	1.55533	0.119868	0.206094
ENSMUSG00000020305	Asb3	58.715	106.599	106.599	72.4426	84.6489	74.6094	107.52	87.3048	0.0744823	0.325243	0.229005	0.818865	0.872785
ENSMUSG00000020307	Cdc34	157.463	304.069	304.069	110.31	105.811	70.8789	67.8671	160.067	1.42929	0.329121	4.34275	1.40709e-05	0.000139175
ENSMUSG00000020308	Tpgs1	139.671	262.129	262.129	194.278	98.7571	83.5625	106.757	163.897	0.804797	0.365815	2.20001	0.0278061	0.0650097
ENSMUSG00000020309	Chac2	25.799	12.2327	12.2327	16.4642	30.3325	40.2891	17.5387	22.127	-0.506389	0.519107	-0.9755	0.329312	0.447165
ENSMUSG00000020311	Erlec1	32.916	41.9406	41.9406	37.0445	52.9056	32.082	60.2415	42.7244	-0.220471	0.379379	-0.581137	0.561148	0.666893
ENSMUSG00000020315	Sptbn1	202.834	90.8713	90.8713	683.265	395.028	402.144	287.482	307.499	-1.63277	0.376298	-4.33904	1.43108e-05	0.000141077
ENSMUSG00000020319	Wdpcp	56.9358	40.1931	40.1931	36.2213	26.8055	17.9062	16.0136	33.4669	0.835348	0.427441	1.9543	0.0506656	0.105225
ENSMUSG00000020321	Mdh1	515.981	353	353	977.975	715.283	587.922	632.155	590.759	-0.805583	0.251545	-3.20254	0.00136223	0.00594955
ENSMUSG00000020326	Ccng1	386.985	155.53	155.53	397.611	401.377	435.719	456.768	341.36	-0.799721	0.332439	-2.40561	0.0161453	0.0423884
ENSMUSG00000020328	Nudcd2	144.119	31.4554	31.4554	112.78	186.228	173.094	147.935	118.152	-0.985286	0.483361	-2.0384	0.0415095	0.0899359
ENSMUSG00000020329	Polrmt	78.2867	13.9802	13.9802	105.371	98.0517	118.629	77.0177	72.1881	-1.21213	0.520164	-2.33029	0.0197908	0.0498663
ENSMUSG00000020330	Hmmr	48.9292	20.9703	20.9703	66.6801	83.9435	44.0195	60.2415	49.3935	-0.924896	0.428246	-2.15973	0.0307934	0.070632
ENSMUSG00000020334	Slc22a4	199.275	153.782	153.782	37.0445	72.657	105.199	46.5156	109.751	1.26302	0.379299	3.32987	0.000868871	0.00412309
ENSMUSG00000020340	Cyfip2	94.2999	31.4554	31.4554	51.8623	80.4165	53.7187	62.5292	57.9625	-0.192637	0.445521	-0.432386	0.665461	0.755798
ENSMUSG00000020346	Mgat1	402.999	242.906	242.906	821.565	531.172	516.297	511.672	467.074	-0.957724	0.278843	-3.43463	0.000593363	0.00304394
ENSMUSG00000020349	Ppp2ca	1945.6	1261.71	1261.71	1887.62	2279.17	2244.25	2373.06	1893.3	-0.545253	0.206476	-2.64076	0.00827209	0.0251502
ENSMUSG00000020358	Hnrnpab	1093.35	728.718	728.718	1252.1	1265.5	1179.57	1082.06	1047.15	-0.476842	0.197223	-2.41777	0.0156157	0.0413328
ENSMUSG00000020359	Phykpl	153.905	115.337	115.337	88.9068	114.276	109.676	77.0177	110.636	0.388667	0.269911	1.43998	0.149873	0.245038
ENSMUSG00000020361	Hspa4	723.263	674.544	674.544	724.426	807.692	767.73	846.432	745.519	-0.183965	0.130915	-1.40523	0.159953	0.257932
ENSMUSG00000020362	Cnot6	357.628	347.757	347.757	343.279	438.058	459.594	500.234	399.187	-0.304272	0.188527	-1.61394	0.10654	0.188201
ENSMUSG00000020363	Gfpt2	44.4811	1.74752	1.74752	12.3482	24.6893	23.875	9.91317	16.9717	-0.0646427	0.681167	-0.0948999	0.924394	0.948152
ENSMUSG00000020366	Mapk9	246.425	15.7277	15.7277	287.301	305.442	237.258	250.879	194.109	-1.14914	0.602675	-1.90673	0.0565551	0.114523
ENSMUSG00000020368	Canx	1366.46	1245.98	1245.98	2514.91	2124.69	2467.33	2224.36	1884.25	-0.850183	0.128786	-6.60151	4.06987e-11	2.5018e-09
ENSMUSG00000020372	Rack1	1020.4	1380.54	1380.54	737.597	876.116	1039.31	1029.44	1066.28	0.441958	0.200021	2.20955	0.0271361	0.0638047
ENSMUSG00000020375	Rufy1	176.145	85.6287	85.6287	357.274	230.668	240.988	254.692	204.432	-1.1382	0.326193	-3.48933	0.000484233	0.00257494
ENSMUSG00000020376	Rnf130	1192.98	1135.89	1135.89	1683.47	1641.48	1376.54	1502.23	1381.21	-0.420658	0.132331	-3.17884	0.00147867	0.00633903
ENSMUSG00000020377	Ltc4s	104.975	193.975	193.975	449.473	95.23	91.0234	103.707	176.051	-0.144522	0.513658	-0.281359	0.778435	0.842983
ENSMUSG00000020380	Rad50	124.547	232.421	232.421	140.769	182.701	130.566	154.798	171.175	0.341367	0.290665	1.17443	0.240221	0.352382
ENSMUSG00000020385	Clk4	810.445	541.732	541.732	423.954	548.807	545.394	600.89	573.279	0.250276	0.223854	1.11803	0.263553	0.379081
ENSMUSG00000020386	Sar1b	251.763	55.9208	55.9208	386.909	422.539	384.984	475.832	290.553	-1.55976	0.45011	-3.4653	0.000529646	0.00277565
ENSMUSG00000020388	Pdlim4	354.069	648.331	648.331	525.209	385.153	376.777	372.125	472.857	0.388303	0.267992	1.44893	0.147356	0.241847
ENSMUSG00000020389	Cdkl3	25.799	8.73762	8.73762	36.2213	13.4027	18.6523	23.6391	19.3128	-0.496935	0.553873	-0.8972	0.369612	0.48774
ENSMUSG00000020390	Ube2b	530.215	436.881	436.881	414.075	454.283	511.82	472.019	465.168	0.0197609	0.166216	0.118887	0.905365	0.935708
ENSMUSG00000020392	Cdkn2aipnl	126.326	174.752	174.752	227.206	170.709	135.043	160.136	166.989	-0.12987	0.268492	-0.483702	0.628597	0.724825
ENSMUSG00000020393	Kremen1	87.1829	104.851	104.851	167.935	178.468	155.934	187.588	140.973	-0.793482	0.216251	-3.66926	0.000243252	0.00146499
ENSMUSG00000020397	Med7	140.56	239.411	239.411	57.6248	87.4706	65.6562	101.419	133.079	1.31955	0.31769	4.15357	3.27332e-05	0.000279644
ENSMUSG00000020399	Havcr2	478.617	337.272	337.272	853.67	890.225	647.609	777.04	617.386	-1.01247	0.21058	-4.80802	1.52429e-06	2.12858e-05
ENSMUSG00000020400	Tnip1	247.315	169.51	169.51	84.7908	339.301	217.859	254.692	211.854	-0.177226	0.403176	-0.439575	0.660245	0.752155
ENSMUSG00000020402	Vdac1	383.427	508.53	508.53	767.233	583.372	347.68	498.709	513.926	-0.226454	0.282493	-0.801629	0.422768	0.53903
ENSMUSG00000020409	Slu7	160.132	526.005	526.005	309.527	294.86	317.836	316.459	350.118	0.351377	0.363362	0.967018	0.333535	0.451638
ENSMUSG00000020412	Ascc2	235.75	186.985	186.985	186.046	201.041	224.574	211.989	204.767	-0.00943023	0.197607	-0.047722	0.961938	0.974419
ENSMUSG00000020413	Hus1	20.4613	13.9802	13.9802	56.8016	38.092	37.3047	35.0774	30.8139	-1.20312	0.420962	-2.85803	0.0042628	0.0147128
ENSMUSG00000020415	Pttg1	161.022	321.544	321.544	176.99	220.793	205.922	176.912	226.39	0.429219	0.287969	1.49051	0.136091	0.2273
ENSMUSG00000020420	Zfp607a	52.4877	47.1832	47.1832	31.282	23.2785	12.6836	9.15061	31.8927	1.18574	0.472094	2.51166	0.0120164	0.0339751
ENSMUSG00000020422	Tns3	750.841	1015.31	1015.31	368.799	394.323	525.25	464.394	647.747	1.05494	0.205719	5.12804	2.92772e-07	5.15048e-06
ENSMUSG00000020423	Btg2	1505.24	1492.39	1492.39	904.709	1104.67	863.23	1005.04	1195.38	0.61995	0.141835	4.37093	1.23716e-05	0.000125191
ENSMUSG00000020424	Gatsl3	120.099	50.6782	50.6782	19.7571	24.6893	23.875	57.1913	49.5669	1.0749	0.485549	2.21378	0.0268441	0.0633026
ENSMUSG00000020430	Pes1	168.139	351.252	351.252	293.886	230.668	273.07	292.82	280.155	0.0788763	0.290733	0.271301	0.786159	0.848513
ENSMUSG00000020432	Tcn2	893.18	272.614	272.614	1325.37	897.984	1055.72	924.212	805.957	-1.0312	0.390014	-2.64402	0.00819288	0.0249448
ENSMUSG00000020437	Myo1g	610.281	592.411	592.411	707.962	762.546	534.203	631.392	633.029	-0.13659	0.175784	-0.777037	0.437137	0.552674
ENSMUSG00000020439	Smtn	30.2471	10.4851	10.4851	39.5141	28.9217	50.7344	31.2646	28.8075	-0.922616	0.492899	-1.87182	0.061232	0.121849
ENSMUSG00000020440	Arf5	707.249	1432.97	1432.97	457.706	423.95	390.953	388.901	747.814	1.46104	0.265377	5.50553	3.68065e-08	8.94733e-07
ENSMUSG00000020441	2310033P09Rik	48.9292	129.317	129.317	41.9838	28.2163	27.6055	34.3148	62.8119	1.4694	0.409532	3.588	0.000333219	0.00188877
ENSMUSG00000020444	Guk1	111.203	110.094	110.094	158.88	110.044	118.629	131.159	121.443	-0.222499	0.239974	-0.927182	0.353832	0.471658
ENSMUSG00000020448	Rnf185	126.326	155.53	155.53	198.394	218.676	181.301	161.661	171.06	-0.381416	0.219675	-1.73628	0.0825151	0.15419
ENSMUSG00000020451	Limk2	92.5207	132.812	132.812	34.5749	66.3083	69.3867	76.2551	86.3813	0.883725	0.344902	2.56225	0.0103996	0.0302348
ENSMUSG00000020453	Patz1	42.7018	27.9604	27.9604	27.9892	53.611	57.4492	43.4654	40.1625	-0.411529	0.405058	-1.01598	0.309641	0.427014
ENSMUSG00000020454	Eif4enif1	107.644	380.96	380.96	106.194	146.725	113.406	118.195	193.441	1.14209	0.39764	2.87217	0.0040767	0.0142126
ENSMUSG00000020455	Trim11	233.971	401.931	401.931	100.432	124.152	139.52	154.035	222.281	1.35326	0.277344	4.87935	1.06436e-06	1.56165e-05
ENSMUSG00000020456	Ogdh	822.011	491.054	491.054	1144.26	1068.69	1059.45	1030.21	872.391	-0.811435	0.222869	-3.64086	0.000271731	0.00159606
ENSMUSG00000020457	Drg1	267.776	323.292	323.292	460.998	446.523	403.637	440.755	380.896	-0.523157	0.16125	-3.24438	0.00117705	0.00528757
ENSMUSG00000020458	Rtn4	610.281	945.411	945.411	380.324	461.337	623.734	520.822	641.046	0.721056	0.246419	2.92614	0.00343193	0.0123911
ENSMUSG00000020459	Mtif2	72.0594	29.7079	29.7079	90.5532	91.703	104.453	107.52	75.1006	-1.04056	0.376342	-2.76492	0.00569368	0.0186546
ENSMUSG00000020460	Rps27a	914.531	1744.03	1744.03	497.22	771.716	792.351	716.036	1025.7	1.0339	0.277424	3.7268	0.000193929	0.00121161
ENSMUSG00000020462	Cfap36	94.2999	96.1138	96.1138	93.8461	97.3463	76.8476	110.57	95.0196	0.011685	0.250563	0.0466351	0.962804	0.974775
ENSMUSG00000020463	Smek2	501.747	487.559	487.559	494.75	517.769	607.32	627.58	532.041	-0.187568	0.159879	-1.17319	0.24072	0.352946
ENSMUSG00000020464	Pnpt1	175.255	122.327	122.327	204.156	225.73	173.094	192.163	173.579	-0.477175	0.236967	-2.01368	0.0440434	0.0941987
ENSMUSG00000020471	Pold2	40.033	1.74752	1.74752	42.807	24.6893	29.0977	35.8399	25.1374	-0.755308	0.658873	-1.14636	0.251645	0.365706
ENSMUSG00000020472	Zkscan17	72.949	33.203	33.203	94.6693	47.9677	55.957	64.0543	57.429	-0.424327	0.416958	-1.01767	0.308833	0.426285
ENSMUSG00000020473	Aebp1	13.3443	5.24257	5.24257	0.823211	59.9597	16.4141	35.8399	19.5523	-1.09299	0.679663	-1.60814	0.107804	0.189962
ENSMUSG00000020474	Polm	23.1302	68.1534	68.1534	39.5141	35.9758	43.2734	35.0774	44.754	0.396169	0.428087	0.925439	0.354738	0.472277
ENSMUSG00000020476	Dbnl	513.312	347.757	347.757	606.707	552.334	520.027	515.485	486.197	-0.427978	0.203709	-2.10093	0.0356472	0.0795654
ENSMUSG00000020477	Mrps24	252.653	478.822	478.822	164.642	171.414	165.633	173.862	269.407	1.20335	0.265212	4.53731	5.6977e-06	6.49707e-05
ENSMUSG00000020482	Ccdc117	161.911	342.515	342.515	186.046	122.741	222.336	202.076	225.734	0.580552	0.330936	1.75427	0.0793841	0.149462
ENSMUSG00000020483	Dynll2	32.0264	78.6386	78.6386	55.9784	40.2082	54.4648	48.8033	55.5369	0.291133	0.392359	0.742007	0.458083	0.57326
ENSMUSG00000020484	Xbp1	1168.96	492.802	492.802	1252.1	991.098	1137.05	1040.12	939.277	-0.58504	0.313365	-1.86696	0.0619074	0.122772
ENSMUSG00000020485	Supt4a	193.938	351.252	351.252	189.339	232.079	245.465	261.555	260.697	0.342786	0.270004	1.26956	0.204243	0.311416
ENSMUSG00000020495	Smg8	61.3839	1.74752	1.74752	125.951	37.3866	84.3086	93.0313	57.9367	-1.25739	0.664025	-1.89358	0.0582803	0.11731
ENSMUSG00000020496	Rnf187	747.282	706	706	656.099	525.529	493.168	567.338	628.774	0.357442	0.159749	2.23753	0.025252	0.0604905
ENSMUSG00000020513	Tubd1	14.2339	3.49505	3.49505	25.5196	16.2244	26.8594	39.6527	18.4971	-1.42888	0.576322	-2.47931	0.0131636	0.0363068
ENSMUSG00000020514	Mrpl22	76.5075	111.842	111.842	67.5033	81.1219	85.0547	89.2185	89.0127	0.282522	0.274965	1.02748	0.304193	0.421402
ENSMUSG00000020515	Cnot8	232.191	321.544	321.544	435.479	355.525	428.258	344.673	348.459	-0.42008	0.207783	-2.02172	0.0432051	0.0926281
ENSMUSG00000020516	Rps6kb1	314.036	450.861	450.861	192.631	227.847	281.277	211.227	304.106	0.799685	0.231263	3.4579	0.000544409	0.00283441
ENSMUSG00000020519	Sap30l	38.2537	66.4059	66.4059	53.5087	35.9758	35.0664	61.0041	50.9458	0.259149	0.381773	0.678802	0.497263	0.609876
ENSMUSG00000020520	Galnt10	120.099	22.7178	22.7178	323.522	241.249	173.84	235.628	162.825	-1.7994	0.495082	-3.63455	0.000278465	0.00163024
ENSMUSG00000020521	Rnft1	386.985	274.361	274.361	434.656	367.517	317.836	360.687	345.201	-0.233183	0.216035	-1.07937	0.280422	0.397165
ENSMUSG00000020522	Mfap3	192.158	183.49	183.49	363.859	352.704	340.219	304.258	274.311	-0.852712	0.169544	-5.02945	4.91879e-07	7.98352e-06
ENSMUSG00000020523	Fam114a2	161.022	197.47	197.47	187.692	208.095	164.141	184.537	185.775	-0.0144222	0.20255	-0.0712031	0.943236	0.961851
ENSMUSG00000020525	Ppm1d	59.6047	55.9208	55.9208	112.78	50.7894	69.3867	91.5061	70.8441	-0.466313	0.354259	-1.31631	0.188071	0.291749
ENSMUSG00000020526	Znhit3	64.0528	82.1336	82.1336	23.0499	26.8055	25.3672	46.5156	50.0083	1.21555	0.370568	3.28025	0.00103716	0.00476157
ENSMUSG00000020528	Prpsap2	72.0594	52.4257	52.4257	65.8569	56.4326	105.199	62.5292	66.7041	-0.266094	0.347983	-0.764676	0.444465	0.560018
ENSMUSG00000020530	Ggnbp2	491.071	1162.1	1162.1	611.646	550.218	566.285	504.046	721.068	0.712092	0.296645	2.40049	0.0163732	0.0428604
ENSMUSG00000020532	Acaca	92.5207	80.3861	80.3861	19.7571	40.9136	52.9727	51.0909	59.7182	0.951728	0.38535	2.46978	0.0135198	0.0369651
ENSMUSG00000020534	Shmt1	30.2471	5.24257	5.24257	13.9946	20.4568	39.543	14.4885	18.4593	-0.476118	0.617657	-0.770845	0.440799	0.556514
ENSMUSG00000020536	Llgl1	247.315	87.3762	87.3762	263.428	265.939	235.02	199.026	197.926	-0.700053	0.377804	-1.85295	0.063889	0.125789
ENSMUSG00000020537	Drg2	169.918	183.49	183.49	139.946	133.322	172.348	138.784	160.185	0.283089	0.205258	1.37919	0.167837	0.266822
ENSMUSG00000020538	Srebf1	234.86	188.733	188.733	316.936	260.295	297.691	250.879	248.304	-0.445026	0.198864	-2.23784	0.0252318	0.0604839
ENSMUSG00000020544	Cox11	23.1302	36.698	36.698	13.9946	19.7514	16.4141	12.2008	22.6982	0.911654	0.436073	2.0906	0.0365639	0.081189
ENSMUSG00000020547	Bzw2	42.7018	26.2129	26.2129	70.7962	112.865	151.457	122.771	79.0024	-1.68008	0.375621	-4.47282	7.71959e-06	8.44261e-05
ENSMUSG00000020549	Elac2	71.1697	148.54	148.54	118.542	84.6489	102.961	86.9308	108.762	0.289143	0.331148	0.873153	0.38258	0.500131
ENSMUSG00000020553	Pctp	88.0726	8.73762	8.73762	127.598	126.973	105.945	115.908	83.1389	-1.34642	0.575838	-2.33819	0.0193772	0.0489626
ENSMUSG00000020561	Twistnb	104.086	263.876	263.876	156.41	171.414	182.047	147.935	184.235	0.325889	0.336375	0.968826	0.332632	0.450479
ENSMUSG00000020564	Atxn7l1	365.635	506.782	506.782	169.582	280.752	224.574	287.482	334.513	0.898555	0.253937	3.53849	0.000402415	0.0022073
ENSMUSG00000020570	Sypl	724.152	704.252	704.252	1033.95	1173.09	1219.12	1052.32	944.449	-0.648929	0.13195	-4.91799	8.74366e-07	1.32093e-05
ENSMUSG00000020571	Pdia6	1388.7	1076.47	1076.47	1355.01	1358.62	1723.48	1511.38	1355.73	-0.325551	0.173174	-1.87991	0.0601204	0.120331
ENSMUSG00000020572	Nampt	604.053	419.406	419.406	702.199	929.022	964.699	906.673	706.494	-0.838939	0.211874	-3.95962	7.50691e-05	0.000556052
ENSMUSG00000020573	Pik3cg	252.653	316.302	316.302	744.183	602.418	484.961	624.529	477.335	-1.03764	0.209706	-4.94808	7.49497e-07	1.15847e-05
ENSMUSG00000020576	Nbas	87.1829	26.2129	26.2129	65.8569	76.184	79.832	77.0177	62.6428	-0.574719	0.444903	-1.29178	0.196432	0.301759
ENSMUSG00000020577	Tspan13	60.4943	62.9109	62.9109	123.482	90.2922	87.293	93.7938	83.0252	-0.643001	0.273375	-2.35208	0.0186687	0.047577
ENSMUSG00000020580	Rock2	487.513	1202.3	1202.3	693.144	596.775	639.402	519.297	762.961	0.619372	0.308798	2.00575	0.0448826	0.0954782
ENSMUSG00000020585	Laptm4a	925.207	576.683	576.683	1981.47	1554.01	1569.04	1689.81	1267.56	-1.25586	0.221578	-5.6678	1.44646e-08	4.0714e-07
ENSMUSG00000020589	Fam49a	188.6	167.762	167.762	276.599	323.077	197.715	344.673	238.027	-0.681892	0.251408	-2.71229	0.00668195	0.021094
ENSMUSG00000020590	Snx13	349.621	274.361	274.361	384.44	380.92	417.812	398.052	354.224	-0.385688	0.170946	-2.2562	0.0240578	0.0582979
ENSMUSG00000020592	Sdc1	786.426	838.812	838.812	190.162	838.024	872.184	719.848	726.324	0.296304	0.403336	0.734632	0.462563	0.577718
ENSMUSG00000020593	Lpin1	87.1829	103.104	103.104	122.658	110.044	109.676	74.73	101.5	-0.0949568	0.275312	-0.344906	0.730165	0.807598
ENSMUSG00000020594	Pum2	95.1895	372.223	372.223	154.764	142.492	148.473	137.259	203.232	0.849617	0.404353	2.10118	0.0356255	0.0795457
ENSMUSG00000020598	Nrcam	0	0	0	8.23211	0	5.96875	5.33786	2.79125	-0.944191	0.632823	-1.49203	0.135691	0.226774
ENSMUSG00000020604	Arsg	32.0264	3.49505	3.49505	116.896	27.5109	47.0039	17.5387	35.4237	-1.32638	0.648332	-2.04583	0.0407731	0.088568
ENSMUSG00000020605	Hs1bp3	67.6113	52.4257	52.4257	88.9068	61.3705	53.7187	53.3786	61.4053	-0.140005	0.33269	-0.420826	0.673882	0.762412
ENSMUSG00000020608	Smc6	229.522	515.52	515.52	296.356	300.504	355.141	318.746	361.615	0.379034	0.296297	1.27924	0.200813	0.307149
ENSMUSG00000020610	Amz2	202.834	412.416	412.416	102.901	83.2381	98.4844	125.058	205.335	1.64796	0.308136	5.34816	8.88525e-08	1.85618e-06
ENSMUSG00000020611	Gna13	4059.34	2563.62	2563.62	1975.71	2949.31	2693.4	2662.07	2781.01	0.246491	0.231215	1.06607	0.286392	0.403325
ENSMUSG00000020612	Prkar1a	2276.54	2654.49	2654.49	2720.71	3143.3	2929.16	3134.85	2787.65	-0.237194	0.128816	-1.84134	0.0655724	0.128643
ENSMUSG00000020614	Fam20a	77.3971	141.549	141.549	103.725	92.4084	57.4492	79.3053	99.0548	0.486532	0.338165	1.43874	0.150224	0.245574
ENSMUSG00000020621	Rdh14	38.2537	22.7178	22.7178	69.973	85.3543	76.8476	77.7802	56.2349	-1.34101	0.338072	-3.96664	7.28934e-05	0.000541813
ENSMUSG00000020628	Trappc12	217.068	129.317	129.317	267.544	158.717	199.953	158.611	180.075	-0.280639	0.308624	-0.909323	0.363179	0.481121
ENSMUSG00000020629	Adi1	137.002	155.53	155.53	125.951	126.268	154.441	125.821	140.078	0.156097	0.211919	0.73659	0.461372	0.576542
ENSMUSG00000020630	Rnaseh1	73.8386	64.6584	64.6584	56.8016	58.5488	69.3867	77.7802	66.5247	0.0502789	0.283344	0.177448	0.859156	0.901977
ENSMUSG00000020634	Ubxn2a	96.0792	47.1832	47.1832	153.941	153.779	114.152	144.122	108.063	-1.05871	0.332498	-3.18411	0.001452	0.00625478
ENSMUSG00000020635	Fkbp1b	66.7216	101.356	101.356	125.128	88.176	94.7539	97.6066	96.4427	-0.181952	0.285815	-0.636608	0.52438	0.634632
ENSMUSG00000020638	Cmpk2	96.9688	47.1832	47.1832	181.93	277.225	111.914	145.647	129.722	-1.33957	0.398041	-3.3654	0.00076432	0.00371598
ENSMUSG00000020640	Itsn2	611.17	796.871	796.871	745.829	543.869	494.66	520.822	644.299	0.340532	0.213454	1.59534	0.110636	0.19374
ENSMUSG00000020641	Rsad2	330.05	293.584	293.584	276.599	743.5	390.953	690.109	431.197	-0.731119	0.339458	-2.15379	0.031257	0.0713454
ENSMUSG00000020644	Id2	3374.34	5179.66	5179.66	1301.5	2360.29	2777.71	2405.85	3225.57	1.00583	0.279424	3.59967	0.000318622	0.00181759
ENSMUSG00000020647	Ncoa1	289.127	173.005	173.005	371.268	380.215	384.238	376.7	306.794	-0.798526	0.236212	-3.38055	0.000723405	0.00355259
ENSMUSG00000020649	Rrm2	39.1434	6.9901	6.9901	136.653	151.663	100.723	183.012	89.3106	-2.47591	0.503983	-4.91269	8.98354e-07	1.34766e-05
ENSMUSG00000020650	Bcap29	159.242	200.965	200.965	285.654	360.463	314.852	311.121	261.895	-0.760749	0.194578	-3.90973	9.23979e-05	0.00065842
ENSMUSG00000020652	Cenpo	37.3641	106.599	106.599	32.9285	24.6893	48.4961	41.9403	56.9452	1.03191	0.439336	2.34879	0.0188343	0.0478734
ENSMUSG00000020653	Klf11	151.236	40.1931	40.1931	206.626	190.46	216.367	213.514	151.227	-1.24749	0.430913	-2.895	0.00379154	0.0133975
ENSMUSG00000020654	Adcy3	74.7282	12.2327	12.2327	55.9784	55.7272	52.9727	61.0041	46.4108	-0.595001	0.545575	-1.09059	0.275452	0.391734
ENSMUSG00000020657	Dnajc27	48.9292	50.6782	50.6782	21.4035	55.7272	41.7812	20.5889	41.3981	0.460672	0.440976	1.04467	0.296177	0.412972
ENSMUSG00000020659	Cbll1	72.949	85.6287	85.6287	74.089	72.657	89.5312	71.6798	78.8805	0.0687699	0.258125	0.26642	0.789915	0.851021
ENSMUSG00000020661	Dnmt3a	423.46	333.777	333.777	288.124	324.488	383.492	357.637	349.251	0.107068	0.194083	0.551658	0.581183	0.684769
ENSMUSG00000020664	Dld	422.57	173.005	173.005	497.22	519.18	540.918	424.741	392.948	-0.886221	0.329395	-2.69045	0.00713561	0.0222515
ENSMUSG00000020668	Kif3c	21.3509	3.49505	3.49505	31.282	26.8055	32.082	35.8399	22.0501	-1.28607	0.571803	-2.24914	0.0245035	0.0590819
ENSMUSG00000020671	Rab10	842.472	676.292	676.292	1455.44	1001.68	1032.59	1075.2	965.709	-0.625427	0.198697	-3.14765	0.00164591	0.00689026
ENSMUSG00000020677	Ddx52	148.567	104.851	104.851	186.869	134.027	137.281	124.296	134.392	-0.262027	0.270269	-0.969506	0.332293	0.450176
ENSMUSG00000020680	Taf15	29.3575	20.9703	20.9703	7.4089	16.9298	14.9219	25.1642	19.389	0.484298	0.50728	0.954696	0.339732	0.45725
ENSMUSG00000020687	Cdc27	137.891	68.1534	68.1534	171.228	155.895	179.809	147.172	132.615	-0.771872	0.314209	-2.45656	0.0140276	0.0379674
ENSMUSG00000020689	Itgb3	16.9028	0	0	18.1106	10.5811	23.1289	4.57531	10.4713	-0.627642	0.699909	-0.896748	0.369853	0.487851
ENSMUSG00000020691	Mettl2	75.6179	85.6287	85.6287	76.5587	33.1542	34.3203	44.9905	62.2713	0.737086	0.378458	1.9476	0.0514622	0.106489
ENSMUSG00000020692	Nle1	23.1302	0	0	9.05532	24.6893	16.4141	23.6391	13.8468	-0.632192	0.698249	-0.905396	0.365255	0.483254
ENSMUSG00000020694	Tlk2	62.2735	106.599	106.599	74.089	73.3624	76.1016	98.3691	85.3419	0.164393	0.307629	0.534387	0.593074	0.694436
ENSMUSG00000020696	Rffl	229.522	155.53	155.53	112.78	96.6409	168.617	118.958	148.225	0.520079	0.290819	1.78832	0.0737238	0.141165
ENSMUSG00000020697	Lig3	84.5141	24.4653	24.4653	44.4534	47.9677	60.4336	32.0272	45.4752	-0.0218094	0.488497	-0.0446459	0.96439	0.975609
ENSMUSG00000020700	Map3k3	451.928	218.441	218.441	550.728	492.375	603.59	436.179	424.526	-0.766611	0.297041	-2.58083	0.00985634	0.0289784
ENSMUSG00000020705	Ddx42	400.33	382.708	382.708	241.201	376.688	258.895	265.368	329.699	0.433671	0.216053	2.00725	0.0447232	0.0952395
ENSMUSG00000020706	Ftsj3	158.353	26.2129	26.2129	178.637	193.987	223.082	182.25	141.248	-1.21752	0.509142	-2.39133	0.0167877	0.0436888
ENSMUSG00000020707	Rnf135	40.033	34.9505	34.9505	26.3428	48.6731	28.3516	33.5523	35.2648	0.0941127	0.387425	0.242918	0.808069	0.865038
ENSMUSG00000020708	Psmc5	488.402	492.802	492.802	560.607	632.045	530.473	674.095	553.032	-0.283408	0.15534	-1.82444	0.0680859	0.132698
ENSMUSG00000020709	Adap2	451.038	330.282	330.282	320.229	379.509	352.156	369.837	361.905	0.0660355	0.191827	0.344245	0.730662	0.807852
ENSMUSG00000020715	Ern1	535.552	545.228	545.228	194.278	280.752	319.328	212.752	376.16	1.07598	0.224593	4.79079	1.66128e-06	2.28394e-05
ENSMUSG00000020716	Nf1	111.203	227.178	227.178	37.8677	67.0137	91.0234	98.3691	122.833	1.23482	0.392504	3.14601	0.00165513	0.00691733
ENSMUSG00000020717	Pecam1	15.1236	64.6584	64.6584	11.525	56.4326	24.6211	35.8399	38.9798	0.452906	0.562697	0.804883	0.420887	0.537144
ENSMUSG00000020718	Polg2	27.5783	145.045	145.045	35.3981	40.9136	45.5117	23.6391	66.1614	1.30075	0.501491	2.59376	0.00949315	0.0281193
ENSMUSG00000020719	Ddx5	3255.13	4040.28	4040.28	3108.45	2943.67	3056.75	2938.11	3340.38	0.323326	0.131071	2.4668	0.0136326	0.037207
ENSMUSG00000020720	Psmd12	453.707	475.327	475.327	508.745	486.026	530.473	529.211	494.116	-0.134394	0.130609	-1.02898	0.30349	0.420755
ENSMUSG00000020721	Helz	156.573	216.693	216.693	112.78	114.276	112.66	138.784	152.637	0.687776	0.231371	2.97261	0.00295279	0.010983
ENSMUSG00000020728	Cep112	8.89622	19.2228	19.2228	6.58569	14.8136	11.1914	6.10041	12.2904	0.535194	0.563481	0.949799	0.342215	0.459725
ENSMUSG00000020733	Slc9a3r1	596.936	305.817	305.817	744.183	699.059	678.199	601.653	561.666	-0.720193	0.271449	-2.65315	0.00797455	0.0243633
ENSMUSG00000020736	Nt5c	192.158	309.312	309.312	223.913	218.676	191.746	210.464	236.512	0.336491	0.235001	1.43187	0.15218	0.248052
ENSMUSG00000020737	Hn1	781.978	940.168	940.168	1332.78	1148.4	1225.83	1277.27	1092.37	-0.487759	0.140861	-3.46269	0.000534812	0.00279354
ENSMUSG00000020738	Sumo2	950.116	899.975	899.975	877.543	1096.91	1089.3	1124	991.117	-0.188885	0.147833	-1.27769	0.20136	0.307897
ENSMUSG00000020739	Nup85	158.353	82.1336	82.1336	133.36	145.314	138.773	130.396	124.352	-0.312018	0.302677	-1.03086	0.302606	0.419965
ENSMUSG00000020740	Gga3	168.139	75.1435	75.1435	205.803	140.376	169.363	132.684	138.093	-0.551103	0.354	-1.55679	0.119522	0.205597
ENSMUSG00000020741	Cluh	223.295	73.396	73.396	135.83	196.103	188.016	125.058	145.013	-0.335581	0.414023	-0.810536	0.417632	0.533755
ENSMUSG00000020743	Mif4gd	298.023	396.688	396.688	284.008	331.542	325.297	340.098	338.906	0.173527	0.187307	0.926429	0.354223	0.472062
ENSMUSG00000020744	Slc25a19	123.657	218.441	218.441	133.36	194.693	172.348	163.949	174.984	0.151884	0.281912	0.538763	0.590051	0.69194
ENSMUSG00000020745	Pafah1b1	186.821	489.307	489.307	158.88	207.39	332.758	240.966	300.775	0.666073	0.370979	1.79545	0.0725822	0.139279
ENSMUSG00000020747	Tmem94	75.6179	24.4653	24.4653	70.7962	142.492	96.2461	125.058	79.8774	-1.19458	0.450207	-2.65341	0.0079683	0.0243581
ENSMUSG00000020752	Recql5	128.106	19.2228	19.2228	80.6747	74.0678	74.6094	68.6296	66.3618	-0.324557	0.545911	-0.594524	0.552162	0.658996
ENSMUSG00000020755	Sap30bp	110.313	64.6584	64.6584	119.366	136.144	120.867	115.145	104.45	-0.570461	0.288005	-1.98073	0.0476211	0.099952
ENSMUSG00000020766	Galk1	174.366	213.198	213.198	186.869	154.484	154.441	109.807	172.338	0.385863	0.251167	1.53628	0.124469	0.2124
ENSMUSG00000020770	Unk	185.041	61.1633	61.1633	145.708	107.927	89.5312	109.807	108.62	-0.113712	0.41961	-0.270994	0.786396	0.848682
ENSMUSG00000020773	Trim47	368.303	408.921	408.921	909.649	383.742	261.133	412.54	450.458	-0.290537	0.373617	-0.777633	0.436785	0.552294
ENSMUSG00000020774	Aspa	2.66887	41.9406	41.9406	8.23211	0.705408	8.95312	9.91317	16.3363	1.2946	0.675059	1.91776	0.0551414	0.112149
ENSMUSG00000020775	Mrpl38	152.125	185.238	185.238	146.532	143.903	151.457	123.533	155.432	0.286596	0.207687	1.37994	0.167605	0.266771
ENSMUSG00000020776	Fbf1	40.9226	8.73762	8.73762	50.2159	30.3325	50.7344	50.3284	34.287	-0.954595	0.535835	-1.78151	0.0748292	0.142847
ENSMUSG00000020777	Acox1	203.723	127.569	127.569	405.02	381.626	389.461	292.057	275.289	-1.20558	0.25276	-4.76966	1.84536e-06	2.47653e-05
ENSMUSG00000020778	Ten1	233.971	419.406	419.406	259.312	211.622	229.051	216.565	284.19	0.613294	0.257032	2.38606	0.0170298	0.0441363
ENSMUSG00000020780	Srp68	199.275	125.822	125.822	214.035	222.203	250.687	229.528	195.339	-0.573317	0.242571	-2.3635	0.0181031	0.0464009
ENSMUSG00000020781	Tsen54	74.7282	54.1732	54.1732	44.4534	43.7353	53.7187	37.365	51.7639	0.435568	0.320993	1.35694	0.174801	0.275763
ENSMUSG00000020783	Ncbp3	145.008	124.074	124.074	125.951	115.687	108.184	74.73	116.816	0.29783	0.269238	1.1062	0.26864	0.38445
ENSMUSG00000020788	Atp2a3	69.3905	5.24257	5.24257	926.936	71.9516	128.328	122.771	189.98	-1.71626	0.698456	-2.45723	0.0140014	0.0379471
ENSMUSG00000020790	Ankfy1	686.788	515.52	515.52	527.678	711.756	593.144	610.804	594.459	-0.0873664	0.192168	-0.454635	0.649372	0.742536
ENSMUSG00000020792	Exoc7	214.399	78.6386	78.6386	256.019	244.071	172.348	204.364	178.354	-0.742027	0.379312	-1.95624	0.0504366	0.104914
ENSMUSG00000020794	Ube2g1	248.204	174.752	174.752	430.54	394.323	458.102	440.755	331.633	-1.07576	0.201281	-5.34457	9.06341e-08	1.88971e-06
ENSMUSG00000020801	Med31	55.1566	125.822	125.822	49.3927	52.9056	64.9102	60.2415	76.3214	0.771588	0.360165	2.14232	0.0321681	0.0731131
ENSMUSG00000020802	Ube2o	34.6953	47.1832	47.1832	45.2766	50.0839	44.7656	54.1411	46.1898	-0.183877	0.321298	-0.572294	0.567123	0.672053
ENSMUSG00000020803	Txndc17	584.482	821.336	821.336	789.46	684.951	728.187	722.136	735.984	0.0174414	0.178866	0.0975109	0.922321	0.946751
ENSMUSG00000020806	Rhbdf2	698.353	723.475	723.475	656.099	810.513	730.426	629.867	710.316	0.0157576	0.152315	0.103454	0.917603	0.944082
ENSMUSG00000020807	4933427D14Rik	48.0396	45.4356	45.4356	51.8623	28.9217	17.1602	35.8399	38.9564	0.424306	0.429218	0.988555	0.322881	0.44067
ENSMUSG00000020812	1810032O08Rik	14.2339	57.6683	57.6683	12.3482	8.46489	17.9062	15.251	26.2201	1.36817	0.532984	2.56701	0.010258	0.0298923
ENSMUSG00000020817	Rabep1	437.694	786.386	786.386	364.683	291.333	348.426	355.349	481.465	0.943621	0.24878	3.793	0.000148837	0.000977862
ENSMUSG00000020818	Mfsd11	531.104	492.802	492.802	873.427	563.621	549.125	593.265	585.164	-0.341005	0.217263	-1.56955	0.11652	0.20183
ENSMUSG00000020821	Kif1c	58.715	92.6188	92.6188	49.3927	102.284	87.293	54.1411	76.7234	0.127213	0.371224	0.342685	0.731835	0.808481
ENSMUSG00000020823	Sec14l1	590.709	207.955	207.955	923.643	560.094	643.133	568.863	528.907	-0.920649	0.376727	-2.44381	0.014533	0.039093
ENSMUSG00000020827	Mink1	35.5849	57.6683	57.6683	34.5749	47.9677	51.4805	60.2415	49.3123	0.0280552	0.362071	0.0774854	0.938237	0.958307
ENSMUSG00000020828	Pld2	248.204	183.49	183.49	172.051	193.987	205.922	195.213	197.48	0.104585	0.210338	0.497223	0.619032	0.716964
ENSMUSG00000020829	Slc46a1	35.5849	76.8911	76.8911	69.973	25.3947	32.8281	32.0272	49.9414	0.566929	0.458489	1.23652	0.216267	0.326353
ENSMUSG00000020831	0610010K14Rik	11.5651	6.9901	6.9901	16.4642	11.2865	10.4453	9.15061	10.4131	-0.347594	0.556235	-0.624906	0.532033	0.641703
ENSMUSG00000020832	Eral1	88.0726	64.6584	64.6584	83.9676	55.7272	50.7344	73.2049	68.7176	0.142737	0.322073	0.443182	0.657634	0.749739
ENSMUSG00000020840	Blmh	182.372	89.1237	89.1237	316.936	237.017	284.262	285.194	212.004	-1.14403	0.305027	-3.75058	0.000176426	0.00112608
ENSMUSG00000020841	Cpd	749.062	625.614	625.614	1196.95	1758.58	1348.19	1610.51	1130.65	-1.12492	0.191131	-5.88558	3.96661e-09	1.32171e-07
ENSMUSG00000020843	Timm22	106.755	150.287	150.287	157.233	73.3624	97.7383	73.9675	115.661	0.400671	0.346265	1.15712	0.247222	0.360445
ENSMUSG00000020849	Ywhae	852.258	756.678	756.678	1147.56	1194.96	1176.59	1193.39	1011.16	-0.571622	0.118155	-4.83791	1.3121e-06	1.86625e-05
ENSMUSG00000020850	Prpf8	183.262	87.3762	87.3762	411.606	369.634	311.121	321.034	253.058	-1.46718	0.307257	-4.77508	1.7964e-06	2.43218e-05
ENSMUSG00000020857	Nme2	169.918	152.035	152.035	118.542	88.176	94.0078	97.6066	124.617	0.654292	0.224945	2.90867	0.00362967	0.0129631
ENSMUSG00000020859	Spag9	2163.56	4066.49	4066.49	585.303	830.265	1152.71	865.496	1961.47	1.90799	0.291874	6.53703	6.27544e-11	3.77091e-09
ENSMUSG00000020863	Luc7l3	399.44	1270.45	1270.45	218.151	271.582	364.84	282.144	582.437	1.65049	0.369345	4.46868	7.87021e-06	8.58978e-05
ENSMUSG00000020864	Ankrd40	177.924	57.6683	57.6683	228.853	270.171	350.664	270.706	201.951	-1.36497	0.397666	-3.43246	0.000598142	0.00306405
ENSMUSG00000020865	Abcc3	623.625	220.188	220.188	803.454	958.649	851.293	924.212	657.373	-1.22164	0.352346	-3.46717	0.000525974	0.00276046
ENSMUSG00000020868	Xylt2	523.098	428.143	428.143	425.6	881.054	493.914	792.291	567.463	-0.472233	0.28806	-1.63936	0.101139	0.180399
ENSMUSG00000020869	Lrrc59	993.708	232.421	232.421	881.659	933.96	754.301	961.577	712.864	-0.764029	0.433409	-1.76284	0.0779281	0.147291
ENSMUSG00000020873	Slc35b1	297.134	344.262	344.262	409.959	278.636	319.328	264.605	322.598	0.043183	0.219487	0.196745	0.844027	0.890922
ENSMUSG00000020876	Snx11	124.547	50.6782	50.6782	78.2051	70.5408	46.2578	57.9539	68.4087	0.247794	0.40864	0.606387	0.544258	0.652475
ENSMUSG00000020882	Cacnb1	11.5651	0	0	9.87854	12.6973	14.1758	20.5889	9.84366	-0.997647	0.69147	-1.44279	0.149079	0.244188
ENSMUSG00000020883	Fbxl20	270.445	188.733	188.733	167.935	124.857	177.57	115.908	176.312	0.545742	0.268383	2.03345	0.0420072	0.0906568
ENSMUSG00000020888	Dvl2	124.547	73.396	73.396	107.017	113.571	126.09	106.757	103.539	-0.290479	0.288091	-1.00829	0.313315	0.430747
ENSMUSG00000020889	Nr1d1	141.45	134.559	134.559	727.719	197.514	189.508	147.172	238.926	-1.04284	0.475058	-2.19518	0.0281509	0.0657428
ENSMUSG00000020893	Per1	109.423	312.807	312.807	105.371	215.855	173.094	192.925	203.183	0.462324	0.390251	1.18468	0.236143	0.347952
ENSMUSG00000020894	Vamp2	361.186	440.376	440.376	149.824	117.803	168.617	175.387	264.796	1.39919	0.216204	6.47161	9.69671e-11	5.34619e-09
ENSMUSG00000020897	Aurkb	47.15	54.1732	54.1732	68.3265	59.2542	52.2266	55.6662	55.8529	-0.182867	0.294055	-0.62188	0.534021	0.643231
ENSMUSG00000020898	Ctc1	120.099	82.1336	82.1336	106.194	85.3543	103.707	96.844	96.638	-0.028832	0.267851	-0.107642	0.91428	0.941841
ENSMUSG00000020899	Pfas	18.6821	33.203	33.203	13.1714	23.2785	27.6055	28.2144	25.3368	0.239712	0.457678	0.523757	0.600447	0.700522
ENSMUSG00000020900	Myh10	38.2537	145.045	145.045	27.9892	23.9839	20.1445	33.5523	62.0018	1.78489	0.463981	3.84691	0.000119618	0.000811824
ENSMUSG00000020901	Pik3r5	1413.61	905.218	905.218	1334.43	1535.67	1263.88	1342.09	1242.87	-0.338228	0.208484	-1.62232	0.104734	0.185835
ENSMUSG00000020903	Stx8	408.336	447.366	447.366	230.499	266.644	233.527	210.464	320.601	0.868769	0.166514	5.21739	1.81462e-07	3.42314e-06
ENSMUSG00000020910	Adprm	88.0726	162.52	162.52	69.1498	64.1921	82.0703	69.3922	99.7023	0.891224	0.306167	2.91091	0.00360379	0.0128874
ENSMUSG00000020914	Top2a	52.4877	66.4059	66.4059	137.476	261.001	178.316	243.254	143.621	-1.65044	0.311457	-5.29909	1.16382e-07	2.36189e-06
ENSMUSG00000020917	Acly	536.442	178.247	178.247	704.669	734.329	617.766	591.74	505.92	-1.05865	0.369848	-2.86238	0.00420469	0.0145357
ENSMUSG00000020918	Kat2a	210.84	69.901	69.901	126.775	217.266	190.254	206.651	155.941	-0.586688	0.411402	-1.42607	0.153848	0.250137
ENSMUSG00000020919	Stat5b	161.911	83.8812	83.8812	311.174	239.133	253.672	300.445	204.871	-1.24667	0.295132	-4.22412	2.39875e-05	0.000217199
ENSMUSG00000020921	Tmem101	28.4679	117.084	117.084	54.3319	42.3245	41.0352	25.1642	60.7846	0.942476	0.482088	1.95499	0.0505845	0.10514
ENSMUSG00000020922	Lsm12	241.088	188.733	188.733	181.93	308.969	336.488	277.569	246.215	-0.401591	0.26737	-1.502	0.133096	0.223499
ENSMUSG00000020923	Ubtf	262.438	326.787	326.787	356.451	346.355	364.094	288.244	324.451	-0.153578	0.18577	-0.826711	0.408401	0.524652
ENSMUSG00000020925	Ccdc43	96.9688	73.396	73.396	125.951	130.5	152.949	138.022	113.026	-0.711756	0.243027	-2.92872	0.00340363	0.0123074
ENSMUSG00000020929	Eftud2	314.036	166.015	166.015	448.65	521.296	480.484	454.481	364.425	-1.0889	0.267181	-4.0755	4.59152e-05	0.0003687
ENSMUSG00000020935	Dcakd	43.5915	75.1435	75.1435	79.8515	126.973	64.9102	62.5292	75.449	-0.356064	0.377606	-0.94295	0.345706	0.463368
ENSMUSG00000020936	Nmt1	643.197	749.688	749.688	669.271	847.9	592.398	791.528	720.524	-0.023933	0.185509	-0.129013	0.897348	0.93107
ENSMUSG00000020941	Map3k14	189.489	230.673	230.673	75.7354	164.36	141.758	179.962	173.236	0.589614	0.317911	1.85465	0.0636462	0.125463
ENSMUSG00000020946	Gosr2	604.943	176.5	176.5	530.148	524.823	490.93	502.521	429.481	-0.615158	0.395382	-1.55586	0.119742	0.205944
ENSMUSG00000020948	Klhl28	89.8518	20.9703	20.9703	131.714	124.152	99.2305	100.657	83.935	-1.15983	0.475454	-2.43942	0.014711	0.0394852
ENSMUSG00000020949	Fkbp3	115.651	146.792	146.792	140.769	142.492	142.504	124.296	137.042	-0.0226377	0.215728	-0.104936	0.916426	0.943235
ENSMUSG00000020952	Scfd1	201.944	220.188	220.188	246.963	292.039	252.18	276.044	244.221	-0.317196	0.173286	-1.83048	0.0671787	0.131241
ENSMUSG00000020954	Strn3	242.867	431.638	431.638	354.804	296.977	350.664	417.116	360.815	0.0470927	0.25906	0.181783	0.855753	0.900012
ENSMUSG00000020955	Ap4s1	83.6244	99.6089	99.6089	86.4372	100.168	98.4844	86.9308	93.5518	0.00864018	0.23891	0.036165	0.971151	0.980224
ENSMUSG00000020956	Dtd2	64.9424	96.1138	96.1138	79.8515	63.4867	83.5625	84.6432	81.2448	0.117594	0.286474	0.410486	0.681449	0.768534
ENSMUSG00000020962	Gtf2a1	262.438	164.267	164.267	335.87	336.479	379.016	305.783	278.303	-0.748011	0.237105	-3.15477	0.00160624	0.00676318
ENSMUSG00000020964	Sel1l	558.682	732.213	732.213	1052.06	861.303	975.891	818.98	818.764	-0.455003	0.179673	-2.53239	0.0113288	0.0323819
ENSMUSG00000020973	Dnaaf2	43.5915	0	0	57.6248	57.138	51.4805	65.5794	39.3449	-1.10829	0.69051	-1.60503	0.108487	0.190873
ENSMUSG00000020974	Pole2	25.799	12.2327	12.2327	27.9892	34.565	26.1133	41.1778	25.7299	-0.79177	0.459505	-1.72309	0.0848718	0.157575
ENSMUSG00000020978	Klhdc2	127.216	103.104	103.104	163.819	88.176	132.805	124.296	120.36	-0.178834	0.288134	-0.620664	0.534821	0.643759
ENSMUSG00000020982	Nemf	439.473	891.237	891.237	286.478	349.882	384.984	327.134	510.061	1.08585	0.276997	3.92007	8.8525e-05	0.000635905
ENSMUSG00000020986	Sec23a	169.028	27.9604	27.9604	243.671	153.779	270.086	182.25	153.533	-1.23752	0.517706	-2.39039	0.0168307	0.0437793
ENSMUSG00000020993	Trappc6b	319.374	361.738	361.738	397.611	310.379	267.848	329.422	335.444	0.0871856	0.199286	0.43749	0.661756	0.752789
ENSMUSG00000020994	Pnn	379.869	686.777	686.777	215.681	301.915	292.469	274.518	405.429	1.06303	0.26347	4.03473	5.46658e-05	0.000427729
ENSMUSG00000021000	Ctage5	498.188	387.95	387.95	647.867	775.949	666.262	522.348	555.216	-0.603111	0.203678	-2.9611	0.00306546	0.0113063
ENSMUSG00000021003	Galc	236.639	403.678	403.678	181.93	203.863	268.594	274.518	281.843	0.554374	0.275485	2.01236	0.0441819	0.0943097
ENSMUSG00000021007	Spata7	11.5651	0	0	16.4642	9.1703	5.22266	22.8765	9.3284	-0.880775	0.698291	-1.26133	0.207191	0.315012
ENSMUSG00000021009	Ptpn21	19.5717	36.698	36.698	37.8677	21.1622	38.7969	10.6757	28.7815	0.14876	0.512653	0.290176	0.771681	0.83847
ENSMUSG00000021012	Zc3h14	297.134	43.6881	43.6881	213.212	261.001	247.703	236.391	191.831	-0.741524	0.520828	-1.42374	0.154522	0.250951
ENSMUSG00000021013	Ttc8	24.9094	19.2228	19.2228	22.2267	24.6893	22.3828	22.8765	22.2186	-0.0964569	0.409495	-0.235551	0.813781	0.869218
ENSMUSG00000021018	Polr2h	38.2537	139.802	139.802	65.8569	62.0759	62.6719	73.2049	83.0953	0.601299	0.425113	1.41444	0.157232	0.254233
ENSMUSG00000021022	Ppp2r3c	93.4103	173.005	173.005	152.294	119.214	111.168	160.898	140.428	0.091701	0.30495	0.300708	0.763637	0.832269
ENSMUSG00000021023	1110008L16Rik	22.2405	0	0	31.282	43.7353	28.3516	36.6025	23.1731	-1.28226	0.682783	-1.87799	0.0603831	0.120744
ENSMUSG00000021024	Psma6	940.33	1354.33	1354.33	852.847	937.487	953.508	1027.16	1060	0.358397	0.184572	1.94178	0.0521641	0.107566
ENSMUSG00000021025	Nfkbia	4806.63	7993.18	7993.18	4137.46	4384.11	5944.87	5003.1	5751.79	0.495166	0.23171	2.13701	0.0325974	0.0739944
ENSMUSG00000021027	Ralgapa1	345.173	407.173	407.173	153.941	165.065	172.348	276.044	275.274	0.972398	0.26034	3.73511	0.00018763	0.00118261
ENSMUSG00000021028	Mbip	58.715	50.6782	50.6782	65.8569	60.6651	88.0391	69.3922	63.4321	-0.383519	0.297646	-1.28851	0.197569	0.303272
ENSMUSG00000021033	Gstz1	45.3707	36.698	36.698	59.2712	43.7353	41.0352	46.5156	44.1891	-0.23603	0.335543	-0.703426	0.48179	0.595767
ENSMUSG00000021036	Sptlc2	715.256	599.401	599.401	707.962	841.551	838.609	954.714	750.985	-0.380658	0.169455	-2.24637	0.0246804	0.0594287
ENSMUSG00000021037	Ahsa1	353.18	545.228	545.228	391.849	429.593	390.207	437.704	441.855	0.211684	0.208991	1.01288	0.311116	0.428518
ENSMUSG00000021038	Vipas39	309.588	223.683	223.683	194.278	242.66	277.547	291.295	251.819	0.0116166	0.238744	0.048657	0.961193	0.974125
ENSMUSG00000021039	Snw1	213.509	295.332	295.332	323.522	308.263	361.855	300.445	299.751	-0.274611	0.199583	-1.37593	0.168845	0.268146
ENSMUSG00000021040	Slirp	378.089	574.935	574.935	149.824	167.182	161.156	126.584	304.672	1.69852	0.230434	7.37096	1.69399e-13	2.28211e-11
ENSMUSG00000021044	Adck1	54.2669	0	0	60.9176	42.3245	45.5117	32.0272	33.5783	-0.690568	0.697367	-0.990251	0.322051	0.439987
ENSMUSG00000021048	Mthfd1	70.2801	5.24257	5.24257	131.714	139.671	134.297	131.921	88.3383	-1.73148	0.592149	-2.92407	0.00345489	0.0124422
ENSMUSG00000021051	Ppp2r5e	116.54	152.035	152.035	116.073	95.23	125.344	157.848	130.729	0.167513	0.268236	0.624496	0.532302	0.641883
ENSMUSG00000021054	Sgpp1	310.478	232.421	232.421	1618.43	680.718	528.234	680.196	611.843	-1.62798	0.367629	-4.42832	9.49709e-06	0.000100277
ENSMUSG00000021065	Fut8	139.671	66.4059	66.4059	284.008	137.555	149.965	176.149	145.737	-0.942433	0.378278	-2.49137	0.0127251	0.0354908
ENSMUSG00000021067	Sav1	61.3839	199.218	199.218	67.5033	64.8975	42.5273	57.1913	98.8484	1.25617	0.415867	3.02059	0.00252279	0.00968684
ENSMUSG00000021068	Nin	310.478	253.391	253.391	352.334	396.439	440.941	335.523	334.643	-0.46971	0.191708	-2.45013	0.0142803	0.0385223
ENSMUSG00000021069	Pygl	409.226	89.1237	89.1237	311.997	634.162	591.652	526.16	378.778	-1.2074	0.470317	-2.56721	0.0102521	0.0298923
ENSMUSG00000021072	Tmx1	668.106	681.534	681.534	958.218	950.184	845.324	905.911	812.973	-0.431544	0.122808	-3.51398	0.000441439	0.00238949
ENSMUSG00000021076	Actr10	293.575	183.49	183.49	488.164	371.044	383.492	391.951	327.887	-0.852882	0.242785	-3.51291	0.000443226	0.00239553
ENSMUSG00000021079	Timm9	37.3641	62.9109	62.9109	35.3981	43.7353	52.9727	49.5658	49.2654	0.222232	0.352437	0.630558	0.528329	0.637956
ENSMUSG00000021087	Rtn1	4.44811	12.2327	12.2327	6.58569	13.4027	14.1758	19.0638	11.7345	-0.39952	0.583584	-0.684597	0.493598	0.606583
ENSMUSG00000021091	Serpina3n	30.2471	12.2327	12.2327	9.05532	5.64326	22.3828	12.9634	14.9653	0.447903	0.584177	0.766726	0.443244	0.558876
ENSMUSG00000021094	Dhrs7	189.489	312.807	312.807	330.108	247.598	279.785	289.769	280.338	-0.083683	0.245201	-0.341283	0.73289	0.809145
ENSMUSG00000021096	Ppm1a	124.547	145.045	145.045	140.769	131.911	143.25	102.944	133.359	0.082935	0.232633	0.356506	0.721461	0.80041
ENSMUSG00000021102	Glrx5	153.015	353	353	185.223	178.468	233.527	163.186	231.346	0.550998	0.322554	1.70823	0.0875931	0.161145
ENSMUSG00000021103	Mnat1	70.2801	157.277	157.277	66.6801	78.3003	59.6875	74.73	94.8903	0.807051	0.345116	2.33849	0.0193618	0.0489352
ENSMUSG00000021108	Prkch	366.524	183.49	183.49	245.317	373.161	331.266	324.847	286.871	-0.354147	0.304502	-1.16304	0.244813	0.357429
ENSMUSG00000021109	Hif1a	2326.36	1513.36	1513.36	1674.41	2847.03	2848.59	3034.19	2251.04	-0.522926	0.261716	-1.99807	0.045709	0.0968318
ENSMUSG00000021111	Papola	745.503	424.648	424.648	998.555	1060.93	952.762	951.664	794.102	-0.866014	0.236622	-3.65991	0.000252306	0.00150679
ENSMUSG00000021112	Mpp5	149.456	111.842	111.842	132.537	135.438	140.266	105.995	126.768	-0.0341627	0.243894	-0.140072	0.888603	0.924203
ENSMUSG00000021113	Snapc1	128.995	152.035	152.035	115.25	131.911	106.691	93.0313	125.707	0.35223	0.235146	1.49792	0.134154	0.224835
ENSMUSG00000021114	Atp6v1d	833.576	788.133	788.133	748.299	864.83	857.262	930.313	830.078	-0.0800881	0.138327	-0.578977	0.562605	0.668142
ENSMUSG00000021115	Vrk1	128.995	62.9109	62.9109	214.858	151.663	199.207	202.076	146.089	-1.08617	0.32384	-3.35404	0.000796403	0.00384054
ENSMUSG00000021116	Eif2s1	621.846	470.084	470.084	508.745	733.624	777.43	760.264	620.296	-0.402872	0.219622	-1.83439	0.0665964	0.130246
ENSMUSG00000021120	Pigh	33.8056	48.9307	48.9307	61.7409	47.2623	35.8125	20.5889	42.4388	0.0676669	0.436486	0.155026	0.8768	0.915327
ENSMUSG00000021124	Vti1b	412.785	678.039	678.039	410.782	399.261	384.238	439.992	486.162	0.510809	0.221441	2.30676	0.0210685	0.0524188
ENSMUSG00000021125	Arg2	216.178	129.317	129.317	41.9838	150.957	244.719	133.446	149.417	0.132949	0.464838	0.286012	0.774869	0.840763
ENSMUSG00000021127	Zfp36l1	235.75	884.247	884.247	285.654	319.55	432.734	369.075	487.322	0.84417	0.391223	2.15777	0.0309457	0.0709152
ENSMUSG00000021131	Erh	241.088	288.341	288.341	181.106	193.282	269.34	245.541	243.863	0.282145	0.224825	1.25495	0.209496	0.31793
ENSMUSG00000021133	Susd6	495.519	213.198	213.198	622.348	776.654	746.84	783.14	550.128	-1.17792	0.313508	-3.75722	0.000171811	0.00110041
ENSMUSG00000021134	Srsf5	3186.63	3129.82	3129.82	1213.41	1769.87	1751.08	1625	2257.95	0.970603	0.17236	5.63124	1.78914e-08	4.86936e-07
ENSMUSG00000021135	Slc10a1	15.1236	31.4554	31.4554	1.64642	11.2865	10.4453	3.81276	15.0322	1.44258	0.604466	2.38654	0.0170079	0.0441009
ENSMUSG00000021140	Pcnx	347.842	227.178	227.178	124.305	174.941	268.594	263.843	233.412	0.346085	0.32697	1.05846	0.289846	0.406849
ENSMUSG00000021143	Pacs2	343.394	87.3762	87.3762	220.621	239.133	214.875	263.843	208.088	-0.383336	0.43656	-0.878085	0.379898	0.497659
ENSMUSG00000021147	Wdr37	189.489	323.292	323.292	135.83	134.027	117.137	125.821	192.698	1.07328	0.256329	4.18711	2.82535e-05	0.000248519
ENSMUSG00000021149	Gtpbp4	171.697	304.069	304.069	224.737	290.628	275.309	292.057	266.081	-0.0652728	0.26094	-0.250145	0.802475	0.860738
ENSMUSG00000021156	Zmynd11	374.531	386.203	386.203	290.594	354.115	310.375	322.559	346.368	0.254402	0.155144	1.63978	0.10105	0.180379
ENSMUSG00000021171	Esyt2	290.017	76.8911	76.8911	303.765	269.466	234.273	254.692	215.142	-0.743283	0.428452	-1.73481	0.0827749	0.154513
ENSMUSG00000021177	Tdp1	63.1631	92.6188	92.6188	85.614	52.9056	61.1797	57.9539	72.2934	0.332041	0.317373	1.04622	0.295461	0.412511
ENSMUSG00000021178	Psmc1	516.87	403.678	403.678	659.392	727.275	651.34	685.534	578.252	-0.610017	0.161729	-3.77184	0.00016205	0.00104604
ENSMUSG00000021179	Nrde2	11.5651	59.4158	59.4158	87.2604	61.3705	60.4336	77.7802	59.6059	-0.643379	0.484178	-1.32881	0.183911	0.28671
ENSMUSG00000021180	Rps6ka5	48.0396	10.4851	10.4851	91.3765	54.3164	46.2578	57.9539	45.5592	-1.1512	0.525763	-2.18957	0.0285552	0.0664549
ENSMUSG00000021182	Ccdc88c	11.5651	5.24257	5.24257	32.1052	15.519	15.668	13.7259	14.1526	-1.04459	0.568031	-1.83897	0.0659192	0.129128
ENSMUSG00000021185	9030617O03Rik	219.737	190.48	190.48	168.758	204.568	139.52	167.761	183.043	0.233206	0.218962	1.06505	0.286851	0.403865
ENSMUSG00000021186	Fbln5	24.9094	12.2327	12.2327	147.355	10.5811	23.1289	23.6391	36.297	-1.123	0.640644	-1.75292	0.0796155	0.149845
ENSMUSG00000021188	Trip11	327.381	721.727	721.727	368.799	305.442	334.25	273.756	436.155	0.835891	0.296022	2.82375	0.00474653	0.0160559
ENSMUSG00000021189	Atxn3	197.496	155.53	155.53	250.256	229.258	269.34	265.368	217.54	-0.557591	0.196112	-2.84323	0.0044659	0.0152562
ENSMUSG00000021190	Lgmn	6430.19	4585.5	4585.5	7893.77	8639.83	10054.4	10032.1	7460.18	-0.800683	0.18586	-4.30798	1.64754e-05	0.000158046
ENSMUSG00000021192	Golga5	196.606	235.916	235.916	216.505	253.241	184.285	202.839	217.901	0.0493107	0.20641	0.238897	0.811186	0.86721
ENSMUSG00000021193	Pitrm1	156.573	200.965	200.965	138.3	186.933	164.887	198.263	178.127	0.102053	0.230854	0.442067	0.658441	0.750419
ENSMUSG00000021196	Pfkp	1026.62	789.881	789.881	865.195	897.279	749.078	823.555	848.785	0.06212	0.166146	0.373888	0.708488	0.790527
ENSMUSG00000021213	Akr1c13	55.1566	97.8614	97.8614	101.255	67.7191	75.3555	112.858	86.8666	-0.102569	0.338955	-0.302603	0.762193	0.831455
ENSMUSG00000021215	Net1	60.4943	6.9901	6.9901	13.1714	34.565	59.6875	56.4288	34.0467	-0.49264	0.631097	-0.78061	0.435032	0.550609
ENSMUSG00000021218	Gdi2	2528.31	1843.64	1843.64	3628.72	3522.81	3456.65	3452.83	2896.66	-0.750599	0.160148	-4.68691	2.77357e-06	3.5144e-05
ENSMUSG00000021222	Dcaf4	30.2471	17.4752	17.4752	21.4035	33.1542	23.1289	35.0774	25.4231	-0.304303	0.444516	-0.684571	0.493614	0.606583
ENSMUSG00000021224	Numb	148.567	281.351	281.351	343.279	246.187	220.844	226.478	249.722	-0.129775	0.298021	-0.435456	0.663232	0.753871
ENSMUSG00000021226	Acot2	19.5717	0	0	46.923	27.5109	32.082	30.502	22.37	-1.38501	0.679675	-2.03775	0.0415753	0.0899816
ENSMUSG00000021235	Coq6	56.0462	12.2327	12.2327	51.0391	55.7272	39.543	41.1778	38.2855	-0.630717	0.522769	-1.20649	0.227628	0.33919
ENSMUSG00000021236	Entpd5	32.916	59.4158	59.4158	180.283	86.0597	149.219	87.6934	93.5718	-1.21889	0.388681	-3.13597	0.00171285	0.00711759
ENSMUSG00000021238	Aldh6a1	48.9292	0	0	136.653	102.99	81.3242	84.6432	64.9342	-0.953696	0.687492	-1.38721	0.165377	0.26409
ENSMUSG00000021240	Abcd4	109.423	169.51	169.51	281.538	123.446	82.0703	131.159	152.38	-0.0467745	0.407772	-0.114707	0.908677	0.938148
ENSMUSG00000021241	Isca2	235.75	225.431	225.431	104.548	132.617	147.727	180.725	178.89	0.673289	0.244455	2.75424	0.00588279	0.0190674
ENSMUSG00000021242	Npc2	2508.73	3197.97	3197.97	3552.16	3649.78	2796.36	3627.46	3218.63	-0.196576	0.169382	-1.16055	0.245825	0.358759
ENSMUSG00000021243	Fcf1	194.827	304.069	304.069	152.294	179.879	240.242	227.24	228.946	0.398158	0.268979	1.48026	0.138804	0.230607
ENSMUSG00000021244	Ylpm1	80.066	104.851	104.851	64.2105	94.5246	133.551	77.0177	94.1532	0.0534663	0.331111	0.161476	0.871719	0.911873
ENSMUSG00000021245	Mlh3	44.4811	0	0	47.7463	31.0379	38.7969	48.0407	30.0147	-0.788572	0.6956	-1.13366	0.256938	0.37128
ENSMUSG00000021248	Tmed10	1263.26	2069.07	2069.07	1866.22	2492.21	2247.23	2634.61	2091.67	-0.351316	0.227635	-1.54333	0.122751	0.210104
ENSMUSG00000021250	Fos	7327.81	5850.71	5850.71	7208.04	8978.43	7449	8060.17	7246.41	-0.316632	0.153901	-2.05737	0.0396503	0.0866925
ENSMUSG00000021252	0610007P14Rik	96.9688	19.2228	19.2228	86.4372	90.9976	101.469	101.419	73.6767	-0.882724	0.50245	-1.75684	0.0789449	0.148949
ENSMUSG00000021253	Tgfb3	39.1434	33.203	33.203	5.76248	26.8055	8.20703	47.2782	27.6575	0.520319	0.592628	0.877986	0.379951	0.497668
ENSMUSG00000021254	Gpatch2l	146.788	110.094	110.094	90.5532	78.3003	94.7539	134.209	109.256	0.294022	0.290316	1.01277	0.311172	0.428518
ENSMUSG00000021257	Angel1	11.5651	1.74752	1.74752	10.7017	6.34867	13.4297	38.1276	11.9525	-1.0723	0.668441	-1.60418	0.108674	0.191118
ENSMUSG00000021262	Evl	128.106	110.094	110.094	73.2658	121.33	114.152	153.273	115.759	0.010203	0.304971	0.0334557	0.973311	0.981663
ENSMUSG00000021264	Yy1	64.0528	162.52	162.52	112.78	111.454	124.598	117.433	122.194	0.130354	0.346546	0.376152	0.706804	0.789154
ENSMUSG00000021266	Wars	212.62	54.1732	54.1732	276.599	204.568	245.465	285.957	190.508	-1.08798	0.439897	-2.47326	0.0133886	0.0367004
ENSMUSG00000021270	Hsp90aa1	591.598	763.668	763.668	583.657	918.441	1147.49	896.76	809.326	-0.318969	0.25031	-1.27429	0.202559	0.30929
ENSMUSG00000021271	Zfp839	88.0726	94.3663	94.3663	72.4426	43.7353	51.4805	50.3284	70.6846	0.724315	0.295267	2.45308	0.0141638	0.0382758
ENSMUSG00000021273	Fdft1	35.5849	17.4752	17.4752	67.5033	71.9516	61.9258	79.3053	50.1745	-1.40135	0.377719	-3.71002	0.000207244	0.00128058
ENSMUSG00000021275	Tecpr2	95.1895	27.9604	27.9604	32.9285	70.5408	39.543	56.4288	50.0788	0.0335321	0.49475	0.0677759	0.945964	0.963622
ENSMUSG00000021276	Cinp	83.6244	103.104	103.104	70.7962	97.3463	78.3398	100.657	90.9959	0.139048	0.268677	0.517529	0.604787	0.704423
ENSMUSG00000021277	Traf3	441.252	283.099	283.099	174.521	285.69	280.531	248.592	285.255	0.429161	0.270668	1.58556	0.112839	0.196535
ENSMUSG00000021279	Cdc42bpb	104.086	80.3861	80.3861	133.36	56.4326	79.832	91.5061	89.427	-0.0216906	0.349901	-0.0619905	0.95057	0.966657
ENSMUSG00000021281	Tnfaip2	2128.86	2224.6	2224.6	884.129	936.076	1072.14	811.355	1468.82	1.22994	0.144366	8.51959	1.6012e-17	4.62878e-15
ENSMUSG00000021282	Eif5	1668.93	1831.41	1831.41	1487.54	1921.53	2257.68	1981.87	1854.34	-0.10448	0.177028	-0.590185	0.555067	0.661577
ENSMUSG00000021285	Ppp1r13b	56.9358	31.4554	31.4554	117.719	88.8814	84.3086	90.7436	71.6428	-1.14201	0.339799	-3.36085	0.00077703	0.0037675
ENSMUSG00000021286	Zfyve21	75.6179	55.9208	55.9208	88.9068	82.5327	80.5781	58.7164	71.1705	-0.283165	0.302598	-0.935779	0.349387	0.467029
ENSMUSG00000021287	Xrcc3	41.8122	75.1435	75.1435	19.7571	23.9839	25.3672	35.0774	42.3264	1.17185	0.390835	2.99833	0.00271466	0.0102456
ENSMUSG00000021288	Klc1	196.606	276.109	276.109	438.772	268.055	182.793	254.692	270.448	-0.188982	0.318277	-0.593768	0.552668	0.659453
ENSMUSG00000021290	2010107E04Rik	604.943	1920.53	1920.53	351.511	394.323	383.492	334.76	844.298	1.8821	0.349526	5.38472	7.25561e-08	1.58057e-06
ENSMUSG00000021298	Gpr132	128.995	260.381	260.381	30.4588	129.09	130.566	142.597	154.638	0.875869	0.458535	1.91014	0.0561146	0.113782
ENSMUSG00000021302	Ggps1	117.43	40.1931	40.1931	149.824	138.965	163.395	160.898	115.843	-1.08459	0.392854	-2.76079	0.00576619	0.0188436
ENSMUSG00000021306	Gpr137b	2659.08	1516.85	1516.85	1658.77	1712.02	1874.19	1782.08	1817.12	0.10993	0.231308	0.475254	0.634606	0.730101
ENSMUSG00000021311	Mtr	185.041	195.723	195.723	101.255	140.376	138.027	89.2185	149.338	0.686661	0.251868	2.72628	0.00640534	0.0204634
ENSMUSG00000021319	Sfrp4	9.78584	5.24257	5.24257	10.7017	5.64326	9.69922	6.86296	7.59688	-0.175891	0.602304	-0.29203	0.770264	0.8371
ENSMUSG00000021322	Aoah	250.873	235.916	235.916	103.725	411.958	251.434	474.307	280.59	-0.329482	0.416849	-0.790411	0.429288	0.545004
ENSMUSG00000021326	Trim27	225.964	293.584	293.584	187.692	207.39	161.902	165.474	219.37	0.565311	0.208837	2.70695	0.0067905	0.021362
ENSMUSG00000021327	Zkscan3	222.405	179.995	179.995	114.426	90.2922	105.199	151.748	149.152	0.729024	0.260579	2.79771	0.0051466	0.0171971
ENSMUSG00000021338	Lrrc16a	330.939	216.693	216.693	44.4534	183.406	112.66	219.615	189.209	0.767975	0.443062	1.73334	0.083036	0.154838
ENSMUSG00000021339	Mrs2	98.748	80.3861	80.3861	60.9176	62.0759	52.2266	62.5292	71.0385	0.531923	0.26538	2.00438	0.0450295	0.0957146
ENSMUSG00000021356	Irf4	36.4745	19.2228	19.2228	146.532	9.1703	23.1289	26.6893	40.0629	-0.726055	0.635356	-1.14275	0.253141	0.367132
ENSMUSG00000021357	Exoc2	360.297	80.3861	80.3861	448.65	289.217	299.184	323.322	268.777	-0.839322	0.46125	-1.81967	0.0688094	0.13384
ENSMUSG00000021360	Gcnt2	290.017	269.119	269.119	65.8569	374.572	396.922	378.988	292.085	-0.122558	0.456024	-0.268753	0.78812	0.850028
ENSMUSG00000021361	Tmem14c	569.358	616.876	616.876	508.745	653.913	703.566	715.273	626.372	-0.102637	0.177743	-0.577448	0.563637	0.668811
ENSMUSG00000021365	Nedd9	301.582	160.772	160.772	591.066	340.712	384.984	375.938	330.832	-0.963458	0.311294	-3.09501	0.00196808	0.0079895
ENSMUSG00000021366	Hivep1	166.359	457.851	457.851	99.6086	110.044	140.266	122.771	222.107	1.49379	0.355176	4.20579	2.60176e-05	0.00023229
ENSMUSG00000021368	Tbc1d7	46.2603	50.6782	50.6782	74.9122	64.8975	52.2266	75.4926	59.3065	-0.425505	0.303526	-1.40187	0.160953	0.259075
ENSMUSG00000021371	Mcur1	297.134	508.53	508.53	599.298	409.136	313.359	411.015	435.286	0.0118947	0.290617	0.0409291	0.967352	0.977411
ENSMUSG00000021374	Nup153	277.562	347.757	347.757	226.383	313.906	407.367	341.623	323.194	0.00503127	0.246225	0.0204336	0.983697	0.988596
ENSMUSG00000021375	Kif13a	80.9556	214.945	214.945	180.283	167.887	155.187	115.145	161.336	0.11967	0.362433	0.330186	0.741259	0.815858
ENSMUSG00000021377	Dek	281.12	810.851	810.851	451.12	596.07	576.73	615.379	591.732	0.165492	0.341402	0.484742	0.627859	0.724365
ENSMUSG00000021384	Susd3	419.901	899.975	899.975	364.683	299.798	316.344	359.924	508.657	1.0904	0.283869	3.84123	0.000122421	0.000828222
ENSMUSG00000021385	Ippk	34.6953	10.4851	10.4851	40.3374	11.9919	27.6055	31.2646	23.8378	-0.429929	0.55937	-0.768595	0.442134	0.557804
ENSMUSG00000021388	Aspn	37.3641	17.4752	17.4752	18.1106	47.9677	9.69922	50.3284	28.3458	-0.290136	0.57096	-0.508154	0.611345	0.710524
ENSMUSG00000021390	Ogn	31.1368	50.6782	50.6782	5.76248	33.8596	29.0977	21.3514	31.7949	0.797111	0.525881	1.51576	0.129579	0.219162
ENSMUSG00000021392	Nol8	46.2603	110.094	110.094	53.5087	81.1219	61.1797	67.8671	75.7322	0.380265	0.37428	1.01599	0.309634	0.427014
ENSMUSG00000021395	Spin1	153.015	176.5	176.5	234.615	224.32	238.75	183.012	198.102	-0.382297	0.202828	-1.88483	0.0594521	0.119226
ENSMUSG00000021400	Wrnip1	53.3773	0	0	62.5641	50.0839	52.9727	39.6527	36.9501	-0.814516	0.695777	-1.17066	0.241736	0.353855
ENSMUSG00000021408	Ripk1	504.416	480.569	480.569	528.502	495.196	567.777	531.498	512.647	-0.116595	0.134295	-0.868197	0.385286	0.502993
ENSMUSG00000021411	Pxdc1	69.3905	92.6188	92.6188	82.3211	37.3866	38.0508	30.502	63.2698	0.768945	0.407361	1.88762	0.0590764	0.118619
ENSMUSG00000021413	Prpf4b	339.836	770.658	770.658	187.692	241.249	259.641	165.474	390.744	1.46504	0.320277	4.57427	4.77886e-06	5.5802e-05
ENSMUSG00000021417	Eci2	149.456	179.995	179.995	208.272	180.584	195.477	189.113	183.27	-0.19228	0.191544	-1.00384	0.315455	0.432855
ENSMUSG00000021418	Rpp40	36.4745	5.24257	5.24257	15.641	11.9919	17.9062	32.7897	17.8984	-0.195783	0.625751	-0.312877	0.754374	0.825282
ENSMUSG00000021420	Fars2	137.891	3.49505	3.49505	96.3157	126.973	76.1016	76.2551	74.361	-0.614338	0.665215	-0.923519	0.355737	0.473431
ENSMUSG00000021423	Ly86	806.887	891.237	891.237	1718.87	1149.11	1180.32	1339.8	1139.64	-0.630748	0.190595	-3.30937	0.000935071	0.00437703
ENSMUSG00000021427	Ssr1	628.073	508.53	508.53	968.92	852.133	1001.26	847.957	759.343	-0.727785	0.160651	-4.53021	5.89241e-06	6.69057e-05
ENSMUSG00000021428	Riok1	143.229	166.015	166.015	117.719	96.6409	161.156	100.657	135.919	0.392931	0.268254	1.46477	0.142983	0.236192
ENSMUSG00000021431	Snrnp48	84.5141	244.653	244.653	69.1498	53.611	60.4336	40.4152	113.919	1.61113	0.397932	4.04876	5.14898e-05	0.000405847
ENSMUSG00000021432	Slc35b3	127.216	41.9406	41.9406	124.305	112.16	103.707	89.981	91.6071	-0.528632	0.416534	-1.26912	0.204398	0.311563
ENSMUSG00000021451	Sema4d	851.368	538.237	538.237	245.317	1370.61	1122.12	1411.48	868.196	-0.61123	0.444716	-1.37443	0.169309	0.268764
ENSMUSG00000021453	Gadd45g	393.213	996.089	996.089	270.837	362.58	343.949	417.878	540.091	1.11732	0.327228	3.41449	0.000639008	0.00322094
ENSMUSG00000021457	Syk	2862.8	2104.02	2104.02	994.439	1319.82	1536.95	1367.25	1755.62	0.834861	0.208264	4.00867	6.10609e-05	0.000468849
ENSMUSG00000021458	2010111I01Rik	913.642	1232	1232	852.024	433.12	499.137	521.585	811.931	0.928582	0.267347	3.47332	0.00051407	0.00271263
ENSMUSG00000021460	Auh	244.646	108.346	108.346	156.41	170.709	172.348	163.949	160.679	-0.0882508	0.329108	-0.268151	0.788583	0.850329
ENSMUSG00000021461	Fancc	56.9358	183.49	183.49	74.089	50.7894	31.3359	30.502	87.2332	1.39327	0.463047	3.0089	0.00262191	0.00998361
ENSMUSG00000021468	Sptlc1	150.346	76.8911	76.8911	270.013	199.63	208.16	204.364	169.471	-1.04355	0.307564	-3.39296	0.000691419	0.00342698
ENSMUSG00000021470	Ercc6l2	62.2735	62.9109	62.9109	127.598	50.0839	73.8633	74.73	73.4815	-0.349189	0.370434	-0.94265	0.34586	0.463459
ENSMUSG00000021474	Sfxn1	99.6376	69.901	69.901	105.371	130.5	148.473	117.433	105.888	-0.609612	0.273616	-2.22799	0.0258815	0.0615311
ENSMUSG00000021476	Habp4	100.527	40.1931	40.1931	149.001	80.4165	60.4336	72.4424	77.601	-0.499888	0.447289	-1.1176	0.26374	0.379264
ENSMUSG00000021477	Ctsl	9851.67	6757.68	6757.68	7841.09	12047.7	12192.7	12429.6	9696.86	-0.500155	0.229423	-2.18006	0.0292532	0.0676816
ENSMUSG00000021481	Zfp346	62.2735	66.4059	66.4059	31.282	59.9597	44.0195	30.502	51.5498	0.598703	0.361419	1.65654	0.0976133	0.175533
ENSMUSG00000021482	Aaed1	79.1763	50.6782	50.6782	138.3	122.741	116.391	107.52	95.0691	-0.940257	0.285345	-3.29516	0.000983645	0.00456248
ENSMUSG00000021483	Cdk20	379.869	248.148	248.148	81.4979	152.368	138.773	120.483	195.613	1.19093	0.294242	4.04744	5.17798e-05	0.000407233
ENSMUSG00000021484	Lman2	778.419	639.594	639.594	802.631	872.589	965.445	811.355	787.09	-0.323555	0.156519	-2.0672	0.0387151	0.0849952
ENSMUSG00000021486	Prelid1	1136.05	1373.55	1373.55	1022.43	1190.73	1349.68	1155.27	1228.75	0.130351	0.160737	0.810956	0.417391	0.53351
ENSMUSG00000021488	Nsd1	394.992	375.718	375.718	214.858	359.758	452.879	366.787	362.959	0.127796	0.265186	0.48191	0.62987	0.725745
ENSMUSG00000021493	Pdlim7	110.313	131.064	131.064	176.99	146.019	174.586	218.09	155.447	-0.518464	0.236745	-2.18997	0.0285267	0.0664305
ENSMUSG00000021494	Ddx41	349.621	169.51	169.51	314.467	336.479	298.437	329.422	281.064	-0.4448	0.292675	-1.51977	0.128568	0.217865
ENSMUSG00000021495	Fam193b	157.463	351.252	351.252	74.9122	78.3003	70.8789	69.3922	164.779	1.85105	0.319372	5.79592	6.7946e-09	2.11881e-07
ENSMUSG00000021496	Pcbd2	120.099	162.52	162.52	74.089	96.6409	75.3555	96.844	112.581	0.753677	0.257223	2.93005	0.00338911	0.0122715
ENSMUSG00000021497	Txndc15	180.593	209.703	209.703	395.965	244.776	270.832	308.833	260.058	-0.594813	0.234767	-2.53363	0.0112888	0.0322848
ENSMUSG00000021500	Ddx46	410.116	896.48	896.48	232.969	375.982	398.414	415.59	518.004	0.984854	0.320942	3.06864	0.00215039	0.00854404
ENSMUSG00000021501	Caml	89.8518	64.6584	64.6584	129.244	135.438	131.312	117.433	104.657	-0.765194	0.250913	-3.04963	0.00229121	0.00896961
ENSMUSG00000021504	B4galt7	181.483	89.1237	89.1237	197.571	171.414	146.98	142.597	145.47	-0.414627	0.323265	-1.28262	0.199624	0.305711
ENSMUSG00000021508	Cxcl14	68.5009	141.549	141.549	42.807	88.176	102.215	98.3691	97.5952	0.44647	0.394103	1.13288	0.257265	0.371652
ENSMUSG00000021510	Zfp729a	90.7414	90.8713	90.8713	14.8178	31.0379	37.3047	28.9769	54.9459	1.56782	0.366103	4.28246	1.84839e-05	0.000173272
ENSMUSG00000021514	Zfp369	40.033	50.6782	50.6782	25.5196	26.1001	22.3828	12.2008	32.5132	1.01619	0.406832	2.4978	0.0124966	0.0350089
ENSMUSG00000021518	Ptdss1	267.776	141.549	141.549	442.064	341.417	232.035	315.696	268.87	-0.800032	0.320656	-2.49499	0.0125961	0.0352138
ENSMUSG00000021519	Mterf3	186.821	152.035	152.035	149.824	175.647	146.234	157.086	159.954	0.0653751	0.206937	0.315918	0.752065	0.823514
ENSMUSG00000021520	Uqcrb	1064.88	1840.14	1840.14	678.326	726.57	843.832	755.688	1107.08	1.043	0.228994	4.55469	5.24623e-06	6.04023e-05
ENSMUSG00000021532	Fastkd3	52.4877	17.4752	17.4752	25.5196	73.3624	49.2422	47.2782	40.4058	-0.601223	0.505777	-1.18871	0.234553	0.34623
ENSMUSG00000021537	Cetn3	310.478	330.282	330.282	293.063	360.463	349.172	308.833	326.082	-0.0211859	0.165811	-0.127771	0.89833	0.931601
[truncated: 8,697 more rows]

## Sheet: MAC2
Row.names	Gene_Symbol	Pad4Flox_LyzMCre_MAC2_1	Pad4Flox_LyzMCre_MAC2_2	Pad4Flox_LyzMCre_MAC2_3	Pad4Flox_LyzMCre_MAC2_4	Pad4_ko_MAC1_1	Pad4_ko_MAC1_2	Pad4_ko_MAC1_3	Pad4_ko_MAC1_4	baseMean	log2FoldChange	lfcSE	stat	pvalue	padj
ENSMUSG00000000001	Gnai3	605.947	536.669	664.473	664.473	1767.83	1169.04	1156.45	1142.29	963.397	-1.05682	0.17385	-6.0789	1.21008e-09	1.8682e-08
ENSMUSG00000000031	H19	53.3152	3.18183	24.9887	24.9887	0.794886	42.9648	19.7684	15.2545	23.1571	0.266613	0.547246	0.48719	0.626123	0.730364
ENSMUSG00000000056	Narf	184.552	170.758	138.574	138.574	183.619	210.827	171.626	135.496	166.753	-0.142309	0.210053	-0.677491	0.498094	0.61794
ENSMUSG00000000058	Cav2	333.22	316.062	441.846	441.846	1175.64	756.38	737.721	998.719	650.179	-1.21999	0.196241	-6.21682	5.07329e-10	8.45469e-09
ENSMUSG00000000078	Klf6	5339.72	6181.24	4559.31	4559.31	6493.42	4496.32	4541.34	4970.26	5142.62	0.0094371	0.158805	0.0594259	0.952613	0.96941
ENSMUSG00000000085	Scmh1	132.263	97.5762	204.453	204.453	80.2835	121.9	90.755	92.4241	128.014	0.682117	0.276186	2.46978	0.0135198	0.0361983
ENSMUSG00000000088	Cox5a	819.208	1108.34	557.703	557.703	500.778	584.521	826.679	827.331	722.783	0.144575	0.242764	0.595539	0.551483	0.666251
ENSMUSG00000000127	Fer	106.63	248.183	110.178	110.178	104.13	84.9304	79.9722	86.1429	116.293	0.641065	0.300162	2.13573	0.0327015	0.074378
ENSMUSG00000000131	Xpo6	514.696	504.851	542.937	542.937	697.115	690.434	647.865	539.29	585.016	-0.286359	0.133513	-2.1448	0.031969	0.0730848
ENSMUSG00000000134	Tfe3	693.097	693.64	793.96	793.96	802.04	872.285	775.461	829.125	781.696	-0.139114	0.116603	-1.19305	0.232849	0.35362
ENSMUSG00000000148	Brat1	131.237	153.789	67.0152	67.0152	100.951	124.898	93.4507	55.6339	99.2487	0.147067	0.332087	0.442858	0.657868	0.754155
ENSMUSG00000000149	Gna12	958.648	1055.31	655.386	655.386	996.787	1813.51	1535.65	1413.28	1135.49	-0.762129	0.213309	-3.57289	0.000353064	0.00157262
ENSMUSG00000000167	Pih1d2	0	1.06061	2.2717	2.2717	0.794886	1.99836	5.39139	0	1.72358	-0.161852	0.510988	-0.316743	0.751439	0.828061
ENSMUSG00000000168	Dlat	228.64	240.759	205.589	205.589	348.955	361.704	289.338	342.777	277.919	-0.595793	0.15587	-3.82237	0.000132175	0.000659273
ENSMUSG00000000171	Sdhd	900.206	988.49	733.76	733.76	961.812	822.326	1010.89	963.723	889.37	-0.160438	0.145928	-1.09943	0.271578	0.396888
ENSMUSG00000000184	Ccnd2	38.9611	8.48489	32.9397	32.9397	74.7193	90.9255	58.4067	61.0179	49.7993	-1.15365	0.379741	-3.03799	0.0023816	0.00819844
ENSMUSG00000000194	Gpr107	459.331	348.941	325.989	325.989	406.187	416.659	403.455	442.38	391.116	-0.187475	0.159512	-1.17531	0.239872	0.361853
ENSMUSG00000000204	Slfn4	1398.5	831.519	2011.59	2011.59	312.39	306.749	319.889	850.661	1005.36	1.53342	0.39986	3.8349	0.000125615	0.000629781
ENSMUSG00000000244	Tspan32	456.255	483.639	298.729	298.729	192.362	270.778	193.191	209.973	300.457	0.796773	0.217954	3.65569	0.00025649	0.00119117
ENSMUSG00000000253	Gmpr	24.607	19.091	13.6302	13.6302	26.2312	15.9869	29.6526	14.3571	19.6483	-0.232748	0.421726	-0.551894	0.581021	0.69155
ENSMUSG00000000275	Trim25	2674.99	2989.86	3840.31	3840.31	1312.36	1345.9	1453.88	1612.49	2383.76	1.19832	0.151144	7.92834	2.22099e-15	8.90251e-14
ENSMUSG00000000276	Dgke	80.998	129.395	149.932	149.932	68.3602	59.9509	77.2765	51.1473	95.874	0.927444	0.26967	3.43918	0.000583485	0.00244428
ENSMUSG00000000278	Scpep1	1548.19	1406.37	1373.24	1373.24	2427.58	2248.16	1904.06	1944.5	1778.17	-0.57331	0.122264	-4.68912	2.74382e-06	2.13034e-05
ENSMUSG00000000282	Mnt	55.3657	74.2428	53.385	53.385	58.8216	71.9411	82.6679	94.2188	68.0035	-0.354584	0.27087	-1.30905	0.190516	0.30237
ENSMUSG00000000290	Itgb2	2651.4	1642.89	2303.51	2303.51	6131.75	4426.37	3844.96	4492.89	3474.66	-1.05684	0.181221	-5.83178	5.48394e-09	7.45523e-08
ENSMUSG00000000295	Hddc2	78.9475	62.5761	46.5699	46.5699	46.8983	22.9812	21.5655	31.4063	44.6893	0.827761	0.349651	2.36739	0.0179141	0.0457211
ENSMUSG00000000317	Bcl6b	0	0	9.08681	9.08681	4.76932	3.99673	4.49282	9.87054	5.16288	-0.157049	0.555944	-0.28249	0.777568	0.847946
ENSMUSG00000000318	Clec10a	320.916	539.851	319.174	319.174	676.448	599.509	424.122	380.464	447.457	-0.4504	0.237723	-1.89464	0.0581401	0.119005
ENSMUSG00000000325	Arvcf	21.5311	0	7.95096	7.95096	17.4875	5.99509	12.5799	5.38393	9.85993	-0.0856332	0.553417	-0.154735	0.87703	0.918526
ENSMUSG00000000326	Comt	528.025	457.123	446.39	446.39	691.551	631.483	436.702	335.598	496.658	-0.151732	0.219053	-0.692674	0.488514	0.609611
ENSMUSG00000000339	Rtca	79.9727	12.7273	99.9549	99.9549	147.849	81.9329	107.828	103.192	91.6764	-0.499542	0.408188	-1.2238	0.221026	0.339764
ENSMUSG00000000340	Dbt	46.1381	11.6667	27.2604	27.2604	105.72	84.9304	79.9722	84.3482	58.4121	-1.47636	0.349415	-4.22525	2.38675e-05	0.000146917
ENSMUSG00000000346	Dazap2	5519.14	4875.63	4285.57	4285.57	5937.8	5417.56	5683.42	5696.2	5212.61	-0.258607	0.115826	-2.23272	0.0255672	0.0612657
ENSMUSG00000000355	Mcts1	367.054	383.941	245.344	245.344	275.825	375.692	356.73	324.83	321.845	-0.0971992	0.204206	-0.475986	0.634084	0.736167
ENSMUSG00000000374	Trappc10	119.959	222.728	127.215	127.215	228.132	215.823	232.728	230.612	188.052	-0.576851	0.228377	-2.52587	0.0115412	0.0315158
ENSMUSG00000000378	Ccm2	463.432	453.942	388.461	388.461	227.337	342.719	327.077	310.473	362.738	0.478446	0.173474	2.75802	0.00581519	0.017511
ENSMUSG00000000384	Tbrg4	64.5934	23.3334	38.619	38.619	23.0517	26.9779	28.7541	39.4822	35.4288	0.422503	0.373725	1.13052	0.258259	0.382175
ENSMUSG00000000386	Mx1	218.387	40.3032	312.359	312.359	186.003	91.9247	88.0593	141.777	173.897	0.673505	0.405717	1.66003	0.0969075	0.178361
ENSMUSG00000000399	Ndufa9	501.368	784.852	385.054	385.054	533.369	456.626	505.892	558.134	513.793	0.00182521	0.224255	0.00813898	0.993506	0.99574
ENSMUSG00000000420	Galnt1	750.513	637.427	632.669	632.669	913.324	1060.13	991.117	920.652	817.313	-0.542744	0.122581	-4.42762	9.52802e-06	6.50544e-05
ENSMUSG00000000439	Mkrn2	85.0992	182.425	72.6945	72.6945	97.771	57.9525	77.2765	76.2723	90.2732	0.376649	0.32816	1.14776	0.251068	0.374276
ENSMUSG00000000440	Pparg	160.971	225.91	232.85	232.85	268.671	180.852	113.219	241.38	207.088	0.0779634	0.26335	0.296045	0.767196	0.840146
ENSMUSG00000000441	Raf1	361.928	242.88	422.537	422.537	267.082	252.793	280.352	253.942	313.006	0.444372	0.196786	2.25815	0.0239362	0.0580974
ENSMUSG00000000489	Pdgfb	146.617	200.456	154.476	154.476	112.079	229.812	243.511	262.915	188.043	-0.347761	0.262878	-1.3229	0.18587	0.29675
ENSMUSG00000000530	Acvrl1	294.259	237.577	164.698	164.698	310.006	284.767	274.961	297.911	253.61	-0.421037	0.214366	-1.9641	0.0495183	0.104479
ENSMUSG00000000531	Grasp	210.185	232.274	221.491	221.491	65.9755	155.872	223.743	194.719	190.719	0.433439	0.296139	1.46363	0.143294	0.242234
ENSMUSG00000000532	Acvr1b	49.214	29.6971	71.5587	71.5587	36.5648	40.9664	53.0153	45.7634	49.7923	0.297982	0.335385	0.888476	0.374285	0.503092
ENSMUSG00000000538	Tom1l2	185.578	215.304	293.05	293.05	162.157	124.898	135.683	126.522	192.03	0.810855	0.214044	3.78826	0.000151707	0.000744206
ENSMUSG00000000552	Zfp385a	63.5681	21.2122	47.7058	47.7058	77.1039	101.917	151.857	190.232	87.6627	-1.3613	0.351306	-3.87496	0.000106643	0.000543839
ENSMUSG00000000555	Itga5	1037.6	963.035	1353.94	1353.94	1021.43	1390.86	1659.65	1663.63	1305.51	-0.276528	0.187088	-1.47806	0.139391	0.237022
ENSMUSG00000000561	Wdr77	67.6692	96.5156	77.2379	77.2379	77.1039	62.9484	87.1608	59.2232	75.6371	0.143957	0.255114	0.564285	0.57256	0.684985
ENSMUSG00000000563	Atp5f1	970.951	935.459	976.832	976.832	1112.84	1200.02	1266.98	1291.25	1091.39	-0.332528	0.104168	-3.19223	0.0014118	0.00523384
ENSMUSG00000000568	Hnrnpd	368.08	348.941	479.329	479.329	554.036	614.497	740.417	805.795	548.803	-0.678259	0.179219	-3.78452	0.000154005	0.000753406
ENSMUSG00000000579	Dynlt1c	173.274	155.91	137.438	137.438	50.8727	71.9411	62.0009	69.9911	107.358	1.19806	0.222718	5.37926	7.4793e-08	8.25811e-07
ENSMUSG00000000581	C1d	423.445	321.365	273.74	273.74	378.366	346.716	355.832	390.335	345.442	-0.181344	0.178994	-1.01313	0.310998	0.43943
ENSMUSG00000000594	Gm2a	4357.49	3148.95	3056.58	3056.58	3686.68	5100.82	4491.92	4712.73	3951.47	-0.39339	0.157286	-2.50111	0.0123805	0.0334624
ENSMUSG00000000600	Krit1	752.564	732.882	805.319	805.319	361.673	269.779	352.237	239.585	539.92	1.30869	0.164702	7.94581	1.92931e-15	7.78932e-14
ENSMUSG00000000605	Clcn4	914.56	1006.52	954.115	954.115	627.165	559.542	739.519	718.755	809.286	0.52609	0.13092	4.01839	5.85961e-05	0.000324493
ENSMUSG00000000628	Hk2	209.159	285.304	222.627	222.627	251.979	219.82	296.526	224.33	241.547	-0.0772545	0.183407	-0.421219	0.673595	0.76677
ENSMUSG00000000631	Myo18a	79.9727	193.031	207.861	207.861	389.494	389.681	392.673	375.978	279.569	-1.10485	0.256123	-4.31374	1.60518e-05	0.000103644
ENSMUSG00000000682	Cd52	4023.24	4332.6	2987.29	2987.29	1842.55	2989.55	3479.24	4590.7	3404.06	0.144738	0.23289	0.621487	0.534279	0.651054
ENSMUSG00000000686	Abhd15	15.3794	38.182	59.0643	59.0643	59.6165	85.9296	102.436	87.0402	63.3391	-0.849732	0.365577	-2.32436	0.0201063	0.0502964
ENSMUSG00000000693	Loxl3	65.6187	35.0002	48.8416	48.8416	20.667	43.964	51.2182	51.1473	45.6623	0.223394	0.354328	0.630472	0.528386	0.646154
ENSMUSG00000000708	Kat2b	93.3015	118.788	191.959	191.959	176.465	144.881	130.292	119.344	145.874	0.0557679	0.268596	0.207627	0.83552	0.890273
ENSMUSG00000000711	Rab5b	152.768	116.667	145.389	145.389	142.285	188.845	182.409	191.13	158.11	-0.319208	0.196116	-1.62764	0.1036	0.18774
ENSMUSG00000000732	Icosl	21.5311	33.9396	59.0643	59.0643	93.7966	51.9574	66.4938	74.4777	57.5406	-0.649291	0.350718	-1.85132	0.0641237	0.128789
ENSMUSG00000000738	Spg7	341.422	389.244	337.348	337.348	213.029	261.786	265.975	363.415	313.696	0.338547	0.188594	1.79511	0.0726368	0.142516
ENSMUSG00000000740	Rpl13	1855.78	2127.59	1695.83	1695.83	1815.52	2015.35	2184.41	2256.76	1955.88	-0.163177	0.127168	-1.28317	0.199434	0.312636
ENSMUSG00000000743	Chmp1a	919.687	704.246	831.443	831.443	861.657	753.383	584.067	686.451	771.547	0.183812	0.156839	1.17198	0.241206	0.363473
ENSMUSG00000000751	Rpa1	355.776	265.153	160.155	160.155	273.441	235.807	214.757	251.25	239.562	-0.047321	0.258548	-0.183026	0.854777	0.904106
ENSMUSG00000000753	Serpinf1	165.072	70.0003	105.634	105.634	84.2579	165.864	121.306	71.7857	111.194	0.0117602	0.319214	0.0368412	0.970612	0.98125
ENSMUSG00000000759	Tubgcp3	389.611	210.001	415.722	415.722	173.285	170.86	119.509	176.772	258.935	1.10298	0.241178	4.57331	4.80071e-06	3.49883e-05
ENSMUSG00000000776	Polr3d	77.9222	146.364	71.5587	71.5587	57.2318	44.9632	77.2765	64.6072	76.4353	0.54022	0.31128	1.73548	0.0826557	0.158244
ENSMUSG00000000787	Ddx3x	930.965	1149.7	1419.81	1419.81	3410.06	3418.2	3110.83	3118.19	2247.2	-1.38234	0.15102	-9.15335	5.51971e-20	4.21824e-18
ENSMUSG00000000804	Usp32	147.642	73.1822	82.9172	82.9172	85.8477	70.9419	101.538	69.0938	89.26	0.223721	0.286648	0.780472	0.435113	0.561052
ENSMUSG00000000811	Txnrd3	5.12646	26.5153	19.3095	19.3095	31.7954	32.973	22.4641	48.4554	25.7436	-0.772435	0.437489	-1.76561	0.0774613	0.150083
ENSMUSG00000000823	Zfp512b	39.9864	59.3942	94.2757	94.2757	43.7187	62.9484	37.7397	66.4018	62.3426	0.403873	0.337484	1.19672	0.231417	0.351944
ENSMUSG00000000826	Dnajc5	538.278	407.275	559.975	559.975	854.503	752.384	891.376	894.63	682.299	-0.704031	0.147127	-4.78518	1.70832e-06	1.39097e-05
ENSMUSG00000000827	Tpd52l2	308.613	211.062	231.714	231.714	440.367	424.652	373.803	368.799	323.84	-0.691805	0.171343	-4.03754	5.4014e-05	0.000302405
ENSMUSG00000000838	Fmr1	379.358	456.063	458.884	458.884	315.57	370.696	392.673	390.335	402.808	0.250692	0.146578	1.7103	0.0872109	0.164679
ENSMUSG00000000861	Bcl11a	22.5564	40.3032	12.4944	12.4944	33.3852	19.9836	39.5368	15.2545	24.5011	-0.238887	0.448731	-0.532362	0.594475	0.703261
ENSMUSG00000000876	Pxmp4	33.8346	62.5761	95.4115	95.4115	106.515	91.9247	101.538	122.036	88.6558	-0.511036	0.312096	-1.63743	0.10154	0.184758
ENSMUSG00000000881	Dlg3	36.9105	24.3941	11.3585	11.3585	35.7699	18.9844	26.0584	35.8929	25.0909	-0.384717	0.433366	-0.887741	0.37468	0.50326
ENSMUSG00000000902	Smarcb1	215.311	247.122	253.295	253.295	257.543	326.732	252.497	266.505	259.038	-0.182465	0.163092	-1.11878	0.263233	0.387924
ENSMUSG00000000916	Nsun5	35.8852	112.425	55.6567	55.6567	66.7704	73.9394	73.6823	59.2232	66.6549	-0.0675737	0.33588	-0.201184	0.840555	0.893147
ENSMUSG00000000957	Mmp14	1497.95	1208.04	1493.64	1493.64	1597.72	3197.38	3610.43	3801.05	2237.48	-1.05413	0.22438	-4.69797	2.62763e-06	2.05055e-05
ENSMUSG00000000958	Slc7a7	369.105	303.335	258.974	258.974	373.596	329.73	342.353	380.464	327.066	-0.253973	0.168214	-1.50982	0.131089	0.226176
ENSMUSG00000000959	Oxa1l	116.883	89.0913	106.77	106.77	106.515	115.905	99.7407	143.571	110.656	-0.144097	0.220568	-0.653298	0.513564	0.632184
ENSMUSG00000000976	Heatr6	103.554	107.122	179.465	179.465	114.464	120.901	94.3493	137.29	129.576	0.269092	0.257195	1.04625	0.295443	0.423316
ENSMUSG00000000982	Ccl3	727.957	1157.13	718.994	718.994	996.787	754.382	634.387	597.616	788.28	0.149673	0.212196	0.705353	0.480591	0.602512
ENSMUSG00000001016	Ilf2	279.905	239.698	299.865	299.865	230.517	214.824	262.381	202.795	253.731	0.290292	0.166382	1.74473	0.0810317	0.155676
ENSMUSG00000001017	Chtop	642.858	362.729	565.654	565.654	646.242	501.589	529.254	458.531	534.064	0.00034333	0.195734	0.00175406	0.9986	0.998894
ENSMUSG00000001018	Snapin	523.924	540.912	520.22	520.22	490.445	431.646	323.483	444.174	474.378	0.310414	0.156602	1.98219	0.0474583	0.100946
ENSMUSG00000001020	S100a4	1052.97	1425.46	1301.69	1301.69	2038.88	1373.87	1638.98	1607.1	1467.58	-0.382793	0.154957	-2.47032	0.0134992	0.0361612
ENSMUSG00000001025	S100a6	3764.87	4950.93	2952.08	2952.08	4322.59	2250.16	2446.79	2694.66	3291.77	0.306329	0.223174	1.3726	0.169876	0.27724
ENSMUSG00000001029	Icam2	16.4047	8.48489	28.3963	28.3963	43.7187	24.9795	26.0584	34.0982	26.3171	-0.554303	0.416997	-1.32928	0.183757	0.294402
ENSMUSG00000001034	Mapk7	450.103	444.396	422.537	422.537	213.029	216.822	265.975	224.33	332.466	0.903823	0.143508	6.29805	3.01416e-10	5.2076e-09
ENSMUSG00000001036	Epn2	0	29.6971	1.13585	1.13585	54.0523	2.99754	5.39139	9.87054	13.0351	-0.499293	0.554182	-0.900956	0.367612	0.496287
ENSMUSG00000001052	Sec24b	446.002	503.79	486.144	486.144	374.391	403.669	451.079	371.491	440.339	0.260429	0.133512	1.9506	0.0511047	0.107231
ENSMUSG00000001053	N4bp3	0	43.4851	42.0265	42.0265	74.7193	30.9746	49.421	24.2277	38.3601	-0.333445	0.524842	-0.635324	0.525217	0.642994
ENSMUSG00000001054	Rmnd5b	178.401	303.335	177.193	177.193	234.491	200.835	155.452	204.589	203.936	0.0687356	0.234744	0.292811	0.769666	0.842124
ENSMUSG00000001056	Nhp2	423.445	557.882	316.903	316.903	274.236	271.777	414.238	452.25	378.454	0.184557	0.23981	0.769595	0.44154	0.566431
ENSMUSG00000001062	Vps9d1	414.218	386.062	437.303	437.303	267.877	211.826	236.322	230.612	327.69	0.807049	0.145675	5.54006	3.0237e-08	3.64718e-07
ENSMUSG00000001065	Zfp276	227.615	293.789	321.446	321.446	135.926	134.889	88.0593	115.754	204.866	1.24704	0.208934	5.96859	2.39319e-09	3.47891e-08
ENSMUSG00000001082	Mfsd10	244.019	316.062	337.348	337.348	302.057	337.723	283.946	373.286	316.474	-0.0695991	0.17299	-0.402331	0.68744	0.778464
ENSMUSG00000001089	Luzp1	448.052	412.578	435.031	435.031	419.7	304.75	391.774	394.822	405.217	0.191007	0.148005	1.29055	0.19686	0.309828
ENSMUSG00000001098	Kctd10	167.123	169.698	193.095	193.095	292.518	300.754	318.99	299.705	241.872	-0.732239	0.151486	-4.83372	1.34007e-06	1.11924e-05
ENSMUSG00000001100	Poldip2	291.183	196.213	202.182	202.182	181.234	215.823	168.93	204.589	207.792	0.205703	0.197884	1.03952	0.298565	0.426538
ENSMUSG00000001105	Ift20	290.158	215.304	223.763	223.763	144.669	195.84	188.699	176.772	207.371	0.42261	0.187899	2.24913	0.0245039	0.0592068
ENSMUSG00000001119	Col6a1	54.3405	0	36.3473	36.3473	33.3852	127.895	134.785	106.781	66.2352	-0.868277	0.559064	-1.55309	0.120401	0.211523
ENSMUSG00000001123	Lgals9	1373.89	991.671	1133.58	1133.58	1676.41	1368.88	1230.13	1372	1285.02	-0.280767	0.148172	-1.89487	0.058109	0.118964
ENSMUSG00000001127	Araf	684.895	545.154	595.186	595.186	406.187	350.713	380.093	450.455	500.984	0.598021	0.143242	4.17491	2.98101e-05	0.000177644
ENSMUSG00000001128	Cfp	4837.33	4571.23	3253.08	3253.08	2666.05	3490.14	3987.83	3347.01	3675.72	0.232488	0.176222	1.31929	0.187071	0.298114
ENSMUSG00000001131	Timp1	317.84	176.061	216.948	216.948	300.467	230.811	301.019	231.509	248.95	-0.189714	0.216453	-0.876467	0.380776	0.509368
ENSMUSG00000001134	Uxt	147.642	165.455	76.1021	76.1021	61.2062	77.9361	90.755	70.8884	95.7609	0.581197	0.30521	1.90425	0.0568779	0.116908
ENSMUSG00000001138	Cnnm3	37.9358	43.4851	21.5812	21.5812	47.6932	56.9533	50.3196	38.5848	39.7668	-0.563977	0.343756	-1.64063	0.100874	0.183827
ENSMUSG00000001143	Lman2l	203.008	295.911	220.355	220.355	248.004	275.774	265.975	260.223	248.701	-0.15553	0.174035	-0.893671	0.371498	0.500208
ENSMUSG00000001150	Mcm3ap	51.2646	55.1518	124.944	124.944	164.541	136.888	98.8421	166.004	115.322	-0.60993	0.322619	-1.89056	0.0586832	0.119956
ENSMUSG00000001151	Pcnt	282.98	323.486	403.227	403.227	228.132	238.804	275.859	256.634	301.544	0.486335	0.174612	2.78523	0.00534898	0.0163091
ENSMUSG00000001156	Mxd1	6127.14	4698.51	6344.87	6344.87	1300.43	1648.65	1968.75	1914.88	3793.51	1.74531	0.161516	10.8058	3.22993e-27	5.08191e-25
ENSMUSG00000001157	Gmcl1	142.516	145.304	97.6832	97.6832	179.644	164.865	133.886	143.571	138.144	-0.347395	0.225986	-1.53724	0.124235	0.216735
ENSMUSG00000001158	Snrnp27	233.766	318.183	141.981	141.981	161.362	153.874	166.234	188.438	188.228	0.301178	0.266236	1.13124	0.257953	0.381932
ENSMUSG00000001173	Ocrl	753.589	469.851	776.922	776.922	528.599	410.664	416.934	422.638	569.515	0.623154	0.188687	3.30257	0.000958019	0.00373537
ENSMUSG00000001175	Calm1	13972.7	13151.6	10110.2	10110.2	8690.49	9776.99	11014.6	11831.2	11082.2	0.192907	0.153047	1.26044	0.20751	0.322513
ENSMUSG00000001211	Agpat3	132.263	73.1822	113.585	113.585	160.567	109.91	125.799	84.3482	114.155	-0.143958	0.270043	-0.533094	0.593968	0.702972
ENSMUSG00000001227	Sema6b	16.4047	28.6365	18.1736	18.1736	101.745	57.9525	94.3493	66.4018	50.2297	-1.78065	0.33451	-5.32316	1.0198e-07	1.09877e-06
ENSMUSG00000001228	Uhrf1	27.6829	89.0913	94.2757	94.2757	97.771	106.912	123.103	183.054	102.021	-0.665053	0.345113	-1.92706	0.0539726	0.111996
ENSMUSG00000001229	Dpp9	159.945	148.486	191.959	191.959	337.032	354.709	345.049	341.88	258.877	-0.974527	0.158689	-6.14112	8.19423e-10	1.30461e-08
ENSMUSG00000001247	Lsr	261.449	106.061	211.268	211.268	175.67	232.809	209.366	227.022	204.364	-0.0907837	0.255543	-0.355259	0.722396	0.805874
ENSMUSG00000001248	Gramd1a	1384.14	1342.73	1594.74	1594.74	541.317	601.507	602.038	547.366	1026.07	1.35241	0.119507	11.3165	1.08704e-29	2.42296e-27
ENSMUSG00000001249	Hpn	43.0622	53.0306	14.7661	14.7661	23.8466	12.9894	26.0584	43.9688	29.061	0.185246	0.457558	0.404859	0.685581	0.776687
ENSMUSG00000001270	Ckb	859.194	767.883	847.345	847.345	1554	1004.18	774.563	1098.32	969.104	-0.403282	0.193937	-2.07945	0.0375759	0.0832349
ENSMUSG00000001280	Sp1	108.681	97.5762	114.721	114.721	175.67	234.808	150.06	169.594	145.729	-0.716391	0.211234	-3.39146	0.000695224	0.00282821
ENSMUSG00000001281	Itgb7	206.084	124.092	240.801	240.801	667.704	312.744	356.73	231.509	297.558	-0.877006	0.301153	-2.91216	0.00358941	0.0115776
ENSMUSG00000001285	Myg1	181.477	150.607	81.7813	81.7813	108.899	96.9206	71.8852	90.6295	107.998	0.396505	0.299139	1.32549	0.18501	0.295877
ENSMUSG00000001288	Rarg	14.3541	24.3941	13.6302	13.6302	44.5136	43.964	74.5809	38.5848	33.4565	-1.39902	0.375799	-3.72278	0.000197045	0.000940734
ENSMUSG00000001289	Pfdn5	430.622	461.366	333.94	333.94	443.546	443.637	511.283	520.447	434.848	-0.291508	0.163517	-1.78273	0.07463	0.145785
ENSMUSG00000001305	Rrp15	64.5934	99.6975	64.7435	64.7435	90.617	89.9263	104.233	72.6831	81.4047	-0.266197	0.25911	-1.02735	0.304255	0.432187
ENSMUSG00000001313	Rnd2	9.22762	2.12122	7.95096	7.95096	42.129	18.9844	4.49282	13.4598	13.2896	-1.01958	0.528159	-1.93045	0.0535508	0.111251
ENSMUSG00000001323	Srr	36.9105	20.1516	62.4718	62.4718	73.1295	49.9591	37.7397	48.4554	48.9112	-0.17972	0.373953	-0.480595	0.630804	0.733983
ENSMUSG00000001348	Acp5	409.091	543.033	327.125	327.125	205.081	634.48	612.821	584.156	455.364	-0.316086	0.293444	-1.07716	0.28141	0.407637
ENSMUSG00000001366	Fbxo9	71.7704	131.516	121.536	121.536	136.72	132.891	113.219	112.165	117.669	-0.143375	0.241208	-0.594403	0.552242	0.667093
ENSMUSG00000001376	Vps50	488.039	456.063	499.775	499.775	330.673	329.73	338.759	419.947	420.345	0.446241	0.141725	3.14863	0.00164035	0.00595323
ENSMUSG00000001380	Hars	217.362	127.273	154.476	154.476	311.595	204.832	301.019	226.125	212.145	-0.646442	0.226836	-2.84982	0.00437435	0.0137006
ENSMUSG00000001383	Zmat2	197.881	201.516	213.54	213.54	263.902	260.786	240.815	244.969	229.619	-0.285388	0.148402	-1.92308	0.0544704	0.112898
ENSMUSG00000001403	Ube2c	41.0117	37.1214	42.0265	42.0265	73.1295	55.9542	79.9722	79.8616	56.388	-0.782703	0.271473	-2.88317	0.00393695	0.0125175
ENSMUSG00000001415	Smg5	422.42	409.396	252.159	252.159	209.055	204.832	273.164	207.281	278.808	0.555873	0.224038	2.48115	0.0130958	0.0351775
ENSMUSG00000001416	Cct3	795.626	948.186	717.858	717.858	840.195	779.361	1037.84	830.92	833.481	-0.13109	0.150665	-0.870078	0.384258	0.51236
ENSMUSG00000001418	Glmp	1119.62	964.096	1018.86	1018.86	907.76	876.282	545.429	620.947	883.981	0.469475	0.179534	2.61497	0.00892353	0.0252908
ENSMUSG00000001419	Mef2d	701.299	634.246	807.59	807.59	673.269	810.336	899.463	950.264	785.507	-0.172506	0.154205	-1.11868	0.263277	0.387936
ENSMUSG00000001424	Snd1	901.231	460.305	778.058	778.058	905.375	971.204	1225.64	975.389	874.408	-0.466886	0.200379	-2.33001	0.0198056	0.0496601
ENSMUSG00000001435	Col18a1	14.3541	0	0	0	19.8722	17.9853	62.0009	29.6116	17.978	-1.50577	0.559904	-2.68933	0.00715951	0.0208889
ENSMUSG00000001436	Slc19a1	89.2004	53.0306	39.7548	39.7548	75.5142	83.9312	144.669	73.5804	74.9294	-0.687771	0.337505	-2.03781	0.0415688	0.0903633
ENSMUSG00000001440	Kpnb1	92.2762	235.456	188.551	188.551	223.363	332.727	352.237	351.75	245.614	-0.787865	0.266264	-2.95896	0.00308675	0.0102245
ENSMUSG00000001441	Npepps	170.198	309.698	328.261	328.261	231.312	285.766	278.555	226.125	269.772	0.146649	0.225396	0.650629	0.515286	0.634067
ENSMUSG00000001445	Mrpl10	142.516	111.364	116.993	116.993	186.798	128.894	134.785	172.286	138.829	-0.34006	0.213485	-1.5929	0.111182	0.19852
ENSMUSG00000001467	Cyp51	109.706	205.759	96.5474	96.5474	215.414	234.808	275.859	288.938	190.447	-0.937884	0.261869	-3.5815	0.000341622	0.0015261
ENSMUSG00000001472	Tcf25	1746.07	1520.92	1975.25	1975.25	1283.74	1228.99	1532.95	1463.53	1590.84	0.383637	0.135504	2.83119	0.00463755	0.0144236
ENSMUSG00000001473	Tubb6	2455.57	2156.22	1740.12	1740.12	1716.95	1692.61	1606.63	1592.75	1837.62	0.287684	0.140047	2.0542	0.0399565	0.0875476
ENSMUSG00000001482	Def8	138.414	142.122	130.623	130.623	253.569	162.867	128.495	189.335	159.506	-0.420063	0.233537	-1.7987	0.0720664	0.141657
ENSMUSG00000001506	Col1a1	88.1751	27.5759	214.676	214.676	79.4886	1230.99	834.766	681.067	421.427	-1.44164	0.544835	-2.646	0.00814489	0.0233389
ENSMUSG00000001517	Foxm1	0	0	19.3095	19.3095	14.3079	35.9705	42.2325	62.8125	24.2428	-1.11163	0.555609	-2.00073	0.0454212	0.0973286
ENSMUSG00000001518	Itfg2	29.7335	29.6971	18.1736	18.1736	27.0261	47.9607	34.1454	37.6875	30.3247	-0.535576	0.36392	-1.47169	0.141106	0.239596
ENSMUSG00000001524	Gtf2h4	97.4027	84.8489	61.336	61.336	101.745	109.91	77.2765	82.5536	84.5511	-0.265633	0.261846	-1.01446	0.310362	0.438706
ENSMUSG00000001525	Tubb5	569.037	535.609	617.903	617.903	1479.28	1307.93	1242.71	1389.95	970.041	-1.1985	0.118146	-10.1442	3.51586e-24	4.17958e-22
ENSMUSG00000001542	Ell2	913.535	1089.25	747.39	747.39	318.749	606.503	977.638	868.607	783.633	0.314859	0.272381	1.15595	0.247701	0.370547
ENSMUSG00000001552	Jup	94.3268	141.061	79.5096	79.5096	277.415	182.85	149.162	152.545	144.547	-0.888209	0.276345	-3.21413	0.00130842	0.00490154
ENSMUSG00000001569	Nom1	274.778	145.304	273.74	273.74	227.337	197.838	214.757	209.076	227.071	0.179964	0.222329	0.809449	0.418257	0.544992
ENSMUSG00000001576	Ergic1	286.056	148.486	193.095	193.095	254.364	299.754	376.499	267.402	252.344	-0.520994	0.227987	-2.2852	0.0223013	0.0548384
ENSMUSG00000001627	Ifrd1	4718.39	4486.39	5218.1	5218.1	2522.97	4177.58	4526.97	4916.43	4473.12	0.274925	0.186003	1.47807	0.139389	0.237022
ENSMUSG00000001630	Stk38l	652.085	483.639	558.839	558.839	139.9	304.75	306.41	380.464	423.116	0.941761	0.25199	3.7373	0.000186007	0.000894018
ENSMUSG00000001632	Brpf1	947.369	680.912	981.376	981.376	802.04	819.329	863.52	996.027	883.994	0.043887	0.15568	0.281904	0.778017	0.848176
ENSMUSG00000001642	Akr1b3	570.062	420.002	402.091	402.091	521.445	423.653	422.325	436.996	449.833	-0.007896	0.167581	-0.0471176	0.962419	0.975827
ENSMUSG00000001663	Gstt1	43.0622	82.7277	36.3473	36.3473	8.74375	20.9828	60.2038	113.063	50.1847	-0.0234727	0.485025	-0.0483948	0.961402	0.975349
ENSMUSG00000001665	Gstt3	80.998	116.667	65.8794	65.8794	30.2057	32.973	75.4794	92.4241	70.0633	0.4489	0.369291	1.21557	0.224147	0.343624
ENSMUSG00000001666	Ddt	126.111	158.031	145.389	145.389	85.0528	91.9247	174.322	210.871	142.136	0.0299642	0.293258	0.102177	0.918616	0.94606
ENSMUSG00000001674	Ddx18	94.3268	151.667	103.362	103.362	119.233	96.9206	81.7694	94.2188	105.608	0.1959	0.244118	0.802479	0.422276	0.548759
ENSMUSG00000001687	Ubl3	4012.99	3078.95	4107.24	4107.24	2589.74	2690.8	2462.07	2722.47	3221.44	0.541654	0.124616	4.34659	1.38268e-05	9.12038e-05
ENSMUSG00000001700	Gramd3	204.033	134.698	202.182	202.182	214.619	116.904	84.4651	79.8616	154.868	0.534067	0.305918	1.74578	0.080849	0.155409
ENSMUSG00000001707	Eef1e1	152.768	164.395	98.8191	98.8191	160.567	156.871	182.409	207.281	152.741	-0.435023	0.235098	-1.85039	0.0642567	0.128983
ENSMUSG00000001729	Akt1	1421.05	1191.07	1173.33	1173.33	1012.68	1299.94	1186.11	1319.96	1222.18	0.0413622	0.134288	0.308011	0.758074	0.833227
ENSMUSG00000001741	Il16	58.4416	80.6065	71.5587	71.5587	168.516	94.9222	69.1895	61.9152	84.5885	-0.441054	0.325393	-1.35545	0.175273	0.284043
ENSMUSG00000001750	Tcirg1	2041.36	2175.31	2597.69	2597.69	1360.05	1731.58	1723.45	1663.63	1986.35	0.530808	0.136329	3.89359	9.87712e-05	0.000508299
ENSMUSG00000001751	Naglu	335.27	327.729	421.401	421.401	776.604	670.451	592.154	524.036	508.631	-0.749707	0.172727	-4.34043	1.42207e-05	9.35141e-05
ENSMUSG00000001755	Coasy	134.313	91.2126	123.808	123.808	182.824	118.903	111.422	174.978	132.658	-0.299852	0.244701	-1.22538	0.220432	0.338996
ENSMUSG00000001763	Tspan33	14.3541	127.273	28.3963	28.3963	14.3079	58.9517	64.6966	81.6563	52.2541	-0.10661	0.492377	-0.216521	0.828582	0.885968
ENSMUSG00000001767	Crnkl1	143.541	106.061	196.502	196.502	242.44	225.815	242.612	308.679	207.769	-0.638169	0.229684	-2.77846	0.00546173	0.0166103
ENSMUSG00000001768	Rin2	522.899	672.428	619.039	619.039	1754.31	1106.09	1003.7	1002.31	912.477	-0.968785	0.19595	-4.94404	7.65204e-07	6.7382e-06
ENSMUSG00000001774	Chordc1	257.348	220.607	246.48	246.48	260.723	292.76	300.121	270.094	261.827	-0.206367	0.148632	-1.38844	0.165003	0.271136
ENSMUSG00000001783	Rtcb	392.687	327.729	216.948	216.948	469.778	418.657	325.28	386.746	344.346	-0.45094	0.223649	-2.01628	0.0437708	0.0943021
ENSMUSG00000001785	Pwp1	242.994	112.425	254.431	254.431	254.364	269.779	332.469	258.429	247.415	-0.348587	0.250048	-1.39408	0.163293	0.268822
ENSMUSG00000001786	Fbxo7	140.465	46.6669	116.993	116.993	141.49	107.912	85.3636	125.625	110.188	-0.11854	0.313266	-0.3784	0.705133	0.792044
ENSMUSG00000001794	Capns1	211.21	315.002	271.469	271.469	348.955	410.664	522.066	553.647	363.06	-0.754191	0.198872	-3.79234	0.000149233	0.000734425
ENSMUSG00000001829	Clpb	71.7704	43.4851	114.721	114.721	215.414	146.88	174.322	139.982	127.662	-0.900091	0.299884	-3.00147	0.00268682	0.0090568
ENSMUSG00000001833	2007-09-01	1366.71	1521.98	1222.18	1222.18	1580.23	1606.68	1812.4	1704.91	1504.66	-0.326012	0.119817	-2.72092	0.00651004	0.0192992
ENSMUSG00000001844	Zdhhc4	150.718	201.516	224.899	224.899	220.183	192.842	186.003	171.388	196.556	0.0543046	0.195342	0.277998	0.781014	0.850675
ENSMUSG00000001847	Rac1	2209.5	2245.31	2251.26	2251.26	3285.26	3338.27	3205.18	3448.41	2779.31	-0.56469	0.0827124	-6.82715	8.66181e-12	2.00157e-10
ENSMUSG00000001855	Nup214	301.436	320.305	379.374	379.374	282.979	398.673	308.208	300.603	333.869	0.0956188	0.172009	0.555894	0.578283	0.689342
ENSMUSG00000001865	Cpa3	97.4027	26.5153	0	0	20.667	6.99427	33.2469	13.4598	24.7858	0.218701	0.512644	0.426613	0.669661	0.763614
ENSMUSG00000001891	Ugp2	323.992	337.274	271.469	271.469	687.576	591.515	576.878	476.478	442.081	-0.93233	0.164747	-5.65916	1.52112e-08	1.92222e-07
ENSMUSG00000001909	Trmt1	251.196	197.274	241.936	241.936	151.823	103.915	116.813	136.393	180.161	0.843297	0.194941	4.3259	1.51908e-05	9.88001e-05
ENSMUSG00000001910	Nacc1	16.4047	25.4547	39.7548	39.7548	41.3341	73.9394	101.538	86.1429	53.0404	-1.16088	0.36594	-3.17232	0.00151225	0.00554853
ENSMUSG00000001911	Nfix	79.9727	100.758	40.8907	40.8907	73.9244	86.9288	81.7694	87.9375	74.134	-0.299531	0.31995	-0.93618	0.349181	0.478493
ENSMUSG00000001918	Slc1a5	877.65	911.065	755.341	755.341	487.265	579.525	664.938	599.411	703.817	0.493493	0.144349	3.41874	0.000629122	0.00260587
ENSMUSG00000001924	Uba1	556.733	530.306	766.7	766.7	1687.54	1487.78	1512.28	1738.11	1130.77	-1.26832	0.158572	-7.99836	1.26089e-15	5.33213e-14
ENSMUSG00000001930	Vwf	45.1128	82.7277	67.0152	67.0152	40.5392	36.9697	31.4498	39.4822	51.289	0.754632	0.297604	2.5357	0.0112224	0.030779
ENSMUSG00000001942	Siae	61.5175	103.94	72.6945	72.6945	240.056	258.788	229.134	237.79	159.577	-1.57513	0.210095	-7.49726	6.51669e-14	2.03271e-12
ENSMUSG00000001962	Fam50a	754.615	525.003	425.944	425.944	406.187	360.704	409.745	422.638	466.348	0.401304	0.199725	2.00928	0.0445074	0.0956387
ENSMUSG00000001964	Emd	143.541	204.698	160.155	160.155	223.363	150.876	171.626	122.933	167.168	-0.00211614	0.231201	-0.00915284	0.992697	0.995366
ENSMUSG00000001995	Sipa1l2	340.397	256.668	435.031	435.031	193.952	278.772	292.033	270.094	312.747	0.484608	0.214944	2.25457	0.02416	0.058561
ENSMUSG00000001998	Ap4e1	147.642	55.1518	107.906	107.906	108.105	104.914	103.335	64.6072	99.9458	0.125137	0.305284	0.409904	0.681877	0.773785
ENSMUSG00000001999	Blvra	799.727	937.58	703.092	703.092	790.117	631.483	493.312	682.862	717.658	0.268029	0.174605	1.53506	0.124768	0.217552
ENSMUSG00000002010	Idh3g	487.014	526.063	547.48	547.48	713.013	631.483	660.445	618.255	591.404	-0.312661	0.119991	-2.60571	0.00916845	0.0258616
ENSMUSG00000002014	Ssr4	812.031	1039.4	696.277	696.277	443.546	444.636	575.98	529.42	654.696	0.685368	0.173855	3.94218	8.07456e-05	0.000427037
ENSMUSG00000002015	Bcap31	1017.09	807.125	714.451	714.451	1166.1	973.203	1108.83	1118.96	952.526	-0.416845	0.149859	-2.78157	0.00540962	0.0164753
ENSMUSG00000002017	Fam98a	32.8093	13.7879	94.2757	94.2757	88.2324	89.9263	93.4507	138.188	80.6182	-0.669003	0.418223	-1.59963	0.10968	0.19633
ENSMUSG00000002028	Kmt2a	203.008	274.698	203.317	203.317	209.055	240.803	211.163	249.455	224.352	-0.0397902	0.179527	-0.22164	0.824594	0.883041
ENSMUSG00000002031	Ift46	50.2393	108.182	111.313	111.313	87.4375	87.928	72.7837	75.375	88.0716	0.217953	0.285616	0.763098	0.445405	0.56994
ENSMUSG00000002043	Trappc6a	286.056	345.759	218.084	218.084	100.951	125.897	140.176	113.96	193.621	1.10756	0.217713	5.08727	3.63261e-07	3.45776e-06
ENSMUSG00000002052	Supt6	168.148	230.153	194.231	194.231	310.8	331.728	392.673	357.134	272.387	-0.804416	0.168298	-4.77971	1.75548e-06	1.42719e-05
ENSMUSG00000002055	Spag5	0	22.2728	38.619	38.619	21.4619	63.9476	10.7828	33.2009	28.613	-0.239301	0.540148	-0.443029	0.657745	0.754095
ENSMUSG00000002058	Unc119	98.428	58.3336	44.2982	44.2982	81.0784	68.9435	62.8995	52.942	63.9027	-0.103421	0.320253	-0.322936	0.746744	0.823905
ENSMUSG00000002059	Rab34	21.5311	4.24244	29.5321	29.5321	21.4619	38.9681	46.7254	40.3795	29.0466	-0.637573	0.449667	-1.41788	0.156226	0.259705
ENSMUSG00000002064	Sdf2	182.502	288.486	181.736	181.736	248.799	266.781	212.061	187.54	218.705	-0.127233	0.217954	-0.583758	0.559383	0.672983
ENSMUSG00000002068	Ccne1	6.15175	66.8185	15.9019	15.9019	12.7182	22.9812	29.6526	54.7366	28.1078	-0.138353	0.508513	-0.272073	0.785566	0.853883
ENSMUSG00000002083	Bbc3	79.9727	72.1216	46.5699	46.5699	107.31	82.9321	80.8708	82.5536	74.8625	-0.492164	0.27676	-1.77831	0.0753536	0.14685
ENSMUSG00000002100	Mybpc3	7.17704	1.06061	6.81511	6.81511	3.17954	11.9902	7.18852	19.7411	7.9959	-0.58084	0.543794	-1.06813	0.285464	0.412104
ENSMUSG00000002102	Psmc3	1076.56	983.187	750.798	750.798	892.657	740.393	760.186	748.366	837.868	0.177296	0.159631	1.11066	0.266716	0.391761
ENSMUSG00000002103	Acp2	1513.33	1170.91	1353.94	1353.94	1118.4	1501.77	1417.93	1507.5	1367.22	-0.0394218	0.14163	-0.278344	0.780748	0.850634
ENSMUSG00000002104	Rapsn	62.5428	60.4548	59.0643	59.0643	25.4364	55.9542	54.8124	43.9688	52.6622	0.389957	0.310443	1.25613	0.209069	0.324319
ENSMUSG00000002105	Slc39a13	275.803	424.244	324.854	324.854	203.491	132.891	203.974	235.996	265.763	0.765651	0.216157	3.5421	0.000396955	0.00174918
ENSMUSG00000002107	Celf2	1241.63	1280.16	1182.42	1182.42	1260.69	1449.81	1203.18	1416.87	1277.15	-0.123736	0.111895	-1.10582	0.268803	0.393962
ENSMUSG00000002108	Nr1h3	419.344	256.668	380.51	380.51	145.464	317.74	329.773	497.116	340.891	0.144793	0.291721	0.496339	0.619655	0.724739
ENSMUSG00000002109	Ddb2	127.136	119.849	109.042	109.042	15.8977	11.9902	33.2469	32.3036	69.8134	2.09893	0.324089	6.4764	9.39346e-11	1.81082e-09
ENSMUSG00000002111	Spi1	3127.14	2779.86	2363.71	2363.71	2138.24	2262.15	2468.36	2385.98	2486.14	0.198053	0.128321	1.54341	0.12273	0.214733
ENSMUSG00000002129	Sf3a1	248.121	135.758	154.476	154.476	302.057	274.775	264.178	323.933	232.222	-0.719596	0.216238	-3.32779	0.000875367	0.0034521
ENSMUSG00000002147	Stat6	1489.75	954.55	1307.37	1307.37	1954.62	1680.62	1759.39	1590.95	1505.58	-0.456742	0.153397	-2.97752	0.00290588	0.00970955
ENSMUSG00000002204	Napsa	807.93	508.033	537.258	537.258	585.036	774.366	793.432	933.214	684.566	-0.356048	0.19651	-1.81186	0.0700074	0.138526
ENSMUSG00000002205	Vrk3	152.768	118.788	122.672	122.672	166.131	159.869	172.524	205.487	152.614	-0.431248	0.193225	-2.23185	0.025625	0.061375
ENSMUSG00000002210	Smg9	260.424	283.183	204.453	204.453	175.67	163.866	189.597	167.799	206.181	0.438945	0.183585	2.39096	0.0168042	0.0433328
ENSMUSG00000002221	Paxip1	147.642	258.789	169.242	169.242	179.644	198.837	176.119	248.558	193.509	-0.103437	0.226487	-0.4567	0.647887	0.746552
ENSMUSG00000002222	Rmnd5a	98.428	131.516	186.28	186.28	298.877	441.638	360.324	442.38	268.215	-1.2955	0.234749	-5.51866	3.41599e-08	4.06989e-07
ENSMUSG00000002227	Mov10	51.2646	11.6667	19.3095	19.3095	96.9761	71.9411	70.9866	117.549	57.3754	-1.55437	0.389793	-3.98768	6.67219e-05	0.000361631
ENSMUSG00000002233	Rhoc	96.3774	154.849	118.129	118.129	125.592	112.907	68.2909	76.2723	108.818	0.325645	0.268981	1.21066	0.226025	0.345992
ENSMUSG00000002250	Ppard	50.2393	65.7579	88.5964	88.5964	15.8977	15.9869	30.5512	21.5357	47.1452	1.6142	0.34152	4.72653	2.28387e-06	1.79802e-05
ENSMUSG00000002257	Def6	196.856	164.395	231.714	231.714	139.105	165.864	170.727	140.879	180.157	0.406778	0.19347	2.10254	0.0355058	0.0795719
ENSMUSG00000002279	Lmf1	139.44	123.031	136.302	136.302	200.311	180.852	167.133	117.549	150.115	-0.303903	0.215626	-1.4094	0.158717	0.262828
ENSMUSG00000002280	Narfl	257.348	151.667	239.665	239.665	193.157	147.879	126.698	148.955	188.129	0.502786	0.225748	2.2272	0.025934	0.0620456
ENSMUSG00000002289	Angptl4	51.2646	6.36367	44.2982	44.2982	124.797	252.793	144.669	164.21	104.087	-1.90106	0.396084	-4.79965	1.58942e-06	1.30208e-05
ENSMUSG00000002297	Dbf4	117.909	91.2126	148.797	148.797	84.2579	137.887	151.857	183.951	133.083	-0.129844	0.273451	-0.474833	0.634906	0.736692
ENSMUSG00000002307	Daxx	488.039	445.457	615.632	615.632	516.676	368.698	274.961	306.884	453.997	0.538451	0.21513	2.50291	0.0123177	0.03333
ENSMUSG00000002308	Cd320	22.5564	31.8183	29.5321	29.5321	34.975	29.9754	31.4498	34.9955	30.6043	-0.194174	0.32928	-0.589691	0.555398	0.669695
ENSMUSG00000002319	Ipo4	399.864	296.971	460.02	460.02	243.235	243.8	301.019	204.589	326.19	0.681187	0.195801	3.47898	0.00050333	0.00215491
ENSMUSG00000002320	Tm9sf1	393.712	395.608	399.82	399.82	368.032	304.75	389.078	335.598	373.302	0.18135	0.138909	1.30553	0.191713	0.303693
ENSMUSG00000002325	Irf9	332.194	249.244	414.586	414.586	553.241	422.654	363.02	438.79	398.539	-0.323303	0.205051	-1.5767	0.114865	0.203669
ENSMUSG00000002326	Gmpr2	448.052	305.456	407.771	407.771	240.056	291.761	397.165	330.214	353.531	0.307625	0.197734	1.55575	0.119768	0.210756
ENSMUSG00000002329	Mdp1	205.058	178.183	149.932	149.932	194.747	171.859	129.393	197.411	172.065	-0.0203072	0.212301	-0.095653	0.923796	0.949807
ENSMUSG00000002332	Dhrs1	358.852	323.486	374.831	374.831	421.29	403.669	308.208	445.072	376.28	-0.137719	0.161814	-0.851097	0.394715	0.523109
ENSMUSG00000002342	Tmem161a	111.757	96.5156	120.4	120.4	151.823	114.906	75.4794	105.884	112.146	0.000929178	0.252071	0.00368618	0.997059	0.998284
ENSMUSG00000002343	Armc6	25.6323	37.1214	5.67926	5.67926	32.5903	23.9804	25.1598	23.3304	22.3966	-0.37458	0.484665	-0.772864	0.439603	0.564731
ENSMUSG00000002345	Borcs8	70.7451	103.94	70.4228	70.4228	50.8727	71.9411	68.2909	60.1205	70.8445	0.31236	0.264965	1.17887	0.238448	0.360087
ENSMUSG00000002365	Snx9	615.175	783.792	579.284	579.284	1088.99	778.362	709.866	773.491	738.531	-0.38006	0.176636	-2.15166	0.031424	0.0721162
ENSMUSG00000002372	Ranbp3	315.79	287.426	365.744	365.744	253.569	253.792	217.453	225.228	285.593	0.479646	0.159076	3.01519	0.00256815	0.00871722
ENSMUSG00000002379	Ndufa11	508.545	606.67	339.62	339.62	335.442	285.766	337.86	308.679	382.775	0.483224	0.210486	2.29575	0.0216899	0.0535787
ENSMUSG00000002393	Nr2f6	85.0992	109.243	114.721	114.721	122.412	124.898	133.886	109.473	114.307	-0.205058	0.20848	-0.983589	0.325318	0.454205
ENSMUSG00000002395	Use1	639.782	548.336	502.046	502.046	280.595	273.776	283.048	284.451	414.26	0.951363	0.141116	6.7417	1.56544e-11	3.49658e-10
ENSMUSG00000002396	Ocel1	156.87	212.122	195.366	195.366	165.336	119.902	145.567	113.063	162.949	0.462948	0.20564	2.25126	0.0243692	0.0589612
ENSMUSG00000002413	Braf	680.794	676.67	910.953	910.953	200.311	291.761	397.165	358.031	553.33	1.29819	0.215894	6.01309	1.82015e-09	2.71222e-08
ENSMUSG00000002416	Ndufb2	420.37	607.73	328.261	328.261	162.157	188.845	209.366	181.259	303.281	1.136	0.222461	5.10649	3.28192e-07	3.15483e-06
ENSMUSG00000002428	Hltf	163.021	125.152	181.736	181.736	149.439	223.817	170.727	331.112	190.843	-0.400117	0.263219	-1.5201	0.128487	0.222477
ENSMUSG00000002455	Prpf6	233.766	255.607	327.125	327.125	294.108	306.749	179.713	270.094	274.286	0.117114	0.212864	0.550183	0.582194	0.692588
ENSMUSG00000002458	Rgs19	378.333	328.789	332.805	332.805	491.24	441.638	486.123	515.063	413.349	-0.487571	0.132294	-3.68552	0.000228239	0.00107479
ENSMUSG00000002477	Snrpd1	192.755	326.668	211.268	211.268	178.849	193.841	245.308	253.942	226.738	0.107357	0.22203	0.483525	0.628723	0.732278
ENSMUSG00000002486	Tchp	58.4416	65.7579	64.7435	64.7435	77.1039	12.9894	43.1311	34.9955	52.7383	0.500559	0.395698	1.265	0.20587	0.320619
ENSMUSG00000002489	Tiam1	196.856	226.971	282.827	282.827	267.877	106.912	198.583	182.156	218.126	0.364144	0.260815	1.39618	0.162661	0.267892
ENSMUSG00000002496	Tsc2	120.984	141.061	137.438	137.438	394.263	329.73	260.584	288.04	226.192	-1.20912	0.190212	-6.35669	2.06148e-10	3.68825e-09
ENSMUSG00000002504	Slc9a3r2	10.2529	1.06061	14.7661	14.7661	20.667	8.99263	9.88421	8.07589	11.0582	-0.154261	0.526879	-0.292782	0.769689	0.842124
ENSMUSG00000002524	Puf60	686.945	689.397	565.654	565.654	768.655	676.446	655.952	610.179	652.36	-0.110672	0.140603	-0.787123	0.43121	0.557188
ENSMUSG00000002546	Golga2	57.4163	138.94	149.932	149.932	289.339	232.809	179.713	257.531	181.952	-0.886973	0.284522	-3.11741	0.00182445	0.0065066
ENSMUSG00000002550	Uck1	215.311	210.001	208.997	208.997	195.542	113.907	122.205	137.29	176.531	0.54369	0.211933	2.56539	0.0103061	0.0286402
ENSMUSG00000002565	Scin	20.5058	2.12122	11.3585	11.3585	19.0773	14.9877	47.6239	3.58929	16.3278	-0.587327	0.535318	-1.09716	0.272573	0.398179
ENSMUSG00000002580	Mien1	315.79	285.304	227.17	227.17	183.619	201.835	224.641	166.004	228.942	0.431868	0.189936	2.27375	0.0229808	0.0561864
ENSMUSG00000002602	Axl	1269.31	1021.37	1201.73	1201.73	841.784	1741.57	1548.23	2296.25	1390.25	-0.432175	0.235823	-1.83263	0.066858	0.133214
ENSMUSG00000002603	Tgfb1	309.638	341.517	589.507	589.507	463.419	567.535	782.65	699.911	542.96	-0.435473	0.243356	-1.78945	0.0735423	0.14395
ENSMUSG00000002608	Ccdc97	142.516	211.062	189.687	189.687	215.414	198.837	187.8	157.929	186.616	-0.0516285	0.19706	-0.261993	0.793327	0.85975
ENSMUSG00000002617	Zfp40	17.43	33.9396	12.4944	12.4944	31.0006	21.982	13.4785	34.0982	22.1147	-0.319978	0.441215	-0.72522	0.468317	0.590864
ENSMUSG00000002625	Akap8l	394.737	470.911	408.907	408.907	196.337	198.837	192.293	140.879	301.476	1.18076	0.168737	6.99765	2.60284e-12	6.41655e-11
ENSMUSG00000002635	Pdcd2l	291.183	360.608	295.321	295.321	184.414	189.844	118.611	139.982	234.411	0.941262	0.200415	4.69656	2.64579e-06	2.06089e-05
ENSMUSG00000002658	Gtf2f1	585.442	448.639	385.054	385.054	434.008	459.623	369.31	359.826	428.369	0.149683	0.181469	0.824838	0.409464	0.537462
ENSMUSG00000002660	Clpp	209.159	185.607	130.623	130.623	96.9761	82.9321	139.277	89.7322	133.116	0.645124	0.25498	2.5301	0.011403	0.0312102
ENSMUSG00000002661	Alkbh7	73.821	65.7579	42.0265	42.0265	40.5392	43.964	35.9426	35.8929	47.4963	0.476054	0.311557	1.52798	0.126517	0.219955
ENSMUSG00000002668	Dennd1c	341.422	440.154	515.677	515.677	340.211	308.747	218.351	263.813	368.006	0.657587	0.198274	3.31656	0.000911322	0.00357938
ENSMUSG00000002679	Med6	174.3	153.789	131.759	131.759	124.002	98.919	119.509	130.112	133.018	0.312812	0.204326	1.53095	0.125783	0.218928
ENSMUSG00000002699	Lcp2	1107.31	743.488	1043.85	1043.85	1481.67	1248.98	1310.11	1623.25	1200.31	-0.513705	0.158411	-3.24285	0.00118339	0.00449342
ENSMUSG00000002718	Cse1l	551.607	283.183	532.714	532.714	546.882	588.518	680.213	550.955	533.348	-0.305275	0.209149	-1.45961	0.144398	0.24383
ENSMUSG00000002728	Naa20	481.887	547.275	517.948	517.948	347.365	332.727	346.846	330.214	427.776	0.597787	0.122808	4.86764	1.12938e-06	9.59753e-06
ENSMUSG00000002731	Prkra	34.8599	57.273	39.7548	39.7548	90.617	132.891	74.5809	104.987	71.8398	-1.14075	0.289455	-3.94103	8.1132e-05	0.000428869
ENSMUSG00000002732	Fkbp7	12.3035	37.1214	15.9019	15.9019	41.3341	37.9689	17.0727	24.2277	25.229	-0.464268	0.434685	-1.06806	0.285496	0.412104
ENSMUSG00000002733	Plekha3	244.019	123.031	154.476	154.476	213.824	335.725	383.687	346.366	244.451	-0.870403	0.250654	-3.47252	0.000515588	0.00220298
ENSMUSG00000002741	Ykt6	223.514	268.335	241.936	241.936	376.776	338.722	334.266	359.826	298.164	-0.522519	0.143872	-3.63182	0.000281429	0.00129063
ENSMUSG00000002748	Baz1b	276.829	305.456	388.461	388.461	471.367	431.646	474.442	524.933	407.7	-0.475681	0.164135	-2.89811	0.00375419	0.012048
ENSMUSG00000002763	Pex6	171.224	251.365	345.299	345.299	194.747	141.884	133.886	164.21	218.489	0.766917	0.246797	3.10748	0.0018869	0.00668695
ENSMUSG00000002767	Mrpl2	318.866	202.577	157.883	157.883	192.362	190.844	205.771	182.156	201.043	0.114222	0.24196	0.472068	0.636879	0.738278
ENSMUSG00000002768	Mea1	332.194	404.093	231.714	231.714	212.235	166.863	197.684	157.929	241.803	0.677666	0.224746	3.01525	0.00256764	0.00871722
ENSMUSG00000002778	Kdelr1	86.1245	65.7579	114.721	114.721	303.646	237.805	161.742	192.027	159.568	-1.16149	0.262481	-4.42504	9.64259e-06	6.56273e-05
ENSMUSG00000002781	Tmem143	0	8.48489	11.3585	11.3585	15.8977	17.9853	8.98564	23.3304	12.1751	-0.714556	0.531416	-1.34463	0.178746	0.288711
ENSMUSG00000002797	Ggct	4.10117	19.091	55.6567	55.6567	15.1028	27.9771	26.0584	30.5089	29.2691	0.317429	0.493415	0.643331	0.52001	0.638418
ENSMUSG00000002799	Jag2	85.0992	150.607	119.264	119.264	9.53863	47.9607	68.2909	28.7143	78.5924	1.37326	0.402743	3.40976	0.000650202	0.0026819
ENSMUSG00000002803	Btbd6	33.8346	37.1214	43.1624	43.1624	27.0261	34.9713	28.7541	20.6384	33.5838	0.451244	0.329628	1.36895	0.171016	0.278493
ENSMUSG00000002804	Nudt14	178.401	224.85	114.721	114.721	61.2062	97.9198	81.7694	78.9643	119.069	0.922624	0.277815	3.321	0.000896954	0.00352943
ENSMUSG00000002812	Flii	834.587	828.337	1007.5	1007.5	1616	1299.94	1359.53	1384.57	1167.24	-0.61389	0.131962	-4.65201	3.28709e-06	2.49777e-05
ENSMUSG00000002814	Top3a	92.2762	70.0003	87.4606	87.4606	147.849	112.907	62.0009	109.473	96.1785	-0.335081	0.28248	-1.18621	0.23554	0.357167
ENSMUSG00000002820	Atg4d	247.095	136.819	143.117	143.117	163.747	97.9198	80.8708	87.9375	137.578	0.591636	0.288672	2.04951	0.0404121	0.0884191
ENSMUSG00000002825	Qtrt1	164.047	196.213	86.3247	86.3247	62.796	53.9558	54.8124	57.4286	95.2377	1.121	0.304799	3.67783	0.000235223	0.00110428
ENSMUSG00000002833	Hdgfrp2	323.992	266.213	307.816	307.816	97.771	213.825	156.35	136.393	226.272	0.954893	0.231907	4.11757	3.82882e-05	0.000222513
ENSMUSG00000002835	Chaf1a	9.22762	13.7879	39.7548	39.7548	48.4881	52.9566	58.4067	83.4509	43.2284	-1.04484	0.415486	-2.51474	0.011912	0.0324126
ENSMUSG00000002844	Adprh	481.887	492.124	491.824	491.824	584.241	450.631	481.631	576.08	506.28	-0.0956439	0.138838	-0.688888	0.490893	0.611487
ENSMUSG00000002845	Tmem39a	104.58	60.4548	134.03	134.03	70.7449	92.9239	100.639	124.728	102.766	0.142984	0.293294	0.48751	0.625897	0.730258
ENSMUSG00000002846	Timmdc1	31.784	49.8487	34.0755	34.0755	19.0773	31.9738	22.4641	20.6384	30.4922	0.599878	0.353291	1.69797	0.0895127	0.168076
ENSMUSG00000002870	Mcm2	167.123	98.6368	278.284	278.284	192.362	297.756	258.787	225.228	224.557	-0.226809	0.292183	-0.776258	0.437597	0.563307
ENSMUSG00000002871	Tpra1	747.438	561.063	634.941	634.941	430.033	444.636	348.643	316.755	514.806	0.727272	0.164854	4.41162	1.02599e-05	6.95193e-05
ENSMUSG00000002881	Nab1	629.529	491.063	646.3	646.3	734.475	858.297	811.404	966.415	722.973	-0.473362	0.148607	-3.18533	0.00144589	0.00533435
ENSMUSG00000002885	Adgre5	1027.34	656.518	1166.52	1166.52	2539.66	1213.01	941.696	998.719	1213.75	-0.469354	0.281588	-1.66681	0.0955519	0.176565
ENSMUSG00000002897	Il17ra	924.813	784.852	1227.86	1227.86	823.502	835.316	919.231	1003.21	968.329	0.212459	0.170672	1.24484	0.21319	0.329661
ENSMUSG00000002910	Arrdc2	178.401	113.485	121.536	121.536	63.5909	53.9558	47.6239	56.5313	94.5825	1.20433	0.248291	4.85049	1.23155e-06	1.03425e-05
ENSMUSG00000002944	Cd36	550.582	930.156	564.518	564.518	5191.4	1306.93	822.186	931.42	1357.71	-1.23324	0.488792	-2.52304	0.0116344	0.0317217
ENSMUSG00000002948	Map2k7	44.0875	55.1518	70.4228	70.4228	88.2324	79.9345	75.4794	79.8616	70.4491	-0.40937	0.258042	-1.58645	0.112638	0.200684
ENSMUSG00000002949	Timm44	227.615	323.486	276.012	276.012	193.157	196.839	156.35	191.13	230.075	0.565556	0.178828	3.16257	0.00156382	0.00571036
ENSMUSG00000002957	Ap2a2	1506.15	1367.13	1303.96	1303.96	2266.22	1551.73	1186.11	1317.27	1475.31	-0.199706	0.191943	-1.04045	0.298132	0.426262
ENSMUSG00000002963	Pnkp	425.496	266.213	349.842	349.842	209.055	213.825	181.51	174.08	271.233	0.81399	0.18731	4.34567	1.38848e-05	9.15305e-05
ENSMUSG00000002968	Med25	255.298	219.547	279.419	279.419	214.619	249.795	290.236	168.696	244.629	0.157469	0.203094	0.77535	0.438133	0.563615
ENSMUSG00000002980	Bcam	0	0	0	0	9.53863	1.99836	8.08708	8.07589	3.4625	-1.53841	0.543285	-2.83168	0.00463042	0.0144098
ENSMUSG00000002981	Clptm1	612.099	508.033	482.737	482.737	970.556	1189.03	1275.96	1188.05	838.65	-1.12855	0.143327	-7.874	3.43467e-15	1.33143e-13
ENSMUSG00000002983	Relb	808.955	512.275	707.636	707.636	372.802	459.623	573.284	611.973	594.273	0.425754	0.198021	2.15004	0.0315518	0.0723163
ENSMUSG00000002984	Tomm40	376.282	529.245	288.506	288.506	224.953	226.814	251.598	227.92	301.728	0.645846	0.214695	3.0082	0.00262799	0.00888368
ENSMUSG00000002985	Apoe	71141.9	82103	56242.8	56242.8	65449.3	78240.9	60033.1	55210.4	65583	0.0365955	0.161579	0.226486	0.820823	0.881018
ENSMUSG00000002996	Hbp1	1200.62	1227.13	873.47	873.47	1472.92	1202.02	1204.97	1253.56	1163.52	-0.291976	0.158946	-1.83695	0.0662172	0.1322
ENSMUSG00000002997	Prkar2b	55.3657	112.425	106.77	106.77	288.544	127.895	141.075	166.004	138.106	-0.851827	0.305428	-2.78896	0.00528774	0.0161365
ENSMUSG00000003031	Cdkn1b	141.49	135.758	344.163	344.163	192.362	267.781	232.728	253.045	238.936	0.02675	0.300375	0.0890551	0.929038	0.9533
ENSMUSG00000003032	Klf4	468.558	599.245	548.616	548.616	637.499	1137.07	1617.42	1321.75	859.847	-1.07127	0.23331	-4.59162	4.39817e-06	3.23187e-05
ENSMUSG00000003033	Ap1m1	642.858	432.729	507.726	507.726	491.24	413.661	436.702	423.536	482.022	0.239176	0.158932	1.50489	0.132352	0.227695
ENSMUSG00000003037	Rab8a	1214.97	893.035	1002.96	1002.96	918.093	1031.16	939.898	1081.27	1010.54	0.0508939	0.134874	0.377345	0.705917	0.792467
ENSMUSG00000003038	Hmgn2	939.167	934.398	675.832	675.832	569.138	684.439	754.794	891.04	765.58	0.149974	0.184252	0.813965	0.415665	0.542948
ENSMUSG00000003039	Fam32a	766.918	565.306	412.314	412.314	400.623	544.554	385.484	476.478	495.499	0.246104	0.219868	1.11933	0.263001	0.387636
ENSMUSG00000003062	Stard3nl	558.784	560.003	541.801	541.801	589.011	481.605	448.384	590.438	538.978	0.0605797	0.141547	0.427983	0.668664	0.763097
ENSMUSG00000003068	Stk11	213.261	269.395	274.876	274.876	121.618	131.892	146.466	91.5268	190.489	1.03434	0.202953	5.09647	3.46052e-07	3.30868e-06
ENSMUSG00000003072	Atp5d	1161.66	1208.04	997.278	997.278	759.911	899.263	870.709	972.697	983.353	0.313468	0.132618	2.36369	0.0180937	0.0461026
ENSMUSG00000003099	Ppp5c	114.833	213.183	141.981	141.981	173.285	195.84	150.959	180.362	164.053	-0.185843	0.227426	-0.817156	0.413839	0.541081
ENSMUSG00000003119	Cdk12	280.93	372.275	415.722	415.722	226.543	195.84	241.714	198.308	293.381	0.761091	0.181418	4.19523	2.72596e-05	0.000164033
ENSMUSG00000003123	Lipe	48.1887	35.0002	82.9172	82.9172	88.2324	95.9214	105.132	104.987	80.412	-0.613588	0.300744	-2.04023	0.041327	0.090034
ENSMUSG00000003131	Pafah1b2	431.648	379.699	499.775	499.775	772.629	763.375	799.722	634.406	597.629	-0.701635	0.148671	-4.71937	2.36573e-06	1.85564e-05
ENSMUSG00000003134	Tbc1d8	232.741	178.183	235.121	235.121	155.003	256.79	293.831	202.795	223.698	-0.0409781	0.225538	-0.18169	0.855826	0.904567
ENSMUSG00000003135	Cnot11	90.2257	62.5761	88.5964	88.5964	151.823	132.891	106.031	122.036	105.347	-0.608544	0.232344	-2.61915	0.00881499	0.0250163
ENSMUSG00000003154	Foxj2	106.63	135.758	131.759	131.759	260.723	340.721	348.643	322.138	222.266	-1.29443	0.181472	-7.13294	9.82483e-13	2.59545e-11
ENSMUSG00000003161	Sri	1675.33	1536.83	1132.44	1132.44	1197.89	1098.1	1207.67	1283.17	1282.98	0.190593	0.158628	1.20151	0.229555	0.349709
ENSMUSG00000003166	Dgcr2	99.4533	95.455	137.438	137.438	202.696	136.888	138.379	219.844	145.949	-0.544601	0.245166	-2.22135	0.026327	0.0627194
ENSMUSG00000003184	Irf3	352.7	427.426	433.895	433.895	232.107	155.872	138.379	161.518	291.974	1.21805	0.195809	6.22064	4.9514e-10	8.27734e-09
ENSMUSG00000003190	Bcl2l12	25.6323	35.0002	36.3473	36.3473	19.0773	20.9828	26.0584	26.0223	28.1835	0.475098	0.346895	1.36957	0.17082	0.278277
ENSMUSG00000003198	Zfp959	20.5058	8.48489	18.1736	18.1736	31.7954	35.9705	30.5512	35.8929	24.9435	-0.898366	0.381826	-2.35282	0.0186318	0.0471926
ENSMUSG00000003199	Mpnd	375.257	479.396	406.635	406.635	279.005	259.787	239.917	248.558	336.899	0.686303	0.14813	4.63311	3.60207e-06	2.71207e-05
ENSMUSG00000003200	Sh3gl1	719.755	814.549	613.36	613.36	587.421	418.657	426.818	345.469	567.424	0.615776	0.187347	3.28682	0.00101326	0.00392641
ENSMUSG00000003206	Ebi3	131.237	138.94	113.585	113.585	123.207	113.907	104.233	155.237	124.241	0.00253421	0.21484	0.0117958	0.990589	0.994119
ENSMUSG00000003208	Ccdc94	27.6829	38.182	30.668	30.668	41.3341	13.9885	27.8555	17.9464	28.5407	0.276469	0.394694	0.700465	0.483637	0.605066
ENSMUSG00000003226	Ranbp2	518.798	504.851	1025.67	1025.67	769.45	869.288	981.232	1034.61	841.197	-0.237462	0.240145	-0.988831	0.322746	0.451734
ENSMUSG00000003228	Grk5	20.5058	50.9093	12.4944	12.4944	46.1034	27.9771	31.4498	24.2277	28.2702	-0.343748	0.444742	-0.772915	0.439573	0.564731
ENSMUSG00000003233	Dvl3	65.6187	44.5457	87.4606	87.4606	112.874	67.9443	91.6536	74.4777	79.0044	-0.266162	0.293817	-0.905878	0.365	0.494026
ENSMUSG00000003234	Abcf3	438.825	359.547	539.53	539.53	286.954	234.808	272.265	269.196	367.582	0.798058	0.176177	4.52985	5.90244e-06	4.2066e-05
ENSMUSG00000003235	Eif2b5	259.399	175.001	232.85	232.85	199.516	226.814	224.641	229.714	222.598	0.0312824	0.178787	0.17497	0.861103	0.908395
ENSMUSG00000003269	Cyth2	500.342	293.789	347.571	347.571	231.312	237.805	189.597	209.076	294.633	0.75465	0.198006	3.81125	0.000138266	0.000687731
ENSMUSG00000003283	Hck	1137.05	1020.31	1139.26	1139.26	944.325	1420.84	1347.85	1878.99	1253.48	-0.324272	0.187601	-1.72852	0.0838948	0.15977
ENSMUSG00000003299	Mrpl4	611.074	513.336	362.337	362.337	426.854	399.673	372.006	362.518	426.267	0.237242	0.196029	1.21024	0.226186	0.346055
ENSMUSG00000003308	Keap1	140.465	84.8489	148.797	148.797	259.133	215.823	188.699	195.616	172.772	-0.686998	0.227954	-3.01376	0.00258029	0.00874863
ENSMUSG00000003316	Glg1	410.117	546.215	507.726	507.726	1272.61	1313.92	1366.72	1363.93	911.121	-1.41314	0.126221	-11.1958	4.27609e-29	8.8884e-27
ENSMUSG00000003344	Btbd2	60.4922	74.2428	59.0643	59.0643	104.13	99.9181	70.9866	88.8348	77.0917	-0.497508	0.248371	-2.00308	0.0451682	0.0969029
ENSMUSG00000003345	Csnk1g2	382.434	450.76	519.084	519.084	388.699	347.715	326.179	352.647	410.825	0.393963	0.154743	2.54592	0.010899	0.0300615
ENSMUSG00000003346	Abhd17a	413.193	628.942	389.597	389.597	346.57	389.681	401.658	391.232	418.809	0.245696	0.187337	1.31152	0.189681	0.301366
ENSMUSG00000003348	Mob3a	203.008	129.395	101.091	101.091	201.106	170.86	142.872	166.902	152.04	-0.329677	0.25818	-1.27693	0.201628	0.315291
ENSMUSG00000003360	Ddx23	76.8969	67.8791	106.77	106.77	29.4108	64.9468	30.5512	43.9688	65.8992	0.990962	0.32132	3.08404	0.0020421	0.00717047
ENSMUSG00000003363	Pld3	2464.8	1938.8	2095.65	2095.65	3875.86	3023.52	2666.04	2585.18	2593.19	-0.489838	0.154705	-3.16627	0.00154407	0.00564592
ENSMUSG00000003380	Rabac1	650.035	798.64	554.296	554.296	868.016	585.52	631.691	629.92	659.052	-0.0844381	0.181005	-0.466497	0.64086	0.741385
ENSMUSG00000003382	Etv3	3207.11	3185.02	4060.67	4060.67	1359.26	1472.79	1464.66	1600.82	2551.37	1.28148	0.129864	9.86786	5.73769e-23	5.90265e-21
ENSMUSG00000003402	Prkcsh	104.58	112.425	196.502	196.502	268.671	349.713	340.556	304.192	234.143	-1.00083	0.239982	-4.17042	3.0404e-05	0.000180417
ENSMUSG00000003418	St8sia6	98.428	44.5457	103.362	103.362	50.0778	162.867	144.669	145.366	106.585	-0.464329	0.35381	-1.31237	0.189396	0.301047
ENSMUSG00000003420	Fcgrt	1371.84	1943.04	865.519	865.519	2331.4	1401.85	981.232	895.527	1331.99	-0.141342	0.296272	-0.477068	0.633313	0.735703
ENSMUSG00000003421	Nosip	248.121	275.759	181.736	181.736	249.594	202.834	214.757	263.813	227.294	-0.066517	0.202324	-0.328764	0.742334	0.820733
ENSMUSG00000003423	Pih1d1	240.944	206.819	177.193	177.193	147.849	130.893	150.06	127.42	169.796	0.512949	0.189725	2.70364	0.00685842	0.0201257
ENSMUSG00000003429	Rps11	1585.1	2192.28	1323.27	1323.27	1643.03	1733.58	1957.97	2002.82	1720.17	-0.186754	0.175782	-1.06242	0.288044	0.414832
ENSMUSG00000003435	Supt5	532.126	392.426	519.084	519.084	577.087	633.481	654.155	695.424	565.359	-0.376588	0.14708	-2.56042	0.0104545	0.0289924
ENSMUSG00000003437	Paf1	1381.07	1174.1	1256.25	1256.25	436.392	703.424	786.244	809.384	975.389	0.864389	0.187788	4.60299	4.16463e-06	3.08356e-05
ENSMUSG00000003438	Timm50	297.335	341.517	293.05	293.05	205.875	195.84	245.308	220.741	261.589	0.487421	0.156499	3.11453	0.00184241	0.00655677
ENSMUSG00000003444	Med29	343.473	298.032	202.182	202.182	104.13	185.848	146.466	140.879	202.899	0.816291	0.24694	3.30563	0.000947633	0.00370271
ENSMUSG00000003458	Ncstn	964.799	687.276	1000.69	1000.69	1750.34	1602.69	1476.34	1607.1	1261.24	-0.802753	0.148219	-5.41601	6.09441e-08	6.84917e-07
ENSMUSG00000003464	Pex19	321.942	245.001	186.28	186.28	335.442	263.784	328.875	246.763	264.296	-0.308924	0.219635	-1.40653	0.159565	0.263926
ENSMUSG00000003484	Cyp4f18	1313.4	1000.16	818.949	818.949	630.345	817.33	731.431	821.049	868.951	0.387514	0.180421	2.14784	0.0317268	0.072624
ENSMUSG00000003500	Impdh1	181.477	232.274	277.148	277.148	328.288	240.803	247.105	218.946	250.399	-0.0953535	0.206307	-0.462191	0.643944	0.743451
ENSMUSG00000003518	Dusp3	451.128	555.76	413.45	413.45	583.446	402.67	381.89	357.134	444.866	0.0847579	0.193804	0.437339	0.661865	0.757358
ENSMUSG00000003526	Prodh	116.883	55.1518	49.9775	49.9775	16.6926	26.9779	19.7684	30.5089	45.7422	1.3444	0.371757	3.61636	0.00029878	0.00135912
ENSMUSG00000003527	Dgcr14	95.3521	173.94	131.759	131.759	168.516	95.9214	84.4651	106.781	123.562	0.208229	0.277442	0.750531	0.452935	0.57635
ENSMUSG00000003528	Slc25a1	412.167	330.911	210.133	210.133	193.157	214.824	227.337	250.353	256.127	0.37603	0.23875	1.575	0.115257	0.204297
ENSMUSG00000003531	Dgcr6	126.111	127.273	82.9172	82.9172	68.3602	53.9558	63.7981	69.0938	84.3033	0.675753	0.258515	2.61398	0.00894951	0.0253443
ENSMUSG00000003541	Ier3	3768.97	3632.59	4960.26	4960.26	6712.02	5032.88	5064.31	4259.59	4798.86	-0.276005	0.169653	-1.62688	0.103762	0.18797
ENSMUSG00000003545	Fosb	422.42	424.244	447.526	447.526	474.547	869.288	938.101	1003.21	628.357	-0.880932	0.212183	-4.15177	3.29921e-05	0.000194695
ENSMUSG00000003546	Klc4	287.082	412.578	281.691	281.691	315.57	312.744	200.38	240.482	291.527	0.231756	0.211532	1.09561	0.273251	0.398842
ENSMUSG00000003549	Ercc1	109.706	61.5155	95.4115	95.4115	102.54	74.9386	80.8708	101.397	90.224	0.00696313	0.257935	0.0269957	0.978463	0.986206
ENSMUSG00000003559	As3mt	195.831	196.213	148.797	148.797	169.311	184.849	180.611	170.491	174.362	-0.0294363	0.185194	-0.158949	0.873709	0.916183
ENSMUSG00000003573	Homer3	105.605	129.395	126.08	126.08	55.642	34.9713	62.8995	41.2768	85.2435	1.24354	0.25839	4.81266	1.48931e-06	1.22571e-05
ENSMUSG00000003581	Rnf215	357.827	357.426	358.929	358.929	129.566	109.91	62.8995	133.701	233.648	1.64231	0.226019	7.26625	3.69596e-13	1.04335e-11
ENSMUSG00000003604	Aven	46.1381	41.3638	59.0643	59.0643	79.4886	57.9525	53.0153	67.2991	57.9233	-0.307948	0.281113	-1.09546	0.273317	0.398883
ENSMUSG00000003617	Cp	61.5175	26.5153	28.3963	28.3963	88.2324	35.9705	41.334	98.7054	51.1334	-0.739442	0.396749	-1.86375	0.0623564	0.125783
ENSMUSG00000003623	Crot	140.465	207.88	122.672	122.672	244.03	246.798	194.988	165.107	180.577	-0.494087	0.236481	-2.08933	0.0366777	0.0815492
ENSMUSG00000003644	Rps6ka1	492.14	276.82	508.862	508.862	1122.38	1068.12	1065.7	978.978	752.733	-1.20814	0.191126	-6.32116	2.59614e-10	4.55345e-09
ENSMUSG00000003660	Snrnp200	26.6576	164.395	191.959	191.959	466.598	481.605	624.502	713.371	357.631	-1.58203	0.451689	-3.50249	0.000460937	0.00199336
ENSMUSG00000003662	Ciao1	314.765	200.456	145.389	145.389	152.618	141.884	190.496	148.955	179.994	0.327055	0.264517	1.23642	0.216302	0.333942
ENSMUSG00000003665	Has1	110.731	36.0608	57.9284	57.9284	2.38466	9.99181	17.0727	0.897322	36.6245	2.2683	0.493529	4.59608	4.30523e-06	3.17229e-05
ENSMUSG00000003680	Taf6l	537.253	630.003	597.458	597.458	534.958	621.491	642.474	714.268	609.42	-0.0877615	0.137358	-0.638924	0.522873	0.640877
ENSMUSG00000003721	Insig2	93.3015	204.698	87.4606	87.4606	178.054	160.868	127.596	188.438	140.985	-0.433771	0.295522	-1.46781	0.142155	0.24088
ENSMUSG00000003731	Kpna6	19.4805	49.8487	135.166	135.166	110.489	148.878	140.176	129.214	108.552	-0.541372	0.404612	-1.338	0.180895	0.291124
ENSMUSG00000003746	Man1a	1662	1502.89	1769.66	1769.66	1075.48	995.185	983.928	984.362	1342.89	0.723843	0.107669	6.72284	1.78218e-11	3.93957e-10
ENSMUSG00000003752	Itpkc	159.945	103.94	196.502	196.502	127.182	92.9239	70.9866	113.063	132.631	0.655279	0.269325	2.43304	0.0149726	0.0393881
ENSMUSG00000003762	Coq8b	145.591	207.88	155.612	155.612	179.644	137.887	145.567	120.241	156.004	0.179977	0.213502	0.842976	0.399242	0.5278
ENSMUSG00000003778	Brd8	781.272	670.306	833.715	833.715	185.208	317.74	368.411	321.241	538.951	1.34057	0.203651	6.58269	4.61999e-11	9.52393e-10
ENSMUSG00000003779	Kif20a	1.02529	1.06061	27.2604	27.2604	105.72	68.9435	31.4498	44.8661	38.4482	-1.39809	0.532044	-2.62777	0.0085946	0.0244974
ENSMUSG00000003808	Farsa	427.547	448.639	394.141	394.141	215.414	221.818	278.555	262.018	330.284	0.753259	0.153541	4.90593	9.29872e-07	7.99482e-06
ENSMUSG00000003809	Gcdh	57.4163	132.576	57.9284	57.9284	103.335	57.9525	39.5368	38.5848	68.1574	0.305113	0.379109	0.804816	0.420926	0.547736
ENSMUSG00000003810	Mast2	43.0622	59.3942	109.042	109.042	187.593	222.817	212.061	167.799	138.851	-1.21044	0.289595	-4.17978	2.91794e-05	0.000174506
ENSMUSG00000003812	Dnase2a	551.607	619.397	658.794	658.794	403.802	441.638	416.035	431.612	522.71	0.548623	0.125386	4.37546	1.21175e-05	8.08767e-05
ENSMUSG00000003813	Rad23a	391.661	311.82	324.854	324.854	302.057	346.716	291.135	281.759	321.857	0.145913	0.153728	0.949162	0.342538	0.471844
ENSMUSG00000003814	Calr	1725.57	1289.7	2170.61	2170.61	3249.49	3839.85	4120.82	3606.34	2771.62	-0.985523	0.173039	-5.69539	1.2309e-08	1.57528e-07
ENSMUSG00000003824	Syce2	111.757	153.789	77.2379	77.2379	65.1807	73.9394	88.9579	81.6563	91.2194	0.411836	0.281332	1.46388	0.143226	0.242196
ENSMUSG00000003847	Nfat5	906.358	1173.04	1216.5	1216.5	198.722	374.693	517.573	387.643	748.877	1.53441	0.237272	6.46688	1.00044e-10	1.91823e-09
ENSMUSG00000003848	Nob1	63.5681	142.122	122.672	122.672	112.874	98.919	166.234	144.469	121.691	-0.199081	0.281372	-0.707537	0.479233	0.601091
ENSMUSG00000003865	Gys1	83.0486	60.4548	68.1511	68.1511	133.541	99.9181	110.523	129.214	94.1253	-0.725033	0.230923	-3.13972	0.00169108	0.00611041
ENSMUSG00000003868	Ruvbl2	51.2646	142.122	118.129	118.129	147.849	145.88	172.524	148.058	130.494	-0.482119	0.281246	-1.71423	0.086487	0.163687
ENSMUSG00000003873	Bax	1754.27	1825.31	1340.3	1340.3	500.778	678.444	726.04	668.505	1104.25	1.2537	0.167537	7.48314	7.25682e-14	2.25046e-12
ENSMUSG00000003882	Il7r	280.93	278.941	305.544	305.544	419.7	139.885	139.277	149.853	252.459	0.422342	0.314562	1.34263	0.17939	0.289286
ENSMUSG00000003923	Tfam	27.6829	77.4246	48.8416	48.8416	101.745	133.89	115.915	86.1429	80.0605	-1.01569	0.311421	-3.26149	0.0011083	0.0042455
ENSMUSG00000003929	Zfp81	4.10117	41.3638	17.0378	17.0378	39.7443	23.9804	44.9282	27.817	27.0013	-0.602408	0.469671	-1.28262	0.199627	0.312893
ENSMUSG00000003948	Mmd	123.035	88.0307	228.306	228.306	132.746	180.852	184.206	198.308	170.474	-0.0563932	0.295196	-0.191037	0.848497	0.899799
ENSMUSG00000003955	Fam162a	212.235	327.729	199.91	199.91	151.823	151.876	194.988	157.929	199.55	0.497353	0.218565	2.27554	0.0228737	0.0559852
ENSMUSG00000003970	Rpl8	669.515	749.852	808.726	808.726	999.967	1209.01	1342.46	1305.6	986.732	-0.666973	0.138958	-4.79983	1.588e-06	1.30192e-05
ENSMUSG00000003992	Ssbp2	182.502	223.789	169.242	169.242	126.387	106.912	110.523	92.4241	147.628	0.745	0.201649	3.69453	0.000220291	0.00104241
ENSMUSG00000004018	Fancl	75.8716	77.4246	76.1021	76.1021	88.2324	85.9296	88.9579	52.942	77.6953	-0.0465192	0.255477	-0.182088	0.855514	0.904461
ENSMUSG00000004032	Gstm5	11.2782	37.1214	14.7661	14.7661	18.2824	11.9902	31.4498	20.6384	20.0366	-0.0633928	0.455813	-0.139076	0.88939	0.926451
ENSMUSG00000004040	Stat3	2120.3	2436.22	2426.18	2426.18	2542.84	2375.05	2450.39	2646.2	2427.92	-0.0894992	0.0998775	-0.89609	0.370205	0.498781
ENSMUSG00000004043	Stat5a	49.214	120.91	232.85	232.85	316.365	221.818	245.308	181.259	200.072	-0.535101	0.354531	-1.50932	0.131217	0.226316
ENSMUSG00000004044	Ptrf	59.4669	9.5455	52.2492	52.2492	107.31	54.955	40.4354	27.817	50.5035	-0.328391	0.450786	-0.728485	0.466317	0.589035
ENSMUSG00000004054	Map3k11	288.107	210.001	297.593	297.593	816.348	648.469	543.632	524.933	453.334	-1.17613	0.192691	-6.10371	1.03637e-09	1.62107e-08
ENSMUSG00000004056	Akt2	529.05	352.123	375.967	375.967	354.519	434.644	355.832	325.728	387.979	0.148283	0.180493	0.821545	0.411336	0.539126
ENSMUSG00000004069	Dnaja3	227.615	223.789	112.449	112.449	170.901	147.879	167.133	206.384	171.075	-0.0303948	0.272015	-0.111739	0.91103	0.941113
ENSMUSG00000004070	Hmox2	659.263	522.881	438.439	438.439	771.834	531.565	554.414	523.139	554.997	-0.203318	0.191798	-1.06007	0.289115	0.416094
ENSMUSG00000004071	Cdip1	343.473	355.305	523.628	523.628	207.465	222.817	207.568	153.442	317.166	1.10062	0.207774	5.29722	1.17579e-07	1.25797e-06
ENSMUSG00000004085	Zak	76.8969	103.94	156.748	156.748	191.568	186.847	211.163	142.674	153.323	-0.536569	0.259635	-2.06663	0.0387695	0.0854542
ENSMUSG00000004096	Cwc15	585.442	580.154	465.699	465.699	570.728	445.635	477.138	510.576	512.634	0.0639798	0.151896	0.421209	0.673603	0.76677
ENSMUSG00000004098	Col5a3	0	6.36367	7.95096	7.95096	6.35909	91.9247	17.9713	34.0982	21.5774	-1.66019	0.543986	-3.05191	0.00227392	0.00788102
ENSMUSG00000004099	Dnmt1	176.35	221.668	182.872	182.872	265.492	343.718	330.672	364.313	258.495	-0.751704	0.174089	-4.31792	1.57507e-05	0.00010207
ENSMUSG00000004100	Ppan	142.516	333.032	177.193	177.193	54.8471	131.892	199.481	114.857	166.376	0.653443	0.341972	1.91081	0.0560294	0.115458
ENSMUSG00000004105	Angptl2	24.607	59.3942	59.0643	59.0643	89.0272	71.9411	61.1024	35.8929	57.5117	-0.31372	0.358329	-0.875508	0.381298	0.509747
ENSMUSG00000004151	Etv1	20.5058	48.7881	22.717	22.717	170.106	77.9361	65.5952	51.1473	59.939	-1.41846	0.399525	-3.55037	0.000384691	0.00170145
ENSMUSG00000004187	Kifc2	26.6576	0	6.81511	6.81511	11.9233	12.9894	8.98564	3.58929	9.72192	0.0602241	0.556464	0.108226	0.913816	0.943132
ENSMUSG00000004207	Psap	6347.58	6255.48	9901.22	9901.22	29856.7	22621.5	17599.3	14897.3	14672.5	-1.33289	0.223776	-5.95634	2.57943e-09	3.72433e-08
ENSMUSG00000004221	Ikbkg	241.969	193.031	116.993	116.993	226.543	258.788	124.002	222.536	187.607	-0.290199	0.289482	-1.00248	0.316114	0.445014
ENSMUSG00000004233	Wars2	39.9864	39.2426	48.8416	48.8416	48.4881	49.9591	42.2325	34.9955	44.0734	0.00813126	0.294462	0.0276139	0.97797	0.986081
ENSMUSG00000004264	Phb2	601.846	443.335	512.269	512.269	445.136	551.548	655.053	593.13	539.323	-0.113935	0.165762	-0.687342	0.491867	0.612273
ENSMUSG00000004266	Ptpn6	2080.32	1576.07	1918.45	1918.45	1617.59	2337.09	1904.06	2333.93	1960.75	-0.125965	0.154779	-0.813837	0.415738	0.542948
ENSMUSG00000004267	Eno2	200.957	134.698	185.144	185.144	17.4875	91.9247	74.5809	76.2723	120.776	1.27615	0.358104	3.56362	0.000365776	0.00162586
ENSMUSG00000004268	Emg1	314.765	493.184	311.223	311.223	266.287	296.757	345.049	304.192	330.335	0.231735	0.19702	1.1762	0.239515	0.361486
ENSMUSG00000004270	Lpcat3	258.373	296.971	245.344	245.344	374.391	406.667	273.164	284.451	298.088	-0.345273	0.184936	-1.86699	0.0619034	0.124963
ENSMUSG00000004285	Atp6v1f	1163.71	1333.19	856.432	856.432	818.733	881.278	945.29	878.478	966.692	0.251162	0.168258	1.49272	0.13551	0.231934
ENSMUSG00000004317	Clcn5	93.3015	55.1518	113.585	113.585	359.289	253.792	244.41	173.183	175.787	-1.36163	0.278384	-4.89121	1.00217e-06	8.58463e-06
ENSMUSG00000004319	Clcn3	291.183	339.396	423.673	423.673	317.954	325.733	282.149	283.554	335.914	0.281402	0.172576	1.63059	0.102977	0.186737
ENSMUSG00000004356	Utp20	53.3152	117.728	73.8304	73.8304	96.9761	136.888	127.596	113.063	99.1533	-0.536047	0.274943	-1.94967	0.051216	0.107401
ENSMUSG00000004359	Spic	261.449	237.577	180.6	180.6	16.6926	81.9329	79.0737	40.3795	134.788	1.75216	0.359616	4.87232	1.10295e-06	9.38784e-06
ENSMUSG00000004364	Cul3	416.268	490.002	228.306	228.306	271.851	413.661	488.819	555.442	386.582	-0.320172	0.278518	-1.14956	0.250327	0.373431
ENSMUSG00000004393	Ddx56	428.572	291.668	270.333	270.333	235.286	153.874	173.423	182.156	250.706	0.729145	0.216795	3.36329	0.000770194	0.00308395
ENSMUSG00000004394	Tmed4	500.342	399.85	353.25	353.25	389.494	530.565	448.384	525.83	437.621	-0.230057	0.17608	-1.30654	0.191368	0.303233
ENSMUSG00000004446	Bid	122.01	70.0003	109.042	109.042	227.337	152.875	105.132	93.3214	123.595	-0.458404	0.303529	-1.51025	0.13098	0.226061
ENSMUSG00000004451	Ralb	769.994	853.792	757.613	757.613	851.323	910.254	867.115	829.125	824.604	-0.137801	0.10848	-1.27029	0.20398	0.318224
ENSMUSG00000004455	Ppp1cc	459.331	540.912	612.224	612.224	888.683	784.357	773.664	720.549	673.993	-0.501975	0.144224	-3.48052	0.000500438	0.00214425
ENSMUSG00000004460	Dnajb11	709.502	668.185	684.919	684.919	887.093	874.284	896.767	869.505	784.397	-0.357633	0.100386	-3.56258	0.000367226	0.00163027
ENSMUSG00000004462	Tbccd1	84.0739	74.2428	78.3738	78.3738	117.643	97.9198	75.4794	54.7366	82.6054	-0.126328	0.278063	-0.454315	0.649602	0.74759
ENSMUSG00000004500	Zfp324	3.07587	4.24244	36.3473	36.3473	15.1028	20.9828	20.667	17.9464	19.339	0.0647924	0.522607	0.123979	0.901332	0.934071
ENSMUSG00000004508	Gab2	339.372	248.183	449.797	449.797	556.42	526.569	486.123	603	457.408	-0.529388	0.200003	-2.6469	0.00812334	0.0233069
ENSMUSG00000004530	Coro1c	1478.47	1110.46	1344.85	1344.85	2649.36	1977.38	1493.41	1415.97	1601.84	-0.497211	0.198106	-2.50983	0.012079	0.0327592
ENSMUSG00000004535	Tax1bp1	2268.97	1787.13	1771.93	1771.93	1483.26	1304.93	1337.96	1517.37	1655.43	0.423657	0.128559	3.29542	0.000982744	0.00381924
ENSMUSG00000004561	Mettl17	97.4027	46.6669	80.6455	80.6455	73.9244	29.9754	31.4498	29.6116	58.7902	0.777278	0.363288	2.13957	0.0323899	0.0738417
ENSMUSG00000004562	Arhgef40	21.5311	5.30306	32.9397	32.9397	23.8466	43.964	62.0009	20.6384	30.3954	-0.544995	0.464265	-1.17389	0.24044	0.362523
ENSMUSG00000004565	Pnpla6	122.01	108.182	119.264	119.264	107.31	66.9452	98.8421	78.067	102.486	0.394814	0.23057	1.71234	0.0868343	0.164141
ENSMUSG00000004567	Mcoln1	854.068	998.035	787.145	787.145	572.318	449.632	437.601	416.357	662.788	0.851685	0.15414	5.5254	3.28734e-08	3.93414e-07
ENSMUSG00000004568	Arhgef18	42.037	11.6667	5.67926	5.67926	39.7443	55.9542	39.5368	37.6875	29.7481	-1.0601	0.479616	-2.21031	0.0270835	0.0640704
ENSMUSG00000004591	Pkn2	598.77	610.912	523.628	523.628	251.184	304.75	331.57	270.991	426.929	0.946059	0.149467	6.32957	2.45852e-10	4.34002e-09
ENSMUSG00000004609	Cd33	1021.19	905.762	1079.06	1079.06	1460.21	1154.05	877.897	877.581	1056.85	-0.0949845	0.179911	-0.527952	0.597532	0.705941
ENSMUSG00000004610	Etfb	190.704	177.122	134.03	134.03	117.643	122.899	115.915	111.268	137.952	0.429493	0.205608	2.0889	0.0367171	0.0816199
ENSMUSG00000004626	Stxbp2	763.842	588.639	611.088	611.088	546.882	695.43	618.212	605.692	630.109	0.0621039	0.14409	0.431008	0.666463	0.761316
ENSMUSG00000004631	Sgce	0	12.7273	13.6302	13.6302	9.53863	8.99263	0.898564	2.69196	7.7637	0.434422	0.559773	0.776069	0.437708	0.563316
ENSMUSG00000004633	Chn2	75.8716	15.9092	44.2982	44.2982	86.6426	40.9664	36.8411	41.2768	48.263	-0.160418	0.413452	-0.387997	0.698018	0.786067
ENSMUSG00000004637	Wwox	31.784	26.5153	54.5209	54.5209	62.0011	38.9681	44.0297	51.1473	45.4359	-0.211184	0.338662	-0.623586	0.5329	0.649828
ENSMUSG00000004642	Slbp	684.895	691.519	439.575	439.575	584.241	653.465	742.214	752.853	623.542	-0.267564	0.193385	-1.38358	0.166487	0.272877
ENSMUSG00000004655	Aqp1	5.12646	16.9698	6.81511	6.81511	219.389	16.9861	31.4498	17.9464	40.1872	-1.9464	0.52976	-3.67412	0.000238673	0.001119
ENSMUSG00000004661	Arid3b	47.1634	118.788	110.178	110.178	54.0523	53.9558	97.9435	66.4018	82.3326	0.455976	0.326285	1.39748	0.16227	0.267508
ENSMUSG00000004665	Cnn2	980.179	503.79	597.458	597.458	891.067	1030.16	868.013	1004.1	809.028	-0.48473	0.200073	-2.42277	0.0154027	0.0403609
ENSMUSG00000004667	Polr2e	698.224	554.7	437.303	437.303	353.724	460.623	472.645	406.487	477.626	0.320646	0.190313	1.68483	0.0920206	0.1717
ENSMUSG00000004677	Myo9b	447.027	422.123	639.484	639.484	674.063	763.375	875.202	730.42	648.897	-0.489725	0.179314	-2.7311	0.00631233	0.0188069
ENSMUSG00000004698	Hdac9	52.2899	43.4851	129.487	129.487	119.233	58.9517	34.1454	72.6831	79.9703	0.265437	0.399283	0.664782	0.50619	0.625372
ENSMUSG00000004707	Ly9	339.372	248.183	237.393	237.393	579.472	487.601	377.397	466.607	371.677	-0.821284	0.190918	-4.30177	1.69442e-05	0.000108424
ENSMUSG00000004709	Cd244	154.819	256.668	152.204	152.204	105.72	158.87	170.727	158.826	163.755	0.256832	0.248062	1.03536	0.300503	0.42822
ENSMUSG00000004730	Adgre1	1908.07	1839.1	2231.95	2231.95	5219.22	4550.27	3750.61	5133.58	3358.09	-1.1651	0.140418	-8.29734	1.06468e-16	5.08527e-15
ENSMUSG00000004771	Rab11a	1140.12	1237.73	1181.29	1181.29	1746.36	1215	1296.63	1365.72	1295.52	-0.243174	0.139066	-1.74862	0.0803568	0.154713
ENSMUSG00000004788	Eif2b2	211.21	340.456	213.54	213.54	191.568	126.896	149.162	122.933	196.163	0.693917	0.234615	2.95768	0.00309965	0.0102641
ENSMUSG00000004789	Dlst	778.196	469.851	1000.69	1000.69	697.115	622.49	654.155	651.455	734.329	0.295579	0.214264	1.37951	0.167738	0.274407
ENSMUSG00000004791	Pgf	35.8852	179.243	163.563	163.563	18.2824	60.9501	100.639	75.375	99.6876	0.891134	0.430726	2.06891	0.0385542	0.085061
ENSMUSG00000004798	Ulk2	171.224	159.092	197.638	197.638	490.445	428.649	378.296	321.241	293.028	-1.12635	0.184748	-6.09666	1.08307e-09	1.68426e-08
ENSMUSG00000004814	Ccl24	35.8852	82.7277	49.9775	49.9775	296.493	38.9681	30.5512	20.6384	75.6522	-0.593309	0.503129	-1.17924	0.238303	0.360063
ENSMUSG00000004815	Dgkq	61.5175	74.2428	48.8416	48.8416	54.0523	67.9443	33.2469	31.4063	52.5117	0.293944	0.332211	0.884811	0.376258	0.504396
ENSMUSG00000004837	Grap	17.43	48.7881	27.2604	27.2604	50.0778	42.9648	26.9569	24.2277	33.1208	-0.219907	0.395638	-0.555828	0.578329	0.689342
ENSMUSG00000004843	Chmp2b	285.031	135.758	266.925	266.925	364.058	540.557	496.008	480.964	354.528	-0.934174	0.233246	-4.0051	6.19924e-05	0.000339783
ENSMUSG00000004846	Plod3	289.132	312.88	383.918	383.918	444.341	591.515	655.053	559.031	452.474	-0.698339	0.174055	-4.01217	6.01621e-05	0.000331948
ENSMUSG00000004849	Ap1s1	585.442	987.429	467.971	467.971	409.366	292.76	329.773	376.875	489.698	0.792257	0.239784	3.30405	0.000952998	0.00371986
ENSMUSG00000004865	Srpk1	246.07	391.366	277.148	277.148	165.336	241.802	270.468	234.201	262.942	0.372703	0.214689	1.73602	0.0825611	0.158131
ENSMUSG00000004880	Lbr	287.082	276.82	303.272	303.272	592.985	454.628	540.037	508.781	408.36	-0.828271	0.142799	-5.80028	6.62062e-09	8.90994e-08
ENSMUSG00000004895	Prcc	4.10117	5.30306	7.95096	7.95096	28.6159	25.9787	35.9426	23.3304	17.3967	-1.75676	0.437485	-4.0156	5.92944e-05	0.00032802
ENSMUSG00000004896	Rrnad1	215.311	195.152	162.427	162.427	58.8216	58.9517	50.3196	61.0179	120.554	1.61915	0.214345	7.55394	4.22287e-14	1.36086e-12
ENSMUSG00000004897	Hdgf	920.712	812.428	675.832	675.832	732.885	717.412	794.331	775.286	763.09	0.0307067	0.141919	0.216367	0.828702	0.886008
ENSMUSG00000004929	Thop1	10.2529	0	70.4228	70.4228	147.054	123.898	77.2765	65.5045	70.604	-0.683668	0.559327	-1.2223	0.221593	0.340488
ENSMUSG00000004931	Apba3	376.282	423.184	271.469	271.469	195.542	206.831	222.844	194.719	270.292	0.690203	0.194678	3.54536	0.000392083	0.00173128
ENSMUSG00000004933	Matk	694.122	813.489	687.19	687.19	317.16	397.674	335.165	314.063	530.757	1.06315	0.140966	7.54185	4.63337e-14	1.4842e-12
ENSMUSG00000004934	Pias4	358.852	325.608	372.559	372.559	144.669	150.876	153.655	128.317	250.887	1.28233	0.154697	8.28927	1.13943e-16	5.41813e-15
ENSMUSG00000004936	Map2k1	681.819	583.336	841.666	841.666	725.731	821.327	774.563	751.058	752.646	-0.0586509	0.151672	-0.386695	0.698982	0.78687
ENSMUSG00000004937	Sgta	659.263	776.367	559.975	559.975	388.699	345.717	301.918	401.103	499.127	0.811287	0.166749	4.86533	1.14266e-06	9.67708e-06
ENSMUSG00000004945	Tmem242	123.035	156.97	131.759	131.759	143.079	90.9255	93.4507	122.036	124.127	0.259617	0.227263	1.14236	0.253303	0.376767
ENSMUSG00000004947	Dtx2	49.214	65.7579	146.525	146.525	85.0528	99.9181	97.9435	108.576	99.939	0.0521799	0.332873	0.156756	0.875437	0.917276
ENSMUSG00000004952	Rasa4	1768.63	1853.95	2228.54	2228.54	825.887	1095.1	1331.67	1461.74	1599.26	0.756314	0.181624	4.16417	3.12487e-05	0.000185224
ENSMUSG00000004980	Hnrnpa2b1	4512.31	4330.48	4585.43	4585.43	4039.61	4616.22	4767.78	4343.93	4472.65	0.0198001	0.0951759	0.208037	0.8352	0.890109
ENSMUSG00000004994	Ccdc130	127.136	40.3032	96.5474	96.5474	44.5136	64.9468	68.2909	64.6072	75.3616	0.51876	0.331867	1.56316	0.118016	0.208153
ENSMUSG00000004996	Mri1	215.311	356.365	212.404	212.404	114.464	142.883	126.698	114.857	186.923	0.956999	0.2266	4.2233	2.40752e-05	0.00014795
ENSMUSG00000005034	Prkacb	413.193	251.365	623.583	623.583	918.888	623.489	517.573	533.906	563.197	-0.413495	0.270925	-1.52623	0.126952	0.220389
ENSMUSG00000005043	Sgsh	27.6829	32.8789	87.4606	87.4606	194.747	153.874	166.234	174.08	115.552	-1.39613	0.336978	-4.14308	3.4267e-05	0.000201773
ENSMUSG00000005054	Cstb	4954.21	6163.21	3614.28	3614.28	3539.63	3924.78	4431.72	4175.24	4302.17	0.186031	0.179665	1.03543	0.300469	0.42822
ENSMUSG00000005057	Sh2b2	601.846	706.367	816.677	816.677	433.213	468.616	645.169	511.473	625.005	0.502404	0.171708	2.92592	0.00343442	0.0111822
ENSMUSG00000005069	Pex5	413.193	439.093	475.922	475.922	484.086	330.729	472.645	372.388	432.997	0.116069	0.166609	0.696656	0.486018	0.607253
ENSMUSG00000005078	Jkamp	62.5428	62.5761	128.351	128.351	147.849	171.859	156.35	138.188	124.508	-0.641721	0.280786	-2.28545	0.0222866	0.0548149
ENSMUSG00000005087	Cd44	4419.01	4635.93	5353.27	5353.27	4438.64	4344.44	5579.19	5068.97	4899.09	0.0239131	0.127291	0.187861	0.850985	0.901366
ENSMUSG00000005089	Slc1a2	0	6.36367	2.2717	2.2717	5.5642	23.9804	25.1598	17.9464	10.4447	-1.63074	0.544095	-2.99716	0.00272507	0.00917127
ENSMUSG00000005102	Eif2ak4	88.1751	140.001	122.672	122.672	85.0528	89.9263	98.8421	115.754	107.887	0.26841	0.232502	1.15444	0.248319	0.371315
ENSMUSG00000005103	Wdr1	2479.16	1597.28	2425.04	2425.04	3630.24	3740.94	3606.84	3588.39	2936.62	-0.693574	0.150232	-4.61668	3.89925e-06	2.91196e-05
ENSMUSG00000005107	Slc2a9	0	19.091	30.668	30.668	58.8216	35.9705	14.377	10.7679	25.0455	-0.363454	0.541692	-0.670962	0.502245	0.621288
ENSMUSG00000005124	Wisp1	0	7.42428	4.54341	4.54341	1.58977	14.9877	4.49282	6.28125	5.48283	-0.362329	0.559933	-0.647094	0.517571	0.636421
ENSMUSG00000005125	Ndrg1	911.484	792.277	1183.56	1183.56	476.932	703.424	798.824	679.272	841.166	0.596008	0.193657	3.07765	0.00208643	0.00730694
ENSMUSG00000005142	Man2b1	2228.98	1989.71	2525	2525	4261.38	3861.84	3287.85	3508.53	3023.54	-0.677326	0.131747	-5.14112	2.73106e-07	2.68316e-06
ENSMUSG00000005150	Wdr83	73.821	35.0002	71.5587	71.5587	69.1551	51.9574	68.2909	72.6831	64.2531	-0.0545925	0.300372	-0.181749	0.855779	0.904567
ENSMUSG00000005161	Prdx2	1086.81	921.671	917.768	917.768	940.35	1268.96	1337.06	1098.32	1061.09	-0.267617	0.1462	-1.83048	0.0671779	0.133718
ENSMUSG00000005198	Polr2a	60.4922	60.4548	77.2379	77.2379	324.314	327.732	359.426	324.83	201.466	-2.21867	0.182709	-12.1432	6.23616e-34	2.66883e-31
ENSMUSG00000005204	Senp3	180.451	247.122	218.084	218.084	197.132	236.806	229.134	218.049	218.108	-0.0274352	0.171787	-0.159705	0.873114	0.916048
ENSMUSG00000005225	Plekha8	0	26.5153	12.4944	12.4944	35.7699	49.9591	42.2325	34.0982	26.6955	-1.1839	0.503425	-2.35169	0.0186883	0.0472909
ENSMUSG00000005233	Spc25	31.784	43.4851	32.9397	32.9397	51.6676	32.973	40.4354	50.25	39.5593	-0.287976	0.316211	-0.910706	0.36245	0.491926
ENSMUSG00000005237	Dnah2	178.401	146.364	237.393	237.393	15.8977	36.9697	34.1454	39.4822	115.756	2.46363	0.295599	8.33436	7.79189e-17	3.87746e-15
ENSMUSG00000005262	Ufd1l	362.953	499.548	357.793	357.793	310.006	265.782	262.381	265.607	335.233	0.503154	0.170239	2.95557	0.00312094	0.0103314
ENSMUSG00000005267	Zfp287	34.8599	42.4244	18.1736	18.1736	5.5642	18.9844	26.9569	9.87054	21.876	0.693504	0.468408	1.48055	0.138725	0.236228
ENSMUSG00000005299	Letm1	239.918	389.244	336.212	336.212	407.777	377.691	373.803	408.281	358.642	-0.26239	0.173375	-1.51342	0.130172	0.224958
ENSMUSG00000005312	Ubqln1	867.397	431.669	641.756	641.756	898.221	1064.13	1089.06	1082.17	839.52	-0.657154	0.194373	-3.38089	0.00072252	0.00291817
ENSMUSG00000005354	Txn2	607.998	646.973	437.303	437.303	484.086	468.616	514.877	545.572	517.841	0.0797904	0.171769	0.464521	0.642275	0.742324
ENSMUSG00000005362	Crbn	211.21	180.304	201.046	201.046	203.491	164.865	168.93	174.08	188.121	0.152601	0.16967	0.899395	0.368442	0.49697
ENSMUSG00000005370	Msh6	49.214	164.395	114.721	114.721	145.464	168.862	186.901	147.161	136.43	-0.506801	0.300715	-1.68532	0.0919267	0.171585
ENSMUSG00000005371	Fbxo11	245.045	452.881	374.831	374.831	190.773	254.791	262.381	278.17	304.213	0.533167	0.214362	2.48722	0.0128745	0.0346439
ENSMUSG00000005374	Tbl2	56.391	71.061	47.7058	47.7058	127.977	86.9288	119.509	87.0402	80.5398	-0.863963	0.266513	-3.24173	0.00118807	0.0045075
ENSMUSG00000005378	Wbscr22	372.181	241.819	177.193	177.193	164.541	172.858	168.93	143.571	202.286	0.546116	0.251522	2.17125	0.0299126	0.0692103
ENSMUSG00000005410	Mcm5	141.49	204.698	107.906	107.906	189.183	194.84	237.221	269.196	181.555	-0.628656	0.246665	-2.54862	0.010815	0.0298451
ENSMUSG00000005413	Hmox1	905.333	657.579	1347.12	1347.12	3812.27	3008.54	2524.97	1878.09	1935.13	-1.32829	0.245147	-5.41834	6.01566e-08	6.78204e-07
ENSMUSG00000005417	Mprip	203.008	250.304	323.718	323.718	270.261	294.759	336.962	356.237	294.871	-0.187607	0.197223	-0.951243	0.341481	0.470752
ENSMUSG00000005442	Cic	51.2646	56.2124	111.313	111.313	202.696	213.825	253.395	244.969	155.624	-1.37975	0.27347	-5.04536	4.52678e-07	4.21514e-06
ENSMUSG00000005447	Pafah1b3	60.4922	45.6063	51.1133	51.1133	43.7187	45.9623	73.6823	44.8661	52.0693	0.00151296	0.298009	0.00507689	0.995949	0.997555
ENSMUSG00000005469	Prkaca	117.909	107.122	112.449	112.449	217.004	276.773	257.888	319.446	190.13	-1.21337	0.18942	-6.40572	1.49658e-10	2.76067e-09
ENSMUSG00000005470	Asf1b	88.1751	136.819	81.7813	81.7813	90.617	92.9239	89.8564	109.473	96.4284	0.0213456	0.249971	0.0853925	0.931949	0.955344
ENSMUSG00000005481	Ddx39	945.319	659.7	636.077	636.077	441.162	412.662	593.053	484.554	601.075	0.559361	0.183721	3.04462	0.00232978	0.00804248
ENSMUSG00000005483	Dnajb1	422.42	250.304	382.782	382.782	437.187	393.677	452.876	389.438	388.933	-0.212588	0.183274	-1.15995	0.246071	0.36883
ENSMUSG00000005501	Usp40	285.031	175.001	256.702	256.702	123.207	127.895	153.655	147.161	190.669	0.790147	0.20574	3.84051	0.000122778	0.000616714
ENSMUSG00000005506	Celf1	1265.21	1098.79	1439.12	1439.12	590.6	846.307	873.405	676.581	1028.64	0.794017	0.164779	4.81869	1.44506e-06	1.19387e-05
ENSMUSG00000005510	Ndufs3	329.119	432.729	278.284	278.284	292.518	269.779	274.062	322.138	309.614	0.18166	0.186335	0.974911	0.329604	0.458296
ENSMUSG00000005514	Por	2074.17	2324.86	2021.82	2021.82	875.964	1123.08	1073.78	893.732	1551.15	1.07604	0.127813	8.41888	3.80116e-17	1.95522e-15
ENSMUSG00000005533	Igf1r	66.644	61.5155	129.487	129.487	55.642	56.9533	67.3923	34.9955	75.2646	0.766102	0.328793	2.33005	0.0198038	0.0496601
ENSMUSG00000005534	Insr	110.731	252.425	224.899	224.899	192.362	159.869	179.713	184.848	191.218	0.170861	0.248057	0.688798	0.49095	0.611487
ENSMUSG00000005566	Trim28	118.934	128.334	118.129	118.129	280.595	298.755	363.919	332.009	219.85	-1.36524	0.170827	-7.99197	1.32797e-15	5.57175e-14
ENSMUSG00000005575	Ube2m	309.638	391.366	273.74	273.74	322.724	411.663	396.267	367.005	343.268	-0.25462	0.173858	-1.46453	0.14305	0.242021
ENSMUSG00000005580	Adcy9	27.6829	25.4547	15.9019	15.9019	27.0261	37.9689	21.5655	29.6116	25.1392	-0.384818	0.38279	-1.0053	0.314753	0.443565
ENSMUSG00000005583	Mef2c	759.741	753.034	854.16	854.16	1147.02	895.267	717.953	733.112	839.306	-0.11485	0.17075	-0.672619	0.50119	0.620485
ENSMUSG00000005609	Ctr9	34.8599	228.031	146.525	146.525	163.747	266.781	220.148	232.406	179.878	-0.586842	0.365205	-1.60689	0.10808	0.194115
ENSMUSG00000005610	Eif4g2	1363.64	1282.28	1601.55	1601.55	3800.35	4153.6	5035.56	4432.77	2908.91	-1.5521	0.133636	-11.6144	3.4831e-31	9.0892e-29
ENSMUSG00000005611	Mrvi1	0	0	1.13585	1.13585	35.7699	10.991	9.88421	0	7.3646	-1.55577	0.552832	-2.81418	0.00489024	0.0150795
ENSMUSG00000005615	Pcyt1a	1308.27	1336.37	1527.72	1527.72	1747.16	1472.79	1212.16	1112.68	1405.61	0.0386773	0.160614	0.240809	0.809703	0.872232
ENSMUSG00000005621	Zfp592	144.566	172.88	328.261	328.261	336.237	301.753	410.644	307.781	291.298	-0.450738	0.264961	-1.70115	0.0889153	0.167336
ENSMUSG00000005625	Psmd4	1328.78	1326.82	904.138	904.138	728.911	598.51	659.546	705.295	894.517	0.711897	0.17192	4.14086	3.46011e-05	0.000203182
ENSMUSG00000005656	Snx6	633.63	761.519	547.48	547.48	1430	942.228	863.52	796.822	815.335	-0.672134	0.202456	-3.3199	0.000900486	0.00354072
ENSMUSG00000005667	Mthfd2	77.9222	92.2732	96.5474	96.5474	117.643	140.885	168.032	210.871	125.09	-0.772391	0.239559	-3.22423	0.00126314	0.00475689
ENSMUSG00000005672	Kit	59.4669	22.2728	62.4718	62.4718	15.1028	29.9754	83.5665	71.7857	50.8892	0.0359294	0.441633	0.0813557	0.935159	0.957568
ENSMUSG00000005674	Tomm40l	47.1634	44.5457	52.2492	52.2492	36.5648	25.9787	27.8555	35.8929	40.3124	0.581183	0.302382	1.92202	0.0546033	0.113129
ENSMUSG00000005682	Pan2	228.64	111.364	147.661	147.661	87.4375	114.906	163.539	107.679	138.611	0.398173	0.274826	1.44882	0.147388	0.247668
ENSMUSG00000005683	Cs	520.848	435.911	546.345	546.345	928.427	842.31	957.87	904.5	710.319	-0.815781	0.127344	-6.4061	1.49289e-10	2.76067e-09
ENSMUSG00000005686	Ampd3	66.644	71.061	76.1021	76.1021	201.901	168.862	133.886	122.933	114.686	-1.0636	0.236653	-4.49434	6.97874e-06	4.86737e-05
ENSMUSG00000005687	Bcas2	767.943	793.337	703.092	703.092	505.548	416.659	524.762	518.652	616.636	0.585455	0.131341	4.45751	8.2916e-06	5.72704e-05
ENSMUSG00000005698	Ctcf	396.788	477.275	386.19	386.19	325.903	314.742	302.816	312.268	362.771	0.384699	0.140654	2.73508	0.0062366	0.0186176
ENSMUSG00000005699	Pard6a	38.9611	61.5155	31.8038	31.8038	50.8727	46.9615	57.5081	48.4554	45.9852	-0.283493	0.317393	-0.893193	0.371754	0.500302
ENSMUSG00000005732	Ranbp1	1079.63	1206.98	669.017	669.017	709.833	701.425	900.362	1011.28	868.443	0.120755	0.218846	0.55178	0.581099	0.691566
ENSMUSG00000005774	Rfx5	27.6829	43.4851	94.2757	94.2757	55.642	53.9558	32.3483	71.7857	59.1814	0.239814	0.387166	0.619409	0.535647	0.652127
ENSMUSG00000005779	Psmb4	474.71	547.275	596.322	596.322	632.729	485.602	598.444	672.991	575.55	-0.108817	0.152756	-0.712354	0.476246	0.598179
ENSMUSG00000005800	Mmp8	23.5817	20.1516	27.2604	27.2604	18.2824	30.9746	32.3483	16.1518	24.5014	0.00875936	0.38633	0.0226733	0.981911	0.988378
ENSMUSG00000005802	Slc30a4	7.17704	2.12122	32.9397	32.9397	22.2568	34.9713	20.667	24.2277	22.1626	-0.31509	0.509264	-0.618717	0.536103	0.652458
ENSMUSG00000005803	Sqrdl	145.591	178.183	163.563	163.563	316.365	301.753	159.944	236.893	208.232	-0.612571	0.231481	-2.64632	0.00813735	0.0233346
ENSMUSG00000005804	Bloc1s6	114.833	97.5762	70.4228	70.4228	158.977	105.913	115.016	116.652	106.227	-0.46396	0.254877	-1.82033	0.0687093	0.136386
ENSMUSG00000005813	Metap1	276.829	251.365	311.223	311.223	112.874	252.793	261.482	192.027	246.227	0.466235	0.24854	1.8759	0.0606692	0.123146
ENSMUSG00000005823	Gpr108	837.663	581.215	486.144	486.144	408.571	520.574	413.34	428.92	520.321	0.419849	0.198691	2.11307	0.0345945	0.0778886
ENSMUSG00000005824	Tnfsf14	212.235	130.455	205.589	205.589	112.874	119.902	78.1751	70.8884	141.963	0.92831	0.253324	3.66451	0.00024781	0.00115526
ENSMUSG00000005846	Rsl1d1	437.8	595.003	308.952	308.952	478.521	553.546	666.735	559.031	488.567	-0.432648	0.22131	-1.95494	0.0505901	0.106339
ENSMUSG00000005871	Apc	225.564	440.154	525.899	525.899	367.237	415.659	312.7	495.322	413.554	0.104131	0.251689	0.413729	0.679073	0.77152
ENSMUSG00000005873	Reep5	472.659	562.124	465.699	465.699	748.783	834.316	978.537	1067.81	699.454	-0.866813	0.15457	-5.60791	2.04787e-08	2.55066e-07
ENSMUSG00000005881	Ergic3	514.696	691.519	575.877	575.877	621.601	533.563	595.748	524.933	579.227	0.0497782	0.142532	0.349243	0.726907	0.808438
ENSMUSG00000005882	Uqcc1	18.4552	95.455	127.215	127.215	81.0784	113.907	93.4507	108.576	95.6691	-0.0932781	0.394821	-0.236254	0.813236	0.874805
ENSMUSG00000005886	Ncoa2	238.893	299.092	312.359	312.359	311.595	248.796	351.339	358.929	304.17	-0.126048	0.17921	-0.703351	0.481837	0.60358
ENSMUSG00000005893	Nr2c2	103.554	177.122	263.518	263.518	162.952	210.827	177.916	192.027	193.929	0.11083	0.272676	0.406455	0.684408	0.775769
ENSMUSG00000005897	Nr2c1	27.6829	96.5156	60.2001	60.2001	105.72	78.9353	88.0593	82.5536	74.9834	-0.488031	0.330874	-1.47498	0.140219	0.238241
ENSMUSG00000005899	Smpd4	141.49	127.273	127.215	127.215	155.003	172.858	155.452	166.902	146.676	-0.304227	0.176148	-1.72711	0.0841476	0.160138
ENSMUSG00000005907	Pex1	116.883	151.667	115.857	115.857	50.0778	62.9484	78.1751	58.3259	93.724	0.956786	0.241175	3.96719	7.27256e-05	0.000390216
ENSMUSG00000005936	Kctd20	581.34	295.911	435.031	435.031	613.652	674.447	674.822	649.661	544.987	-0.562359	0.19195	-2.92972	0.00339268	0.0110666
ENSMUSG00000005949	Ctns	266.576	381.82	233.985	233.985	426.854	307.748	308.208	346.366	313.193	-0.304392	0.207349	-1.46801	0.1421	0.240825
ENSMUSG00000005968	Tuft1	45.1128	14.8486	64.7435	64.7435	83.463	17.9853	44.9282	26.0223	45.2309	0.103665	0.452795	0.228944	0.818912	0.879673
ENSMUSG00000005981	Trap1	247.095	263.032	238.529	238.529	373.596	334.726	405.253	433.406	316.771	-0.636309	0.15018	-4.23697	2.26556e-05	0.000140192
ENSMUSG00000005982	Naa60	221.463	261.971	402.091	402.091	441.957	465.619	391.774	363.415	368.798	-0.355594	0.215819	-1.64765	0.099424	0.181835
ENSMUSG00000005986	Ankrd13d	85.0992	40.3032	38.619	38.619	29.4108	53.9558	56.6096	30.5089	46.6407	0.222689	0.371002	0.600237	0.548348	0.663512
ENSMUSG00000006005	Tpr	994.533	992.732	709.907	709.907	998.377	1007.17	1132.19	1142.29	960.889	-0.321888	0.157885	-2.03875	0.0414745	0.0901903
ENSMUSG00000006010	BC003331	120.984	199.395	214.676	214.676	290.928	218.821	283.946	296.116	229.943	-0.520136	0.218743	-2.37784	0.0174142	0.0446105
ENSMUSG00000006014	Prg4	47.1634	40.3032	78.3738	78.3738	59.6165	659.46	115.915	72.6831	143.986	-1.20909	0.536525	-2.25356	0.0242239	0.0586892
ENSMUSG00000006019	Dhx34	180.451	154.849	186.28	186.28	220.183	176.855	138.379	177.67	177.618	-0.0118454	0.199478	-0.0593818	0.952648	0.96941
ENSMUSG00000006021	Kptn	103.554	120.91	112.449	112.449	73.9244	50.9583	76.378	79.8616	91.3106	0.642989	0.233599	2.75253	0.00591366	0.0177626
ENSMUSG00000006024	Napa	3009.23	2914.56	2392.1	2392.1	1100.12	1245.98	1247.21	1110.88	1926.52	1.17172	0.126594	9.25571	2.12819e-20	1.68663e-18
ENSMUSG00000006050	Sra1	1075.53	908.944	932.534	932.534	416.52	487.601	546.327	559.031	732.378	0.923535	0.140594	6.56881	5.07175e-11	1.02965e-09
ENSMUSG00000006057	Atp5g1	737.185	902.58	564.518	564.518	527.009	503.587	617.314	540.188	619.612	0.330987	0.179726	1.84162	0.0655312	0.131124
ENSMUSG00000006058	Snf8	167.123	248.183	248.751	248.751	207.465	262.785	215.655	276.375	234.386	-0.0736882	0.198239	-0.371713	0.710106	0.796077
ENSMUSG00000006095	Tbcb	655.161	705.306	444.118	444.118	625.575	546.552	492.413	437.893	543.892	0.0942027	0.198401	0.474809	0.634923	0.736692
ENSMUSG00000006127	Inpp5k	638.757	609.851	648.571	648.571	712.218	584.521	603.835	463.915	613.78	0.1039	0.152915	0.679466	0.496842	0.616673
ENSMUSG00000006134	Crkl	194.805	126.213	201.046	201.046	362.468	302.752	314.498	256.634	244.933	-0.748344	0.204042	-3.6676	0.000244841	0.00114341
ENSMUSG00000006169	Clint1	750.513	537.73	730.353	730.353	887.888	937.232	971.348	941.29	810.838	-0.436308	0.139975	-3.11704	0.0018268	0.00651171
ENSMUSG00000006191	Cdkal1	323.992	284.244	340.755	340.755	205.875	148.878	141.075	137.29	240.358	0.99423	0.188147	5.28432	1.26173e-07	1.33921e-06
ENSMUSG00000006205	Htra1	72.7957	82.7277	79.5096	79.5096	15.1028	98.919	110.523	126.522	83.2013	-0.131584	0.411364	-0.319874	0.749064	0.82604
ENSMUSG00000006215	Zbtb17	417.294	288.486	353.25	353.25	156.593	211.826	168.93	139.085	261.089	1.03111	0.193672	5.32397	1.01524e-07	1.09607e-06
ENSMUSG00000006219	Fblim1	136.364	180.304	162.427	162.427	185.208	205.831	191.394	162.415	173.296	-0.209391	0.182422	-1.14783	0.251037	0.374276
ENSMUSG00000006235	Epor	17.43	12.7273	3.40755	3.40755	16.6926	5.99509	7.18852	0.897322	8.46824	0.151958	0.553193	0.274693	0.783552	0.852473
ENSMUSG00000006262	Mob1b	208.134	308.638	291.914	291.914	284.569	191.843	322.585	313.165	276.595	-0.0159029	0.211891	-0.0750523	0.940173	0.960776
ENSMUSG00000006273	Atp6v1b2	2258.72	2644.1	2164.93	2164.93	3379.06	2818.69	2602.24	2186.77	2527.43	-0.246352	0.151094	-1.63045	0.103005	0.186757
ENSMUSG00000006276	Eps15l1	132.263	148.486	196.502	196.502	133.541	213.825	227.337	189.335	179.724	-0.173046	0.231671	-0.746948	0.455095	0.578548
ENSMUSG00000006281	Tep1	416.268	611.973	582.692	582.692	648.627	603.506	503.196	525.83	559.348	-0.0557743	0.166428	-0.335125	0.737531	0.816688
ENSMUSG00000006288	Ttc5	257.348	229.092	165.834	165.834	232.107	225.815	166.234	145.366	198.454	0.0852744	0.233564	0.365101	0.715036	0.799808
ENSMUSG00000006289	Osgep	604.922	502.73	299.865	299.865	381.545	389.681	448.384	383.156	413.768	0.0880139	0.231751	0.379777	0.704111	0.791145
ENSMUSG00000006299	Aamp	1333.9	973.641	818.949	818.949	901.401	952.22	990.218	1013.08	975.295	0.03247	0.171916	0.188871	0.850194	0.901241
ENSMUSG00000006301	Tmbim1	3137.39	3185.02	2992.97	2992.97	1347.33	1207.01	1419.73	1424.05	2213.31	1.17917	0.100837	11.6939	1.3701e-31	3.66469e-29
ENSMUSG00000006304	Arpc2	4689.68	4012.29	3842.59	3842.59	5155.63	4949.94	5212.57	5570.57	4659.48	-0.346813	0.107545	-3.22482	0.00126051	0.00474867
ENSMUSG00000006307	Kmt2b	64.5934	114.546	95.4115	95.4115	60.4113	61.9492	87.1608	68.1964	80.96	0.388322	0.266235	1.45857	0.144683	0.24412
ENSMUSG00000006310	Zbtb32	99.4533	77.4246	161.291	161.291	55.642	24.9795	25.1598	43.0714	81.0391	1.56017	0.340357	4.58392	4.56329e-06	3.33944e-05
ENSMUSG00000006315	Tmem147	300.41	295.911	278.284	278.284	177.26	222.817	184.206	225.228	245.3	0.501188	0.161061	3.11179	0.00185957	0.00660323
ENSMUSG00000006333	Rps9	2075.19	1984.4	1702.64	1702.64	2134.27	2506.95	2489.92	2934.24	2191.28	-0.424507	0.13549	-3.13313	0.00172953	0.0062199
ENSMUSG00000006335	Tfpt	97.4027	46.6669	78.3738	78.3738	94.5914	79.9345	45.8268	61.9152	72.8856	0.0831772	0.313621	0.265216	0.790843	0.858194
ENSMUSG00000006344	Ggt5	63.5681	118.788	12.4944	12.4944	34.975	63.9476	70.088	41.2768	52.2041	-0.0129457	0.484106	-0.0267413	0.978666	0.986318
ENSMUSG00000006356	Crip2	104.58	74.2428	86.3247	86.3247	124.797	53.9558	31.4498	25.125	73.35	0.489645	0.398839	1.22767	0.219569	0.337961
ENSMUSG00000006360	Crip1	5770.34	8552.77	4125.41	4125.41	9501.27	3637.02	2498.91	3705.94	5239.63	0.187008	0.411261	0.454719	0.649311	0.74755
ENSMUSG00000006362	Cbfa2t3	69.7198	55.1518	46.5699	46.5699	81.8733	74.9386	93.4507	87.9375	69.5264	-0.595931	0.257284	-2.31623	0.0205455	0.0512218
ENSMUSG00000006373	Pgrmc1	346.549	277.88	304.408	304.408	631.934	470.614	544.53	582.362	432.836	-0.838679	0.152245	-5.50873	3.61439e-08	4.28243e-07
ENSMUSG00000006378	Gcat	20.5058	41.3638	34.0755	34.0755	29.4108	9.99181	14.377	19.7411	25.4427	0.681806	0.411709	1.65604	0.0977135	0.179598
ENSMUSG00000006390	Elovl1	727.957	894.095	528.171	528.171	644.653	714.415	699.982	699.014	679.557	-0.0404265	0.18494	-0.218593	0.826967	0.884684
ENSMUSG00000006392	Med8	309.638	388.184	341.891	341.891	245.62	248.796	231.83	296.116	300.496	0.425692	0.157128	2.70919	0.00674469	0.0198464
ENSMUSG00000006395	Hyi	65.6187	108.182	42.0265	42.0265	46.1034	41.9656	30.5512	72.6831	56.1447	0.377553	0.371784	1.01552	0.309859	0.43811
ENSMUSG00000006398	Cdc20	30.7587	58.3336	20.4453	20.4453	83.463	28.9763	26.9569	49.3527	39.8415	-0.444046	0.427464	-1.03879	0.298902	0.426962
ENSMUSG00000006411	Nectin4	50.2393	11.6667	26.1246	26.1246	100.951	76.937	85.3636	71.7857	56.149	-1.36367	0.364503	-3.74119	0.000183153	0.000881093
ENSMUSG00000006412	Pfdn2	286.056	320.305	171.514	171.514	224.953	230.811	233.627	280.862	239.955	-0.0286451	0.235641	-0.121563	0.903245	0.93551
ENSMUSG00000006418	Rnf114	981.204	662.882	938.213	938.213	745.603	669.452	670.329	886.554	811.556	0.238609	0.166251	1.43523	0.151221	0.252997
ENSMUSG00000006423	C330007P06Rik	144.566	91.2126	325.989	325.989	320.339	448.632	367.513	302.397	290.83	-0.633452	0.323307	-1.95929	0.050079	0.105481
ENSMUSG00000006442	Srm	166.097	253.486	151.068	151.068	162.952	189.844	266.874	134.598	184.498	-0.0590594	0.260436	-0.226771	0.820602	0.880993
ENSMUSG00000006456	Rbm14	140.465	160.152	141.981	141.981	278.21	238.804	338.759	279.964	215.04	-0.933587	0.178253	-5.23743	1.62829e-07	1.68157e-06
ENSMUSG00000006463	Zdhhc24	33.8346	110.304	60.2001	60.2001	76.3091	65.946	46.7254	53.8393	63.4198	0.109398	0.348247	0.31414	0.753415	0.829384
ENSMUSG00000006471	Ndor1	168.148	313.941	374.831	374.831	85.8477	138.886	146.466	120.241	215.399	1.24446	0.26956	4.61663	3.90021e-06	2.91196e-05
ENSMUSG00000006476	Nsmf	133.288	165.455	222.627	222.627	131.156	102.916	104.233	98.7054	147.626	0.730423	0.23174	3.1519	0.00162211	0.00589904
ENSMUSG00000006494	Pdk1	278.879	295.911	227.17	227.17	346.57	302.752	333.367	307.781	289.95	-0.319137	0.16087	-1.98382	0.0472759	0.100658
ENSMUSG00000006498	Ptbp1	741.286	811.368	975.697	975.697	1299.64	1387.86	1400.86	1340.6	1116.63	-0.623531	0.12947	-4.81604	1.46433e-06	1.207e-05
ENSMUSG00000006517	Mvd	110.731	149.546	110.178	110.178	85.8477	94.9222	130.292	78.9643	108.832	0.287347	0.243716	1.17902	0.23839	0.360087
ENSMUSG00000006519	Cyba	6557.77	7457.16	4053.85	4053.85	3011.03	3447.18	3292.34	4032.56	4488.22	0.659407	0.203403	3.24187	0.00118748	0.00450685
ENSMUSG00000006526	Tmem110	222.488	97.5762	123.808	123.808	125.592	157.871	180.611	250.353	160.263	-0.306304	0.290449	-1.05459	0.291614	0.419126
ENSMUSG00000006527	Sfmbt1	332.194	340.456	438.439	438.439	220.183	220.819	212.061	212.665	301.907	0.820825	0.162833	5.0409	4.63346e-07	4.29951e-06
ENSMUSG00000006585	Cdt1	720.78	377.578	504.318	504.318	286.159	236.806	285.744	271.888	398.449	0.93067	0.202024	4.60673	4.09048e-06	3.03285e-05
ENSMUSG00000006589	Aprt	1496.93	1933.49	1500.46	1500.46	999.967	925.242	1062.1	1070.5	1311.14	0.655154	0.130944	5.0033	5.63574e-07	5.11423e-06
ENSMUSG00000006599	Gtf2h1	408.066	432.729	456.612	456.612	489.65	388.682	451.978	383.156	433.436	0.0318545	0.142855	0.222985	0.823547	0.882613
ENSMUSG00000006611	Hfe	612.099	792.277	554.296	554.296	813.963	934.235	699.083	757.339	714.698	-0.34249	0.163876	-2.08993	0.0366243	0.0814982
ENSMUSG00000006641	Slc5a6	87.1498	0	23.8529	23.8529	50.8727	21.982	27.8555	18.8438	31.8012	0.108296	0.542554	0.199605	0.84179	0.894104
ENSMUSG00000006673	Qrich1	711.552	754.095	640.62	640.62	640.678	722.408	876.999	632.612	702.448	-0.062907	0.149439	-0.420955	0.673788	0.7669
ENSMUSG00000006676	Usp19	428.572	312.88	678.103	678.103	639.883	587.519	570.588	547.366	555.377	-0.154682	0.229041	-0.675344	0.499457	0.619067
ENSMUSG00000006678	Pola1	183.527	128.334	138.574	138.574	63.5909	131.892	114.118	97.8081	124.552	0.505327	0.259087	1.95041	0.051127	0.107256
ENSMUSG00000006699	Cdc42	6336.3	5545.94	5696.3	5696.3	9044.21	8726.85	9061.12	9076.41	7397.93	-0.621681	0.0875298	-7.10251	1.22509e-12	3.2047e-11
ENSMUSG00000006705	Pknox1	253.247	246.062	243.072	243.072	270.261	226.814	241.714	249.455	246.712	-0.00502679	0.147471	-0.0340867	0.972808	0.983087
ENSMUSG00000006715	Gmnn	30.7587	73.1822	51.1133	51.1133	96.9761	119.902	107.828	142.674	84.1934	-1.09581	0.28937	-3.78688	0.000152548	0.000747987
ENSMUSG00000006717	Acot13	151.743	306.517	98.8191	98.8191	120.823	219.82	132.089	162.415	161.381	0.0435067	0.337035	0.129087	0.897289	0.930873
ENSMUSG00000006728	Cdk4	730.008	690.458	748.526	748.526	608.883	641.474	678.416	598.514	680.601	0.205156	0.111907	1.83327	0.0667618	0.133088
ENSMUSG00000006731	B4galnt1	845.866	521.821	663.337	663.337	973.735	1386.86	1287.64	1225.74	946.043	-0.833261	0.174832	-4.76606	1.87867e-06	1.51014e-05
ENSMUSG00000006732	Mettl1	43.0622	37.1214	24.9887	24.9887	23.8466	27.9771	27.8555	43.0714	31.614	0.0782148	0.362237	0.215921	0.829049	0.886067
ENSMUSG00000006736	Tspan31	549.556	389.244	381.646	381.646	617.626	567.535	567.893	602.103	507.156	-0.458139	0.159993	-2.8635	0.0041899	0.0132196
ENSMUSG00000006740	Kif5b	952.496	1027.73	1037.03	1037.03	1055.61	1123.08	1052.22	1133.32	1052.31	-0.1054	0.100449	-1.04929	0.294046	0.421603
ENSMUSG00000006763	Saal1	20.5058	89.0913	59.0643	59.0643	75.5142	60.9501	54.8124	73.5804	61.5728	-0.19343	0.363676	-0.531876	0.594812	0.703581
ENSMUSG00000006782	Cnp	281.955	301.214	333.94	333.94	401.417	349.713	324.382	335.598	332.77	-0.171962	0.148907	-1.15483	0.248159	0.371129
ENSMUSG00000006800	Sulf2	611.074	453.942	619.039	619.039	1645.41	1263.96	1086.36	979.875	909.839	-1.08007	0.186247	-5.79914	6.66555e-09	8.95913e-08
ENSMUSG00000006818	Sod2	582.366	625.761	430.488	430.488	778.193	668.452	762.881	915.268	649.237	-0.57956	0.17425	-3.32603	0.00088091	0.00347229
ENSMUSG00000006850	Tmco6	201.982	159.092	114.721	114.721	30.2057	35.9705	17.9713	52.0447	90.8385	1.92194	0.324216	5.92796	3.0673e-09	4.37908e-08
ENSMUSG00000006906	Stambp	125.086	166.516	229.442	229.442	98.5659	105.913	106.031	138.188	149.898	0.703383	0.245885	2.86062	0.00422809	0.0133205
ENSMUSG00000006920	Ezh1	230.691	266.213	249.887	249.887	207.465	204.832	177.017	216.255	225.281	0.300621	0.15763	1.90714	0.0565031	0.116277
ENSMUSG00000006932	Ctnnb1	606.973	579.094	1188.1	1188.1	1288.51	1282.95	1136.68	938.598	1026.13	-0.365296	0.240077	-1.52158	0.128114	0.221939
ENSMUSG00000006941	Eif1b	255.298	358.487	281.691	281.691	365.648	348.714	351.339	350.853	324.215	-0.261896	0.156135	-1.67737	0.0934696	0.173611
ENSMUSG00000006998	Psmd2	1496.93	960.914	1121.09	1121.09	1716.16	1386.86	1404.46	1432.13	1329.95	-0.330852	0.158119	-2.09242	0.0364012	0.0811538
ENSMUSG00000007029	Vars	241.969	270.456	244.208	244.208	488.855	572.531	664.039	692.732	427.375	-1.2458	0.159621	-7.80474	5.96236e-15	2.25411e-13
ENSMUSG00000007036	Abhd16a	278.879	276.82	357.793	357.793	251.184	218.821	212.96	204.589	269.855	0.504309	0.170995	2.94927	0.00318525	0.0104891
ENSMUSG00000007038	Neu1	2957.97	2136.07	2501.15	2501.15	1059.58	1210.01	1243.61	1112.68	1840.28	1.11067	0.131134	8.46978	2.45865e-17	1.30223e-15
ENSMUSG00000007039	Ddah2	26.6576	57.273	47.7058	47.7058	65.1807	23.9804	66.4938	34.0982	46.1369	-0.0746725	0.38016	-0.196424	0.844278	0.896302
ENSMUSG00000007041	Clic1	2467.88	2302.59	2134.27	2134.27	3080.98	2945.59	3059.61	3238.43	2670.45	-0.443677	0.098606	-4.49949	6.81172e-06	4.76331e-05
ENSMUSG00000007050	Lsm2	92.2762	88.0307	60.2001	60.2001	103.335	103.915	95.2478	104.987	88.524	-0.41402	0.242999	-1.70379	0.0884198	0.16655
ENSMUSG00000007080	Pole	36.9105	28.6365	30.668	30.668	60.4113	40.9664	35.044	46.6607	38.7457	-0.482934	0.321611	-1.50161	0.133198	0.228867
ENSMUSG00000007338	Mrpl49	80.998	119.849	82.9172	82.9172	77.1039	90.9255	109.625	103.192	93.441	-0.0504552	0.244952	-0.20598	0.836806	0.890845
ENSMUSG00000007379	Dennd2c	28.7082	16.9698	74.9662	74.9662	64.3858	46.9615	44.0297	53.8393	50.6033	-0.0855617	0.405049	-0.211238	0.832702	0.888509
ENSMUSG00000007411	Mark3	1548.19	1138.04	1226.72	1226.72	469.778	510.582	603.835	616.46	917.54	1.20111	0.152136	7.89496	2.90411e-15	1.14653e-13
ENSMUSG00000007415	Gatad1	13.3288	30.7577	36.3473	36.3473	46.8983	63.9476	86.2622	68.1964	47.7607	-1.05196	0.35485	-2.96453	0.00303145	0.0100612
ENSMUSG00000007458	M6pr	3650.04	2878.5	3046.35	3046.35	2069.09	3407.21	3799.13	3548.01	3180.59	-0.022127	0.182771	-0.121064	0.90364	0.935648
ENSMUSG00000007564	Ppp2r1a	1086.81	898.338	929.127	929.127	1158.94	1279.95	1178.02	1044.48	1063.1	-0.274552	0.122422	-2.24266	0.0249186	0.0600189
ENSMUSG00000007570	Fance	83.0486	129.395	71.5587	71.5587	82.6682	100.917	76.378	90.6295	88.2692	0.0214217	0.267305	0.0801394	0.936126	0.958144
ENSMUSG00000007589	Tinf2	685.92	634.246	772.379	772.379	152.618	252.793	255.192	233.304	469.854	1.63478	0.185181	8.82801	1.06557e-18	6.7459e-17
ENSMUSG00000007591	Tssk4	11.2782	0	2.2717	2.2717	7.94886	2.99754	4.49282	0	3.90761	0.0133531	0.544033	0.0245446	0.980418	0.987561
ENSMUSG00000007603	Dus3l	401.914	296.971	188.551	188.551	158.977	156.871	132.988	118.446	205.409	0.870939	0.261861	3.32596	0.000881136	0.00347229
ENSMUSG00000007610	Gtpbp3	2.05058	70.0003	30.668	30.668	43.7187	19.9836	38.6383	29.6116	33.1674	0.00964199	0.503385	0.0191543	0.984718	0.990365
ENSMUSG00000007613	Tgfbr1	493.165	498.487	723.537	723.537	954.658	1377.87	1131.29	1440.2	917.844	-0.977933	0.190775	-5.12611	2.95797e-07	2.88227e-06
ENSMUSG00000007617	Homer1	128.161	169.698	315.767	315.767	193.157	146.88	147.365	104.987	190.223	0.597858	0.298916	2.00009	0.0454908	0.0973997
ENSMUSG00000007655	Cav1	259.399	301.214	403.227	403.227	856.092	468.616	711.663	718.755	515.274	-0.973662	0.214904	-4.53068	5.87949e-06	4.19614e-05
ENSMUSG00000007656	Arpp19	856.119	1133.79	675.832	675.832	376.776	506.585	424.122	468.402	639.683	0.88487	0.193364	4.5762	4.73506e-06	3.45569e-05
ENSMUSG00000007659	Bcl2l1	483.938	387.123	515.677	515.677	337.032	342.719	307.309	292.527	397.75	0.56098	0.152793	3.67151	0.00024112	0.001128
ENSMUSG00000007670	Khsrp	65.6187	47.7275	102.227	102.227	226.543	340.721	378.296	430.714	211.759	-1.97978	0.27486	-7.20288	5.89554e-13	1.6215e-11
ENSMUSG00000007721	Ccdc124	415.243	461.366	260.11	260.11	290.928	322.736	278.555	292.527	322.697	0.229635	0.215342	1.06637	0.286256	0.412979
ENSMUSG00000007739	Cct4	621.327	618.336	697.413	697.413	879.939	871.286	911.144	884.759	772.702	-0.425483	0.109776	-3.87592	0.000106223	0.00054198
ENSMUSG00000007777	0610009B22Rik	132.263	141.061	57.9284	57.9284	133.541	82.9321	97.9435	109.473	101.634	-0.111098	0.324676	-0.342182	0.732214	0.812735
ENSMUSG00000007812	Zfp655	939.167	609.851	737.168	737.168	627.96	622.49	827.578	654.147	719.441	0.142884	0.169036	0.845287	0.397951	0.526484
ENSMUSG00000007815	Rhoa	2197.2	2213.5	2827.13	2827.13	3743.91	3365.24	3194.4	3269.84	2954.79	-0.425698	0.131181	-3.24513	0.00117397	0.0044669
ENSMUSG00000007817	Zmiz1	601.846	539.851	772.379	772.379	958.633	1359.89	1249.9	1110.88	920.72	-0.781806	0.169916	-4.60113	4.20211e-06	3.10271e-05
ENSMUSG00000007827	Ankrd26	48.1887	106.061	57.9284	57.9284	28.6159	43.964	25.1598	37.6875	50.6917	0.895975	0.341347	2.62482	0.00866945	0.0246687
ENSMUSG00000007833	Aldh16a1	336.296	276.82	375.967	375.967	311.595	395.676	349.542	330.214	344.01	-0.0221934	0.163918	-0.135393	0.892301	0.928399
ENSMUSG00000007836	Hnrnpa0	37.9358	25.4547	63.6077	63.6077	95.3863	159.869	139.277	91.5268	84.5832	-1.22519	0.326375	-3.75394	0.000174078	0.00084198
ENSMUSG00000007837	Prrg2	69.7198	116.667	68.1511	68.1511	46.8983	45.9623	49.421	58.3259	65.4121	0.638788	0.284999	2.24137	0.0250023	0.0601662
ENSMUSG00000007850	Hnrnph1	1018.11	1025.61	1575.43	1575.43	919.683	1097.1	1188.8	1073.2	1184.17	0.27205	0.182086	1.49408	0.135155	0.231365
ENSMUSG00000007867	Ift43	26.6576	30.7577	21.5812	21.5812	15.8977	15.9869	35.9426	15.2545	22.9574	0.233226	0.409723	0.569229	0.569201	0.681805
ENSMUSG00000007872	Id3	934.041	677.731	706.5	706.5	436.392	471.614	469.051	634.406	629.529	0.574778	0.172174	3.33836	0.00084274	0.00334067
ENSMUSG00000007880	Arid1a	107.656	175.001	145.389	145.389	329.878	403.669	416.035	445.072	271.011	-1.43043	0.193066	-7.409	1.27254e-13	3.83519e-12
ENSMUSG00000007891	Ctsd	6280.94	8174.13	6377.81	6377.81	8204.81	10308.6	7901.98	6861.82	7560.98	-0.284858	0.151832	-1.87614	0.0606354	0.123124
ENSMUSG00000007892	Rplp1	840.739	1272.73	820.085	820.085	855.297	757.38	879.695	1005.9	906.489	0.099077	0.177114	0.559398	0.57589	0.687432
ENSMUSG00000007950	Abhd8	32.8093	58.3336	24.9887	24.9887	31.0006	39.9673	26.9569	21.5357	32.5726	0.211447	0.38308	0.551966	0.580972	0.69155
ENSMUSG00000007987	Ift22	151.743	184.546	153.34	153.34	129.566	124.898	141.973	153.442	149.106	0.219315	0.185937	1.17951	0.238194	0.360014
ENSMUSG00000008035	Mid1ip1	331.169	323.486	174.921	174.921	219.389	225.815	153.655	167.799	221.394	0.368603	0.26034	1.41585	0.156819	0.260488
ENSMUSG00000008036	Ap2s1	895.08	1042.58	732.624	732.624	813.963	730.402	718.852	744.777	801.363	0.174885	0.150227	1.16413	0.24437	0.366949
ENSMUSG00000008140	Emc10	240.944	269.395	213.54	213.54	287.749	306.749	275.859	315.857	265.454	-0.331631	0.156825	-2.11466	0.0344592	0.0776166
ENSMUSG00000008167	Fbxw9	45.1128	114.546	89.7323	89.7323	60.4113	62.9484	41.334	78.067	72.7355	0.437903	0.321467	1.3622	0.173134	0.281129
ENSMUSG00000008200	Fnbp4	837.663	942.883	1172.2	1172.2	403.802	386.683	584.965	582.362	760.345	1.04306	0.189613	5.50098	3.77685e-08	4.43076e-07
ENSMUSG00000008226	Scrn3	30.7587	3.18183	57.9284	57.9284	46.1034	40.9664	29.6526	37.6875	38.0259	-0.0352419	0.477871	-0.0737477	0.941211	0.961338
ENSMUSG00000008301	Phax	215.311	132.576	170.378	170.378	182.824	168.862	178.814	209.973	178.64	-0.10104	0.201266	-0.502022	0.615652	0.721779
ENSMUSG00000008305	Tle1	407.041	203.637	186.28	186.28	217.004	302.752	279.454	373.286	269.467	-0.236496	0.272472	-0.867966	0.385413	0.513516
ENSMUSG00000008307	1700109H08Rik	24.607	11.6667	29.5321	29.5321	3.17954	5.99509	19.7684	18.8438	17.8906	0.730712	0.494854	1.47662	0.139777	0.237566
ENSMUSG00000008318	Relt	70.7451	108.182	74.9662	74.9662	217.004	236.806	219.25	218.946	152.608	-1.3887	0.204491	-6.79098	1.11378e-11	2.53539e-10
ENSMUSG00000008333	Snrpb2	292.208	347.88	210.133	210.133	217.799	272.777	266.874	244.969	257.846	0.0799133	0.207299	0.385497	0.699869	0.787543
ENSMUSG00000008348	Ubc	3573.14	3204.11	2564.75	2564.75	3979.99	3157.41	3427.12	3845.92	3289.65	-0.270472	0.146825	-1.84214	0.0654544	0.131039
ENSMUSG00000008373	Prpf31	385.51	441.214	283.963	283.963	356.109	304.75	308.208	331.112	336.854	0.0987051	0.186397	0.529543	0.596428	0.705179
ENSMUSG00000008384	Sertad1	777.171	741.367	860.976	860.976	1339.38	961.213	1114.22	1055.25	963.819	-0.457529	0.140013	-3.26776	0.00108402	0.00416592
ENSMUSG00000008393	Carhsp1	397.813	494.245	356.657	356.657	442.752	412.662	389.078	355.339	400.651	0.0051542	0.162791	0.0316615	0.974742	0.984342
ENSMUSG00000008398	Elk3	297.335	372.275	429.352	429.352	534.163	527.568	628.995	665.813	485.606	-0.611262	0.167632	-3.64646	0.000265882	0.00123039
ENSMUSG00000008429	Herpud2	253.247	264.092	332.805	332.805	568.344	635.479	518.472	537.496	430.342	-0.915875	0.156941	-5.8358	5.35316e-09	7.30529e-08
ENSMUSG00000008435	Rdh13	21.5311	64.6973	76.1021	76.1021	52.4625	47.9607	53.0153	70.8884	57.8449	0.0751926	0.361227	0.208159	0.835105	0.890096
ENSMUSG00000008450	Nutf2	141.49	149.546	104.498	104.498	96.9761	117.903	145.567	129.214	123.712	0.0312272	0.231234	0.135045	0.892576	0.928505
ENSMUSG00000008475	Arpc5	5671.91	4701.69	4452.54	4452.54	5851.95	5352.61	5460.58	5705.17	5206.12	-0.212275	0.114013	-1.86184	0.0626252	0.126253
ENSMUSG00000008496	Pou2f2	46.1381	64.6973	54.5209	54.5209	76.3091	94.9222	81.7694	159.723	79.0751	-0.838028	0.298585	-2.80667	0.00500569	0.015394
ENSMUSG00000008540	Mgst1	208.134	442.275	141.981	141.981	485.675	179.853	178.814	139.085	239.725	-0.064493	0.380201	-0.169629	0.865302	0.911576
ENSMUSG00000008604	Ubqln4	57.4163	138.94	97.6832	97.6832	106.515	145.88	176.119	201	127.655	-0.634396	0.291074	-2.1795	0.0292943	0.0682684
ENSMUSG00000008668	Rps18	1226.25	1367.13	1172.2	1172.2	957.838	1043.15	1262.48	1128.83	1166.26	0.166912	0.128858	1.29532	0.19521	0.307865
ENSMUSG00000008682	Rpl10	1451.81	1494.4	1503.87	1503.87	1685.95	1653.65	1723.45	1756.06	1596.63	-0.194647	0.0880556	-2.2105	0.0270704	0.0640624
ENSMUSG00000008683	Rps15a	485.988	796.519	441.846	441.846	418.11	528.567	611.024	665.813	548.714	-0.0355738	0.223119	-0.159439	0.873323	0.916048
ENSMUSG00000008690	Ncaph2	677.718	672.428	596.322	596.322	542.907	589.517	550.82	609.281	604.414	0.148519	0.121029	1.22713	0.219774	0.33818
ENSMUSG00000008730	Hipk1	315.79	339.396	365.744	365.744	413.341	445.635	425.021	365.21	379.485	-0.24643	0.139503	-1.76648	0.0773152	0.149941
ENSMUSG00000008734	Gprc5b	19.4805	11.6667	2.2717	2.2717	5.5642	0	0.898564	3.58929	5.71784	0.841349	0.559212	1.50453	0.132446	0.227765
ENSMUSG00000008763	Man1a2	340.397	391.366	261.246	261.246	233.697	325.733	260.584	251.25	290.69	0.222281	0.195935	1.13446	0.256602	0.380353
ENSMUSG00000008822	Acyp1	27.6829	62.5761	31.8038	31.8038	40.5392	26.9779	26.9569	26.0223	34.2954	0.306697	0.369968	0.828981	0.407115	0.535299
ENSMUSG00000008845	Cd163	122.01	223.789	144.253	144.253	2868.74	543.555	330.672	206.384	572.957	-1.66949	0.537103	-3.10831	0.00188157	0.0066703
ENSMUSG00000008855	Hdac5	1249.83	1339.55	1534.54	1534.54	620.806	1015.17	1021.67	829.125	1143.15	0.681689	0.174034	3.91698	8.96637e-05	0.000466591
ENSMUSG00000008859	Rala	756.665	815.61	464.563	464.563	485.675	668.452	785.345	889.246	666.265	-0.168541	0.235373	-0.716059	0.473955	0.59605
ENSMUSG00000008892	Vdac3	806.905	710.61	521.356	521.356	552.446	511.581	638.879	586.848	606.248	0.157414	0.17776	0.885542	0.375865	0.504185
ENSMUSG00000008958	Vps72	207.109	203.637	258.974	258.974	180.439	178.853	171.626	183.951	205.445	0.367375	0.170651	2.15278	0.0313356	0.0719751
ENSMUSG00000008976	Gabpa	136.364	198.334	201.046	201.046	450.7	347.715	405.253	376.875	289.667	-1.07274	0.183172	-5.85645	4.7287e-09	6.55341e-08
ENSMUSG00000009013	Dynll1	1623.04	2043.8	1243.76	1243.76	1514.26	1353.89	1520.37	1393.54	1492.05	0.0879982	0.171717	0.512459	0.60833	0.715458
ENSMUSG00000009030	Pdcl	70.7451	102.879	151.068	151.068	198.722	206.831	201.278	149.853	154.056	-0.632955	0.26051	-2.42968	0.0151122	0.0397066
ENSMUSG00000009035	Tmem184b	374.231	365.911	391.869	391.869	433.213	385.684	388.18	454.045	398.125	-0.123511	0.132011	-0.935611	0.349474	0.478625
ENSMUSG00000009073	Nf2	217.362	133.637	204.453	204.453	180.439	279.771	233.627	282.656	217.05	-0.345954	0.222399	-1.55555	0.119814	0.210803
ENSMUSG00000009076	Zmat5	206.084	185.607	130.623	130.623	105.72	76.937	106.031	99.6027	130.153	0.714252	0.237078	3.01273	0.00258912	0.00876947
ENSMUSG00000009079	Ewsr1	3092.28	3076.83	2703.33	2703.33	1613.62	1770.55	1645.27	1799.13	2300.54	0.755035	0.104903	7.19746	6.13441e-13	1.67857e-11
ENSMUSG00000009090	Ap1b1	1208.82	982.126	1027.95	1027.95	2457.79	1937.41	1949.88	1429.43	1502.67	-0.852253	0.16834	-5.0627	4.13357e-07	3.87939e-06
ENSMUSG00000009112	Bcl2l13	144.566	123.031	159.019	159.019	228.927	170.86	235.424	201.897	177.843	-0.501771	0.192664	-2.60439	0.0092039	0.0259343
ENSMUSG00000009185	Ccl8	2649.35	5811.09	1677.65	1677.65	3058.72	2355.07	1300.22	1483.27	2501.63	0.435847	0.424282	1.02726	0.304298	0.43219
ENSMUSG00000009207	Lnpk1	75.8716	102.879	144.253	144.253	155.798	111.908	112.321	104.089	118.922	-0.0513238	0.264202	-0.19426	0.845972	0.897744
ENSMUSG00000009291	Pttg1ip	1037.6	943.944	743.983	743.983	1236.05	1044.14	886.883	991.54	953.515	-0.255497	0.163512	-1.56256	0.118156	0.208331
ENSMUSG00000009292	Trpm2	126.111	196.213	160.155	160.155	96.1812	132.891	114.118	104.089	136.239	0.503959	0.217889	2.31291	0.0207275	0.0515609
ENSMUSG00000009293	Ube2g2	707.451	463.487	500.911	500.911	208.26	245.799	292.033	340.085	407.367	0.967035	0.20295	4.76491	1.88942e-06	1.51763e-05
ENSMUSG00000009376	Met	50.2393	120.91	102.227	102.227	18.2824	41.9656	49.421	92.4241	72.2119	0.763859	0.396073	1.92858	0.0537828	0.111646
ENSMUSG00000009406	Elk1	36.9105	44.5457	63.6077	63.6077	75.5142	73.9394	58.4067	42.1741	57.3382	-0.241223	0.312472	-0.771983	0.440125	0.565158
ENSMUSG00000009418	Nav1	222.488	351.062	548.616	548.616	515.086	640.475	432.21	525.83	473.048	-0.320884	0.256243	-1.25226	0.210473	0.326025
ENSMUSG00000009470	Tnpo1	230.691	287.426	276.012	276.012	443.546	518.575	617.314	495.322	393.112	-0.935088	0.160731	-5.8177	5.96612e-09	8.10045e-08
ENSMUSG00000009535	Rnmt	520.848	776.367	447.526	447.526	257.543	356.708	389.977	325.728	440.278	0.694607	0.214304	3.24123	0.00119017	0.00451306
ENSMUSG00000009549	Srp14	875.599	851.671	636.077	636.077	543.702	591.515	646.966	643.38	678.123	0.300894	0.157809	1.9067	0.0565596	0.116349
ENSMUSG00000009555	Cdk9	1535.89	1238.79	1306.23	1306.23	982.479	963.211	1034.25	978.978	1168.26	0.439952	0.113459	3.87763	0.000105478	0.000539185
ENSMUSG00000009563	Tor2a	234.792	264.092	178.329	178.329	225.748	233.808	249.801	235.996	225.112	-0.138455	0.186625	-0.741892	0.458153	0.58187
ENSMUSG00000009566	Fpgs	93.3015	90.152	68.1511	68.1511	27.0261	30.9746	46.7254	45.7634	58.7806	1.00648	0.297356	3.38477	0.000712377	0.00288592
ENSMUSG00000009569	Mkl2	112.782	151.667	102.227	102.227	155.003	74.9386	86.2622	78.067	107.897	0.229986	0.286309	0.803281	0.421812	0.548489
ENSMUSG00000009575	Cbx5	236.842	115.607	147.661	147.661	131.156	82.9321	133.886	142.674	142.302	0.375596	0.268909	1.39674	0.162491	0.267749
ENSMUSG00000009585	Apobec3	350.65	397.729	532.714	532.714	499.188	547.551	662.242	775.286	537.259	-0.439674	0.19797	-2.22092	0.0263566	0.062762
ENSMUSG00000009621	Vav2	82.0233	94.3944	115.857	115.857	170.106	266.781	354.034	270.094	183.643	-1.3075	0.247909	-5.27413	1.33385e-07	1.406e-06
ENSMUSG00000009630	Ppp2cb	61.5175	66.8185	42.0265	42.0265	47.6932	119.902	165.336	178.567	90.4859	-1.1187	0.358174	-3.12333	0.00178815	0.00638566
ENSMUSG00000009640	Dmap1	91.251	232.274	146.525	146.525	96.9761	120.901	105.132	83.4509	127.879	0.561281	0.280974	1.99762	0.0457576	0.097873
ENSMUSG00000009647	Mcu	49.214	146.364	63.6077	63.6077	113.669	68.9435	59.3053	67.2991	79.0013	0.053855	0.353991	0.152137	0.879079	0.919651
ENSMUSG00000009654	Oit3	0	9.5455	19.3095	19.3095	10.3335	6.99427	8.08708	8.97322	10.3191	0.290783	0.546841	0.53175	0.594899	0.703606
ENSMUSG00000009687	Fxyd5	4835.28	4210.63	3888.02	3888.02	5424.3	5251.7	5240.43	5855.92	4824.29	-0.368355	0.111099	-3.31555	0.00091463	0.00358842
ENSMUSG00000009733	Tfcp2	20.5058	18.0304	26.1246	26.1246	27.821	28.9763	16.1742	19.7411	22.9372	-0.0277489	0.384565	-0.0721566	0.942477	0.961713
ENSMUSG00000009741	Ubp1	571.087	592.882	654.251	654.251	337.032	344.718	250.699	325.728	466.331	0.956464	0.150564	6.35255	2.11774e-10	3.76999e-09
ENSMUSG00000009772	Nuak2	1416.95	1209.1	1402.78	1402.78	1047.66	1639.66	1671.33	1554.16	1418.05	-0.119481	0.162831	-0.733775	0.463086	0.586061
ENSMUSG00000009828	Ick	19.4805	48.7881	28.3963	28.3963	42.129	48.9599	34.1454	28.7143	34.8762	-0.262111	0.367467	-0.71329	0.475666	0.597678
ENSMUSG00000009863	Sdhb	1270.34	1591.98	921.176	921.176	1273.41	996.184	1200.48	1203.31	1172.26	0.00943116	0.189305	0.0498199	0.960266	0.974474
ENSMUSG00000009894	Snap47	65.6187	88.0307	63.6077	63.6077	81.0784	79.9345	84.4651	50.25	72.0741	-0.0691242	0.272181	-0.253964	0.799523	0.864266
ENSMUSG00000009905	Kdsr	91.251	180.304	179.465	179.465	162.952	169.861	182.409	177.67	165.422	-0.130856	0.237938	-0.549961	0.582346	0.692588
ENSMUSG00000009907	Vps4b	788.449	940.762	867.791	867.791	802.04	893.268	1038.74	1059.74	907.322	-0.128769	0.136299	-0.944759	0.344782	0.47402
ENSMUSG00000009927	Rps25	1103.21	1478.49	1055.21	1055.21	1046.86	1141.07	1319.99	1423.15	1202.9	-0.0699208	0.160365	-0.436011	0.662829	0.758294
ENSMUSG00000009995	Taz	1156.53	853.792	914.361	914.361	286.159	319.738	347.744	386.746	647.429	1.48857	0.156334	9.52172	1.70328e-21	1.49372e-19
ENSMUSG00000010025	Aldh3a2	156.87	215.304	203.317	203.317	401.417	397.674	317.193	347.263	280.295	-0.888858	0.172332	-5.15783	2.49835e-07	2.47958e-06
ENSMUSG00000010045	Tmem115	141.49	172.88	194.231	194.231	276.62	350.713	328.875	269.196	241.029	-0.78031	0.183235	-4.25852	2.05785e-05	0.000128905
ENSMUSG00000010047	Hyal2	165.072	211.062	152.204	152.204	186.003	196.839	143.77	100.5	163.457	0.112656	0.245701	0.458509	0.646587	0.745858
ENSMUSG00000010048	Ifrd2	9.22762	53.0306	46.5699	46.5699	38.9494	21.982	47.6239	44.8661	38.6024	0.0122092	0.429768	0.0284089	0.977336	0.98572
ENSMUSG00000010051	Hyal1	304.512	509.093	331.669	331.669	108.105	78.9353	107.828	64.6072	229.552	1.93871	0.239563	8.09267	5.83685e-16	2.58051e-14
ENSMUSG00000010054	Tusc2	181.477	213.183	247.616	247.616	108.899	128.894	117.712	148.955	174.294	0.792634	0.197746	4.00835	6.11444e-05	0.000336169
ENSMUSG00000010057	Nprl2	160.971	194.092	137.438	137.438	91.4119	112.907	102.436	113.96	131.332	0.563492	0.210376	2.6785	0.0073953	0.0214598
ENSMUSG00000010067	Rassf1	786.399	910.004	773.515	773.515	492.034	533.563	569.69	565.313	675.504	0.579355	0.123826	4.67879	2.88577e-06	2.22923e-05
ENSMUSG00000010095	Slc3a2	5373.55	5229.87	4789.89	4789.89	3486.37	3963.75	3756.9	3711.32	4387.69	0.433057	0.0960038	4.51083	6.45731e-06	4.53623e-05
ENSMUSG00000010097	Nxf1	2945.66	2487.13	2526.13	2526.13	977.71	971.204	1248.11	1058.84	1842.62	1.28398	0.126854	10.1217	4.42543e-24	5.03699e-22
ENSMUSG00000010110	Stx5a	1095.01	1058.49	1060.89	1060.89	530.984	434.644	561.603	506.987	788.686	1.05785	0.121927	8.67604	4.09787e-18	2.35716e-16
ENSMUSG00000010142	Tnfrsf13b	103.554	188.789	262.382	262.382	561.19	420.655	332.469	340.982	309.05	-0.953813	0.275973	-3.45618	0.000547883	0.00232151
ENSMUSG00000010277	2610507B11Rik	372.181	530.306	651.979	651.979	1333.82	1353.89	1406.25	1343.29	955.462	-1.26867	0.176657	-7.18154	6.89318e-13	1.87183e-11
ENSMUSG00000010290	AI597479	54.3405	31.8183	67.0152	67.0152	61.2062	84.9304	70.9866	58.3259	61.9548	-0.29728	0.304172	-0.977342	0.3284	0.457374
ENSMUSG00000010307	Tmem86a	307.587	520.76	469.107	469.107	1040.51	881.278	637.981	719.652	630.747	-0.862026	0.20514	-4.20213	2.6441e-05	0.000160014
ENSMUSG00000010358	Ifi35	574.163	492.124	470.243	470.243	314.775	254.791	283.946	324.83	398.139	0.753484	0.149899	5.02662	4.99193e-07	4.59232e-06
ENSMUSG00000010362	Rdm1	55.3657	46.6669	77.2379	77.2379	69.1551	68.9435	44.9282	45.7634	60.6623	0.150195	0.300631	0.4996	0.617357	0.723292
ENSMUSG00000010376	Nedd8	865.346	1116.82	569.062	569.062	561.984	702.425	690.996	783.362	732.382	0.181079	0.221459	0.817664	0.413549	0.5409
ENSMUSG00000010392	Gosr1	257.348	115.607	224.899	224.899	210.645	244.799	197.684	216.255	211.517	-0.0754105	0.240308	-0.313807	0.753667	0.829577
ENSMUSG00000010406	Mrpl52	379.358	408.335	474.786	474.786	257.543	313.743	314.498	352.647	371.962	0.478246	0.160856	2.97314	0.00294773	0.0098279
ENSMUSG00000010453	Kansl3	867.397	821.974	983.647	983.647	240.056	308.747	308.208	334.701	606.047	1.5891	0.149498	10.6296	2.1715e-26	3.09772e-24
ENSMUSG00000010461	Eya4	23.5817	15.9092	3.40755	3.40755	75.5142	54.955	40.4354	72.6831	36.2367	-1.86681	0.458601	-4.07066	4.68803e-05	0.000266936
ENSMUSG00000010517	Faf1	215.311	228.031	346.435	346.435	392.674	313.743	313.599	351.75	313.497	-0.264148	0.204485	-1.29177	0.196438	0.309436
ENSMUSG00000010554	Mettl16	53.3152	82.7277	126.08	126.08	133.541	131.892	186.901	139.982	122.565	-0.569305	0.285208	-1.99611	0.0459224	0.0981861
ENSMUSG00000010607	Pigyl	99.4533	114.546	49.9775	49.9775	61.2062	38.9681	71.8852	46.6607	66.5843	0.467116	0.342857	1.36242	0.173065	0.281129
ENSMUSG00000010608	Rbm25	1818.87	1980.16	2131.99	2131.99	800.45	898.264	1252.6	989.746	1500.51	1.01283	0.154235	6.56681	5.14062e-11	1.03849e-09
ENSMUSG00000010609	Psen2	154.819	347.88	298.729	298.729	279.005	229.812	229.134	272.786	263.862	0.11549	0.237217	0.486854	0.626362	0.730562
ENSMUSG00000010660	Plcd1	38.9611	9.5455	37.4831	37.4831	34.975	15.9869	17.9713	8.97322	25.1724	0.513401	0.463935	1.10662	0.268457	0.393696
ENSMUSG00000010663	Fads1	395.763	235.456	372.559	372.559	466.598	513.579	351.339	441.482	393.667	-0.353304	0.199783	-1.76844	0.0769877	0.149436
ENSMUSG00000010721	Lmbr1	0	24.3941	12.4944	12.4944	14.3079	28.9763	16.1742	2.69196	13.9416	-0.190585	0.5532	-0.344513	0.73046	0.811547
ENSMUSG00000010751	Tnfrsf22	8.20233	15.9092	18.1736	18.1736	27.0261	11.9902	21.5655	17.0491	17.2612	-0.300385	0.437592	-0.68645	0.492429	0.61283
ENSMUSG00000010755	Cars	311.689	354.244	240.801	240.801	182.824	185.848	173.423	167.799	232.178	0.674103	0.186596	3.61263	0.000303102	0.00137586
ENSMUSG00000010911	Apip	110.731	149.546	88.5964	88.5964	114.464	121.9	130.292	99.6027	112.966	-0.0856852	0.241807	-0.354353	0.723074	0.806103
ENSMUSG00000010914	Pdhx	174.3	91.2126	172.649	172.649	193.157	155.872	107.828	147.161	151.854	0.0139795	0.264041	0.0529447	0.957776	0.972963
ENSMUSG00000010936	Vac14	387.56	271.516	358.929	358.929	694.73	558.542	552.617	482.759	458.198	-0.715625	0.173254	-4.1305	3.61976e-05	0.000211512
ENSMUSG00000011008	Mcoln2	68.6945	138.94	90.8681	90.8681	313.98	102.916	132.089	94.2188	129.072	-0.642992	0.356549	-1.80338	0.0713288	0.140388
ENSMUSG00000011096	Akt1s1	55.3657	83.7883	70.4228	70.4228	96.9761	77.9361	45.8268	61.0179	70.2196	-0.0101485	0.29617	-0.0342656	0.972665	0.983087
ENSMUSG00000011114	Tbrg1	239.918	260.91	251.023	251.023	180.439	176.855	184.206	192.924	217.162	0.44101	0.149694	2.94608	0.00321826	0.0105793
ENSMUSG00000011148	Adssl1	1404.65	1411.67	1321	1321	848.143	808.338	840.158	740.29	1086.91	0.747141	0.104554	7.14601	8.93352e-13	2.3776e-11
ENSMUSG00000011158	Brf1	659.263	657.579	467.971	467.971	227.337	252.793	254.294	197.411	398.077	1.23987	0.182468	6.79501	1.08304e-11	2.47067e-10
ENSMUSG00000011179	Odc1	2185.92	1718.19	2743.08	2743.08	724.936	1226	1381.09	1260.74	1747.88	0.993811	0.211432	4.70039	2.59669e-06	2.02936e-05
ENSMUSG00000011256	Adam19	238.893	257.729	291.914	291.914	275.031	202.834	212.061	195.616	245.749	0.277171	0.179154	1.54711	0.121837	0.21345
ENSMUSG00000011306	Sugp1	236.842	352.123	347.571	347.571	130.361	164.865	152.756	184.848	239.617	0.988167	0.198844	4.96955	6.7107e-07	5.9732e-06
ENSMUSG00000011382	Dhdh	24.607	47.7275	64.7435	64.7435	62.796	100.917	66.4938	62.8125	61.8551	-0.485128	0.335724	-1.44502	0.148453	0.249223
ENSMUSG00000011427	Zfp790	0	8.48489	35.2114	35.2114	104.925	62.9484	55.711	32.3036	41.8495	-1.14645	0.523568	-2.18968	0.0285477	0.0667701
ENSMUSG00000011752	Pgam1	1310.32	1454.1	1439.12	1439.12	2026.96	2323.1	2486.33	2326.75	1850.73	-0.692735	0.108795	-6.36737	1.92293e-10	3.44614e-09
ENSMUSG00000011831	Evi5	196.856	166.516	269.197	269.197	373.596	339.722	287.541	268.299	271.365	-0.476671	0.208786	-2.28306	0.022427	0.0550841
ENSMUSG00000011832	Evi5l	86.1245	72.1216	43.1624	43.1624	46.8983	68.9435	45.8268	57.4286	57.9585	0.149279	0.319115	0.467791	0.639934	0.740579
ENSMUSG00000011837	Snapc2	62.5428	81.6671	71.5587	71.5587	67.5653	43.964	76.378	65.5045	67.5924	0.167383	0.267807	0.625011	0.531964	0.64921
ENSMUSG00000011877	Git1	225.564	281.062	164.698	164.698	182.824	245.799	287.541	220.741	221.616	-0.155294	0.231022	-0.672202	0.501455	0.620669
ENSMUSG00000011884	Gltp	1925.5	1588.8	1385.74	1385.74	2206.6	1962.39	1584.17	1691.45	1716.3	-0.239016	0.158103	-1.51178	0.13059	0.225534
ENSMUSG00000011958	Bnip2	989.406	862.277	1018.86	1018.86	1324.28	1280.95	1372.11	1294.84	1145.2	-0.43504	0.107708	-4.03907	5.36634e-05	0.000300757
[truncated: 9,817 more rows]

## Sheet: MAC3
Row.names	Gene_Symbol	Pad4Flox_LyzMCre_MAC3_1	Pad4Flox_LyzMCre_MAC3_2	Pad4Flox_LyzMCre_MAC3_3	Pad4Flox_LyzMCre_MAC3_4	Pad4_ko_MAC3_1	Pad4_ko_MAC3_2	Pad4_ko_MAC3_3	baseMean	log2FoldChange	lfcSE	stat	pvalue	padj
[truncated: 10,698 more rows]

[truncated: 1 more sheets: MAC4]
