# Supplementary material for: PAD4 deletion in synovial macrophages exacerbates pathology in inflammatory arthritis
Source: Research Square preprint supplement (doi:10.21203/rs.3.rs-9653857/v1), 2026-06-11
Supplement: Supplementary file 1 [file d9e785c42406940eecfd22fc.docx]

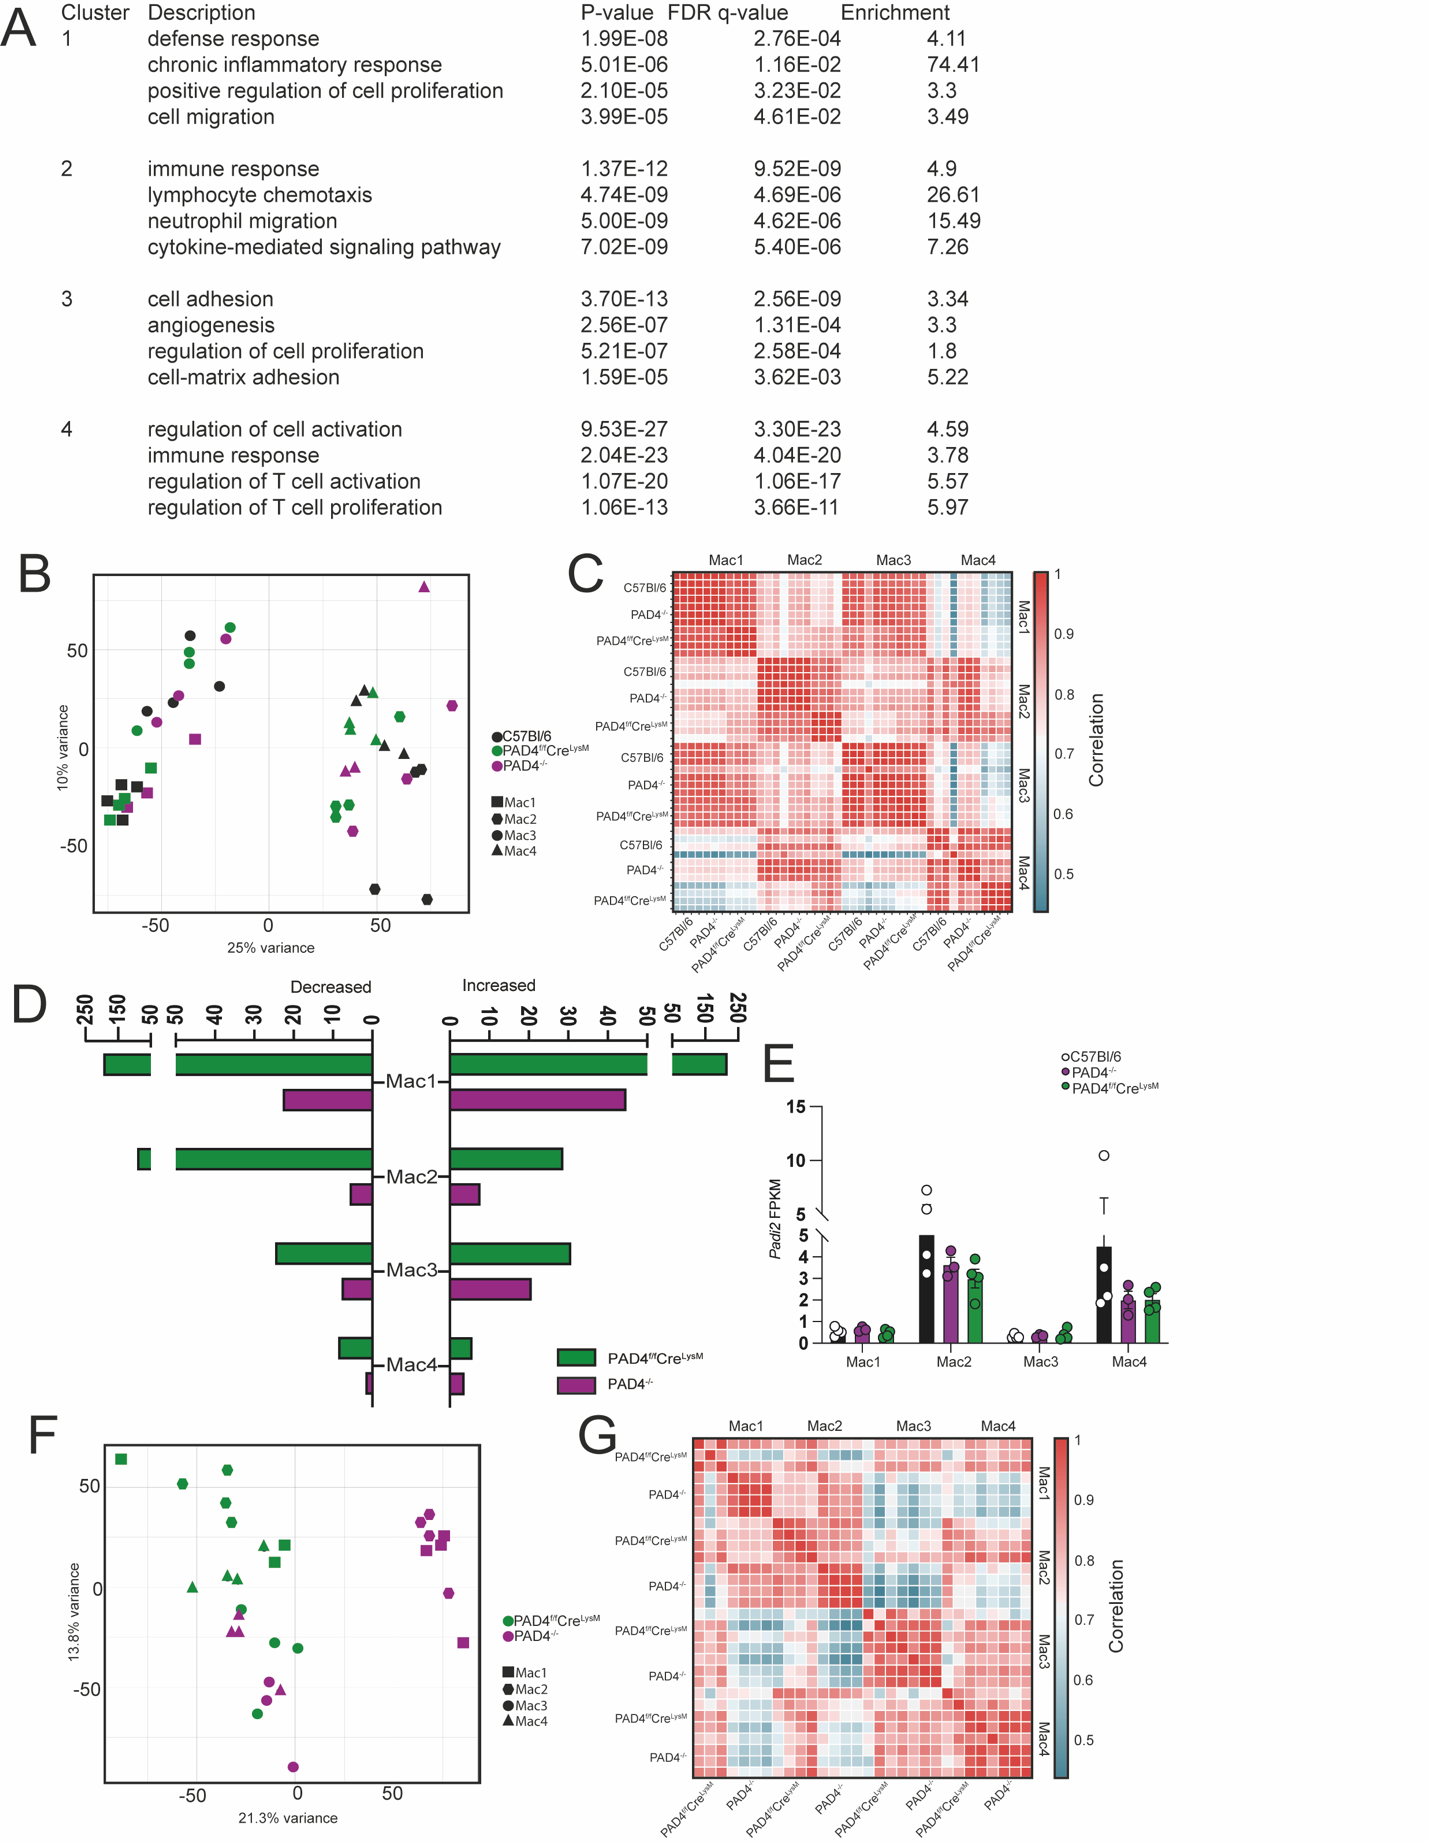


Supplementary Figure 1: A) Pathways enriched in gene clusters 1-4 in Mac1-4 populations sorted from N=4 C57Bl/6 mice. B) PCA plot showing intrasample variance between Mac1-4 populations from N=4 C57Bl/6, N=3 PAD4-/-, and N=4 PAD4f/fCreLysM mice. C) Pairwise Pearson correlation between FPKM gene expression in synovial macrophage subpopulations from N=4 C57Bl/6, N=3 PAD4-/-, and N=4 PAD4f/fCreLysM mice. D) Number of significantly different (padj <0.05) expressed genes in PAD4-/- or PAD4f/fCreLysM compared to C57Bl/6. E) Expression of *Padi2* gene in from N=4 C57Bl/6, N=3 PAD4-/-, and N=4 PAD4f/fCreLysM mice. F) PCA plot showing intrasample variance between Mac1-4 populations from N=4 PAD4-/-, and N=4 PAD4f/fCreLysM mice during peak STIA (D7). G) Pairwise Pearson correlation between FPKM gene expression in synovial macrophage subpopulations from N=4 PAD4-/-, and N=4 PAD4f/fCreLysM mice. In both F-G 1 Mac1 and 1 Mac3 replicates were removed due to sequencing error.
