# Supplementary material for: PAD4 deletion in synovial macrophages exacerbates pathology in inflammatory arthritis
Source: Research Square preprint supplement (doi:10.21203/rs.3.rs-9653857/v1), 2026-06-11
Supplement: Supplementary file 2 [file 30dbc237e81032352e4ccf7f.xlsx]

## Sheet: MAC1_PAD4flCreLysMVsC57Bl6
Row.names	Gene_Symbol	B6_MAC1_1	B6_MAC1_2	B6_MAC1_3	B6_MAC1_4	Pad4flfl_LyzMCre_MAC1_1	Pad4flfl_LyzMCre_MAC1_2	Pad4flfl_LyzMCre_MAC1_3	Pad4flfl_LyzMCre_MAC1_4	baseMean	log2FoldChange	lfcSE	stat	pvalue	padj
ENSMUSG00000000001	Gnai3	2823.63	2854.82	2965.49	2774.8	2504.02	2715.11	2740.55	2611.96	2748.8	-0.105931	0.0580383	-1.82519	0.0679717	0.334537
ENSMUSG00000000028	Cdc45	44.2134	46.31	47.3721	35.9068	43.2764	54.4712	49.8478	47.7426	46.1425	0.0988167	0.137364	0.719377	0.471908	NA
ENSMUSG00000000056	Narf	351.698	310.663	251.072	354.081	336.594	334.34	288.251	317.705	318.051	0.00957269	0.104063	0.0919891	0.926707	0.979686
ENSMUSG00000000058	Cav2	2113.2	1682.6	2263.44	1992.83	1967.87	1757.16	1782.6	1526.9	1885.83	-0.173425	0.0885123	-1.95933	0.050074	0.28762
ENSMUSG00000000078	Klf6	9966.11	8780.57	10819.8	8641.58	8892.09	8109.63	8838.24	8624.92	9084.12	-0.137704	0.0732268	-1.88052	0.0600377	0.315235
ENSMUSG00000000085	Scmh1	222.072	260.494	236.861	239.379	205.563	293.956	253.574	253.47	245.671	0.060978	0.106037	0.575062	0.565249	0.83342
ENSMUSG00000000088	Cox5a	935.516	731.312	837.539	761.026	1156.44	919.436	961.197	964.401	908.358	0.258053	0.0891545	2.89445	0.00379828	0.0700815
ENSMUSG00000000127	Fer	638.08	645.446	520.146	549.574	494.072	472.396	520.151	489.579	541.181	-0.22444	0.0872233	-2.57316	0.0100774	0.120341
ENSMUSG00000000131	Xpo6	1073.18	1241.69	1097.14	1202.88	1042.24	1243.44	1090.15	1272.56	1157.91	0.0110399	0.0805155	0.137116	0.890939	0.97051
ENSMUSG00000000134	Tfe3	1513.31	1751.1	1527.28	1518.06	1588	1649.16	1607.05	1768.21	1615.27	0.063596	0.0702844	0.904839	0.365551	0.704267
ENSMUSG00000000148	Brat1	159.771	171.733	143.064	138.64	127.425	127.725	139.791	131.943	142.512	-0.172534	0.113696	-1.5175	0.12914	0.460334
ENSMUSG00000000149	Gna12	636.071	1491.57	973.023	2990.24	3289	1029.32	2787.14	1803.8	1875.02	0.109367	0.111388	0.981855	0.326171	0.679344
ENSMUSG00000000154	Slc22a18	39.1892	47.2748	53.0568	45.881	46.8827	47.8971	32.5095	34.7219	43.4266	-0.10851	0.138487	-0.783538	0.433312	NA
ENSMUSG00000000168	Dlat	615.974	627.115	575.097	626.375	637.124	593.548	667.528	585.932	616.087	0.0196913	0.0778897	0.252811	0.800415	0.941988
ENSMUSG00000000171	Sdhd	1660.01	1748.2	1811.51	1584.89	1773.13	1655.74	1688.32	1546.86	1683.58	-0.0292503	0.0686295	-0.426206	0.669958	0.888215
ENSMUSG00000000184	Ccnd2	33.1601	36.6621	46.4247	65.8292	64.9145	46.9579	39.0114	44.2704	47.1538	0.0474684	0.13907	0.341328	0.732857	NA
ENSMUSG00000000194	Gpr107	468.261	520.023	503.092	457.812	479.646	483.666	439.961	499.127	481.449	-0.0308956	0.082994	-0.372263	0.709697	0.904475
ENSMUSG00000000202	Btbd17	2.0097	9.64792	15.1591	11.9689	15.6276	6.5741	13.0038	13.8888	10.985	0.0668408	0.112075	0.596393	0.550913	NA
ENSMUSG00000000204	Slfn4	16.0776	4.82396	21.7912	23.9379	6.01061	8.45242	8.66919	11.2846	12.6309	-0.208097	0.116367	-1.78827	0.0737317	NA
ENSMUSG00000000244	Tspan32	147.713	139.895	143.064	153.601	133.435	123.969	112.699	79.8604	129.28	-0.279836	0.12368	-2.26258	0.0236614	0.192803
ENSMUSG00000000253	Gmpr	363.756	337.677	304.129	273.291	332.988	379.42	368.441	361.976	340.21	0.150635	0.0971137	1.55112	0.120872	0.44549
ENSMUSG00000000275	Trim25	472.28	451.523	560.886	719.134	514.508	528.746	543.992	551.21	542.785	-0.0352793	0.106221	-0.332131	0.73979	0.917406
ENSMUSG00000000276	Dgke	40.194	67.5355	51.1619	61.8396	43.2764	65.741	70.4372	58.1592	57.2931	0.0631117	0.137596	0.458675	0.646468	0.877639
ENSMUSG00000000278	Scpep1	5953.74	5745.34	6018.15	5515.69	5093.39	5517.55	5070.39	5109.33	5502.95	-0.153054	0.0570775	-2.68151	0.00732917	0.0993853
ENSMUSG00000000282	Mnt	75.3638	64.6411	62.5312	84.78	96.1697	76.0718	53.0988	78.1243	73.8476	0.0485091	0.134648	0.360267	0.718648	0.908893
ENSMUSG00000000290	Itgb2	14197.5	13509	13214.9	13908.9	11559.6	12607.3	12588.7	12987.7	13071.7	-0.134301	0.056186	-2.39028	0.0168353	0.160217
ENSMUSG00000000295	Hddc2	60.2911	69.465	91.9019	89.7671	132.233	96.7333	110.532	100.694	93.9522	0.332156	0.130285	2.54945	0.0107893	0.12548
ENSMUSG00000000301	Pemt	11.0534	8.68313	8.52698	10.9715	12.0212	15.0265	11.9201	17.361	11.9455	0.145633	0.124032	1.17416	0.240331	NA
ENSMUSG00000000317	Bcl6b	38.1843	54.0284	39.7926	40.8939	56.4997	61.9844	57.4334	51.2148	50.0039	0.230399	0.136876	1.68327	0.0923237	NA
ENSMUSG00000000318	Clec10a	463.236	494.938	686.896	701.181	506.093	524.989	474.638	422.739	534.339	-0.229257	0.109647	-2.09087	0.03654	0.245161
ENSMUSG00000000325	Arvcf	77.3735	71.3946	79.5851	50.868	76.9357	73.2543	70.4372	75.5201	71.9211	0.0547781	0.132369	0.41383	0.678999	0.891397
ENSMUSG00000000326	Comt	1899.17	2010.63	1741.4	1698.59	1955.85	1693.3	1734.92	1876.72	1826.32	-0.0165891	0.0736358	-0.225286	0.821757	0.948185
ENSMUSG00000000339	Rtca	215.038	220.937	236.861	237.384	224.797	277.052	286.083	269.095	245.906	0.184394	0.100809	1.82914	0.0673785	0.333522
ENSMUSG00000000340	Dbt	231.116	244.092	219.807	200.48	186.329	220.702	218.897	201.387	215.351	-0.093935	0.103726	-0.905607	0.365144	0.703865
ENSMUSG00000000346	Dazap2	9619.44	8998.62	9738.76	8968.73	9183	9369.98	9388.73	8666.59	9241.73	-0.0269059	0.0561512	-0.47917	0.631818	0.870147
ENSMUSG00000000355	Mcts1	489.362	339.607	450.982	395.973	514.508	366.272	448.631	335.934	417.659	-0.0100724	0.113439	-0.0887914	0.929248	0.980589
ENSMUSG00000000359	Rem1	12.0582	12.5423	20.8437	10.9715	26.4467	15.9657	19.5057	22.5692	17.6129	0.189749	0.131076	1.44763	0.147721	NA
ENSMUSG00000000374	Trappc10	188.912	200.677	208.437	272.294	280.094	271.417	301.254	308.157	253.905	0.340217	0.107619	3.1613	0.00157067	0.038746
ENSMUSG00000000378	Ccm2	428.067	572.122	474.668	491.724	564.997	538.137	489.809	456.593	502.015	0.0498161	0.0951136	0.523754	0.60045	0.852302
ENSMUSG00000000384	Tbrg4	27.131	40.5213	22.7386	28.925	24.0424	31.9314	20.5893	28.6456	28.0656	-0.0753516	0.137876	-0.546518	0.58471	NA
ENSMUSG00000000386	Mx1	14.0679	15.4367	24.6335	17.9534	10.8191	29.1139	13.0038	41.6663	20.8368	0.11884	0.125938	0.943641	0.345353	NA
ENSMUSG00000000392	Fap	15.0728	5.78875	14.2116	16.956	14.4255	12.2091	8.66919	12.1527	12.4357	-0.0341729	0.121682	-0.280837	0.778835	NA
ENSMUSG00000000399	Ndufa9	1048.06	1017.86	1069.66	925.599	1044.64	1001.14	1044.64	952.248	1012.98	-0.00727782	0.071953	-0.101147	0.919434	0.978569
ENSMUSG00000000420	Galnt1	1645.95	1772.32	1541.49	1916.03	2013.55	1581.54	1712.17	1686.62	1733.71	0.0213283	0.0831811	0.256409	0.797635	0.940533
ENSMUSG00000000439	Mkrn2	182.883	164.979	149.696	159.586	169.499	181.257	158.213	178.818	168.116	0.055618	0.108988	0.510311	0.609833	0.857691
ENSMUSG00000000440	Pparg	46.2232	40.5213	44.5298	58.8473	22.8403	26.2964	21.673	25.1734	35.7631	-0.491739	0.139063	-3.53608	0.000406118	NA
ENSMUSG00000000441	Raf1	281.358	412.931	346.764	351.089	389.487	370.028	368.441	367.184	360.91	0.086205	0.0999078	0.862845	0.388223	0.720585
ENSMUSG00000000486	2001-09-01	13.0631	3.85917	4.73721	4.98706	14.4255	15.9657	3.25095	6.07633	8.29562	0.0899111	0.101389	0.886794	0.37519	NA
ENSMUSG00000000489	Pdgfb	253.222	300.05	309.814	241.374	250.041	223.52	271.996	276.907	265.865	-0.0927236	0.104791	-0.884846	0.37624	0.711044
ENSMUSG00000000530	Acvrl1	281.358	358.903	307.919	289.25	282.498	393.507	303.422	269.963	310.852	0.0118861	0.109708	0.108344	0.913723	0.976931
ENSMUSG00000000531	Grasp	56.2717	49.2044	54.9516	63.8344	55.2976	65.741	60.6843	75.5201	60.1881	0.129583	0.134395	0.964193	0.334949	0.685389
ENSMUSG00000000532	Acvr1b	7.03396	13.5071	21.7912	9.97412	20.4361	19.7223	11.9201	13.8888	14.7842	0.0894526	0.124194	0.720262	0.471363	NA
ENSMUSG00000000538	Tom1l2	255.232	323.205	271.916	375.027	313.754	339.036	318.593	340.275	317.13	0.0824122	0.105193	0.783435	0.433372	0.75151
ENSMUSG00000000552	Zfp385a	137.665	166.909	144.011	160.583	147.861	157.779	132.205	168.401	151.927	-0.00249916	0.113888	-0.0219441	0.982493	0.99498
ENSMUSG00000000555	Itga5	2575.43	2806.58	3062.13	3316.4	2832.2	3425.11	3943.4	3637.99	3199.9	0.206857	0.0903797	2.28875	0.0220938	0.185745
ENSMUSG00000000561	Wdr77	154.747	126.388	144.959	120.687	141.85	162.474	137.623	144.096	141.603	0.0793112	0.115576	0.686227	0.49257	0.793234
ENSMUSG00000000563	Atp5f1	1476.13	1282.21	1375.69	1388.4	1686.58	1462.27	1367.56	1244.78	1410.45	0.05365	0.0842744	0.63661	0.524379	0.810935
ENSMUSG00000000568	Hnrnpd	309.494	405.213	470.879	590.468	675.592	520.293	594.923	591.14	519.75	0.324785	0.117225	2.77062	0.00559499	0.0845381
ENSMUSG00000000579	Dynlt1c	69.3347	57.8875	64.4261	76.8007	54.0954	67.6194	58.517	63.3675	64.006	-0.0865479	0.133039	-0.650548	0.515339	0.806473
ENSMUSG00000000581	C1d	532.571	495.903	597.836	528.628	601.061	600.122	598.174	526.905	560.15	0.0976078	0.0840774	1.16093	0.245671	0.607232
ENSMUSG00000000594	Gm2a	2266.94	2616.52	2490.83	2328.96	2489.59	2751.73	2524.9	2506.92	2497.05	0.0774733	0.0662983	1.16856	0.242582	0.60304
ENSMUSG00000000600	Krit1	407.97	404.248	384.661	396.97	405.115	387.872	422.623	372.392	397.731	-0.00645636	0.0844951	-0.0764112	0.939092	0.983983
ENSMUSG00000000605	Clcn4	1446.99	1539.81	1505.49	1355.48	1276.65	1326.09	1290.63	1346.34	1385.93	-0.148613	0.0655943	-2.26565	0.023473	0.19212
ENSMUSG00000000628	Hk2	329.591	344.431	360.028	294.237	364.243	365.332	300.171	439.232	349.658	0.122995	0.103832	1.18455	0.236196	0.59605
ENSMUSG00000000631	Myo18a	546.639	465.03	360.028	520.649	473.636	527.807	537.49	702.251	516.691	0.196658	0.11195	1.75666	0.0789758	0.35644
ENSMUSG00000000682	Cd52	133.645	129.282	123.167	176.542	248.839	179.379	154.962	151.908	162.216	0.268711	0.126767	2.11973	0.0340288	0.236529
ENSMUSG00000000686	Abhd15	60.2911	59.8171	41.6875	66.8266	81.7442	83.585	88.8592	73.7841	69.5743	0.334403	0.133203	2.51048	0.0120567	0.133387
ENSMUSG00000000693	Loxl3	5.02426	27.0142	6.63209	19.9482	9.61697	6.5741	10.8365	2.60414	11.0313	-0.168522	0.105119	-1.60315	0.108901	NA
ENSMUSG00000000708	Kat2b	166.805	190.064	181.909	194.495	201.956	192.527	192.889	198.783	189.929	0.0832189	0.103622	0.803105	0.421914	0.74401
ENSMUSG00000000711	Rab5b	316.528	312.593	269.074	327.151	301.732	317.435	325.095	288.192	307.225	0.00706895	0.0945637	0.0747533	0.940411	0.984588
ENSMUSG00000000732	Icosl	168.815	195.853	160.118	192.501	186.329	191.588	227.566	207.463	191.279	0.147617	0.108296	1.36309	0.172855	0.522978
ENSMUSG00000000738	Spg7	463.236	538.354	387.504	394.975	437.572	460.187	441.045	421.871	443.093	-0.0163858	0.0978237	-0.167503	0.866974	0.965485
ENSMUSG00000000740	Rpl13	1678.1	1512.79	1685.5	1403.36	1951.04	1895.22	1739.26	1878.46	1717.97	0.230488	0.0731514	3.15084	0.00162803	0.0398337
ENSMUSG00000000743	Chmp1a	1311.33	1497.36	1381.37	1261.73	1226.16	1366.47	1257.03	1374.12	1334.45	-0.0561144	0.0733482	-0.765042	0.444247	0.759388
ENSMUSG00000000751	Rpa1	682.294	783.411	774.06	691.207	840.283	929.766	843.079	797.736	792.729	0.19917	0.0788499	2.52594	0.0115389	0.130687
ENSMUSG00000000753	Serpinf1	169.82	199.712	245.387	470.779	116.606	317.435	254.657	164.929	242.416	-0.0949152	0.124148	-0.764535	0.444548	0.759388
ENSMUSG00000000759	Tubgcp3	240.159	274.001	200.858	244.366	246.435	250.755	241.654	266.491	245.59	0.0579136	0.103193	0.561216	0.57465	0.839667
ENSMUSG00000000776	Polr3d	108.524	94.5496	98.534	86.7749	129.829	155.9	118.118	136.283	116.064	0.357085	0.121151	2.94744	0.00320421	0.0627189
ENSMUSG00000000787	Ddx3x	4227.41	3637.27	4308.97	4134.27	3809.52	3720	3673.57	3918.37	3928.67	-0.102585	0.0648216	-1.58257	0.11352	0.432425
ENSMUSG00000000804	Usp32	104.505	85.8665	87.1647	110.713	126.223	98.6116	122.452	112.846	106.048	0.175936	0.123955	1.41936	0.155794	0.500633
ENSMUSG00000000811	Txnrd3	106.514	121.564	97.5865	96.749	86.5527	119.273	137.623	140.624	113.311	0.142497	0.127128	1.12089	0.262334	0.623727
ENSMUSG00000000823	Zfp512b	51.2474	67.5355	72.953	75.8033	80.5421	89.22	87.7756	90.277	76.9192	0.256225	0.130345	1.96575	0.049327	0.286723
ENSMUSG00000000826	Dnajc5	1031.98	1075.74	1027.97	1107.13	1092.73	1096	1119.41	1079.85	1078.85	0.0456053	0.0645885	0.70609	0.480132	0.786163
ENSMUSG00000000827	Tpd52l2	800.866	841.299	824.275	771.997	748.921	712.821	744.467	748.257	774.113	-0.123838	0.070174	-1.76472	0.0776105	0.354168
ENSMUSG00000000838	Fmr1	529.557	536.424	501.197	527.631	561.391	514.658	576.501	530.377	534.717	0.0528926	0.0783974	0.674673	0.499884	0.796304
ENSMUSG00000000876	Pxmp4	176.854	224.797	212.227	206.464	207.967	204.736	201.559	173.61	201.027	-0.0506632	0.107053	-0.473255	0.636031	0.871986
ENSMUSG00000000881	Dlg3	88.4269	92.62	52.1093	65.8292	42.0742	61.0453	70.4372	57.2911	66.2292	-0.212177	0.137443	-1.54375	0.122649	0.447758
ENSMUSG00000000884	Gnb1l	42.2037	49.2044	32.213	27.9275	27.6488	40.3838	52.0151	41.6663	39.1578	0.0477611	0.139025	0.343544	0.731189	NA
ENSMUSG00000000901	Mmp11	56.2717	46.31	45.4772	39.8965	44.4785	45.0796	36.8441	34.7219	43.6349	-0.125226	0.138195	-0.906153	0.364855	NA
ENSMUSG00000000902	Smarcb1	440.125	419.685	421.612	358.071	444.785	450.796	442.129	456.593	429.224	0.116425	0.0863233	1.34871	0.177431	0.52824
ENSMUSG00000000915	Hip1r	8.03881	2.89438	2.84233	5.98447	2.40424	7.51326	6.50189	8.68048	5.60748	0.0514346	0.0958535	0.536596	0.591547	NA
ENSMUSG00000000916	Nsun5	125.606	103.233	107.061	98.7438	86.5527	98.6116	102.947	78.1243	100.11	-0.178769	0.125006	-1.43008	0.152693	0.498494
ENSMUSG00000000934	Top1mt	55.2668	60.7819	45.4772	60.8421	69.723	59.1669	69.3535	58.1592	59.8463	0.126283	0.134371	0.939808	0.347316	0.69417
ENSMUSG00000000938	Hoxa10	3.01455	1.92958	10.4219	7.9793	2.40424	16.9048	2.1673	2.60414	5.92823	0.0062877	0.0843181	0.0745712	0.940556	NA
ENSMUSG00000000957	Mmp14	482.329	412.931	414.98	481.75	532.54	598.244	555.912	574.648	506.666	0.302289	0.0851478	3.55017	0.000384982	0.016161
ENSMUSG00000000958	Slc7a7	801.871	830.686	701.107	759.031	567.401	633.932	646.938	599.821	692.598	-0.305915	0.0797862	-3.83418	0.000125982	0.00738483
ENSMUSG00000000959	Oxa1l	171.83	160.156	168.645	196.49	144.255	143.691	175.551	168.401	166.127	-0.111626	0.111751	-0.99888	0.317853	0.673647
ENSMUSG00000000976	Heatr6	228.101	211.289	206.542	176.542	165.893	168.109	196.14	209.199	195.227	-0.121392	0.110314	-1.10043	0.271146	0.63413
ENSMUSG00000000982	Ccl3	1729.35	1353.6	1357.68	1311.6	1364.41	1281.01	1445.59	1566.83	1426.26	-0.0206936	0.0881641	-0.234717	0.814428	0.946503
ENSMUSG00000000983	Wfdc18	23.1116	32.8029	18.9488	30.9198	40.8721	29.1139	35.7604	32.1178	30.4559	0.171783	0.138593	1.23947	0.21517	NA
ENSMUSG00000001016	Ilf2	363.756	385.917	376.135	334.133	361.838	316.496	361.939	339.407	354.953	-0.0740796	0.0900079	-0.823035	0.410488	0.736887
ENSMUSG00000001017	Chtop	864.172	795.954	899.123	771	788.591	848.06	825.74	858.499	831.392	-0.00286408	0.0748473	-0.0382656	0.969476	0.99195
ENSMUSG00000001018	Snapin	1308.32	1276.42	1160.62	1316.58	1340.36	1211.51	1239.69	1020.82	1234.29	-0.0673677	0.0818191	-0.823375	0.410295	0.736796
ENSMUSG00000001020	S100a4	2227.75	2259.54	2372.39	2346.91	2849.03	2612.74	2343.93	2249.98	2407.79	0.11661	0.0746494	1.5621	0.118264	0.442029
ENSMUSG00000001025	S100a6	5724.64	4937.81	5335.05	4977.09	7954.43	5859.41	5359.73	5581.55	5716.21	0.207169	0.0942564	2.19793	0.0279539	0.211333
ENSMUSG00000001029	Icam2	16.0776	4.82396	11.3693	8.97671	15.6276	7.51326	11.9201	15.6249	11.4917	0.0688955	0.117711	0.585294	0.55835	NA
ENSMUSG00000001034	Mapk7	269.3	262.423	290.865	273.291	235.616	324.949	261.159	281.247	274.856	0.0112622	0.101909	0.110513	0.912003	0.976302
ENSMUSG00000001036	Epn2	141.684	204.536	170.54	193.498	156.276	224.459	204.81	198.783	186.823	0.112234	0.117792	0.952814	0.340684	0.68938
ENSMUSG00000001039	B9d1	4.0194	7.71834	3.78977	6.98189	3.60636	3.75663	3.25095	5.20829	4.79145	-0.0649959	0.0941282	-0.690504	0.489877	NA
ENSMUSG00000001052	Sec24b	505.44	569.227	522.041	570.52	484.455	543.772	543.992	570.307	538.719	-0.0129163	0.0827232	-0.156139	0.875923	0.967189
ENSMUSG00000001053	N4bp3	84.4075	90.6905	88.1121	94.7542	73.3294	116.456	100.779	69.4438	89.7465	0.00629876	0.131624	0.0478543	0.961832	0.990545
ENSMUSG00000001054	Rmnd5b	463.236	472.748	520.146	404.949	509.699	507.145	478.973	418.399	471.912	0.0334341	0.0928664	0.360024	0.718829	0.908893
ENSMUSG00000001056	Nhp2	463.236	493.009	503.092	445.843	591.444	556.921	558.079	539.926	518.944	0.214485	0.0798541	2.68596	0.00723223	0.0986651
ENSMUSG00000001062	Vps9d1	222.072	227.691	189.488	245.363	221.19	248.877	243.821	230.901	228.675	0.0808345	0.102956	0.785133	0.432376	0.75136
ENSMUSG00000001065	Zfp276	150.728	164.979	128.852	172.552	164.691	153.083	135.456	159.721	153.758	-0.007023	0.114871	-0.0611384	0.951249	0.986984
ENSMUSG00000001082	Mfsd10	405.96	397.494	393.188	373.032	361.838	462.066	366.273	341.143	387.624	-0.0299004	0.0964932	-0.309871	0.756659	0.921969
ENSMUSG00000001089	Luzp1	819.959	694.65	749.427	799.925	841.485	764.474	878.839	863.707	801.558	0.116902	0.0784035	1.49103	0.135954	0.472207
ENSMUSG00000001098	Kctd10	804.886	881.82	829.012	836.829	772.964	996.446	917.851	876.728	864.567	0.0813507	0.0807676	1.00722	0.313829	0.671821
ENSMUSG00000001100	Poldip2	336.625	396.53	282.338	322.164	351.019	350.306	347.851	340.275	340.888	0.0466047	0.0983257	0.473983	0.635512	0.871978
ENSMUSG00000001105	Ift20	235.135	220.937	244.44	220.428	278.892	274.234	274.163	269.095	252.166	0.216864	0.0950016	2.28274	0.0224457	0.186958
ENSMUSG00000001119	Col6a1	64.3105	80.0778	151.591	271.296	105.787	174.683	108.365	98.0894	131.775	-0.0516675	0.117976	-0.43795	0.661422	0.885026
ENSMUSG00000001120	Pcbp3	27.131	16.4015	21.7912	29.9224	22.8403	17.844	13.0038	31.2497	22.523	-0.0556336	0.13354	-0.416606	0.676966	NA
ENSMUSG00000001123	Lgals9	3885.76	3799.35	3446.79	3355.29	3631.61	3618.58	3819.86	3817.67	3671.86	0.0372463	0.0641401	0.580702	0.561441	0.831861
ENSMUSG00000001127	Araf	498.406	535.46	499.302	534.613	477.242	536.259	480.056	460.065	502.675	-0.07369	0.0820536	-0.898071	0.369148	0.70596
ENSMUSG00000001128	Cfp	1336.45	1280.28	1944.15	1884.11	1214.14	1158.92	1039.22	920.999	1347.28	-0.467034	0.108117	-4.31971	1.56237e-05	0.00187568
ENSMUSG00000001131	Timp1	15.0728	13.5071	24.6335	45.881	40.8721	22.5398	18.422	10.4166	23.9181	-0.0320772	0.123617	-0.259488	0.795259	NA
ENSMUSG00000001134	Uxt	138.669	103.233	107.061	109.715	187.531	150.265	125.703	144.096	133.284	0.295288	0.123022	2.40028	0.0163824	0.157761
ENSMUSG00000001138	Cnnm3	54.262	51.134	79.5851	64.8318	115.404	38.5055	82.3573	36.458	65.3172	0.048671	0.137834	0.353114	0.724003	0.910973
ENSMUSG00000001143	Lman2l	317.533	326.1	324.973	290.247	299.328	216.945	280.665	244.789	287.573	-0.233635	0.102189	-2.28631	0.0222362	0.186166
ENSMUSG00000001150	Mcm3ap	192.931	176.557	159.17	235.389	250.041	271.417	266.578	331.594	235.46	0.438077	0.113533	3.8586	0.000114038	0.00689125
ENSMUSG00000001151	Pcnt	244.179	278.825	248.23	244.366	193.541	260.147	219.981	251.734	242.625	-0.106848	0.104757	-1.01996	0.307746	0.66878
ENSMUSG00000001156	Mxd1	371.795	400.389	492.67	618.396	370.253	413.229	376.026	394.962	429.715	-0.220191	0.111643	-1.97228	0.0485773	0.284841
ENSMUSG00000001157	Gmcl1	295.426	282.684	301.287	257.332	318.562	220.702	252.49	275.171	275.457	-0.0785407	0.105356	-0.745481	0.455981	0.768561
ENSMUSG00000001158	Snrnp27	243.174	179.451	211.28	230.402	305.339	231.972	244.905	239.581	235.763	0.192064	0.109907	1.74752	0.0805476	0.361001
ENSMUSG00000001166	Oas1c	31.1504	35.6973	33.1605	42.8887	19.2339	26.2964	27.0912	40.7982	32.0396	-0.144318	0.138528	-1.04179	0.297508	NA
ENSMUSG00000001173	Ocrl	601.906	527.741	613.942	664.277	698.432	615.148	632.851	660.584	626.86	0.102449	0.0838558	1.22173	0.221808	0.584307
ENSMUSG00000001175	Calm1	14394.5	13223.4	14336.7	12313.1	16342.8	14906.3	14417.9	14654.4	14323.6	0.143246	0.0663511	2.1589	0.0308576	0.222452
ENSMUSG00000001211	Agpat3	462.232	552.826	450.035	612.411	557.784	498.693	641.52	660.584	554.511	0.15406	0.102303	1.50591	0.132091	0.466111
ENSMUSG00000001227	Sema6b	69.3347	92.62	99.4814	129.664	102.18	114.577	108.365	120.659	104.61	0.130133	0.12985	1.00218	0.316256	0.673502
ENSMUSG00000001228	Uhrf1	70.3396	116.74	129.8	98.7438	132.233	162.474	150.627	142.36	125.415	0.348731	0.127638	2.73219	0.00629152	0.0909292
ENSMUSG00000001229	Dpp9	449.168	481.431	417.822	418.913	332.988	408.534	428.041	413.191	418.761	-0.136661	0.0925229	-1.47705	0.139661	0.478687
ENSMUSG00000001240	Ramp2	24.1164	29.9086	25.5809	40.8939	37.2658	42.2621	32.5095	29.5136	32.7563	0.109113	0.138859	0.785785	0.431994	NA
ENSMUSG00000001247	Lsr	33.1601	34.7325	33.1605	33.912	21.6382	41.3229	32.5095	32.9858	32.9277	-0.0290672	0.139015	-0.209094	0.834375	NA
ENSMUSG00000001248	Gramd1a	1092.27	1119.16	751.322	857.775	783.783	873.417	870.17	914.054	907.744	-0.126829	0.100208	-1.26567	0.205633	0.562677
ENSMUSG00000001249	Hpn	29.1407	29.9086	24.6335	26.9301	37.2658	43.2013	29.2585	31.2497	31.4485	0.16907	0.138995	1.21637	0.223844	NA
ENSMUSG00000001270	Ckb	2199.62	2839.38	2081.53	1810.3	2849.03	2745.16	2749.22	2831.57	2513.23	0.280571	0.0942024	2.97838	0.00289777	0.0590733
ENSMUSG00000001280	Sp1	226.091	152.437	258.652	239.379	244.031	229.155	212.395	218.748	222.611	0.0338772	0.117278	0.288864	0.772686	0.929738
ENSMUSG00000001281	Itgb7	68.3299	46.31	97.5865	123.679	69.723	47.8971	29.2585	50.3468	66.6414	-0.357501	0.138759	-2.57642	0.00998296	0.120009
ENSMUSG00000001285	Myg1	171.83	172.698	190.436	173.55	167.095	177.501	166.882	180.554	175.068	-0.0265184	0.105591	-0.251144	0.801703	0.942121
ENSMUSG00000001288	Rarg	62.3008	67.5355	56.8465	83.7826	85.3506	112.699	101.863	129.339	87.4646	0.446919	0.131431	3.40041	0.000672845	0.0226753
ENSMUSG00000001289	Pfdn5	494.387	501.692	468.984	433.874	617.89	544.712	494.144	552.946	513.579	0.193636	0.0868916	2.22848	0.0258487	0.202384
ENSMUSG00000001305	Rrp15	163.791	141.824	171.487	110.713	145.457	163.413	184.22	163.193	155.512	0.119858	0.120069	0.998244	0.318161	0.673647
ENSMUSG00000001313	Rnd2	68.3299	52.0988	57.794	55.8551	73.3294	81.7067	58.517	74.6521	65.2854	0.194859	0.13343	1.46038	0.144185	0.485323
ENSMUSG00000001323	Srr	94.456	94.5496	85.2698	88.7697	105.787	92.9766	67.1862	77.2562	88.2814	-0.0584904	0.128991	-0.453446	0.650228	0.879077
ENSMUSG00000001348	Acp5	200.97	211.289	183.804	238.382	224.797	205.676	223.232	262.15	218.787	0.111663	0.107565	1.03809	0.299227	0.661813
ENSMUSG00000001366	Fbxo9	304.47	314.522	313.603	291.244	282.498	262.025	337.015	289.928	299.413	-0.0556868	0.0962851	-0.578353	0.563026	0.832372
ENSMUSG00000001376	Vps50	819.959	807.531	836.591	775.987	641.933	550.346	677.281	668.397	722.253	-0.320963	0.0799918	-4.01245	6.00911e-05	0.00443492
ENSMUSG00000001380	Hars	601.906	569.227	605.415	573.512	514.508	567.251	590.589	610.238	579.081	-0.0363076	0.0795555	-0.456381	0.648116	0.877698
ENSMUSG00000001383	Zmat2	335.62	350.22	322.13	317.177	343.807	324.009	334.847	310.761	329.821	-0.0132625	0.0889116	-0.149165	0.881424	0.968318
ENSMUSG00000001403	Ube2c	88.4269	124.458	105.166	100.739	181.52	168.109	108.365	108.506	123.161	0.285673	0.131485	2.17266	0.0298062	0.218014
ENSMUSG00000001415	Smg5	197.956	200.677	197.068	240.376	212.775	216.945	231.901	222.22	214.99	0.0676643	0.102901	0.657564	0.510818	0.80313
ENSMUSG00000001416	Cct3	1221.9	1327.55	1437.27	1367.45	1160.05	1389.95	1355.64	1256.93	1314.59	-0.0477891	0.0760188	-0.628649	0.529579	0.814127
ENSMUSG00000001418	Glmp	1558.52	1774.25	1582.23	1566.93	1525.49	1519.56	1414.16	1697.03	1579.77	-0.0681088	0.0732294	-0.930074	0.352333	0.697392
ENSMUSG00000001419	Mef2d	685.308	696.58	667.947	799.925	696.028	805.797	702.204	744.785	724.822	0.0460685	0.0815891	0.564641	0.572318	0.837717
ENSMUSG00000001424	Snd1	1083.23	1157.75	1085.77	1049.28	857.112	1065.94	1059.81	1019.09	1047.25	-0.116498	0.0780213	-1.49316	0.135395	0.470697
ENSMUSG00000001435	Col18a1	25.1213	27.0142	45.4772	107.721	45.6806	59.1669	49.8478	57.2911	52.165	0.0181521	0.133976	0.135488	0.892226	NA
ENSMUSG00000001436	Slc19a1	253.222	261.459	230.228	217.436	192.339	245.12	242.737	237.845	235.048	-0.053474	0.104329	-0.51255	0.608266	0.856798
ENSMUSG00000001440	Kpnb1	286.383	303.91	328.762	275.286	257.254	295.835	270.912	267.359	285.712	-0.11141	0.0957985	-1.16296	0.244847	0.606661
ENSMUSG00000001441	Npepps	339.64	386.882	332.552	351.089	292.115	319.314	273.08	355.9	331.321	-0.155175	0.0975097	-1.59138	0.111524	0.429016
ENSMUSG00000001445	Mrpl10	264.276	263.388	292.76	231.4	256.052	278.93	243.821	272.567	262.899	0.000719344	0.0993125	0.00724324	0.994221	0.9985
ENSMUSG00000001467	Cyp51	509.46	378.199	450.035	450.83	363.041	464.883	436.71	348.087	425.156	-0.124438	0.102821	-1.21024	0.226186	0.587633
ENSMUSG00000001472	Tcf25	1858.97	1919.94	1922.36	1879.12	1770.72	2020.13	2013.42	2065.95	1931.33	0.0519298	0.0650451	0.798365	0.424659	0.746365
ENSMUSG00000001473	Tubb6	2873.87	3699.98	3493.22	3189.72	3026.94	3395.99	3455.76	3369.76	3313.16	-0.000685839	0.0773319	-0.00886877	0.992924	0.997775
ENSMUSG00000001482	Def8	416.008	533.53	310.761	404.949	405.115	507.145	455.133	558.155	448.849	0.166333	0.114311	1.45509	0.145643	0.487262
ENSMUSG00000001506	Col1a1	306.48	532.565	615.837	2396.78	560.188	1142.96	1045.72	738.709	917.405	-0.0208899	0.09821	-0.212706	0.831556	0.952487
ENSMUSG00000001517	Foxm1	51.2474	119.634	49.267	56.8525	112.999	117.395	137.623	132.811	97.2287	0.476829	0.138063	3.45371	0.000552927	0.0206579
ENSMUSG00000001518	Itfg2	73.3541	42.4509	45.4772	77.7982	60.1061	75.1326	52.0151	53.819	60.0191	0.00856136	0.138333	0.0618893	0.950651	0.986878
ENSMUSG00000001521	Tulp3	17.0825	9.64792	6.63209	3.98965	6.01061	15.9657	15.1711	16.4929	11.3741	0.11457	0.11399	1.0051	0.314851	NA
ENSMUSG00000001524	Gtf2h4	104.505	124.458	129.8	106.723	145.457	146.509	92.1102	124.131	121.711	0.089752	0.125828	0.71329	0.475666	0.781723
ENSMUSG00000001525	Tubb5	2137.32	2390.76	2118.48	1914.03	2458.34	2591.14	2410.04	2466.12	2310.78	0.198691	0.0706949	2.81054	0.00494589	0.0797578
ENSMUSG00000001542	Ell2	560.707	465.995	571.308	607.424	490.465	411.351	502.813	480.898	511.37	-0.197951	0.093097	-2.12628	0.0334797	0.233321
ENSMUSG00000001552	Jup	599.896	835.51	700.16	658.292	702.039	740.996	800.817	792.528	728.78	0.105558	0.0914398	1.1544	0.248337	0.609769
ENSMUSG00000001555	Fkbp10	13.0631	27.979	37.8977	48.8732	14.4255	44.1404	31.4258	16.4929	29.2872	-0.079568	0.128323	-0.62006	0.535218	NA
ENSMUSG00000001569	Nom1	354.712	365.656	356.238	330.143	311.349	380.359	366.273	368.92	354.207	0.0205424	0.0909113	0.225961	0.821232	0.947961
ENSMUSG00000001576	Ergic1	446.154	402.318	430.139	459.807	512.104	474.275	473.555	421.871	452.528	0.0997232	0.0867581	1.14944	0.250375	0.611937
ENSMUSG00000001627	Ifrd1	2102.15	2414.87	2556.2	2419.72	2237.15	1983.5	2360.19	2295.99	2296.22	-0.0894794	0.0750575	-1.19214	0.233204	0.592054
ENSMUSG00000001630	Stk38l	393.902	390.741	347.711	344.107	375.062	401.02	480.056	453.121	398.215	0.184442	0.0944305	1.9532	0.0507958	0.288875
ENSMUSG00000001632	Brpf1	993.798	927.165	823.327	994.42	884.761	971.089	911.349	1065.96	946.484	0.0343065	0.0822339	0.417182	0.676545	0.890301
ENSMUSG00000001642	Akr1b3	1313.34	1339.13	1277.15	1188.92	1330.75	1278.19	1260.28	1230.02	1277.22	-0.00586438	0.0663741	-0.0883535	0.929596	0.980589
ENSMUSG00000001665	Gstt3	51.2474	43.4156	48.3195	61.8396	20.4361	37.5663	29.2585	39.0621	41.3931	-0.348011	0.139024	-2.50325	0.0123058	NA
ENSMUSG00000001666	Ddt	78.3784	98.4088	86.2172	79.793	120.212	77.9501	86.6919	105.034	91.5857	0.123394	0.129511	0.952765	0.340709	0.68938
ENSMUSG00000001674	Ddx18	212.024	215.149	235.913	188.511	194.744	206.615	219.981	223.956	212.111	-0.00771772	0.103853	-0.0743139	0.940761	0.984704
ENSMUSG00000001687	Ubl3	2674.91	3691.29	3298.99	3682.45	3641.22	3379.09	3399.41	3636.25	3425.45	0.0667917	0.0847853	0.787774	0.430829	0.751243
ENSMUSG00000001700	Gramd3	485.343	474.678	475.616	414.923	383.477	485.545	415.038	415.795	443.802	-0.105867	0.0909088	-1.16454	0.244205	0.605737
ENSMUSG00000001707	Eef1e1	205.994	167.874	186.646	200.48	201.956	182.197	205.893	195.311	193.294	0.0366408	0.105565	0.347094	0.728521	0.912696
ENSMUSG00000001729	Akt1	594.872	1396.05	917.124	2394.79	2774.5	939.158	2342.85	1627.59	1623.37	0.124014	0.11759	1.05463	0.291594	0.65392
ENSMUSG00000001741	Il16	250.208	282.684	259.599	285.26	288.509	235.729	298.003	252.602	269.074	-0.00659923	0.100451	-0.0656962	0.94762	0.985887
ENSMUSG00000001750	Tcirg1	1008.87	1160.64	994.814	1141.04	860.719	1101.63	1039.22	1338.53	1080.68	0.0116035	0.098501	0.117801	0.906225	0.973889
ENSMUSG00000001751	Naglu	1971.52	2214.2	1978.26	1926	1859.68	2199.51	2121.78	2237.83	2063.6	0.0540041	0.0732186	0.737574	0.460773	0.771439
ENSMUSG00000001755	Coasy	372.8	408.107	381.819	339.12	341.402	373.785	330.513	330.726	359.784	-0.110437	0.0908197	-1.216	0.223985	0.585929
ENSMUSG00000001761	Smo	11.0534	20.2606	12.3167	17.9534	20.4361	17.844	22.7566	26.0414	18.5828	0.175487	0.132714	1.32229	0.186072	NA
ENSMUSG00000001767	Crnkl1	395.911	382.058	346.764	346.102	371.455	361.576	321.844	355.9	360.201	-0.0528294	0.0900258	-0.586825	0.557321	0.830185
ENSMUSG00000001768	Rin2	8736.18	8168.9	7935.77	7491.56	6901.38	6725.31	7092.48	7063.3	7514.36	-0.208158	0.0598186	-3.47983	0.000501734	0.0193889
ENSMUSG00000001774	Chordc1	421.033	384.952	463.299	434.872	385.881	284.565	412.87	373.26	395.091	-0.192369	0.101779	-1.89007	0.0587485	0.312748
ENSMUSG00000001783	Rtcb	1202.81	1196.34	1059.24	1077.21	1087.92	1239.69	1134.58	1230.02	1153.48	0.046566	0.0739809	0.629433	0.529066	0.814127
ENSMUSG00000001785	Pwp1	610.949	590.453	554.254	542.592	583.029	555.981	514.733	564.231	564.528	-0.0467043	0.0794851	-0.587586	0.55681	0.830185
ENSMUSG00000001786	Fbxo7	268.295	228.656	239.703	197.488	207.967	191.588	210.228	210.068	219.249	-0.155781	0.105691	-1.47393	0.140501	0.480102
ENSMUSG00000001794	Capns1	577.789	517.129	639.523	697.191	691.22	619.844	650.189	592.877	623.22	0.0609518	0.0909603	0.670093	0.502799	0.797604
ENSMUSG00000001829	Clpb	350.693	315.487	286.128	310.195	323.371	292.078	312.091	265.623	306.958	-0.0725439	0.0970235	-0.747694	0.454645	0.767602
ENSMUSG00000001833	2007-09-01	3932.99	3593.85	4113.79	3418.13	4336.05	3541.56	4062.6	3420.98	3802.49	0.0254084	0.0811263	0.313196	0.754132	0.921543
ENSMUSG00000001844	Zdhhc4	327.581	302.945	298.444	299.224	300.53	373.785	287.167	306.421	312.012	0.0413592	0.0977625	0.423058	0.672253	0.888704
ENSMUSG00000001847	Rac1	5391.03	5985.57	6152.69	5937.6	6081.53	6007.79	5937.31	5769.91	5907.93	0.0190168	0.0582221	0.326625	0.743951	0.918237
ENSMUSG00000001855	Nup214	446.154	430.297	355.291	468.784	413.53	519.354	450.798	549.474	454.21	0.159736	0.100254	1.59332	0.111088	0.428367
ENSMUSG00000001865	Cpa3	6.02911	35.6973	0.947442	19.9482	4.80848	15.9657	16.2547	25.1734	15.603	0.000291374	0.0987373	0.002951	0.997645	NA
ENSMUSG00000001870	Ltbp1	3.01455	13.5071	7.57954	19.9482	6.01061	21.6006	13.0038	5.20829	11.2341	0.0108892	0.105362	0.10335	0.917685	NA
ENSMUSG00000001891	Ugp2	1121.41	1079.6	1076.29	1112.11	1077.1	1057.49	1276.54	1015.62	1102.02	0.0103285	0.0771439	0.133886	0.893493	0.970537
ENSMUSG00000001909	Trmt1	251.213	246.987	234.966	231.4	313.754	260.147	299.087	259.546	262.137	0.193923	0.0985266	1.96823	0.0490412	0.285804
ENSMUSG00000001910	Nacc1	49.2377	81.0425	48.3195	63.8344	69.723	78.8893	71.5208	109.374	71.4927	0.265192	0.136813	1.93835	0.0525803	0.292282
ENSMUSG00000001911	Nfix	111.538	100.338	185.699	160.583	193.541	142.752	152.794	160.589	150.979	0.146544	0.129804	1.12896	0.258913	0.620249
ENSMUSG00000001918	Slc1a5	598.891	750.608	654.682	638.344	641.933	741.935	707.623	721.348	681.92	0.0820426	0.0837972	0.979061	0.32755	0.680198
ENSMUSG00000001924	Uba1	2873.87	2980.24	3135.09	2757.84	2644.67	2948.96	2928.02	3090.25	2919.87	-0.0151285	0.0667694	-0.226578	0.820752	0.947961
ENSMUSG00000001930	Vwf	43.2086	43.4156	22.7386	79.793	85.3506	86.4025	63.9353	54.687	59.9414	0.282435	0.138608	2.03766	0.0415841	0.261651
ENSMUSG00000001942	Siae	553.673	542.213	490.775	476.763	407.519	484.605	395.532	460.065	476.393	-0.208741	0.0897101	-2.32684	0.019974	0.17632
ENSMUSG00000001946	Esam	1.00485	0.964792	4.73721	20.9457	16.8297	17.844	6.50189	9.54852	9.79708	0.107347	0.0920492	1.16619	0.243538	NA
ENSMUSG00000001948	Spa17	9.04366	3.85917	7.57954	7.9793	1.20212	3.75663	10.8365	10.4166	6.83418	-0.0143316	0.098189	-0.145959	0.883954	NA
ENSMUSG00000001962	Fam50a	755.648	694.65	734.268	617.398	717.666	663.985	705.455	678.813	695.985	-0.0179839	0.0798276	-0.225285	0.821758	0.948185
ENSMUSG00000001964	Emd	103.5	82.9721	104.219	110.713	110.595	112.699	135.456	85.9367	105.761	0.100184	0.127518	0.785648	0.432073	0.75136
ENSMUSG00000001983	Taco1	17.0825	17.3663	14.2116	16.956	24.0424	10.3307	24.9239	19.097	18.0013	0.0813323	0.131117	0.620305	0.535057	NA
ENSMUSG00000001995	Sipa1l2	448.164	367.586	405.505	549.574	451.997	515.598	569.999	677.945	498.296	0.260548	0.111314	2.34066	0.0192498	0.173881
ENSMUSG00000001998	Ap4e1	146.708	123.493	142.116	124.677	98.5739	116.456	134.372	103.298	123.712	-0.185005	0.120314	-1.53768	0.124126	0.449751
ENSMUSG00000001999	Blvra	1538.43	1517.62	1573.7	1376.43	1725.04	1595.63	1601.63	1480.02	1551.06	0.0847479	0.0701919	1.20737	0.227288	0.588023
ENSMUSG00000002010	Idh3g	888.288	926.2	946.495	1000.4	918.42	840.546	849.581	802.944	896.61	-0.13201	0.072753	-1.8145	0.0696014	0.337112
ENSMUSG00000002014	Ssr4	559.702	492.044	512.566	476.763	708.049	566.312	525.57	552.078	549.136	0.176016	0.0935256	1.88201	0.0598344	0.315235
ENSMUSG00000002015	Bcap31	1688.15	1727.94	1791.61	1613.81	1917.38	1800.37	1781.52	1697.9	1752.34	0.0719264	0.0647982	1.11001	0.266996	0.627193
ENSMUSG00000002017	Fam98a	158.766	168.839	168.645	142.63	151.467	162.474	163.631	211.804	166.032	0.0895477	0.11526	0.776917	0.437208	0.75501
ENSMUSG00000002028	Kmt2a	188.912	146.648	185.699	190.506	180.318	189.71	159.296	178.818	177.488	-0.00461309	0.110842	-0.0416188	0.966803	0.991292
ENSMUSG00000002031	Ift46	192.931	175.592	171.487	181.529	192.339	215.067	203.726	197.047	191.215	0.137798	0.103492	1.33149	0.183029	0.535968
ENSMUSG00000002043	Trappc6a	184.893	196.818	198.015	201.477	283.701	222.58	223.232	200.519	213.904	0.199799	0.108403	1.84311	0.0653133	0.327987
ENSMUSG00000002052	Supt6	287.387	284.614	287.075	291.244	248.839	298.652	321.844	314.233	291.736	0.0381813	0.0966358	0.395105	0.692765	0.896896
ENSMUSG00000002055	Spag5	26.1261	94.5496	48.3195	61.8396	69.723	95.7941	56.3497	89.4089	67.7638	0.199806	0.138639	1.4412	0.149529	0.494804
ENSMUSG00000002058	Unc119	121.587	129.282	109.903	125.674	127.425	108.942	122.452	121.527	120.849	-0.0155114	0.117164	-0.13239	0.894675	0.970537
ENSMUSG00000002059	Rab34	335.62	306.804	302.234	257.332	301.732	280.808	288.251	348.087	302.609	0.0184838	0.101097	0.182833	0.854929	0.962343
ENSMUSG00000002064	Sdf2	384.858	427.403	397.926	364.055	413.53	367.211	409.619	390.621	394.403	0.00360733	0.0875619	0.0411975	0.967138	0.991292
ENSMUSG00000002068	Ccne1	12.0582	29.9086	20.8437	12.9664	38.4679	59.1669	30.3422	35.59	29.918	0.422144	0.135443	3.11676	0.0018285	NA
ENSMUSG00000002083	Bbc3	155.752	130.247	147.801	111.71	180.318	115.516	123.536	145.832	138.839	0.033502	0.124932	0.268163	0.788574	0.93573
ENSMUSG00000002100	Mybpc3	10.0485	7.71834	14.2116	19.9482	16.8297	15.9657	9.75284	19.097	14.1965	0.0703721	0.124438	0.56552	0.57172	NA
ENSMUSG00000002102	Psmc3	1452.01	1596.73	1514.01	1436.27	1664.94	1606.9	1756.59	1564.22	1573.96	0.12706	0.0663789	1.91416	0.0555998	0.303223
ENSMUSG00000002103	Acp2	1976.54	2011.59	1856.04	1836.24	1765.92	1942.18	1827.03	1743.91	1869.93	-0.0728538	0.0643984	-1.1313	0.25793	0.618812
ENSMUSG00000002104	Rapsn	2.0097	6.75355	3.78977	3.98965	0	5.63495	3.25095	6.07633	3.93811	-0.0102213	0.0817674	-0.125004	0.90052	NA
ENSMUSG00000002105	Slc39a13	293.417	342.501	374.24	318.175	329.381	277.052	337.015	322.046	324.228	-0.0617166	0.0982607	-0.628091	0.529944	0.814127
ENSMUSG00000002107	Celf2	1957.45	1734.7	2016.16	1601.84	1638.49	1801.3	1737.09	1535.58	1752.83	-0.112012	0.0801654	-1.39726	0.162335	0.508712
ENSMUSG00000002108	Nr1h3	224.082	223.832	230.228	188.511	133.435	179.379	158.213	205.727	192.926	-0.27249	0.115276	-2.36382	0.0180878	0.167726
ENSMUSG00000002109	Ddb2	44.2134	33.7677	48.3195	45.881	25.2445	23.4789	26.0076	19.9651	33.3597	-0.42411	0.139062	-3.0498	0.00228991	NA
ENSMUSG00000002111	Spi1	3465.73	3653.67	3377.63	3217.65	3898.48	3572.56	3439.5	3356.74	3497.74	0.053069	0.0660984	0.802879	0.422045	0.744095
ENSMUSG00000002129	Sf3a1	359.737	356.008	334.447	382.009	329.381	416.986	372.775	374.997	365.792	0.0561528	0.0921429	0.609411	0.542252	0.821821
ENSMUSG00000002147	Stat6	3738.05	4139.92	3767.98	3608.64	3228.9	3709.67	3544.62	3604.13	3667.74	-0.10761	0.0657475	-1.63671	0.101691	0.407291
ENSMUSG00000002204	Napsa	24.1164	27.0142	70.1107	133.653	84.1485	40.3838	29.2585	29.5136	54.7749	-0.0698976	0.0984774	-0.709783	0.477838	0.783972
ENSMUSG00000002205	Vrk3	202.98	166.909	159.17	189.508	188.733	142.752	182.053	164.061	174.521	-0.0695621	0.113604	-0.61232	0.540326	0.820141
ENSMUSG00000002210	Smg9	340.645	344.431	321.183	325.156	366.647	368.15	394.448	395.83	357.061	0.17553	0.0864146	2.03125	0.0422294	0.263638
ENSMUSG00000002221	Paxip1	256.237	305.839	240.65	330.143	330.583	277.991	327.262	301.213	296.24	0.103824	0.104477	0.993755	0.320342	0.675256
ENSMUSG00000002222	Rmnd5a	255.232	274.001	287.075	368.045	384.679	250.755	339.182	346.351	313.165	0.121574	0.114733	1.05962	0.289317	0.652154
ENSMUSG00000002227	Mov10	80.3881	75.2538	71.0582	73.8085	61.3082	92.9766	63.9353	95.4852	76.7767	0.0475703	0.132955	0.357792	0.720499	0.909822
ENSMUSG00000002233	Rhoc	587.838	693.686	461.404	464.794	792.198	673.376	559.163	605.897	604.794	0.201811	0.110895	1.81983	0.0687844	0.335138
ENSMUSG00000002250	Ppard	20.097	13.5071	23.6861	14.9612	12.0212	13.1482	20.5893	11.2846	16.1618	-0.109001	0.129145	-0.84402	0.398658	NA
ENSMUSG00000002257	Def6	237.145	326.1	199.91	228.407	256.052	239.485	276.33	323.782	260.901	0.111534	0.117808	0.946742	0.34377	0.691071
ENSMUSG00000002265	Peg3	8.03881	1.92958	6.63209	15.9586	3.60636	3.75663	4.3346	3.47219	5.96611	-0.141186	0.0945592	-1.4931	0.135411	NA
ENSMUSG00000002274	Metrn	3.01455	10.6127	6.63209	8.97671	10.8191	18.7832	7.58554	15.6249	10.2561	0.181868	0.114015	1.59513	0.110684	NA
ENSMUSG00000002279	Lmf1	197.956	207.43	210.332	225.415	187.531	205.676	218.897	181.422	204.332	-0.0707396	0.103866	-0.681066	0.49583	0.794997
ENSMUSG00000002280	Narfl	291.407	286.543	282.338	266.309	275.286	264.843	320.76	283.852	283.917	0.0190992	0.095153	0.200721	0.840917	0.957343
ENSMUSG00000002289	Angptl4	40.194	46.31	39.7926	48.8732	38.4679	53.532	50.9315	28.6456	43.3433	-0.0171862	0.138936	-0.123699	0.901554	NA
ENSMUSG00000002297	Dbf4	135.655	183.311	162.96	144.625	143.052	137.117	156.045	190.102	156.608	0.00179244	0.119136	0.0150454	0.987996	0.996579
ENSMUSG00000002307	Daxx	259.252	238.304	268.126	232.397	270.477	274.234	254.657	278.643	259.511	0.0965116	0.0960264	1.00505	0.314871	0.672293
ENSMUSG00000002308	Cd320	74.359	66.5707	72.953	59.8447	52.8933	55.4103	63.9353	62.4994	63.5582	-0.142387	0.132762	-1.0725	0.283496	0.645643
ENSMUSG00000002319	Ipo4	395.911	447.664	421.612	457.812	372.658	377.541	460.551	407.982	417.716	-0.0790989	0.0908976	-0.870198	0.384192	0.718339
ENSMUSG00000002320	Tm9sf1	612.959	752.538	675.526	624.38	623.901	650.836	612.262	644.091	649.562	-0.06724	0.0814868	-0.825165	0.409278	0.735949
ENSMUSG00000002325	Irf9	496.396	454.417	488.88	451.828	343.807	344.671	324.011	389.753	411.72	-0.381206	0.0876977	-4.34682	1.38127e-05	0.0017767
ENSMUSG00000002326	Gmpr2	419.023	481.431	466.142	487.735	508.497	444.222	406.368	509.544	465.37	0.00975836	0.0913101	0.106871	0.914892	0.977315
ENSMUSG00000002329	Mdp1	289.397	314.522	295.602	310.195	296.924	280.808	267.661	268.227	290.417	-0.106024	0.0919553	-1.153	0.248912	0.61025
ENSMUSG00000002332	Dhrs1	680.284	711.052	659.42	632.359	691.22	647.08	594.923	643.223	657.445	-0.0542208	0.0774459	-0.700112	0.483857	0.788632
ENSMUSG00000002342	Tmem161a	180.873	219.008	193.278	175.545	186.329	177.501	183.137	175.346	186.377	-0.0755409	0.10647	-0.709506	0.47801	0.783972
ENSMUSG00000002343	Armc6	44.2134	80.0778	36.0028	40.8939	55.2976	50.7145	41.1787	61.6314	51.2513	0.0280339	0.139077	0.201571	0.840252	NA
ENSMUSG00000002345	Borcs8	96.4657	79.113	105.166	96.749	86.5527	109.881	86.6919	87.6728	93.5366	-0.0163339	0.126611	-0.129009	0.897351	0.971337
ENSMUSG00000002346	Slc25a42	26.1261	19.2958	24.6335	23.9379	30.053	16.9048	18.422	32.1178	23.9364	0.0211201	0.135964	0.155336	0.876556	NA
ENSMUSG00000002365	Snx9	2496.05	2370.49	2472.82	2359.88	2239.55	2481.26	2446.88	2467.86	2416.85	-0.00838364	0.060134	-0.139416	0.889121	0.970147
ENSMUSG00000002372	Ranbp3	471.275	530.636	457.615	488.732	389.487	470.518	443.212	409.718	457.649	-0.163802	0.0876408	-1.86902	0.0616204	0.318699
ENSMUSG00000002379	Ndufa11	519.508	498.798	518.251	416.918	712.858	606.696	508.231	531.245	539.063	0.228712	0.100138	2.28396	0.0223739	0.186706
ENSMUSG00000002393	Nr2f6	179.868	226.726	217.912	199.482	203.158	257.329	229.734	237.845	219.007	0.143496	0.106113	1.3523	0.17628	0.526653
ENSMUSG00000002395	Use1	472.28	475.643	468.984	400.96	560.188	489.301	454.049	453.989	471.924	0.0915461	0.0909795	1.00623	0.314306	0.672293
ENSMUSG00000002396	Ocel1	169.82	187.17	165.802	146.62	204.361	201.919	172.3	228.297	184.536	0.217627	0.11114	1.95813	0.0502142	0.287797
ENSMUSG00000002409	Dyrk1b	57.2765	44.3804	57.794	65.8292	67.3188	41.3229	46.5969	65.1036	55.7028	-0.0192656	0.137616	-0.139995	0.888664	0.97
ENSMUSG00000002413	Braf	177.859	177.522	217.912	281.27	248.839	220.702	224.315	259.546	225.996	0.121662	0.117398	1.03633	0.30005	0.66258
ENSMUSG00000002416	Ndufb2	249.203	245.057	248.23	227.41	331.785	258.268	239.486	272.567	259.001	0.151013	0.103568	1.4581	0.144812	0.486345
ENSMUSG00000002428	Hltf	343.659	337.677	447.193	391.983	317.36	290.2	338.098	302.081	346.031	-0.24401	0.099484	-2.45275	0.0141768	0.145381
ENSMUSG00000002455	Prpf6	525.537	603.96	541.937	471.776	399.104	548.468	540.741	454.857	510.798	-0.119013	0.0996683	-1.19409	0.232441	0.591733
ENSMUSG00000002458	Rgs19	988.773	906.905	890.596	901.661	947.271	859.329	773.725	847.215	889.434	-0.0975008	0.0768011	-1.26952	0.204255	0.56178
ENSMUSG00000002475	Abhd3	43.2086	77.1834	61.5837	59.8447	62.5103	72.3152	85.6083	59.0272	65.1602	0.123069	0.136311	0.90285	0.366606	0.704441
ENSMUSG00000002477	Snrpd1	177.859	159.191	184.751	175.545	337.796	222.58	237.319	210.936	213.247	0.40244	0.117946	3.41209	0.000644678	0.02242
ENSMUSG00000002486	Tchp	64.3105	68.5002	60.6363	68.8214	73.3294	64.8019	57.4334	74.6521	66.5607	0.0293206	0.131912	0.222274	0.824101	0.948523
ENSMUSG00000002489	Tiam1	79.3832	84.9017	87.1647	75.8033	62.5103	93.9158	67.1862	65.1036	76.9961	-0.11706	0.131529	-0.89	0.373466	0.709727
ENSMUSG00000002496	Tsc2	652.148	810.425	694.475	868.746	911.208	910.044	860.417	938.36	830.728	0.230832	0.0866972	2.66251	0.0077561	0.1027
ENSMUSG00000002504	Slc9a3r2	2026.78	2353.13	1622.02	1423.31	1729.85	1877.38	1938.65	1962.66	1866.72	0.0136265	0.103253	0.131973	0.895006	0.970595
ENSMUSG00000002524	Puf60	1600.73	1641.11	1487.48	1444.25	1426.92	1482.93	1485.68	1424.47	1499.2	-0.0800275	0.0656579	-1.21886	0.222899	0.585638
ENSMUSG00000002546	Golga2	444.144	504.586	429.191	483.745	427.955	462.066	491.977	507.808	468.934	0.0210462	0.0873042	0.241067	0.809503	0.945065
ENSMUSG00000002550	Uck1	329.591	415.825	326.868	316.18	377.466	348.428	338.098	292.532	343.123	-0.0308266	0.102257	-0.301463	0.763061	0.924805
ENSMUSG00000002580	Mien1	299.446	267.247	286.128	241.374	336.594	265.782	315.342	257.81	283.715	0.0820839	0.103913	0.789932	0.429568	0.75112
ENSMUSG00000002602	Axl	770.721	812.355	540.989	617.398	906.399	1195.55	953.611	1039.92	854.618	0.481284	0.104594	4.60142	4.19611e-06	0.000876994
ENSMUSG00000002603	Tgfb1	531.566	581.77	582.677	669.264	667.177	791.71	800.817	809.888	679.359	0.336008	0.087177	3.85432	0.000116051	0.00696618
ENSMUSG00000002608	Ccdc97	299.446	275.931	261.494	307.203	240.424	278.93	188.555	265.623	264.701	-0.186385	0.108109	-1.72405	0.084698	0.36984
ENSMUSG00000002617	Zfp40	178.863	112.881	102.324	147.617	112.999	85.4634	109.449	109.374	119.871	-0.254394	0.130277	-1.95271	0.0508535	0.288875
ENSMUSG00000002625	Akap8l	294.421	238.304	216.017	229.405	233.211	251.694	224.315	252.602	242.496	-0.0177481	0.105384	-0.168414	0.866258	0.965485
ENSMUSG00000002635	Pdcd2l	257.242	227.691	235.913	201.477	191.137	204.736	198.308	195.311	213.977	-0.1866	0.10331	-1.80621	0.0708861	0.338747
ENSMUSG00000002658	Gtf2f1	533.576	516.164	492.67	491.724	500.082	488.362	533.155	538.19	511.74	0.0170786	0.0794987	0.214829	0.829901	0.95178
ENSMUSG00000002660	Clpp	156.757	184.275	159.17	153.601	198.35	173.744	193.973	171.873	173.968	0.138419	0.10877	1.27259	0.203165	0.560791
ENSMUSG00000002661	Alkbh7	54.262	51.134	48.3195	55.8551	56.4997	53.532	63.9353	61.6314	55.6461	0.106559	0.134486	0.792341	0.428162	0.750179
ENSMUSG00000002668	Dennd1c	366.771	354.079	342.027	375.027	295.722	306.165	282.832	330.726	331.669	-0.210832	0.0902778	-2.33537	0.019524	0.174707
ENSMUSG00000002679	Med6	153.742	135.071	159.17	142.63	151.467	175.623	156.045	153.644	153.424	0.0880503	0.11119	0.791894	0.428422	0.75049
ENSMUSG00000002699	Lcp2	2155.41	2159.2	2020.89	1954.93	1923.39	1967.54	2064.35	1957.45	2025.4	-0.063755	0.0618129	-1.03142	0.302345	0.663967
ENSMUSG00000002718	Cse1l	760.672	702.369	665.104	756.038	641.933	648.958	727.128	677.077	697.41	-0.0890064	0.0779547	-1.14177	0.253549	0.615187
ENSMUSG00000002728	Naa20	817.949	747.714	811.01	760.028	960.495	752.265	782.394	644.091	784.493	-0.00144882	0.0945857	-0.0153176	0.987779	0.996579
ENSMUSG00000002731	Prkra	216.043	200.677	191.383	183.524	173.105	200.041	170.133	179.686	189.324	-0.10582	0.105846	-0.999756	0.317429	0.673647
ENSMUSG00000002732	Fkbp7	167.81	173.663	187.594	188.511	235.616	196.284	231.901	211.804	199.148	0.234999	0.104738	2.24367	0.0248535	0.197337
ENSMUSG00000002733	Plekha3	279.349	454.417	432.034	591.465	491.667	401.96	507.148	450.517	451.07	0.0547916	0.12217	0.448488	0.653801	0.880009
ENSMUSG00000002741	Ykt6	1202.81	1243.62	1124.61	1205.87	1255.01	1198.37	1472.68	1444.43	1268.42	0.154934	0.0776861	1.99436	0.0461128	0.276431
ENSMUSG00000002748	Baz1b	340.645	446.699	383.714	401.957	365.445	399.142	396.615	421.003	394.402	0.00872338	0.0934301	0.0933679	0.925611	0.979686
ENSMUSG00000002763	Pex6	192.931	282.684	219.807	229.405	181.52	228.215	170.133	230.901	216.95	-0.143401	0.116549	-1.23038	0.218553	0.579182
ENSMUSG00000002767	Mrpl2	296.431	276.895	322.13	267.306	272.881	303.348	255.741	294.268	286.125	-0.0376286	0.09744	-0.386172	0.699369	0.898819
ENSMUSG00000002768	Mea1	322.557	296.191	278.548	316.18	299.328	306.165	339.182	313.365	308.94	0.0460034	0.0925929	0.496835	0.619305	0.863052
ENSMUSG00000002771	Grin2d	14.0679	12.5423	5.68465	8.97671	7.21273	17.844	28.1749	21.7012	14.5255	0.21785	0.120998	1.80045	0.0717902	NA
ENSMUSG00000002778	Kdelr1	298.441	218.043	326.868	272.294	405.115	241.364	309.924	356.768	303.602	0.175745	0.119725	1.4679	0.142131	0.481681
ENSMUSG00000002781	Tmem143	13.0631	15.4367	20.8437	14.9612	18.0318	17.844	27.0912	21.7012	18.6216	0.140513	0.133271	1.05434	0.291727	NA
ENSMUSG00000002797	Ggct	16.0776	13.5071	16.1065	17.9534	30.053	17.844	17.3384	20.8331	18.7141	0.151444	0.133249	1.13655	0.255728	NA
ENSMUSG00000002799	Jag2	11.0534	7.71834	12.3167	15.9586	7.21273	17.844	17.3384	6.94438	12.0483	0.0169377	0.118376	0.143084	0.886224	NA
ENSMUSG00000002803	Btbd6	125.606	84.9017	76.7428	102.733	85.3506	88.2808	97.5284	86.8048	93.4936	-0.0830268	0.129774	-0.639781	0.522315	0.810279
ENSMUSG00000002804	Nudt14	95.4609	91.6553	101.376	80.7904	126.223	95.7941	94.2775	94.6172	97.5243	0.104906	0.125895	0.833286	0.404684	0.733744
ENSMUSG00000002808	Epdr1	12.0582	6.75355	18.9488	17.9534	4.80848	11.2699	11.9201	3.47219	10.8981	-0.168286	0.11276	-1.49243	0.135586	NA
ENSMUSG00000002812	Flii	2435.76	2855.78	2434.93	2435.68	2258.79	2479.38	2403.53	2532.1	2479.49	-0.0657128	0.0701406	-0.936872	0.348824	0.695303
ENSMUSG00000002814	Top3a	183.888	215.149	223.596	217.436	151.467	197.223	173.384	184.026	193.271	-0.200152	0.108582	-1.84332	0.065282	0.327987
ENSMUSG00000002820	Atg4d	187.907	216.113	163.907	187.513	186.329	231.033	179.886	217.88	196.321	0.0913269	0.111229	0.821068	0.411608	0.737242
ENSMUSG00000002825	Qtrt1	115.558	85.8665	108.956	86.7749	94.9676	112.699	111.616	87.6728	100.514	0.0242703	0.126696	0.191564	0.848084	0.959867
ENSMUSG00000002833	Hdgfrp2	236.14	306.804	264.336	238.382	225.999	223.52	243.821	270.831	251.229	-0.0954404	0.105305	-0.906319	0.364767	0.703835
ENSMUSG00000002835	Chaf1a	38.1843	54.0284	48.3195	64.8318	90.1591	75.1326	61.768	65.9716	62.2994	0.303683	0.136344	2.22734	0.0259248	0.202659
ENSMUSG00000002844	Adprh	731.532	896.292	798.694	735.093	733.294	833.033	676.197	739.577	767.964	-0.0747608	0.0858698	-0.870629	0.383957	0.718339
ENSMUSG00000002845	Tmem39a	56.2717	86.8313	71.0582	63.8344	73.3294	74.1935	78.0227	52.0829	69.453	-0.0056072	0.134933	-0.0415556	0.966853	0.991292
ENSMUSG00000002846	Timmdc1	12.0582	22.1902	18.0014	11.9689	18.0318	16.9048	7.58554	10.4166	14.6447	-0.0806366	0.125051	-0.64483	0.519037	NA
ENSMUSG00000002847	Pla1a	14.0679	7.71834	15.1591	8.97671	2.40424	6.5741	19.5057	1.7361	9.51777	-0.0934734	0.100333	-0.93163	0.351528	NA
ENSMUSG00000002870	Mcm2	292.412	310.663	294.654	302.216	269.275	379.42	348.935	287.324	310.612	0.0838889	0.103014	0.814348	0.415446	0.739454
ENSMUSG00000002871	Tpra1	820.963	822.003	768.376	775.987	595.05	669.62	554.828	652.772	707.45	-0.331957	0.0790303	-4.20037	2.66476e-05	0.00266595
ENSMUSG00000002881	Nab1	545.634	930.06	817.643	1158	1115.57	870.599	1119.41	1013.01	946.24	0.148117	0.137214	1.07946	0.280384	0.642112
ENSMUSG00000002885	Adgre5	9604.37	11535.1	8979.86	8669.51	8753.85	9222.53	8986.7	10150.9	9487.85	-0.0575842	0.0811601	-0.709514	0.478006	0.783972
ENSMUSG00000002897	Il17ra	1823.8	1782.94	1426.85	1759.44	1547.13	1845.45	1653.65	1675.33	1689.32	-0.0130704	0.0817306	-0.15992	0.872944	0.966171
ENSMUSG00000002900	Lamb1	7.03396	5.78875	19.8963	16.956	1.20212	13.1482	9.75284	1.7361	9.43928	-0.132739	0.0980261	-1.35412	0.175699	NA
ENSMUSG00000002910	Arrdc2	97.4706	121.564	74.8479	80.7904	90.1591	92.9766	58.517	86.8048	87.8913	-0.119135	0.133951	-0.889392	0.373793	0.709783
ENSMUSG00000002944	Cd36	13777.5	12065.7	16111.3	14600.1	12065.7	11093.3	11256.9	9433.94	12550.6	-0.329388	0.0845629	-3.89518	9.81266e-05	0.00617855
ENSMUSG00000002948	Map2k7	82.3978	108.057	90.007	107.721	110.595	146.509	91.0265	116.318	106.579	0.18213	0.128317	1.41938	0.155787	0.500633
ENSMUSG00000002949	Timm44	285.378	258.564	279.495	244.366	245.233	252.633	236.235	286.456	261.045	-0.0528798	0.0992386	-0.532855	0.594134	0.848671
ENSMUSG00000002957	Ap2a2	2014.73	2408.12	2363.87	2685.03	2061.64	2694.44	2191.14	2288.17	2338.39	-0.0318238	0.0883858	-0.360056	0.718805	0.908893
ENSMUSG00000002963	Pnkp	444.144	458.276	385.609	366.05	403.913	385.055	467.053	469.614	422.464	0.0532942	0.0962272	0.553838	0.57969	0.842376
ENSMUSG00000002968	Med25	463.236	496.868	425.401	418.913	490.465	581.339	549.41	559.023	498.082	0.245006	0.0866011	2.82913	0.00466753	0.077544
ENSMUSG00000002980	Bcam	4.0194	9.64792	16.1065	20.9457	18.0318	23.4789	20.5893	17.361	16.2726	0.177917	0.124482	1.42926	0.152928	NA
ENSMUSG00000002981	Clptm1	2247.85	2135.09	2185.75	2171.37	2132.56	2362.92	2369.94	2212.65	2227.27	0.052327	0.0606797	0.862348	0.388496	0.720795
ENSMUSG00000002983	Relb	360.742	561.509	460.457	430.882	426.753	530.624	539.657	515.62	478.281	0.124561	0.105914	1.17606	0.23957	0.598647
ENSMUSG00000002984	Tomm40	219.058	270.142	265.284	228.407	228.403	257.329	273.08	283.852	253.194	0.0729582	0.103202	0.706947	0.479599	0.785463
ENSMUSG00000002985	Apoe	75406	76802.3	76635.7	66079.6	83287.8	63259.8	76465.5	81344.7	74910.2	0.0413027	0.0797949	0.51761	0.60473	0.854395
ENSMUSG00000002996	Hbp1	2537.25	2467.94	2765.58	2746.87	2270.81	2055.82	2188.97	1928.8	2370.25	-0.296555	0.0694113	-4.27243	1.93355e-05	0.00214934
ENSMUSG00000002997	Prkar2b	786.798	763.151	837.539	789.95	780.177	688.403	600.341	555.551	725.239	-0.244057	0.0914339	-2.66922	0.00760275	0.101415
ENSMUSG00000003031	Cdkn1b	99.4803	73.3242	74.8479	94.7542	73.3294	92.0375	52.0151	70.3119	78.7626	-0.155718	0.134099	-1.16122	0.245552	0.607232
ENSMUSG00000003032	Klf4	1246.02	1179.94	1328.31	1315.59	1295.89	1232.18	1279.79	1537.31	1301.88	0.0704887	0.0784992	0.897955	0.36921	0.70596
ENSMUSG00000003033	Ap1m1	1203.81	1233	1175.78	1073.22	1275.45	1222.78	1297.13	1289.05	1221.28	0.110096	0.0676657	1.62706	0.103724	0.411967
ENSMUSG00000003037	Rab8a	1414.83	1470.34	1368.11	1171.96	1249	1226.54	1289.54	1252.59	1305.36	-0.104007	0.0750096	-1.38658	0.165569	0.512185
ENSMUSG00000003038	Hmgn2	755.648	722.629	758.901	742.075	1025.41	982.359	887.508	840.27	839.35	0.297182	0.0777164	3.82392	0.000131345	0.00743792
ENSMUSG00000003039	Fam32a	911.4	806.566	774.06	801.919	794.602	770.109	733.63	741.313	791.7	-0.106894	0.0755747	-1.41442	0.157239	0.501535
ENSMUSG00000003062	Stard3nl	1120.41	1063.2	1187.14	1044.29	1154.04	1124.17	1201.77	1130.2	1128.15	0.0577495	0.0684774	0.843337	0.39904	0.72909
ENSMUSG00000003068	Stk11	96.4657	83.9369	76.7428	87.7723	70.9251	116.456	71.5208	89.4089	86.6535	0.0149891	0.13211	0.113459	0.909667	0.975522
ENSMUSG00000003070	Efna2	5.02426	7.71834	3.78977	3.98965	6.01061	4.69579	9.75284	3.47219	5.55668	0.0289435	0.0972906	0.297496	0.766088	NA
ENSMUSG00000003072	Atp5d	866.182	949.356	876.384	788.953	1006.18	972.968	902.68	982.63	918.166	0.138626	0.0752547	1.8421	0.0654612	0.328364
ENSMUSG00000003099	Ppp5c	256.237	377.234	341.079	362.061	318.562	324.009	295.836	305.553	322.571	-0.0865781	0.10423	-0.830645	0.406174	0.733783
ENSMUSG00000003119	Cdk12	187.907	171.733	187.594	193.498	179.116	198.162	154.962	155.381	178.544	-0.0868337	0.109715	-0.791449	0.428682	0.750506
ENSMUSG00000003123	Lipe	86.4172	82.9721	82.4275	133.653	93.7654	111.76	111.616	133.679	104.536	0.154523	0.131222	1.17757	0.238969	0.598647
ENSMUSG00000003131	Pafah1b2	1102.32	1085.39	1270.52	1122.09	1117.97	1046.22	1123.74	1066.83	1116.89	-0.068513	0.0718745	-0.95323	0.340473	0.689369
ENSMUSG00000003134	Tbc1d8	52.2523	41.4861	54.9516	75.8033	82.9463	85.4634	50.9315	63.3675	63.4002	0.187948	0.137874	1.36319	0.172822	0.522978
ENSMUSG00000003135	Cnot11	209.009	169.803	215.069	177.539	204.361	169.048	199.391	227.428	196.456	0.0424757	0.111831	0.379821	0.704078	0.900953
ENSMUSG00000003153	Slc2a3	69.3347	82.0073	70.1107	87.7723	61.3082	52.5928	47.6806	70.3119	67.6398	-0.262253	0.133646	-1.9623	0.0497273	0.287446
ENSMUSG00000003154	Foxj2	326.577	354.079	331.605	440.856	432.764	414.169	444.296	484.371	403.589	0.248056	0.0981225	2.52803	0.0114706	0.130077
ENSMUSG00000003161	Sri	1742.41	1486.74	1610.65	1472.18	1721.44	1603.14	1631.98	1414.05	1585.32	0.0112675	0.0772675	0.145824	0.88406	0.969156
ENSMUSG00000003166	Dgcr2	321.552	403.283	394.136	370.04	379.87	392.568	396.615	381.941	380.001	0.0512837	0.0903723	0.567472	0.570393	0.836453
ENSMUSG00000003184	Irf3	307.484	356.008	272.863	298.226	323.371	296.774	325.095	298.608	309.804	0.00772001	0.0971576	0.0794587	0.936668	0.983684
ENSMUSG00000003190	Bcl2l12	25.1213	30.8733	23.6861	33.912	51.6912	46.0187	20.5893	38.1941	33.7608	0.201636	0.138012	1.461	0.144016	NA
ENSMUSG00000003198	Zfp959	64.3105	64.6411	55.8991	83.7826	81.7442	66.6802	80.19	54.687	68.9918	0.0430239	0.134811	0.319142	0.749619	0.920187
ENSMUSG00000003199	Mpnd	651.144	690.791	626.259	613.409	540.954	592.609	600.341	567.703	610.401	-0.150998	0.0774382	-1.94991	0.0511868	0.289208
ENSMUSG00000003200	Sh3gl1	1154.57	1128.81	1174.83	1153.01	1077.1	1024.62	1138.91	1123.25	1121.89	-0.0748768	0.0657924	-1.13808	0.255088	0.616223
ENSMUSG00000003206	Ebi3	61.2959	52.0988	69.1633	52.8628	50.4891	93.9158	53.0988	53.819	60.8429	0.0560468	0.138048	0.405995	0.684746	0.892672
ENSMUSG00000003208	Ccdc94	59.2862	50.1692	56.8465	47.8758	50.4891	75.1326	52.0151	76.3882	58.5253	0.153516	0.136425	1.12527	0.260474	0.621768
ENSMUSG00000003226	Ranbp2	723.493	536.424	621.522	713.15	651.55	523.111	653.44	776.903	649.949	0.00547699	0.104174	0.0525752	0.95807	0.989244
ENSMUSG00000003228	Grk5	26.1261	27.979	43.5823	35.9068	38.4679	32.8705	30.3422	17.361	31.5795	-0.0778368	0.137745	-0.56508	0.572019	NA
ENSMUSG00000003233	Dvl3	137.665	133.141	109.903	110.713	131.031	161.535	150.627	151.908	135.815	0.21549	0.117121	1.8399	0.0657833	0.328697
ENSMUSG00000003234	Abcf3	542.62	556.685	462.352	481.75	387.083	516.537	534.239	492.183	496.681	-0.0685892	0.097265	-0.705178	0.480699	0.786751
ENSMUSG00000003235	Eif2b5	463.236	542.213	432.034	403.952	395.498	447.978	450.798	496.523	454.029	-0.0325958	0.0970564	-0.335843	0.736989	0.916319
ENSMUSG00000003269	Cyth2	534.581	652.2	537.2	508.68	589.039	552.225	605.76	567.703	568.423	0.0453308	0.0870212	0.520917	0.602425	0.853501
ENSMUSG00000003283	Hck	961.643	967.687	857.435	880.715	771.762	879.052	892.927	940.964	894.023	-0.0655462	0.0785359	-0.834602	0.403942	0.733378
ENSMUSG00000003299	Mrpl4	706.41	731.312	601.626	604.432	793.4	681.829	736.881	661.452	689.668	0.105245	0.0872016	1.20692	0.227464	0.588023
ENSMUSG00000003308	Keap1	425.052	377.234	378.977	352.087	349.817	403.838	370.608	434.892	386.563	0.0241604	0.0933704	0.258759	0.795821	0.939008
ENSMUSG00000003316	Glg1	1667.05	1959.49	1872.15	1730.51	1521.89	1573.09	1486.77	1541.65	1669.07	-0.224198	0.0678783	-3.30293	0.000956789	0.0283593
ENSMUSG00000003344	Btbd2	94.456	139.895	139.274	105.726	112.999	108.942	108.365	131.075	117.592	-0.0388052	0.125336	-0.309609	0.756858	0.921969
ENSMUSG00000003345	Csnk1g2	246.189	464.065	327.815	413.926	454.402	385.055	402.034	538.19	403.959	0.217631	0.121997	1.78391	0.0744378	0.346735
ENSMUSG00000003346	Abhd17a	532.571	655.094	610.153	643.331	687.613	602	624.182	698.778	631.715	0.0872862	0.0853771	1.02236	0.30661	0.667647
ENSMUSG00000003348	Mob3a	366.771	441.875	400.768	358.071	323.371	399.142	339.182	399.302	378.56	-0.0842693	0.0971933	-0.867027	0.385927	0.719386
ENSMUSG00000003360	Ddx23	27.131	31.8381	21.7912	33.912	19.2339	26.2964	22.7566	45.1385	28.5122	0.00112567	0.136471	0.00824845	0.993419	NA
ENSMUSG00000003363	Pld3	4154.05	4412.96	4649.1	4175.17	3774.66	4302.28	3988.91	4255.17	4214.04	-0.0860068	0.0644837	-1.33377	0.182278	0.534428
ENSMUSG00000003380	Rabac1	1516.32	1507.97	1435.37	1300.63	1511.07	1533.64	1467.26	1518.22	1473.81	0.0620304	0.0675277	0.918592	0.358309	0.700097
ENSMUSG00000003382	Etv3	829.002	993.736	1028.92	900.663	871.538	1047.16	960.113	933.151	945.536	0.0210135	0.0827624	0.253901	0.799572	0.941584
ENSMUSG00000003402	Prkcsh	371.795	430.297	405.505	385.001	409.923	381.298	377.11	432.288	399.152	0.00677155	0.0880244	0.0769281	0.938681	0.983983
ENSMUSG00000003418	St8sia6	26.1261	4.82396	15.1591	15.9586	18.0318	11.2699	6.50189	13.0207	13.8615	-0.0800101	0.117114	-0.683183	0.494491	NA
ENSMUSG00000003420	Fcgrt	9127.06	9384.53	10033.4	8993.67	7093.72	8016.65	7790.35	7968.68	8551.01	-0.267559	0.0612717	-4.36677	1.26097e-05	0.00166967
ENSMUSG00000003421	Nosip	368.78	382.058	355.291	327.151	369.051	357.819	327.262	341.143	353.569	-0.0350519	0.0894906	-0.391683	0.695293	0.897716
ENSMUSG00000003423	Pih1d1	304.47	267.247	271.916	239.379	290.913	281.747	286.083	317.705	282.433	0.103392	0.0976412	1.0589	0.289645	0.652154
ENSMUSG00000003429	Rps11	1412.82	1179.94	1309.36	1249.76	1770.72	1330.79	1327.47	1271.69	1356.57	0.126507	0.09209	1.37373	0.169524	0.517247
ENSMUSG00000003435	Supt5	1104.33	1212.74	1006.18	1000.4	968.91	1138.26	1179.01	1153.64	1095.43	0.0355058	0.0823552	0.43113	0.666374	0.886903
ENSMUSG00000003437	Paf1	539.605	654.129	630.996	662.282	601.061	649.897	617.68	668.397	628.006	0.0270219	0.0828716	0.32607	0.744372	0.918504
ENSMUSG00000003438	Timm50	435.101	460.206	423.507	400.96	472.434	439.526	445.38	472.218	443.666	0.0801188	0.0830602	0.964587	0.334752	0.685389
ENSMUSG00000003444	Med29	121.587	148.578	141.169	107.721	174.308	115.516	127.871	165.797	137.818	0.119361	0.125031	0.954649	0.339755	0.688534
ENSMUSG00000003458	Ncstn	3725.99	3811.89	3261.1	3455.04	3163.98	3538.75	3391.82	3503.44	3481.5	-0.0633223	0.0668825	-0.94677	0.343756	0.691071
ENSMUSG00000003464	Pex19	632.051	589.488	623.417	600.442	595.05	618.905	519.068	572.911	593.917	-0.0766516	0.0794734	-0.964494	0.334798	0.685389
ENSMUSG00000003477	Inmt	4.0194	12.5423	9.47442	8.97671	4.80848	12.2091	9.75284	5.20829	8.37394	-0.0238712	0.108318	-0.220381	0.825574	NA
ENSMUSG00000003484	Cyp4f18	355.717	388.811	288.97	340.118	330.583	364.393	286.083	331.594	335.784	-0.0538178	0.101119	-0.532225	0.59457	0.848803
ENSMUSG00000003500	Impdh1	486.348	665.707	574.15	638.344	580.624	657.41	585.17	586.8	596.819	0.0243531	0.0925776	0.263056	0.792507	0.937643
ENSMUSG00000003518	Dusp3	1027.96	939.708	992.919	943.552	1054.26	1101.63	1063.06	1151.03	1034.27	0.153232	0.0682701	2.24449	0.0248009	0.197268
ENSMUSG00000003526	Prodh	28.1358	19.2958	27.4758	20.9457	9.61697	13.1482	23.8403	22.5692	20.6285	-0.160174	0.13264	-1.20759	0.227206	NA
ENSMUSG00000003527	Dgcr14	333.611	288.473	294.654	262.319	262.062	276.112	303.422	300.344	290.125	-0.0379536	0.0981188	-0.386812	0.698895	0.898819
ENSMUSG00000003528	Slc25a1	429.071	496.868	381.819	450.83	384.679	401.96	320.76	376.733	405.34	-0.209704	0.0964271	-2.17474	0.0296494	0.217397
ENSMUSG00000003531	Dgcr6	196.951	217.078	195.173	200.48	205.563	216.006	214.562	168.401	201.777	-0.0101416	0.106568	-0.0951654	0.924183	0.979686
ENSMUSG00000003541	Ier3	4600.21	4125.45	4676.57	5012	4581.28	4809.43	4043.09	4351.52	4524.94	-0.046392	0.0723867	-0.640892	0.521593	0.810279
ENSMUSG00000003545	Fosb	419.023	347.325	503.092	511.672	455.604	485.545	487.642	626.73	479.579	0.169058	0.109267	1.5472	0.121815	0.446954
ENSMUSG00000003546	Klc4	832.017	1115.3	774.06	805.909	857.112	947.61	835.493	864.575	879.01	-0.00770518	0.0958656	-0.0803748	0.935939	0.983684
ENSMUSG00000003549	Ercc1	209.009	209.36	174.329	138.64	204.361	149.326	145.209	166.665	174.612	-0.103291	0.121816	-0.847925	0.39648	0.727364
ENSMUSG00000003559	As3mt	311.504	286.543	313.603	260.325	210.371	260.147	265.494	194.443	262.804	-0.272961	0.107394	-2.54167	0.0110324	0.126865
ENSMUSG00000003573	Homer3	200.97	179.451	158.223	134.651	181.52	183.136	190.722	184.026	176.587	0.106671	0.113644	0.938647	0.347912	0.694337
ENSMUSG00000003575	Crtc1	59.2862	61.7467	61.5837	59.8447	80.5421	77.0109	72.6045	66.8397	67.4323	0.193291	0.130845	1.47725	0.139609	0.478687
ENSMUSG00000003581	Rnf215	256.237	306.804	252.967	241.374	245.233	246.059	260.076	283.852	261.575	-0.0243519	0.101263	-0.240481	0.809957	0.945065
ENSMUSG00000003604	Aven	66.3202	83.9369	90.9544	115.7	96.1697	90.1592	78.0227	106.77	91.0041	0.038798	0.131771	0.294434	0.768426	0.927343
ENSMUSG00000003617	Cp	291.407	295.226	289.917	272.294	233.211	313.679	268.745	299.476	282.994	-0.0322855	0.10002	-0.32279	0.746855	0.919052
ENSMUSG00000003623	Crot	756.653	711.052	766.481	696.194	682.805	656.471	743.383	596.349	701.173	-0.119091	0.0812163	-1.46634	0.142555	0.482556
ENSMUSG00000003644	Rps6ka1	1540.44	1713.47	1395.58	1473.18	1404.08	1654.8	1497.6	1622.38	1537.69	0.0130509	0.0776897	0.167987	0.866593	0.965485
ENSMUSG00000003660	Snrnp200	665.211	714.911	659.42	838.824	847.495	844.303	882.09	969.609	802.733	0.269114	0.0856231	3.14301	0.0016722	0.0400519
ENSMUSG00000003662	Ciao1	261.261	294.262	290.865	295.234	268.073	273.295	250.323	302.949	279.533	-0.0500386	0.0962727	-0.519758	0.603232	0.853741
ENSMUSG00000003665	Has1	53.2571	36.6621	59.6889	134.651	43.2764	57.2886	81.2737	18.229	60.5408	-0.0952365	0.108784	-0.875465	0.381321	0.71604
ENSMUSG00000003680	Taf6l	586.833	569.227	583.624	573.512	609.475	521.233	526.653	537.322	563.485	-0.0711059	0.0791057	-0.898873	0.368721	0.705791
ENSMUSG00000003721	Insig2	402.945	458.276	425.401	465.792	522.923	376.602	411.787	445.308	438.629	0.00066586	0.0967297	0.00688372	0.994508	0.9985
ENSMUSG00000003731	Kpna6	193.936	171.733	147.801	189.508	174.308	190.649	198.308	193.575	182.477	0.088376	0.109328	0.808358	0.418885	0.741718
ENSMUSG00000003746	Man1a	2064.97	2315.5	2258.7	2416.73	1995.52	2308.45	2301.67	2193.56	2231.89	-0.0381961	0.0702851	-0.543445	0.586823	0.845229
ENSMUSG00000003752	Itpkc	131.635	139.895	154.433	188.511	109.393	172.805	184.22	147.568	153.558	0.00161901	0.12573	0.0128769	0.989726	0.996738
ENSMUSG00000003762	Coq8b	193.936	235.409	228.334	193.498	165.893	200.98	197.224	208.331	202.951	-0.111396	0.108001	-1.03144	0.302336	0.663967
ENSMUSG00000003778	Brd8	361.746	353.114	297.497	289.25	340.2	282.687	356.52	293.4	321.802	-0.0296731	0.102137	-0.290523	0.771416	0.929333
ENSMUSG00000003779	Kif20a	88.4269	177.522	114.64	143.627	260.86	200.041	160.38	198.783	168.035	0.426503	0.131372	3.24654	0.00116817	0.0321429
ENSMUSG00000003808	Farsa	306.48	362.762	338.237	266.309	253.648	315.557	288.251	305.553	304.599	-0.107507	0.103263	-1.04109	0.297832	0.661142
ENSMUSG00000003809	Gcdh	111.538	133.141	122.22	126.671	117.808	107.064	99.6957	117.186	116.916	-0.121946	0.118508	-1.02901	0.303476	0.66468
ENSMUSG00000003810	Mast2	245.184	312.593	255.809	455.817	472.434	461.127	561.33	577.252	417.693	0.526272	0.121411	4.33463	1.46005e-05	0.00181354
ENSMUSG00000003812	Dnase2a	504.435	631.939	682.158	537.605	613.082	640.506	615.513	672.737	612.247	0.096214	0.0915127	1.05137	0.293087	0.655514
ENSMUSG00000003813	Rad23a	416.008	392.67	397.926	368.045	399.104	334.34	280.665	315.101	362.983	-0.210651	0.0986882	-2.13451	0.0328007	0.231094
ENSMUSG00000003814	Calr	4825.3	4525.84	4729.63	5171.58	4307.2	4350.18	4376.86	4268.19	4569.35	-0.147084	0.0577422	-2.54726	0.0108573	0.125817
ENSMUSG00000003824	Syce2	66.3202	49.2044	66.3209	66.8266	57.7018	77.0109	62.8516	78.1243	65.5451	0.0996293	0.134029	0.74334	0.457276	0.76946
ENSMUSG00000003847	Nfat5	193.936	179.451	193.278	233.394	228.403	175.623	206.977	163.193	196.782	-0.0418569	0.113989	-0.367201	0.713469	0.905775
ENSMUSG00000003848	Nob1	195.946	192.958	199.91	167.565	158.68	151.204	234.068	207.463	188.474	-0.00669042	0.118388	-0.0565128	0.954933	0.988301
ENSMUSG00000003849	Nqo1	14.0679	13.5071	5.68465	10.9715	12.0212	7.51326	9.75284	12.1527	10.7089	-0.0223667	0.118487	-0.188769	0.850274	NA
ENSMUSG00000003865	Gys1	147.713	148.578	129.8	108.718	137.042	145.569	126.787	127.603	133.976	0.00428789	0.118325	0.0362382	0.971092	0.99262
ENSMUSG00000003868	Ruvbl2	172.834	186.205	184.751	166.568	173.105	206.615	192.889	196.179	184.893	0.0963769	0.105534	0.913233	0.36112	0.702577
ENSMUSG00000003873	Bax	820.963	761.221	747.532	655.3	810.23	690.281	759.638	769.958	751.89	0.0185951	0.0827435	0.224732	0.822188	0.948249
ENSMUSG00000003882	Il7r	34.1649	21.2254	30.3181	21.9431	36.0636	13.1482	9.75284	15.6249	22.7801	-0.175167	0.129884	-1.34865	0.17745	NA
ENSMUSG00000003923	Tfam	154.747	158.226	153.486	139.638	145.457	149.326	122.452	151.908	146.905	-0.0701254	0.112779	-0.621797	0.534075	0.816874
ENSMUSG00000003929	Zfp81	40.194	40.5213	43.5823	32.9146	37.2658	29.1139	50.9315	39.0621	39.1982	-0.00664654	0.138988	-0.0478211	0.961859	NA
ENSMUSG00000003948	Mmd	124.602	147.613	161.065	167.565	173.105	152.144	170.133	199.651	161.985	0.164218	0.115638	1.42011	0.155576	0.500467
ENSMUSG00000003955	Fam162a	195.946	181.381	192.331	171.555	224.797	207.554	193.973	202.255	196.224	0.132443	0.103677	1.27746	0.201441	0.558441
ENSMUSG00000003970	Rpl8	1029.97	1121.09	1045.03	1020.35	1279.06	1222.78	1138.91	1214.4	1133.95	0.190082	0.0680762	2.7922	0.00523517	0.0822317
ENSMUSG00000003992	Ssbp2	209.009	201.642	221.701	191.503	210.371	200.041	205.893	166.665	200.853	-0.0642448	0.106208	-0.604896	0.545248	0.823937
ENSMUSG00000004018	Fancl	116.563	101.303	102.324	112.708	82.9463	88.2808	118.118	79.8604	100.263	-0.1644	0.126397	-1.30066	0.193375	0.547926
ENSMUSG00000004032	Gstm5	71.3444	76.2186	66.3209	80.7904	61.3082	63.8627	78.0227	56.4231	69.2864	-0.122203	0.131953	-0.926107	0.35439	0.697936
ENSMUSG00000004040	Stat3	3416.49	3823.47	3321.73	3565.75	3201.25	3765.08	3633.47	3615.42	3542.83	0.00880068	0.0684186	0.12863	0.89765	0.971337
ENSMUSG00000004043	Stat5a	304.47	345.396	319.288	298.226	345.009	388.811	318.593	375.865	336.957	0.151716	0.093934	1.61514	0.106281	0.416429
ENSMUSG00000004044	Ptrf	526.542	708.157	673.631	593.46	656.358	814.25	646.938	796.868	677.026	0.189966	0.0975082	1.94821	0.0513898	0.290103
ENSMUSG00000004054	Map3k11	1531.39	1714.44	1446.74	1412.34	1614.45	1768.43	1757.68	1951.37	1649.61	0.198579	0.0777109	2.55535	0.0106081	0.124046
ENSMUSG00000004056	Akt2	475.295	488.185	553.306	532.618	513.306	508.084	564.581	583.328	527.338	0.0743024	0.0845381	0.878923	0.379443	0.71475
ENSMUSG00000004069	Dnaja3	423.042	506.516	435.823	415.921	427.955	421.682	412.87	447.913	436.465	-0.0516916	0.0874796	-0.590899	0.554588	0.829059
ENSMUSG00000004070	Hmox2	1152.56	1013.03	1180.51	1027.33	1078.3	994.568	944.942	957.457	1043.59	-0.127389	0.076211	-1.67152	0.0946182	0.393325
ENSMUSG00000004071	Cdip1	435.101	404.248	391.294	405.947	400.306	427.317	432.376	367.184	407.971	-0.00819367	0.0871338	-0.0940354	0.925081	0.979686
ENSMUSG00000004085	Zak	243.174	269.177	318.341	276.283	240.424	264.843	277.414	267.359	269.627	-0.0638267	0.10041	-0.635659	0.524999	0.811217
ENSMUSG00000004096	Cwc15	918.434	770.869	901.965	794.938	925.633	850.877	934.105	875.86	871.585	0.0749289	0.0779937	0.960705	0.336701	0.686718
ENSMUSG00000004098	Col5a3	30.1455	11.5775	37.8977	89.7671	39.67	30.9922	36.8441	22.5692	37.4329	-0.112651	0.126639	-0.88954	0.373713	NA
ENSMUSG00000004099	Dnmt1	328.586	389.776	326.868	362.061	370.253	334.34	367.357	391.489	358.841	0.0494185	0.0923385	0.535189	0.592519	0.848314
ENSMUSG00000004100	Ppan	143.694	120.599	130.747	126.671	121.414	134.3	147.376	141.492	133.287	0.0504286	0.115214	0.437696	0.661607	0.885026
ENSMUSG00000004105	Angptl2	254.227	358.903	258.652	284.262	290.913	315.557	321.844	308.157	299.064	0.0809287	0.104349	0.775559	0.438009	0.755344
ENSMUSG00000004127	Trmt10a	44.2134	48.2396	40.74	31.9172	32.4573	49.7754	48.7642	65.9716	45.2598	0.13836	0.138976	0.995568	0.31946	NA
ENSMUSG00000004151	Etv1	1092.27	970.581	1052.61	958.513	787.389	927.888	900.512	804.68	936.806	-0.229979	0.0781424	-2.94308	0.00324963	0.0633326
ENSMUSG00000004187	Kifc2	48.2329	36.6621	25.5809	38.8991	30.053	23.4789	21.673	50.3468	34.3658	-0.0995061	0.137187	-0.725334	0.468247	NA
ENSMUSG00000004207	Psap	22216.3	18661	20565.2	21273.8	21328	20892.5	22648.3	22584.9	21271.2	0.0759519	0.0634493	1.19705	0.231288	0.59105
ENSMUSG00000004221	Ikbkg	329.591	343.466	342.974	378.019	281.296	329.644	320.76	306.421	329.022	-0.148232	0.091619	-1.61792	0.105681	0.415314
ENSMUSG00000004233	Wars2	45.2183	36.6621	48.3195	47.8758	25.2445	37.5663	39.0114	32.1178	39.002	-0.213349	0.138876	-1.53626	0.124475	NA
ENSMUSG00000004264	Phb2	857.138	918.482	857.435	788.953	937.654	928.827	929.771	935.755	894.252	0.116248	0.0705542	1.64764	0.099426	0.402732
ENSMUSG00000004266	Ptpn6	3369.27	4078.18	3293.31	3143.84	3386.37	3430.74	3437.33	3354.14	3436.65	-0.0267373	0.0752051	-0.355525	0.722196	0.910562
ENSMUSG00000004267	Eno2	42.2037	29.9086	25.5809	29.9224	14.4255	20.6615	11.9201	21.7012	24.5405	-0.345039	0.136186	-2.53359	0.01129	NA
ENSMUSG00000004268	Emg1	360.742	375.304	381.819	313.187	433.966	354.063	423.707	374.997	377.223	0.125914	0.0949627	1.32593	0.184863	0.538034
ENSMUSG00000004270	Lpcat3	923.458	928.13	856.488	875.728	929.24	888.443	982.87	887.145	908.938	0.0375151	0.0704877	0.532223	0.594572	0.848803
ENSMUSG00000004285	Atp6v1f	1407.8	1314.05	1293.26	1265.72	1595.21	1125.11	1344.81	1259.54	1325.69	0.00916955	0.0876235	0.104647	0.916656	0.978259
ENSMUSG00000004317	Clcn5	266.286	235.409	301.287	331.141	269.275	248.877	268.745	277.775	274.849	-0.0757863	0.104011	-0.728634	0.466226	0.776294
ENSMUSG00000004319	Clcn3	526.542	543.178	614.89	488.732	539.752	437.648	535.323	487.843	521.738	-0.107093	0.091454	-1.171	0.241598	0.601923
ENSMUSG00000004356	Utp20	85.4123	98.4088	114.64	105.726	132.233	133.36	134.372	176.214	122.546	0.377867	0.122964	3.07298	0.00211933	0.0468842
ENSMUSG00000004359	Spic	20.097	29.9086	47.3721	35.9068	14.4255	37.5663	31.4258	27.7775	30.56	-0.0987195	0.135733	-0.727308	0.467037	NA
ENSMUSG00000004364	Cul3	279.349	257.6	275.706	370.04	464.019	226.337	325.095	257.81	306.994	0.0705441	0.128443	0.549225	0.582851	0.844671
ENSMUSG00000004383	Large	34.1649	27.0142	26.5284	33.912	27.6488	42.2621	24.9239	26.0414	30.312	-0.00116558	0.138525	-0.00841425	0.993286	NA
ENSMUSG00000004393	Ddx56	366.771	423.544	415.927	333.136	335.392	395.385	396.615	373.26	380.004	-0.0309694	0.0955124	-0.324245	0.745753	0.918643
ENSMUSG00000004394	Tmed4	843.07	756.397	740.9	752.049	774.166	883.748	831.159	739.577	790.133	0.0568622	0.0792293	0.717691	0.472948	0.779503
ENSMUSG00000004446	Bid	598.891	569.227	530.568	446.841	527.731	486.484	434.543	520.829	514.389	-0.106806	0.0946854	-1.12801	0.259315	0.62078
ENSMUSG00000004451	Ralb	1461.05	1582.26	1611.6	1431.29	1354.79	1518.62	1500.85	1605.89	1508.29	-0.0225829	0.0717062	-0.314937	0.75281	0.921316
ENSMUSG00000004455	Ppp1cc	1788.63	1900.64	2000.05	1829.25	1744.28	1787.22	1901.8	1691.82	1830.46	-0.0734836	0.0653444	-1.12456	0.260776	0.621995
ENSMUSG00000004460	Dnajb11	1510.29	1454.91	1406.95	1311.6	1328.34	1348.63	1335.06	1442.7	1392.31	-0.0548863	0.0677172	-0.810522	0.41764	0.740434
ENSMUSG00000004462	Tbccd1	223.077	235.409	244.44	226.413	212.775	154.961	223.232	211.804	216.514	-0.173402	0.109255	-1.58714	0.112481	0.430969
ENSMUSG00000004473	Clec11a	2.0097	5.78875	11.3693	18.9508	21.6382	14.0874	11.9201	10.4166	12.0226	0.117891	0.111216	1.06002	0.289134	NA
ENSMUSG00000004500	Zfp324	37.1795	42.4509	34.1079	40.8939	27.6488	25.3573	31.4258	27.7775	33.3552	-0.234768	0.139065	-1.68819	0.0913748	NA
ENSMUSG00000004508	Gab2	618.988	514.234	525.83	681.233	483.253	517.476	516.901	542.53	550.056	-0.159151	0.0923669	-1.72303	0.0848833	0.36984
ENSMUSG00000004530	Coro1c	5692.48	6341.58	5582.33	5258.36	4968.37	6100.77	5304.46	6105.85	5669.27	-0.0226492	0.0776358	-0.291737	0.770488	0.928587
ENSMUSG00000004535	Tax1bp1	2412.65	2343.48	2472.82	2207.27	2403.04	2045.49	2334.18	2143.21	2295.27	-0.0758599	0.0688441	-1.10191	0.270501	0.633609
ENSMUSG00000004552	Ctse	10.0485	19.2958	3.78977	8.97671	12.0212	2.81747	8.66919	7.81243	9.17889	-0.077091	0.105607	-0.729982	0.465401	NA
ENSMUSG00000004558	Ndrg2	5.02426	12.5423	16.1065	13.9638	14.4255	16.9048	7.58554	9.54852	12.0127	0.00490407	0.118647	0.0413334	0.96703	NA
ENSMUSG00000004561	Mettl17	88.4269	94.5496	71.0582	67.824	81.7442	88.2808	76.9391	82.4645	81.4109	0.0240151	0.129346	0.185666	0.852707	0.961524
ENSMUSG00000004562	Arhgef40	151.733	137.965	121.273	136.645	163.488	163.413	138.707	192.707	150.741	0.20897	0.116454	1.79444	0.0727426	0.34268
ENSMUSG00000004565	Pnpla6	141.684	176.557	124.115	179.534	192.339	181.257	143.042	179.686	164.777	0.123622	0.119594	1.03368	0.301288	0.663409
ENSMUSG00000004567	Mcoln1	1197.78	1342.03	1119.88	1159.99	1062.67	1136.38	1043.55	1098.08	1145.05	-0.139121	0.0732023	-1.90051	0.0573666	0.307824
ENSMUSG00000004568	Arhgef18	143.694	140.86	112.746	121.684	93.7654	135.239	126.787	120.659	124.429	-0.0870314	0.122116	-0.712694	0.476035	0.782014
ENSMUSG00000004591	Pkn2	419.023	446.699	405.505	432.877	383.477	417.925	455.133	400.17	420.101	-0.0361126	0.085886	-0.420472	0.674141	0.888981
ENSMUSG00000004609	Cd33	6385.83	5972.06	5985.94	6366.48	5529.76	5769.25	5809.44	5653.59	5934.04	-0.113814	0.0533655	-2.13273	0.0329473	0.231763
ENSMUSG00000004610	Etfb	124.602	116.74	141.169	131.658	164.691	123.969	154.962	110.242	133.504	0.0730534	0.122149	0.598065	0.549796	0.826191
ENSMUSG00000004626	Stxbp2	748.614	806.566	798.694	803.914	625.103	711.882	671.862	671.869	729.813	-0.217186	0.0735404	-2.95329	0.00314403	0.061675
ENSMUSG00000004631	Sgce	217.048	215.149	186.646	188.511	250.041	169.048	166.882	184.894	197.277	-0.0557701	0.11574	-0.481856	0.629908	0.868294
ENSMUSG00000004633	Chn2	305.475	309.698	304.129	264.314	324.573	257.329	322.927	293.4	297.731	0.0121452	0.0988023	0.122924	0.902167	0.972782
ENSMUSG00000004637	Wwox	142.689	164.015	135.484	127.669	174.308	159.657	134.372	148.436	148.329	0.0870119	0.11568	0.752178	0.451944	0.766286
ENSMUSG00000004642	Slbp	759.667	784.376	976.813	801.919	966.505	900.652	918.934	829.854	867.34	0.107721	0.0853692	1.26183	0.207011	0.564717
ENSMUSG00000004655	Aqp1	3112.02	3567.8	4351.6	4104.35	4660.62	4144.5	5051.97	4496.49	4186.17	0.246196	0.0883872	2.78543	0.00534576	0.0831526
ENSMUSG00000004661	Arid3b	41.1989	50.1692	50.2144	45.881	49.287	53.532	65.0189	49.4787	50.5975	0.125439	0.136495	0.919	0.358095	NA
ENSMUSG00000004665	Cnn2	993.798	1009.17	1084.82	915.624	901.591	847.12	801.9	875.86	928.736	-0.207373	0.0746404	-2.7783	0.00546448	0.0836771
ENSMUSG00000004667	Polr2e	1287.21	1180.91	1183.36	1097.15	1337.96	1118.54	1180.09	1185.75	1196.37	0.0193524	0.0754462	0.256506	0.79756	0.940533
ENSMUSG00000004677	Myo9b	719.473	676.319	607.31	838.824	769.357	824.581	883.174	1104.16	802.899	0.281359	0.102326	2.74964	0.00596602	0.087984
ENSMUSG00000004698	Hdac9	611.954	502.657	453.825	416.918	468.827	500.571	449.714	468.746	484.152	-0.0610944	0.099296	-0.615275	0.538373	0.819345
ENSMUSG00000004707	Ly9	266.286	279.79	267.179	262.319	251.243	172.805	238.403	230.901	246.116	-0.223155	0.106519	-2.09498	0.0361728	0.244398
ENSMUSG00000004709	Cd244	28.1358	13.5071	16.1065	47.8758	21.6382	30.0531	19.5057	14.7568	23.9474	-0.090806	0.128429	-0.707052	0.479534	NA
ENSMUSG00000004730	Adgre1	9132.09	10082.1	9673.38	9288.9	8185.24	8366.02	8113.28	7392.29	8779.16	-0.239883	0.060016	-3.99699	6.41537e-05	0.00444339
ENSMUSG00000004748	Mtfp1	16.0776	9.64792	23.6861	21.9431	19.2339	15.0265	6.50189	11.2846	15.4252	-0.127049	0.12433	-1.02186	0.306845	NA
ENSMUSG00000004768	Rab23	48.2329	64.6411	54.9516	27.9275	56.4997	57.2886	45.5133	51.2148	50.7837	0.0545832	0.138822	0.393189	0.69418	NA
ENSMUSG00000004771	Rab11a	4911.71	4099.4	4869.85	4647.94	5021.26	4061.86	4525.32	4026.01	4520.42	-0.0655361	0.0789563	-0.83003	0.406522	0.733941
ENSMUSG00000004788	Eif2b2	253.222	235.409	228.334	237.384	248.839	226.337	223.232	229.165	235.24	-0.0363294	0.0975313	-0.37249	0.709528	0.904475
ENSMUSG00000004789	Dlst	958.628	1039.08	963.549	1027.33	991.75	1054.67	1001.29	1054.68	1011.37	0.0389571	0.0675816	0.576445	0.564314	0.832828
ENSMUSG00000004798	Ulk2	770.721	871.207	807.221	886.699	865.527	832.094	809.486	860.235	837.899	0.0125102	0.0732138	0.170872	0.864324	0.965346
ENSMUSG00000004814	Ccl24	738.566	779.552	953.127	758.033	896.782	926.949	1033.8	816.833	862.955	0.162987	0.0902431	1.80609	0.0709038	0.338747
ENSMUSG00000004815	Dgkq	109.529	70.4298	64.4261	67.824	58.9039	99.5507	105.114	129.339	88.1395	0.194878	0.137631	1.41594	0.156793	0.501336
ENSMUSG00000004837	Grap	337.63	332.853	305.076	312.19	235.616	259.208	328.346	278.643	298.695	-0.189058	0.1008	-1.87558	0.0607127	0.316872
ENSMUSG00000004843	Chmp2b	1019.92	1076.71	1081.98	1059.25	955.686	1046.22	1094.49	966.137	1037.55	-0.0568829	0.0701564	-0.810801	0.41748	0.740396
ENSMUSG00000004846	Plod3	846.085	999.525	869.752	813.888	698.432	924.131	847.413	868.916	858.518	-0.0692007	0.0889849	-0.777668	0.436765	0.754679
ENSMUSG00000004849	Ap1s1	681.289	738.066	622.469	619.393	706.847	714.699	665.36	632.807	672.616	0.0276254	0.0815287	0.338842	0.734729	0.915251
ENSMUSG00000004865	Srpk1	212.024	206.466	178.119	178.537	180.318	144.63	186.388	178.818	183.162	-0.136145	0.110617	-1.23078	0.218403	0.579182
ENSMUSG00000004880	Lbr	469.265	583.699	660.367	684.225	522.923	632.992	594.923	646.696	599.386	0.00125928	0.10057	0.0125213	0.99001	0.996738
ENSMUSG00000004891	Nes	51.2474	109.022	73.9005	31.9172	74.5315	52.5928	58.517	59.8953	63.9529	-0.0565543	0.13877	-0.407541	0.683611	0.892395
ENSMUSG00000004895	Prcc	37.1795	29.9086	30.3181	42.8887	45.6806	41.3229	34.6768	50.3468	39.0402	0.156368	0.138931	1.12551	0.260375	NA
ENSMUSG00000004896	Rrnad1	63.3056	99.3736	59.6889	67.824	64.9145	62.9236	84.5246	60.7633	70.4148	-0.055572	0.135698	-0.409527	0.682153	0.891921
ENSMUSG00000004897	Hdgf	609.945	1036.19	864.067	1005.39	1197.31	892.2	1069.56	1078.12	969.097	0.215307	0.110882	1.94177	0.0521653	0.291095
ENSMUSG00000004929	Thop1	154.747	171.733	166.75	131.658	132.233	191.588	158.213	164.061	158.873	0.0402369	0.117579	0.342212	0.732191	0.913951
ENSMUSG00000004931	Apba3	270.305	296.191	338.237	311.193	278.892	291.139	287.167	324.65	299.722	-0.0334958	0.0969099	-0.345639	0.729614	0.913057
ENSMUSG00000004933	Matk	198.961	197.782	189.488	201.477	171.903	180.318	157.129	145.832	180.361	-0.219373	0.10682	-2.05367	0.0400073	0.256388
ENSMUSG00000004934	Pias4	269.3	282.684	255.809	264.314	228.403	237.607	254.657	256.074	256.106	-0.114475	0.095621	-1.19717	0.23124	0.59105
ENSMUSG00000004936	Map2k1	1017.91	1232.04	1032.71	1037.31	878.75	1018.99	928.687	1079.85	1028.28	-0.129105	0.0836921	-1.54261	0.122924	0.448317
ENSMUSG00000004937	Sgta	714.449	823.933	702.055	666.271	740.507	780.44	627.433	704.855	719.993	-0.0236802	0.0866058	-0.273425	0.784527	0.934809
ENSMUSG00000004945	Tmem242	112.543	113.845	118.43	123.679	188.733	161.535	124.62	152.776	137.02	0.317305	0.119358	2.65843	0.00785058	0.103192
ENSMUSG00000004947	Dtx2	100.485	97.444	94.7442	89.7671	108.191	133.36	101.863	109.374	104.404	0.181686	0.122442	1.48386	0.137847	0.476641
ENSMUSG00000004951	Hspb1	24.1164	33.7677	30.3181	32.9146	25.2445	25.3573	26.0076	16.4929	26.7774	-0.170012	0.137999	-1.23198	0.217956	NA
ENSMUSG00000004952	Rasa4	980.735	1109.51	918.071	832.839	1000.16	942.914	845.246	994.783	953.033	-0.0194853	0.0872011	-0.223453	0.823183	0.948523
ENSMUSG00000004980	Hnrnpa2b1	4928.79	5047.79	5177.77	4835.45	5461.24	4845.12	5521.19	4948.74	5095.76	0.0523095	0.0618895	0.845208	0.397995	0.728214
ENSMUSG00000004994	Ccdc130	127.616	101.303	90.007	106.723	106.989	93.9158	121.369	107.638	106.945	0.00983264	0.124512	0.0789693	0.937057	0.983684
ENSMUSG00000004996	Mri1	173.839	144.719	134.537	134.651	137.042	115.516	175.551	116.318	141.522	-0.0837697	0.123746	-0.676947	0.49844	0.796304
ENSMUSG00000005034	Prkacb	2244.84	2213.23	2284.28	2304.02	1835.64	1847.32	1776.1	1874.98	2047.55	-0.289396	0.0563919	-5.13188	2.86869e-07	9.80793e-05
ENSMUSG00000005043	Sgsh	321.552	271.107	246.335	318.175	281.296	330.584	298.003	322.914	298.746	0.0799234	0.101318	0.788834	0.430209	0.75112
ENSMUSG00000005054	Cstb	3581.29	3079.62	3490.38	3167.78	4521.18	3436.38	3610.72	3664.9	3569.03	0.174599	0.0820442	2.12811	0.0333284	0.232987
ENSMUSG00000005057	Sh2b2	402.945	450.558	396.978	460.804	358.232	504.328	460.551	500.864	441.908	0.0812768	0.0996685	0.815472	0.414802	0.739206
ENSMUSG00000005069	Pex5	761.677	811.39	791.114	783.966	662.369	767.292	687.033	778.639	755.435	-0.10856	0.0765278	-1.41857	0.156026	0.500883
ENSMUSG00000005078	Jkamp	369.785	348.29	358.133	371.037	387.083	373.785	404.201	331.594	367.989	0.0404121	0.0894873	0.451597	0.65156	0.879293
ENSMUSG00000005087	Cd44	2981.39	3187.67	3790.72	3349.31	3957.38	3333.07	3566.29	3111.08	3409.61	0.0622835	0.0825447	0.754543	0.450523	0.765539
ENSMUSG00000005102	Eif2ak4	138.669	146.648	121.273	135.648	121.414	141.813	123.536	182.29	138.911	0.0573677	0.121957	0.470392	0.638075	0.872099
ENSMUSG00000005103	Wdr1	8023.74	8034.79	8090.21	7684.06	7762.1	7823.18	7702.58	7814.17	7866.85	-0.0324394	0.0483617	-0.670767	0.502369	0.797604
ENSMUSG00000005107	Slc2a9	47.228	56.9227	65.3735	33.912	46.8827	26.2964	58.517	44.2704	47.4254	-0.105881	0.139032	-0.76156	0.446323	NA
ENSMUSG00000005125	Ndrg1	263.271	247.952	214.122	295.234	233.211	220.702	213.479	209.199	237.146	-0.182194	0.105093	-1.73364	0.0829818	0.366351
ENSMUSG00000005131	4930550C14Rik	7.03396	0.964792	11.3693	8.97671	4.80848	5.63495	8.66919	7.81243	6.90873	-0.0103435	0.0992357	-0.104231	0.916986	NA
ENSMUSG00000005142	Man2b1	13260	16841.4	12209.7	12654.2	12734.1	15151.4	14862.2	15696.9	14176.2	0.0785541	0.0883268	0.889358	0.373811	0.709783
ENSMUSG00000005150	Wdr83	148.718	134.106	160.118	145.622	138.244	152.144	145.209	151.908	147.009	-0.000232552	0.111419	-0.00208718	0.998335	0.999187
ENSMUSG00000005161	Prdx2	1634.89	1589.01	1596.44	1516.07	1644.5	1549.61	1508.44	1419.26	1557.28	-0.0477741	0.0661496	-0.722213	0.470164	0.777074
ENSMUSG00000005198	Polr2a	291.407	263.388	258.652	330.143	289.711	399.142	283.916	360.24	309.575	0.182651	0.10913	1.6737	0.0941897	0.392813
ENSMUSG00000005204	Senp3	238.15	189.099	179.067	211.451	180.318	189.71	211.312	184.894	198	-0.0755376	0.108932	-0.693437	0.488035	0.790918
ENSMUSG00000005225	Plekha8	95.4609	107.092	115.588	125.674	128.627	123.969	126.787	107.638	116.354	0.0976877	0.120389	0.811435	0.417116	0.740314
ENSMUSG00000005233	Spc25	75.3638	131.212	116.535	125.674	234.414	140.874	170.133	161.457	144.458	0.435602	0.130625	3.33475	0.000853759	0.0265995
ENSMUSG00000005262	Ufd1l	538.6	535.46	497.407	474.768	520.518	592.609	521.235	558.155	529.844	0.0915708	0.0823359	1.11216	0.266069	0.626814
ENSMUSG00000005267	Zfp287	21.1019	18.3311	17.054	21.9431	24.0424	18.7832	14.0874	12.1527	18.437	-0.0685133	0.132676	-0.516397	0.605577	NA
ENSMUSG00000005299	Letm1	661.192	842.264	617.732	642.333	633.518	713.76	696.786	739.577	693.395	0.010216	0.0923817	0.110584	0.911946	0.976302
ENSMUSG00000005312	Ubqln1	1478.14	1623.75	1586.97	1490.13	1494.24	1444.42	1506.27	1660.58	1535.56	-0.0156971	0.0681824	-0.230222	0.817919	0.947767
ENSMUSG00000005354	Txn2	729.522	670.531	698.265	664.277	793.4	685.585	675.113	632.807	693.687	0.00920547	0.0817183	0.112649	0.910309	0.975881
ENSMUSG00000005362	Crbn	420.028	347.325	364.765	341.115	358.232	370.028	358.688	315.101	359.41	-0.0630825	0.0940686	-0.670601	0.502475	0.797604
ENSMUSG00000005370	Msh6	196.951	236.374	219.807	230.402	194.744	200.041	257.908	172.741	213.621	-0.0805692	0.112414	-0.716717	0.473549	0.780065
ENSMUSG00000005371	Fbxo11	290.402	180.416	223.596	279.275	167.095	181.257	192.889	191.839	213.346	-0.311753	0.117731	-2.648	0.00809686	0.105353
ENSMUSG00000005374	Tbl2	176.854	226.726	200.858	209.457	194.744	233.85	234.068	263.018	217.447	0.154264	0.108522	1.42149	0.155174	0.500449
ENSMUSG00000005378	Wbscr22	245.184	309.698	245.387	222.423	239.222	223.52	300.171	233.505	252.389	-0.0319183	0.111	-0.287552	0.77369	0.930081
ENSMUSG00000005397	Nid1	46.2232	63.6763	55.8991	139.638	68.5209	73.2543	60.6843	52.0829	69.9973	-0.123418	0.138799	-0.889189	0.373902	0.709783
ENSMUSG00000005410	Mcm5	184.893	259.529	227.386	232.397	257.254	374.724	271.996	248.262	257.055	0.270462	0.11685	2.31461	0.0206345	0.180207
ENSMUSG00000005413	Hmox1	3991.27	4583.73	6114.79	6259.76	4605.33	4425.31	4439.71	4197.01	4827.11	-0.208524	0.0999145	-2.08702	0.0368863	0.246749
ENSMUSG00000005417	Mprip	222.072	336.712	286.128	658.292	628.709	324.949	543.992	619.786	452.58	0.160678	0.1304	1.23219	0.217878	0.579036
ENSMUSG00000005442	Cic	136.66	113.845	149.696	185.519	163.488	186.892	159.296	209.199	163.075	0.221984	0.122064	1.81858	0.068975	0.335885
ENSMUSG00000005447	Pafah1b3	54.262	45.3452	72.0056	59.8447	50.4891	42.2621	55.2661	35.59	51.8831	-0.193935	0.13792	-1.40614	0.159682	NA
ENSMUSG00000005465	Il27ra	15.0728	17.3663	5.68465	9.97412	12.0212	13.1482	27.0912	5.20829	13.1958	0.052273	0.114031	0.45841	0.646658	NA
ENSMUSG00000005469	Prkaca	324.567	344.431	406.453	476.763	396.7	459.248	438.878	456.593	412.954	0.14689	0.10305	1.42543	0.154034	0.499228
ENSMUSG00000005470	Asf1b	139.674	196.818	188.541	185.519	235.616	255.451	190.722	199.651	198.999	0.241288	0.115392	2.09102	0.0365262	0.245161
ENSMUSG00000005481	Ddx39	664.207	640.622	575.097	614.406	621.497	605.757	652.357	661.452	629.424	0.0251225	0.0776285	0.323625	0.746222	0.918646
ENSMUSG00000005483	Dnajb1	630.042	647.376	594.046	642.333	674.39	653.654	735.798	637.147	651.848	0.0938444	0.0770891	1.21735	0.223472	0.585929
ENSMUSG00000005501	Usp40	149.723	150.508	120.325	183.524	108.191	122.091	111.616	135.415	135.174	-0.247386	0.121895	-2.0295	0.0424077	0.263856
ENSMUSG00000005505	Kbtbd4	43.2086	49.2044	55.8991	44.8836	56.4997	34.7488	40.095	47.7426	46.5352	-0.0652103	0.138122	-0.472122	0.63684	NA
ENSMUSG00000005506	Celf1	1162.61	1198.27	1113.24	1113.11	989.346	1034.95	1037.05	1106.76	1094.42	-0.128353	0.0675493	-1.90014	0.0574145	0.307898
ENSMUSG00000005510	Ndufs3	598.891	591.418	555.201	563.538	645.539	634.871	627.433	588.536	600.678	0.102456	0.075687	1.35367	0.17584	0.526278
ENSMUSG00000005514	Por	654.158	713.946	696.37	705.17	507.295	636.749	525.57	610.238	631.187	-0.248763	0.0849565	-2.92813	0.00341012	0.0650523
ENSMUSG00000005533	Igf1r	38.1843	44.3804	57.794	66.8266	50.4891	48.8362	40.095	55.5551	50.2701	-0.047032	0.138221	-0.340267	0.733656	NA
ENSMUSG00000005534	Insr	95.4609	91.6553	101.376	127.669	102.18	120.212	91.0265	108.506	104.761	0.0170436	0.12554	0.135763	0.892009	0.970529
ENSMUSG00000005566	Trim28	337.63	367.586	380.872	363.058	353.424	406.655	442.129	440.968	386.54	0.160709	0.0917592	1.75142	0.0798731	0.358692
ENSMUSG00000005575	Ube2m	237.145	313.557	314.551	506.685	564.997	362.515	464.885	513.016	409.669	0.247184	0.138935	1.77913	0.0752183	0.348567
ENSMUSG00000005580	Adcy9	62.3008	39.5565	56.8465	61.8396	51.6912	51.6537	65.0189	44.2704	54.1472	-0.0326034	0.13735	-0.237374	0.812366	0.945887
ENSMUSG00000005583	Mef2c	3706.9	3597.71	3824.82	3191.72	3178.41	3196.89	3265.03	3304.66	3408.27	-0.137224	0.0651367	-2.1067	0.0351434	0.241909
ENSMUSG00000005609	Ctr9	383.853	420.649	375.187	350.092	417.136	303.348	408.536	448.781	388.448	0.0365232	0.103715	0.35215	0.724726	0.911182
ENSMUSG00000005610	Eif4g2	8282.99	8145.74	8521.29	9040.54	8352.34	9101.38	9860.12	9839.32	8892.97	0.120832	0.0660347	1.82982	0.0672761	0.333198
ENSMUSG00000005611	Mrvi1	190.922	195.853	140.221	177.539	201.956	246.999	255.741	230.901	205.016	0.328318	0.111763	2.93762	0.00330741	0.064009
ENSMUSG00000005615	Pcyt1a	2571.41	3109.53	2959.81	2978.27	2702.37	2908.57	2594.26	2723.93	2818.52	-0.0822489	0.0695762	-1.18214	0.23715	0.596534
ENSMUSG00000005621	Zfp592	376.819	323.205	305.076	386.996	342.604	351.245	365.19	435.76	360.862	0.0896182	0.100602	0.890815	0.373028	0.709495
ENSMUSG00000005625	Psmd4	952.599	1010.14	1063.03	980.456	1127.59	1145.77	974.2	1002.6	1032.05	0.077882	0.0754245	1.03258	0.301799	0.663765
ENSMUSG00000005656	Snx6	2280.01	2248.93	2408.4	2028.74	2140.98	2206.08	2160.8	2287.31	2220.15	-0.0258244	0.0659839	-0.391374	0.695521	0.897716
ENSMUSG00000005667	Mthfd2	67.325	107.092	123.167	111.71	114.201	112.699	96.4447	110.242	105.36	0.0558038	0.12979	0.429956	0.667228	0.886903
ENSMUSG00000005674	Tomm40l	57.2765	56.9227	56.8465	53.8603	36.0636	58.2278	26.0076	44.2704	48.6844	-0.236039	0.138679	-1.70206	0.0887449	NA
ENSMUSG00000005682	Pan2	160.776	153.402	157.275	166.568	159.882	208.493	209.144	199.651	176.899	0.233324	0.109566	2.12952	0.033211	0.232425
ENSMUSG00000005683	Cs	1591.68	1504.11	1391.79	1500.11	1368.01	1381.5	1411.99	1379.33	1441.07	-0.105339	0.0643847	-1.63608	0.101823	0.407291
ENSMUSG00000005686	Ampd3	475.295	465.03	396.978	484.742	526.529	370.028	478.973	467.878	458.182	0.012503	0.0994667	0.1257	0.899969	0.972066
ENSMUSG00000005687	Bcas2	781.774	807.531	833.749	799.925	944.867	872.478	809.486	869.784	839.949	0.108153	0.0723333	1.4952	0.134863	0.470314
ENSMUSG00000005698	Ctcf	491.372	472.748	436.771	446.841	503.689	507.145	482.224	518.224	482.377	0.11196	0.0805442	1.39005	0.164514	0.510722
ENSMUSG00000005699	Pard6a	46.2232	58.8523	58.7414	27.9275	51.6912	65.741	44.4296	55.5551	51.1452	0.0966065	0.138876	0.695631	0.48666	NA
ENSMUSG00000005732	Ranbp1	1298.27	1127.84	1161.56	983.448	1406.48	1288.52	1348.06	1398.42	1251.58	0.228459	0.079927	2.85834	0.00425859	0.074474
ENSMUSG00000005774	Rfx5	78.3784	117.705	72.0056	91.7619	121.414	69.4977	106.198	99.8255	94.5982	0.0857505	0.134121	0.639352	0.522594	0.810279
ENSMUSG00000005779	Psmb4	806.895	863.489	765.533	728.111	1097.54	926.01	756.387	867.18	851.393	0.177029	0.0939594	1.8841	0.0595511	0.314486
ENSMUSG00000005802	Slc30a4	106.514	127.353	111.798	146.62	85.3506	112.699	153.878	105.902	118.764	-0.0707186	0.129471	-0.546211	0.584921	0.844767
ENSMUSG00000005803	Sqrdl	532.571	522.917	559.938	554.561	516.912	460.187	384.695	418.399	493.773	-0.253345	0.0902317	-2.80772	0.00498938	0.0802221
ENSMUSG00000005804	Bloc1s6	238.15	246.987	266.231	262.319	258.456	246.999	217.813	210.936	243.486	-0.102139	0.100521	-1.0161	0.309584	0.669509
ENSMUSG00000005813	Metap1	180.873	234.445	260.547	261.322	245.233	202.858	234.068	235.241	231.823	-0.0264765	0.110817	-0.238921	0.811167	0.945292
ENSMUSG00000005823	Gpr108	512.474	591.418	540.989	498.706	595.05	536.259	470.304	460.065	525.658	-0.051367	0.092244	-0.556861	0.577623	0.841669
ENSMUSG00000005824	Tnfsf14	2.0097	5.78875	13.2642	8.97671	3.60636	12.2091	4.3346	2.60414	6.59919	-0.0513941	0.0937752	-0.548057	0.583653	NA
ENSMUSG00000005846	Rsl1d1	673.25	803.672	793.009	662.282	693.624	735.361	844.162	789.923	749.41	0.0562521	0.0869242	0.64714	0.517541	0.808316
ENSMUSG00000005871	Apc	428.067	428.368	511.619	542.592	491.667	407.595	385.779	439.232	454.365	-0.127987	0.0975119	-1.31253	0.189342	0.543461
ENSMUSG00000005873	Reep5	1412.82	1371.93	1360.53	1452.23	1785.15	1671.7	1705.66	1552.07	1539.01	0.245997	0.0656703	3.74594	0.000179717	0.00929986
ENSMUSG00000005881	Ergic3	1111.37	1097.93	1168.2	1051.27	1149.23	1184.28	1162.76	1152.77	1134.72	0.0659534	0.0649183	1.01594	0.309656	0.669509
ENSMUSG00000005882	Uqcc1	189.917	207.43	174.329	182.526	194.744	167.17	175.551	176.214	183.485	-0.0676775	0.106348	-0.636375	0.524532	0.810935
ENSMUSG00000005886	Ncoa2	319.543	267.247	283.285	312.19	282.498	348.428	306.673	287.324	300.898	0.0452826	0.09843	0.460049	0.645481	0.876873
ENSMUSG00000005893	Nr2c2	185.897	210.325	232.123	275.286	207.967	191.588	173.384	219.616	212.023	-0.148291	0.113575	-1.30566	0.191667	0.546131
ENSMUSG00000005897	Nr2c1	223.077	168.839	172.434	207.462	141.85	160.596	183.137	157.117	176.814	-0.206139	0.114046	-1.80751	0.0706827	0.338747
ENSMUSG00000005899	Smpd4	209.009	256.635	243.493	202.475	235.616	245.12	242.737	243.053	234.767	0.0706556	0.102037	0.692453	0.488653	0.791476
ENSMUSG00000005907	Pex1	116.563	112.881	140.221	112.708	86.5527	126.786	105.114	112.846	114.209	-0.113357	0.123614	-0.917019	0.359133	0.700831
ENSMUSG00000005936	Kctd20	837.041	1086.36	899.123	968.487	905.197	1080.97	1074.98	940.964	974.14	0.0697669	0.0872017	0.800064	0.423674	0.745496
ENSMUSG00000005949	Ctns	721.483	767.01	734.268	738.085	657.56	655.532	593.84	658.848	690.828	-0.190597	0.0733903	-2.59703	0.00940344	0.115195
ENSMUSG00000005951	Shpk	47.228	53.0636	59.6889	50.868	36.0636	69.4977	67.1862	54.687	54.7854	0.0657293	0.137762	0.477122	0.633275	0.871284
ENSMUSG00000005968	Tuft1	133.645	198.747	183.804	167.565	153.871	176.562	148.46	179.686	167.793	-0.0396385	0.117072	-0.338581	0.734925	0.915251
ENSMUSG00000005973	Rcn1	18.0873	15.4367	13.2642	30.9198	12.0212	22.5398	21.673	21.7012	19.4554	0.00592221	0.130905	0.0452407	0.963915	NA
ENSMUSG00000005981	Trap1	616.979	614.573	555.201	555.559	484.455	483.666	504.98	518.224	541.705	-0.212403	0.0794659	-2.67288	0.00752021	0.100882
ENSMUSG00000005982	Naa60	1253.05	1458.77	1338.74	1297.63	1256.22	1313.88	1310.13	1325.51	1319.24	-0.0361677	0.0678413	-0.533122	0.593949	0.848671
ENSMUSG00000005983	1700037C18Rik	11.0534	20.2606	14.2116	12.9664	20.4361	18.7832	14.0874	20.8331	16.579	0.113023	0.130835	0.863861	0.387664	NA
ENSMUSG00000005986	Ankrd13d	28.1358	28.9438	54.0042	33.912	43.2764	27.2356	48.7642	41.6663	38.2423	0.0663657	0.138704	0.478469	0.632316	NA
ENSMUSG00000006005	Tpr	1828.83	1796.44	2009.52	1606.83	1773.13	1893.34	1733.84	1957.45	1824.92	0.0216364	0.0748259	0.289157	0.772461	0.929738
ENSMUSG00000006010	BC003331	620.998	583.699	623.417	587.476	650.347	694.977	605.76	610.238	622.114	0.0772831	0.0777777	0.99364	0.320398	0.675256
ENSMUSG00000006014	Prg4	586.833	518.093	910.492	1037.31	225.999	146.509	405.285	184.894	501.927	-0.532913	0.130901	-4.07111	4.67898e-05	0.00390088
ENSMUSG00000006019	Dhx34	266.286	314.522	260.547	261.322	245.233	313.679	266.578	273.435	275.2	-0.00183435	0.101457	-0.01808	0.985575	0.996196
ENSMUSG00000006021	Kptn	41.1989	57.8875	63.4786	62.837	46.8827	47.8971	44.4296	50.3468	51.8698	-0.146556	0.136837	-1.07103	0.284158	NA
ENSMUSG00000006024	Napa	2068.99	1992.3	2112.8	1947.95	1845.26	1864.23	1909.39	1864.57	1950.68	-0.112717	0.0584303	-1.92908	0.0537211	0.296388
ENSMUSG00000006050	Sra1	513.479	515.199	576.045	497.709	563.795	534.381	529.904	479.162	526.209	0.000739835	0.0835906	0.0088507	0.992938	0.997775
ENSMUSG00000006057	Atp5g1	692.342	637.728	716.266	589.471	872.74	795.467	800.817	696.174	725.126	0.233919	0.0859492	2.7216	0.00649672	0.0925576
ENSMUSG00000006058	Snf8	280.353	280.755	236.861	325.156	391.891	353.123	332.68	305.553	313.297	0.249114	0.103313	2.41126	0.0158974	0.155757
ENSMUSG00000006095	Tbcb	938.531	888.574	857.435	824.86	1027.81	911.922	942.775	923.603	914.439	0.10719	0.0729686	1.46899	0.141834	0.4814
ENSMUSG00000006127	Inpp5k	1405.79	1446.22	1487.48	1396.38	1369.22	1319.52	1209.35	1226.55	1357.56	-0.153448	0.0665832	-2.3046	0.0211888	0.183094
ENSMUSG00000006134	Crkl	426.057	462.135	495.512	501.698	483.253	488.362	462.718	440.968	470.088	-0.00800806	0.0845668	-0.0946951	0.924557	0.979686
ENSMUSG00000006154	Eps8l1	8.03881	10.6127	10.4219	16.956	24.0424	16.9048	28.1749	23.4373	17.3236	0.323341	0.1306	2.47581	0.0132934	NA
ENSMUSG00000006169	Clint1	1413.83	1513.76	1559.49	1439.27	1426.92	1465.09	1487.85	1560.75	1483.37	0.00377392	0.0645342	0.0584794	0.953367	0.987588
ENSMUSG00000006191	Cdkal1	186.902	215.149	240.65	187.513	156.276	247.938	170.133	177.95	197.814	-0.104664	0.119787	-0.873747	0.382256	0.716946
ENSMUSG00000006205	Htra1	35.1698	53.0636	56.8465	78.7956	25.2445	49.7754	34.6768	20.8331	44.3007	-0.339364	0.13808	-2.45774	0.0139813	NA
ENSMUSG00000006215	Zbtb17	193.936	253.74	235.913	187.513	210.371	216.945	206.977	235.241	217.58	-0.00125798	0.108547	-0.0115892	0.990753	0.996738
ENSMUSG00000006219	Fblim1	387.873	371.445	390.346	341.115	254.85	331.523	312.091	299.476	336.09	-0.269775	0.0955874	-2.82228	0.00476832	0.0780618
ENSMUSG00000006221	Hspb7	36.1746	18.3311	58.7414	20.9457	30.053	22.5398	34.6768	18.229	29.9614	-0.123706	0.132323	-0.93488	0.34985	NA
ENSMUSG00000006235	Epor	151.733	146.648	163.907	126.671	110.595	119.273	99.6957	111.978	128.813	-0.317542	0.117619	-2.69975	0.00693914	0.0962485
ENSMUSG00000006262	Mob1b	241.164	154.367	235.913	284.262	234.414	226.337	237.319	265.623	234.925	0.0567712	0.119863	0.473633	0.635761	0.871978
ENSMUSG00000006273	Atp6v1b2	4995.11	5582.29	5720.66	5011	4309.6	4811.31	4841.74	4803.78	5009.44	-0.171863	0.0667703	-2.57394	0.0100548	0.120341
ENSMUSG00000006276	Eps15l1	270.305	242.163	285.18	281.27	245.233	224.459	292.585	302.081	267.909	-0.0150565	0.104915	-0.143511	0.885887	0.969429
ENSMUSG00000006281	Tep1	492.377	520.988	519.198	539.6	617.89	592.609	543.992	629.335	556.999	0.184432	0.0796433	2.31573	0.020573	0.179844
ENSMUSG00000006288	Ttc5	367.776	382.058	370.45	354.081	260.86	238.546	358.688	302.081	329.317	-0.287446	0.10443	-2.75252	0.00591381	0.087984
ENSMUSG00000006289	Osgep	563.721	589.488	550.464	554.561	504.891	512.78	524.486	502.6	537.874	-0.131811	0.0760418	-1.73341	0.0830231	0.366351
ENSMUSG00000006299	Aamp	1678.1	1682.6	1639.07	1533.02	1553.14	1506.41	1669.9	1543.39	1600.7	-0.0556737	0.0644923	-0.86326	0.387994	0.720585
ENSMUSG00000006301	Tmbim1	5383.99	5381.61	4921.01	4635.97	4588.5	4837.6	4787.56	4784.68	4915.12	-0.0918016	0.0629825	-1.45757	0.144958	0.486653
ENSMUSG00000006304	Arpc2	8046.85	7620.89	7840.08	7808.74	8954.6	8504.07	8632.35	8395.76	8225.42	0.134176	0.0506222	2.65054	0.00803641	0.104869
ENSMUSG00000006307	Kmt2b	45.2183	37.6269	60.6363	63.8344	51.6912	53.532	49.8478	64.2355	53.3278	0.0491234	0.137638	0.356903	0.721164	NA
ENSMUSG00000006310	Zbtb32	12.0582	11.5775	14.2116	8.97671	9.61697	15.0265	14.0874	15.6249	12.6475	0.063655	0.125249	0.508229	0.611293	NA
ENSMUSG00000006315	Tmem147	421.033	386.882	333.5	336.128	444.785	415.108	327.262	352.427	377.14	0.0484733	0.103205	0.469682	0.638583	0.872239
ENSMUSG00000006333	Rps9	1527.37	1495.43	1587.91	1431.29	1793.56	1672.64	1603.8	1657.97	1596.25	0.145569	0.0648715	2.24396	0.0248351	0.197337
ENSMUSG00000006335	Tfpt	109.529	84.9017	86.2172	89.7671	94.9676	110.821	97.5284	108.506	97.7797	0.114288	0.124336	0.919194	0.357994	0.699974
ENSMUSG00000006344	Ggt5	47.228	41.4861	39.7926	63.8344	31.2551	42.2621	33.5931	35.59	41.8802	-0.223244	0.13886	-1.60769	0.107904	NA
ENSMUSG00000006356	Crip2	422.037	445.734	455.72	362.061	554.178	587.913	538.573	462.669	478.611	0.299624	0.0939821	3.18809	0.00143214	0.036738
ENSMUSG00000006360	Crip1	19838.8	15813.9	16812.4	16068.3	34012.8	23296.7	20202.5	22895.6	21117.6	0.373323	0.129981	2.87214	0.00407702	0.0727999
ENSMUSG00000006362	Cbfa2t3	310.499	282.684	277.601	291.244	326.977	364.393	298.003	338.539	311.243	0.169391	0.0938138	1.80561	0.0709791	0.338863
ENSMUSG00000006369	Fbln1	12.0582	4.82396	13.2642	12.9664	6.01061	13.1482	11.9201	4.34024	9.81649	-0.0570628	0.111605	-0.511293	0.609146	NA
ENSMUSG00000006373	Pgrmc1	1216.87	1150.03	1235.46	1097.15	1251.41	1071.58	1180.09	1060.75	1157.92	-0.0406381	0.0748111	-0.54321	0.586985	0.845229
ENSMUSG00000006378	Gcat	47.228	44.3804	49.267	38.8991	34.8615	55.4103	40.095	31.2497	42.6739	-0.0801467	0.138855	-0.577198	0.563805	NA
ENSMUSG00000006386	Tek	3.01455	4.82396	18.0014	14.9612	14.4255	11.2699	11.9201	3.47219	10.2361	-0.00162367	0.104217	-0.0155797	0.98757	NA
ENSMUSG00000006390	Elovl1	1870.03	1722.15	1818.14	1744.47	1937.82	1695.18	1792.36	1698.77	1784.87	-0.00687485	0.0662806	-0.103724	0.917389	0.978569
ENSMUSG00000006392	Med8	371.795	379.163	374.24	386.996	389.487	404.777	415.038	435.76	394.657	0.110863	0.0837779	1.3233	0.185737	0.538087
ENSMUSG00000006395	Hyi	101.49	105.162	91.9019	74.8059	105.787	111.76	79.1064	97.2213	95.9043	0.0540761	0.128081	0.422202	0.672878	0.888779
ENSMUSG00000006398	Cdc20	76.3687	158.226	78.6377	104.728	132.233	122.091	107.281	156.249	116.977	0.190853	0.135408	1.40946	0.158698	0.502962
ENSMUSG00000006403	Adamts4	33.1601	32.8029	34.1079	103.731	34.8615	65.741	59.6007	26.0414	48.7558	-0.0442341	0.132028	-0.335037	0.737597	NA
ENSMUSG00000006411	Nectin4	103.5	126.388	93.7968	99.7412	76.9357	111.76	96.4447	105.902	101.808	-0.0759404	0.126813	-0.598839	0.54928	0.826191
ENSMUSG00000006412	Pfdn2	352.703	279.79	321.183	247.358	382.274	339.975	338.098	334.198	324.447	0.178994	0.102678	1.74325	0.0812904	0.362167
ENSMUSG00000006418	Rnf114	881.254	1039.08	906.702	1022.35	851.102	926.01	957.946	914.922	937.421	-0.0698185	0.0768249	-0.9088	0.363456	0.703333
ENSMUSG00000006423	C330007P06Rik	668.226	627.115	623.417	605.429	509.699	544.712	564.581	531.245	584.303	-0.211576	0.0767245	-2.75761	0.00582254	0.0872315
ENSMUSG00000006435	Neurl1a	29.1407	23.155	11.3693	13.9638	28.8509	27.2356	23.8403	26.0414	22.9496	0.166786	0.134406	1.24091	0.214638	NA
ENSMUSG00000006442	Srm	419.023	398.459	383.714	326.154	348.615	345.61	411.787	391.489	378.106	-0.0241572	0.0958542	-0.252021	0.801025	0.942062
ENSMUSG00000006456	Rbm14	417.013	512.305	483.195	464.794	414.732	493.058	537.49	536.453	482.38	0.0695553	0.0939439	0.740392	0.459062	0.769876
ENSMUSG00000006457	Actn3	2.0097	3.85917	3.78977	6.98189	4.80848	6.5741	6.50189	2.60414	4.64114	0.0355214	0.0910547	0.39011	0.696455	NA
ENSMUSG00000006463	Zdhhc24	132.64	123.493	126.957	117.695	92.5633	112.699	117.034	99.8255	115.363	-0.185639	0.119157	-1.55793	0.119249	0.443503
ENSMUSG00000006464	Bbs1	46.2232	31.8381	33.1605	41.8913	33.6594	26.2964	48.7642	26.9095	36.0928	-0.086553	0.138882	-0.62321	0.533146	NA
ENSMUSG00000006471	Ndor1	228.101	215.149	175.277	214.444	188.733	219.763	213.479	256.074	213.877	0.065727	0.11006	0.597192	0.550379	0.826487
ENSMUSG00000006476	Nsmf	403.95	525.812	384.661	428.887	450.795	486.484	441.045	426.211	443.481	0.042753	0.0962414	0.444227	0.656878	0.881976
ENSMUSG00000006494	Pdk1	298.441	329.959	395.083	373.032	311.349	375.663	423.707	364.58	358.977	0.066869	0.102929	0.64966	0.515912	0.806473
ENSMUSG00000006498	Ptbp1	1228.93	1509.9	1310.31	1305.61	1294.68	1357.08	1356.73	1401.9	1345.64	0.0141851	0.0732614	0.193623	0.846471	0.95902
ENSMUSG00000006517	Mvd	156.757	207.43	159.17	137.643	149.063	170.927	152.794	164.929	162.339	-0.0383897	0.117158	-0.327674	0.743158	0.918128
ENSMUSG00000006519	Cyba	3976.2	3902.58	3584.17	3370.26	5218.41	5004.77	4137.37	4210.9	4175.58	0.293564	0.0811718	3.61658	0.000298517	0.0133062
ENSMUSG00000006526	Tmem110	232.121	281.719	225.491	268.304	238.02	236.668	261.159	303.817	255.912	0.0396422	0.106059	0.373774	0.708573	0.903654
ENSMUSG00000006527	Sfmbt1	428.067	455.382	444.35	408.939	351.019	372.846	339.182	389.753	398.692	-0.227728	0.0863247	-2.63804	0.00833868	0.10687
ENSMUSG00000006585	Cdt1	203.985	248.916	246.335	197.488	164.691	240.424	175.551	194.443	208.979	-0.1613	0.114992	-1.40271	0.160704	0.506646
ENSMUSG00000006589	Aprt	814.934	728.418	840.381	771	807.825	736.3	812.737	739.577	781.396	-0.0261573	0.0761028	-0.34371	0.731065	0.913651
ENSMUSG00000006599	Gtf2h1	670.236	754.467	750.374	715.145	716.464	679.95	721.71	770.826	722.397	-0.000355759	0.0758233	-0.00469194	0.996256	0.998683
ENSMUSG00000006611	Hfe	1458.04	1532.09	1500.75	1417.32	1256.22	1295.1	1211.52	1132.8	1350.48	-0.255118	0.0670528	-3.80473	0.000141957	0.00789
ENSMUSG00000006641	Slc5a6	116.563	129.282	113.693	115.7	114.201	120.212	112.699	119.791	117.768	-0.018447	0.11677	-0.157977	0.874475	0.966689
ENSMUSG00000006651	Aplp1	104.505	115.775	142.116	90.7645	75.7336	77.0109	80.19	112.846	99.8676	-0.254992	0.131467	-1.93959	0.0524298	0.291996
ENSMUSG00000006673	Qrich1	1347.51	1394.12	1336.84	1229.81	1193.71	1318.58	1272.2	1254.33	1293.39	-0.0699202	0.0673814	-1.03768	0.299419	0.661913
ENSMUSG00000006676	Usp19	707.415	841.299	718.161	870.741	816.24	911.922	838.744	962.665	833.398	0.153361	0.0854488	1.79477	0.0726902	0.34268
ENSMUSG00000006678	Pola1	92.4463	109.986	97.5865	112.708	127.425	77.9501	87.7756	74.6521	97.5662	-0.118611	0.13089	-0.90619	0.364835	0.703835
ENSMUSG00000006699	Cdc42	14523.1	12847.2	15003.7	13138.9	13672.9	13052.4	13081.8	12204.8	13440.6	-0.0886232	0.0651308	-1.3607	0.17361	0.524031
ENSMUSG00000006705	Pknox1	371.795	391.706	434.876	406.944	361.838	410.412	382.528	395.83	394.491	-0.0430115	0.0873662	-0.492313	0.622498	0.864965
ENSMUSG00000006715	Gmnn	153.742	128.317	184.751	141.633	193.541	160.596	125.703	153.644	155.241	0.0407281	0.122192	0.333313	0.738898	0.917155
ENSMUSG00000006717	Acot13	371.795	314.522	308.866	305.208	455.604	351.245	315.342	312.497	341.885	0.112845	0.107823	1.04658	0.295293	0.657961
ENSMUSG00000006728	Cdk4	1055.09	1109.51	1137.88	1035.31	1001.37	1038.71	1029.47	1045.13	1056.56	-0.0712833	0.0661625	-1.0774	0.281302	0.642955
ENSMUSG00000006731	B4galnt1	869.196	939.708	829.012	822.865	924.431	991.751	859.334	918.394	894.336	0.0871426	0.0748988	1.16347	0.244638	0.606477
ENSMUSG00000006732	Mettl1	33.1601	40.5213	28.4233	27.9275	32.4573	34.7488	42.2623	32.9858	34.0608	0.0648272	0.139077	0.466124	0.641127	NA
ENSMUSG00000006736	Tspan31	843.07	960.933	1036.5	859.769	857.112	833.033	892.927	825.513	888.607	-0.108909	0.0790941	-1.37695	0.168526	0.516036
ENSMUSG00000006740	Kif5b	1919.27	1939.23	2177.22	1937.97	2017.16	1749.65	1906.14	1951.37	1949.75	-0.0609873	0.0688353	-0.885988	0.375624	0.710678
ENSMUSG00000006763	Saal1	102.495	103.233	108.008	97.7464	92.5633	79.8284	82.3573	99.8255	95.7571	-0.155858	0.123636	-1.26063	0.207444	0.565203
ENSMUSG00000006782	Cnp	651.144	728.418	646.155	636.349	676.794	670.559	585.17	546.87	642.682	-0.0930675	0.0860421	-1.08165	0.279408	0.641037
ENSMUSG00000006784	Ttc25	2.0097	3.85917	10.4219	9.97412	7.21273	2.81747	1.08365	5.20829	5.32337	-0.0796743	0.0891331	-0.89388	0.371386	NA
ENSMUSG00000006800	Sulf2	7071.14	9007.3	7229.93	8525.88	7506.04	7667.28	7615.88	8343.67	7870.89	-0.0293289	0.0772325	-0.379748	0.704132	0.900953
ENSMUSG00000006818	Sod2	922.453	979.264	999.551	966.492	1013.39	935.401	966.615	947.04	966.276	-0.00303873	0.0674286	-0.0450659	0.964055	0.990818
ENSMUSG00000006850	Tmco6	35.1698	41.4861	43.5823	42.8887	27.6488	31.9314	27.0912	38.1941	35.999	-0.194195	0.139001	-1.39707	0.162393	NA
ENSMUSG00000006906	Stambp	352.703	314.522	375.187	340.118	340.2	309.922	365.19	335.934	341.722	-0.030188	0.0921883	-0.327461	0.743319	0.918128
ENSMUSG00000006920	Ezh1	507.45	513.269	540.989	545.584	503.689	586.974	517.984	506.94	527.86	0.00601489	0.081645	0.0736712	0.941272	0.984818
ENSMUSG00000006930	Hap1	18.0873	7.71834	4.73721	9.97412	13.2233	5.63495	8.66919	15.6249	10.4587	0.0195956	0.111952	0.175035	0.861052	NA
ENSMUSG00000006931	P3h4	3.01455	10.6127	10.4219	14.9612	3.60636	7.51326	6.50189	6.94438	7.94703	-0.113774	0.105938	-1.07397	0.282838	NA
ENSMUSG00000006932	Ctnnb1	2188.57	2548.02	2190.49	2237.2	1929.4	2205.14	2112.03	2203.97	2201.85	-0.108084	0.0710705	-1.5208	0.128311	0.458456
ENSMUSG00000006941	Eif1b	541.615	602.03	611.1	529.626	671.986	529.685	620.931	632.807	592.472	0.090904	0.0874046	1.04004	0.298323	0.661142
ENSMUSG00000006998	Psmd2	2523.18	2839.38	2492.72	2462.61	2410.25	2610.86	2559.58	2534.7	2554.16	-0.0266927	0.0646881	-0.412637	0.679873	0.891838
ENSMUSG00000007029	Vars	662.197	845.158	681.211	749.057	729.687	1003.02	924.352	1039.05	829.217	0.284548	0.0982747	2.89544	0.00378629	0.0700036
ENSMUSG00000007035	Msh5	18.0873	18.3311	28.4233	23.9379	20.4361	18.7832	19.5057	25.1734	21.5847	-0.0306436	0.135741	-0.22575	0.821396	NA
ENSMUSG00000007036	Abhd16a	436.105	493.974	488.88	434.872	403.913	450.796	423.707	468.746	450.124	-0.0743086	0.0864693	-0.859364	0.39014	0.722093
ENSMUSG00000007038	Neu1	1164.62	1307.29	1185.25	1305.61	1113.16	1188.97	1090.15	1182.28	1192.17	-0.108659	0.0700024	-1.55221	0.120611	0.445417
ENSMUSG00000007039	Ddah2	239.155	299.086	231.176	236.387	240.424	204.736	229.734	210.936	236.454	-0.154204	0.105368	-1.46347	0.143338	0.483557
ENSMUSG00000007041	Clic1	3864.66	3589.03	3581.33	3793.16	4274.74	3755.69	3987.83	3572.02	3802.31	0.0673369	0.0664915	1.01271	0.311197	0.670478
ENSMUSG00000007050	Lsm2	115.558	104.198	133.589	116.697	167.095	141.813	123.536	115.45	127.242	0.158926	0.122193	1.30061	0.193393	0.547926
ENSMUSG00000007080	Pole	46.2232	49.2044	48.3195	57.8499	90.1591	99.5507	80.19	81.5965	69.1367	0.527101	0.131869	3.99716	6.41072e-05	0.00444339
ENSMUSG00000007216	Zfp775	32.1552	60.7819	68.2158	55.8551	46.8827	42.2621	43.346	46.8746	49.5467	-0.149307	0.138663	-1.07676	0.281587	NA
ENSMUSG00000007338	Mrpl49	247.193	254.705	196.121	199.482	211.573	198.162	236.235	177.95	215.178	-0.101089	0.111694	-0.905052	0.365438	0.704267
ENSMUSG00000007379	Dennd2c	270.305	270.142	254.862	209.457	217.584	217.885	230.817	254.338	240.674	-0.103213	0.104326	-0.989329	0.322502	0.676603
ENSMUSG00000007411	Mark3	560.707	839.369	708.687	790.948	777.772	792.649	953.611	935.755	794.937	0.215135	0.101107	2.1278	0.0333541	0.232987
ENSMUSG00000007415	Gatad1	86.4172	79.113	71.0582	88.7697	98.5739	89.22	81.2737	98.9574	86.6729	0.126703	0.126713	0.999919	0.31735	0.673647
ENSMUSG00000007458	M6pr	2569.4	2985.07	2512.62	2564.35	2680.73	2634.34	2556.33	2552.06	2631.86	-0.0269366	0.0671267	-0.40128	0.688214	0.894741
ENSMUSG00000007476	Lrrc8a	46.2232	21.2254	42.6349	36.9043	45.6806	32.8705	23.8403	33.8539	35.4041	-0.0506712	0.138274	-0.366454	0.714026	NA
ENSMUSG00000007564	Ppp2r1a	2158.42	2305.85	2411.24	2155.41	1976.29	2300.94	2071.94	2190.08	2196.27	-0.0749189	0.0682215	-1.09817	0.27213	0.635276
ENSMUSG00000007570	Fance	139.674	191.994	151.591	183.524	161.084	175.623	160.38	178.818	167.836	0.0172655	0.113886	0.151604	0.8795	0.96782
ENSMUSG00000007589	Tinf2	203.985	215.149	141.169	171.555	174.308	170.927	227.566	215.276	189.992	0.0817088	0.119806	0.68201	0.495233	0.794702
ENSMUSG00000007603	Dus3l	264.276	265.318	252.967	261.322	176.712	229.155	237.319	211.804	237.359	-0.238715	0.102416	-2.33084	0.0197618	0.175651
ENSMUSG00000007610	Gtpbp3	45.2183	64.6411	61.5837	43.8861	61.3082	53.532	47.6806	55.5551	54.1756	0.00875531	0.136719	0.0640385	0.94894	0.98609
ENSMUSG00000007613	Tgfbr1	2414.66	2201.66	2271.97	2495.53	2186.66	2147.85	2502.15	2250.85	2308.91	-0.0432979	0.0689338	-0.628109	0.529933	0.814127
ENSMUSG00000007617	Homer1	82.3978	127.353	132.642	102.733	109.393	93.9158	100.779	103.298	106.564	-0.0919549	0.127409	-0.721731	0.47046	0.777236
ENSMUSG00000007646	Rad51c	15.0728	18.3311	17.054	11.9689	21.6382	15.9657	8.66919	11.2846	14.998	-0.0386628	0.127027	-0.304368	0.760848	NA
ENSMUSG00000007655	Cav1	392.897	219.973	469.931	497.709	365.445	281.747	266.578	228.297	340.322	-0.224975	0.138961	-1.61898	0.105452	0.41482
ENSMUSG00000007656	Arpp19	798.857	737.101	764.586	678.24	901.591	787.014	711.957	809.888	773.654	0.0965335	0.0832734	1.15924	0.24636	0.608066
ENSMUSG00000007659	Bcl2l1	742.585	746.749	649.945	613.409	668.379	722.212	585.17	698.778	678.404	-0.035761	0.087903	-0.406823	0.684138	0.892615
ENSMUSG00000007670	Khsrp	152.737	159.191	126.957	232.397	234.414	204.736	203.726	270.831	198.124	0.32121	0.125053	2.56859	0.0102112	0.121295
ENSMUSG00000007721	Ccdc124	585.828	631.939	617.732	512.67	586.635	589.791	602.509	609.369	592.059	0.0220756	0.0818187	0.269812	0.787305	0.93573
ENSMUSG00000007739	Cct4	1200.8	1155.82	1348.21	1163.98	1270.64	1186.16	1263.53	1166.66	1219.47	0.0039193	0.0717967	0.0545888	0.956466	0.988755
ENSMUSG00000007777	0610009B22Rik	195.946	181.381	174.329	183.524	212.775	192.527	186.388	203.991	191.358	0.0947462	0.103736	0.913336	0.361066	0.702577
ENSMUSG00000007783	Cpt1c	13.0631	10.6127	13.2642	7.9793	8.41485	9.39158	6.50189	14.7568	10.498	-0.0438331	0.118373	-0.370297	0.711161	NA
ENSMUSG00000007812	Zfp655	1000.83	1103.72	1246.83	1158.99	1021.8	906.287	1028.38	892.353	1044.9	-0.208936	0.0810923	-2.57652	0.00998006	0.120009
ENSMUSG00000007815	Rhoa	7058.07	7064.21	6379.13	6401.39	7080.49	6845.52	6130.2	6329.8	6661.1	-0.026437	0.0657453	-0.402112	0.687602	0.894741
ENSMUSG00000007817	Zmiz1	1468.09	1104.69	1192.83	1382.41	1274.25	1515.8	1173.59	1602.42	1339.26	0.0978714	0.0970069	1.00891	0.313017	0.671309
ENSMUSG00000007827	Ankrd26	102.495	81.0425	92.8493	98.7438	70.9251	79.8284	65.0189	92.0131	85.3645	-0.190659	0.128902	-1.4791	0.139115	0.478298
ENSMUSG00000007833	Aldh16a1	514.484	512.305	488.88	456.815	467.625	444.222	422.623	421.003	465.995	-0.153012	0.0827041	-1.85011	0.0642973	0.324878
ENSMUSG00000007836	Hnrnpa0	43.2086	30.8733	45.4772	52.8628	75.7336	58.2278	56.3497	59.8953	52.8286	0.30704	0.137415	2.2344	0.0254565	NA
ENSMUSG00000007837	Prrg2	122.592	105.162	97.5865	83.7826	127.425	118.334	102.947	132.811	111.33	0.171456	0.124369	1.3786	0.168017	0.515931
ENSMUSG00000007850	Hnrnph1	766.701	806.566	847.961	861.764	870.336	727.847	775.893	709.195	795.783	-0.084593	0.080271	-1.05384	0.291955	0.65392
ENSMUSG00000007867	Ift43	66.3202	41.4861	60.6363	37.9017	45.6806	53.532	36.8441	39.9302	47.7914	-0.121399	0.138813	-0.874551	0.381818	NA
ENSMUSG00000007872	Id3	264.276	276.895	252.02	418.913	263.265	317.435	348.935	360.24	312.747	0.0696549	0.11967	0.582057	0.560528	0.831612
ENSMUSG00000007877	Tcap	2.0097	2.89438	10.4219	0	14.4255	3.75663	9.75284	6.07633	6.16715	0.119056	0.0871135	1.36668	0.171726	NA
ENSMUSG00000007880	Arid1a	361.746	325.135	327.815	377.022	355.828	360.637	314.258	384.545	350.873	0.0232408	0.0932017	0.24936	0.803083	0.942881
ENSMUSG00000007888	Crlf1	5.02426	3.85917	7.57954	18.9508	10.8191	5.63495	6.50189	1.7361	7.51323	-0.0764511	0.0969122	-0.78887	0.430188	NA
ENSMUSG00000007891	Ctsd	43284	44287.8	36925.6	39044.7	37580.7	35987.6	37336	41415.4	39482.7	-0.0956882	0.0694251	-1.3783	0.168112	0.515931
ENSMUSG00000007892	Rplp1	776.75	790.165	901.017	721.129	1205.73	1049.98	986.12	977.422	926.039	0.359615	0.0855823	4.20197	2.64599e-05	0.00266595
ENSMUSG00000007950	Abhd8	66.3202	89.7257	79.5851	60.8421	70.9251	73.2543	66.1026	59.8953	70.8313	-0.0894478	0.132731	-0.673901	0.500375	0.796359
ENSMUSG00000007987	Ift22	277.339	232.515	219.807	231.4	221.19	253.573	205.893	229.165	233.86	-0.0632963	0.104317	-0.606767	0.544006	0.823368
ENSMUSG00000008035	Mid1ip1	666.216	732.277	627.207	613.409	572.21	673.376	454.049	589.404	616.018	-0.174241	0.0979239	-1.77935	0.0751817	0.348567
ENSMUSG00000008036	Ap2s1	864.172	870.243	1077.24	979.459	1307.91	1015.23	897.261	908.846	990.045	0.102756	0.100624	1.02119	0.307165	0.668209
ENSMUSG00000008090	Fgfrl1	22.1067	39.5565	27.4758	26.9301	28.8509	23.4789	37.9277	35.59	30.2396	0.0514498	0.138257	0.372132	0.709794	NA
ENSMUSG00000008140	Emc10	569.751	494.938	487.933	503.693	543.359	600.122	507.148	590.272	537.152	0.112995	0.0853226	1.32433	0.185395	0.538034
ENSMUSG00000008167	Fbxw9	135.655	137.965	136.432	122.682	158.68	151.204	141.958	130.207	139.348	0.0976725	0.113688	0.859125	0.390272	0.722122
ENSMUSG00000008200	Fnbp4	299.446	374.339	329.71	423.9	311.349	378.481	355.437	361.108	354.221	-0.0160969	0.102559	-0.156953	0.875282	0.967118
ENSMUSG00000008206	Cers4	89.4317	67.5355	71.0582	64.8318	72.1273	94.8549	80.19	59.8953	74.9906	0.0435695	0.133551	0.326239	0.744244	0.918472
ENSMUSG00000008226	Scrn3	201.975	197.782	196.121	214.444	198.35	183.136	195.057	203.123	198.748	-0.0466461	0.101883	-0.45784	0.647067	0.877639
ENSMUSG00000008301	Phax	438.115	449.593	483.195	400.96	442.381	390.69	404.201	442.704	431.48	-0.0689211	0.0878567	-0.784472	0.432763	0.751387
ENSMUSG00000008305	Tle1	274.324	305.839	287.075	265.312	250.041	239.485	244.905	300.344	270.916	-0.108217	0.100023	-1.08193	0.279285	0.641037
ENSMUSG00000008307	1700109H08Rik	6.02911	7.71834	11.3693	10.9715	6.01061	3.75663	6.50189	6.94438	7.41272	-0.11771	0.108292	-1.08696	0.277053	NA
ENSMUSG00000008318	Relt	77.3735	74.289	110.851	85.7775	92.5633	114.577	95.3611	94.6172	93.1762	0.131079	0.12876	1.01801	0.308674	0.669227
ENSMUSG00000008333	Snrpb2	307.484	280.755	292.76	310.195	451.997	299.591	321.844	290.796	319.428	0.153179	0.110576	1.38528	0.165966	0.512643
ENSMUSG00000008348	Ubc	5168.95	5979.78	6924.85	5604.46	5017.65	5648.1	5885.3	6184.84	5801.74	-0.0525176	0.0837624	-0.626982	0.530671	0.814274
ENSMUSG00000008373	Prpf31	620.998	622.291	535.305	553.564	503.689	556.921	533.155	549.474	559.425	-0.10863	0.0819613	-1.32538	0.185044	0.538034
ENSMUSG00000008384	Sertad1	1054.09	1138.45	1584.12	1211.86	1450.96	1282.89	1274.37	1293.39	1286.27	0.0749478	0.096259	0.778606	0.436212	0.753959
ENSMUSG00000008393	Carhsp1	1120.41	1399.91	1144.51	1086.18	1154.04	1182.4	1281.96	1245.65	1201.88	0.0307672	0.0817977	0.376138	0.706815	0.902461
ENSMUSG00000008398	Elk3	1120.41	1147.14	1067.77	1067.23	1346.38	1263.17	1186.6	1227.42	1178.26	0.177651	0.0677782	2.62106	0.00876558	0.110475
ENSMUSG00000008429	Herpud2	1134.48	1315.01	1303.68	1218.84	1144.42	1094.12	1141.08	1092	1180.45	-0.143596	0.0696593	-2.0614	0.0392651	0.254006
ENSMUSG00000008435	Rdh13	34.1649	62.7115	79.5851	54.8577	79.34	61.9844	56.3497	32.1178	57.6389	-0.0100331	0.138883	-0.0722417	0.94241	0.984891
ENSMUSG00000008450	Nutf2	198.961	227.691	199.91	160.583	265.669	205.676	234.068	212.672	213.154	0.17335	0.111679	1.55221	0.120612	0.445417
ENSMUSG00000008475	Arpc5	10916.7	10455.5	10935.4	9545.24	11268.7	10251.8	10895	10163.1	10553.9	0.0232891	0.062793	0.370886	0.710722	0.904889
ENSMUSG00000008496	Pou2f2	50.2426	51.134	58.7414	65.8292	56.4997	72.3152	47.6806	53.819	57.0327	0.0185635	0.136109	0.136387	0.891515	0.970529
ENSMUSG00000008540	Mgst1	872.211	617.467	757.954	705.17	801.815	694.977	743.383	659.716	731.587	-0.0238609	0.094313	-0.252997	0.80027	0.941988
ENSMUSG00000008575	Nfib	16.0776	20.2606	41.6875	42.8887	18.0318	36.6272	26.0076	14.7568	27.0422	-0.112292	0.130823	-0.858351	0.390699	NA
ENSMUSG00000008604	Ubqln4	218.053	207.43	223.596	233.394	229.605	259.208	208.061	252.602	228.994	0.0915771	0.102066	0.897234	0.369594	0.706392
ENSMUSG00000008668	Rps18	636.071	666.671	648.05	576.504	934.048	729.726	676.197	684.022	693.911	0.222336	0.094457	2.35383	0.0185809	0.170022
ENSMUSG00000008682	Rpl10	1359.56	1234.93	1406	1285.66	1509.86	1273.5	1352.39	1291.65	1339.2	0.0338103	0.0738298	0.457949	0.646989	0.877639
ENSMUSG00000008683	Rps15a	270.305	238.304	265.284	236.387	427.955	344.671	279.581	284.72	293.401	0.319601	0.111676	2.86187	0.00421149	0.0742079
ENSMUSG00000008690	Ncaph2	779.764	907.869	834.696	858.772	934.048	864.025	844.162	845.478	858.602	0.0402046	0.0741062	0.542526	0.587456	0.845501
ENSMUSG00000008730	Hipk1	391.892	358.903	449.088	472.773	405.115	326.827	433.46	434.024	409.01	-0.0545647	0.102553	-0.532062	0.594683	0.848803
ENSMUSG00000008734	Gprc5b	98.4754	84.9017	83.3749	78.7956	104.585	123.969	86.6919	105.902	95.8368	0.204709	0.126445	1.61896	0.105456	0.41482
ENSMUSG00000008763	Man1a2	628.032	632.904	619.627	590.468	608.273	602	603.592	561.627	605.815	-0.0536014	0.0748149	-0.716454	0.473711	0.780164
ENSMUSG00000008822	Acyp1	67.325	46.31	38.8451	50.868	63.7124	52.5928	44.4296	40.7982	50.6102	-0.010137	0.138425	-0.0732308	0.941622	NA
ENSMUSG00000008845	Cd163	4481.64	4415.85	5649.6	6993.85	4600.52	4333.27	4238.15	4364.54	4884.68	-0.251347	0.100138	-2.51	0.012073	0.133387
ENSMUSG00000008855	Hdac5	819.959	749.644	723.846	788.953	754.932	815.189	758.554	840.27	781.418	0.0386072	0.0749026	0.515432	0.606251	0.855618
ENSMUSG00000008859	Rala	696.362	653.164	658.472	656.297	734.496	649.897	655.608	638.015	667.789	0.0050107	0.0760042	0.0659266	0.947436	0.985868
ENSMUSG00000008892	Vdac3	1161.61	1079.6	1117.98	990.43	1081.91	1047.16	1100.99	1013.01	1074.09	-0.0340639	0.0713165	-0.477644	0.632904	0.870956
ENSMUSG00000008958	Vps72	330.596	330.924	308.866	277.281	310.147	322.131	290.418	289.928	307.536	-0.0360617	0.094078	-0.383317	0.701484	0.899867
ENSMUSG00000008976	Gabpa	686.313	656.059	781.64	752.049	724.879	602.939	649.106	680.549	691.692	-0.103895	0.0832031	-1.24869	0.211778	0.570913
ENSMUSG00000009013	Dynll1	1933.33	1816.7	2223.65	1700.59	2171.03	1908.37	1964.66	2027.76	1968.26	0.0657928	0.0797379	0.825114	0.409307	0.735949
ENSMUSG00000009030	Pdcl	539.605	444.769	493.617	506.685	343.807	431.073	445.38	418.399	452.917	-0.23864	0.0929835	-2.56648	0.0102737	0.121556
ENSMUSG00000009035	Tmem184b	776.75	859.63	651.84	713.15	717.666	714.699	643.687	783.847	732.659	-0.0605019	0.089369	-0.67699	0.498412	0.796304
ENSMUSG00000009073	Nf2	327.581	505.551	354.343	416.918	377.466	426.378	478.973	449.649	417.107	0.0908002	0.108336	0.838132	0.401957	0.731895
ENSMUSG00000009076	Zmat5	170.825	155.332	135.484	134.651	201.956	146.509	189.639	179.686	164.26	0.204842	0.116022	1.76554	0.0774725	0.354168
ENSMUSG00000009079	Ewsr1	1661.02	1752.06	1654.23	1689.62	1805.59	1756.23	1778.27	1642.35	1717.42	0.0441373	0.0613343	0.719619	0.47176	0.778353
ENSMUSG00000009090	Ap1b1	3113.03	3515.7	3964.1	4228.03	3323.86	4008.33	3762.43	3782.08	3712.2	0.00510395	0.0850258	0.0600283	0.952133	0.987232
ENSMUSG00000009112	Bcl2l13	233.125	317.417	232.123	269.301	269.275	214.128	269.829	242.185	255.923	-0.0669552	0.109285	-0.612664	0.540098	0.819937
ENSMUSG00000009185	Ccl8	623.008	445.734	1183.36	974.472	822.251	680.889	666.444	341.143	717.162	-0.11777	0.130338	-0.903569	0.366224	0.704439
ENSMUSG00000009207	Lnpk1	268.295	265.318	241.598	265.312	289.711	223.52	237.319	250.866	255.242	-0.0493172	0.100586	-0.490301	0.623921	0.865812
ENSMUSG00000009281	Rarres2	2.0097	2.89438	7.57954	9.97412	7.21273	9.39158	5.41824	1.7361	5.77705	0.00858051	0.0917913	0.0934784	0.925523	NA
ENSMUSG00000009291	Pttg1ip	2858.8	2950.33	2820.54	2550.38	2665.1	2626.82	2545.49	2459.18	2684.58	-0.112538	0.0637504	-1.76529	0.0775148	0.354168
ENSMUSG00000009292	Trpm2	29.1407	58.8523	48.3195	58.8473	34.8615	71.376	42.2623	52.0829	49.4678	0.023461	0.13903	0.168747	0.865995	NA
ENSMUSG00000009293	Ube2g2	608.94	848.052	737.11	677.243	682.805	688.403	703.288	666.661	701.563	-0.0596806	0.0895726	-0.666282	0.505231	0.798648
ENSMUSG00000009406	Elk1	62.3008	72.3594	67.2684	79.793	60.1061	81.7067	89.9429	65.1036	72.3226	0.0496302	0.132824	0.373654	0.708661	0.903654
ENSMUSG00000009418	Nav1	998.822	809.461	804.378	978.461	901.591	913.801	778.06	1059.89	905.557	0.0229109	0.0940568	0.243585	0.807552	0.943862
ENSMUSG00000009470	Tnpo1	454.193	437.051	512.566	585.481	531.337	449.857	524.486	578.12	509.136	0.057433	0.0979321	0.586458	0.557568	0.830357
ENSMUSG00000009535	Rnmt	346.674	347.325	403.61	349.094	341.402	345.61	352.186	344.615	353.815	-0.0571241	0.0888669	-0.642805	0.520351	0.810279
ENSMUSG00000009545	Kcnq1	10.0485	7.71834	16.1065	10.9715	9.61697	19.7223	14.0874	8.68048	12.119	0.0546824	0.120501	0.45379	0.64998	NA
ENSMUSG00000009549	Srp14	902.356	840.334	922.809	777.982	1069.89	925.07	887.508	775.167	887.639	0.0748445	0.0899217	0.83233	0.405223	0.733783
ENSMUSG00000009555	Cdk9	1192.76	1277.38	1286.63	1295.64	1239.39	1251.9	1275.45	1278.63	1262.22	-0.00176413	0.0629405	-0.0280286	0.977639	0.993641
ENSMUSG00000009563	Tor2a	272.315	344.431	270.021	265.312	265.669	302.409	296.92	305.553	290.329	0.0209475	0.101025	0.20735	0.835737	0.954605
ENSMUSG00000009566	Fpgs	65.3153	68.5002	78.6377	56.8525	68.5209	78.8893	94.2775	86.8048	74.7248	0.191287	0.131438	1.45534	0.145576	0.487262
ENSMUSG00000009569	Mkl2	85.4123	111.916	126.01	75.8033	121.414	104.247	108.365	111.978	105.643	0.108162	0.128452	0.842042	0.399765	0.730064
ENSMUSG00000009575	Cbx5	108.524	116.74	127.905	119.689	159.882	134.3	115.95	92.8811	121.984	0.0576903	0.126253	0.456943	0.647712	0.877698
ENSMUSG00000009585	Apobec3	276.334	242.163	268.126	269.301	254.85	277.052	237.319	242.185	258.416	-0.0527038	0.0972844	-0.541749	0.587991	0.846001
ENSMUSG00000009614	Sardh	88.4269	82.0073	77.6903	78.7956	84.1485	69.4977	136.54	91.145	88.5314	0.138965	0.133963	1.03734	0.29958	0.662105
ENSMUSG00000009621	Vav2	163.791	229.621	185.699	358.071	304.137	303.348	332.68	482.635	294.998	0.278608	0.138693	2.00881	0.0445571	0.271819
ENSMUSG00000009630	Ppp2cb	54.262	64.6411	82.4275	220.428	245.233	58.2278	183.137	99.8255	126.023	0.0767744	0.102702	0.747548	0.454733	0.767606
ENSMUSG00000009640	Dmap1	165.8	155.332	180.014	167.565	164.691	127.725	147.376	136.283	155.598	-0.175539	0.112307	-1.56303	0.118047	0.441584
ENSMUSG00000009647	Mcu	257.242	266.283	288.022	256.335	323.371	255.451	313.175	314.233	284.264	0.147792	0.0985958	1.49897	0.133882	0.46851
ENSMUSG00000009681	Bcr	12.0582	10.6127	23.6861	21.9431	10.8191	33.8097	24.9239	17.361	19.4017	0.105432	0.127067	0.829736	0.406688	NA
ENSMUSG00000009687	Fxyd5	7670.03	6381.14	7187.3	6512.1	7701.99	7394.93	7481.51	7045.94	7171.87	0.0882524	0.0673118	1.3111	0.189825	0.544378
ENSMUSG00000009733	Tfcp2	58.2814	33.7677	54.9516	39.8965	56.4997	48.8362	59.6007	58.1592	51.2491	0.144121	0.13784	1.04557	0.295761	NA
ENSMUSG00000009739	Pou6f1	46.2232	55.9579	53.0568	67.824	48.0848	77.0109	67.1862	50.3468	58.2113	0.0725066	0.137108	0.528829	0.596924	0.850025
ENSMUSG00000009741	Ubp1	520.513	603.96	522.988	591.465	607.071	596.365	604.676	689.23	592.034	0.14287	0.0838878	1.70311	0.0885472	0.378935
ENSMUSG00000009772	Nuak2	933.507	904.01	841.329	948.539	734.496	864.025	859.334	891.485	872.091	-0.103123	0.0780379	-1.32145	0.186351	0.538652
ENSMUSG00000009828	Ick	140.679	135.071	118.43	117.695	129.829	135.239	97.5284	105.902	122.547	-0.0954507	0.121738	-0.784067	0.433001	0.751387
ENSMUSG00000009863	Sdhb	1582.64	1687.42	1520.64	1554.97	2171.03	1714.9	1785.85	1683.14	1712.58	0.192333	0.0800727	2.40198	0.0163068	0.15737
ENSMUSG00000009894	Snap47	214.033	222.867	243.493	195.493	133.435	195.345	213.479	157.985	197.016	-0.246959	0.117345	-2.10455	0.0353303	0.241941
ENSMUSG00000009905	Kdsr	544.629	490.114	495.512	457.812	419.54	445.161	369.524	475.69	462.248	-0.188365	0.0913232	-2.06262	0.0391487	0.254006
ENSMUSG00000009907	Vps4b	2074.01	1959.49	2019.95	1873.14	1834.44	1829.48	1747.93	1746.51	1885.62	-0.13986	0.0610262	-2.2918	0.021917	0.185174
ENSMUSG00000009927	Rps25	744.595	670.531	712.476	684.225	1358.4	991.751	733.63	888.881	848.061	0.396224	0.111916	3.54038	0.000399547	0.016427
ENSMUSG00000009995	Taz	616.979	606.854	621.522	630.365	501.284	560.677	549.41	556.419	580.439	-0.174299	0.0759472	-2.295	0.0217331	0.184485
ENSMUSG00000010021	Kif19a	5.02426	3.85917	8.52698	7.9793	1.20212	3.75663	8.66919	3.47219	5.31123	-0.0726448	0.0932936	-0.778669	0.436175	NA
ENSMUSG00000010025	Aldh3a2	769.716	838.404	889.648	758.033	760.943	677.133	789.98	678.813	770.334	-0.150006	0.0815585	-1.83925	0.0658783	0.3289
ENSMUSG00000010045	Tmem115	572.765	580.805	590.256	504.691	442.381	597.304	554.828	567.703	551.342	-0.0470045	0.0923591	-0.508932	0.6108	0.858352
ENSMUSG00000010047	Hyal2	617.983	710.087	711.529	638.344	593.848	557.86	579.752	576.384	623.223	-0.196958	0.0784078	-2.51197	0.0120059	0.133387
ENSMUSG00000010048	Ifrd2	51.2474	62.7115	63.4786	52.8628	52.8933	39.4446	42.2623	58.1592	52.8825	-0.151367	0.136795	-1.10653	0.268499	NA
ENSMUSG00000010051	Hyal1	124.602	115.775	118.43	157.591	108.191	119.273	104.03	82.4645	116.295	-0.230378	0.125286	-1.83882	0.0659419	0.328942
ENSMUSG00000010054	Tusc2	185.897	215.149	190.436	176.542	188.733	215.067	201.559	217.012	198.799	0.0839586	0.104945	0.800026	0.423695	0.745496
ENSMUSG00000010057	Nprl2	144.699	173.663	143.064	143.627	146.659	142.752	131.122	123.263	143.606	-0.123084	0.114512	-1.07486	0.282439	0.644307
ENSMUSG00000010067	Rassf1	799.861	856.735	918.071	735.093	797.006	798.284	907.014	801.208	826.659	-0.00317722	0.0819418	-0.0387742	0.96907	0.991921
ENSMUSG00000010095	Slc3a2	4904.68	5527.29	5239.35	4696.81	4696.69	5229.23	4884.01	5162.28	5042.54	-0.0263853	0.066011	-0.399711	0.689369	0.895683
ENSMUSG00000010097	Nxf1	1428.9	1382.55	1328.31	1290.65	1334.35	1310.13	1212.6	1248.25	1316.97	-0.08397	0.0662611	-1.26726	0.205063	0.562065
ENSMUSG00000010110	Stx5a	695.357	683.073	669.842	682.23	673.188	679.95	675.113	694.438	681.649	-0.00325952	0.0703504	-0.0463327	0.963045	0.990661
ENSMUSG00000010142	Tnfrsf13b	589.848	675.355	659.42	597.45	656.358	682.768	601.425	624.994	635.952	0.0221446	0.0797735	0.277594	0.781324	0.933471
ENSMUSG00000010277	2610507B11Rik	2632.71	2493.99	2545.78	3639.56	3456.1	3798.89	4081.02	4200.48	3356.07	0.39469	0.0960544	4.10903	3.97324e-05	0.00354209
ENSMUSG00000010290	AI597479	113.548	129.282	126.957	119.689	112.999	109.881	133.289	116.318	120.246	-0.0404205	0.117595	-0.343728	0.731051	0.913651
ENSMUSG00000010307	Tmem86a	2993.45	3327.57	2773.16	2753.86	2750.45	2662.51	2520.57	2790.77	2821.54	-0.133589	0.0710314	-1.88071	0.0600115	0.315235
ENSMUSG00000010358	Ifi35	289.397	306.804	306.971	259.327	236.818	246.999	256.825	279.511	272.831	-0.159386	0.0977077	-1.63126	0.102836	0.409898
ENSMUSG00000010362	Rdm1	135.655	143.754	135.484	107.721	170.701	111.76	113.783	123.263	130.265	-0.0111119	0.124901	-0.088966	0.929109	0.980589
ENSMUSG00000010376	Nedd8	909.39	802.707	889.648	777.982	1057.87	909.105	886.425	882.804	889.491	0.129563	0.0813564	1.59253	0.111266	0.428685
ENSMUSG00000010392	Gosr1	486.348	512.305	424.454	406.944	405.115	432.952	447.547	434.892	443.82	-0.0776934	0.090182	-0.861518	0.388953	0.721224
ENSMUSG00000010406	Mrpl52	157.762	146.648	150.643	138.64	227.201	207.554	156.045	195.311	172.476	0.317923	0.113864	2.79214	0.00523608	0.0822317
ENSMUSG00000010453	Kansl3	421.033	416.79	395.083	416.918	409.923	418.864	415.038	497.391	423.88	0.0716625	0.0880939	0.813478	0.415944	0.739689
ENSMUSG00000010461	Eya4	262.266	184.275	246.335	215.441	167.095	167.17	235.152	225.692	212.928	-0.144414	0.118764	-1.21598	0.223994	0.585929
ENSMUSG00000010517	Faf1	704.401	785.341	683.106	702.178	670.784	795.467	740.132	787.319	733.591	0.0549243	0.0798919	0.687482	0.491779	0.792862
ENSMUSG00000010538	Tsacc	16.0776	18.3311	9.47442	9.97412	12.0212	7.51326	11.9201	11.2846	12.0746	-0.088388	0.122208	-0.723261	0.46952	NA
ENSMUSG00000010554	Mettl16	223.077	201.642	200.858	203.472	192.339	165.292	221.064	186.63	199.297	-0.0966593	0.106996	-0.903392	0.366318	0.704441
ENSMUSG00000010607	Pigyl	157.762	149.543	115.588	130.661	159.882	138.056	128.954	113.714	136.77	-0.0290035	0.12115	-0.239402	0.810794	0.945198
ENSMUSG00000010608	Rbm25	1056.1	926.2	1058.29	942.555	1056.66	1009.59	986.12	1047.73	1010.41	0.0386464	0.0722407	0.534968	0.592672	0.848334
ENSMUSG00000010609	Psen2	200.97	207.43	226.439	230.402	207.967	212.25	221.064	161.457	208.497	-0.0910933	0.108848	-0.836883	0.402659	0.732329
ENSMUSG00000010660	Plcd1	277.339	299.086	226.439	205.467	264.467	277.052	211.312	230.901	249.008	-0.0283561	0.113377	-0.250105	0.802506	0.942451
ENSMUSG00000010663	Fads1	755.648	851.911	775.008	891.687	696.028	896.896	739.049	814.229	802.557	-0.0494	0.0868279	-0.568941	0.569396	0.835613
ENSMUSG00000010721	Lmbr1	83.4026	87.7961	89.0596	87.7723	94.9676	108.942	86.6919	87.6728	90.7881	0.0868691	0.124918	0.695409	0.486799	0.790162
ENSMUSG00000010751	Tnfrsf22	59.2862	34.7325	52.1093	40.8939	63.7124	42.2621	61.768	33.8539	48.5773	0.0486864	0.139063	0.350104	0.726261	NA
ENSMUSG00000010755	Cars	382.848	387.846	365.713	321.167	335.392	330.584	353.27	395.83	359.081	-0.0354751	0.0940066	-0.377369	0.7059	0.901934
ENSMUSG00000010830	Kdelr3	13.0631	9.64792	9.47442	28.925	9.61697	19.7223	23.8403	6.07633	15.0458	-0.0101949	0.115845	-0.0880052	0.929873	NA
ENSMUSG00000010911	Apip	174.844	185.24	170.54	151.607	200.754	150.265	172.3	176.214	172.72	0.025535	0.111569	0.228873	0.818968	0.947961
ENSMUSG00000010914	Pdhx	286.383	238.304	244.44	224.418	245.233	250.755	285	259.546	254.26	0.0565389	0.101191	0.558735	0.576343	0.841205
ENSMUSG00000010936	Vac14	1222.9	1295.72	1232.62	1159.99	1125.19	1341.12	1195.26	1226.55	1224.92	-0.00527947	0.0719946	-0.0733315	0.941542	0.984857
ENSMUSG00000011008	Mcoln2	205.994	213.219	280.443	279.275	183.925	186.892	206.977	186.63	217.919	-0.286161	0.111183	-2.57378	0.0100595	0.120341
ENSMUSG00000011096	Akt1s1	191.927	226.726	198.963	187.513	218.786	211.311	172.3	210.068	202.199	0.0107938	0.107243	0.100648	0.91983	0.978569
ENSMUSG00000011114	Tbrg1	298.441	341.536	390.346	311.193	288.509	384.116	383.612	322.914	340.083	0.0337174	0.104759	0.321856	0.747562	0.919377
ENSMUSG00000011148	Adssl1	1352.53	1142.31	1151.14	1172.96	1125.19	1010.53	981.786	1010.41	1118.36	-0.205699	0.0762043	-2.69932	0.0069482	0.0962485
ENSMUSG00000011158	Brf1	399.931	399.424	358.133	352.087	352.221	358.758	312.091	374.997	363.455	-0.0953559	0.0914332	-1.0429	0.296994	0.660605
ENSMUSG00000011179	Odc1	317.533	365.656	386.556	367.048	435.168	433.891	399.866	382.809	386.066	0.175378	0.090433	1.93932	0.0524627	0.291996
ENSMUSG00000011254	Thg1l	24.1164	21.2254	20.8437	17.9534	36.0636	22.5398	19.5057	32.1178	24.2957	0.156625	0.136583	1.14674	0.251489	NA
ENSMUSG00000011256	Adam19	619.993	533.53	522.041	630.365	655.156	751.326	759.638	773.43	655.685	0.314603	0.0859804	3.65901	0.000253193	0.0119359
ENSMUSG00000011257	Pabpc4	17.0825	33.7677	19.8963	22.9405	26.4467	28.1747	24.9239	29.5136	25.3432	0.0922085	0.137128	0.672429	0.501311	NA
ENSMUSG00000011267	Zfp296	49.2377	40.5213	36.0028	21.9431	46.8827	38.5055	43.346	40.7982	39.6547	0.0970301	0.139076	0.697676	0.48538	NA
ENSMUSG00000011306	Sugp1	273.32	281.719	235.913	257.332	230.807	250.755	238.403	255.206	252.932	-0.086942	0.0978197	-0.888798	0.374112	0.709783
ENSMUSG00000011382	Dhdh	61.2959	56.9227	51.1619	50.868	73.3294	60.1061	36.8441	39.0621	53.6988	-0.0443752	0.138528	-0.320334	0.748715	NA
ENSMUSG00000011427	Zfp790	139.674	123.493	76.7428	135.648	105.787	107.064	75.8554	106.77	108.879	-0.171355	0.13245	-1.29373	0.195757	0.550811
ENSMUSG00000011658	Fuz	21.1019	26.0494	22.7386	22.9405	34.8615	25.3573	29.2585	25.1734	25.9351	0.130312	0.13818	0.943062	0.345649	NA
ENSMUSG00000011752	Pgam1	1788.63	1643.04	1766.03	1857.18	2049.62	1682.03	1771.77	1564.22	1765.32	0.00115182	0.0795832	0.0144731	0.988453	0.996579
ENSMUSG00000011831	Evi5	982.744	966.722	958.811	892.684	950.878	971.089	931.938	954.852	951.215	0.00297822	0.0671895	0.0443257	0.964645	0.990818
ENSMUSG00000011832	Evi5l	145.703	271.107	156.328	184.521	150.265	231.972	221.064	261.282	202.78	0.129275	0.131237	0.985046	0.324602	0.678605
ENSMUSG00000011837	Snapc2	120.582	159.191	119.378	125.674	181.52	113.638	136.54	113.714	133.78	0.0329988	0.126996	0.259841	0.794986	0.938305
ENSMUSG00000011877	Git1	175.849	231.55	228.334	356.076	449.593	239.485	347.851	293.4	290.267	0.205025	0.139025	1.47474	0.140283	0.479722
ENSMUSG00000011884	Gltp	5395.05	5551.41	5072.6	4895.3	4886.62	5217.02	5384.65	5128.43	5191.39	-0.0195254	0.0609364	-0.320423	0.748648	0.919496
ENSMUSG00000011958	Bnip2	2798.51	2730.36	2856.54	2836.64	2936.78	2667.21	2841.33	2759.52	2803.36	-0.0026849	0.0570368	-0.0470731	0.962455	0.99061
ENSMUSG00000011960	Ccnt1	400.936	366.621	381.819	447.838	353.424	423.56	356.52	387.149	389.733	-0.0593027	0.0929859	-0.63776	0.52363	0.810863
ENSMUSG00000012017	Scarf2	5.02426	21.2254	16.1065	16.956	9.61697	14.0874	11.9201	16.4929	13.9287	-0.0457831	0.121762	-0.376004	0.706914	NA
ENSMUSG00000012076	Brms1l	190.922	225.761	180.014	178.537	176.712	172.805	192.889	192.707	188.793	-0.0620546	0.108049	-0.57432	0.565751	0.833446
ENSMUSG00000012114	Med15	1318.36	1228.18	1230.73	1315.59	1170.87	1392.77	1277.62	1338.53	1284.08	0.0241933	0.0710837	0.34035	0.733593	0.914604
ENSMUSG00000012117	Dhdds	252.218	300.05	270.968	241.374	284.903	294.896	275.247	267.359	273.377	0.0644071	0.0974735	0.660766	0.508763	0.801557
ENSMUSG00000012126	Ubxn11	12.0582	17.3663	11.3693	24.9353	15.6276	24.4181	27.0912	21.7012	19.3209	0.149501	0.131738	1.13483	0.256446	NA
ENSMUSG00000012296	Tjap1	111.538	111.916	74.8479	98.7438	81.7442	103.307	86.6919	118.923	98.464	-0.0100234	0.13013	-0.0770263	0.938603	0.983983
ENSMUSG00000012405	Rpl15	429.071	434.156	488.88	416.918	546.965	446.1	413.954	451.385	453.429	0.0596122	0.0934235	0.638086	0.523418	0.810863
ENSMUSG00000012422	Tmem167	709.425	501.692	655.63	564.535	782.581	637.688	603.592	539.926	624.384	0.0614873	0.105579	0.582384	0.560308	0.83155
ENSMUSG00000012428	Steap4	43.2086	72.3594	78.6377	122.682	44.4785	64.8019	85.6083	26.9095	67.3357	-0.216505	0.137235	-1.57762	0.114653	0.4352
ENSMUSG00000012429	Mplkip	143.694	102.268	112.746	114.702	129.829	109.881	117.034	115.45	118.201	-0.00429909	0.121353	-0.0354264	0.97174	0.99262
ENSMUSG00000012443	Kif11	92.4463	180.416	128.852	131.658	204.361	206.615	164.715	205.727	164.349	0.390775	0.126244	3.09539	0.00196554	0.0449181
ENSMUSG00000012483	Rpa3	71.3444	71.3946	79.5851	88.7697	110.595	61.9844	69.3535	72.048	78.1344	0.00220844	0.134309	0.016443	0.986881	0.99651
ENSMUSG00000012519	Mlkl	137.665	95.5144	128.852	122.682	120.212	121.151	113.783	136.283	122.018	0.017262	0.121426	0.142161	0.886953	0.969429
ENSMUSG00000012535	Tnpo3	769.716	818.144	804.378	774.989	721.273	724.091	781.311	710.063	762.996	-0.102032	0.071309	-1.43085	0.152474	0.498388
ENSMUSG00000012609	Ttll5	78.3784	91.6553	93.7968	78.7956	58.9039	88.2808	93.1938	82.4645	83.1836	-0.0545033	0.130444	-0.417829	0.676072	0.890301
ENSMUSG00000012640	Zfp715	409.979	442.84	388.451	328.149	296.924	353.123	394.448	315.101	366.127	-0.173088	0.102935	-1.68152	0.0926614	0.388419
ENSMUSG00000012819	Cdh23	23.1116	14.4719	21.7912	31.9172	21.6382	42.2621	14.0874	17.361	23.3301	0.0228132	0.130228	0.175179	0.860939	NA
ENSMUSG00000012848	Rps5	801.871	778.587	929.441	819.873	1008.58	876.234	895.094	903.638	876.665	0.131646	0.0784272	1.67857	0.0932361	0.390101
ENSMUSG00000013033	Adgrl1	7.03396	18.3311	9.47442	16.956	14.4255	27.2356	7.58554	14.7568	14.4749	0.0776015	0.119912	0.647153	0.517533	NA
ENSMUSG00000013076	Amotl1	164.796	153.402	126.01	143.627	116.606	165.292	141.958	177.082	148.596	0.0298424	0.120867	0.246903	0.804983	0.943268
ENSMUSG00000013089	Etv5	1056.1	1014	1097.14	998.41	870.336	1080.97	1012.13	941.832	1008.86	-0.0843789	0.0771847	-1.09321	0.274303	0.638002
ENSMUSG00000013150	Gfod2	23.1116	16.4015	19.8963	30.9198	34.8615	15.0265	11.9201	16.4929	21.0788	-0.0721126	0.130295	-0.553456	0.579951	NA
ENSMUSG00000013155	Enkd1	39.1892	32.8029	35.0554	25.9327	39.67	28.1747	20.5893	42.5343	32.9936	-0.00875271	0.138461	-0.0632142	0.949596	NA
ENSMUSG00000013160	Atp6v0d1	1115.38	1260.02	1229.78	1341.52	1395.66	1276.32	1296.04	1212.66	1265.92	0.0604718	0.0740478	0.816659	0.414123	0.738808
ENSMUSG00000013236	Ptprs	258.247	362.762	320.235	453.823	437.572	504.328	520.151	599.821	432.117	0.440272	0.115432	3.81413	0.000136666	0.00769088
ENSMUSG00000013275	Slc41a1	177.859	194.888	176.224	224.418	168.297	228.215	192.889	195.311	194.763	0.020018	0.111608	0.179361	0.857654	0.963848
ENSMUSG00000013419	Zfp651	35.1698	37.6269	27.4758	37.9017	30.053	48.8362	54.1824	65.9716	42.1522	0.268145	0.139077	1.92804	0.0538501	NA
ENSMUSG00000013465	Nelfb	622.003	664.742	575.097	548.577	526.529	560.677	563.497	583.328	580.556	-0.0978362	0.0823871	-1.18752	0.235023	0.594925
ENSMUSG00000013495	Tmem175	432.086	456.347	506.882	423.9	461.614	434.83	403.117	375.865	436.83	-0.106803	0.0909723	-1.17402	0.240388	0.599905
ENSMUSG00000013539	Tango2	384.858	406.178	348.659	380.014	397.902	329.644	320.76	367.184	366.9	-0.0904056	0.0930835	-0.971232	0.331433	0.683006
ENSMUSG00000013593	Ndufs2	1161.61	1283.17	1109.45	1116.1	1279.06	1192.73	1205.02	1188.36	1191.94	0.0542008	0.0701141	0.773037	0.4395	0.756305
ENSMUSG00000013622	Atraid	1465.07	1356.5	1292.31	1306.61	1601.23	1390.89	1565.87	1427.07	1425.69	0.13172	0.0716986	1.83714	0.0661896	0.32963
ENSMUSG00000013629	Cad	92.4463	98.4088	85.2698	124.677	103.382	147.448	152.794	140.624	118.131	0.315735	0.126525	2.49544	0.0125801	0.136843
ENSMUSG00000013646	Sh3bp5l	239.155	242.163	235.913	216.438	167.095	241.364	189.639	222.22	219.248	-0.14627	0.109118	-1.34047	0.180092	0.531155
ENSMUSG00000013662	Atad1	887.284	820.073	833.749	753.046	685.209	723.152	756.387	690.966	768.733	-0.18933	0.0760426	-2.48979	0.0127817	0.13813
ENSMUSG00000013663	Pten	1342.48	1224.32	1401.27	1633.76	1388.45	1415.31	1413.08	1530.37	1418.63	0.0340363	0.0814714	0.41777	0.676115	0.890301
ENSMUSG00000013698	Pea15a	1915.25	2473.73	1991.52	2054.67	2121.74	2020.13	1964.66	1924.46	2058.27	-0.0651083	0.0783145	-0.83137	0.405765	0.733783
ENSMUSG00000013701	Timm23	429.071	455.382	498.355	403.952	468.827	452.674	525.57	499.995	466.728	0.109308	0.0884462	1.23588	0.216505	0.577347
ENSMUSG00000013707	Tnfaip8l2	1147.54	1149.07	1089.56	1019.36	1051.86	1066.88	990.455	958.325	1059.13	-0.107617	0.0712081	-1.5113	0.130712	0.463408
ENSMUSG00000013736	Trnt1	481.324	382.058	489.828	427.89	441.178	386.933	412.87	470.482	436.57	-0.0495002	0.0949295	-0.521442	0.602059	0.853363
ENSMUSG00000013787	Ehmt2	383.853	401.354	342.027	348.097	340.2	374.724	376.026	434.892	375.147	0.0450447	0.094609	0.476114	0.633993	0.871522
ENSMUSG00000013822	Elof1	231.116	238.304	229.281	231.4	301.732	305.226	273.08	248.262	257.3	0.235728	0.0985006	2.39316	0.016704	0.160003
ENSMUSG00000013833	Med16	498.406	716.841	607.31	526.634	560.188	684.646	644.771	717.875	619.584	0.128115	0.101075	1.26752	0.20497	0.562065
ENSMUSG00000013846	St3gal1	235.135	277.86	248.23	249.353	213.978	288.321	245.988	226.56	248.178	-0.0413314	0.104773	-0.394486	0.693222	0.896896
ENSMUSG00000013858	Tmem259	122.592	147.613	148.748	150.609	163.488	159.657	140.874	161.457	149.38	0.107158	0.11274	0.950489	0.341864	0.689897
ENSMUSG00000013878	Rnf170	234.13	196.818	196.121	221.426	218.786	196.284	174.467	187.498	203.191	-0.105529	0.106473	-0.991129	0.321623	0.675754
ENSMUSG00000013928	Thap8	10.0485	5.78875	5.68465	3.98965	9.61697	7.51326	5.41824	7.81243	6.98406	0.0439495	0.106013	0.414569	0.678457	NA
ENSMUSG00000013973	Dedd	59.2862	60.7819	50.2144	60.8421	51.6912	51.6537	41.1787	60.7633	54.5514	-0.0998578	0.135873	-0.734936	0.462378	0.77226
ENSMUSG00000013997	Nit1	113.548	144.719	123.167	159.586	128.627	138.995	136.54	124.999	133.773	-0.0243887	0.118708	-0.205452	0.837219	0.955064
ENSMUSG00000014039	Prdm15	67.325	36.6621	48.3195	45.881	56.4997	62.9236	59.6007	46.8746	53.0108	0.106282	0.137867	0.770902	0.440765	NA
ENSMUSG00000014074	Rnf168	171.83	203.571	257.704	200.48	248.839	156.839	204.81	225.692	208.721	0.00065524	0.120954	0.00541725	0.995678	0.998683
ENSMUSG00000014075	Tctex1d2	123.597	85.8665	113.693	125.674	155.074	140.874	124.62	89.4089	119.851	0.120852	0.130188	0.928292	0.353256	0.697526
ENSMUSG00000014077	Chp1	1196.78	1054.52	1184.3	1170.96	1108.36	1223.72	1044.64	1000.86	1123.02	-0.0674114	0.0773282	-0.871757	0.383341	0.717588
ENSMUSG00000014158	Trpv4	800.866	683.073	655.63	679.238	620.294	761.657	736.881	615.446	694.136	-0.0382211	0.0899039	-0.425133	0.67074	0.888215
ENSMUSG00000014177	Tvp23b	271.31	248.916	275.706	298.226	272.881	235.729	224.315	187.498	251.823	-0.208418	0.10716	-1.94492	0.0517845	0.291026
ENSMUSG00000014195	Dnajc7	851.109	839.369	884.911	791.945	825.857	872.478	844.162	815.965	840.725	-0.00362379	0.0702872	-0.0515569	0.958882	0.989621
ENSMUSG00000014226	Cacybp	1232.95	1084.43	1262.94	1056.26	1224.96	1029.32	1143.25	1092	1140.76	-0.0435076	0.0796206	-0.546437	0.584766	0.844767
ENSMUSG00000014232	Cluap1	77.3735	81.0425	57.794	85.7775	61.3082	72.3152	75.8554	73.7841	73.1563	-0.0576647	0.131981	-0.436918	0.662171	0.885293
ENSMUSG00000014243	Zswim7	13.0631	27.979	43.5823	26.9301	56.4997	38.5055	57.4334	31.2497	36.9053	0.283651	0.136491	2.07817	0.0376938	NA
ENSMUSG00000014245	Pigl	42.2037	35.6973	39.7926	38.8991	51.6912	37.5663	39.0114	48.6107	41.684	0.095791	0.13833	0.692484	0.488633	NA
ENSMUSG00000014294	Ndufa2	676.265	659.918	614.89	568.525	1073.49	732.543	703.288	736.104	720.628	0.301118	0.104629	2.87795	0.00400273	0.0721183
ENSMUSG00000014301	Pam16	67.325	62.7115	63.4786	39.8965	100.978	74.1935	75.8554	71.1799	69.4523	0.280974	0.135368	2.07563	0.0379286	0.250715
ENSMUSG00000014303	Glis2	36.1746	37.6269	17.054	27.9275	26.4467	28.1747	22.7566	19.9651	27.0158	-0.117959	0.136756	-0.862551	0.388385	NA
ENSMUSG00000014313	Cox6c	1025.95	1007.24	1013.76	881.712	1412.49	1158.92	1083.65	1178.81	1095.32	0.267582	0.0841357	3.18036	0.00147095	0.0371283
ENSMUSG00000014329	Bicc1	8.03881	20.2606	28.4233	36.9043	14.4255	17.844	23.8403	23.4373	21.6467	-0.0705948	0.128222	-0.550568	0.58193	NA
ENSMUSG00000014349	Ube2z	296.431	356.008	264.336	333.136	367.849	364.393	355.437	361.976	337.446	0.183978	0.096651	1.90353	0.0569718	0.306943
ENSMUSG00000014353	Tmem87b	1006.86	954.179	956.916	1050.28	916.016	895.017	879.923	845.478	938.083	-0.155818	0.0692038	-2.25159	0.0243484	0.195799
ENSMUSG00000014355	Anapc1	513.479	533.53	480.353	625.377	573.412	519.354	509.315	676.209	553.879	0.0712585	0.0981744	0.725836	0.46794	0.776704
ENSMUSG00000014361	Mertk	1383.68	1413.42	1366.21	1519.06	1110.76	1165.49	1232.11	1262.14	1306.61	-0.234799	0.0688512	-3.41024	0.000649047	0.02242
ENSMUSG00000014402	Tsg101	1071.17	934.884	996.709	912.632	1115.57	946.671	996.957	884.541	982.392	0.00764768	0.0820305	0.0932297	0.925721	0.979686
ENSMUSG00000014418	Hps5	410.984	442.84	395.083	438.861	395.498	379.42	415.038	365.448	405.396	-0.106819	0.0859521	-1.24277	0.213952	0.574346
ENSMUSG00000014426	Map3k4	236.14	296.191	209.385	319.172	235.616	290.2	285	324.65	274.544	0.079451	0.115004	0.690853	0.489658	0.792023
ENSMUSG00000014444	Piezo1	451.178	420.649	365.713	666.271	650.347	823.641	735.798	950.512	633.014	0.555123	0.119195	4.65725	3.2046e-06	0.000779845
ENSMUSG00000014470	Rnf166	526.542	575.016	543.832	554.561	573.412	640.506	533.155	613.71	570.092	0.0938132	0.0813934	1.15259	0.249079	0.61025
ENSMUSG00000014496	Ankrd28	180.873	176.557	192.331	216.438	159.882	164.353	195.057	153.644	179.892	-0.151924	0.110445	-1.37556	0.168959	0.516928
ENSMUSG00000014498	Ankrd52	45.2183	33.7677	67.2684	51.8654	70.9251	42.2621	55.2661	65.1036	53.9596	0.124331	0.138745	0.896111	0.370194	0.70679
ENSMUSG00000014503	Pkd2l2	31.1504	41.4861	30.3181	34.9094	24.0424	33.8097	34.6768	33.8539	33.0308	-0.0582216	0.139062	-0.418674	0.675454	NA
ENSMUSG00000014504	Srp19	413.999	359.867	405.505	397.967	537.348	386.933	363.022	418.399	410.38	0.092217	0.102796	0.89709	0.369671	0.706392
ENSMUSG00000014547	Wdfy2	151.733	146.648	148.748	273.291	176.712	143.691	211.312	240.449	186.573	0.0654697	0.133318	0.491078	0.623371	0.865777
ENSMUSG00000014550	Rbsn	373.805	448.628	450.035	436.867	405.115	426.378	324.011	431.42	412.032	-0.0903641	0.0977037	-0.924878	0.355029	0.698271
ENSMUSG00000014551	Mrps25	185.897	191.029	170.54	170.557	228.403	182.197	171.217	161.457	182.662	0.0350563	0.112371	0.311969	0.755064	0.921968
ENSMUSG00000014554	Dguok	237.145	241.198	232.123	263.317	284.903	243.242	229.734	221.352	244.127	0.00347072	0.102051	0.0340096	0.972869	0.99262
ENSMUSG00000014592	Camta1	124.602	88.7609	106.114	101.736	119.01	141.813	121.369	109.374	114.097	0.163806	0.12317	1.32992	0.183545	0.536349
ENSMUSG00000014599	Csf1	47.228	50.1692	41.6875	40.8939	40.8721	47.8971	58.517	57.2911	48.0695	0.109953	0.137356	0.800495	0.423424	NA
ENSMUSG00000014601	Strip1	663.202	631.939	620.575	594.458	491.667	513.719	581.919	605.029	587.814	-0.173552	0.0843229	-2.05818	0.039573	0.254849
ENSMUSG00000014606	Slc25a11	1064.14	1127.84	1164.41	1043.29	1160.05	1126.05	1054.39	995.651	1091.98	-0.0206774	0.072891	-0.283676	0.776659	0.931604
ENSMUSG00000014633	Cmc2	114.553	116.74	128.852	99.7412	145.457	104.247	133.289	112.846	119.466	0.0742999	0.122587	0.606098	0.54445	0.823573
ENSMUSG00000014668	Chfr	316.528	350.22	279.495	348.097	301.732	348.428	277.414	325.518	318.429	-0.0372604	0.0996247	-0.374008	0.708399	0.903587
ENSMUSG00000014748	Tex261	1349.52	1166.43	1276.2	1145.03	1430.52	1410.62	1286.29	1262.14	1290.84	0.115998	0.0749446	1.54778	0.121675	0.44693
ENSMUSG00000014763	Fam120b	357.727	335.748	310.761	295.234	235.616	286.443	263.327	227.428	289.035	-0.303734	0.10034	-3.02704	0.00246962	0.0526048
ENSMUSG00000014767	Tbp	223.077	148.578	163.907	170.557	197.148	164.353	177.718	146.7	174.005	-0.0347245	0.119004	-0.291791	0.770446	0.928587
ENSMUSG00000014769	Psmb1	1359.56	1296.68	1298.94	1342.52	1716.63	1362.72	1488.93	1450.51	1414.56	0.168469	0.0746133	2.2579	0.0239521	0.194118
ENSMUSG00000014778	Fhod1	58.2814	56.9227	50.2144	61.8396	57.7018	52.5928	52.0151	66.8397	57.0509	0.0101175	0.134749	0.075084	0.940148	0.984456
ENSMUSG00000014786	Slc9a5	6.02911	20.2606	11.3693	17.9534	25.2445	20.6615	9.75284	21.7012	16.6216	0.131217	0.124501	1.05394	0.291908	NA
ENSMUSG00000014837	4931428F04Rik	17.0825	4.82396	13.2642	10.9715	24.0424	17.844	13.0038	24.3053	15.6672	0.219551	0.125401	1.7508	0.0799804	NA
ENSMUSG00000014846	Tppp3	4024.43	4742.92	4937.12	3513.88	6062.3	4230.91	4221.9	4704.82	4554.78	0.132918	0.102073	1.30218	0.192856	0.547879
ENSMUSG00000014850	Msh3	130.631	92.62	115.588	117.695	94.9676	107.064	104.03	124.131	110.841	-0.0578521	0.123871	-0.467034	0.640475	0.873759
ENSMUSG00000014856	Tmem208	316.528	318.381	361.923	287.255	430.359	344.671	379.277	338.539	347.117	0.181578	0.0986861	1.83995	0.0657754	0.328697
ENSMUSG00000014859	E2f4	247.193	248.916	256.757	257.332	262.062	303.348	253.574	275.171	263.044	0.101267	0.0960569	1.05424	0.291772	0.65392
ENSMUSG00000014867	Surf4	2184.55	2486.27	2154.48	2122.49	2190.26	2515.06	2317.92	2239.56	2276.33	0.0466995	0.0707421	0.660137	0.509166	0.801912
ENSMUSG00000014873	Surf2	269.3	254.705	240.65	241.374	224.797	250.755	236.235	259.546	247.17	-0.0403088	0.0975882	-0.41305	0.67957	0.891658
ENSMUSG00000014905	Dnajb9	343.659	300.05	331.605	377.022	337.796	323.07	371.692	324.65	338.693	0.00359714	0.0943908	0.0381091	0.969601	0.991954
ENSMUSG00000014907	Naf1	21.1019	11.5775	22.7386	27.9275	12.0212	15.0265	15.1711	19.9651	18.1912	-0.134924	0.130805	-1.03149	0.302312	NA
ENSMUSG00000014956	Ppp1cb	873.216	754.467	956.916	982.451	1042.24	854.634	1021.88	856.763	917.821	0.0704596	0.091184	0.772718	0.439689	0.756393
ENSMUSG00000014959	Gorasp2	1217.88	1259.05	1206.09	1074.21	1230.97	1250.96	1263.53	1263.88	1220.82	0.0697402	0.0684344	1.01908	0.308164	0.668927
ENSMUSG00000014980	Tsen15	81.3929	70.4298	95.6916	85.7775	93.7654	83.585	94.2775	72.916	84.7295	0.0286131	0.128759	0.222222	0.824141	0.948523
ENSMUSG00000015002	Efr3a	1604.75	1587.08	1643.81	1543.99	1670.95	1605.02	1665.57	1520.82	1605.25	0.0166345	0.0622174	0.267361	0.789191	0.935932
ENSMUSG00000015013	Trappc2l	294.421	278.825	285.18	259.327	371.455	216.006	313.175	240.449	282.355	0.0183393	0.117115	0.156591	0.875567	0.967189
ENSMUSG00000015016	Acsf3	23.1116	22.1902	16.1065	27.9275	18.0318	25.3573	14.0874	22.5692	21.1727	-0.0546011	0.134648	-0.405511	0.685102	NA
ENSMUSG00000015023	Ddx19a	41.1989	67.5355	55.8991	62.837	69.723	64.8019	88.8592	68.5758	64.9288	0.218898	0.135372	1.61701	0.105875	0.415314
ENSMUSG00000015027	Galns	490.367	431.262	437.718	462.799	490.465	545.651	476.806	513.016	481.011	0.139391	0.0834598	1.67016	0.0948874	0.39408
ENSMUSG00000015053	Gata2	2.0097	2.89438	1.89488	10.9715	3.60636	2.81747	4.3346	4.34024	4.10865	-0.0229528	0.0834319	-0.275108	0.783233	NA
ENSMUSG00000015083	C8g	3.01455	6.75355	11.3693	11.9689	12.0212	12.2091	7.58554	11.2846	9.52585	0.0791051	0.11301	0.699985	0.483937	NA
ENSMUSG00000015085	Entpd2	17.0825	14.4719	5.68465	35.9068	3.60636	14.0874	6.50189	11.2846	13.5783	-0.19782	0.111056	-1.78127	0.0748686	NA
ENSMUSG00000015087	Rabl6	324.567	358.903	290.865	323.162	298.126	344.671	330.513	350.691	327.687	0.0279155	0.0945186	0.295344	0.767731	0.927002
ENSMUSG00000015092	Edf1	994.803	984.088	1031.76	898.668	1217.75	1058.43	978.535	1063.36	1028.42	0.129943	0.0784101	1.65722	0.0974756	0.399599
ENSMUSG00000015094	Npdc1	15.0728	11.5775	27.4758	35.9068	19.2339	21.6006	27.0912	13.8888	21.4809	-0.0456069	0.129457	-0.352293	0.724618	NA
ENSMUSG00000015095	Fbxw5	433.091	457.311	386.556	393.978	403.913	515.598	410.703	449.649	431.35	0.0813412	0.0942406	0.863123	0.38807	0.720585
ENSMUSG00000015112	Slc25a13	223.077	190.064	173.382	147.617	169.499	154.022	145.209	218.748	177.702	-0.0669262	0.122595	-0.545914	0.585125	0.844847
ENSMUSG00000015120	Ube2i	1979.56	1759.78	1818.14	1782.38	2019.56	1945.94	1820.53	1795.99	1865.23	0.0434801	0.0668939	0.649986	0.515701	0.806473
ENSMUSG00000015126	Tsr3	91.4415	95.5144	97.5865	61.8396	96.1697	101.429	76.9391	81.5965	87.8145	0.025473	0.131184	0.194178	0.846037	0.958927
ENSMUSG00000015127	Unkl	76.3687	76.2186	83.3749	88.7697	85.3506	63.8627	57.4334	61.6314	74.1262	-0.187435	0.131476	-1.42562	0.153977	0.499228
ENSMUSG00000015133	Lrrk1	755.648	677.284	504.987	819.873	842.687	876.234	915.683	1130.2	815.324	0.365973	0.108599	3.36995	0.000751821	0.0245
ENSMUSG00000015143	Actn1	142.689	110.951	137.379	116.697	110.595	150.265	114.867	149.304	129.093	0.0408757	0.122611	0.333376	0.738851	0.917155
ENSMUSG00000015149	Sirt2	2350.35	2235.42	2153.54	1975.87	2006.34	1911.19	1978.74	2006.93	2077.3	-0.132681	0.0662289	-2.00338	0.045137	0.273099
ENSMUSG00000015165	Hnrnpl	576.785	478.537	523.935	593.46	562.593	634.871	616.596	611.974	574.844	0.144004	0.0849543	1.69507	0.0900615	0.382868
ENSMUSG00000015176	Nolc1	515.489	538.354	533.41	434.872	473.636	571.947	551.577	633.675	531.62	0.125095	0.0944995	1.32377	0.185581	0.538034
ENSMUSG00000015189	Casd1	332.606	329.959	414.032	415.921	328.179	297.713	341.349	278.643	342.3	-0.222151	0.101275	-2.19354	0.0282682	0.212425
ENSMUSG00000015202	Cnksr3	70.3396	64.6411	68.2158	74.8059	64.9145	61.9844	81.2737	51.2148	67.1737	-0.0681702	0.133506	-0.510615	0.609621	0.857691
ENSMUSG00000015214	Mtmr1	333.611	373.375	349.606	400.96	370.253	287.382	378.193	334.198	353.447	-0.078792	0.0984752	-0.800121	0.423641	0.745496
ENSMUSG00000015217	Hmgb3	87.422	107.092	88.1121	104.728	143.052	110.821	121.369	99.8255	107.803	0.206523	0.124951	1.65284	0.0983636	0.401026
ENSMUSG00000015243	Abca1	2313.17	2330.94	3077.29	3840.04	3231.3	2913.27	3534.86	4466.97	3213.48	0.174879	0.13623	1.2837	0.199246	0.555678
ENSMUSG00000015247	Nipsnap3b	889.293	826.827	973.023	882.71	895.58	831.155	879.923	841.138	877.456	-0.0482285	0.0734343	-0.656757	0.511337	0.803617
ENSMUSG00000015289	Lage3	154.747	171.733	126.01	136.645	167.095	163.413	126.787	144.096	148.816	0.0221215	0.118398	0.18684	0.851786	0.961088
ENSMUSG00000015290	Ubl4a	618.988	626.15	652.788	532.618	694.826	626.418	698.954	652.772	637.939	0.122453	0.0821686	1.49026	0.136156	0.472427
ENSMUSG00000015291	Gdi1	1010.88	853.841	740.9	896.674	764.549	860.269	852.832	806.416	848.295	-0.0817051	0.0872501	-0.936447	0.349043	0.695303
ENSMUSG00000015305	Sash1	299.446	216.113	234.018	274.288	215.18	217.885	195.057	227.428	234.927	-0.209349	0.107819	-1.94167	0.0521773	0.291095
ENSMUSG00000015312	Gadd45b	1338.46	1697.07	1643.81	1380.42	1735.86	1359.9	1496.52	1501.72	1519.22	0.00623452	0.0878746	0.0709479	0.943439	0.985128
ENSMUSG00000015314	Slamf6	98.4754	103.233	70.1107	79.793	85.3506	81.7067	78.0227	76.3882	84.135	-0.0890886	0.129502	-0.687931	0.491496	0.792804
ENSMUSG00000015316	Slamf1	2.0097	7.71834	7.57954	4.98706	7.21273	0.939158	3.25095	3.47219	4.64621	-0.068126	0.0875784	-0.777886	0.436636	NA
ENSMUSG00000015335	Zdhhc12	69.3347	82.0073	54.9516	77.7982	70.9251	85.4634	78.0227	59.8953	72.2998	0.0320411	0.133523	0.239966	0.810357	0.945198
ENSMUSG00000015337	Endog	46.2232	54.9932	39.7926	42.8887	48.0848	61.0453	69.3535	46.8746	51.157	0.168119	0.137479	1.22287	0.221378	NA
ENSMUSG00000015340	Cybb	5325.71	5879.44	5513.17	4978.08	5158.3	5496.89	5523.36	5530.33	5425.66	0.000904241	0.0628577	0.0143855	0.988522	0.996579
ENSMUSG00000015341	Golga7	1434.93	1205.99	1369.05	1317.58	1425.72	1226.54	1296.04	1197.04	1309.11	-0.0473042	0.076481	-0.61851	0.536239	0.818217
ENSMUSG00000015354	Pcolce2	100.485	102.268	72.953	149.612	98.5739	119.273	117.034	111.11	108.914	0.0470479	0.132172	0.355959	0.721871	0.910562
ENSMUSG00000015355	Cd48	2032.81	1819.6	2074.9	1866.16	1972.68	1642.59	1832.45	1513.88	1844.38	-0.148793	0.0812084	-1.83224	0.066916	0.33233
ENSMUSG00000015357	Clpx	470.27	535.46	499.302	515.662	564.997	469.579	502.813	508.676	508.345	0.0141593	0.0840144	0.168534	0.866163	0.965485
ENSMUSG00000015363	Trabd	435.101	458.276	478.458	391.983	378.668	416.047	379.277	387.149	415.62	-0.155674	0.0881247	-1.76652	0.0773093	0.354168
ENSMUSG00000015377	Dennd6b	25.1213	19.2958	12.3167	18.9508	27.6488	17.844	16.2547	19.097	19.5662	0.0312474	0.132933	0.235062	0.814161	NA
ENSMUSG00000015396	Cd83	21383.2	25097.1	22895.9	21389.5	22077	21265.4	25111.4	21406.1	22578.2	-0.0135149	0.0709322	-0.190533	0.848892	0.959867
ENSMUSG00000015461	Atf6b	757.658	730.348	715.319	764.018	723.677	793.588	766.14	907.978	769.841	0.0977397	0.0802211	1.21838	0.22308	0.585929
ENSMUSG00000015468	Notch4	14.0679	8.68313	2.84233	3.98965	13.2233	9.39158	7.58554	4.34024	8.01546	0.0339653	0.102648	0.330891	0.740727	NA
ENSMUSG00000015474	Ppt2	111.538	118.669	109.903	109.715	131.031	113.638	84.5246	151.908	116.366	0.070473	0.127489	0.552777	0.580416	0.842914
ENSMUSG00000015478	Rnf5	399.931	471.783	467.089	360.066	351.019	385.994	335.931	329.858	387.709	-0.236914	0.0976593	-2.42592	0.0152696	0.152088
ENSMUSG00000015488	Cacfd1	158.766	187.17	169.592	185.519	188.733	215.067	215.646	151.908	184.05	0.106078	0.114309	0.927997	0.353409	0.697636
ENSMUSG00000015501	Hivep2	203.985	160.156	174.329	239.379	131.031	164.353	213.479	230.033	189.593	-0.0486992	0.126844	-0.38393	0.701031	0.899797
ENSMUSG00000015522	Arnt	637.076	608.784	557.096	653.305	585.433	564.434	585.17	551.21	592.813	-0.0949368	0.0788768	-1.20361	0.228741	0.588643
ENSMUSG00000015536	Mocs2	710.43	618.432	641.418	629.367	751.326	654.593	624.182	601.557	653.913	0.0139574	0.0846219	0.164939	0.868992	0.965573
ENSMUSG00000015542	Nat9	140.679	129.282	123.167	131.658	138.244	165.292	134.372	167.533	141.279	0.165642	0.11511	1.43899	0.150153	0.495648
ENSMUSG00000015568	Lpl	2593.52	2528.72	3400.37	2146.43	3347.91	2330.05	2531.4	2604.14	2685.32	0.0155095	0.106004	0.14631	0.883676	0.969156
ENSMUSG00000015575	Atp6v0e	2172.49	2020.27	2331.65	1944.95	2389.82	2066.15	2224.73	1895.82	2130.74	0.015524	0.0793812	0.195563	0.844952	0.958494
ENSMUSG00000015597	Zfp318	107.519	109.022	120.325	131.658	106.989	102.368	81.2737	116.318	109.434	-0.145639	0.123695	-1.17741	0.239032	0.598647
ENSMUSG00000015605	Srf	89.4317	130.247	120.325	141.633	162.286	110.821	189.639	221.352	145.717	0.330466	0.132472	2.49462	0.0126093	0.136953
ENSMUSG00000015656	Hspa8	9709.88	10454.5	9960.46	8744.31	8361.95	9158.67	10269.7	9808.07	9558.45	-0.0442552	0.0733821	-0.603079	0.546456	0.824472
ENSMUSG00000015659	Serac1	91.4415	70.4298	55.8991	70.8163	82.9463	56.3495	80.19	64.2355	71.5385	-0.019033	0.134994	-0.140992	0.887876	0.96965
ENSMUSG00000015668	Pdzd11	286.383	279.79	309.814	248.356	314.956	231.033	270.912	270.831	276.509	-0.0431513	0.103582	-0.41659	0.676978	0.890376
ENSMUSG00000015671	Psma2	1601.73	1369.04	1457.17	1428.29	1788.76	1533.64	1485.68	1402.77	1508.39	0.0760806	0.0797679	0.953775	0.340198	0.688965
ENSMUSG00000015672	Mrpl32	199.965	153.402	167.697	188.511	241.626	170.927	203.726	171.873	187.216	0.112998	0.116339	0.971281	0.331409	0.683006
ENSMUSG00000015697	Setdb1	423.042	432.227	391.294	501.698	401.508	362.515	393.365	481.766	423.427	-0.0775547	0.0987042	-0.785729	0.432026	0.75136
ENSMUSG00000015702	Anxa9	26.1261	26.0494	23.6861	22.9405	27.6488	17.844	15.1711	7.81243	20.9098	-0.188219	0.132032	-1.42555	0.153998	NA
ENSMUSG00000015711	Prune	77.3735	93.5848	88.1121	109.715	94.9676	77.9501	94.2775	73.7841	88.7206	-0.082477	0.128795	-0.640373	0.52193	0.810279
ENSMUSG00000015714	Cers2	2739.22	2788.25	2848.01	2718.95	2467.95	2628.7	2727.54	2726.54	2705.65	-0.068684	0.0583927	-1.17624	0.239498	0.598647
ENSMUSG00000015733	Capza2	9495.84	8784.43	9998.36	8244.61	9009.9	8718.2	9271.7	8258.61	8972.71	-0.047725	0.0683176	-0.698575	0.484818	0.788796
ENSMUSG00000015745	Plekho1	551.663	603.96	583.624	617.398	684.007	691.22	689.201	715.271	642.043	0.220334	0.074207	2.96918	0.00298593	0.059676
ENSMUSG00000015747	Vps45	238.15	210.325	226.439	217.436	223.595	185.014	236.235	171.873	213.633	-0.108309	0.10888	-0.994752	0.319857	0.675181
ENSMUSG00000015748	Prpf3	254.227	325.135	336.342	246.361	256.052	245.12	274.163	306.421	280.478	-0.0833073	0.108685	-0.766499	0.44338	0.759366
ENSMUSG00000015749	Anp32e	935.516	982.158	906.702	860.767	1169.66	1014.29	1162.76	1171	1025.36	0.27045	0.0744539	3.63245	0.000280744	0.0127511
ENSMUSG00000015750	Aph1a	266.286	242.163	197.068	234.392	316.158	289.261	301.254	296.004	267.823	0.300255	0.100551	2.98611	0.00282552	0.0579521
ENSMUSG00000015755	Tab2	301.455	260.494	333.5	303.213	256.052	290.2	243.821	243.921	279.082	-0.179808	0.100547	-1.78831	0.0737262	0.345026
ENSMUSG00000015757	Ppil4	540.61	460.206	490.775	454.82	514.508	421.682	506.064	412.323	475.123	-0.0635851	0.0934243	-0.680605	0.496121	0.795278
ENSMUSG00000015759	Cnih1	530.561	531.6	607.31	625.377	759.74	657.41	642.604	596.349	618.869	0.184469	0.0888952	2.07513	0.0379742	0.250715
ENSMUSG00000015766	Eps8	2430.73	2435.14	2535.35	2641.15	2449.92	2295.3	2030.76	2036.44	2356.85	-0.175582	0.0717601	-2.44679	0.0144133	0.146807
ENSMUSG00000015776	Med22	485.343	632.904	492.67	525.636	460.412	554.103	545.075	602.425	537.321	0.0166858	0.0967767	0.172415	0.863111	0.965344
ENSMUSG00000015790	Surf1	243.174	227.691	206.542	225.415	232.009	243.242	260.076	264.755	237.863	0.127624	0.099181	1.28678	0.198172	0.553731
ENSMUSG00000015804	Med28	692.342	722.629	666.052	573.512	721.273	690.281	668.611	665.793	675.062	0.0432687	0.0821836	0.526488	0.598549	0.850858
ENSMUSG00000015806	Qdpr	458.212	539.319	423.507	468.784	534.944	490.24	474.638	444.44	479.261	0.0341831	0.0908623	0.376207	0.706763	0.902461
ENSMUSG00000015837	Sqstm1	7066.11	10827.9	8137.58	8202.72	8077.05	7754.63	7252.86	7723.89	8130.34	-0.133263	0.0917434	-1.45256	0.146345	0.487672
ENSMUSG00000015839	Nfe2l2	4051.56	4303.94	4156.43	3774.21	3409.22	3666.47	3883.8	3583.3	3853.61	-0.154187	0.0637858	-2.41726	0.0156378	0.154219
ENSMUSG00000015846	Rxra	267.29	218.043	201.805	321.167	401.508	229.155	306.673	256.074	275.214	0.170648	0.125882	1.35562	0.175219	0.526237
ENSMUSG00000015850	Adamtsl4	79.3832	81.0425	76.7428	101.736	104.585	89.22	75.8554	92.8811	87.6807	0.0666509	0.128431	0.518963	0.603786	0.853954
ENSMUSG00000015852	Fcrls	1325.4	1702.86	1784.03	1480.16	1061.47	1327.03	1423.91	1131.07	1404.49	-0.300065	0.0959211	-3.12825	0.00175853	0.0416678
ENSMUSG00000015869	Prpsap1	555.683	575.016	612.048	533.616	556.582	553.164	590.589	592.009	571.088	0.00930201	0.0784231	0.118613	0.905582	0.973716
ENSMUSG00000015880	Ncapg	55.2668	109.986	104.219	88.7697	119.01	123.969	126.787	131.943	107.494	0.324483	0.130887	2.47911	0.0131711	0.139979
ENSMUSG00000015882	Lcorl	327.581	305.839	361.923	349.094	329.381	260.147	264.41	264.755	307.891	-0.22943	0.0987721	-2.32283	0.0201886	0.177047
ENSMUSG00000015889	Lta4h	910.395	874.102	852.698	801.919	809.027	903.47	756.387	781.243	836.155	-0.0741129	0.0775633	-0.955515	0.339317	0.688421
ENSMUSG00000015932	Dstn	4720.79	4423.57	4922.91	4424.52	4864.98	4238.42	4382.28	4073.75	4506.4	-0.0704397	0.0677751	-1.03932	0.298658	0.661142
ENSMUSG00000015937	H2afy	1168.64	1119.16	1214.62	1041.3	1281.46	1281.01	1276.54	1361.1	1217.98	0.182113	0.0691565	2.63334	0.00845489	0.107983
ENSMUSG00000015942	Gtf2ird2	77.3735	78.1482	77.6903	83.7826	74.5315	71.376	89.9429	100.694	81.6923	0.0622008	0.129212	0.481385	0.630243	0.868622
ENSMUSG00000015943	Bola1	137.665	123.493	106.114	83.7826	114.201	121.151	108.365	132.811	115.948	0.0587546	0.126132	0.465818	0.641346	0.874345
ENSMUSG00000015944	Gatsl2	189.917	163.05	259.599	275.286	227.201	349.367	278.498	298.608	255.191	0.276569	0.123975	2.23085	0.0256914	0.201474
ENSMUSG00000015947	Fcgr1	770.721	834.545	805.326	755.041	786.187	743.813	783.478	815.965	786.884	-0.0154738	0.0719269	-0.215132	0.829665	0.951631
ENSMUSG00000015950	Ncf1	5238.29	5656.58	4627.31	4820.49	4911.87	5023.56	4718.21	5090.23	5010.82	-0.0401732	0.0683953	-0.587367	0.556957	0.830185
ENSMUSG00000015957	Wnt11	11.0534	6.75355	13.2642	23.9379	15.6276	2.81747	8.66919	2.60414	10.5909	-0.156135	0.105248	-1.4835	0.137943	NA
ENSMUSG00000015961	Adss	830.007	752.538	892.49	707.165	807.825	740.056	806.235	815.965	794.035	-0.00545997	0.0820204	-0.0665684	0.946925	0.985868
ENSMUSG00000015968	Cacna1d	145.703	158.226	127.905	204.47	168.297	133.36	145.209	185.762	158.617	-0.00502002	0.123716	-0.0405771	0.967633	0.991642
ENSMUSG00000015971	Actr8	445.149	473.713	421.612	448.836	413.53	386.933	451.882	485.239	440.862	-0.0361865	0.0892804	-0.405313	0.685248	0.892904
ENSMUSG00000015980	Lrrc27	38.1843	25.0846	34.1079	40.8939	22.8403	29.1139	44.4296	37.326	33.9976	-0.0194664	0.138708	-0.140341	0.888391	NA
ENSMUSG00000015994	Fnta	1049.06	1173.19	1154.93	1103.14	1187.7	994.568	1182.26	1034.71	1109.94	-0.0258982	0.0769251	-0.336668	0.736367	0.916213
ENSMUSG00000016018	Skiv2l2	628.032	706.228	655.63	722.126	635.922	642.384	694.619	597.217	660.27	-0.0715537	0.0795667	-0.899292	0.368497	0.705791
ENSMUSG00000016024	Lbp	111.538	118.669	115.588	172.552	90.1591	99.5507	107.281	84.2006	112.442	-0.308986	0.12793	-2.41528	0.0157233	0.154724
ENSMUSG00000016087	Fli1	2111.19	1998.08	1998.16	1807.31	1876.51	2075.54	1927.81	2010.4	1975.63	-0.00359701	0.0668718	-0.0537896	0.957103	0.988955
ENSMUSG00000016128	Stard13	11.0534	11.5775	4.73721	10.9715	8.41485	14.0874	9.75284	13.8888	10.5604	0.0670393	0.118062	0.567831	0.570149	NA
ENSMUSG00000016181	Diexf	14.0679	25.0846	11.3693	15.9586	13.2233	15.0265	14.0874	13.0207	15.2298	-0.0807116	0.128237	-0.629395	0.52909	NA
ENSMUSG00000016206	H2-M3	607.935	531.6	541.937	516.66	518.114	449.857	491.977	467.01	515.636	-0.172391	0.0840624	-2.05075	0.040291	0.257697
ENSMUSG00000016239	Lonrf3	140.679	147.613	156.328	155.596	145.457	151.204	171.217	190.102	157.275	0.107973	0.112909	0.956284	0.338929	0.687943
ENSMUSG00000016252	Atp5e	486.348	467.924	434.876	385.999	736.9	580.4	490.893	544.266	515.951	0.336617	0.103784	3.24343	0.00118099	0.0322233
ENSMUSG00000016253	Nelfcd	417.013	549.932	421.612	410.934	405.115	479.91	486.558	448.781	452.482	0.0148651	0.0983967	0.151073	0.879918	0.96782
ENSMUSG00000016256	Ctsz	8979.35	8851.97	8880.37	8667.51	9145.74	8829.02	8412.37	8766.41	8816.59	-0.00898332	0.0508099	-0.176802	0.859664	0.964177
ENSMUSG00000016257	Slmo2	461.227	417.755	442.455	401.957	489.263	478.031	501.729	456.593	456.126	0.143073	0.0829991	1.72379	0.0847458	0.36984
ENSMUSG00000016262	Sertad4	6.02911	2.89438	7.57954	10.9715	0	2.81747	7.58554	8.68048	5.81976	-0.0581799	0.0896178	-0.649201	0.516209	NA
ENSMUSG00000016308	Ube2a	913.41	796.918	791.114	825.857	1014.59	789.832	856.083	726.556	839.295	0.0204088	0.0913522	0.223408	0.823218	0.948523
ENSMUSG00000016319	Slc25a5	5320.69	5345.91	5746.24	5036.93	6520.3	5536.34	6048.93	5335.89	5611.4	0.11868	0.0709601	1.67248	0.0944292	0.392952
ENSMUSG00000016344	Ppdpf	201.975	150.508	162.013	155.596	217.584	169.048	178.802	188.366	177.987	0.131748	0.113846	1.15725	0.247172	0.608701
ENSMUSG00000016382	Pls3	1945.39	1823.46	1730.03	1853.19	1455.77	1789.1	1743.59	1679.67	1752.52	-0.129256	0.0734519	-1.75974	0.0784518	0.355683
ENSMUSG00000016409	Nkap	232.121	203.571	249.177	198.485	193.541	206.615	276.33	236.109	224.494	0.0379467	0.111841	0.339291	0.73439	0.915251
ENSMUSG00000016427	Ndufa1	634.061	532.565	540.989	660.287	875.144	621.722	601.425	574.648	630.105	0.141638	0.106646	1.32812	0.184139	0.537086
ENSMUSG00000016477	E2f3	63.3056	81.0425	70.1107	56.8525	68.5209	83.585	79.1064	68.5758	71.3874	0.0944998	0.132007	0.715869	0.474072	0.780457
ENSMUSG00000016481	Cr1l	1042.03	1013.03	986.287	1027.33	1077.1	954.184	964.447	873.256	992.209	-0.0688228	0.0745337	-0.923379	0.35581	0.698698
ENSMUSG00000016487	Ppfibp1	501.421	561.509	514.461	546.582	524.125	595.426	571.083	689.23	562.98	0.147889	0.0887643	1.66608	0.0956966	0.395798
ENSMUSG00000016494	Cd34	58.2814	47.2748	78.6377	182.526	54.0954	83.585	91.0265	44.2704	79.9622	-0.0994195	0.117807	-0.843918	0.398715	0.728676
ENSMUSG00000016495	Plgrkt	413.999	312.593	348.659	371.037	429.157	429.195	412.87	381.073	387.323	0.166155	0.0942714	1.76251	0.0779825	0.354803
ENSMUSG00000016496	Cd274	69.3347	56.9227	51.1619	62.837	61.3082	77.9501	65.0189	63.3675	63.4876	0.102228	0.133586	0.765261	0.444116	0.759366
ENSMUSG00000016503	Gtf3a	111.538	139.895	113.693	111.71	146.659	146.509	132.205	135.415	129.703	0.179503	0.116809	1.53672	0.124362	0.44989
ENSMUSG00000016510	Mtif3	107.519	91.6553	94.7442	85.7775	117.808	89.22	94.2775	100.694	97.7119	0.0563879	0.124841	0.451678	0.651501	0.879293
ENSMUSG00000016520	Lnx2	227.096	301.98	206.542	231.4	200.754	227.276	236.235	246.526	234.726	-0.0671976	0.111072	-0.604994	0.545183	0.823937
ENSMUSG00000016526	Dyrk3	27.131	10.6127	15.1591	20.9457	19.2339	29.1139	10.8365	14.7568	18.4737	0.0025572	0.127276	0.0200917	0.98397	NA
ENSMUSG00000016528	Mapkapk2	1716.29	2593.36	2157.33	3054.08	3408.01	2528.21	2697.2	3255.18	2676.21	0.209637	0.132266	1.58496	0.112975	0.431402
ENSMUSG00000016529	Il10	50.2426	53.0636	54.9516	77.7982	48.0848	25.3573	39.0114	46.0065	49.3145	-0.305606	0.138839	-2.20116	0.0277248	NA
ENSMUSG00000016534	Lamp2	13940.3	12888.7	13555.1	12851.7	12693.2	11302.8	12572.5	11531.1	12666.9	-0.139412	0.0598884	-2.32787	0.0199191	0.176093
ENSMUSG00000016541	Atxn10	840.056	874.102	981.55	839.821	805.421	848.999	899.429	802.076	861.432	-0.069467	0.0767976	-0.904547	0.365705	0.704267
ENSMUSG00000016552	Foxred2	96.4657	54.0284	60.6363	111.71	62.5103	61.0453	52.0151	83.3326	72.718	-0.170428	0.138449	-1.23098	0.218332	0.579182
ENSMUSG00000016554	Eif3d	478.309	471.783	522.041	490.727	496.476	483.666	555.912	497.391	499.538	0.0451559	0.0818706	0.551553	0.581255	0.843406
ENSMUSG00000016559	H3f3b	11910.5	10644.6	11824.1	10704.2	12112.6	11430.5	11284	11058.1	11371.1	0.024052	0.0604619	0.397804	0.690775	0.896094
ENSMUSG00000016619	Nup50	484.338	566.333	559.938	459.807	512.104	503.389	542.908	520.829	518.706	0.0047669	0.086402	0.0551711	0.956002	0.988612
ENSMUSG00000016637	Ift27	133.645	137.965	130.747	139.638	171.903	156.839	149.544	131.075	143.92	0.129249	0.113888	1.13488	0.256426	0.617673
ENSMUSG00000016664	Pacsin2	4060.6	4374.37	3624.91	3699.4	3731.38	3620.45	3763.51	3810.73	3835.67	-0.0734283	0.0674874	-1.08803	0.276582	0.640027
ENSMUSG00000016756	Cmah	975.71	1077.67	903.86	710.158	645.539	643.323	627.433	816.833	800.066	-0.352421	0.103666	-3.39957	0.000674919	0.0226753
ENSMUSG00000016757	Ttll12	126.611	140.86	172.434	140.635	138.244	166.231	171.217	162.325	152.32	0.107132	0.115676	0.926132	0.354377	0.697936
ENSMUSG00000016831	Tox4	1071.17	1104.69	1073.45	931.583	1024.21	1027.44	1111.82	1144.09	1061.06	0.0401046	0.0751127	0.533926	0.593392	0.848476
ENSMUSG00000016833	Mrps18c	260.256	200.677	224.544	229.405	384.679	265.782	294.752	243.053	262.894	0.290544	0.115097	2.52434	0.0115916	0.130955
ENSMUSG00000016918	Sulf1	12.0582	15.4367	18.0014	31.9172	1.20212	12.2091	26.0076	9.54852	15.7976	-0.133188	0.112343	-1.18555	0.235801	NA
ENSMUSG00000016921	Srsf6	1149.55	1201.17	1218.41	1176.95	1123.98	1291.34	1270.04	1147.56	1197.37	0.0246569	0.0696707	0.353905	0.72341	0.910873
ENSMUSG00000016933	Plcg1	129.626	171.733	139.274	199.482	146.659	216.945	196.14	183.158	172.877	0.160527	0.122752	1.30773	0.190963	0.545498
ENSMUSG00000016940	Kctd2	144.699	223.832	148.748	238.382	212.775	181.257	185.304	217.012	194.001	0.0551017	0.123915	0.444673	0.656556	0.881807
ENSMUSG00000016946	Kctd5	234.13	264.353	243.493	234.392	256.052	295.835	238.403	268.227	254.36	0.100865	0.0993939	1.01481	0.310198	0.67
ENSMUSG00000016984	Etaa1	43.2086	34.7325	43.5823	62.837	61.3082	48.8362	60.6843	53.819	51.126	0.159199	0.137899	1.15447	0.248309	NA
ENSMUSG00000017009	Sdc4	579.799	713.946	782.587	802.917	694.826	776.684	892.927	573.78	727.183	0.0229637	0.107554	0.213509	0.83093	0.952422
ENSMUSG00000017057	Il13ra1	1653.98	1667.16	1688.34	1546.99	1452.16	1713.96	1916.97	1447.9	1635.93	-0.00519686	0.0840866	-0.0618037	0.950719	0.986878
ENSMUSG00000017119	Nbr1	1471.1	1501.22	1444.85	1501.11	1155.24	1271.62	1196.35	1256.06	1349.69	-0.26206	0.0632426	-4.14373	3.417e-05	0.00317182
ENSMUSG00000017132	Cyth1	1194.77	1256.16	1125.56	1362.47	1215.34	1408.74	1397.91	1430.54	1298.94	0.131858	0.0772106	1.70777	0.0876784	0.377009
ENSMUSG00000017144	Rnd3	302.46	351.184	476.563	414.923	405.115	442.343	368.441	365.448	390.81	0.0265616	0.108925	0.243851	0.807346	0.943862
ENSMUSG00000017146	Brca1	14.0679	35.6973	25.5809	34.9094	50.4891	39.4446	35.7604	27.7775	32.9659	0.195511	0.137288	1.4241	0.154418	NA
ENSMUSG00000017176	Nt5c3b	101.49	101.303	89.0596	76.8007	134.638	86.4025	74.7718	62.4994	90.8706	-0.0311921	0.136043	-0.229281	0.818651	0.947961
ENSMUSG00000017188	Coa3	306.48	319.346	333.5	272.294	424.349	327.766	313.175	326.386	327.912	0.144461	0.102492	1.40948	0.158692	0.502962
ENSMUSG00000017210	Med24	359.737	465.03	362.87	333.136	377.466	428.256	342.433	414.927	385.482	0.0345114	0.102732	0.335936	0.736919	0.916319
ENSMUSG00000017221	Psmd3	1220.89	1467.45	1291.36	1196.89	1236.98	1469.78	1329.64	1422.73	1329.47	0.0706363	0.0795645	0.887787	0.374656	0.710046
ENSMUSG00000017264	Exosc10	689.328	767.01	596.889	651.31	632.316	644.262	774.809	715.271	683.899	0.0293349	0.0895428	0.327608	0.743208	0.918128
ENSMUSG00000017286	Glod4	546.639	533.53	501.197	461.802	530.135	484.605	530.988	519.961	513.607	0.0134571	0.0827066	0.162709	0.870747	0.965781
ENSMUSG00000017288	Vps53	559.702	536.424	456.667	503.693	472.434	516.537	529.904	596.349	521.464	0.038243	0.0902608	0.423694	0.671789	0.88859
ENSMUSG00000017291	Taok1	546.639	398.459	528.673	553.564	432.764	423.56	438.878	467.878	473.802	-0.172266	0.096768	-1.78019	0.0750445	0.3483
ENSMUSG00000017299	Dnttip1	209.009	210.325	191.383	177.539	189.935	189.71	182.053	231.769	197.715	0.0107941	0.108201	0.0997594	0.920535	0.978635
ENSMUSG00000017307	Acot8	58.2814	58.8523	60.6363	70.8163	67.3188	52.5928	36.8441	49.4787	56.8526	-0.162535	0.136647	-1.18946	0.234259	0.593658
ENSMUSG00000017309	Cd300lg	338.635	305.839	262.441	278.278	260.86	300.531	241.654	280.379	283.577	-0.106184	0.102095	-1.04005	0.298315	0.661142
ENSMUSG00000017376	Nlk	48.2329	43.4156	66.3209	59.8447	45.6806	58.2278	54.1824	50.3468	53.2815	-0.0360826	0.136807	-0.263747	0.791975	NA
ENSMUSG00000017386	Traf4	4.0194	6.75355	2.84233	6.98189	2.40424	5.63495	13.0038	6.07633	5.96456	0.0556888	0.0963335	0.578083	0.563208	NA
ENSMUSG00000017390	Aldoc	28.1358	24.1198	23.6861	26.9301	27.6488	33.8097	19.5057	20.8331	25.5836	-0.0061656	0.137523	-0.0448332	0.96424	NA
ENSMUSG00000017400	Stac2	88.4269	82.0073	107.061	111.71	72.1273	119.273	115.95	85.0687	97.7031	0.00977565	0.131744	0.0742018	0.94085	0.984704
ENSMUSG00000017404	Rpl19	1190.75	1083.46	1037.45	1096.16	1468.99	1137.32	1169.26	1140.61	1165.5	0.139788	0.0847472	1.64947	0.099051	0.402099
ENSMUSG00000017405	Nek8	45.2183	51.134	36.9502	31.9172	46.8827	25.3573	30.3422	19.097	35.8624	-0.204035	0.13821	-1.47627	0.139871	NA
ENSMUSG00000017417	Plxdc1	522.523	463.1	489.828	418.913	367.849	376.602	400.95	412.323	431.511	-0.248266	0.0892086	-2.78299	0.0053861	0.0831526
ENSMUSG00000017418	Arl5b	320.548	275.931	396.978	341.115	335.392	302.409	324.011	353.295	331.21	-0.0178671	0.102501	-0.174312	0.86162	0.964878
ENSMUSG00000017421	Zfp207	2275.99	2195.87	2352.5	2188.32	2334.52	2010.74	2464.22	2263.87	2260.75	0.00843138	0.0697427	0.120893	0.903776	0.973048
ENSMUSG00000017428	Psmd11	1025.95	939.708	1007.13	928.591	923.229	995.507	985.037	931.415	967.071	-0.0228039	0.0696954	-0.327193	0.743522	0.918128
ENSMUSG00000017446	C1qtnf1	52.2523	33.7677	59.6889	94.7542	61.3082	66.6802	44.4296	34.7219	55.9504	-0.100105	0.138614	-0.722186	0.47018	0.777074
ENSMUSG00000017466	Timp2	47725.4	58716.3	46748.7	47829.9	50561.2	50955.9	50886	53209.6	50829.1	0.0302874	0.0713458	0.424515	0.67119	0.888215
ENSMUSG00000017478	Zc3h18	251.213	262.423	250.125	289.25	218.786	334.34	316.425	379.337	287.737	0.196686	0.114816	1.71305	0.0867026	0.374223
ENSMUSG00000017485	Top2b	1168.64	1139.42	1274.31	1232.8	1160.05	1064.07	1169.26	1315.09	1190.45	-0.0291953	0.0760152	-0.384072	0.700925	0.899792
ENSMUSG00000017491	Rarb	180.873	188.134	148.748	139.638	169.499	190.649	191.806	214.408	177.969	0.177144	0.113839	1.55608	0.119688	0.444269
ENSMUSG00000017493	Igfbp4	1510.29	1615.06	2169.64	2077.61	1764.71	1911.19	1569.12	1527.76	1768.17	-0.104474	0.0988074	-1.05736	0.290349	0.652742
ENSMUSG00000017499	Cdc6	40.194	25.0846	44.5298	27.9275	45.6806	65.741	44.4296	45.1385	42.3407	0.276113	0.139071	1.98542	0.0470982	NA
ENSMUSG00000017548	Suz12	211.019	207.43	220.754	250.35	223.595	181.257	243.821	269.095	225.915	0.0368094	0.111616	0.329787	0.741561	0.917723
ENSMUSG00000017550	Atad5	48.2329	44.3804	45.4772	42.8887	51.6912	49.7754	43.346	61.6314	48.4279	0.114676	0.136939	0.837422	0.402356	NA
ENSMUSG00000017561	Crlf3	681.289	594.312	706.792	618.396	608.273	571.947	630.684	559.023	621.339	-0.122666	0.082057	-1.49488	0.134945	0.470399
ENSMUSG00000017607	Tns4	41.1989	46.31	40.74	52.8628	37.2658	39.4446	29.2585	35.59	40.3338	-0.191712	0.138548	-1.38372	0.166445	NA
ENSMUSG00000017615	Tnfaip1	1131.46	1138.45	1073.45	1034.32	1002.57	1121.35	1103.15	1021.69	1078.31	-0.0398359	0.0701151	-0.568151	0.569933	0.835914
ENSMUSG00000017631	Abr	485.343	452.488	437.718	531.621	534.944	524.05	430.209	534.717	491.386	0.0761239	0.0916758	0.83036	0.406335	0.733783
ENSMUSG00000017652	Cd40	1559.53	1752.06	1209.88	1182.93	1550.74	1239.69	1414.16	1364.57	1409.2	-0.0297618	0.100754	-0.295391	0.767695	0.927002
ENSMUSG00000017664	Slc35c2	410.984	531.6	404.558	432.877	406.317	396.325	422.623	356.768	420.256	-0.147975	0.0965177	-1.53314	0.125242	0.451434
ENSMUSG00000017670	Elmo2	736.556	905.94	568.465	710.158	893.176	716.577	856.083	726.556	764.189	0.105147	0.10465	1.00475	0.315017	0.672293
ENSMUSG00000017677	Wsb1	4251.53	4390.77	5121.87	4577.12	4507.95	3997.99	4254.41	4123.23	4403.11	-0.11199	0.0689893	-1.62329	0.104528	0.412981
ENSMUSG00000017679	Ttpal	388.877	520.988	456.667	458.81	413.53	477.092	446.463	448.781	451.401	-0.0266583	0.0925331	-0.288095	0.773274	0.929829
ENSMUSG00000017686	Rhot1	853.119	789.2	836.591	770.002	833.07	707.186	815.988	823.777	803.617	-0.0291605	0.0770968	-0.378232	0.705258	0.901753
ENSMUSG00000017697	Ada	50.2426	51.134	53.0568	68.8214	80.5421	50.7145	41.1787	63.3675	57.3822	0.0420613	0.13795	0.304902	0.760441	0.9234
ENSMUSG00000017707	Serinc3	38704.9	38377.5	37236.4	36674.8	36372.6	36533.2	35665.1	34455.4	36752.5	-0.0757261	0.0489899	-1.54575	0.122165	0.447354
ENSMUSG00000017713	Tha1	28.1358	32.8029	27.4758	29.9224	20.4361	30.9922	22.7566	41.6663	29.2735	-0.0056597	0.138023	-0.0410055	0.967292	NA
ENSMUSG00000017715	Pgs1	478.309	610.713	591.204	564.535	518.114	519.354	537.49	655.376	559.387	-0.00661135	0.094706	-0.0698092	0.944346	0.985464
ENSMUSG00000017716	Birc5	128.621	200.677	114.64	116.697	262.062	232.911	169.049	185.762	176.303	0.404134	0.130082	3.10677	0.00189141	0.0436673
ENSMUSG00000017718	Afmid	14.0679	16.4015	9.47442	20.9457	27.6488	22.5398	23.8403	12.1527	18.3839	0.156216	0.129862	1.20293	0.229002	NA
ENSMUSG00000017721	Pigt	79.3832	82.0073	85.2698	79.793	70.9251	109.881	75.8554	72.916	82.0039	0.0119121	0.131173	0.0908121	0.927642	0.979994
ENSMUSG00000017734	Dbndd2	7.03396	7.71834	4.73721	6.98189	4.80848	10.3307	8.66919	3.47219	6.719	0.00737599	0.103568	0.0712192	0.943223	NA
ENSMUSG00000017737	Mmp9	10.0485	9.64792	18.9488	19.9482	15.6276	20.6615	17.3384	20.8331	16.6318	0.112017	0.129554	0.864634	0.38724	NA
ENSMUSG00000017747	Ghdc	158.766	177.522	165.802	149.612	121.414	149.326	132.205	136.283	148.866	-0.214246	0.112584	-1.90299	0.0570415	0.306943
ENSMUSG00000017754	Pltp	20304	21147.3	19551.4	17997.3	16108.4	17187.5	15871.1	17284.6	18181.5	-0.236094	0.0626497	-3.76848	0.000164242	0.0088026
ENSMUSG00000017756	Slc12a7	1302.29	1398.95	1303.68	1565.94	1408.89	1691.42	1449.92	1628.46	1468.69	0.136885	0.0800654	1.70967	0.0873271	0.375857
ENSMUSG00000017760	Ctsa	14263.9	15700.1	13887.6	13455.1	13282.2	13787.8	13917.3	13686.5	13997.6	-0.0645739	0.0594487	-1.08621	0.277386	0.640693
ENSMUSG00000017764	Zswim1	113.548	131.212	87.1647	98.7438	116.606	114.577	136.54	130.207	116.075	0.152918	0.123886	1.23435	0.217074	0.577922
ENSMUSG00000017765	Slc12a4	999.827	1111.44	991.972	1012.37	980.931	1184.28	1142.17	1126.73	1068.71	0.100084	0.0755837	1.32415	0.185452	0.538034
ENSMUSG00000017774	Myo1c	2839.71	3283.19	2943.7	3222.64	3069.01	3717.19	3571.71	3818.54	3308.21	0.190062	0.0756939	2.51092	0.0120416	0.133387
ENSMUSG00000017776	Crk	2360.4	2611.69	2395.13	2465.6	2421.07	2418.33	2389.45	2179.67	2405.17	-0.0607192	0.0631364	-0.961714	0.336193	0.686258
ENSMUSG00000017778	Cox7c	845.08	659.918	679.316	603.434	1110.76	819.885	746.634	801.208	783.279	0.261502	0.106296	2.46014	0.0138884	0.143903
ENSMUSG00000017781	Pitpna	9641.55	9824.48	9446.94	9769.65	10636.4	9571.9	10431.2	9808.07	9891.27	0.0615497	0.0547765	1.12365	0.261161	0.622363
ENSMUSG00000017801	Mlx	229.106	291.367	245.387	242.371	289.711	263.903	253.574	241.317	257.092	0.0447959	0.101829	0.439914	0.659999	0.884404
ENSMUSG00000017802	Fam134c	157.762	109.986	109.903	155.596	125.021	121.151	120.285	148.436	131.018	-0.0334323	0.124498	-0.268536	0.788286	0.93573
ENSMUSG00000017830	Dhx58	220.062	247.952	200.858	223.42	164.691	197.223	201.559	300.344	219.514	-0.0298683	0.122385	-0.244052	0.807191	0.943862
ENSMUSG00000017831	Rab5a	2170.48	1987.47	2271.97	2031.73	2136.17	1777.83	1948.4	1828.98	2019.13	-0.12852	0.0728897	-1.76321	0.0778644	0.354444
ENSMUSG00000017837	Nkiras2	744.595	731.312	812.905	767.01	772.964	748.509	651.273	674.473	737.88	-0.0940537	0.0787061	-1.195	0.232088	0.591733
ENSMUSG00000017843	Ppp2r5c	954.609	1172.22	1066.82	1197.89	1156.44	1164.56	1184.43	1302.07	1149.88	0.119368	0.0797217	1.49731	0.134312	0.469283
ENSMUSG00000017858	Ift52	490.367	478.537	415.927	368.045	455.604	428.256	399.866	400.17	429.597	-0.0510593	0.0956202	-0.53398	0.593355	0.848476
ENSMUSG00000017861	Mybl2	30.1455	45.3452	46.4247	44.8836	45.6806	78.8893	45.5133	72.916	51.2248	0.291131	0.138863	2.09653	0.0360352	NA
ENSMUSG00000017929	B4galt5	167.81	254.705	244.44	388.991	345.009	227.276	307.756	316.837	281.603	0.119974	0.130946	0.916215	0.359554	0.701204
ENSMUSG00000017969	Ptgis	1.00485	4.82396	9.47442	20.9457	7.21273	4.69579	5.41824	3.47219	7.13098	-0.101429	0.0926788	-1.09442	0.273772	NA
ENSMUSG00000017999	Ddx27	286.383	410.037	416.875	363.058	372.658	364.393	385.779	436.628	379.476	0.0661221	0.104295	0.63399	0.526087	0.811389
ENSMUSG00000018001	Cyth3	659.182	679.214	625.312	684.225	651.55	641.445	627.433	620.654	648.627	-0.055354	0.0733606	-0.754547	0.450521	0.765539
ENSMUSG00000018008	Cyth4	2987.42	3261.96	2584.62	2597.26	2785.31	3404.45	3014.71	3510.38	3018.27	0.13779	0.0856708	1.60837	0.107754	0.419753
ENSMUSG00000018012	Rac3	218.053	229.621	199.91	175.545	230.807	191.588	202.642	184.894	204.132	-0.0226003	0.108861	-0.207607	0.835536	0.954605
ENSMUSG00000018040	Rrp7a	314.518	446.699	324.025	271.296	330.583	420.743	435.627	431.42	371.864	0.201234	0.114076	1.76404	0.0777251	0.354168
ENSMUSG00000018042	Cyb5r3	4797.16	4878.95	4389.5	4956.14	5327.8	5557.94	5050.89	4797.7	4969.51	0.11708	0.0650019	1.80118	0.0716748	0.341334
ENSMUSG00000018068	Ints2	100.485	158.226	121.273	129.664	98.5739	170.927	125.703	149.304	131.769	0.0693626	0.129565	0.535348	0.592409	0.848291
ENSMUSG00000018076	Med13l	215.038	191.029	231.176	253.343	242.828	238.546	212.395	257.81	230.271	0.0804608	0.105502	0.76265	0.445672	0.760006
ENSMUSG00000018102	Hist1h2bc	396.916	365.656	391.294	361.063	504.891	370.967	343.517	366.316	387.578	0.0520667	0.102927	0.505859	0.612956	0.859568
ENSMUSG00000018143	Mafk	1157.59	1467.45	1398.42	1485.15	1380.03	1204	1226.69	1245.65	1320.62	-0.112543	0.0818575	-1.37486	0.169174	0.516957
ENSMUSG00000018160	Med1	259.252	219.973	234.966	258.33	223.595	197.223	248.156	238.713	235.026	-0.0831645	0.103276	-0.805266	0.420666	0.743247
ENSMUSG00000018166	Erbb3	40.194	48.2396	40.74	41.8913	15.6276	12.2091	26.0076	26.0414	31.3688	-0.482737	0.138336	-3.4896	0.000483748	NA
ENSMUSG00000018167	Stard3	557.692	597.206	562.781	558.551	461.614	500.571	501.729	579.856	540	-0.136824	0.0843741	-1.62163	0.104882	0.413831
ENSMUSG00000018169	Mfng	163.791	236.374	162.013	167.565	201.956	228.215	205.893	205.727	196.442	0.161722	0.114717	1.40975	0.158614	0.502962
ENSMUSG00000018171	Vmp1	980.735	1009.17	949.337	1003.4	974.92	941.036	930.854	915.79	963.155	-0.0640422	0.0661135	-0.968669	0.33271	0.683965
ENSMUSG00000018189	Uchl5	663.202	636.763	723.846	615.403	790.996	702.49	740.132	703.119	696.994	0.138736	0.0788598	1.75927	0.0785316	0.355683
ENSMUSG00000018196	Glrx2	261.261	225.761	265.284	276.283	276.488	278.93	257.908	263.018	263.117	0.0561399	0.0972012	0.577565	0.563558	0.832372
ENSMUSG00000018199	Trove2	379.834	386.882	431.086	341.115	361.838	288.321	338.098	318.573	355.719	-0.205796	0.0966063	-2.13026	0.0331502	0.232425
ENSMUSG00000018209	Stk4	832.017	828.756	880.174	899.666	884.761	892.2	892.927	935.755	880.782	0.0638098	0.0687063	0.928733	0.353027	0.697457
ENSMUSG00000018217	Pmp22	16072.6	14814.4	14943.1	14991.1	13254.6	12616.6	13227	12580.6	14062.5	-0.226287	0.0528264	-4.2836	1.83892e-05	0.0020959
ENSMUSG00000018239	Zcchc10	65.3153	54.0284	65.3735	65.8292	63.7124	46.9579	63.9353	57.2911	60.3054	-0.073624	0.134309	-0.54817	0.583575	0.844695
ENSMUSG00000018286	Psmb6	1306.31	1353.6	1441.06	1249.76	1638.49	1466.03	1534.45	1355.89	1418.2	0.14989	0.0742868	2.01772	0.0436209	0.268894
ENSMUSG00000018287	Spag7	572.765	539.319	561.833	578.499	610.677	571.008	529.904	552.078	564.511	0.00563829	0.0781972	0.0721036	0.942519	0.984891
ENSMUSG00000018293	Pfn1	8891.93	7488.72	8726.89	7170.4	9026.73	9680.84	8706.03	8881	8571.57	0.156334	0.0738176	2.11784	0.0341886	0.236796
ENSMUSG00000018322	Tomm34	441.13	419.685	425.401	416.918	400.306	361.576	424.79	420.135	413.743	-0.0754184	0.0854667	-0.882431	0.377544	0.712514
ENSMUSG00000018326	Ywhab	3132.12	3177.06	2832.85	2782.78	3212.07	3301.14	3312.71	2979.14	3091.23	0.0963009	0.0663409	1.45161	0.146611	0.488198
ENSMUSG00000018334	Ksr1	6.02911	13.5071	1.89488	9.97412	6.01061	2.81747	2.1673	6.94438	6.16812	-0.103403	0.0940071	-1.09995	0.271352	NA
ENSMUSG00000018339	Gpx3	298.441	330.924	374.24	534.613	264.467	371.907	383.612	288.192	355.799	-0.169843	0.123601	-1.37411	0.169406	0.517062
ENSMUSG00000018340	Anxa6	4066.63	4357.97	4216.12	3887.91	3343.1	3834.58	3689.82	3628.44	3878.07	-0.178648	0.0632095	-2.82628	0.00470914	0.077544
ENSMUSG00000018347	Zkscan6	81.3929	63.6763	77.6903	67.824	76.9357	75.1326	61.768	78.1243	72.818	0.00595778	0.130827	0.0455394	0.963677	0.990818
ENSMUSG00000018362	Kpna2	822.973	844.193	862.172	749.057	827.059	859.329	889.676	811.625	833.261	0.0432129	0.0735497	0.587533	0.556846	0.830185
ENSMUSG00000018363	Smurf2	221.067	262.423	316.446	340.118	337.796	239.485	364.106	297.74	297.398	0.0896798	0.118023	0.759847	0.447346	0.761715
ENSMUSG00000018372	Cep95	70.3396	74.289	59.6889	70.8163	74.5315	62.9236	79.1064	71.1799	70.3594	0.0413724	0.130935	0.315975	0.752021	0.921316
ENSMUSG00000018377	Vezf1	450.173	457.311	486.038	487.735	425.551	415.108	454.049	349.823	440.723	-0.17355	0.09023	-1.92342	0.0544279	0.29864
ENSMUSG00000018379	Srsf1	646.119	693.686	786.377	718.137	601.061	681.829	684.866	611.974	678.006	-0.127121	0.0825447	-1.54002	0.123555	0.449151
ENSMUSG00000018395	Kif3a	359.737	301.015	343.921	320.169	348.615	262.964	262.243	301.213	312.485	-0.14778	0.101557	-1.45515	0.145628	0.487262
ENSMUSG00000018398	2008-09-01	902.356	858.665	937.968	907.645	944.867	1018.05	935.189	1039.92	943.082	0.11944	0.0703645	1.69744	0.0896132	0.381502
ENSMUSG00000018401	Mtmr4	150.728	159.191	168.645	183.524	150.265	119.273	169.049	185.762	160.805	-0.0633289	0.119157	-0.531476	0.595089	0.848888
ENSMUSG00000018405	Mrm1	114.553	143.754	126.01	110.713	115.404	122.091	114.867	114.582	120.247	-0.0643938	0.118646	-0.54274	0.587309	0.845425
ENSMUSG00000018412	Kansl1	541.615	514.234	537.2	542.592	507.295	509.963	433.46	552.078	517.305	-0.0811321	0.0852311	-0.951907	0.341144	0.689796
ENSMUSG00000018415	Gid4	174.844	164.015	152.538	174.547	183.925	193.467	123.536	207.463	171.792	0.0701567	0.120342	0.582976	0.55991	0.831377
ENSMUSG00000018417	Myo1b	2.0097	14.4719	6.63209	16.956	12.0212	13.1482	19.5057	3.47219	11.0271	0.0423672	0.10409	0.407023	0.683991	NA
ENSMUSG00000018425	Dhx40	374.809	364.691	407.4	374.03	351.019	296.774	393.365	353.295	364.423	-0.11025	0.0944857	-1.16684	0.243273	0.604151
ENSMUSG00000018427	Ypel2	48.2329	27.0142	46.4247	40.8939	27.6488	31.9314	28.1749	26.9095	34.6538	-0.243293	0.139024	-1.75001	0.0801171	NA
ENSMUSG00000018428	Akap1	165.8	144.719	147.801	179.534	144.255	132.421	143.042	160.589	152.27	-0.105862	0.113489	-0.932802	0.350922	0.69657
ENSMUSG00000018433	Nol11	396.916	333.818	362.87	324.159	343.807	348.428	369.524	313.365	349.111	-0.0395847	0.0937929	-0.422044	0.672993	0.888779
ENSMUSG00000018442	Derl2	659.182	669.566	752.269	634.354	661.167	719.395	741.216	652.772	686.24	0.0277673	0.0804257	0.345254	0.729903	0.913079
ENSMUSG00000018446	C1qbp	594.872	581.77	612.048	470.779	592.646	641.445	619.847	630.203	592.951	0.122282	0.0867702	1.40926	0.158757	0.502974
ENSMUSG00000018449	Rpain	283.368	292.332	310.761	290.247	373.86	242.303	361.939	331.594	310.8	0.1229	0.108124	1.13666	0.25568	0.616701
ENSMUSG00000018459	Slc13a3	56.2717	18.3311	48.3195	49.8706	57.7018	88.2808	33.5931	46.0065	49.7969	0.157055	0.136559	1.15009	0.250106	NA
ENSMUSG00000018470	Kcnab3	13.0631	11.5775	16.1065	5.98447	14.4255	10.3307	19.5057	13.8888	13.1103	0.0819582	0.123228	0.665093	0.505991	NA
ENSMUSG00000018474	Chd3	82.3978	54.9932	77.6903	78.7956	67.3188	69.4977	59.6007	90.277	72.5714	-0.0177899	0.134243	-0.13252	0.894573	0.970537
ENSMUSG00000018476	Kdm6b	154.747	186.205	212.227	167.565	168.297	162.474	175.551	171.873	174.868	-0.0713635	0.111329	-0.641015	0.521513	0.810279
ENSMUSG00000018481	Appbp2	718.469	833.58	838.486	736.09	718.868	685.585	759.638	715.271	750.749	-0.109453	0.0782938	-1.39797	0.162121	0.508712
ENSMUSG00000018500	Adora2b	179.868	178.487	141.169	208.459	187.531	171.866	173.384	184.026	178.099	0.0145513	0.113025	0.128745	0.897559	0.971337
ENSMUSG00000018501	Ncor1	1025.95	1055.48	1175.78	1097.15	1010.98	1097.88	1037.05	1171.86	1084.02	-0.00999506	0.0737725	-0.135485	0.892229	0.970529
ENSMUSG00000018507	Trpv2	1055.09	1237.83	1049.77	969.485	890.772	892.2	877.756	969.609	992.814	-0.224954	0.0803588	-2.79936	0.00512034	0.0811853
ENSMUSG00000018509	Cenpv	18.0873	27.0142	27.4758	28.925	26.4467	20.6615	26.0076	30.3817	25.625	0.0119562	0.13765	0.0868588	0.930784	NA
ENSMUSG00000018541	Cwc25	241.164	275.931	313.603	256.335	265.669	246.059	292.585	315.101	275.806	0.0356494	0.104282	0.341855	0.73246	0.913951
ENSMUSG00000018547	Pip4k2b	14.0679	6.75355	16.1065	7.9793	13.2233	8.45242	22.7566	11.2846	12.578	0.0720638	0.119045	0.605352	0.544945	NA
ENSMUSG00000018548	Trim37	184.893	229.621	167.697	212.449	221.19	246.059	239.486	223.956	215.669	0.187044	0.107382	1.74186	0.0815324	0.362348
ENSMUSG00000018559	Ctdnep1	88.4269	105.162	100.429	119.689	175.51	109.881	120.285	109.374	116.095	0.211823	0.128813	1.64442	0.100089	0.403404
ENSMUSG00000018565	Elp5	399.931	474.678	474.668	405.947	435.168	432.013	493.06	430.552	443.252	0.0242409	0.0898668	0.269743	0.787358	0.93573
ENSMUSG00000018567	Gabarap	3933.99	3305.38	3707.34	3499.92	4236.27	3545.32	3662.73	3368.89	3657.48	0.0325991	0.0769606	0.423582	0.671871	0.88859
ENSMUSG00000018572	Phf23	1251.04	1257.12	1249.68	1183.93	1554.34	1259.41	1341.56	1346.34	1305.43	0.141856	0.073366	1.93354	0.0531694	0.294377
ENSMUSG00000018574	Acadvl	591.857	705.263	678.369	586.478	596.252	555.042	590.589	560.759	608.076	-0.140253	0.082876	-1.69232	0.0905841	0.383821
ENSMUSG00000018583	G3bp1	1449	1643.04	1532.01	1387.4	1355.99	1587.18	1586.46	1547.73	1511.1	0.0151379	0.0748198	0.202325	0.839663	0.956621
ENSMUSG00000018585	Atox1	1355.54	1216.6	1147.35	1110.12	1821.21	1591.87	1410.91	1450.51	1388.02	0.336867	0.085628	3.93408	8.35165e-05	0.00552524
ENSMUSG00000018593	Sparc	15045.6	14989	11349.4	13480	16396.9	17761.4	18198.8	17301.1	15565.3	0.313981	0.0790114	3.97387	7.07131e-05	0.00486031
ENSMUSG00000018599	Mief2	34.1649	55.9579	38.8451	34.9094	46.8827	51.6537	53.0988	53.819	46.1664	0.181668	0.138223	1.31431	0.188743	NA
ENSMUSG00000018648	Dusp14	3.01455	6.75355	15.1591	3.98965	6.01061	12.2091	4.3346	6.94438	7.30193	0.00513483	0.0997185	0.0514933	0.958932	NA
ENSMUSG00000018651	Tada2a	86.4172	88.7609	75.7954	69.8189	58.9039	76.0718	67.1862	76.3882	74.9178	-0.132222	0.130563	-1.01271	0.311201	0.670478
ENSMUSG00000018654	Ikzf1	289.397	268.212	236.861	334.133	294.52	281.747	335.931	393.226	304.253	0.170978	0.110599	1.54592	0.122124	0.447354
ENSMUSG00000018659	Pnpo	180.873	178.487	198.963	205.467	157.478	212.25	160.38	179.686	184.198	-0.0809186	0.111284	-0.727136	0.467143	0.776506
ENSMUSG00000018661	Cog1	342.654	371.445	339.184	350.092	276.488	373.785	326.178	363.712	342.942	-0.0529752	0.0974216	-0.543772	0.586598	0.845138
ENSMUSG00000018666	Cbx1	131.635	112.881	106.114	115.7	112.999	105.186	115.95	97.2213	112.211	-0.0869285	0.120226	-0.723044	0.469653	0.776856
ENSMUSG00000018669	Cdk5rap3	410.984	406.178	342.974	403.952	340.2	384.116	346.768	335.934	371.388	-0.132856	0.0914208	-1.45324	0.146157	0.487262
ENSMUSG00000018672	Copz2	209.009	193.923	206.542	212.449	233.211	233.85	240.57	252.602	222.77	0.192706	0.0985007	1.95639	0.0504188	0.288035
ENSMUSG00000018677	Slc25a39	1193.76	1183.8	1267.68	1099.15	1131.2	1250.02	1213.69	1184.89	1190.52	0.0104144	0.0692089	0.150478	0.880387	0.96782
ENSMUSG00000018678	Sp2	164.796	167.874	164.855	192.501	174.308	231.033	182.053	177.082	181.813	0.119921	0.111943	1.07127	0.284048	0.646014
ENSMUSG00000018697	Aatf	300.45	248.916	292.76	215.441	272.881	260.147	263.327	260.414	264.292	-0.00176157	0.104397	-0.0168738	0.986537	0.99651
ENSMUSG00000018707	Dync1h1	843.07	719.735	936.073	827.852	723.677	892.2	840.912	1151.03	866.819	0.0988632	0.104498	0.946081	0.344107	0.691454
ENSMUSG00000018733	Pex12	98.4754	92.62	87.1647	110.713	88.957	97.6724	120.285	117.186	101.634	0.0926323	0.125203	0.739858	0.459386	0.769876
ENSMUSG00000018736	Ndel1	1858.97	2072.37	2261.54	2006.79	1753.89	1802.24	1997.16	1868.91	1952.74	-0.133318	0.072263	-1.84491	0.0650511	0.327035
ENSMUSG00000018740	Slc25a35	47.228	54.0284	44.5298	58.8473	42.0742	47.8971	48.7642	52.0829	49.4315	-0.056562	0.136661	-0.413884	0.678959	NA
ENSMUSG00000018750	Zbtb4	142.689	131.212	138.327	116.697	122.616	174.683	132.205	123.263	135.211	0.0493795	0.121139	0.407627	0.683548	0.892395
ENSMUSG00000018752	Tnfsfm13	51.2474	60.7819	44.5298	36.9043	49.287	53.532	59.6007	46.0065	50.2362	0.0600982	0.137589	0.436794	0.662261	NA
ENSMUSG00000018761	Mpdu1	397.921	327.065	397.926	356.076	367.849	437.648	364.106	401.906	381.312	0.0779855	0.0943445	0.826604	0.408462	0.735724
ENSMUSG00000018765	Fxr2	217.048	270.142	197.068	293.239	288.509	250.755	304.505	312.497	266.72	0.193559	0.111728	1.7324	0.0832016	0.366869
ENSMUSG00000018770	Atp5g3	1713.27	1644.97	1600.23	1487.14	2084.48	1681.09	1581.04	1521.69	1664.24	0.0805113	0.086902	0.92646	0.354207	0.697936
ENSMUSG00000018774	Cd68	21751	19804.3	21228.4	19272	16513.5	18645.1	18826.2	18382.6	19302.9	-0.171328	0.0630652	-2.71669	0.00659386	0.0935693
ENSMUSG00000018796	Acsl1	310.499	358.903	387.504	369.043	376.264	357.819	352.186	414.059	365.784	0.0645287	0.093742	0.688364	0.491223	0.79279
ENSMUSG00000018800	Abca5	5.02426	19.2958	25.5809	17.9534	10.8191	11.2699	14.0874	10.4166	14.3059	-0.137895	0.120948	-1.14012	0.254236	NA
ENSMUSG00000018809	Smyd4	111.538	98.4088	90.9544	103.731	70.9251	109.881	81.2737	76.3882	92.8876	-0.173292	0.128934	-1.34403	0.178938	0.529912
ENSMUSG00000018819	Lsp1	3108	3575.52	2967.39	2652.12	3404.41	3314.29	3312.71	3336.78	3208.9	0.109564	0.077351	1.41645	0.156645	0.501322
ENSMUSG00000018820	Zfyve27	254.227	286.543	254.862	257.332	244.031	236.668	257.908	241.317	254.111	-0.0903801	0.0959215	-0.94223	0.346075	0.693537
ENSMUSG00000018821	Avpi1	439.12	475.643	505.934	486.737	515.71	566.312	504.98	585.064	509.938	0.170229	0.083962	2.02745	0.0426163	0.264268
ENSMUSG00000018830	Myh11	2.0097	14.4719	11.3693	17.9534	9.61697	24.4181	28.1749	25.1734	16.6485	0.222041	0.118874	1.86786	0.0617813	NA
ENSMUSG00000018841	Rad51d	90.4366	84.9017	76.7428	94.7542	87.7548	77.9501	72.6045	82.4645	83.4512	-0.0794111	0.127024	-0.625165	0.531863	0.814992
ENSMUSG00000018846	Pank3	418.018	380.128	446.245	440.856	411.125	311.8	395.532	381.941	398.206	-0.146833	0.0955757	-1.5363	0.124464	0.44989
ENSMUSG00000018848	Rars	629.037	653.164	552.359	543.59	677.996	523.111	560.246	593.745	591.656	-0.013914	0.0912796	-0.152433	0.878845	0.96782
ENSMUSG00000018849	Wwc1	6.02911	3.85917	6.63209	8.97671	2.40424	8.45242	4.3346	5.20829	5.73708	-0.0433857	0.0982546	-0.441564	0.658805	NA
ENSMUSG00000018858	Ict1	188.912	196.818	185.699	152.604	193.541	183.136	185.304	184.894	183.863	0.0354131	0.107398	0.329737	0.741598	0.917723
ENSMUSG00000018861	Fdxr	32.1552	44.3804	43.5823	47.8758	34.8615	45.0796	33.5931	33.8539	39.4227	-0.0985326	0.13886	-0.70958	0.477964	NA
ENSMUSG00000018882	Mrpl45	147.713	135.071	167.697	140.635	167.095	138.056	138.707	145.832	147.601	-0.00559711	0.114065	-0.0490696	0.960864	0.989888
ENSMUSG00000018893	Mb	4.0194	5.78875	11.3693	2.99224	4.80848	12.2091	5.41824	8.68048	6.91074	0.0589738	0.10114	0.583094	0.55983	NA
ENSMUSG00000018899	Irf1	1476.13	1839.86	1728.13	1604.84	1559.15	1570.27	1782.6	1577.24	1642.28	-0.0324938	0.0771573	-0.421137	0.673655	0.888861
ENSMUSG00000018900	Slc22a5	144.699	163.05	145.906	128.666	110.595	106.125	131.122	125.867	132.004	-0.228364	0.117455	-1.94427	0.0518629	0.291026
ENSMUSG00000018906	P4ha2	64.3105	117.705	81.48	72.8111	86.5527	74.1935	108.365	88.5409	86.7448	0.0534569	0.134579	0.397216	0.691208	0.896132
ENSMUSG00000018909	Arrb1	388.877	422.579	374.24	401.957	567.401	601.061	589.505	608.501	494.265	0.524361	0.0800938	6.54684	5.8768e-11	7.55925e-08
ENSMUSG00000018919	Tm4sf5	4.0194	4.82396	7.57954	4.98706	3.60636	3.75663	4.3346	4.34024	4.68097	-0.0549141	0.094339	-0.582093	0.560504	NA
ENSMUSG00000018920	Cxcl16	1912.23	2164.03	1877.83	1852.19	1710.62	2020.13	1922.39	1889.74	1918.65	-0.0452916	0.0725648	-0.624153	0.532527	0.815551
ENSMUSG00000018921	Pelp1	38.1843	34.7325	43.5823	44.8836	56.4997	46.0187	40.095	72.048	47.0055	0.224654	0.138651	1.62028	0.105172	NA
ENSMUSG00000018923	Med11	171.83	147.613	169.592	177.539	192.339	185.953	165.798	180.554	173.902	0.0982351	0.107892	0.910491	0.362563	0.703333
ENSMUSG00000018927	Ccl6	2123.25	1615.06	2785.48	3486.95	3058.2	2220.17	2037.26	2017.34	2417.96	-0.0530778	0.138917	-0.382082	0.7024	0.90054
ENSMUSG00000018930	Ccl4	872.211	802.707	782.587	733.098	716.464	628.297	837.661	826.381	774.926	-0.0742214	0.0906894	-0.818413	0.413121	0.737941
ENSMUSG00000018931	Natd1	281.358	355.044	288.022	319.172	252.445	268.599	253.574	290.796	288.626	-0.18746	0.0993066	-1.88769	0.0590672	0.313216
ENSMUSG00000018932	Map2k3	2029.8	2479.52	2471.88	2421.72	2190.26	2300	2508.65	2201.37	2325.4	-0.0291218	0.0753938	-0.386262	0.699302	0.898819
ENSMUSG00000018965	Ywhah	2614.62	2802.72	2743.79	2480.56	2832.2	2500.98	2519.48	2447.89	2617.78	-0.0448542	0.0673582	-0.665906	0.505471	0.798888
ENSMUSG00000018974	Sart3	261.261	293.297	263.389	271.296	252.445	303.348	299.087	280.379	278.063	0.0530926	0.0961265	0.55232	0.580729	0.843233
ENSMUSG00000018983	E2f2	60.2911	65.6059	36.9502	73.8085	141.85	104.247	93.1938	92.0131	83.4949	0.516565	0.13617	3.79353	0.000148521	0.00815417
ENSMUSG00000018986	Slfn3	13.0631	13.5071	16.1065	11.9689	26.4467	16.9048	24.9239	16.4929	17.4267	0.209201	0.131865	1.58648	0.112631	NA
ENSMUSG00000018995	Nars2	104.505	105.162	121.273	98.7438	99.776	133.36	99.6957	131.943	111.807	0.0871465	0.124045	0.702539	0.482343	0.787207
ENSMUSG00000018999	Slc35b4	709.425	819.109	701.107	735.093	739.304	669.62	703.288	726.556	725.438	-0.0579425	0.0772784	-0.749789	0.453382	0.766967
ENSMUSG00000019039	Dalrd3	129.626	166.909	141.169	151.607	108.191	144.63	147.376	144.964	141.809	-0.0820642	0.118346	-0.693425	0.488043	0.790918
ENSMUSG00000019054	Fis1	763.687	700.439	728.583	671.258	792.198	787.953	756.387	747.389	743.487	0.0983164	0.073156	1.34393	0.178972	0.529912
ENSMUSG00000019055	Plod1	3580.28	3910.3	3630.6	3540.81	2970.44	3533.11	3222.77	3443.55	3478.98	-0.144537	0.0673469	-2.14616	0.0318604	0.22648
ENSMUSG00000019066	Rab3d	440.125	457.311	440.561	480.753	500.082	525.928	458.383	470.482	471.703	0.0940513	0.0826733	1.13763	0.255277	0.616223
ENSMUSG00000019080	Mfsd3	69.3347	111.916	104.219	70.8163	82.9463	67.6194	89.9429	70.3119	83.3882	-0.129053	0.134009	-0.963017	0.335539	0.68589
ENSMUSG00000019082	Slc25a22	143.694	147.613	141.169	134.651	96.1697	130.543	159.296	148.436	137.696	-0.0596375	0.121768	-0.489762	0.624302	0.865812
ENSMUSG00000019087	Atp6ap1	7545.43	7436.62	7682.81	7650.15	6134.42	6764.75	6683.95	6273.38	7021.44	-0.220195	0.0545722	-4.03494	5.46173e-05	0.00431381
ENSMUSG00000019088	Dnase1l1	1484.17	1276.42	1524.43	1423.31	1408.89	1170.19	1183.34	1192.7	1332.93	-0.187231	0.0789968	-2.37011	0.0177829	0.166117
ENSMUSG00000019102	Aldh3a1	4.0194	1.92958	1.89488	12.9664	8.41485	2.81747	4.3346	6.94438	5.41519	0.0125674	0.0882538	0.142401	0.886763	NA
ENSMUSG00000019122	Ccl9	3861.64	3416.33	4272.96	4454.44	4518.77	3558.47	4006.25	3519.07	3950.99	-0.0331119	0.0876625	-0.37772	0.705639	0.901855
ENSMUSG00000019124	Scrn1	24.1164	15.4367	9.47442	17.9534	4.80848	15.9657	17.3384	30.3817	16.9344	0.0144242	0.120599	0.119605	0.904796	NA
ENSMUSG00000019132	BC005537	761.677	690.791	818.59	642.333	622.699	629.236	665.36	681.417	689.013	-0.147669	0.0842007	-1.75378	0.0794684	0.357946
ENSMUSG00000019139	Isyna1	260.256	313.557	267.179	229.405	256.052	260.147	288.251	280.379	269.403	0.0163586	0.102258	0.159974	0.872902	0.966171
ENSMUSG00000019143	Hars2	209.009	240.233	261.494	197.488	182.722	221.641	210.228	189.234	214.006	-0.142788	0.108726	-1.31329	0.189085	0.543132
ENSMUSG00000019158	Tmem160	409.979	496.868	472.774	304.211	465.221	527.807	439.961	423.607	442.553	0.112759	0.110564	1.01985	0.307799	0.66878
ENSMUSG00000019173	Rab5c	243.174	162.085	229.281	261.322	263.265	279.869	302.338	280.379	252.714	0.262877	0.112313	2.34059	0.0192535	0.173881
ENSMUSG00000019179	Mdh2	1286.21	1276.42	1215.57	1098.15	1275.45	1505.47	1446.67	1303.81	1300.97	0.167044	0.0767438	2.17664	0.0295074	0.217394
ENSMUSG00000019188	H13	1038.01	1171.26	1006.18	993.423	1004.97	1197.43	1078.23	1082.46	1071.5	0.0483793	0.0775238	0.624057	0.53259	0.815551
ENSMUSG00000019189	Rnf145	1658	1695.14	1479.9	1466.2	1377.63	1432.22	1421.75	1384.54	1489.42	-0.154632	0.0687955	-2.2477	0.0245951	0.196826
ENSMUSG00000019194	Scn1b	167.81	260.494	261.494	246.361	272.881	260.147	293.669	329.858	261.589	0.239596	0.114443	2.09359	0.0362965	0.244398
ENSMUSG00000019210	Atp6v1e1	2373.46	2322.25	2397.98	2165.38	2573.74	2186.36	2278.91	2185.74	2310.48	-0.00594588	0.0691254	-0.0860159	0.931454	0.981602
ENSMUSG00000019214	Chtf18	24.1164	49.2044	36.9502	58.8473	52.8933	48.8362	43.346	56.4231	46.3271	0.12792	0.139074	0.919794	0.357681	NA
ENSMUSG00000019254	Ppp1r12c	1049.06	1666.2	1427.8	1813.3	1882.52	1625.68	1782.6	2160.57	1675.97	0.261626	0.109223	2.39534	0.0166048	0.159222
ENSMUSG00000019256	Ahr	281.358	284.614	342.974	367.048	252.445	346.549	269.829	302.949	305.971	-0.0974442	0.107819	-0.903773	0.366116	0.704382
ENSMUSG00000019261	Map1s	1030.98	1073.81	955.969	953.526	853.506	1162.68	1105.32	1282.97	1052.35	0.117732	0.0945738	1.24487	0.213179	0.573488
ENSMUSG00000019278	Dpep1	4.0194	1.92958	6.63209	13.9638	8.41485	6.5741	4.3346	2.60414	6.05907	-0.0373781	0.0932106	-0.401007	0.688415	NA
ENSMUSG00000019295	Tmem129	218.053	285.578	241.598	225.415	198.35	218.824	212.395	202.255	225.309	-0.184396	0.104847	-1.75871	0.0786263	0.355933
ENSMUSG00000019297	Nop9	227.096	327.065	235.913	260.325	254.85	307.105	237.319	264.755	264.303	0.0162129	0.110914	0.146175	0.883783	0.969156
ENSMUSG00000019302	Atp6v0a1	2454.85	2409.09	2523.99	2686.03	2300.86	2824.99	2822.91	2730.01	2594.09	0.0784534	0.0732078	1.07165	0.283876	0.645948
ENSMUSG00000019303	Psmc3ip	22.1067	27.0142	25.5809	21.9431	55.2976	31.9314	40.095	31.2497	31.9023	0.31964	0.138631	2.3057	0.0211276	NA
ENSMUSG00000019320	Noxo1	6.02911	3.85917	2.84233	6.98189	12.0212	9.39158	8.66919	8.68048	7.30937	0.174487	0.107745	1.61944	0.105352	NA
ENSMUSG00000019338	Zfp687	135.655	115.775	104.219	121.684	121.414	123.969	121.369	151.908	124.499	0.0942871	0.119998	0.78574	0.43202	0.75136
ENSMUSG00000019362	D8Ertd738e	638.08	611.678	551.411	534.613	699.634	725.03	633.935	596.349	623.841	0.163928	0.0867083	1.89057	0.0586811	0.312642
ENSMUSG00000019370	Calm3	522.523	511.34	502.144	477.76	721.273	643.323	601.425	557.287	567.134	0.287639	0.0867389	3.31615	0.000912674	0.0279238
ENSMUSG00000019373	Cops3	278.344	331.889	337.289	334.133	310.147	278.93	291.502	273.435	304.459	-0.133392	0.0953468	-1.39902	0.161806	0.508162
ENSMUSG00000019428	Fkbp8	1141.51	1236.86	1160.62	1188.92	1203.32	1182.4	1145.42	1195.3	1181.79	-0.00044227	0.0637728	-0.00693509	0.994467	0.9985
ENSMUSG00000019432	Ddx39b	584.823	578.875	593.099	636.349	653.954	751.326	620.931	619.786	629.893	0.131267	0.0826062	1.58907	0.112044	0.430046
ENSMUSG00000019433	Gipc1	781.774	814.285	701.107	561.543	782.581	761.657	749.885	693.57	730.8	0.0543163	0.0949996	0.571753	0.567489	0.834618
ENSMUSG00000019437	Tlcd1	6.02911	15.4367	18.9488	8.97671	15.6276	13.1482	13.0038	19.097	13.7835	0.0805069	0.123211	0.653406	0.513495	NA
ENSMUSG00000019461	Plscr3	469.265	488.185	449.088	387.993	429.157	489.301	454.049	475.69	455.341	0.0390128	0.0891095	0.437808	0.661526	0.885026
ENSMUSG00000019467	Arhgef25	3.01455	5.78875	6.63209	7.9793	7.21273	7.51326	7.58554	1.7361	5.93279	0.00248823	0.0973108	0.0255699	0.9796	NA
ENSMUSG00000019470	Xab2	516.493	517.129	505.934	503.693	383.477	542.833	467.053	499.995	492.076	-0.0924776	0.0931953	-0.992299	0.321052	0.675409
ENSMUSG00000019471	Cdc37	826.992	883.75	808.168	734.095	835.474	871.538	739.049	885.409	823.059	0.0320482	0.0812145	0.394612	0.693129	0.896896
ENSMUSG00000019487	Trip10	403.95	451.523	341.079	385.999	354.626	365.332	392.281	434.892	391.21	-0.0260041	0.0973459	-0.267131	0.789368	0.935932
ENSMUSG00000019494	Cops6	946.57	857.7	983.445	863.759	1163.65	974.846	1003.46	871.52	958.119	0.119892	0.0858705	1.3962	0.162654	0.508719
ENSMUSG00000019505	Ubb	4640.4	4689.85	5012.92	4385.62	5415.56	4272.23	4868.83	4744.75	4753.77	0.0397673	0.0730093	0.544688	0.585968	0.845116
ENSMUSG00000019518	Ap4m1	34.1649	26.0494	36.9502	29.9224	54.0954	24.4181	24.9239	27.7775	32.2877	0.0127877	0.137603	0.0929321	0.925957	NA
ENSMUSG00000019528	Gyg	872.211	809.461	739.005	882.71	766.953	727.847	694.619	716.139	776.118	-0.169468	0.0778776	-2.17608	0.0295492	0.217394
ENSMUSG00000019539	Rcn3	397.921	355.044	336.342	365.053	334.19	307.105	377.11	319.442	349.026	-0.106124	0.0937058	-1.13253	0.257414	0.618382
ENSMUSG00000019558	Slc6a8	262.266	182.346	242.545	276.283	192.339	225.398	197.224	242.185	227.573	-0.128808	0.114395	-1.126	0.260166	0.621608
ENSMUSG00000019564	Arid3a	186.902	149.543	214.122	208.459	228.403	199.101	223.232	287.324	212.136	0.236861	0.117099	2.02275	0.0430988	0.266709
ENSMUSG00000019578	Ubxn6	432.086	509.41	441.508	407.942	458.008	434.83	405.285	491.315	447.548	-0.000342902	0.0915238	-0.00374659	0.997011	0.998939
ENSMUSG00000019579	Mydgf	390.887	415.825	399.821	431.879	486.859	350.306	433.46	388.885	412.24	0.0124283	0.0963189	0.129033	0.897332	0.971337
ENSMUSG00000019590	Cyb561	1.00485	2.89438	7.57954	6.98189	12.0212	8.45242	13.0038	7.81243	7.46881	0.184035	0.103579	1.77675	0.0756092	NA
ENSMUSG00000019647	Sema6a	123.597	93.5848	69.1633	116.697	105.787	119.273	97.5284	138.888	108.065	0.133501	0.131697	1.01369	0.31073	0.670358
ENSMUSG00000019659	Ccdc12	706.41	623.256	532.462	563.538	746.517	586.034	627.433	653.64	629.911	0.0923769	0.0942756	0.979861	0.327155	0.680132
ENSMUSG00000019689	Fmc1	105.509	102.268	88.1121	81.7878	143.052	116.456	92.1102	118.054	105.919	0.220397	0.126697	1.73956	0.0819363	0.363964
ENSMUSG00000019699	Akt3	59.2862	55.9579	59.6889	60.8421	50.4891	63.8627	72.6045	54.687	59.6773	0.0228524	0.134311	0.170145	0.864896	0.965485
ENSMUSG00000019710	Mrpl24	227.096	219.973	220.754	237.384	191.137	217.885	238.403	232.637	223.159	-0.0314984	0.101569	-0.310117	0.756472	0.921969
ENSMUSG00000019715	Gle1	427.062	392.67	408.348	338.123	365.445	393.507	381.444	399.302	388.238	-0.0204051	0.0907159	-0.224934	0.822031	0.948189
ENSMUSG00000019718	L3hypdh	12.0582	19.2958	26.5284	10.9715	20.4361	8.45242	10.8365	17.361	15.7425	-0.0775808	0.124393	-0.623675	0.532841	NA
ENSMUSG00000019726	Lyst	57.2765	65.6059	57.794	73.8085	46.8827	63.8627	60.6843	58.1592	60.5092	-0.089779	0.134377	-0.668112	0.504062	0.797922
ENSMUSG00000019731	Slc35e1	350.693	558.615	534.357	601.44	586.635	473.336	542.908	645.827	536.726	0.107475	0.114149	0.941529	0.346434	0.693638
ENSMUSG00000019738	Polr2i	150.728	127.353	148.748	132.656	189.935	164.353	165.798	154.512	154.26	0.21117	0.112373	1.87919	0.0602189	0.31579
ENSMUSG00000019761	Krt10	25.1213	13.5071	16.1065	19.9482	27.6488	21.6006	15.1711	18.229	19.6666	0.0500454	0.133048	0.376145	0.706809	NA
ENSMUSG00000019763	Rmnd1	228.101	246.987	202.753	238.382	173.105	215.067	173.384	218.748	212.066	-0.183588	0.10838	-1.69392	0.0902802	0.383255
ENSMUSG00000019768	Esr1	24.1164	36.6621	18.0014	30.9198	27.6488	21.6006	34.6768	28.6456	27.7839	0.0145154	0.137338	0.105691	0.915827	NA
ENSMUSG00000019773	Fbxo5	28.1358	71.3946	30.3181	22.9405	43.2764	38.5055	36.8441	40.7982	39.0267	0.0239997	0.136706	0.175557	0.860642	NA
ENSMUSG00000019774	Mtrf1l	66.3202	51.134	46.4247	53.8603	62.5103	61.0453	60.6843	53.819	56.9747	0.0787071	0.13508	0.582671	0.560115	0.8314
ENSMUSG00000019777	Hdac2	629.037	611.678	624.364	603.434	611.88	547.529	541.824	537.322	588.384	-0.131205	0.0769817	-1.70437	0.0883125	0.37811
ENSMUSG00000019779	Frk	66.3202	82.0073	76.7428	76.8007	56.4997	53.532	60.6843	80.7284	69.1644	-0.16505	0.133402	-1.23724	0.215997	0.576762
ENSMUSG00000019782	Rwdd1	451.178	377.234	422.559	400.96	635.922	485.545	513.65	515.62	475.333	0.328692	0.0937542	3.50589	0.000455087	0.0180511
ENSMUSG00000019790	Stxbp5	521.518	656.059	628.154	865.754	729.687	600.122	678.364	883.673	695.416	0.0909661	0.113067	0.804535	0.421088	0.743427
ENSMUSG00000019791	Hint3	62.3008	62.7115	73.9005	62.837	70.9251	71.376	55.2661	68.5758	65.9866	0.0161342	0.132283	0.121968	0.902924	0.972869
ENSMUSG00000019792	Trmt11	123.597	101.303	147.801	110.713	135.84	113.638	96.4447	109.374	117.339	-0.0647955	0.125185	-0.517599	0.604738	0.854395
ENSMUSG00000019794	Katna1	397.921	422.579	460.457	424.898	460.412	427.317	456.216	397.566	430.921	0.0239501	0.0865242	0.276802	0.781932	0.933471
ENSMUSG00000019795	Pcmt1	932.502	905.94	977.76	869.743	910.006	871.538	923.269	930.547	915.163	-0.0188252	0.0695597	-0.270634	0.786673	0.935447
ENSMUSG00000019796	Lrp11	13.0631	21.2254	31.2656	12.9664	14.4255	7.51326	11.9201	22.5692	16.8686	-0.129223	0.124113	-1.04117	0.297798	NA
ENSMUSG00000019797	1700021F05Rik	181.878	156.296	166.75	144.625	180.318	170.927	190.722	184.026	171.943	0.130026	0.1086	1.19729	0.231192	0.59105
ENSMUSG00000019802	Sec63	808.905	891.468	897.228	931.583	946.069	867.782	910.265	859.367	889.083	0.0190399	0.0728242	0.261451	0.793745	0.937665
ENSMUSG00000019804	Snx3	5312.65	4876.06	5246.93	4630.98	5278.51	4723.02	5032.47	4876.69	4997.17	-0.0109338	0.0638748	-0.171175	0.864086	0.965346
ENSMUSG00000019806	Aig1	107.519	126.388	132.642	114.702	105.787	115.516	95.3611	94.6172	111.567	-0.170048	0.121084	-1.40439	0.160204	0.505693
ENSMUSG00000019808	Adat2	17.0825	10.6127	15.1591	10.9715	15.6276	13.1482	11.9201	10.4166	13.1173	-0.0239556	0.12588	-0.190305	0.84907	NA
ENSMUSG00000019809	Pex3	289.397	220.937	294.654	277.281	301.732	263.903	236.235	238.713	265.357	-0.0486896	0.106805	-0.455874	0.64848	0.877769
ENSMUSG00000019810	Fuca2	1904.19	1889.06	1620.13	1648.72	1720.24	1675.46	1725.17	1748.25	1741.4	-0.037153	0.0701623	-0.529529	0.596439	0.850005
ENSMUSG00000019813	Cep57l1	49.2377	47.2748	61.5837	45.881	62.5103	43.2013	47.6806	54.687	51.507	0.0134622	0.136986	0.0982743	0.921715	NA
ENSMUSG00000019814	Ltv1	609.945	581.77	603.521	497.709	518.114	540.016	593.84	576.384	565.162	-0.0363199	0.0854759	-0.424913	0.6709	0.888215
ENSMUSG00000019818	Cd164	3494.87	3195.39	3439.21	3244.58	3125.51	2817.47	3155.59	2960.91	3179.19	-0.141919	0.0619898	-2.28939	0.0220567	0.185745
ENSMUSG00000019820	Utrn	232.121	220.937	231.176	213.446	204.361	178.44	203.726	198.783	210.374	-0.164351	0.10116	-1.62467	0.104233	0.412897
ENSMUSG00000019822	Smpd2	235.135	203.571	157.275	182.526	163.488	186.892	133.289	170.137	179.039	-0.188594	0.1189	-1.58616	0.112703	0.431302
ENSMUSG00000019823	Mical1	420.028	465.995	367.608	404.949	411.125	484.605	393.365	384.545	416.527	0.0117902	0.0960313	0.122774	0.902286	0.972782
ENSMUSG00000019826	Zbtb24	131.635	109.986	112.746	101.736	76.9357	118.334	126.787	102.43	110.074	-0.0696803	0.127184	-0.54787	0.583781	0.844695
ENSMUSG00000019832	Rab32	2597.54	2238.32	2352.5	2321.98	2332.11	1976.93	2130.45	2035.57	2248.17	-0.155385	0.0709851	-2.18898	0.0285981	0.213396
ENSMUSG00000019837	Gtf3c6	304.47	325.135	304.129	263.317	390.689	352.184	346.768	364.58	331.409	0.243477	0.0929434	2.61963	0.0088025	0.110508
ENSMUSG00000019838	Slc16a10	139.674	67.5355	85.2698	94.7542	68.5209	88.2808	67.1862	94.6172	88.2299	-0.163966	0.136305	-1.20294	0.229	0.588951
ENSMUSG00000019841	Rev3l	120.582	77.1834	85.2698	72.8111	93.7654	91.0983	92.1102	73.7841	88.3255	-0.0155843	0.132069	-0.118001	0.906067	0.973884
ENSMUSG00000019842	Traf3ip2	6.02911	4.82396	8.52698	16.956	19.2339	15.9657	4.3346	26.0414	12.739	0.170591	0.11148	1.53024	0.125958	NA
ENSMUSG00000019843	Fyn	1101.32	1366.15	1241.15	1192.91	1145.62	1234.05	1239.69	1328.98	1231.23	0.0133091	0.0772533	0.172279	0.863218	0.965344
ENSMUSG00000019845	Tube1	17.0825	16.4015	17.054	22.9405	28.8509	22.5398	26.0076	17.361	21.0297	0.135947	0.135235	1.00527	0.314768	NA
ENSMUSG00000019846	Lama4	12.0582	15.4367	26.5284	51.8654	18.0318	27.2356	32.5095	6.07633	23.7177	-0.0816887	0.118665	-0.6884	0.491201	NA
ENSMUSG00000019849	Prep	734.546	832.616	793.009	816.881	806.623	802.98	778.06	810.757	796.934	0.00902867	0.0714704	0.126327	0.899473	0.971901
ENSMUSG00000019850	Tnfaip3	1728.34	2191.04	1832.35	2277.09	2007.54	1837.93	2208.48	2096.34	2022.39	0.0192184	0.086333	0.222608	0.82384	0.948523
ENSMUSG00000019853	Hebp2	39.1892	33.7677	29.3707	25.9327	25.2445	23.4789	27.0912	25.1734	28.6561	-0.160103	0.138709	-1.15423	0.248405	NA
ENSMUSG00000019854	Reps1	100.485	209.36	154.433	388.991	378.668	158.718	345.684	287.324	252.958	0.113961	0.12063	0.944717	0.344803	0.691912
ENSMUSG00000019857	Asf1a	193.936	177.522	180.961	179.534	204.361	177.501	218.897	174.478	188.399	0.0642382	0.107336	0.598476	0.549522	0.826191
ENSMUSG00000019861	Gopc	434.096	389.776	420.664	492.722	458.008	358.758	365.19	433.156	419.046	-0.0906718	0.0976644	-0.928402	0.353199	0.697526
ENSMUSG00000019863	Qrsl1	84.4075	103.233	117.483	84.78	114.201	84.5242	108.365	105.034	100.253	0.0523594	0.127322	0.411236	0.6809	0.891921
ENSMUSG00000019864	Rtn4ip1	75.3638	103.233	92.8493	74.8059	69.723	64.8019	81.2737	56.4231	77.3092	-0.231631	0.13229	-1.75093	0.0799572	0.358883
ENSMUSG00000019866	Aim1	122.592	131.212	167.697	197.488	152.669	118.334	145.209	121.527	144.591	-0.148745	0.12544	-1.18578	0.235709	0.595317
ENSMUSG00000019868	Vta1	492.377	469.854	500.249	494.716	527.731	418.864	484.391	388.017	472.025	-0.0958005	0.093308	-1.02671	0.304556	0.665467
ENSMUSG00000019872	Smpdl3a	2397.57	2198.76	2264.39	2457.62	2124.15	1914	1893.13	1846.34	2137	-0.245386	0.0669348	-3.66605	0.000246328	0.0117975
ENSMUSG00000019873	Reep3	2139.33	1873.63	1906.25	1757.44	1762.31	2007.92	1895.3	1790.78	1891.62	-0.0385516	0.0731421	-0.527079	0.598139	0.850805
ENSMUSG00000019876	Pkib	893.313	686.932	820.485	624.38	809.027	653.654	675.113	631.071	724.247	-0.109456	0.100542	-1.08866	0.276303	0.639709
ENSMUSG00000019877	Serinc1	4247.51	4032.83	4509.82	4029.55	3844.38	3824.25	3749.43	3377.57	3951.92	-0.17477	0.0647177	-2.70049	0.00692365	0.0962045
ENSMUSG00000019878	Hsf2	24.1164	22.1902	25.5809	20.9457	14.4255	22.5398	15.1711	20.8331	20.7253	-0.129386	0.135514	-0.954785	0.339687	NA
ENSMUSG00000019883	Echdc1	40.194	30.8733	32.213	39.8965	20.4361	31.9314	37.9277	37.326	33.8498	-0.0741028	0.138969	-0.533232	0.593873	NA
ENSMUSG00000019897	Ccdc59	290.402	152.437	204.647	230.402	236.818	225.398	208.061	237.845	223.251	0.0371546	0.1218	0.305046	0.760331	0.9234
ENSMUSG00000019899	Lama2	6.02911	2.89438	6.63209	25.9327	12.0212	14.0874	6.50189	4.34024	9.80488	-0.0256704	0.0995647	-0.257826	0.796541	NA
ENSMUSG00000019907	Ppp1r12a	165.8	174.627	198.015	200.48	195.946	152.144	161.464	163.193	176.459	-0.112149	0.111051	-1.00989	0.31255	0.670735
ENSMUSG00000019916	P4ha1	1424.88	1410.53	1301.79	1424.3	1295.89	1315.76	1458.59	1398.42	1378.77	-0.022348	0.0674005	-0.33157	0.740214	0.917406
ENSMUSG00000019917	2010-09-01	178.863	148.578	134.537	138.64	156.276	155.9	130.038	125.867	146.087	-0.0627631	0.117896	-0.532359	0.594477	0.848803
ENSMUSG00000019920	Lims1	2089.09	1933.44	2289.97	1941.96	1995.52	1972.23	2016.67	1812.48	2006.42	-0.0771361	0.0708298	-1.08903	0.276139	0.639495
ENSMUSG00000019923	Zwint	420.028	445.734	413.085	407.942	415.934	404.777	419.372	388.017	414.361	-0.0474547	0.0829037	-0.572407	0.567046	0.834612
ENSMUSG00000019927	Ube2d1	312.509	237.339	239.703	245.363	284.903	261.086	227.566	228.297	254.596	-0.0397209	0.107605	-0.369136	0.712026	0.905265
ENSMUSG00000019929	Dcn	522.523	807.531	1040.29	2123.49	764.549	1057.49	1027.3	657.112	1000.04	-0.0980312	0.124119	-0.789817	0.429635	0.75112
ENSMUSG00000019942	Cdk1	161.781	233.48	168.645	167.565	301.732	234.789	234.068	269.963	221.503	0.395248	0.11504	3.43576	0.000590893	0.0216276
ENSMUSG00000019943	Atp2b1	4585.14	4387.87	5416.53	4725.74	4795.26	4817.88	4712.79	4539.89	4747.64	-0.0178751	0.0685546	-0.260743	0.79429	0.938063
ENSMUSG00000019944	Rhobtb1	247.193	304.874	309.814	310.195	276.488	317.435	287.167	288.192	292.67	-0.00212095	0.0982335	-0.0215909	0.982774	0.995153
ENSMUSG00000019947	Arid5b	164.796	155.332	196.121	131.658	108.191	120.212	96.4447	141.492	139.281	-0.340694	0.123967	-2.74826	0.00599126	0.0880022
ENSMUSG00000019948	Actr6	82.3978	67.5355	101.376	79.793	94.9676	82.6459	53.0988	62.4994	78.0393	-0.111305	0.135265	-0.82287	0.410582	0.736887
ENSMUSG00000019951	Uhrf1bp1l	741.58	828.756	772.165	803.914	777.772	752.265	746.634	819.437	780.316	-0.0210224	0.0729075	-0.288344	0.773083	0.929829
ENSMUSG00000019952	Poc1b	344.664	379.163	363.818	337.125	310.147	330.584	339.182	311.629	339.539	-0.125609	0.0888625	-1.41352	0.157503	0.501566
ENSMUSG00000019960	Dusp6	1883.09	1540.77	1593.6	1440.26	1087.92	1093.18	999.124	1160.58	1349.82	-0.516461	0.0825414	-6.257	3.92458e-10	4.41711e-07
ENSMUSG00000019961	Tmpo	594.872	788.235	609.205	761.026	784.985	901.592	795.398	855.895	761.401	0.243601	0.0923163	2.63877	0.00832078	0.10687
ENSMUSG00000019966	Kitl	123.597	116.74	131.694	124.677	128.627	86.4025	97.5284	118.054	115.915	-0.153704	0.122956	-1.25007	0.211276	0.56973
ENSMUSG00000019969	Psen1	1722.31	1984.58	1670.34	1671.66	1667.34	1651.98	1832.45	1679.67	1735.04	-0.0421577	0.0722599	-0.583418	0.559612	0.831339
ENSMUSG00000019970	Sgk1	3091.93	2521.97	2332.6	2519.46	2276.82	2223.93	2282.16	2528.62	2472.19	-0.152434	0.0810172	-1.8815	0.0599044	0.315235
ENSMUSG00000019971	Cep290	78.3784	51.134	90.007	63.8344	63.7124	54.4712	56.3497	65.1036	65.3738	-0.147385	0.135758	-1.08565	0.277636	0.640693
ENSMUSG00000019975	Ikbip	194.941	189.099	204.647	217.436	192.339	214.128	215.646	203.123	203.92	0.029427	0.102298	0.287658	0.773609	0.930081
ENSMUSG00000019977	Hbs1l	420.028	447.664	486.038	429.885	425.551	480.849	526.653	530.377	468.38	0.123861	0.0896349	1.38184	0.167021	0.514987
ENSMUSG00000019978	Epb41l2	1637.91	1765.57	1579.39	1629.77	1574.78	1408.74	1620.06	1684.88	1612.64	-0.0674118	0.0710982	-0.94815	0.343053	0.690709
ENSMUSG00000019979	Apaf1	363.756	318.381	293.707	372.035	286.105	300.531	301.254	304.685	317.557	-0.15066	0.0958996	-1.57102	0.116179	0.438421
ENSMUSG00000019984	Med23	157.762	183.311	177.172	193.498	181.52	171.866	183.137	177.95	178.277	0.00354612	0.106498	0.0332976	0.973437	0.99262
ENSMUSG00000019986	Ahi1	51.2474	48.2396	36.0028	45.881	70.9251	50.7145	58.517	61.6314	52.8949	0.243785	0.136633	1.78423	0.0743861	NA
ENSMUSG00000019987	Arg1	37.1795	22.1902	38.8451	57.8499	84.1485	14.0874	10.8365	10.4166	34.4442	-0.0434291	0.0874045	-0.496875	0.619277	NA
ENSMUSG00000019988	Nedd1	318.538	320.311	313.603	288.252	292.115	279.869	361.939	299.476	309.263	-0.00853121	0.0973978	-0.0875914	0.930201	0.980857
ENSMUSG00000019990	Pde7b	15.0728	15.4367	43.5823	21.9431	12.0212	13.1482	10.8365	7.81243	17.4816	-0.311667	0.125002	-2.49329	0.0126566	NA
ENSMUSG00000019992	Mtfr2	18.0873	11.5775	9.47442	17.9534	20.4361	20.6615	27.0912	13.0207	17.2878	0.158759	0.129501	1.22593	0.220226	NA
ENSMUSG00000019996	Map7	17.0825	14.4719	24.6335	15.9586	18.0318	27.2356	9.75284	13.8888	17.6319	-0.0196365	0.128672	-0.152609	0.878707	NA
ENSMUSG00000019997	Ctgf	273.32	219.008	398.873	245.363	252.445	88.2808	293.669	181.422	244.048	-0.155596	0.130305	-1.19409	0.232443	0.591733
ENSMUSG00000019998	Stx7	2904.02	2839.38	2988.23	2708.97	2806.95	2510.37	2636.52	2410.57	2725.63	-0.135122	0.065085	-2.07608	0.0378864	0.250715
ENSMUSG00000020003	Pex7	492.377	487.22	560.886	520.649	477.242	466.761	474.638	396.698	484.559	-0.165197	0.0874672	-1.88867	0.0589361	0.313074
ENSMUSG00000020009	Ifngr1	3244.66	3135.57	3004.34	3024.15	3162.78	2547	2698.29	2572.89	2923.71	-0.164119	0.0728208	-2.25374	0.0242125	0.195349
ENSMUSG00000020015	Cdk17	565.731	602.995	555.201	523.641	568.603	586.974	576.501	526.037	563.21	0.00521581	0.0796876	0.0654532	0.947813	0.985887
ENSMUSG00000020018	Snrpf	104.505	89.7257	80.5326	86.7749	152.669	93.9158	128.954	93.7491	103.853	0.246359	0.130708	1.88481	0.0594559	0.314351
ENSMUSG00000020019	Ntn4	14.0679	4.82396	14.2116	34.9094	0	7.51326	14.0874	13.8888	12.9378	-0.139846	0.100778	-1.38767	0.165239	NA
ENSMUSG00000020021	Fgd6	243.174	227.691	275.706	279.275	179.116	188.771	217.813	282.115	236.708	-0.183212	0.116167	-1.57714	0.114762	0.435265
ENSMUSG00000020022	Ndufa12	402.945	368.551	380.872	363.058	579.422	420.743	412.87	422.739	418.9	0.230751	0.100791	2.2894	0.022056	0.185745
ENSMUSG00000020023	Tmcc3	402.945	377.234	266.231	313.187	288.509	277.052	265.494	299.476	311.266	-0.215901	0.108086	-1.99749	0.0457719	0.275304
ENSMUSG00000020024	Cep83	252.218	285.578	283.285	245.363	277.69	294.896	274.163	284.72	274.739	0.0741515	0.0951941	0.77895	0.436009	0.753806
ENSMUSG00000020027	Socs2	3.01455	0.964792	5.68465	24.9353	8.41485	15.0265	15.1711	6.94438	10.0195	0.0532911	0.0947509	0.562434	0.57382	NA
ENSMUSG00000020029	Nudt4	534.581	700.439	642.366	631.362	593.848	615.148	612.262	698.778	628.598	0.00682113	0.0887133	0.0768896	0.938711	0.983983
ENSMUSG00000020032	Nuak1	84.4075	46.31	40.74	44.8836	63.7124	58.2278	40.095	59.0272	54.6754	0.0173915	0.139008	0.125112	0.900435	0.972066
ENSMUSG00000020034	Tcp11l2	1700.21	1797.41	2010.47	1925.01	1619.26	1479.17	1426.08	1396.69	1669.29	-0.304581	0.0730623	-4.16878	3.0623e-05	0.00293329
ENSMUSG00000020038	Cry1	363.756	419.685	331.605	397.967	313.754	401.02	417.205	279.511	365.563	-0.0814279	0.109634	-0.742726	0.457648	0.769498
ENSMUSG00000020042	Btbd11	36.1746	30.8733	54.9516	69.8189	30.053	68.5585	35.7604	58.1592	48.0437	0.00743932	0.137937	0.0539329	0.956989	NA
ENSMUSG00000020044	Timp3	18.0873	28.9438	62.5312	56.8525	18.0318	34.7488	59.6007	18.229	37.1281	-0.107989	0.128273	-0.841865	0.399864	NA
ENSMUSG00000020048	Hsp90b1	5260.4	5090.24	5374.84	4815.51	4550.03	4361.45	4901.34	4519.06	4859.11	-0.156122	0.0607149	-2.5714	0.0101289	0.120636
ENSMUSG00000020053	Igf1	2342.31	2151.49	2375.24	2374.84	1997.93	2024.82	2283.25	2099.81	2206.21	-0.128915	0.0657949	-1.95935	0.0500713	0.28762
ENSMUSG00000020056	Ccdc53	320.548	297.156	297.497	255.338	318.562	308.983	303.422	281.247	297.844	0.0418295	0.0959582	0.435914	0.662899	0.885439
ENSMUSG00000020057	Dram1	308.489	281.719	344.869	320.169	347.413	293.956	337.015	317.705	318.917	0.0376621	0.0950534	0.396221	0.691942	0.896728
ENSMUSG00000020063	Sirt1	69.3347	103.233	92.8493	213.446	221.19	80.7676	185.304	130.207	137.041	0.096498	0.12275	0.786137	0.431787	0.75136
ENSMUSG00000020064	Herc4	909.39	757.362	829.012	807.904	697.23	671.498	723.877	722.216	764.811	-0.21162	0.0767685	-2.7566	0.00584057	0.0873564
ENSMUSG00000020069	Hnrnph3	64.3105	85.8665	95.6916	90.7645	75.7336	96.7333	75.8554	94.6172	84.9466	0.021519	0.130478	0.164924	0.869004	0.965573
ENSMUSG00000020070	Rufy2	224.082	208.395	178.119	185.519	137.042	166.231	185.304	162.325	180.877	-0.229115	0.112084	-2.04413	0.0409405	0.259781
ENSMUSG00000020074	Ccar1	892.308	886.644	881.121	873.733	863.123	829.276	824.657	834.194	860.632	-0.0723697	0.0663228	-1.09117	0.275197	0.638627
ENSMUSG00000020075	Ddx21	428.067	484.326	465.194	438.861	409.923	536.259	576.501	615.446	494.322	0.201387	0.10041	2.00565	0.0448932	0.272936
ENSMUSG00000020076	Ddx50	440.125	490.114	484.143	424.898	405.115	463.944	454.049	531.245	461.704	0.0129202	0.0920465	0.140366	0.888371	0.969798
ENSMUSG00000020077	Srgn	9154.19	6947.47	7978.41	8481	9549.65	8861.89	8396.11	8294.2	8457.86	0.0989903	0.0780335	1.26856	0.204598	0.561974
ENSMUSG00000020078	Vps26a	3417.5	3210.83	3443	3232.61	3071.42	2943.32	3127.41	3150.14	3199.53	-0.109153	0.0568267	-1.9208	0.0547566	0.299896
ENSMUSG00000020079	Supv3l1	106.514	134.106	113.693	119.689	100.978	84.5242	91.0265	93.7491	105.535	-0.266078	0.121905	-2.18267	0.0290602	0.21589
ENSMUSG00000020085	Aifm2	270.305	310.663	226.439	273.291	262.062	238.546	249.239	302.949	266.687	-0.0294177	0.106252	-0.276867	0.781882	0.933471
ENSMUSG00000020087	Tysnd1	268.295	310.663	320.235	238.382	238.02	330.584	276.33	339.407	290.239	0.0497191	0.111205	0.447094	0.654807	0.880508
ENSMUSG00000020088	Sar1a	1671.07	1839.86	1939.41	1763.42	1667.34	1782.52	1740.34	1626.72	1753.84	-0.0768008	0.0670279	-1.1458	0.251877	0.613443
ENSMUSG00000020089	Ppa1	94.456	105.162	120.325	100.739	98.5739	126.786	118.118	123.263	110.928	0.114029	0.121886	0.93554	0.34951	0.695547
ENSMUSG00000020091	Eif4ebp2	61.2959	56.9227	72.953	50.868	40.8721	42.2621	33.5931	27.7775	48.3181	-0.41872	0.138062	-3.03285	0.00242254	NA
ENSMUSG00000020092	Pald1	2139.33	2548.02	1813.4	1816.29	1781.54	2248.34	2247.49	2430.53	2128.12	0.0570233	0.0986988	0.577751	0.563432	0.832372
ENSMUSG00000020097	Sgpl1	9052.7	9539.87	9426.1	9193.15	8550.69	9179.33	9641.22	9147.49	9216.32	-0.0259216	0.0553487	-0.468333	0.639546	0.873158
ENSMUSG00000020100	Slc29a3	570.755	571.157	579.835	558.551	512.104	573.825	575.418	601.557	567.9	-0.00799078	0.078353	-0.101984	0.918769	0.978569
ENSMUSG00000020101	Vsir	4181.19	4241.23	3576.59	4201.1	3755.43	4005.51	3828.53	3914.89	3963.06	-0.0592655	0.0659527	-0.898606	0.368862	0.705791
ENSMUSG00000020102	Slc16a7	449.168	413.896	447.193	408.939	406.317	325.888	312.091	352.427	389.49	-0.263258	0.0930704	-2.82859	0.00467539	0.077544
ENSMUSG00000020105	Lrig3	16.0776	27.0142	25.5809	22.9405	19.2339	18.7832	31.4258	24.3053	23.1702	0.0122871	0.135931	0.090392	0.927976	NA
ENSMUSG00000020107	Anapc16	336.625	277.86	324.973	326.154	347.413	332.462	324.011	334.198	325.462	0.0701379	0.0918417	0.763682	0.445056	0.759388
ENSMUSG00000020109	Dnajb12	77.3735	120.599	129.8	118.692	123.818	122.091	109.449	134.547	117.046	0.0952222	0.126517	0.752641	0.451666	0.766286
ENSMUSG00000020111	Micu1	926.473	1022.68	955.022	827.852	834.272	939.158	874.505	855.027	904.373	-0.0831076	0.0783137	-1.06121	0.288593	0.651577
ENSMUSG00000020114	Cand1	791.823	959.003	811.01	849.795	846.293	856.512	965.531	953.116	879.136	0.0785967	0.0804713	0.976706	0.328715	0.681075
ENSMUSG00000020115	Tbk1	1121.41	1043.91	1050.71	1065.24	919.623	833.972	944.942	985.234	995.63	-0.200848	0.0722615	-2.77945	0.00544503	0.0835839
ENSMUSG00000020116	Pno1	442.134	344.431	439.613	342.112	453.2	415.108	417.205	442.704	412.063	0.119911	0.0968159	1.23855	0.215514	0.576303
ENSMUSG00000020120	Plek	14187.5	14358	15413.9	14949.2	13041.8	13681.7	16496.4	14147.4	14534.5	-0.0355609	0.0711649	-0.499697	0.617288	0.862874
ENSMUSG00000020122	Egfr	182.883	214.184	274.758	287.255	194.744	218.824	245.988	215.276	229.239	-0.102114	0.116803	-0.874243	0.381986	0.716692
ENSMUSG00000020124	Usp15	890.298	884.714	901.017	753.046	887.165	665.863	870.17	752.597	825.609	-0.0990945	0.0911987	-1.08658	0.277224	0.640693
ENSMUSG00000020128	Vps54	306.48	422.579	374.24	617.398	621.497	348.428	501.729	598.953	473.913	0.134327	0.139074	0.96587	0.334109	0.685389
ENSMUSG00000020130	Tbc1d15	976.715	944.532	1110.4	1179.94	866.729	919.436	901.596	824.645	965.499	-0.237527	0.081156	-2.92679	0.00342478	0.0651543
ENSMUSG00000020131	Pcsk4	11.0534	15.4367	9.47442	9.97412	16.8297	20.6615	8.66919	14.7568	13.357	0.113359	0.12441	0.911178	0.362202	NA
ENSMUSG00000020132	Rab21	87.422	121.564	129.8	324.159	326.977	122.091	275.247	200.519	198.472	0.111826	0.117806	0.949234	0.342502	0.690215
ENSMUSG00000020133	2310011J03Rik	293.417	334.783	316.446	286.257	421.944	334.34	340.266	364.58	336.504	0.210254	0.0964292	2.1804	0.029228	0.216422
ENSMUSG00000020134	Peli1	1551.49	1591.91	1824.77	1594.86	1554.34	1651.04	1727.34	1841.13	1667.11	0.0427231	0.0741547	0.576135	0.564524	0.832976
ENSMUSG00000020137	Thap2	41.1989	35.6973	26.5284	53.8603	36.0636	27.2356	50.9315	35.59	38.3882	-0.0341837	0.13878	-0.246316	0.805438	NA
ENSMUSG00000020142	Slc1a4	2.0097	5.78875	15.1591	10.9715	10.8191	1.87832	7.58554	6.07633	7.53604	-0.0550666	0.097184	-0.566622	0.570971	NA
ENSMUSG00000020143	Dock2	2644.77	2291.38	2299.44	2773.8	2288.84	2355.41	2509.73	2651.02	2476.8	-0.0267805	0.0763119	-0.350935	0.725637	0.911495
ENSMUSG00000020149	Rab1a	5080.53	4743.88	5361.57	4753.67	4843.35	4198.97	4708.45	4206.56	4737.12	-0.141816	0.0683401	-2.07515	0.0379725	0.250715
ENSMUSG00000020150	Gamt	80.3881	87.7961	90.9544	68.8214	69.723	51.6537	50.9315	43.4024	67.9588	-0.3875	0.134279	-2.88578	0.00390448	0.0713103
ENSMUSG00000020152	Actr2	1672.07	1461.66	1624.86	1655.7	2014.75	1589.06	2217.15	2295.99	1816.41	0.29786	0.0913742	3.25978	0.00111498	0.0309853
ENSMUSG00000020153	Ndufs7	786.798	851.911	812.905	722.126	926.835	805.797	873.421	820.305	825.013	0.0993483	0.0775824	1.28055	0.200351	0.557029
ENSMUSG00000020156	Mum1	330.596	427.403	344.869	340.118	316.158	272.356	251.407	337.671	327.572	-0.242029	0.1051	-2.30286	0.021287	0.183414
ENSMUSG00000020160	Meis1	16.0776	22.1902	17.054	26.9301	8.41485	7.51326	15.1711	24.3053	17.2071	-0.15794	0.125915	-1.25434	0.209719	NA
ENSMUSG00000020163	Uqcr11	673.25	708.157	648.998	648.318	1109.56	758.84	810.569	728.292	760.748	0.290624	0.100989	2.87778	0.00400479	0.0721183
ENSMUSG00000020166	Cnot2	653.153	557.65	569.413	539.6	510.901	476.153	583.003	501.732	548.951	-0.145676	0.0879204	-1.65691	0.0975385	0.399599
ENSMUSG00000020167	Tcf3	390.887	448.628	357.186	339.12	381.072	387.872	369.524	422.739	387.129	0.021636	0.0956167	0.226279	0.820985	0.947961
ENSMUSG00000020170	Frs2	161.781	184.275	189.488	221.426	200.754	262.025	271.996	246.526	217.284	0.301433	0.111335	2.70745	0.00678018	0.0949436
ENSMUSG00000020171	Yeats4	247.193	201.642	228.334	218.433	358.232	293.956	275.247	304.685	265.965	0.383751	0.102569	3.7414	0.000182998	0.00941552
ENSMUSG00000020176	Grb10	0	0.964792	18.0014	29.9224	4.80848	2.81747	9.75284	7.81243	9.25997	-0.042118	0.0579431	-0.726886	0.467296	NA
ENSMUSG00000020180	Snrpd3	343.659	245.057	292.76	287.255	464.019	357.819	386.863	354.163	341.449	0.343898	0.105456	3.26105	0.00111002	0.030943
ENSMUSG00000020184	Mdm2	1258.07	1297.65	1458.11	1433.28	1298.29	1241.57	1314.47	1263.01	1320.56	-0.0846141	0.06953	-1.21694	0.223626	0.585929
ENSMUSG00000020185	E2f7	21.1019	27.979	23.6861	26.9301	20.4361	21.6006	24.9239	29.5136	24.5214	-0.017223	0.137598	-0.125169	0.90039	NA
ENSMUSG00000020186	Csrp2	25.1213	34.7325	36.0028	39.8965	37.2658	43.2013	32.5095	32.1178	35.1059	0.047572	0.139078	0.342054	0.73231	NA
ENSMUSG00000020189	Osbpl8	629.037	604.925	814.8	773.992	645.539	530.624	672.946	679.681	668.943	-0.135464	0.0990885	-1.3671	0.171593	0.521086
ENSMUSG00000020190	Mknk2	490.367	641.587	656.577	818.875	680.4	765.414	773.725	943.568	721.314	0.226018	0.109773	2.05896	0.039498	0.254849
ENSMUSG00000020191	4930415F15Rik	9.04366	20.2606	15.1591	8.97671	22.8403	30.0531	20.5893	17.361	18.0355	0.242164	0.129898	1.86426	0.0622852	NA
ENSMUSG00000020193	Zpbp	9.04366	11.5775	15.1591	5.98447	1.20212	8.45242	9.75284	8.68048	8.73157	-0.100694	0.107642	-0.935452	0.349556	NA
ENSMUSG00000020196	Cabin1	460.222	430.297	439.613	466.789	486.859	446.1	457.3	506.072	461.656	0.0706454	0.0824491	0.856836	0.391535	0.722768
ENSMUSG00000020198	Ap3d1	873.216	992.771	877.331	937.567	811.432	947.61	931.938	1046.87	927.341	0.0218827	0.0821796	0.266279	0.790024	0.936176
ENSMUSG00000020205	Phlda1	34.1649	21.2254	36.0028	34.9094	39.67	52.5928	45.5133	24.3053	36.048	0.160568	0.138434	1.15989	0.246093	NA
ENSMUSG00000020211	Sf3a2	92.4463	93.5848	86.2172	103.731	93.7654	148.387	124.62	133.679	109.554	0.299831	0.12572	2.38492	0.0170828	0.161062
ENSMUSG00000020212	Mdm1	167.81	164.015	150.643	142.63	296.924	283.626	279.581	338.539	227.971	0.782706	0.103947	7.52987	5.07906e-14	1.1433e-10
ENSMUSG00000020219	Timm13	503.43	559.579	520.146	459.807	665.975	555.981	561.33	576.384	550.329	0.183127	0.0869509	2.1061	0.0351956	0.241909
ENSMUSG00000020220	Vps13d	123.597	150.508	126.01	126.671	120.212	121.151	102.947	128.471	124.946	-0.117344	0.118199	-0.992768	0.320823	0.675256
ENSMUSG00000020224	Llph	301.455	258.564	302.234	283.265	346.211	306.165	319.676	343.747	307.665	0.173456	0.0936116	1.85294	0.0638912	0.323982
ENSMUSG00000020225	Tmbim4	787.803	756.397	825.222	837.826	935.25	840.546	885.341	821.173	836.195	0.108102	0.0735701	1.46937	0.141733	0.4814
ENSMUSG00000020227	Irak3	406.965	421.614	388.451	382.009	382.274	338.097	343.517	362.844	378.221	-0.147731	0.086631	-1.70529	0.0881411	0.37811
ENSMUSG00000020228	Helb	124.602	89.7257	102.324	101.736	84.1485	79.8284	83.441	52.9509	89.8445	-0.321858	0.131411	-2.44924	0.0143157	0.146243
ENSMUSG00000020230	Prmt2	706.41	804.637	678.369	683.227	659.964	618.905	799.733	678.813	703.757	-0.0530718	0.0881754	-0.60189	0.547248	0.825018
ENSMUSG00000020231	Dip2a	176.854	186.205	201.805	219.431	251.243	209.432	276.33	304.685	228.248	0.327805	0.111498	2.94001	0.00328198	0.0636874
ENSMUSG00000020232	Hmg20b	139.674	136.036	126.957	97.7464	177.914	162.474	130.038	153.644	140.561	0.236957	0.120837	1.96096	0.0498839	0.287524
ENSMUSG00000020234	4930404N11Rik	24.1164	23.155	26.5284	28.925	20.4361	30.0531	20.5893	39.0621	26.6082	0.0494036	0.137247	0.35996	0.718877	NA
ENSMUSG00000020235	Fzr1	587.838	683.073	676.474	579.497	558.986	631.114	646.938	679.681	630.45	-0.00382074	0.0858898	-0.0444842	0.964518	0.990818
ENSMUSG00000020238	Ncln	540.61	616.502	568.465	547.579	637.124	558.799	519.068	552.946	567.637	-0.0046433	0.0841087	-0.0552059	0.955974	0.988612
ENSMUSG00000020241	Col6a2	67.325	80.0778	126.01	306.206	60.1061	169.988	132.205	51.2148	124.141	-0.077954	0.102246	-0.76242	0.44581	0.760097
ENSMUSG00000020246	Hcfc2	213.028	201.642	150.643	156.594	151.467	179.379	209.144	170.137	179.004	-0.0170985	0.118707	-0.144039	0.88547	0.969429
ENSMUSG00000020248	Nfyb	275.329	283.649	256.757	225.415	236.818	209.432	273.08	217.012	247.186	-0.128896	0.105816	-1.21812	0.22318	0.585929
ENSMUSG00000020250	Txnrd1	1516.32	1858.19	1666.55	1738.49	1563.96	1625.68	1760.93	1699.64	1678.72	-0.0255346	0.0730908	-0.349354	0.726823	0.912354
ENSMUSG00000020253	Ppm1m	263.271	287.508	206.542	219.431	215.18	254.512	230.817	217.012	236.784	-0.0721759	0.109035	-0.66195	0.508003	0.801342
ENSMUSG00000020255	D10Wsu102e	462.232	508.445	469.931	563.538	524.125	469.579	497.395	505.204	500.056	-0.00574139	0.0857473	-0.0669571	0.946616	0.985868
ENSMUSG00000020257	Wdr82	214.033	156.296	183.804	183.524	245.233	147.448	218.897	234.373	197.951	0.145103	0.121662	1.19268	0.232996	0.592054
ENSMUSG00000020260	Pofut2	775.745	841.299	815.748	740.08	721.273	697.794	747.718	769.09	763.593	-0.10321	0.0742558	-1.38993	0.16455	0.510722
ENSMUSG00000020261	Slc36a1	72.3493	72.3594	68.2158	97.7464	100.978	74.1935	69.3535	78.9923	79.2736	0.0355114	0.132309	0.268397	0.788394	0.93573
ENSMUSG00000020262	Adarb1	151.733	140.86	130.747	184.521	187.531	164.353	170.133	208.331	167.276	0.206686	0.116361	1.77625	0.0756923	0.349684
ENSMUSG00000020263	Appl2	818.954	872.172	898.175	956.518	771.762	744.752	836.577	767.354	833.283	-0.170409	0.0750739	-2.26989	0.0232144	0.191384
ENSMUSG00000020265	Sumo3	1459.04	1561.03	1458.11	1414.33	1621.66	1470.72	1470.51	1353.29	1476.09	0.00406203	0.070375	0.0577197	0.953972	0.98776
ENSMUSG00000020267	Hint1	1249.03	1141.35	1259.15	990.43	1562.76	1614.41	1430.42	1453.98	1337.69	0.349866	0.0804246	4.35023	1.35996e-05	0.00177465
ENSMUSG00000020268	Lyrm7	10.0485	7.71834	4.73721	11.9689	2.40424	9.39158	8.66919	11.2846	8.27783	-0.0164727	0.10765	-0.153021	0.878382	NA
ENSMUSG00000020271	Fbxw11	1278.17	1543.67	1373.79	1310.6	1297.09	1258.47	1364.31	1284.71	1338.85	-0.075774	0.0727092	-1.04215	0.297341	0.661052
ENSMUSG00000020272	Stk10	439.12	480.467	324.025	472.773	527.731	478.971	609.011	683.154	501.906	0.340571	0.110112	3.09294	0.00198182	0.0451754
ENSMUSG00000020273	Papolg	111.538	102.268	126.957	113.705	80.5421	77.9501	100.779	83.3326	99.6341	-0.296774	0.12423	-2.38891	0.0168983	0.160217
ENSMUSG00000020275	Rel	1009.88	968.651	1148.3	1235.79	1030.22	1088.48	1123.74	1164.92	1096.25	0.014008	0.0819187	0.170999	0.864224	0.965346
ENSMUSG00000020277	Pfkl	668.226	540.284	565.623	573.512	480.848	509.024	561.33	553.814	556.583	-0.138632	0.0871188	-1.5913	0.111542	0.429016
ENSMUSG00000020280	Pus10	218.053	210.325	193.278	180.532	158.68	192.527	206.977	170.137	191.314	-0.111959	0.109345	-1.0239	0.30588	0.667007
ENSMUSG00000020282	Rhbdf1	838.046	933.919	863.12	794.938	670.784	846.181	903.763	892.353	842.888	-0.0427052	0.0893251	-0.478087	0.632589	0.870789
ENSMUSG00000020283	Pex13	386.868	357.938	387.504	398.965	397.902	355.002	419.372	376.733	385.035	0.0130334	0.0878993	0.148276	0.882125	0.968642
ENSMUSG00000020284	1810043G02Rik	144.699	137	147.801	197.488	168.297	152.144	160.38	157.117	158.116	0.0185623	0.116351	0.159537	0.873246	0.966171
ENSMUSG00000020287	Mpg	52.2523	61.7467	47.3721	63.8344	50.4891	74.1935	75.8554	71.1799	62.1154	0.171344	0.135199	1.26735	0.205032	0.562065
ENSMUSG00000020288	Ahsa2	222.072	225.761	206.542	187.513	194.744	184.075	241.654	198.783	207.643	-0.0334816	0.107902	-0.310297	0.756335	0.921969
ENSMUSG00000020289	Nprl3	120.582	116.74	130.747	119.689	132.233	135.239	122.452	106.77	123.057	0.0173509	0.117797	0.147295	0.882899	0.968994
ENSMUSG00000020290	Xpo1	634.061	747.714	675.526	737.088	623.901	694.977	719.543	732.632	695.68	-0.00956819	0.0815534	-0.117324	0.906603	0.973889
ENSMUSG00000020300	Cpeb4	485.343	431.262	554.254	682.23	508.497	509.963	480.056	553.814	525.677	-0.0564995	0.104759	-0.539326	0.589662	0.84636
ENSMUSG00000020305	Asb3	203.985	178.487	179.067	173.55	194.744	190.649	189.639	144.096	181.777	-0.0286761	0.111993	-0.256053	0.79791	0.94061
ENSMUSG00000020307	Cdc34	80.3881	102.268	99.4814	105.726	157.478	112.699	104.03	121.527	110.45	0.2472	0.126332	1.95675	0.0503764	0.288035
ENSMUSG00000020308	Tpgs1	228.101	275.931	259.599	221.426	276.488	217.885	201.559	225.692	238.335	-0.0812933	0.108135	-0.751776	0.452186	0.766286
ENSMUSG00000020309	Chac2	39.1892	37.6269	30.3181	32.9146	42.0742	34.7488	41.1787	39.9302	37.2476	0.0909117	0.138796	0.655	0.512468	NA
ENSMUSG00000020311	Erlec1	71.3444	69.465	88.1121	74.8059	81.7442	78.8893	82.3573	77.2562	77.9968	0.0512096	0.128309	0.399111	0.689812	0.895768
ENSMUSG00000020315	Sptbn1	1001.84	916.553	919.966	1140.04	1037.43	1011.47	1119.41	1171	1039.71	0.11393	0.0821232	1.38731	0.165347	0.511819
ENSMUSG00000020319	Wdpcp	164.796	119.634	95.6916	128.666	123.818	108.003	121.369	119.791	122.721	-0.07491	0.125912	-0.594941	0.551883	0.827744
ENSMUSG00000020321	Mdh1	2409.63	2603.01	2407.45	2051.68	2558.11	2406.12	2514.07	2348.94	2412.38	0.0486767	0.073325	0.663848	0.506787	0.799985
ENSMUSG00000020326	Ccng1	741.58	711.052	759.849	756.038	756.134	617.966	776.976	728.292	730.986	-0.0412233	0.0812198	-0.507552	0.611767	0.858935
ENSMUSG00000020328	Nudcd2	272.315	246.022	286.128	199.482	244.031	285.504	288.251	302.949	265.585	0.131387	0.107773	1.2191	0.222804	0.585617
ENSMUSG00000020329	Polrmt	269.3	219.008	219.807	193.498	221.19	198.162	250.323	232.637	225.491	0.000542506	0.109153	0.00497013	0.996034	0.998683
ENSMUSG00000020330	Hmmr	84.4075	115.775	83.3749	90.7645	176.712	140.874	130.038	153.644	121.949	0.495541	0.123712	4.00559	6.18634e-05	0.00444339
ENSMUSG00000020334	Slc22a4	10.0485	13.5071	16.1065	28.925	18.0318	14.0874	9.75284	13.8888	15.5435	-0.0854077	0.125386	-0.68116	0.49577	NA
ENSMUSG00000020340	Cyfip2	50.2426	58.8523	59.6889	119.689	56.4997	63.8627	70.4372	72.048	68.9151	-0.0691939	0.138828	-0.498413	0.618193	0.863052
ENSMUSG00000020346	Mgat1	1787.63	2038.61	1930.89	1890.1	1803.18	2022.01	1894.22	1865.43	1904.01	-0.0107884	0.0657205	-0.164156	0.869608	0.965573
ENSMUSG00000020349	Ppp2ca	3048.72	3807.07	3898.72	3799.14	3815.53	3331.19	3593.38	3261.26	3569.38	-0.0512766	0.0796244	-0.643982	0.519587	0.810106
ENSMUSG00000020358	Hnrnpab	1711.26	2055.97	1954.57	1782.38	1943.83	1925.27	2052.43	2259.53	1960.66	0.114902	0.0756877	1.51811	0.128986	0.460138
ENSMUSG00000020359	Phykpl	133.645	124.458	123.167	126.671	173.105	127.725	117.034	143.228	133.629	0.105983	0.119415	0.887518	0.3748	0.710046
ENSMUSG00000020361	Hspa4	1452.01	1575.51	1442.95	1358.48	1436.53	1568.39	1717.58	1583.32	1516.85	0.105424	0.0725167	1.45378	0.146006	0.487262
ENSMUSG00000020362	Cnot6	430.076	530.636	528.673	578.499	610.677	539.077	549.41	580.724	543.471	0.123008	0.0905168	1.35895	0.174162	0.524336
ENSMUSG00000020363	Gfpt2	98.4754	82.0073	81.48	198.485	55.2976	100.49	99.6957	25.1734	92.638	-0.154777	0.114995	-1.34595	0.178317	0.529891
ENSMUSG00000020366	Mapk9	566.736	552.826	474.668	616.401	543.359	622.662	685.95	578.12	580.09	0.120035	0.0921745	1.30226	0.192827	0.547879
ENSMUSG00000020368	Canx	4979.04	4716.87	5377.68	5151.63	4958.75	4316.37	5268.7	5065.93	4979.37	-0.0416887	0.0702448	-0.593477	0.552862	0.828047
ENSMUSG00000020372	Rack1	949.584	1007.24	1131.25	1014.37	1220.15	1029.32	1143.25	1064.23	1069.92	0.107775	0.0776802	1.38742	0.165314	0.511819
ENSMUSG00000020375	Rufy1	682.294	798.848	648.998	706.168	615.486	670.559	685.95	808.152	702.057	-0.023455	0.0902271	-0.259956	0.794898	0.938305
ENSMUSG00000020376	Rnf130	2357.38	2738.08	2740	2897.48	2968.04	2413.64	2586.67	2691.82	2674.14	-0.00948175	0.0773584	-0.122569	0.902448	0.972782
ENSMUSG00000020377	Ltc4s	1635.9	1578.4	1424.01	1177.94	1888.53	1620.99	1679.66	1922.73	1616.02	0.255559	0.0900595	2.83766	0.00454453	0.0772073
ENSMUSG00000020380	Rad50	326.577	330.924	318.341	311.193	305.339	335.279	290.418	298.608	314.585	-0.0571487	0.0905778	-0.630935	0.528083	0.813492
ENSMUSG00000020381	3010026O09Rik	14.0679	11.5775	13.2642	9.97412	22.8403	21.6006	13.0038	19.097	15.6782	0.206087	0.129887	1.58667	0.112588	NA
ENSMUSG00000020385	Clk4	852.114	679.214	775.008	758.033	706.847	679.011	681.615	649.3	722.643	-0.158389	0.0803861	-1.97035	0.0487986	0.285309
ENSMUSG00000020386	Sar1b	645.114	533.53	635.734	533.616	586.635	551.286	617.68	578.988	585.323	-0.00804536	0.0859675	-0.0935861	0.925438	0.979686
ENSMUSG00000020387	Jade2	37.1795	31.8381	39.7926	42.8887	31.2551	34.7488	26.0076	23.4373	33.3935	-0.195269	0.139065	-1.40416	0.160272	NA
ENSMUSG00000020388	Pdlim4	780.769	942.602	883.963	811.894	1071.09	949.489	918.934	991.31	918.756	0.18229	0.0793088	2.29848	0.0215345	0.183962
ENSMUSG00000020389	Cdkl3	50.2426	46.31	47.3721	53.8603	27.6488	73.2543	62.8516	66.8397	53.5474	0.121195	0.13899	0.871966	0.383227	NA
ENSMUSG00000020390	Ube2b	765.697	706.228	781.64	779.976	913.612	691.22	836.577	665.793	767.593	0.0277269	0.0921771	0.300801	0.763566	0.92518
ENSMUSG00000020392	Cdkn2aipnl	588.843	623.256	564.675	544.587	647.943	584.156	521.235	511.28	573.247	-0.0337317	0.0877898	-0.384232	0.700806	0.899792
ENSMUSG00000020393	Kremen1	252.218	241.198	262.441	343.11	282.498	359.697	344.6	314.233	300	0.200022	0.108029	1.85156	0.0640888	0.324188
ENSMUSG00000020397	Med7	170.825	171.733	173.382	191.503	204.361	167.17	180.969	176.214	179.52	0.0319559	0.107056	0.298496	0.765325	0.925776
ENSMUSG00000020399	Havcr2	2676.92	2785.36	2165.85	2443.66	2267.2	2245.53	2243.15	2318.56	2393.28	-0.138413	0.0749782	-1.84604	0.0648871	0.326393
ENSMUSG00000020400	Tnip1	258.247	267.247	212.227	237.384	260.86	293.956	268.745	297.74	262.051	0.173377	0.100167	1.73087	0.0834751	0.367715
ENSMUSG00000020402	Vdac1	908.385	650.27	837.539	584.484	913.612	674.315	1044.64	1003.46	827.088	0.224388	0.114562	1.95866	0.0501532	0.28763
ENSMUSG00000020409	Slu7	890.298	799.813	772.165	743.072	673.188	738.178	821.406	753.465	773.948	-0.0915546	0.0820135	-1.11634	0.264279	0.62505
ENSMUSG00000020412	Ascc2	361.746	340.572	393.188	402.955	354.626	409.473	361.939	437.496	382.749	0.0563601	0.0940571	0.599212	0.549031	0.826191
ENSMUSG00000020413	Hus1	40.194	35.6973	37.8977	64.8318	52.8933	46.0187	49.8478	50.3468	47.2159	0.0848242	0.138585	0.612076	0.540488	NA
ENSMUSG00000020415	Pttg1	392.897	376.269	398.873	374.03	360.636	366.272	334.847	395.83	374.957	-0.0703919	0.0873394	-0.805959	0.420267	0.742992
ENSMUSG00000020420	Zfp607a	53.2571	32.8029	49.267	55.8551	52.8933	50.7145	45.5133	67.7077	51.0014	0.10503	0.138153	0.760246	0.447107	NA
ENSMUSG00000020422	Tns3	496.396	422.579	459.509	527.631	430.359	483.666	474.638	559.891	481.834	0.0304745	0.0940612	0.323986	0.745948	0.918643
ENSMUSG00000020423	Btg2	1588.67	1804.16	1717.71	1570.92	1694.99	1875.5	1665.57	1882.8	1725.04	0.0857239	0.0712844	1.20256	0.229146	0.588989
ENSMUSG00000020424	Gatsl3	73.3541	50.1692	54.0042	42.8887	44.4785	63.8627	53.0988	39.0621	52.6148	-0.0744867	0.13839	-0.538238	0.590412	NA
ENSMUSG00000020427	Igfbp3	18.0873	9.64792	9.47442	36.9043	15.6276	4.69579	52.0151	6.07633	19.0661	0.0069443	0.0799686	0.0868378	0.9308	NA
ENSMUSG00000020430	Pes1	660.187	687.897	628.154	595.455	714.06	676.194	698.954	644.959	663.232	0.0795373	0.0771418	1.03105	0.302516	0.663967
ENSMUSG00000020432	Tcn2	4811.23	4484.35	4691.73	4646.94	3341.9	3743.48	3694.16	3838.51	4156.54	-0.332143	0.0605463	-5.48577	4.1168e-08	2.64769e-05
ENSMUSG00000020437	Myo1g	1181.7	1388.34	1079.14	1136.05	1013.39	1198.37	1144.33	1080.72	1152.75	-0.0976262	0.0833957	-1.17064	0.241744	0.601954
ENSMUSG00000020439	Smtn	87.422	147.613	82.4275	60.8421	91.3612	105.186	97.5284	124.131	99.5639	0.0866024	0.136959	0.632324	0.527175	0.81251
ENSMUSG00000020440	Arf5	634.061	772.799	684.053	652.308	869.133	807.676	737.965	719.612	734.701	0.170753	0.0850279	2.0082	0.0446216	0.271836
ENSMUSG00000020441	2310033P09Rik	128.621	87.7961	98.534	77.7982	100.978	124.908	130.038	106.77	106.93	0.164035	0.128681	1.27474	0.2024	0.559192
ENSMUSG00000020444	Guk1	311.504	290.402	286.128	256.335	360.636	300.531	313.175	276.907	299.452	0.105725	0.0997043	1.06039	0.288968	0.65177
ENSMUSG00000020448	Rnf185	604.92	734.207	697.317	737.088	628.709	699.673	750.969	658.848	688.966	-0.0165288	0.0845843	-0.195412	0.845071	0.958494
ENSMUSG00000020451	Limk2	160.776	182.346	167.697	173.55	146.659	117.395	162.547	158.853	158.728	-0.177833	0.114266	-1.55631	0.119635	0.444269
ENSMUSG00000020453	Patz1	82.3978	80.0778	67.2684	65.8292	55.2976	85.4634	82.3573	113.714	79.0507	0.122794	0.135374	0.90707	0.36437	0.703835
ENSMUSG00000020454	Eif4enif1	145.703	148.578	157.275	173.55	230.807	149.326	203.726	195.311	175.535	0.241514	0.116826	2.0673	0.0387054	0.253273
ENSMUSG00000020455	Trim11	236.14	213.219	216.964	217.436	198.35	208.493	202.642	196.179	211.178	-0.112784	0.0999067	-1.12889	0.258942	0.620249
ENSMUSG00000020456	Ogdh	2782.43	3054.53	2780.74	2655.11	2341.73	2653.12	2580.17	2689.21	2692.13	-0.126171	0.0672519	-1.8761	0.0606418	0.316872
ENSMUSG00000020457	Drg1	917.429	808.496	985.34	805.909	948.473	854.634	828.991	776.035	865.663	-0.0422305	0.0849759	-0.496971	0.619209	0.863052
ENSMUSG00000020458	Rtn4	620.998	587.558	664.157	781.971	817.442	652.715	823.573	746.521	711.867	0.168833	0.0939901	1.79629	0.0724484	0.34268
ENSMUSG00000020459	Mtif2	203.985	151.472	170.54	216.438	159.882	175.623	208.061	227.428	189.179	0.0448333	0.118806	0.377367	0.705901	0.901934
ENSMUSG00000020460	Rps27a	587.838	440.91	503.092	505.688	780.177	623.601	576.501	532.113	568.74	0.250156	0.103559	2.41559	0.0157099	0.154724
ENSMUSG00000020462	Cfap36	219.058	202.606	242.545	246.361	248.839	253.573	232.985	275.171	240.142	0.128531	0.101385	1.26775	0.204886	0.562065
ENSMUSG00000020463	Smek2	920.444	956.109	1111.35	943.552	996.558	885.626	1008.88	983.498	975.752	-0.0200837	0.0783857	-0.256217	0.797784	0.940585
ENSMUSG00000020464	Pnpt1	316.528	351.184	333.5	350.092	336.594	261.086	307.756	280.379	317.14	-0.166217	0.0961105	-1.72944	0.0837302	0.367968
ENSMUSG00000020467	Efemp1	10.0485	11.5775	8.52698	28.925	6.01061	8.45242	3.25095	1.7361	9.816	-0.2653	0.106131	-2.49975	0.012428	NA
ENSMUSG00000020471	Pold2	91.4415	84.9017	61.5837	67.824	87.7548	118.334	66.1026	72.916	81.3573	0.108073	0.135637	0.796776	0.425581	0.747257
ENSMUSG00000020472	Zkscan17	185.897	196.818	177.172	209.457	229.605	209.432	252.49	223.956	210.603	0.207775	0.103675	2.0041	0.0450599	0.273099
ENSMUSG00000020473	Aebp1	14.0679	21.2254	28.4233	41.8913	12.0212	27.2356	32.5095	6.94438	23.0398	-0.114295	0.123251	-0.92734	0.35375	NA
ENSMUSG00000020474	Polm	84.4075	92.62	74.8479	72.8111	67.3188	75.1326	60.6843	72.916	75.0923	-0.155829	0.130073	-1.19801	0.230913	0.59105
ENSMUSG00000020475	Pgam2	4.0194	6.75355	9.47442	17.9534	14.4255	13.1482	19.5057	13.8888	12.3961	0.159036	0.118666	1.3402	0.18018	NA
ENSMUSG00000020476	Dbnl	1410.81	1443.33	1406	1312.59	1258.62	1309.19	1311.22	1364.57	1352.04	-0.0821991	0.0641263	-1.28183	0.199901	0.556387
ENSMUSG00000020477	Mrps24	252.218	309.698	287.075	248.356	408.721	328.705	382.528	315.969	316.659	0.320921	0.102713	3.12445	0.00178136	0.0418781
ENSMUSG00000020482	Ccdc117	398.926	459.241	395.083	385.999	407.519	412.29	446.463	416.663	415.273	0.0334405	0.0870688	0.38407	0.700927	0.899792
ENSMUSG00000020483	Dynll2	104.505	109.022	118.43	101.736	150.265	108.942	173.384	149.304	126.948	0.306931	0.123382	2.48764	0.0128592	0.13813
ENSMUSG00000020484	Xbp1	2820.62	2701.42	2932.33	2616.21	2602.59	2512.25	2731.88	2545.12	2682.8	-0.0869912	0.0612301	-1.42073	0.155397	0.500449
ENSMUSG00000020485	Supt4a	365.766	357.938	360.028	328.149	413.53	317.435	346.768	335.934	353.193	-0.00192927	0.0948478	-0.0203407	0.983772	0.995596
ENSMUSG00000020491	2810021J22Rik	12.0582	9.64792	11.3693	13.9638	18.0318	12.2091	5.41824	13.8888	12.0734	0.0184935	0.121127	0.152679	0.878652	NA
ENSMUSG00000020492	Ska2	45.2183	54.9932	58.7414	44.8836	63.7124	55.4103	61.768	46.0065	53.8417	0.0869394	0.136376	0.6375	0.523799	0.810863
ENSMUSG00000020493	Prr11	13.0631	17.3663	10.4219	12.9664	21.6382	17.844	31.4258	20.8331	18.1948	0.25965	0.132082	1.96583	0.0493184	NA
ENSMUSG00000020495	Smg8	252.218	270.142	263.389	197.488	200.754	227.276	253.574	215.276	235.015	-0.107886	0.108529	-0.994074	0.320187	0.675256
ENSMUSG00000020496	Rnf187	1087.25	1338.17	1259.15	993.423	1006.18	1256.59	1193.1	1252.59	1173.31	0.0089912	0.0919212	0.0978143	0.92208	0.979635
ENSMUSG00000020513	Tubd1	39.1892	59.8171	54.9516	40.8939	49.287	45.0796	49.8478	52.0829	48.8936	0.00504036	0.137571	0.0366383	0.970773	NA
ENSMUSG00000020514	Mrpl22	161.781	120.599	101.376	97.7464	152.669	123.03	118.118	131.075	125.799	0.0861884	0.127388	0.676583	0.49867	0.796304
ENSMUSG00000020515	Cnot8	958.628	872.172	846.066	899.666	879.953	821.763	786.729	805.548	858.816	-0.11055	0.0727936	-1.51868	0.128843	0.459994
ENSMUSG00000020516	Rps6kb1	371.795	351.184	398.873	350.092	311.349	345.61	367.357	377.601	359.233	-0.0595123	0.0916325	-0.649467	0.516037	0.806473
ENSMUSG00000020519	Sap30l	62.3008	91.6553	72.953	97.7464	127.425	98.6116	94.2775	131.075	97.0056	0.317019	0.131088	2.41837	0.0155901	0.153918
ENSMUSG00000020520	Galnt10	783.784	921.377	755.111	828.85	775.368	795.467	985.037	861.971	838.371	0.0493567	0.0872248	0.565857	0.571491	0.837447
ENSMUSG00000020521	Rnft1	857.138	879.89	850.803	830.844	822.251	830.216	926.52	856.763	856.803	0.00659669	0.0706008	0.0934365	0.925557	0.979686
ENSMUSG00000020522	Mfap3	820.963	757.362	881.121	751.051	836.676	813.311	762.889	802.944	803.29	0.00181423	0.076094	0.0238419	0.980979	0.994474
ENSMUSG00000020523	Fam114a2	541.615	596.242	485.09	563.538	611.88	582.278	508.231	574.648	557.94	0.0521565	0.0865889	0.602346	0.546944	0.824905
ENSMUSG00000020525	Ppm1d	214.033	226.726	255.809	200.48	183.925	245.12	248.156	229.165	225.427	0.0141326	0.108819	0.129873	0.896667	0.971337
ENSMUSG00000020526	Znhit3	53.2571	54.0284	47.3721	52.8628	64.9145	44.1404	58.517	41.6663	52.0948	-2.89229e-05	0.137056	-0.00021103	0.999832	NA
ENSMUSG00000020527	Myo19	8.03881	8.68313	14.2116	12.9664	2.40424	19.7223	14.0874	19.097	12.4014	0.077111	0.114582	0.672975	0.500963	NA
ENSMUSG00000020528	Prpsap2	178.863	191.029	198.015	191.503	195.946	226.337	198.308	185.762	195.72	0.0718134	0.104654	0.686201	0.492587	0.793234
ENSMUSG00000020530	Ggnbp2	1299.27	1201.17	1228.83	1143.03	1291.08	1136.38	1156.25	1140.61	1199.58	-0.0425449	0.070997	-0.599249	0.549007	0.826191
ENSMUSG00000020532	Acaca	43.2086	50.1692	61.5837	66.8266	33.6594	36.6272	59.6007	58.1592	51.2293	-0.123811	0.138791	-0.892067	0.372357	NA
ENSMUSG00000020534	Shmt1	56.2717	62.7115	60.6363	63.8344	67.3188	58.2278	49.8478	49.4787	58.5409	-0.0758593	0.134437	-0.564273	0.572568	0.837732
ENSMUSG00000020536	Llgl1	510.464	569.227	545.727	500.701	512.104	551.286	601.425	599.821	548.844	0.0831095	0.0832467	0.998352	0.318109	0.673647
ENSMUSG00000020537	Drg2	333.611	363.727	395.083	365.053	298.126	355.941	303.422	300.344	339.413	-0.183785	0.09383	-1.95871	0.0501472	0.28763
ENSMUSG00000020538	Srebf1	693.347	718.77	727.636	722.126	566.199	801.102	700.037	782.979	714.025	-0.00253041	0.0917616	-0.0275759	0.978	0.993896
ENSMUSG00000020541	Tom1l1	27.131	9.64792	30.3181	13.9638	25.2445	25.3573	22.7566	14.7568	21.147	0.0359202	0.129635	0.277088	0.781712	NA
ENSMUSG00000020544	Cox11	27.131	24.1198	23.6861	28.925	33.6594	22.5398	35.7604	19.9651	26.9733	0.0400938	0.137659	0.291256	0.770856	NA
ENSMUSG00000020546	Stxbp4	32.1552	23.155	29.3707	21.9431	19.2339	27.2356	30.3422	23.4373	25.8591	-0.0368011	0.137712	-0.267232	0.78929	NA
ENSMUSG00000020547	Bzw2	209.009	184.275	247.282	190.506	213.978	231.033	221.064	221.352	214.812	0.0781047	0.106344	0.734451	0.462674	0.77261
ENSMUSG00000020549	Elac2	311.504	275.931	216.017	253.343	232.009	244.181	227.566	236.977	249.691	-0.136928	0.105974	-1.29209	0.196327	0.551734
ENSMUSG00000020553	Pctp	245.184	208.395	216.964	194.495	197.148	226.337	206.977	208.331	212.979	-0.0352279	0.104011	-0.338694	0.734841	0.915251
ENSMUSG00000020561	Twistnb	286.383	264.353	326.868	292.242	284.903	276.112	300.171	284.72	289.469	-0.0266159	0.0951768	-0.279647	0.779748	0.932989
ENSMUSG00000020564	Atxn7l1	323.562	260.494	269.074	313.187	242.828	258.268	261.159	270.831	274.926	-0.146739	0.0989836	-1.48246	0.138217	0.477373
ENSMUSG00000020570	Sypl	2134.3	1730.84	2043.63	1921.02	1924.6	1781.58	1762.01	1685.75	1872.97	-0.120752	0.074293	-1.62535	0.104088	0.412897
ENSMUSG00000020571	Pdia6	2470.93	2406.19	2489.88	2141.44	1978.69	1839.81	2004.75	1983.49	2164.4	-0.267278	0.0668412	-3.99871	6.36891e-05	0.00444339
ENSMUSG00000020572	Nampt	1218.88	981.194	1149.25	1162.98	1002.57	925.07	961.197	881.068	1035.28	-0.237581	0.0786872	-3.0193	0.00253358	0.0532999
ENSMUSG00000020573	Pik3cg	2041.86	1885.2	1806.77	2201.29	1520.68	1788.16	1861.71	1909.7	1876.92	-0.148032	0.0811641	-1.82386	0.0681733	0.334878
ENSMUSG00000020576	Nbas	149.723	109.022	90.007	173.55	139.446	120.212	135.456	165.797	135.402	0.0704406	0.131261	0.536645	0.591513	0.847429
ENSMUSG00000020577	Tspan13	178.863	183.311	230.228	207.462	200.754	176.562	198.308	138.02	189.188	-0.132132	0.116518	-1.134	0.256794	0.61776
ENSMUSG00000020580	Rock2	920.444	1237.83	1204.2	1311.6	1161.25	1063.13	1176.84	1233.5	1163.6	-0.0107958	0.0909947	-0.118643	0.905559	0.973716
ENSMUSG00000020585	Laptm4a	4058.59	3308.27	4076.84	3331.36	3896.07	3485.21	3811.19	3556.39	3690.49	-0.00263366	0.0782063	-0.0336758	0.973136	0.99262
ENSMUSG00000020589	Fam49a	691.338	777.623	722.898	773.992	603.465	564.434	657.775	595.481	673.376	-0.268264	0.0784403	-3.41997	0.000626284	0.0222888
ENSMUSG00000020590	Snx13	1031.98	979.264	1086.72	1025.34	1015.79	848.06	1004.54	948.776	992.559	-0.103833	0.075235	-1.38011	0.167553	0.515207
ENSMUSG00000020592	Sdc1	25.1213	22.1902	29.3707	28.925	22.8403	29.1139	31.4258	13.0207	25.251	-0.0552844	0.135962	-0.406616	0.68429	NA
ENSMUSG00000020593	Lpin1	511.469	503.622	545.727	581.491	436.37	465.822	408.536	425.343	484.797	-0.272078	0.0839189	-3.24215	0.00118632	0.0322708
ENSMUSG00000020594	Pum2	153.742	120.599	193.278	138.64	126.223	147.448	160.38	133.679	146.749	-0.069791	0.122685	-0.568862	0.56945	0.835613
ENSMUSG00000020604	Arsg	139.674	176.557	166.75	182.526	132.233	151.204	118.118	145.832	151.612	-0.216085	0.115882	-1.86469	0.0622244	0.320337
ENSMUSG00000020605	Hs1bp3	232.121	172.698	161.065	169.56	137.042	186.892	159.296	174.478	174.144	-0.118297	0.118741	-0.996259	0.319124	0.674858
ENSMUSG00000020608	Smc6	688.323	644.481	692.58	611.414	711.656	701.551	783.478	722.216	694.462	0.13408	0.0765336	1.75191	0.079789	0.358692
ENSMUSG00000020610	Amz2	229.106	201.642	196.121	223.42	229.605	190.649	200.475	191.839	207.857	-0.0570857	0.10468	-0.545337	0.585521	0.844856
ENSMUSG00000020611	Gna13	3454.68	3759.8	3604.07	3800.14	3579.92	3715.31	3783.02	4094.58	3723.94	0.0512607	0.0623758	0.821804	0.411189	0.737148
ENSMUSG00000020612	Prkar1a	5945.7	5465.55	5675.18	5199.51	5431.18	5952.38	5841.95	5478.25	5623.71	0.0254811	0.0616258	0.413482	0.679254	0.891415
ENSMUSG00000020614	Fam20a	267.29	205.501	216.964	222.423	189.935	282.687	217.813	279.511	235.266	0.0738976	0.115459	0.640033	0.522151	0.810279
ENSMUSG00000020621	Rdh14	268.295	210.325	257.704	232.397	192.339	273.295	232.985	241.317	238.582	-0.0316081	0.109227	-0.289381	0.77229	0.929738
ENSMUSG00000020623	Map2k6	38.1843	32.8029	54.9516	48.8732	51.6912	31.9314	49.8478	44.2704	44.0691	0.00842853	0.138952	0.0606577	0.951632	NA
ENSMUSG00000020628	Trappc12	430.076	535.46	455.72	463.797	364.243	426.378	412.87	409.718	437.283	-0.196341	0.0902286	-2.17604	0.0295525	0.217394
ENSMUSG00000020629	Adi1	371.795	347.325	321.183	371.037	345.009	295.835	281.749	249.998	322.991	-0.229913	0.100123	-2.29632	0.0216577	0.184375
ENSMUSG00000020630	Rnaseh1	152.737	141.824	169.592	135.648	123.818	117.395	147.376	105.034	136.678	-0.21701	0.119117	-1.82181	0.0684832	0.334904
ENSMUSG00000020634	Ubxn2a	347.678	315.487	341.079	326.154	343.807	285.504	308.84	335.934	325.56	-0.0554912	0.0925066	-0.599862	0.548598	0.826016
ENSMUSG00000020635	Fkbp1b	348.683	280.755	303.181	330.143	485.657	331.523	341.349	309.025	341.29	0.169339	0.112035	1.51148	0.130665	0.463408
ENSMUSG00000020638	Cmpk2	86.4172	93.5848	85.2698	84.78	58.9039	72.3152	85.6083	172.741	92.4526	0.0850794	0.138977	0.612186	0.540415	0.820141
ENSMUSG00000020640	Itsn2	1124.43	1062.24	1155.88	1066.23	934.048	892.2	951.444	981.762	1021.03	-0.214893	0.0683033	-3.14615	0.00165434	0.0400519
ENSMUSG00000020641	Rsad2	100.485	98.4088	113.693	91.7619	75.7336	108.003	98.612	220.484	113.398	0.173799	0.138672	1.25331	0.210093	0.568295
ENSMUSG00000020644	Id2	2387.53	2128.33	2497.46	2170.37	2326.1	2131.89	2000.42	1834.18	2184.53	-0.135074	0.0788589	-1.71285	0.0867396	0.374223
ENSMUSG00000020647	Ncoa1	247.193	373.375	353.396	658.292	573.412	315.557	554.828	614.578	461.329	0.124992	0.134594	0.928658	0.353066	0.697457
ENSMUSG00000020648	Dus4l	9.04366	2.89438	4.73721	8.97671	16.8297	6.5741	11.9201	6.07633	8.38153	0.117959	0.106499	1.1076	0.268034	NA
ENSMUSG00000020649	Rrm2	270.305	451.523	318.341	299.224	607.071	572.886	507.148	527.773	444.284	0.579726	0.111155	5.21549	1.83333e-07	7.50332e-05
ENSMUSG00000020650	Bcap29	533.576	434.156	566.57	560.546	604.667	510.902	591.672	529.509	541.45	0.0808262	0.0928617	0.870394	0.384085	0.718339
ENSMUSG00000020652	Cenpo	117.568	111.916	82.4275	94.7542	94.9676	112.699	98.612	90.277	100.403	-0.0247743	0.126238	-0.196251	0.844414	0.958494
ENSMUSG00000020653	Klf11	602.911	591.418	653.735	577.502	551.774	551.286	520.151	504.336	569.139	-0.173608	0.0787757	-2.20382	0.0275367	0.209232
ENSMUSG00000020654	Adcy3	310.499	371.445	405.505	365.053	301.732	333.401	334.847	402.774	353.157	-0.0660963	0.101422	-0.651693	0.514599	0.805957
ENSMUSG00000020656	Grhl1	7.03396	2.89438	8.52698	3.98965	2.40424	6.5741	10.8365	8.68048	6.36753	0.0530286	0.0990079	0.535599	0.592236	NA
ENSMUSG00000020657	Dnajc27	67.325	63.6763	60.6363	96.749	50.4891	45.0796	71.5208	81.5965	67.1341	-0.117772	0.137824	-0.854512	0.392822	0.723306
ENSMUSG00000020659	Cbll1	184.893	185.24	188.541	218.433	177.914	157.779	199.391	185.762	187.244	-0.0889128	0.108279	-0.821146	0.411563	0.737242
ENSMUSG00000020661	Dnmt3a	384.858	420.649	387.504	413.926	379.87	364.393	332.68	446.176	391.257	-0.0647157	0.0946635	-0.683639	0.494203	0.794302
ENSMUSG00000020664	Dld	978.725	958.039	1077.24	925.599	937.654	1011.47	1033.8	1008.67	991.4	0.017955	0.0722846	0.248394	0.80383	0.942898
ENSMUSG00000020668	Kif3c	146.708	186.205	215.069	182.526	135.84	177.501	176.635	161.457	172.743	-0.126007	0.116866	-1.07822	0.280937	0.642672
ENSMUSG00000020669	Sh3yl1	25.1213	33.7677	12.3167	15.9586	31.2551	19.7223	20.5893	21.7012	22.554	0.0312559	0.132554	0.235797	0.81359	NA
ENSMUSG00000020671	Rab10	3798.34	3560.08	3736.71	3211.67	3231.3	3529.36	3383.15	3239.55	3461.27	-0.0903211	0.06654	-1.3574	0.174655	0.524869
ENSMUSG00000020674	Pxdn	2.0097	1.92958	0.947442	13.9638	14.4255	26.2964	7.58554	13.8888	10.1308	0.235681	0.098503	2.39262	0.0167284	NA
ENSMUSG00000020676	Ccl11	9.04366	5.78875	4.73721	24.9353	9.61697	13.1482	15.1711	4.34024	10.8477	-0.013767	0.105998	-0.12988	0.896661	NA
ENSMUSG00000020677	Ddx52	360.742	312.593	326.868	299.224	301.732	289.261	337.015	338.539	320.746	-0.0311566	0.0951831	-0.327333	0.743416	0.918128
ENSMUSG00000020680	Taf15	7.03396	3.85917	7.57954	7.9793	10.8191	6.5741	4.3346	1.7361	6.23948	-0.0293537	0.0978837	-0.299884	0.764266	NA
ENSMUSG00000020681	Ace	16.0776	9.64792	22.7386	86.7749	10.8191	21.6006	11.9201	14.7568	24.292	-0.241976	0.113379	-2.13422	0.0328251	NA
ENSMUSG00000020682	Mmp28	28.1358	28.9438	19.8963	18.9508	20.4361	18.7832	19.5057	21.7012	22.0441	-0.100818	0.136221	-0.740105	0.459237	NA
ENSMUSG00000020687	Cdc27	335.62	289.438	297.497	307.203	331.785	227.276	328.346	275.171	299.042	-0.0698443	0.106907	-0.653321	0.513549	0.805846
ENSMUSG00000020691	Mettl2	107.519	111.916	108.956	103.731	114.201	99.5507	117.034	93.7491	107.082	-0.0235986	0.120866	-0.195246	0.8452	0.958494
ENSMUSG00000020692	Nle1	19.0922	19.2958	20.8437	28.925	24.0424	31.9314	29.2585	30.3817	25.4713	0.171712	0.137784	1.24624	0.212675	NA
ENSMUSG00000020694	Tlk2	123.597	95.5144	113.693	122.682	108.191	138.995	139.791	111.978	119.305	0.0982975	0.122275	0.803907	0.421451	0.743737
ENSMUSG00000020695	Mrc2	15.0728	12.5423	10.4219	25.9327	0	12.2091	19.5057	8.68048	13.0456	-0.119342	0.108064	-1.10436	0.269435	NA
ENSMUSG00000020696	Rffl	371.795	389.776	339.184	382.009	338.998	399.142	409.619	388.017	377.318	0.0465502	0.0903329	0.515319	0.60633	0.855618
ENSMUSG00000020697	Lig3	90.4366	167.874	106.114	141.633	106.989	146.509	95.3611	126.735	122.706	-0.0554247	0.13285	-0.417196	0.676535	0.890301
ENSMUSG00000020700	Map3k3	542.62	914.623	720.056	960.508	797.006	864.964	808.402	914.922	815.388	0.0879323	0.111495	0.788666	0.430307	0.75112
ENSMUSG00000020705	Ddx42	615.974	627.115	648.05	614.406	525.327	631.114	584.087	659.716	613.224	-0.0531389	0.0824734	-0.644316	0.519371	0.810049
ENSMUSG00000020706	Ftsj3	402.945	482.396	451.93	391.983	332.988	465.822	420.456	446.176	424.337	-0.043251	0.100476	-0.430463	0.666859	0.886903
ENSMUSG00000020707	Rnf135	101.49	103.233	78.6377	115.7	88.957	101.429	113.783	92.8811	99.5138	-0.00432388	0.126572	-0.0341615	0.972748	0.99262
ENSMUSG00000020708	Psmc5	1209.84	1196.34	1212.73	1129.07	1238.18	1248.14	1342.64	1284.71	1232.71	0.100928	0.0645556	1.56343	0.117951	0.441584
ENSMUSG00000020709	Adap2	579.799	509.41	486.985	485.74	460.412	473.336	499.562	511.28	500.816	-0.0744147	0.0849222	-0.87627	0.380884	0.715604
ENSMUSG00000020715	Ern1	130.631	138.93	141.169	174.547	132.233	146.509	125.703	183.158	146.61	0.00903831	0.121469	0.0744086	0.940685	0.984704
ENSMUSG00000020716	Nf1	63.3056	72.3594	69.1633	75.8033	81.7442	50.7145	59.6007	69.4438	67.7669	-0.068698	0.133742	-0.513661	0.607489	0.856375
ENSMUSG00000020717	Pecam1	4.0194	2.89438	16.1065	63.8344	33.6594	55.4103	24.9239	25.1734	28.2527	0.0528339	0.0748971	0.70542	0.480549	NA
ENSMUSG00000020718	Polg2	30.1455	41.4861	25.5809	47.8758	37.2658	25.3573	30.3422	41.6663	34.965	-0.0490631	0.138674	-0.353801	0.723488	NA
ENSMUSG00000020719	Ddx5	6528.52	6311.67	6486.19	6454.25	5891.6	5348.5	5892.88	5460.89	6046.81	-0.182755	0.0556996	-3.28108	0.0010341	0.0300356
ENSMUSG00000020720	Psmd12	978.725	940.672	1007.13	958.513	1086.72	972.968	1056.56	1052.07	1006.67	0.0942059	0.0680021	1.38534	0.16595	0.512643
ENSMUSG00000020721	Helz	201.975	195.853	180.014	222.423	213.978	239.485	206.977	261.282	215.248	0.171488	0.106512	1.61003	0.10739	0.419316
ENSMUSG00000020728	Cep112	40.194	40.5213	31.2656	34.9094	24.0424	31.9314	41.1787	24.3053	33.5435	-0.132136	0.138965	-0.950862	0.341675	NA
ENSMUSG00000020733	Slc9a3r1	892.308	840.334	902.912	818.875	788.591	852.755	779.144	888.013	845.367	-0.0558744	0.0742603	-0.752413	0.451803	0.766286
ENSMUSG00000020736	Nt5c	353.708	411.966	325.92	335.131	383.477	401.96	351.102	420.135	372.925	0.11034	0.0951528	1.15961	0.246207	0.607855
ENSMUSG00000020737	Hn1	2214.69	2270.16	2450.09	2092.57	2278.02	2269.94	2147.79	2097.2	2227.56	-0.0361523	0.0660675	-0.547203	0.584239	0.844695
ENSMUSG00000020738	Sumo2	1935.34	1589.01	1853.2	1752.45	2179.45	1830.42	1882.3	1618.04	1830.03	0.0660943	0.0852333	0.775452	0.438073	0.755344
ENSMUSG00000020739	Nup85	328.586	356.008	352.448	330.143	275.286	333.401	392.281	346.351	339.313	-0.0164452	0.0990045	-0.166106	0.868074	0.965573
ENSMUSG00000020740	Gga3	328.586	316.452	275.706	307.203	290.913	313.679	279.581	299.476	301.45	-0.0444299	0.0936098	-0.474628	0.635052	0.87193
ENSMUSG00000020741	Cluh	181.878	286.543	226.439	246.361	222.392	283.626	285	296.004	253.53	0.164796	0.114557	1.43855	0.150279	0.495648
ENSMUSG00000020743	Mif4gd	432.086	454.417	463.299	455.817	454.402	436.708	379.277	435.76	438.971	-0.0733442	0.0848048	-0.864859	0.387116	0.720225
ENSMUSG00000020744	Slc25a19	237.145	281.719	240.65	256.335	254.85	236.668	231.901	199.651	242.365	-0.119054	0.102809	-1.15801	0.24686	0.608696
ENSMUSG00000020745	Pafah1b1	357.727	298.121	369.502	377.022	337.796	327.766	319.676	322.914	338.816	-0.0876135	0.0935703	-0.936339	0.349099	0.695303
ENSMUSG00000020747	Tmem94	168.815	182.346	161.065	196.49	145.457	169.988	182.053	208.331	176.818	-9.12799e-05	0.113813	-0.000802014	0.99936	0.999693
ENSMUSG00000020752	Recql5	114.553	122.529	85.2698	110.713	120.212	103.307	89.9429	89.4089	104.492	-0.0765463	0.126643	-0.604424	0.545562	0.823937
ENSMUSG00000020755	Sap30bp	313.514	316.452	304.129	329.146	349.817	370.028	316.425	328.99	328.563	0.098924	0.0903452	1.09496	0.273536	0.637035
ENSMUSG00000020766	Galk1	449.168	528.706	478.458	450.83	460.412	535.32	463.802	455.725	477.803	0.00589569	0.0877624	0.0671778	0.94644	0.985868
ENSMUSG00000020770	Unk	222.072	242.163	196.121	215.441	191.137	188.771	173.384	232.637	207.716	-0.12332	0.108964	-1.13175	0.257741	0.618523
ENSMUSG00000020773	Trim47	3020.58	3437.55	3651.44	2807.72	3186.82	3294.57	3080.81	3389.73	3233.65	0.00361066	0.0778323	0.0463903	0.962999	0.990661
ENSMUSG00000020774	Aspa	2.0097	11.5775	10.4219	6.98189	14.4255	16.9048	4.3346	4.34024	8.87451	0.0563132	0.10154	0.554593	0.579173	NA
ENSMUSG00000020775	Mrpl38	231.116	203.571	216.964	176.542	205.563	242.303	216.73	244.789	217.197	0.113835	0.106427	1.06961	0.284794	0.647056
ENSMUSG00000020776	Fbf1	145.703	137.965	93.7968	147.617	106.989	127.725	100.779	141.492	125.258	-0.092137	0.127461	-0.722862	0.469765	0.776856
ENSMUSG00000020777	Acox1	889.293	827.792	876.384	920.611	720.07	862.147	857.166	844.61	849.759	-0.0877804	0.0770942	-1.13861	0.254865	0.616223
ENSMUSG00000020778	Ten1	518.503	440.91	458.562	401.957	524.125	419.804	458.383	470.482	461.591	0.034392	0.0934193	0.368147	0.712764	0.905691
ENSMUSG00000020780	Srp68	431.081	519.058	452.877	439.859	373.86	484.605	441.045	439.232	447.702	-0.0711287	0.0930045	-0.764787	0.444398	0.759388
ENSMUSG00000020781	Tsen54	94.456	104.198	111.798	113.705	75.7336	115.516	89.9429	112.846	102.274	-0.0684517	0.126953	-0.539189	0.589757	0.84636
ENSMUSG00000020782	Llgl2	29.1407	19.2958	10.4219	15.9586	19.2339	18.7832	23.8403	19.9651	19.5799	0.0446547	0.131832	0.338725	0.734817	NA
ENSMUSG00000020783	Ncbp3	211.019	270.142	159.17	220.428	238.02	291.139	214.562	223.088	228.446	0.127271	0.119825	1.06215	0.288168	0.650782
ENSMUSG00000020788	Atp2a3	2416.67	3711.56	2371.45	2591.28	3327.47	4236.54	4579.5	4723.05	3494.69	0.403631	0.131027	3.08053	0.00206636	0.0461983
ENSMUSG00000020790	Ankfy1	1094.28	995.666	993.867	1238.79	1075.9	1172.07	1335.06	1331.59	1154.65	0.165764	0.0870349	1.90456	0.0568367	0.306625
ENSMUSG00000020792	Exoc7	652.148	721.665	671.736	602.437	629.911	701.551	607.927	630.203	652.197	-0.0387798	0.081189	-0.477649	0.6329	0.870956
ENSMUSG00000020794	Ube2g1	995.807	894.362	1060.19	912.632	928.037	802.98	980.702	929.679	938.049	-0.0779807	0.0812144	-0.960183	0.336963	0.68674
ENSMUSG00000020801	Med31	89.4317	76.2186	87.1647	82.7852	81.7442	94.8549	105.114	72.916	86.2787	0.0533628	0.128486	0.415319	0.677908	0.890818
ENSMUSG00000020802	Ube2o	54.262	93.5848	58.7414	110.713	80.5421	77.0109	68.2699	90.277	79.1751	-0.00168192	0.13716	-0.0122625	0.990216	0.996738
ENSMUSG00000020803	Txndc17	1498.23	1313.08	1437.27	1274.69	1631.28	1400.28	1427.17	1315.09	1412.14	0.0571345	0.0788565	0.724537	0.468736	0.776826
ENSMUSG00000020806	Rhbdf2	1587.66	2001.94	1601.18	1736.49	1478.61	1723.35	1715.42	1774.29	1702.37	-0.0443897	0.0821725	-0.540201	0.589059	0.84636
ENSMUSG00000020807	4933427D14Rik	51.2474	57.8875	69.1633	53.8603	62.5103	45.0796	53.0988	65.1036	57.2438	-0.0256427	0.135943	-0.188628	0.850384	0.960228
ENSMUSG00000020808	Fam64a	57.2765	70.4298	55.8991	68.8214	122.616	119.273	70.4372	98.0894	82.8554	0.445025	0.133789	3.32633	0.000879992	0.0271351
ENSMUSG00000020810	Cygb	11.0534	4.82396	13.2642	24.9353	9.61697	24.4181	14.0874	13.0207	14.4025	0.044159	0.117749	0.375026	0.707641	NA
ENSMUSG00000020812	1810032O08Rik	23.1116	21.2254	16.1065	11.9689	26.4467	28.1747	32.5095	24.3053	22.9811	0.244879	0.136124	1.79895	0.0720268	NA
ENSMUSG00000020814	Mxra7	60.2911	63.6763	45.4772	69.8189	66.1167	72.3152	56.3497	44.2704	59.7894	-0.00268537	0.136929	-0.0196114	0.984353	0.995744
ENSMUSG00000020817	Rabep1	890.298	721.665	840.381	865.754	824.655	772.927	848.497	782.111	818.286	-0.036702	0.0794697	-0.461836	0.644199	0.875527
ENSMUSG00000020818	Mfsd11	1885.1	2087.81	2137.43	1880.12	1565.16	1669.82	1656.9	1875.85	1844.77	-0.220769	0.0733382	-3.01028	0.00261003	0.0542742
ENSMUSG00000020821	Kif1c	93.4512	91.6553	88.1121	68.8214	111.797	90.1592	78.0227	92.8811	89.3625	0.0832518	0.128777	0.646481	0.517968	0.8087
ENSMUSG00000020823	Sec14l1	2266.94	2619.41	2229.33	2360.87	2427.08	2636.22	2469.64	2756.92	2470.8	0.111332	0.069945	1.5917	0.111451	0.429016
ENSMUSG00000020827	Mink1	81.3929	71.3946	52.1093	101.736	86.5527	106.125	119.201	102.43	90.1177	0.27993	0.133533	2.09633	0.0360531	0.244226
ENSMUSG00000020828	Pld2	681.289	776.658	628.154	634.354	629.911	730.665	788.896	723.084	699.126	0.0704889	0.087838	0.802489	0.42227	0.744201
ENSMUSG00000020829	Slc46a1	285.378	397.494	304.129	284.262	223.595	344.671	295.836	288.192	302.945	-0.108821	0.114588	-0.949669	0.342281	0.69008
ENSMUSG00000020831	0610010K14Rik	27.131	8.68313	27.4758	12.9664	25.2445	29.1139	16.2547	30.3817	22.1564	0.132113	0.12992	1.01689	0.309208	NA
ENSMUSG00000020832	Eral1	163.791	166.909	190.436	145.622	152.669	159.657	167.966	135.415	160.308	-0.0932441	0.113372	-0.822458	0.410816	0.736912
ENSMUSG00000020834	Dhrs13	4.0194	8.68313	4.73721	3.98965	9.61697	4.69579	9.75284	11.2846	7.09745	0.122114	0.105078	1.16212	0.245185	NA
ENSMUSG00000020840	Blmh	604.92	649.305	645.208	565.533	554.178	481.788	574.334	530.377	575.705	-0.185087	0.0831217	-2.2267	0.0259675	0.202785
ENSMUSG00000020841	Cpd	1320.37	1356.5	1441.06	1836.24	1857.28	1793.79	2001.5	2007.79	1701.82	0.3218	0.0888005	3.62385	0.000290253	0.0130155
ENSMUSG00000020843	Timm22	239.155	270.142	240.65	234.392	317.36	280.808	268.745	264.755	264.501	0.169114	0.0981942	1.72224	0.0850254	0.36984
ENSMUSG00000020846	Fam101b	10.0485	5.78875	4.73721	8.97671	2.40424	12.2091	14.0874	13.8888	9.01758	0.101957	0.108292	0.941499	0.346449	NA
ENSMUSG00000020849	Ywhae	2731.19	2479.52	2478.51	2366.86	2869.46	2779.91	2556.33	2445.29	2588.38	0.0768322	0.0701377	1.09545	0.27332	0.637035
ENSMUSG00000020850	Prpf8	523.527	471.783	546.674	593.46	608.273	667.741	668.611	653.64	591.714	0.255585	0.0835451	3.05925	0.00221892	0.0482717
ENSMUSG00000020857	Nme2	197.956	192.958	195.173	134.651	217.584	202.858	235.152	229.165	200.687	0.233389	0.113077	2.06397	0.0390204	0.254006
ENSMUSG00000020859	Spag9	773.735	766.045	740.9	970.482	793.4	818.006	788.896	842.006	811.684	-0.00269759	0.0855448	-0.0315342	0.974843	0.993043
ENSMUSG00000020863	Luc7l3	397.921	338.642	365.713	320.169	359.434	384.116	373.859	339.407	359.908	0.0297199	0.092449	0.321473	0.747852	0.919377
ENSMUSG00000020864	Ankrd40	327.581	422.579	431.086	638.344	573.412	455.492	565.665	695.306	513.683	0.190042	0.137595	1.38117	0.167227	0.515024
ENSMUSG00000020865	Abcc3	1819.79	2219.02	2089.11	2033.72	1824.82	2259.61	2210.64	2380.19	2104.61	0.0801988	0.0826086	0.970829	0.331634	0.683006
ENSMUSG00000020868	Xylt2	1070.17	1055.48	1021.34	1202.88	988.143	1345.81	1130.25	1223.08	1129.64	0.0974513	0.0872165	1.11735	0.263845	0.624776
ENSMUSG00000020869	Lrrc59	1561.54	2000.01	1694.03	1654.71	1696.19	1853.9	1873.63	1840.26	1771.78	0.0661753	0.0772503	0.856636	0.391646	0.722768
ENSMUSG00000020873	Slc35b1	598.891	530.636	546.674	541.595	608.273	586.974	563.497	576.384	569.115	0.0677356	0.0775734	0.873181	0.382565	0.716946
ENSMUSG00000020876	Snx11	139.674	215.149	137.379	164.573	153.871	132.421	146.293	185.762	159.39	-0.0616424	0.124508	-0.495088	0.620538	0.863632
ENSMUSG00000020877	Scrn2	7.03396	15.4367	16.1065	16.956	15.6276	10.3307	7.58554	7.81243	12.1112	-0.109971	0.120428	-0.913171	0.361153	NA
ENSMUSG00000020882	Cacnb1	15.0728	18.3311	12.3167	11.9689	14.4255	10.3307	6.50189	15.6249	13.0716	-0.0807049	0.12411	-0.650271	0.515517	NA
ENSMUSG00000020883	Fbxl20	360.742	331.889	347.711	364.055	304.137	286.443	329.429	290.796	326.9	-0.189809	0.0903454	-2.10092	0.0356478	0.24261
ENSMUSG00000020888	Dvl2	179.868	212.254	220.754	239.379	195.946	239.485	235.152	205.727	216.071	0.0334524	0.107897	0.31004	0.75653	0.921969
ENSMUSG00000020889	Nr1d1	1832.85	1872.66	1892.99	1701.59	1412.49	1764.68	1507.36	1794.25	1722.36	-0.155313	0.0797402	-1.94773	0.051447	0.290244
ENSMUSG00000020893	Per1	118.572	85.8665	113.693	141.633	109.393	128.665	101.863	159.721	119.926	0.0862735	0.130018	0.66355	0.506979	0.800146
ENSMUSG00000020894	Vamp2	269.3	262.423	255.809	300.221	302.934	320.253	257.908	282.984	281.479	0.0842296	0.0982474	0.857321	0.391268	0.722768
ENSMUSG00000020895	Tmem107	19.0922	19.2958	17.054	24.9353	26.4467	29.1139	15.1711	19.9651	21.3843	0.0660755	0.134851	0.489989	0.624142	NA
ENSMUSG00000020897	Aurkb	147.713	176.557	144.959	131.658	201.956	169.048	189.639	216.144	172.209	0.291853	0.113559	2.57007	0.0101679	0.12094
ENSMUSG00000020898	Ctc1	266.286	273.036	232.123	239.379	232.009	275.173	280.665	262.15	257.603	0.0484342	0.0997127	0.485738	0.627153	0.866972
ENSMUSG00000020899	Pfas	12.0582	20.2606	30.3181	14.9612	20.4361	15.9657	22.7566	19.097	19.4817	0.00112214	0.131686	0.00852137	0.993201	NA
ENSMUSG00000020900	Myh10	34.1649	40.5213	43.5823	16.956	25.2445	11.2699	18.422	19.9651	26.2658	-0.312074	0.133968	-2.32948	0.0198339	NA
ENSMUSG00000020901	Pik3r5	2870.86	3272.58	2447.24	2849.61	2406.65	2726.38	2871.67	2795.98	2780.12	-0.0746321	0.0821001	-0.909038	0.36333	0.703333
ENSMUSG00000020902	Ntn1	11.0534	4.82396	9.47442	15.9586	7.21273	10.3307	5.41824	11.2846	9.44458	-0.0519579	0.112628	-0.461323	0.644567	NA
ENSMUSG00000020903	Stx8	401.94	373.375	348.659	380.014	413.53	397.264	379.277	383.677	384.717	0.0579116	0.0861278	0.672392	0.501334	0.796825
ENSMUSG00000020910	Adprm	134.65	101.303	128.852	113.705	133.435	123.969	112.699	92.0131	117.578	-0.04035	0.124288	-0.324651	0.745446	0.918643
ENSMUSG00000020914	Top2a	279.349	437.051	375.187	343.11	530.135	525.928	537.49	506.072	441.79	0.46107	0.101659	4.53545	5.74818e-06	0.00097654
ENSMUSG00000020917	Acly	1864	2024.13	1667.5	1849.2	1693.79	1935.6	1782.6	1643.21	1807.51	-0.0641248	0.0748514	-0.856695	0.391613	0.722768
ENSMUSG00000020918	Kat2a	254.227	323.205	276.653	278.278	257.254	273.295	305.589	339.407	288.489	0.0473003	0.103648	0.456353	0.648136	0.877698
ENSMUSG00000020919	Stat5b	428.067	520.988	450.035	545.584	459.21	546.59	448.631	498.259	487.17	0.0067993	0.0940934	0.0722612	0.942394	0.984891
ENSMUSG00000020921	Tmem101	69.3347	65.6059	68.2158	52.8628	79.34	80.7676	68.2699	85.9367	71.2917	0.198691	0.131209	1.51431	0.129946	0.462466
ENSMUSG00000020922	Lsm12	208.004	188.134	239.703	187.513	211.573	189.71	248.156	209.199	210.249	0.0468639	0.109593	0.427617	0.66893	0.887843
ENSMUSG00000020923	Ubtf	678.274	920.412	713.424	728.111	726.081	840.546	850.664	885.409	792.865	0.105228	0.0927109	1.13501	0.256371	0.617673
ENSMUSG00000020925	Ccdc43	300.45	291.367	292.76	233.394	342.604	247.938	315.342	292.532	289.548	0.0793878	0.106156	0.747839	0.454557	0.767598
ENSMUSG00000020929	Eftud2	1071.17	1130.74	994.814	1072.22	1043.44	1177.7	1093.4	1098.08	1085.2	0.045403	0.070286	0.645975	0.518296	0.808793
ENSMUSG00000020935	Dcakd	190.922	172.698	156.328	140.635	238.02	226.337	215.646	220.484	195.134	0.363709	0.107949	3.36925	0.000753721	0.0245
ENSMUSG00000020936	Nmt1	1537.42	1651.72	1369.05	1350.5	1424.51	1372.11	1391.41	1572.9	1458.7	-0.0329204	0.0779976	-0.42207	0.672974	0.888779
ENSMUSG00000020941	Map3k14	234.13	190.064	170.54	248.356	188.733	214.128	228.65	236.977	213.947	0.0367479	0.113846	0.322786	0.746858	0.919052
ENSMUSG00000020946	Gosr2	1073.18	1190.55	996.709	1066.23	935.25	1087.54	989.371	1028.64	1045.94	-0.0894144	0.0759993	-1.17652	0.239389	0.598647
ENSMUSG00000020948	Klhl28	220.062	163.05	234.018	205.467	153.871	186.892	173.384	146.7	185.431	-0.245932	0.115361	-2.13185	0.0330193	0.232089
ENSMUSG00000020949	Fkbp3	357.727	272.071	307.919	294.237	387.083	308.044	287.167	325.518	317.471	0.070186	0.104015	0.674766	0.499824	0.796304
ENSMUSG00000020952	Scfd1	579.799	517.129	579.835	539.6	589.039	552.225	545.075	517.356	552.507	-0.0091431	0.0802041	-0.113998	0.909239	0.975431
ENSMUSG00000020954	Strn3	622.003	716.841	713.424	913.63	843.889	703.429	801.9	855.027	771.268	0.0953135	0.0974469	0.978107	0.328021	0.680373
ENSMUSG00000020955	Ap4s1	219.058	174.627	185.699	172.552	225.999	202.858	211.312	215.276	200.923	0.152653	0.105882	1.44172	0.14938	0.494674
ENSMUSG00000020956	Dtd2	157.762	137.965	160.118	162.578	167.095	183.136	127.871	152.776	156.163	0.0233196	0.115854	0.201284	0.840477	0.957204
ENSMUSG00000020961	Ston2	48.2329	28.9438	36.0028	29.9224	13.2233	32.8705	41.1787	26.0414	32.052	-0.133706	0.136654	-0.978428	0.327862	NA
ENSMUSG00000020962	Gtf2a1	570.755	460.206	544.779	644.328	548.167	482.727	575.418	741.313	570.962	0.066994	0.108178	0.619293	0.535723	0.817787
ENSMUSG00000020964	Sel1l	2329.24	2142.8	2036.05	2183.34	2125.35	2351.65	2352.6	2332.44	2231.69	0.0723169	0.0650905	1.11102	0.266559	0.626855
ENSMUSG00000020973	Dnaaf2	98.4754	80.0778	72.953	80.7904	82.9463	68.5585	115.95	92.0131	86.4706	0.0736594	0.132076	0.557704	0.577046	0.841669
ENSMUSG00000020974	Pole2	46.2232	38.5917	53.0568	31.9172	36.0636	44.1404	35.7604	52.9509	42.338	0.000618651	0.138939	0.00445268	0.996447	NA
ENSMUSG00000020978	Klhdc2	431.081	403.283	471.826	387.993	423.147	404.777	457.3	373.26	419.083	-0.0291796	0.0917749	-0.317947	0.750525	0.920922
ENSMUSG00000020982	Nemf	590.852	602.03	560.886	587.476	608.273	538.137	499.562	579.856	570.884	-0.0663742	0.0814779	-0.814629	0.415285	0.739416
ENSMUSG00000020986	Sec23a	463.236	510.375	539.095	478.758	544.561	417.925	510.399	457.461	490.226	-0.0425273	0.0916998	-0.463766	0.642815	0.874696
ENSMUSG00000020988	L2hgdh	28.1358	34.7325	34.1079	43.8861	42.0742	46.9579	36.8441	40.7982	38.4421	0.128879	0.138871	0.928043	0.353386	NA
ENSMUSG00000020993	Trappc6b	752.633	736.136	747.532	721.129	712.858	723.152	727.128	684.89	725.682	-0.0512382	0.0700888	-0.731046	0.464751	0.774619
ENSMUSG00000020994	Pnn	271.31	277.86	269.074	277.281	253.648	324.009	341.349	276.039	286.321	0.107033	0.100519	1.0648	0.286965	0.649041
ENSMUSG00000021000	Ctage5	1324.39	1366.15	1277.15	1199.89	1257.42	1239.69	1179.01	1339.4	1272.89	-0.0396037	0.069665	-0.568488	0.569703	0.835714
ENSMUSG00000021003	Galc	672.245	618.432	623.417	767.01	645.539	656.471	682.699	728.292	674.263	0.0166309	0.0841307	0.197679	0.843296	0.958362
ENSMUSG00000021007	Spata7	42.2037	43.4156	35.0554	48.8732	63.7124	45.0796	35.7604	49.4787	45.4474	0.103468	0.138569	0.746691	0.45525	NA
ENSMUSG00000021009	Ptpn21	88.4269	95.5144	63.4786	102.733	98.5739	116.456	121.369	138.02	103.071	0.30509	0.128993	2.36517	0.0180218	0.16746
ENSMUSG00000021012	Zc3h14	592.862	691.756	648.05	614.406	506.093	623.601	652.357	694.438	627.945	-0.0333897	0.0916415	-0.364351	0.715596	0.907196
ENSMUSG00000021013	Ttc8	88.4269	90.6905	107.061	114.702	81.7442	101.429	87.7756	71.1799	92.8762	-0.159314	0.128121	-1.24347	0.213695	0.574031
ENSMUSG00000021018	Polr2h	162.786	122.529	133.589	110.713	143.052	170.927	144.125	124.999	139.09	0.102703	0.121982	0.84195	0.399816	0.730064
ENSMUSG00000021022	Ppp2r3c	309.494	356.008	348.659	307.203	324.573	316.496	313.175	302.081	322.211	-0.0654072	0.0915096	-0.714757	0.474759	0.781058
ENSMUSG00000021023	1110008L16Rik	80.3881	81.0425	64.4261	90.7645	99.776	108.942	73.6881	75.5201	84.3185	0.116013	0.131914	0.879459	0.379152	0.714501
ENSMUSG00000021024	Psma6	1358.56	1293.79	1494.12	1382.41	1709.42	1525.19	1578.88	1470.47	1476.6	0.170513	0.0711523	2.39645	0.0165546	0.159079
ENSMUSG00000021025	Nfkbia	7732.33	7731.84	8285.38	7813.73	7747.67	6957.28	8169.63	7793.33	7778.9	-0.0395058	0.0616888	-0.640404	0.52191	0.810279
ENSMUSG00000021027	Ralgapa1	181.878	182.346	224.544	228.407	227.201	190.649	213.479	197.915	205.802	0.0143313	0.108338	0.132283	0.894761	0.970537
ENSMUSG00000021028	Mbip	153.742	125.423	145.906	139.638	185.127	125.847	176.635	134.547	148.358	0.0990856	0.12089	0.819636	0.412424	0.73772
ENSMUSG00000021033	Gstz1	94.456	82.9721	78.6377	84.78	72.1273	76.0718	80.19	57.2911	78.3158	-0.175768	0.129838	-1.35375	0.175816	0.526278
ENSMUSG00000021036	Sptlc2	1458.04	1504.11	1382.32	1560.95	1502.65	1382.44	1556.12	1493.91	1480.07	0.0064486	0.0672447	0.0958974	0.923602	0.979686
ENSMUSG00000021037	Ahsa1	661.192	676.319	642.366	607.424	628.709	606.696	663.193	638.015	640.489	-0.0266873	0.0751021	-0.355347	0.72233	0.910562
ENSMUSG00000021038	Vipas39	479.314	552.826	473.721	474.768	363.041	381.298	422.623	446.176	449.221	-0.258517	0.0905782	-2.85407	0.00431628	0.0750266
[truncated: 10,039 more rows]

## Sheet: MAC2_PAD4flCreLysMVsC57Bl6
Row.names	Gene_Symbol	B6_MAC2_1	B6_MAC2_2	B6_MAC2_3	B6_MAC2_4	Pad4flfl_LyzMCre_MAC2_1	Pad4flfl_LyzMCre_MAC2_2	Pad4flfl_LyzMCre_MAC2_3	Pad4flfl_LyzMCre_MAC2_4	baseMean	log2FoldChange	lfcSE	stat	pvalue	padj
ENSMUSG00000000001	Gnai3	2064.03	2118.19	2689.91	2534.8	2745.55	2854.37	2595.19	2797.85	2549.99	0.204817	0.101307	2.02174	0.0432033	0.390284
ENSMUSG00000000028	Cdc45	55.9592	79.8898	68.5263	65.33	64.6011	92.8251	102.456	68.4645	74.7565	0.183914	0.170146	1.08092	0.279734	0.739877
ENSMUSG00000000056	Narf	225.989	169.766	238.308	289.319	386.779	226.708	176.574	211.525	240.621	0.0804549	0.167207	0.481169	0.630396	0.912554
ENSMUSG00000000058	Cav2	1132.1	1220.54	1475.87	1041.55	1391.41	1336.15	1220.76	1138.35	1244.59	0.0559754	0.115135	0.48617	0.626847	0.912188
ENSMUSG00000000078	Klf6	15674	16722.5	17825	13387	16253	15076.9	16152.1	17011.9	16012.8	0.0183884	0.0964587	0.190636	0.848811	0.971551
ENSMUSG00000000085	Scmh1	198.009	185.3	187.169	245.454	192.975	243.666	164.584	196.197	201.669	-0.0259304	0.144997	-0.178834	0.858068	0.974583
ENSMUSG00000000088	Cox5a	780.2	701.255	882.66	701.831	587.208	757.774	951.535	584.503	743.371	-0.0743056	0.137485	-0.540463	0.588878	0.901784
ENSMUSG00000000127	Fer	213.075	136.478	214.784	153.059	212.024	212.427	208.182	207.437	194.683	0.178403	0.14756	1.20902	0.226657	0.695593
ENSMUSG00000000131	Xpo6	860.911	650.215	798.792	1144.21	989.722	731.89	718.284	980.983	859.376	-0.011467	0.14296	-0.0802111	0.936069	0.986777
ENSMUSG00000000134	Tfe3	1421.58	1376.99	1281.54	1482.99	1820.43	1428.97	1446.38	1433.67	1461.57	0.127238	0.104018	1.22323	0.221243	0.690916
ENSMUSG00000000148	Brat1	83.9388	103.191	84.8908	121.327	90.2759	63.371	62.1277	83.7923	86.6143	-0.265704	0.167056	-1.59051	0.11172	0.55287
ENSMUSG00000000149	Gna12	596.181	1543.43	982.892	1374.73	2140.95	1753.86	1443.11	1045.36	1360.06	0.250086	0.178739	1.39917	0.161762	0.620628
ENSMUSG00000000154	Slc22a18	67.7967	46.6024	50.1163	41.0646	61.2882	49.0902	40.3285	40.8743	49.6452	-0.0542957	0.176547	-0.307543	0.75843	0.948497
ENSMUSG00000000168	Dlat	478.881	428.298	515.482	599.169	577.269	548.918	487.212	569.175	525.551	0.0957285	0.119505	0.801042	0.423108	0.834707
ENSMUSG00000000171	Sdhd	1527.04	1512.36	1713.16	1385	1520.61	1501.27	1622.95	1454.1	1529.56	-0.00842567	0.0935177	-0.0900971	0.92821	0.984916
ENSMUSG00000000184	Ccnd2	301.319	441.613	357.973	373.314	301.472	301.682	469.773	391.371	367.315	-0.00941457	0.145108	-0.0648796	0.94827	0.990623
ENSMUSG00000000194	Gpr107	400.323	436.065	407.067	503.041	507.699	410.573	309.549	389.328	420.456	-0.0899862	0.13641	-0.659677	0.509461	0.8685
ENSMUSG00000000202	Btbd17	8.60911	22.1916	24.5467	44.7977	15.7362	14.2808	19.6193	16.3497	20.7664	-0.196793	0.167193	-1.17704	0.239179	NA
ENSMUSG00000000204	Slfn4	47.3501	58.8078	100.233	40.1313	4.1411	24.9914	9.80964	2.04372	35.9384	-0.682812	0.162727	-4.19606	2.71599e-05	0.00613382
ENSMUSG00000000244	Tspan32	624.16	524.832	638.215	489.042	563.189	535.53	568.959	649.901	574.229	0.022696	0.117124	0.193778	0.84635	0.97104
ENSMUSG00000000253	Gmpr	133.441	73.2324	138.075	76.5294	64.6011	86.5773	113.356	122.623	101.054	-0.0746096	0.175455	-0.425234	0.670666	0.925224
ENSMUSG00000000275	Trim25	1285.99	1182.81	1182.33	1365.4	1044.38	930.036	711.744	882.885	1073.2	-0.432315	0.115283	-3.75005	0.000176802	0.0206692
ENSMUSG00000000276	Dgke	35.5126	79.8898	56.253	69.0631	103.527	74.0816	79.5671	33.7213	66.452	0.136701	0.178738	0.764808	0.444386	0.843403
ENSMUSG00000000278	Scpep1	4852.31	4948.73	5349.14	4277.25	4730.79	4767.11	4922.26	4539.09	4798.33	-0.0328344	0.0879443	-0.373354	0.708885	0.935386
ENSMUSG00000000282	Mnt	62.416	72.1228	60.3441	66.2633	77.8526	87.4698	66.4876	60.2896	69.1557	0.112259	0.167224	0.671311	0.502023	0.865626
ENSMUSG00000000290	Itgb2	7005.66	6938.21	7972.58	8589.96	7804.31	7600.95	7691.85	7872.39	7684.49	0.0201674	0.0891598	0.226194	0.821051	0.964838
ENSMUSG00000000295	Hddc2	90.3956	105.41	108.415	78.396	108.497	121.387	183.113	76.6393	109.032	0.224132	0.17234	1.30052	0.193423	0.652648
ENSMUSG00000000301	Pemt	22.5989	1.10958	19.4328	15.8659	14.908	8.92549	15.2594	14.306	14.0508	-0.033523	0.149171	-0.224729	0.82219	NA
ENSMUSG00000000317	Bcl6b	13.9898	9.98623	15.3417	32.665	24.0184	30.3467	35.9687	58.2459	27.5703	0.369052	0.171926	2.14658	0.0318268	NA
ENSMUSG00000000318	Clec10a	1668.01	2461.05	1838.96	1699.51	1865.98	1966.29	2464.4	2101.96	2008.27	0.112895	0.124083	0.909838	0.362908	0.79416
ENSMUSG00000000325	Arvcf	37.6648	34.397	29.6606	59.7303	19.0491	35.702	25.0691	58.2459	37.4398	-0.098205	0.176543	-0.556266	0.578029	0.897196
ENSMUSG00000000326	Comt	1231.1	1372.55	1369.5	1101.28	1386.44	1172.81	1368.99	1431.62	1304.29	0.071621	0.104616	0.684609	0.49359	0.861993
ENSMUSG00000000339	Rtca	205.542	170.876	242.399	246.387	190.491	237.418	201.643	174.738	208.687	-0.0844851	0.144498	-0.58468	0.558763	0.890599
ENSMUSG00000000340	Dbt	165.725	124.273	257.741	225.855	248.466	224.03	207.092	238.093	211.409	0.178099	0.159269	1.11823	0.263469	0.728868
ENSMUSG00000000346	Dazap2	10810.9	9465.84	11350.8	9518.58	10093.5	11000.7	10837.5	11395.8	10559.2	0.0695918	0.0886085	0.785386	0.432228	0.839304
ENSMUSG00000000355	Mcts1	519.775	473.791	533.892	385.447	417.423	386.474	488.302	398.524	450.453	-0.152502	0.125776	-1.21249	0.225325	0.695104
ENSMUSG00000000359	Rem1	17.2182	19.9725	29.6606	17.7324	24.8466	31.2392	41.4185	50.071	29.0199	0.35047	0.177606	1.9733	0.048461	NA
ENSMUSG00000000374	Trappc10	154.964	187.519	166.713	169.858	275.797	209.749	174.394	170.65	188.706	0.226075	0.150973	1.49745	0.134277	0.58718
ENSMUSG00000000378	Ccm2	629.541	662.42	646.398	611.302	617.024	668.519	715.014	806.246	669.558	0.123929	0.107263	1.15537	0.24794	0.713608
ENSMUSG00000000384	Tbrg4	21.5228	51.0407	40.9112	52.264	24.0184	35.702	39.2386	35.765	37.5578	-0.146088	0.178582	-0.818046	0.413331	0.827957
ENSMUSG00000000386	Mx1	142.05	128.711	97.1642	87.7288	68.7422	97.2879	41.4185	65.3989	91.0628	-0.444707	0.174535	-2.54795	0.0108357	0.213217
ENSMUSG00000000392	Fap	10.7614	37.7258	22.5012	19.599	5.79754	15.1733	16.3494	0	15.9884	-0.242115	0.141915	-1.70606	0.0879975	NA
ENSMUSG00000000399	Ndufa9	1011.57	1058.54	1117.9	1084.48	861.348	1037.14	1192.42	1080.1	1055.44	-0.0322934	0.107626	-0.300052	0.764138	0.95025
ENSMUSG00000000420	Galnt1	1021.26	1283.79	1138.36	1386.86	1537.18	1733.33	1515.04	1612.49	1403.54	0.365051	0.106906	3.41468	0.000638571	0.0456188
ENSMUSG00000000439	Mkrn2	165.725	195.286	151.372	161.458	201.257	149.056	125.345	177.803	165.913	-0.0309601	0.151623	-0.204191	0.838204	0.968668
ENSMUSG00000000440	Pparg	326.07	199.725	239.331	251.987	206.227	159.766	139.515	123.645	205.783	-0.50926	0.157034	-3.24299	0.00118284	0.065558
ENSMUSG00000000441	Raf1	365.887	328.436	365.133	441.444	445.582	401.647	330.258	417.94	387.041	0.0751249	0.127612	0.588696	0.556066	0.890599
ENSMUSG00000000486	2001-09-01	1.07614	7.76707	5.1139	4.66643	5.79754	8.03294	4.35984	13.2841	6.26225	0.119436	0.131245	0.910022	0.362811	NA
ENSMUSG00000000489	Pdgfb	150.659	171.985	181.032	213.722	171.441	151.733	177.663	121.601	167.48	-0.159093	0.149947	-1.06099	0.288692	0.748431
ENSMUSG00000000530	Acvrl1	329.298	428.298	446.955	557.171	456.349	461.448	349.877	465.967	436.921	-0.0189335	0.140451	-0.134805	0.892766	0.981186
ENSMUSG00000000531	Grasp	41.9694	43.2737	57.2757	145.593	38.0981	37.4871	42.5084	26.5683	54.0967	-0.420993	0.176733	-2.38209	0.0172148	0.265215
ENSMUSG00000000532	Acvr1b	69.949	24.4108	18.4101	24.2654	18.2208	22.3137	29.4289	13.2841	27.5354	-0.241457	0.169135	-1.4276	0.153407	NA
ENSMUSG00000000538	Tom1l2	218.456	187.519	172.85	263.187	219.478	234.74	142.785	169.628	201.08	-0.0989329	0.156372	-0.632677	0.526945	0.878793
ENSMUSG00000000552	Zfp385a	193.705	170.876	148.303	204.39	149.908	158.874	125.345	112.404	157.976	-0.300487	0.150213	-2.00041	0.0454561	0.400441
ENSMUSG00000000555	Itga5	2782.89	3339.84	2958.91	4800.82	3971.31	3654.1	3250.26	3884.08	3580.28	0.0737092	0.132735	0.555313	0.578681	0.897281
ENSMUSG00000000561	Wdr77	120.527	142.026	174.896	128.793	151.564	159.766	131.885	149.191	144.831	0.0519313	0.148599	0.349472	0.726735	0.942511
ENSMUSG00000000563	Atp5f1	1609.9	1530.11	1845.1	1568.85	1430.34	1448.61	1621.86	1391.77	1555.82	-0.141857	0.0959179	-1.47894	0.139157	0.595137
ENSMUSG00000000568	Hnrnpd	484.262	665.749	582.985	811.025	605.429	749.741	582.039	585.524	633.344	-0.0101748	0.136519	-0.0745299	0.940589	0.987748
ENSMUSG00000000579	Dynlt1c	55.9592	55.4791	58.2985	42.9311	90.2759	53.553	59.9478	60.2896	59.5918	0.195147	0.174084	1.12099	0.262291	0.727877
ENSMUSG00000000581	C1d	532.688	468.243	537.983	487.175	456.349	486.439	518.821	476.186	495.486	-0.0589307	0.105281	-0.559747	0.575652	0.895794
ENSMUSG00000000594	Gm2a	3899.92	4751.23	4851.05	6993.11	4334.07	4359.21	4004.51	4047.58	4655.09	-0.246489	0.129311	-1.90617	0.0566281	0.434193
ENSMUSG00000000600	Krit1	370.192	356.176	360.019	410.646	425.705	519.464	482.852	491.514	427.071	0.317487	0.112397	2.8247	0.00473248	0.140061
ENSMUSG00000000605	Clcn4	1117.03	1273.8	1111.76	989.283	1181.04	1056.78	1113.94	1302.87	1143.31	0.0467111	0.105875	0.441192	0.659074	0.921646
ENSMUSG00000000628	Hk2	308.852	434.956	364.11	343.449	239.355	262.41	293.199	256.486	312.852	-0.393376	0.12956	-3.03625	0.00239543	0.0991402
ENSMUSG00000000631	Myo18a	221.684	150.903	241.376	455.443	338.742	283.831	171.124	221.743	260.606	-0.044508	0.175477	-0.25364	0.799773	0.961365
ENSMUSG00000000682	Cd52	2320.15	2283.52	2427.06	2979.98	1313.56	1500.38	1539.02	1058.64	1927.79	-0.769646	0.121338	-6.34297	2.25372e-10	5.5988e-07
ENSMUSG00000000686	Abhd15	39.8171	46.6024	25.5695	41.9978	43.0674	48.1977	38.1486	37.8087	40.1512	0.0674369	0.17787	0.379135	0.704588	0.935032
ENSMUSG00000000693	Loxl3	7.53297	4.43832	4.09112	21.4656	9.93863	17.851	8.71968	24.5246	12.3202	0.145017	0.146357	0.990848	0.32176	NA
ENSMUSG00000000708	Kat2b	349.745	291.82	204.556	260.387	266.687	238.311	207.092	251.377	258.747	-0.155636	0.146054	-1.0656	0.286604	0.746137
ENSMUSG00000000711	Rab5b	298.09	254.094	242.399	281.852	339.57	360.59	249.601	350.497	297.087	0.227365	0.134425	1.69139	0.0907624	0.513029
ENSMUSG00000000732	Icosl	407.856	363.943	277.174	557.171	420.736	454.308	342.247	479.251	412.836	0.059686	0.152573	0.391196	0.695652	0.933079
ENSMUSG00000000738	Spg7	311.004	350.628	380.474	431.178	342.055	291.864	355.327	410.787	359.165	-0.0633911	0.132474	-0.478515	0.632283	0.913062
ENSMUSG00000000740	Rpl13	4129.14	4049.97	3862.02	3325.3	2687.57	2886.5	3625.21	2797.85	3420.45	-0.320298	0.108898	-2.94126	0.00326877	0.116841
ENSMUSG00000000743	Chmp1a	1104.12	929.829	1029.94	1059.28	1012.91	979.127	973.334	1093.39	1022.74	-0.0212775	0.0949092	-0.224188	0.822611	0.965315
ENSMUSG00000000751	Rpa1	598.333	426.079	652.534	779.293	680.796	688.156	718.284	854.273	674.719	0.210123	0.139584	1.50535	0.132234	0.584598
ENSMUSG00000000753	Serpinf1	304.547	544.804	530.823	647.7	419.907	584.62	758.612	578.371	546.173	0.14904	0.159806	0.93263	0.351011	0.789644
ENSMUSG00000000759	Tubgcp3	218.456	271.847	211.716	319.184	356.963	287.401	274.67	315.754	281.999	0.220616	0.141597	1.55805	0.119221	0.567868
ENSMUSG00000000776	Polr3d	115.147	104.301	137.053	103.595	100.215	155.304	177.663	159.41	131.586	0.258471	0.161327	1.60215	0.109122	0.546821
ENSMUSG00000000787	Ddx3x	2989.51	3511.82	3584.85	3806.87	4100.52	3914.72	3527.11	3785.98	3652.67	0.130985	0.0952085	1.37576	0.168895	0.629112
ENSMUSG00000000804	Usp32	87.1672	165.328	137.053	107.328	96.0735	153.518	102.456	108.317	119.655	-0.0717981	0.168766	-0.425429	0.670524	0.925224
ENSMUSG00000000811	Txnrd3	80.7104	64.3557	145.235	125.06	123.405	157.089	113.356	116.492	115.713	0.187895	0.171987	1.0925	0.274615	0.739678
ENSMUSG00000000823	Zfp512b	67.7967	66.5749	61.3669	111.061	118.435	66.9412	76.2972	50.071	77.318	0.0135821	0.177537	0.0765033	0.939019	0.987748
ENSMUSG00000000826	Dnajc5	874.9	794.46	783.45	986.483	1100.7	1015.72	723.733	1016.75	912.025	0.141983	0.125553	1.13086	0.258115	0.725344
ENSMUSG00000000827	Tpd52l2	648.911	673.516	711.856	586.103	707.3	729.213	647.436	713.257	677.199	0.0867903	0.101839	0.852234	0.394084	0.815497
ENSMUSG00000000838	Fmr1	542.374	398.34	442.864	595.436	524.263	563.199	561.329	450.639	509.805	0.0710627	0.130443	0.544779	0.585906	0.90082
ENSMUSG00000000876	Pxmp4	200.162	245.217	275.128	228.655	242.668	188.328	227.802	227.874	229.479	-0.0811403	0.136325	-0.595196	0.551713	0.890383
ENSMUSG00000000881	Dlg3	19.3705	54.3695	23.524	23.3321	28.1595	53.553	34.8787	19.4153	32.0753	0.06817	0.173487	0.392939	0.694365	0.932447
ENSMUSG00000000884	Gnb1l	41.9694	7.76707	30.6834	16.7991	21.5337	26.7765	30.5189	40.8743	27.1153	0.101073	0.169477	0.596386	0.550918	NA
ENSMUSG00000000901	Mmp11	2.15228	0	5.1139	16.7991	6.62576	8.92549	2.17992	23.5027	8.1624	0.0848068	0.113308	0.74846	0.454183	NA
ENSMUSG00000000902	Smarcb1	486.414	493.764	506.277	484.375	475.398	443.597	485.032	461.88	479.592	-0.0724394	0.099951	-0.724749	0.468606	0.853627
ENSMUSG00000000915	Hip1r	8.60911	9.98623	5.1139	8.39957	10.7669	0.892549	3.26988	6.13115	6.64616	-0.0934913	0.130425	-0.716822	0.473484	NA
ENSMUSG00000000916	Nsun5	94.7002	115.396	124.779	94.2618	91.9324	120.494	98.0964	131.82	108.935	0.0316344	0.159309	0.198573	0.842597	0.969904
ENSMUSG00000000934	Top1mt	80.7104	44.3832	55.2302	32.665	27.3312	37.4871	32.6988	32.6994	42.9007	-0.356161	0.178737	-1.99265	0.0462999	0.402828
ENSMUSG00000000938	Hoxa10	7.53297	7.76707	3.06834	7.46628	14.0797	9.81804	11.9896	7.153	8.60938	0.16664	0.149959	1.11124	0.266467	NA
ENSMUSG00000000957	Mmp14	421.846	441.613	480.707	482.509	577.269	439.134	349.877	332.104	440.632	-0.0825049	0.142701	-0.578167	0.563151	0.892509
ENSMUSG00000000958	Slc7a7	587.571	578.092	470.479	371.448	440.613	415.928	445.794	495.601	475.691	-0.131417	0.134078	-0.980153	0.32701	0.776846
ENSMUSG00000000959	Oxa1l	229.217	210.82	129.893	145.593	151.564	157.981	137.335	159.41	165.227	-0.173345	0.157967	-1.09735	0.272487	0.739002
ENSMUSG00000000976	Heatr6	206.619	275.176	187.169	199.723	174.754	171.369	164.584	143.06	190.307	-0.323787	0.144277	-2.24421	0.024819	0.310613
ENSMUSG00000000982	Ccl3	2507.4	3164.53	2185.68	1150.74	1966.19	2092.14	2441.51	2512.75	2252.62	0.000438616	0.176574	0.00248403	0.998018	0.999644
ENSMUSG00000000983	Wfdc18	15.0659	26.6299	18.4101	7.46628	9.11042	23.2063	26.159	20.4372	18.3106	0.0683239	0.164786	0.414621	0.678419	NA
ENSMUSG00000001016	Ilf2	519.775	421.641	373.315	357.448	443.926	442.704	492.662	405.677	432.144	0.0805713	0.127939	0.629762	0.528851	0.879202
ENSMUSG00000001017	Chtop	787.733	792.241	827.43	783.96	875.428	842.567	877.418	941.131	840.988	0.137779	0.090009	1.53073	0.125836	0.577312
ENSMUSG00000001018	Snapin	877.053	872.131	973.687	787.693	1204.23	938.962	955.895	928.869	942.315	0.177409	0.1119	1.58543	0.112869	0.554769
ENSMUSG00000001020	S100a4	2698.95	2194.75	2889.36	2490.94	2642.85	2103.74	2616.99	2002.84	2455.05	-0.117887	0.114754	-1.0273	0.304277	0.763345
ENSMUSG00000001025	S100a6	6406.25	6031.68	7546.08	6118.62	5043.86	4298.52	6122.31	3533.58	5637.61	-0.386864	0.129725	-2.98218	0.00286204	0.10855
ENSMUSG00000001029	Icam2	40.8933	52.1503	30.6834	38.2647	24.8466	19.6361	23.9791	27.5902	32.2555	-0.379596	0.178733	-2.12382	0.0336854	0.356857
ENSMUSG00000001034	Mapk7	222.761	300.697	255.695	306.118	240.184	323.995	229.982	321.885	275.164	0.0319887	0.143428	0.223031	0.823512	0.965725
ENSMUSG00000001036	Epn2	87.1672	67.6845	67.5035	84.929	88.6195	81.222	74.1173	59.2677	76.3138	-0.0112714	0.166832	-0.0675612	0.946135	0.98979
ENSMUSG00000001039	B9d1	8.60911	2.21916	8.18225	8.39957	7.45398	8.03294	13.0795	3.06557	7.38026	0.0356175	0.137827	0.258421	0.796082	NA
ENSMUSG00000001052	Sec24b	542.374	598.064	443.887	617.835	513.496	484.654	372.766	509.907	510.373	-0.191039	0.129901	-1.47065	0.141385	0.596656
ENSMUSG00000001053	N4bp3	75.3297	80.9994	57.2757	87.7288	83.6502	65.1561	94.8265	109.339	81.7882	0.147993	0.169336	0.873959	0.382141	0.808292
ENSMUSG00000001054	Rmnd5b	469.196	473.791	357.973	343.449	467.944	433.779	412.005	418.962	422.137	0.0661957	0.126785	0.522109	0.601595	0.905071
ENSMUSG00000001056	Nhp2	654.292	575.873	692.423	519.84	486.993	554.273	767.332	527.279	597.288	-0.0541219	0.13545	-0.399572	0.689472	0.931041
ENSMUSG00000001062	Vps9d1	216.304	287.382	191.26	274.386	274.969	250.806	165.674	214.59	234.421	-0.0714564	0.153609	-0.465184	0.6418	0.915145
ENSMUSG00000001065	Zfp276	138.822	195.286	99.2097	145.593	202.086	159.766	99.1864	213.568	156.69	0.143109	0.171571	0.834109	0.404219	0.822538
ENSMUSG00000001082	Mfsd10	542.374	721.228	553.324	675.699	578.097	574.802	555.88	528.3	591.213	-0.137272	0.115415	-1.18937	0.234293	0.70295
ENSMUSG00000001089	Luzp1	457.359	699.036	549.233	542.239	637.729	552.488	558.06	553.847	568.749	0.03038	0.124821	0.243388	0.807705	0.961365
ENSMUSG00000001098	Kctd10	434.76	433.846	504.231	739.162	635.244	581.05	619.097	667.273	576.833	0.197173	0.140148	1.40689	0.159461	0.616801
ENSMUSG00000001100	Poldip2	270.111	336.203	294.561	309.851	347.852	316.855	362.957	336.191	321.823	0.149925	0.118226	1.26812	0.204755	0.668416
ENSMUSG00000001105	Ift20	298.09	238.56	296.606	244.521	195.46	249.914	378.216	224.809	265.772	-0.031705	0.155751	-0.203562	0.838696	0.968859
ENSMUSG00000001119	Col6a1	58.1115	138.698	126.825	356.515	156.533	207.071	204.912	190.066	179.841	0.0490534	0.165963	0.295567	0.767561	0.951741
ENSMUSG00000001120	Pcbp3	34.4364	54.3695	57.2757	91.462	85.3066	62.4785	59.9478	32.6994	59.747	0.00870887	0.178693	0.0487364	0.961129	0.992935
ENSMUSG00000001123	Lgals9	2638.69	2256.89	2296.14	1696.71	2039.9	2442.91	2478.57	2436.11	2285.74	0.0701428	0.119401	0.587454	0.556899	0.890599
ENSMUSG00000001127	Araf	697.338	667.968	672.99	636.501	661.747	603.363	596.208	643.77	647.486	-0.0863449	0.096178	-0.897761	0.369313	0.800581
ENSMUSG00000001128	Cfp	5143.94	3792.55	5282.66	5539.98	4199.07	3984.34	4154.93	4043.49	4517.62	-0.242629	0.108788	-2.23029	0.0257279	0.313972
ENSMUSG00000001131	Timp1	114.071	68.794	142.167	153.059	132.515	52.6604	69.7574	29.6339	95.3321	-0.341628	0.178167	-1.91747	0.0551788	0.429208
ENSMUSG00000001134	Uxt	139.898	127.602	183.078	130.66	149.908	131.205	178.753	164.519	150.703	0.0770931	0.151474	0.508953	0.610786	0.908872
ENSMUSG00000001138	Cnnm3	59.1876	56.5886	73.6402	35.4648	46.3803	54.4455	50.1382	42.918	52.3454	-0.122038	0.1765	-0.691435	0.489292	0.860584
ENSMUSG00000001143	Lman2l	255.045	326.217	398.885	361.181	268.343	328.458	281.21	385.24	325.572	-0.0701656	0.143473	-0.48905	0.624806	0.912137
ENSMUSG00000001150	Mcm3ap	106.538	54.3695	133.984	149.326	147.423	91.9326	105.726	120.579	113.735	0.0394568	0.175426	0.22492	0.822042	0.964989
ENSMUSG00000001151	Pcnt	255.045	259.642	168.759	321.983	298.159	202.609	250.691	253.421	251.289	-0.000855017	0.155059	-0.00551413	0.9956	0.999644
ENSMUSG00000001156	Mxd1	1763.79	1645.51	1613.95	2203.49	1173.59	1259.39	878.508	1398.92	1492.14	-0.520577	0.129985	-4.00491	6.20402e-05	0.0110088
ENSMUSG00000001157	Gmcl1	217.38	227.464	196.374	228.655	143.282	222.245	188.563	255.464	209.928	-0.0812996	0.150524	-0.540112	0.58912	0.901877
ENSMUSG00000001158	Snrnp27	301.319	321.779	263.877	244.521	207.883	224.922	263.77	195.175	252.906	-0.283637	0.135658	-2.09082	0.036544	0.366729
ENSMUSG00000001166	Oas1c	8.60911	33.2874	53.1846	38.2647	33.957	24.9914	51.2281	48.0273	36.4437	0.0873954	0.172087	0.507857	0.611554	0.909018
ENSMUSG00000001173	Ocrl	587.571	508.188	506.277	705.564	718.066	749.741	622.367	815.442	651.652	0.2849	0.124588	2.28674	0.0222111	0.297055
ENSMUSG00000001175	Calm1	16906.1	15656.2	18469.4	16558.4	13740.2	14985.9	17831.7	13768.5	15989.5	-0.150169	0.0996286	-1.50728	0.131738	0.58415
ENSMUSG00000001211	Agpat3	287.329	319.559	320.13	257.587	299.815	376.656	392.386	413.852	333.414	0.272634	0.129652	2.10282	0.0354816	0.361999
ENSMUSG00000001227	Sema6b	66.7206	108.739	47.0479	94.2618	76.1962	98.1804	76.2972	70.5082	79.7439	0.012957	0.175028	0.0740282	0.940988	0.987748
ENSMUSG00000001228	Uhrf1	103.309	140.917	152.394	395.713	197.116	198.146	190.743	156.344	191.835	-0.0519158	0.178172	-0.291381	0.77076	0.953503
ENSMUSG00000001229	Dpp9	370.192	420.531	363.087	496.508	383.466	356.127	291.019	411.809	386.592	-0.161662	0.133378	-1.21206	0.225489	0.695217
ENSMUSG00000001240	Ramp2	3.22841	11.0958	22.5012	28.9319	14.908	21.4212	15.2594	12.2623	16.201	-0.0124224	0.155697	-0.0797855	0.936408	NA
ENSMUSG00000001247	Lsr	211.999	207.492	308.88	492.775	275.797	155.304	164.584	207.437	253.033	-0.378896	0.172902	-2.1914	0.028423	0.325875
ENSMUSG00000001248	Gramd1a	854.454	794.46	645.375	815.692	734.631	664.057	718.284	726.541	744.187	-0.116038	0.10826	-1.07185	0.283787	0.744347
ENSMUSG00000001249	Hpn	49.5024	28.8491	21.4784	17.7324	41.411	44.6275	17.4394	24.5246	30.6956	0.05132	0.17355	0.295707	0.767454	NA
ENSMUSG00000001270	Ckb	3135.87	3439.7	2893.45	3526.89	2767.91	2714.24	2776.13	3110.53	3045.59	-0.179095	0.0928548	-1.92876	0.0537601	0.424316
ENSMUSG00000001280	Sp1	216.304	229.683	181.032	233.321	288.22	287.401	213.632	264.661	239.282	0.242604	0.136575	1.77635	0.0756757	0.480309
ENSMUSG00000001281	Itgb7	342.212	375.038	386.611	1638.85	471.257	373.086	213.632	403.634	525.54	-0.227797	0.155673	-1.4633	0.143384	0.598691
ENSMUSG00000001285	Myg1	182.943	178.643	199.442	174.524	161.503	170.477	211.452	126.71	175.712	-0.105783	0.148077	-0.714377	0.474994	0.856239
ENSMUSG00000001288	Rarg	102.233	73.2324	61.3669	114.794	115.123	96.3953	65.3976	104.229	91.5964	0.0738547	0.172881	0.4272	0.669234	0.92492
ENSMUSG00000001289	Pfdn5	658.597	746.748	686.286	553.438	491.134	510.538	680.135	556.912	610.474	-0.207015	0.125043	-1.65555	0.0978129	0.526811
ENSMUSG00000001305	Rrp15	232.446	219.697	240.354	220.255	154.049	172.262	186.383	175.76	200.151	-0.345717	0.12934	-2.67293	0.00751919	0.17918
ENSMUSG00000001313	Rnd2	30.1319	26.6299	52.1618	46.6643	47.2085	68.7263	65.3976	42.918	47.4798	0.276579	0.178407	1.55027	0.121077	0.570856
ENSMUSG00000001323	Srr	61.3399	67.6845	52.1618	49.4641	55.4907	71.4039	83.9269	56.2022	62.2093	0.133664	0.17213	0.776531	0.437436	0.841709
ENSMUSG00000001348	Acp5	304.547	391.682	319.108	262.253	215.337	233.848	273.58	287.142	285.937	-0.276508	0.139296	-1.98504	0.0471396	0.403816
ENSMUSG00000001366	Fbxo9	223.837	249.656	216.83	266.92	236.871	223.137	252.871	250.355	240.059	0.00608634	0.126545	0.0480961	0.96164	0.992935
ENSMUSG00000001376	Vps50	595.104	509.298	560.484	522.64	494.447	548.918	498.112	501.732	528.842	-0.0888814	0.104022	-0.854449	0.392856	0.815332
ENSMUSG00000001380	Hars	573.582	477.12	527.755	541.306	544.968	565.876	564.599	491.514	535.84	0.0285575	0.106357	0.268507	0.788309	0.958075
ENSMUSG00000001383	Zmat2	329.298	320.669	347.746	353.715	322.177	296.326	337.888	273.858	322.71	-0.119512	0.11744	-1.01765	0.308846	0.766483
ENSMUSG00000001403	Ube2c	184.02	252.985	200.465	246.387	177.239	232.063	298.649	264.661	232.059	0.103353	0.151122	0.683902	0.494037	0.861993
ENSMUSG00000001415	Smg5	199.086	205.273	135.007	234.255	187.178	149.948	144.965	149.191	175.613	-0.219804	0.154208	-1.42537	0.154049	0.609874
ENSMUSG00000001416	Cct3	1435.57	1564.51	1589.4	1513.79	1530.55	1296.87	1618.59	1354.98	1488.03	-0.0676022	0.0973504	-0.694421	0.487418	0.860523
ENSMUSG00000001418	Glmp	927.631	1110.69	1059.6	989.283	1068.4	1078.2	1013.66	977.918	1028.17	0.0171081	0.0950307	0.180027	0.857131	0.974341
ENSMUSG00000001419	Mef2d	787.733	770.049	652.534	876.355	703.158	633.71	567.869	557.934	693.668	-0.285365	0.116873	-2.44167	0.0146197	0.247663
ENSMUSG00000001424	Snd1	807.104	1057.43	1135.29	1571.65	1275.46	1071.06	1082.33	1140.39	1142.59	-0.000906223	0.140117	-0.0064676	0.99484	0.999644
ENSMUSG00000001435	Col18a1	9.68524	14.4246	31.7062	97.995	25.6748	16.0659	16.3494	21.459	29.17	-0.23902	0.155567	-1.53645	0.124429	NA
ENSMUSG00000001436	Slc19a1	211.999	199.725	259.786	171.725	265.03	236.526	243.061	205.393	224.156	0.139966	0.14154	0.988879	0.322722	0.774238
ENSMUSG00000001440	Kpnb1	478.881	444.942	415.249	405.046	403.343	440.919	360.777	496.623	430.723	-0.0301427	0.121243	-0.248613	0.80366	0.961365
ENSMUSG00000001441	Npepps	320.689	376.148	276.151	363.981	295.674	268.657	235.431	284.076	302.601	-0.253692	0.130441	-1.94488	0.0517893	0.42078
ENSMUSG00000001445	Mrpl10	284.1	287.382	279.219	231.455	221.135	225.815	286.659	247.29	257.882	-0.120049	0.131307	-0.91426	0.36058	0.794029
ENSMUSG00000001467	Cyp51	410.009	424.97	366.156	464.776	400.03	401.647	345.517	464.945	409.756	-0.0409979	0.122276	-0.335289	0.737407	0.944877
ENSMUSG00000001472	Tcf25	1951.04	1776.44	1655.88	1944.03	1939.69	1835.08	1719.96	1814.82	1829.62	-0.00303631	0.0904983	-0.0335511	0.973235	0.995099
ENSMUSG00000001473	Tubb6	5023.41	5770.93	5632.45	4867.08	5942.48	5268.72	5368.05	5819.48	5461.58	0.0682668	0.0890094	0.766962	0.443104	0.843202
ENSMUSG00000001482	Def8	228.141	274.067	230.126	236.121	313.895	207.964	187.473	225.831	237.952	-0.0368352	0.147299	-0.250071	0.802532	0.961365
ENSMUSG00000001506	Col1a1	95.7763	359.504	644.352	2418.14	745.398	1257.6	1145.55	658.076	915.55	0.0162247	0.125062	0.129733	0.896778	0.981186
ENSMUSG00000001517	Foxm1	72.1013	95.424	50.1163	117.594	115.951	114.246	83.9269	176.781	103.268	0.318791	0.176349	1.80773	0.070649	0.469278
ENSMUSG00000001518	Itfg2	51.6546	32.1779	35.7973	75.5961	101.043	61.5859	64.3076	80.7268	62.8611	0.352704	0.178145	1.97986	0.0477189	0.404809
ENSMUSG00000001521	Tulp3	4.30455	13.315	9.20503	4.66643	6.62576	9.81804	3.26988	3.06557	6.78378	-0.0761419	0.134639	-0.565525	0.571717	NA
ENSMUSG00000001524	Gtf2h4	230.294	74.3419	145.235	131.593	137.484	148.163	138.425	127.732	141.659	-0.0465752	0.173663	-0.268193	0.78855	0.958075
ENSMUSG00000001525	Tubb5	2495.56	2491.01	2494.56	2451.74	2314.87	2425.06	2527.62	2582.23	2472.83	-0.0118246	0.0773553	-0.152861	0.878508	0.978706
ENSMUSG00000001542	Ell2	520.851	442.723	512.413	514.24	434.815	387.366	331.348	309.623	431.672	-0.379373	0.124535	-3.04632	0.00231659	0.0968096
ENSMUSG00000001552	Jup	596.181	727.885	633.101	1124.61	974.814	776.518	723.733	663.186	777.503	0.0200288	0.151056	0.132592	0.894516	0.981186
ENSMUSG00000001555	Fkbp10	13.9898	32.1779	31.7062	62.5301	34.7852	57.1232	40.3285	42.918	39.4449	0.130086	0.176194	0.738311	0.460326	0.849804
ENSMUSG00000001569	Nom1	227.065	219.697	207.625	332.25	303.957	320.425	292.109	301.448	275.572	0.243423	0.141393	1.7216	0.0851418	0.500514
ENSMUSG00000001576	Ergic1	504.709	564.777	524.687	453.577	486.165	440.027	567.869	477.208	502.377	-0.048693	0.115974	-0.419862	0.674586	0.926437
ENSMUSG00000001627	Ifrd1	4813.57	5744.3	5551.65	4924.95	5103.49	4893.85	4766.4	5505.77	5163	-0.0496781	0.0906939	-0.547756	0.583859	0.900612
ENSMUSG00000001630	Stk38l	203.39	224.135	191.26	242.654	211.196	295.434	223.442	238.093	228.701	0.137285	0.138642	0.990218	0.322067	0.774152
ENSMUSG00000001632	Brpf1	723.165	778.926	776.291	1074.21	937.545	753.312	650.706	915.584	826.218	-0.0346088	0.134594	-0.257134	0.797075	0.96088
ENSMUSG00000001642	Akr1b3	1266.61	964.226	1254.95	976.217	1090.77	1138.89	1287.24	1227.25	1150.77	0.0780125	0.113747	0.685841	0.492814	0.861824
ENSMUSG00000001665	Gstt3	32.2841	46.6024	67.5035	60.6636	50.5214	78.5443	45.7783	59.2677	55.1457	0.0972634	0.17778	0.547101	0.584309	0.900612
ENSMUSG00000001666	Ddt	103.309	85.4378	107.392	83.0624	75.368	88.3624	112.266	68.4645	90.4578	-0.0971856	0.165552	-0.587042	0.557176	0.890599
ENSMUSG00000001674	Ddx18	198.009	235.231	232.171	213.722	150.736	184.758	184.203	181.891	197.59	-0.272145	0.133696	-2.03555	0.041796	0.387426
ENSMUSG00000001687	Ubl3	3355.4	3813.63	3941.8	3773.27	3538.98	3696.94	3484.6	3411.98	3627.08	-0.0704718	0.0827112	-0.852023	0.394202	0.81557
ENSMUSG00000001700	Gramd3	210.923	322.888	184.101	183.857	233.558	246.344	298.649	274.88	244.4	0.169566	0.15392	1.10165	0.270615	0.738968
ENSMUSG00000001707	Eef1e1	262.578	258.532	302.743	209.989	211.196	182.973	286.659	214.59	241.158	-0.164496	0.146495	-1.12288	0.261489	0.727877
ENSMUSG00000001729	Akt1	575.734	1491.28	1124.04	2040.16	2067.24	1687.81	1629.49	1085.21	1462.62	0.132758	0.177153	0.7494	0.453616	0.848064
ENSMUSG00000001741	Il16	331.451	277.395	235.24	201.59	360.276	250.806	304.099	289.186	281.255	0.161368	0.147281	1.09565	0.273231	0.739678
ENSMUSG00000001750	Tcirg1	1404.36	1069.64	949.141	1126.48	997.176	991.622	745.533	1106.67	1048.83	-0.205625	0.129805	-1.58411	0.113168	0.555566
ENSMUSG00000001751	Naglu	708.099	717.899	771.177	814.758	955.765	788.121	885.048	1004.49	830.669	0.243802	0.105741	2.30565	0.0211304	0.291224
ENSMUSG00000001755	Coasy	201.238	246.327	257.741	191.324	235.214	255.269	262.68	290.208	242.5	0.180845	0.13491	1.34049	0.180087	0.638004
ENSMUSG00000001761	Smo	5.38069	57.6982	19.4328	35.4648	32.3006	30.3467	31.6088	33.7213	30.7442	0.0368201	0.165605	0.222336	0.824052	NA
ENSMUSG00000001767	Crnkl1	267.958	315.121	291.493	300.518	326.319	305.252	301.919	326.994	304.447	0.0894839	0.11573	0.773215	0.439395	0.842259
ENSMUSG00000001768	Rin2	3550.18	3403.09	3455.98	2614.13	3903.4	3687.12	3758.18	4032.25	3550.54	0.218561	0.102492	2.13246	0.0329688	0.352307
ENSMUSG00000001774	Chordc1	454.13	407.216	466.388	364.915	462.147	441.812	441.434	441.443	434.936	0.0702624	0.112909	0.62229	0.533751	0.882625
ENSMUSG00000001783	Rtcb	744.688	589.188	777.313	661.699	814.14	798.832	798.941	786.83	746.454	0.185764	0.106497	1.74432	0.0811038	0.491309
ENSMUSG00000001785	Pwp1	402.476	557.01	542.074	467.576	438.956	493.58	519.911	546.694	496.035	0.0181067	0.12343	0.146695	0.883373	0.979101
ENSMUSG00000001786	Fbxo7	230.294	200.834	221.943	144.659	235.214	215.104	203.823	308.601	220.059	0.206672	0.152966	1.3511	0.176663	0.634147
ENSMUSG00000001794	Capns1	700.566	802.227	729.243	612.235	740.428	697.081	650.706	767.415	712.488	0.00619115	0.109371	0.0566069	0.954858	0.991987
ENSMUSG00000001829	Clpb	220.608	219.697	263.877	228.655	229.417	194.576	286.659	238.093	235.198	0.0176884	0.137418	0.128719	0.89758	0.981186
ENSMUSG00000001833	2007-09-01	3677.16	3216.68	4196.47	3406.49	3684.75	4119.12	3952.2	3825.84	3759.84	0.095802	0.0966629	0.991094	0.32164	0.774152
ENSMUSG00000001844	Zdhhc4	298.09	341.751	273.083	313.584	321.349	304.359	321.538	258.53	304.036	-0.0203043	0.124561	-0.163007	0.870513	0.97633
ENSMUSG00000001847	Rac1	5704.61	5029.73	6531.48	6456.47	5532.51	5970.26	5798.59	5470	5811.71	-0.0544674	0.0965949	-0.563874	0.57284	0.895475
ENSMUSG00000001855	Nup214	346.516	396.12	257.741	432.111	466.288	358.805	308.459	447.574	376.702	0.111311	0.148612	0.749005	0.453854	0.848064
ENSMUSG00000001865	Cpa3	2.15228	8.87665	49.0935	51.3307	4.1411	13.3882	7.62972	20.4372	19.6312	-0.218746	0.135879	-1.60986	0.107429	NA
ENSMUSG00000001870	Ltbp1	0	1.10958	6.13669	36.3981	28.9877	4.46275	14.1695	8.17486	12.4299	0.0379453	0.111634	0.339907	0.733926	NA
ENSMUSG00000001891	Ugp2	1073.99	833.295	989.029	965.95	899.446	1071.06	999.493	965.656	974.739	0.0242671	0.104688	0.231803	0.816691	0.962879
ENSMUSG00000001909	Trmt1	234.598	231.902	198.419	184.791	207.055	177.617	268.13	201.306	212.977	0.00508687	0.143884	0.035354	0.971797	0.995099
ENSMUSG00000001910	Nacc1	51.6546	83.2186	35.7973	69.0631	48.0367	64.2636	51.2281	68.4645	58.9658	-0.0266024	0.177384	-0.149971	0.880788	0.979101
ENSMUSG00000001911	Nfix	75.3297	165.328	148.303	111.061	116.779	126.742	115.536	115.47	121.819	-0.0501467	0.167442	-0.299487	0.764569	0.950311
ENSMUSG00000001918	Slc1a5	900.728	1191.69	804.929	1124.61	920.152	805.972	998.403	931.934	959.802	-0.118679	0.123705	-0.959366	0.337374	0.780774
ENSMUSG00000001924	Uba1	2297.56	2092.67	2117.16	2815.72	2337.24	2337.59	2017.52	2388.08	2300.44	-0.0342937	0.107993	-0.317556	0.750821	0.947644
ENSMUSG00000001930	Vwf	102.233	102.081	90.0047	124.127	48.865	74.0816	76.2972	69.4863	85.897	-0.442311	0.165782	-2.66803	0.0076297	0.179726
ENSMUSG00000001942	Siae	414.313	407.216	416.272	360.248	330.46	419.498	343.337	400.568	386.489	-0.0843494	0.119313	-0.706957	0.479593	0.857963
ENSMUSG00000001946	Esam	1.07614	0	6.13669	30.7984	3.31288	0	15.2594	19.4153	9.49986	-0.00139147	0.0963737	-0.0144383	0.98848	NA
ENSMUSG00000001948	Spa17	5.38069	7.76707	12.2734	12.1327	11.5951	8.92549	6.53976	6.13115	8.84316	-0.0403853	0.150915	-0.267604	0.789005	NA
ENSMUSG00000001962	Fam50a	784.505	912.076	834.589	647.7	621.165	745.279	830.55	762.306	767.271	-0.0897141	0.121643	-0.737519	0.460807	0.850016
ENSMUSG00000001964	Emd	201.238	188.629	155.463	141.859	151.564	143.7	176.574	163.497	165.316	-0.0891588	0.145862	-0.611255	0.541031	0.886142
ENSMUSG00000001983	Taco1	11.8375	14.4246	11.2506	8.39957	2.48466	7.14039	1.08996	16.3497	9.12212	-0.13161	0.13572	-0.96972	0.332186	NA
ENSMUSG00000001995	Sipa1l2	175.411	133.15	115.574	232.388	369.386	221.352	150.414	192.109	198.723	0.31102	0.174232	1.7851	0.0742459	0.477219
ENSMUSG00000001998	Ap4e1	109.766	206.382	105.346	164.258	108.497	83.0071	98.0964	122.623	124.747	-0.333943	0.169461	-1.97061	0.0487682	0.407921
ENSMUSG00000001999	Blvra	1530.27	1477.96	1630.31	1215.14	1377.33	1387.02	1598.97	1463.3	1460.04	-0.00612181	0.10567	-0.0579333	0.953802	0.991987
ENSMUSG00000002010	Idh3g	1015.87	1059.65	1174.15	1046.21	1108.16	919.326	1043.09	963.612	1041.26	-0.0830684	0.0984385	-0.843861	0.398747	0.818858
ENSMUSG00000002014	Ssr4	751.144	625.804	657.648	573.037	596.318	647.098	708.474	511.951	633.934	-0.070869	0.121122	-0.585103	0.558479	0.890599
ENSMUSG00000002015	Bcap31	2201.78	1918.47	2351.37	2014.96	1727.67	1928.8	2242.05	1736.14	2015.15	-0.137885	0.106798	-1.29108	0.196675	0.658745
ENSMUSG00000002017	Fam98a	158.192	117.616	101.255	157.725	100.215	123.172	177.663	104.229	130.008	-0.0581614	0.167344	-0.347556	0.728173	0.942511
ENSMUSG00000002028	Kmt2a	306.699	226.355	219.898	218.389	254.263	157.089	240.881	198.24	227.727	-0.146087	0.151796	-0.96239	0.335854	0.780662
ENSMUSG00000002031	Ift46	63.4922	147.574	161.599	137.193	188.834	168.692	191.833	135.907	149.391	0.275324	0.170901	1.61101	0.107177	0.544564
ENSMUSG00000002043	Trappc6a	284.1	346.189	225.012	228.655	274.141	270.442	257.231	202.328	261.012	-0.0847568	0.146111	-0.580085	0.561857	0.892279
ENSMUSG00000002052	Supt6	276.568	277.395	180.009	299.585	180.552	186.543	206.002	103.208	213.733	-0.428786	0.163578	-2.6213	0.00875948	0.193
ENSMUSG00000002055	Spag5	63.4922	51.0407	42.9568	97.995	162.331	74.9741	59.9478	111.382	83.015	0.342396	0.178732	1.91569	0.0554045	0.429208
ENSMUSG00000002058	Unc119	122.68	207.492	204.556	300.518	209.54	175.832	224.532	204.372	206.19	-0.0272846	0.164671	-0.165692	0.8684	0.975331
ENSMUSG00000002059	Rab34	96.8524	96.5336	105.346	84.929	45.5521	141.023	128.615	82.7705	97.7028	0.0283993	0.177345	0.160136	0.872774	0.977102
ENSMUSG00000002064	Sdf2	500.404	436.065	428.545	372.381	470.429	347.202	440.344	398.524	424.237	-0.0579132	0.12658	-0.457521	0.647297	0.91646
ENSMUSG00000002068	Ccne1	44.1217	52.1503	73.6402	78.396	96.9017	99.073	90.4667	78.683	76.6791	0.360485	0.170286	2.11695	0.0342645	0.357971
ENSMUSG00000002083	Bbc3	99.0047	89.8761	143.189	137.193	115.951	106.213	71.9374	89.9235	106.661	-0.194776	0.166996	-1.16635	0.243472	0.710399
ENSMUSG00000002100	Mybpc3	57.0353	52.1503	20.4556	27.9986	62.9447	31.2392	41.4185	31.6776	40.615	0.0402082	0.176984	0.227186	0.820279	0.964425
ENSMUSG00000002102	Psmc3	1549.64	1604.45	1722.36	1662.18	1605.92	1616.41	1664.37	1646.21	1633.94	-0.00154917	0.0806092	-0.0192183	0.984667	0.997695
ENSMUSG00000002103	Acp2	1522.74	1401.4	1623.15	1308.47	1577.76	1573.56	1394.06	1632.93	1504.26	0.071402	0.0983084	0.726307	0.467651	0.853453
ENSMUSG00000002104	Rapsn	24.7512	39.9449	29.6606	20.5323	18.2208	22.3137	20.7092	20.4372	24.5712	-0.215508	0.177544	-1.21383	0.224813	NA
ENSMUSG00000002105	Slc39a13	363.735	368.381	290.47	317.317	347.852	264.195	300.829	412.831	333.201	-0.0123052	0.138545	-0.0888173	0.929227	0.985246
ENSMUSG00000002107	Celf2	2384.72	2303.49	2224.55	2091.49	1878.4	1826.16	1959.75	1877.15	2068.21	-0.241471	0.0819487	-2.94662	0.00321271	0.11625
ENSMUSG00000002108	Nr1h3	174.334	115.396	84.8908	109.194	116.779	134.775	87.1968	139.995	120.32	-0.00820875	0.169677	-0.0483786	0.961415	0.992935
ENSMUSG00000002109	Ddb2	33.3603	69.9036	36.8201	26.132	64.6011	47.3051	46.8683	71.53	49.5651	0.23708	0.178745	1.32635	0.184722	0.641337
ENSMUSG00000002111	Spi1	4186.18	4108.78	4101.35	3906.73	3726.99	3133.74	3628.48	3280.16	3759.05	-0.228792	0.0854239	-2.67832	0.00739926	0.178462
ENSMUSG00000002129	Sf3a1	128.06	311.792	288.424	363.981	308.098	342.739	240.881	237.071	277.631	0.031032	0.170343	0.182174	0.855446	0.973863
ENSMUSG00000002147	Stat6	2011.3	2157.03	2185.68	2803.59	2685.09	2209.95	2002.26	2565.88	2327.6	0.0413622	0.11857	0.348841	0.727209	0.942511
ENSMUSG00000002204	Napsa	531.612	677.954	791.632	1476.46	624.478	620.322	497.022	577.35	724.603	-0.400123	0.166154	-2.40815	0.0160338	0.259066
ENSMUSG00000002205	Vrk3	200.162	201.944	216.83	197.857	170.613	233.848	221.262	217.656	207.521	0.0368107	0.134969	0.272734	0.785058	0.957256
ENSMUSG00000002210	Smg9	289.481	260.752	246.49	242.654	297.331	300.789	306.279	314.732	282.314	0.201707	0.118353	1.70429	0.088327	0.508128
ENSMUSG00000002221	Paxip1	203.39	205.273	235.24	335.983	385.95	268.657	246.331	331.082	276.488	0.246211	0.155469	1.58367	0.113269	0.555566
ENSMUSG00000002222	Rmnd5a	231.37	292.929	372.292	473.176	436.472	407.895	324.808	509.907	381.106	0.215184	0.157703	1.36449	0.172413	0.632185
ENSMUSG00000002227	Mov10	74.2535	104.301	53.1846	74.6628	30.6441	90.1475	75.2072	67.4426	71.2304	-0.114723	0.178568	-0.642462	0.520573	0.875433
ENSMUSG00000002233	Rhoc	319.613	466.024	382.52	236.121	351.993	207.964	369.496	255.464	323.65	-0.172441	0.162922	-1.05842	0.289864	0.748845
ENSMUSG00000002250	Ppard	17.2182	51.0407	16.3645	20.5323	14.0797	11.6031	19.6193	22.4809	21.6173	-0.207579	0.167968	-1.23582	0.216524	NA
ENSMUSG00000002257	Def6	68.8728	84.3282	133.984	224.922	133.343	117.817	99.1864	82.7705	118.153	-0.130321	0.178282	-0.730985	0.464788	0.8523
ENSMUSG00000002265	Peg3	1.07614	5.54791	1.02278	25.1987	10.7669	14.2808	11.9896	5.10929	9.374	0.0463484	0.121512	0.381429	0.702885	NA
ENSMUSG00000002274	Metrn	7.53297	4.43832	15.3417	12.1327	5.79754	11.6031	7.62972	14.306	9.84777	-0.00338534	0.150001	-0.0225688	0.981994	NA
ENSMUSG00000002279	Lmf1	302.395	297.368	263.877	219.322	159.018	174.94	221.262	169.628	225.976	-0.465857	0.142236	-3.27524	0.00105571	0.0628181
ENSMUSG00000002280	Narfl	229.217	262.971	242.399	206.256	252.607	224.03	197.283	265.683	235.056	0.000384686	0.134865	0.00285237	0.997724	0.999644
ENSMUSG00000002289	Angptl4	154.964	140.917	54.2074	70.9297	43.0674	135.668	102.456	47.0055	93.6518	-0.15519	0.177177	-0.875908	0.38108	0.807678
ENSMUSG00000002297	Dbf4	157.116	176.423	221.943	197.857	233.558	203.501	168.944	174.738	191.76	0.0421382	0.14603	0.288558	0.77292	0.954593
ENSMUSG00000002307	Daxx	303.471	180.862	199.442	251.054	159.846	126.742	151.504	131.82	188.093	-0.539784	0.153462	-3.51737	0.000435838	0.0367028
ENSMUSG00000002308	Cd320	32.2841	41.0545	39.8885	43.8644	45.5521	30.3467	53.408	37.8087	40.5259	0.0465471	0.177849	0.261723	0.793535	0.959274
ENSMUSG00000002319	Ipo4	403.552	406.107	317.062	403.179	337.085	233.848	288.839	278.967	333.58	-0.354986	0.132758	-2.67393	0.00749673	0.17918
ENSMUSG00000002320	Tm9sf1	483.186	489.325	551.279	508.641	522.607	548.918	598.388	552.825	531.896	0.116102	0.10318	1.12524	0.260489	0.7271
ENSMUSG00000002325	Irf9	746.84	493.764	581.962	625.301	514.324	556.058	567.869	534.432	577.569	-0.14938	0.122017	-1.22426	0.220855	0.69067
ENSMUSG00000002326	Gmpr2	391.714	533.709	500.14	506.774	488.65	537.315	521.001	430.202	488.688	0.0286637	0.121637	0.235649	0.813705	0.961923
ENSMUSG00000002329	Mdp1	292.71	261.861	321.153	237.055	243.497	255.269	328.078	271.814	276.43	-0.0166533	0.135196	-0.123179	0.901965	0.981186
ENSMUSG00000002332	Dhrs1	815.713	582.53	703.673	555.305	603.772	639.958	595.118	625.377	640.181	-0.0936565	0.12198	-0.767799	0.442606	0.843202
ENSMUSG00000002342	Tmem161a	85.0149	188.629	162.622	181.057	155.705	154.411	151.504	178.825	157.221	0.0358632	0.165243	0.217034	0.828182	0.966776
ENSMUSG00000002343	Armc6	36.5887	33.2874	58.2985	65.33	37.2699	42.8424	61.0378	59.2677	49.2403	0.0213017	0.178434	0.119381	0.904973	0.981186
ENSMUSG00000002345	Borcs8	64.5683	67.6845	75.6858	73.7296	73.7115	75.8667	98.0964	52.1147	72.6822	0.0570432	0.170191	0.335172	0.737495	0.944877
ENSMUSG00000002346	Slc25a42	1.07614	12.2054	25.5695	29.8651	9.11042	28.5616	18.5293	7.153	16.5088	-0.0234579	0.140603	-0.166838	0.867497	NA
ENSMUSG00000002365	Snx9	1806.84	1891.84	2012.83	2008.43	1829.54	2159.08	2111.25	2144.88	1995.59	0.0879109	0.0902516	0.974065	0.330024	0.778201
ENSMUSG00000002372	Ranbp3	518.699	528.161	397.862	529.173	524.263	421.283	439.254	527.279	485.747	-0.0390441	0.124672	-0.313175	0.754148	0.947644
ENSMUSG00000002379	Ndufa11	556.363	644.667	677.081	555.305	515.981	505.183	660.516	459.836	571.866	-0.15906	0.124284	-1.27981	0.200611	0.663826
ENSMUSG00000002393	Nr2f6	117.299	84.3282	146.258	139.993	159.018	141.023	106.816	129.776	128.064	0.0977926	0.162505	0.601781	0.54732	0.887801
ENSMUSG00000002395	Use1	779.124	667.968	587.076	496.508	423.22	441.812	536.26	468.011	549.997	-0.366574	0.13157	-2.78614	0.00533397	0.147642
ENSMUSG00000002396	Ocel1	163.573	163.108	170.804	183.857	142.454	162.444	155.864	189.044	166.394	-0.0577978	0.139257	-0.415046	0.678108	0.92704
ENSMUSG00000002409	Dyrk1b	55.9592	24.4108	24.5467	30.7984	24.0184	22.3137	29.4289	25.5464	29.6278	-0.186336	0.177485	-1.04987	0.293777	NA
ENSMUSG00000002413	Braf	337.907	242.998	225.012	245.454	268.343	299.004	190.743	285.098	261.82	-0.00702013	0.149195	-0.0470532	0.962471	0.993028
ENSMUSG00000002416	Ndufb2	297.014	266.299	230.126	223.989	178.895	181.188	252.871	133.863	220.531	-0.336278	0.154235	-2.18029	0.0292356	0.331101
ENSMUSG00000002428	Hltf	269.035	320.669	268.991	353.715	391.748	228.493	280.12	316.776	303.693	0.0047678	0.146914	0.032453	0.974111	0.995193
ENSMUSG00000002455	Prpf6	427.227	373.929	518.55	491.841	524.263	423.961	386.936	466.989	451.712	-0.00610097	0.129059	-0.0472728	0.962296	0.993028
ENSMUSG00000002458	Rgs19	757.601	695.707	802.883	684.098	755.336	752.419	856.709	818.508	765.408	0.103843	0.100526	1.033	0.301606	0.761641
ENSMUSG00000002475	Abhd3	26.9035	31.0683	11.2506	14.9326	30.6441	19.6361	33.7888	61.3115	28.6919	0.282164	0.171674	1.6436	0.100258	NA
ENSMUSG00000002477	Snrpd1	399.247	321.779	366.156	305.184	307.269	284.723	350.967	245.246	322.571	-0.19061	0.133231	-1.43067	0.152525	0.607235
ENSMUSG00000002486	Tchp	88.2433	120.944	68.5263	44.7977	47.2085	47.3051	43.5984	68.4645	66.136	-0.34403	0.178198	-1.93061	0.0535316	0.423628
ENSMUSG00000002489	Tiam1	170.03	175.314	188.192	288.385	168.129	123.172	176.574	118.535	176.041	-0.347534	0.162179	-2.1429	0.0321212	0.346567
ENSMUSG00000002496	Tsc2	315.308	218.587	322.176	564.638	571.472	381.119	384.756	429.18	398.404	0.213439	0.166615	1.28103	0.200182	0.663474
ENSMUSG00000002504	Slc9a3r2	173.258	174.204	143.189	114.794	218.65	276.69	298.649	239.115	204.819	0.600362	0.148559	4.04124	5.31683e-05	0.00996855
ENSMUSG00000002524	Puf60	1416.2	1533.44	1465.65	1328.07	1347.51	1296.87	1388.61	1375.42	1393.97	-0.0811807	0.0863862	-0.939741	0.34735	0.786859
ENSMUSG00000002546	Golga2	234.598	199.725	255.695	405.046	318.865	285.616	282.3	298.382	285.028	0.0839068	0.155161	0.540774	0.588664	0.901784
ENSMUSG00000002550	Uck1	290.557	331.765	343.654	298.651	361.104	334.706	335.708	346.41	330.319	0.110086	0.114752	0.959335	0.33739	0.780774
ENSMUSG00000002580	Mien1	341.136	295.149	363.087	232.388	261.717	261.517	304.099	266.705	290.725	-0.139863	0.137995	-1.01353	0.310806	0.767645
ENSMUSG00000002602	Axl	1632.5	1646.62	1690.66	2305.22	2155.03	2229.59	1613.14	2047.8	1915.07	0.124705	0.124579	1.00101	0.316824	0.770525
ENSMUSG00000002603	Tgfb1	559.592	619.146	522.641	776.494	700.674	665.842	575.499	637.639	632.191	0.0497726	0.12505	0.398023	0.690613	0.931502
ENSMUSG00000002608	Ccdc97	206.619	269.628	223.989	232.388	204.57	232.955	210.362	234.005	226.815	-0.0676837	0.13061	-0.518213	0.60431	0.905736
ENSMUSG00000002617	Zfp40	81.7865	113.177	86.9364	58.797	79.5091	111.569	107.906	143.06	97.8426	0.241099	0.171467	1.4061	0.159695	0.616998
ENSMUSG00000002625	Akap8l	253.969	355.066	245.467	289.319	287.392	265.98	271.4	316.776	285.671	-0.00198545	0.134324	-0.014781	0.988207	0.998253
ENSMUSG00000002635	Pdcd2l	308.852	336.203	331.381	252.92	238.527	320.425	324.808	276.923	298.755	-0.0689187	0.134865	-0.511021	0.609336	0.908443
ENSMUSG00000002658	Gtf2f1	599.409	620.256	710.833	727.029	741.257	664.057	638.717	623.333	665.611	0.0049487	0.108224	0.0457264	0.963528	0.993317
ENSMUSG00000002660	Clpp	192.629	210.82	190.237	177.324	139.141	179.402	219.082	190.066	187.338	-0.0684065	0.144953	-0.471921	0.636983	0.915145
ENSMUSG00000002661	Alkbh7	72.1013	117.616	63.4124	51.3307	67.0858	49.9828	78.4771	52.1147	69.015	-0.167405	0.177151	-0.944984	0.344667	0.785038
ENSMUSG00000002668	Dennd1c	529.46	548.133	397.862	508.641	462.147	402.54	386.936	421.005	457.09	-0.212162	0.121846	-1.74123	0.0816434	0.492745
ENSMUSG00000002679	Med6	246.436	153.122	195.351	153.059	164.816	155.304	209.272	154.301	178.957	-0.0974382	0.155466	-0.626748	0.530824	0.880145
ENSMUSG00000002699	Lcp2	2879.75	3023.61	2553.88	2767.19	2625.46	2497.35	2662.77	2573.04	2697.88	-0.10898	0.0837363	-1.30147	0.193099	0.651996
ENSMUSG00000002718	Cse1l	578.962	700.146	675.035	852.09	764.447	697.081	701.934	843.033	726.591	0.0855895	0.121057	0.707017	0.479556	0.857963
ENSMUSG00000002728	Naa20	784.505	639.119	899.024	579.57	799.232	735.461	885.048	864.492	773.306	0.151438	0.127682	1.18606	0.2356	0.703715
ENSMUSG00000002731	Prkra	178.639	156.451	177.964	131.593	95.2453	192.791	155.864	159.41	155.995	-0.0680104	0.16307	-0.417063	0.676632	0.926593
ENSMUSG00000002732	Fkbp7	112.995	75.4515	98.187	72.7963	95.2453	141.915	178.753	132.841	113.523	0.406238	0.168221	2.41491	0.0157392	0.258022
ENSMUSG00000002733	Plekha3	258.273	315.121	365.133	390.113	322.177	409.68	415.275	425.093	362.608	0.19768	0.136637	1.44675	0.147968	0.603095
ENSMUSG00000002741	Ykt6	549.907	483.777	547.188	583.303	824.907	722.072	635.447	708.147	631.844	0.372683	0.111228	3.35061	0.000806333	0.0541388
ENSMUSG00000002748	Baz1b	320.689	482.668	317.062	416.245	457.177	342.739	275.76	366.847	372.398	-0.0693669	0.148913	-0.465823	0.641342	0.915145
ENSMUSG00000002763	Pex6	136.67	144.246	164.668	203.456	136.656	170.477	114.446	199.262	158.735	-0.0473157	0.16042	-0.294949	0.768033	0.952103
ENSMUSG00000002767	Mrpl2	309.928	299.587	253.65	300.518	280.766	331.136	336.798	285.098	299.685	0.072063	0.123885	0.581695	0.560772	0.891868
ENSMUSG00000002768	Mea1	324.994	298.477	402.976	301.451	314.723	300.789	366.227	293.273	325.364	-0.0503437	0.12986	-0.387677	0.698255	0.93348
ENSMUSG00000002771	Grin2d	6.45683	11.0958	7.15947	15.8659	9.93863	5.3553	4.35984	11.2404	8.93402	-0.0864029	0.14797	-0.583921	0.559274	NA
ENSMUSG00000002778	Kdelr1	292.71	269.628	275.128	226.788	261.717	241.881	331.348	321.885	277.636	0.0982962	0.135365	0.726158	0.467742	0.853453
ENSMUSG00000002781	Tmem143	17.2182	28.8491	20.4556	11.1994	16.5644	23.2063	32.6988	37.8087	23.5001	0.188034	0.173129	1.08609	0.277439	NA
ENSMUSG00000002797	Ggct	18.2943	27.7395	33.7518	27.0653	27.3312	30.3467	26.159	26.5683	27.157	0.0224831	0.178548	0.125922	0.899793	NA
ENSMUSG00000002799	Jag2	12.9137	14.4246	15.3417	49.4641	14.908	35.702	21.7992	61.3115	28.2331	0.15069	0.161764	0.931543	0.351573	NA
ENSMUSG00000002803	Btbd6	67.7967	94.3144	65.458	60.6636	94.417	66.9412	71.9374	79.7049	75.1541	0.0821736	0.168975	0.486305	0.626751	0.912188
ENSMUSG00000002804	Nudt14	114.071	139.807	141.144	127.86	123.405	103.536	129.705	133.863	126.674	-0.0730645	0.148738	-0.49123	0.623264	0.91079
ENSMUSG00000002808	Epdr1	12.9137	8.87665	14.3189	33.5983	11.5951	16.9584	25.0691	10.2186	16.6936	-0.0401273	0.160905	-0.249385	0.803063	NA
ENSMUSG00000002812	Flii	1614.21	1666.59	1819.53	2219.35	1890	1711.91	1496.52	1671.76	1761.23	-0.0998951	0.113008	-0.883966	0.376715	0.805182
ENSMUSG00000002814	Top3a	154.964	259.642	106.369	199.723	201.257	170.477	175.484	162.475	178.799	-0.0140679	0.166895	-0.0842919	0.932824	0.986188
ENSMUSG00000002820	Atg4d	185.096	178.643	135.007	168.925	216.165	182.973	187.473	200.284	181.821	0.193841	0.139656	1.38799	0.165139	0.624428
ENSMUSG00000002825	Qtrt1	130.213	138.698	142.167	93.3285	137.484	138.345	131.885	113.426	128.193	0.0381401	0.154376	0.247059	0.804862	0.961365
ENSMUSG00000002833	Hdgfrp2	274.415	244.108	220.921	281.852	220.306	217.782	215.812	203.35	234.818	-0.214569	0.127943	-1.67706	0.0935298	0.522832
ENSMUSG00000002835	Chaf1a	95.7763	61.027	67.5035	110.128	94.417	62.4785	54.498	97.0765	80.3631	-0.0696297	0.175403	-0.396971	0.691389	0.931502
ENSMUSG00000002844	Adprh	967.448	753.406	1004.37	873.555	787.637	780.088	828.37	773.546	846.053	-0.165384	0.106911	-1.54693	0.121879	0.572631
ENSMUSG00000002845	Tmem39a	95.7763	152.013	132.962	181.057	99.3863	115.139	117.716	139.995	129.255	-0.178853	0.163315	-1.09514	0.273455	0.739678
ENSMUSG00000002846	Timmdc1	1.07614	6.65749	22.5012	19.599	7.45398	6.24785	8.71968	7.153	9.92604	-0.13226	0.136012	-0.972412	0.330846	NA
ENSMUSG00000002847	Pla1a	17.2182	0	2.04556	21.4656	16.5644	31.2392	27.249	4.08743	14.9837	0.132472	0.124911	1.06053	0.288903	NA
ENSMUSG00000002870	Mcm2	413.237	404.997	415.249	686.898	429.846	622.107	512.281	550.781	504.425	0.107043	0.148853	0.719115	0.47207	0.855078
ENSMUSG00000002871	Tpra1	529.46	595.845	585.031	475.042	515.153	456.093	426.174	531.366	514.27	-0.157149	0.116765	-1.34586	0.178346	0.636337
ENSMUSG00000002881	Nab1	942.697	964.226	1102.56	1536.19	1391.41	1499.48	1238.19	1321.26	1249.5	0.219415	0.131268	1.6715	0.0946225	0.525149
ENSMUSG00000002885	Adgre5	3838.58	4884.38	4165.79	5259.06	5414.9	4247.64	4055.74	5368.84	4654.37	0.063539	0.119253	0.53281	0.594165	0.90322
ENSMUSG00000002897	Il17ra	895.347	1136.21	775.268	1261.8	1229.08	1089.8	1127.02	1113.82	1078.54	0.139467	0.12799	1.08967	0.27586	0.739678
ENSMUSG00000002900	Lamb1	0	0	1.02278	29.8651	1.65644	2.67765	38.1486	0	9.17133	0.00990323	0.0524294	0.188887	0.850181	NA
ENSMUSG00000002910	Arrdc2	91.4717	88.7665	61.3669	78.396	139.969	91.04	95.9165	117.514	95.555	0.327668	0.165831	1.97592	0.048164	0.406822
ENSMUSG00000002944	Cd36	13038.5	13035.4	16275.5	9734.17	17304	15552.7	16952.1	15276.8	14646.1	0.279707	0.120272	2.32562	0.0200387	0.284464
ENSMUSG00000002948	Map2k7	120.527	134.259	86.9364	107.328	145.767	105.321	103.546	95.0328	112.34	0.004952	0.162775	0.0304223	0.97573	0.995874
ENSMUSG00000002949	Timm44	328.222	210.82	219.898	298.651	217.822	268.657	238.701	364.803	268.447	0.0312513	0.155871	0.200494	0.841094	0.969375
ENSMUSG00000002957	Ap2a2	2920.64	2507.65	2556.95	3635.15	2920.3	2938.27	2759.78	3274.03	2939.1	0.02925	0.114823	0.254741	0.798924	0.961365
ENSMUSG00000002963	Pnkp	272.263	270.738	287.401	335.049	309.754	303.467	316.088	284.076	297.355	0.0492578	0.120807	0.407739	0.683465	0.927892
ENSMUSG00000002968	Med25	248.588	228.574	343.654	422.778	356.963	387.366	337.888	370.934	337.093	0.172437	0.149578	1.15282	0.248984	0.71363
ENSMUSG00000002980	Bcam	45.1978	104.301	91.0275	63.4634	81.1655	58.9083	94.8265	98.0983	79.6235	0.0758178	0.176303	0.430043	0.667164	0.923904
ENSMUSG00000002981	Clptm1	1677.7	1877.41	1841.01	1951.5	2084.63	2074.28	1908.52	2021.23	1929.54	0.130271	0.085487	1.52387	0.12754	0.577312
ENSMUSG00000002983	Relb	547.754	669.077	737.425	763.428	708.128	735.461	546.07	606.983	664.291	-0.0556665	0.125847	-0.442336	0.658246	0.921337
ENSMUSG00000002984	Tomm40	269.035	254.094	283.31	340.649	268.343	224.922	297.559	268.749	275.833	-0.0980407	0.132798	-0.738269	0.460351	0.849804
ENSMUSG00000002985	Apoe	99009	109014	108225	55979.4	103811	81052.4	100750	107431	95659	0.0628304	0.142933	0.439579	0.660242	0.921858
ENSMUSG00000002996	Hbp1	2142.59	2012.78	2496.61	1931.9	2444.9	2202.81	1879.09	2125.46	2154.52	0.0107324	0.107609	0.0997357	0.920554	0.983522
ENSMUSG00000002997	Prkar2b	387.41	311.792	402.976	442.377	455.521	473.051	467.593	418.962	419.96	0.200811	0.121407	1.65403	0.0981206	0.526899
ENSMUSG00000003031	Cdkn1b	87.1672	77.6707	87.9592	137.193	53.0061	50.8753	63.2177	59.2677	77.0446	-0.51065	0.170881	-2.98833	0.00280506	0.107339
ENSMUSG00000003032	Klf4	1217.11	1109.58	1201.77	871.689	1182.7	1027.32	1099.77	1110.76	1102.59	0.00649344	0.112576	0.0576803	0.954003	0.991987
ENSMUSG00000003033	Ap1m1	1006.19	1003.06	963.46	1094.74	1203.4	1006.8	1131.38	1071.93	1060.12	0.108538	0.0955712	1.13568	0.256092	0.723737
ENSMUSG00000003037	Rab8a	1524.89	1610	1612.93	1542.72	1422.05	1398.62	1377.71	1648.26	1517.15	-0.0983816	0.090798	-1.08352	0.278577	0.739678
ENSMUSG00000003038	Hmgn2	1457.09	1507.92	1590.42	1672.45	1274.63	1651.22	1738.49	1611.47	1562.96	0.00919651	0.106751	0.0861491	0.931348	0.985707
ENSMUSG00000003039	Fam32a	867.367	757.844	826.407	708.364	662.576	680.123	703.024	791.94	749.706	-0.140403	0.105854	-1.32637	0.184716	0.641337
ENSMUSG00000003062	Stard3nl	1232.18	1150.64	1266.2	942.618	956.594	1223.69	1280.7	1315.13	1170.97	0.0491917	0.119995	0.409947	0.681845	0.927576
ENSMUSG00000003068	Stk11	182.943	175.314	81.8225	82.1291	81.1655	116.031	119.896	116.492	119.474	-0.157196	0.175932	-0.893504	0.371587	0.802361
ENSMUSG00000003070	Efna2	1.07614	6.65749	4.09112	13.066	4.1411	0.892549	8.71968	5.10929	5.46917	-0.0511902	0.116675	-0.438741	0.660849	NA
ENSMUSG00000003072	Atp5d	1098.74	1170.61	1227.34	1134.88	959.906	863.095	997.313	790.918	1030.35	-0.327773	0.100764	-3.25286	0.00114249	0.0644289
ENSMUSG00000003099	Ppp5c	263.654	288.491	276.151	264.12	323.834	303.467	268.13	354.585	292.804	0.168556	0.123358	1.36639	0.171816	0.631786
ENSMUSG00000003119	Cdk12	238.903	370.6	223.989	254.787	238.527	321.318	206.002	220.721	259.356	-0.104212	0.154875	-0.672876	0.501026	0.865626
ENSMUSG00000003123	Lipe	161.421	177.533	98.187	174.524	144.11	134.775	100.276	139.995	141.353	-0.165157	0.162991	-1.01329	0.310921	0.767645
ENSMUSG00000003131	Pafah1b2	1014.8	954.24	1052.44	1098.48	1067.58	1270.1	1020.2	1120.98	1074.85	0.110171	0.100109	1.10051	0.27111	0.739002
ENSMUSG00000003134	Tbc1d8	134.517	137.588	98.187	260.387	231.901	159.766	116.626	146.126	160.637	0.0317846	0.175772	0.180829	0.856502	0.974315
ENSMUSG00000003135	Cnot11	189.4	150.903	155.463	189.457	149.08	216.889	185.293	179.847	177.042	0.0724222	0.145946	0.496225	0.619735	0.909781
ENSMUSG00000003153	Slc2a3	87.1672	39.9449	64.4352	236.121	122.576	50.8753	77.3872	52.1147	91.3278	-0.189051	0.173504	-1.0896	0.275889	0.739678
ENSMUSG00000003154	Foxj2	312.08	269.628	252.627	481.575	601.287	351.664	272.49	414.874	369.528	0.214084	0.167744	1.27625	0.201865	0.66554
ENSMUSG00000003161	Sri	1957.5	1825.26	2082.38	1675.25	1753.34	1858.29	1937.95	1719.79	1851.22	-0.0487841	0.0947442	-0.514904	0.60662	0.907419
ENSMUSG00000003166	Dgcr2	219.532	314.011	277.174	304.251	362.76	292.756	284.48	396.481	306.431	0.211853	0.140157	1.51154	0.130651	0.581926
ENSMUSG00000003184	Irf3	248.588	373.929	316.039	310.784	247.638	262.41	334.618	307.579	300.198	-0.0967498	0.138727	-0.697409	0.485547	0.860469
ENSMUSG00000003190	Bcl2l12	46.2739	46.6024	63.4124	47.5976	37.2699	37.4871	46.8683	26.5683	44.01	-0.261448	0.177167	-1.47572	0.14002	0.596341
ENSMUSG00000003198	Zfp959	89.3195	69.9036	54.2074	59.7303	84.4784	91.9326	91.5566	114.448	81.9471	0.327305	0.167581	1.95311	0.0508067	0.417956
ENSMUSG00000003199	Mpnd	716.708	696.817	665.83	596.369	615.367	588.19	572.229	608.005	632.44	-0.151027	0.100997	-1.49536	0.134819	0.588059
ENSMUSG00000003200	Sh3gl1	893.195	576.982	874.478	872.622	780.183	722.072	921.016	774.568	801.89	-0.00825758	0.130096	-0.0634731	0.94939	0.990623
ENSMUSG00000003206	Ebi3	451.978	399.449	312.971	305.184	272.484	391.829	407.645	376.044	364.698	-0.0172654	0.144208	-0.119726	0.9047	0.981186
ENSMUSG00000003208	Ccdc94	81.7865	58.8078	54.2074	38.2647	65.4293	64.2636	62.1277	72.5519	62.1799	0.11278	0.17458	0.646009	0.518274	0.8739
ENSMUSG00000003226	Ranbp2	554.211	613.598	620.828	775.56	689.079	863.095	519.911	634.574	658.857	0.0643852	0.137226	0.469191	0.638933	0.915145
ENSMUSG00000003228	Grk5	57.0353	46.6024	73.6402	59.7303	82.822	46.4126	40.3285	27.5902	54.2702	-0.129689	0.178746	-0.725548	0.468116	0.853453
ENSMUSG00000003233	Dvl3	76.4058	119.835	81.8225	127.86	88.6195	108.891	74.1173	73.5738	93.8906	-0.152308	0.169734	-0.897333	0.369541	0.800727
ENSMUSG00000003234	Abcf3	305.623	329.546	308.88	381.714	383.466	366.838	321.538	438.377	354.498	0.159878	0.126592	1.26294	0.206612	0.671389
ENSMUSG00000003235	Eif2b5	290.557	317.34	402.976	481.575	344.539	399.862	413.095	388.306	379.781	0.0391	0.140337	0.278615	0.78054	0.957087
ENSMUSG00000003269	Cyth2	489.643	547.024	539.006	498.374	535.03	443.597	473.043	539.541	508.157	-0.0522362	0.10951	-0.476998	0.633363	0.914122
ENSMUSG00000003283	Hck	1452.79	1270.47	1163.92	1288.87	1113.96	1211.19	954.805	1336.59	1224.07	-0.146072	0.113273	-1.28956	0.197204	0.659532
ENSMUSG00000003299	Mrpl4	771.591	805.556	720.038	651.433	646.011	601.578	684.495	591.656	684.045	-0.202334	0.105637	-1.91536	0.0554464	0.429208
ENSMUSG00000003308	Keap1	261.502	251.875	243.422	246.387	294.018	247.236	267.04	232.984	255.558	0.0475045	0.124217	0.382431	0.702142	0.934778
ENSMUSG00000003316	Glg1	1255.85	1239.4	1243.7	1790.97	1345.86	1121.93	1023.47	1129.15	1268.79	-0.221656	0.125837	-1.76146	0.0781614	0.483408
ENSMUSG00000003344	Btbd2	81.7865	85.4378	73.6402	109.194	49.6932	56.2306	57.7679	43.9399	69.7113	-0.501884	0.168742	-2.97426	0.00293693	0.110129
ENSMUSG00000003345	Csnk1g2	260.425	391.682	334.449	441.444	394.233	290.079	309.549	299.404	340.158	-0.112739	0.145662	-0.773973	0.438947	0.842259
ENSMUSG00000003346	Abhd17a	611.246	606.941	692.423	730.763	646.011	527.497	595.118	677.492	635.936	-0.0990684	0.113221	-0.875003	0.381572	0.808289
ENSMUSG00000003348	Mob3a	370.192	316.231	422.409	442.377	371.042	390.044	393.476	452.683	394.807	0.0419354	0.126064	0.332652	0.739397	0.945683
ENSMUSG00000003360	Ddx23	30.1319	36.6162	19.4328	23.3321	22.3619	21.4212	23.9791	27.5902	25.6082	-0.0896031	0.177951	-0.503526	0.614595	NA
ENSMUSG00000003363	Pld3	4495.03	4225.29	5343.01	3226.37	3890.15	4729.62	4400.17	4256.04	4320.71	-0.000934744	0.122493	-0.00763098	0.993911	0.999512
ENSMUSG00000003380	Rabac1	1485.07	1816.38	1624.18	1140.47	1321.01	1291.52	1484.53	1343.74	1438.36	-0.135832	0.121507	-1.1179	0.263611	0.728868
ENSMUSG00000003382	Etv3	2461.13	2759.53	1783.73	3051.84	2390.24	2477.72	2124.33	2214.37	2407.86	-0.108266	0.127379	-0.849957	0.395349	0.816753
ENSMUSG00000003402	Prkcsh	309.928	346.189	305.811	373.314	357.791	258.839	371.676	294.295	327.231	-0.0492192	0.133454	-0.368811	0.712269	0.936563
ENSMUSG00000003418	St8sia6	145.279	235.231	197.397	157.725	212.852	189.22	155.864	226.852	190.053	0.0720895	0.154186	0.467549	0.640107	0.915145
ENSMUSG00000003420	Fcgrt	5877.87	6846.12	6862.86	4799.89	5806.65	6698.58	7896.76	6753.46	6442.77	0.135581	0.118603	1.14316	0.252973	0.71905
ENSMUSG00000003421	Nosip	422.922	375.038	391.725	384.514	366.901	367.73	376.036	389.328	384.274	-0.063035	0.107096	-0.588584	0.55614	0.890599
ENSMUSG00000003423	Pih1d1	379.877	365.052	332.404	363.981	332.116	280.26	312.819	348.453	339.37	-0.156686	0.117332	-1.3354	0.181744	0.639383
ENSMUSG00000003429	Rps11	2510.63	2532.06	2604	2020.56	1747.54	1780.64	2250.77	1572.64	2127.36	-0.34732	0.116638	-2.97777	0.00290353	0.109705
ENSMUSG00000003435	Supt5	761.906	995.294	691.4	1066.75	1017.05	848.814	694.305	1035.14	888.832	0.0265937	0.139437	0.190721	0.848744	0.971551
ENSMUSG00000003437	Paf1	978.21	1058.54	849.931	1180.61	887.023	888.979	809.84	868.579	940.214	-0.210862	0.109529	-1.92517	0.0542078	0.426118
ENSMUSG00000003438	Timm50	524.079	551.462	460.251	452.643	395.061	544.455	498.112	440.421	483.311	-0.0708988	0.123116	-0.575868	0.564705	0.893262
ENSMUSG00000003444	Med29	220.608	258.532	226.035	192.257	175.583	180.295	196.193	156.344	200.731	-0.279498	0.136791	-2.04325	0.0410273	0.386435
ENSMUSG00000003458	Ncstn	2354.59	2272.42	2461.83	2341.61	2605.58	2602.67	2405.54	2616.98	2457.65	0.111765	0.0780586	1.43181	0.152199	0.606904
ENSMUSG00000003464	Pex19	553.135	579.201	607.532	490.908	570.643	552.488	590.758	586.546	566.402	0.0404172	0.104578	0.386477	0.699143	0.93348
ENSMUSG00000003477	Inmt	10.7614	26.6299	4.09112	13.9993	28.1595	29.4541	19.6193	10.2186	17.8666	0.177074	0.158326	1.11841	0.26339	NA
ENSMUSG00000003484	Cyp4f18	1477.54	1537.88	1550.54	1219.8	1273.8	1187.98	995.134	1364.18	1325.86	-0.232182	0.114159	-2.03384	0.0419675	0.387426
ENSMUSG00000003500	Impdh1	290.557	356.176	380.474	466.643	347.852	341.846	426.174	382.175	373.987	0.00113885	0.136288	0.00835623	0.993333	0.999367
ENSMUSG00000003518	Dusp3	775.896	788.912	755.835	718.63	796.747	804.187	793.491	912.519	793.277	0.112348	0.095884	1.17171	0.241313	0.709655
ENSMUSG00000003526	Prodh	49.5024	51.0407	31.7062	36.3981	25.6748	29.4541	40.3285	64.377	41.0602	-0.0387147	0.178491	-0.2169	0.828287	0.966776
ENSMUSG00000003527	Dgcr14	224.913	203.053	197.397	256.654	219.478	200.824	253.961	248.311	225.574	0.050859	0.135405	0.375607	0.707209	0.935032
ENSMUSG00000003528	Slc25a1	283.024	311.792	347.746	351.849	332.944	327.566	283.39	242.18	310.061	-0.104744	0.131445	-0.796866	0.425529	0.837224
ENSMUSG00000003531	Dgcr6	147.431	148.684	192.283	147.459	163.159	181.188	164.584	178.825	165.452	0.0912728	0.14081	0.648197	0.516858	0.873239
ENSMUSG00000003541	Ier3	9933.83	9843.09	10029.4	7307.63	8747.66	7964.22	8705.51	8662.29	8899.2	-0.111436	0.104259	-1.06883	0.285144	0.745322
ENSMUSG00000003545	Fosb	675.815	640.228	775.268	716.763	918.496	658.701	785.861	840.989	751.515	0.167384	0.11606	1.44221	0.149242	0.603884
ENSMUSG00000003546	Klc4	423.998	517.065	355.928	396.646	453.864	387.366	402.195	431.224	421.036	-0.0127129	0.125477	-0.101316	0.919299	0.983522
ENSMUSG00000003549	Ercc1	185.096	194.177	211.716	164.258	206.227	152.626	182.023	153.279	181.175	-0.0956023	0.143268	-0.667297	0.504583	0.866791
ENSMUSG00000003559	As3mt	308.852	181.971	256.718	219.322	249.294	271.335	249.601	230.94	246.004	0.0404085	0.144451	0.279738	0.779678	0.956502
ENSMUSG00000003573	Homer3	118.375	98.7527	87.9592	83.9957	115.951	116.924	100.276	120.579	105.352	0.167618	0.155901	1.07516	0.282303	0.743284
ENSMUSG00000003575	Crtc1	18.2943	53.2599	58.2985	48.5308	74.5398	61.5859	62.1277	39.8524	52.0612	0.202187	0.178661	1.13168	0.257769	0.725344
ENSMUSG00000003581	Rnf215	134.517	221.916	185.123	196.923	206.227	213.319	168.944	187	189.246	0.0561288	0.1487	0.377463	0.70583	0.935032
ENSMUSG00000003604	Aven	49.5024	103.191	93.0731	93.3285	113.466	69.6188	77.3872	86.8579	85.8031	0.0223121	0.173842	0.128347	0.897875	0.981186
ENSMUSG00000003617	Cp	230.294	80.9994	211.716	145.593	210.368	325.781	269.22	203.35	209.665	0.367195	0.173531	2.11603	0.0343426	0.358093
ENSMUSG00000003623	Crot	474.577	388.353	505.254	431.178	573.956	602.471	509.011	628.442	514.155	0.319231	0.116445	2.74148	0.00611628	0.16112
ENSMUSG00000003644	Rps6ka1	1386.07	1525.67	1454.39	1659.38	1758.31	1362.03	1374.44	1732.05	1531.54	0.0424416	0.110113	0.385435	0.699915	0.93405
ENSMUSG00000003660	Snrnp200	702.718	581.421	453.092	888.488	781.011	650.668	425.084	536.475	627.37	-0.0975185	0.158128	-0.616705	0.537429	0.883885
ENSMUSG00000003662	Ciao1	278.72	281.834	263.877	218.389	263.374	252.591	246.331	219.699	253.102	-0.0710079	0.129136	-0.549868	0.58241	0.899319
ENSMUSG00000003665	Has1	170.03	98.7527	110.46	133.46	111.81	33.0243	71.9374	31.6776	95.144	-0.500409	0.178649	-2.80107	0.00509332	0.143785
ENSMUSG00000003680	Taf6l	792.038	712.351	857.09	629.968	573.128	659.594	717.194	580.415	690.222	-0.211213	0.11889	-1.77655	0.0756431	0.480309
ENSMUSG00000003721	Insig2	312.08	328.436	306.834	259.453	317.208	411.465	275.76	341.3	319.067	0.132388	0.134313	0.985665	0.324298	0.776445
ENSMUSG00000003731	Kpna6	152.812	92.0952	121.711	127.86	88.6195	125.849	115.536	194.153	127.329	0.0523981	0.170886	0.306626	0.759128	0.948623
ENSMUSG00000003746	Man1a	1492.6	1284.9	1304.05	1715.38	1675.49	1683.35	1534.66	1604.32	1536.84	0.148657	0.105329	1.41137	0.158137	0.615183
ENSMUSG00000003752	Itpkc	272.263	181.971	203.533	258.52	201.257	168.692	165.674	169.628	202.692	-0.298324	0.145283	-2.0534	0.0400336	0.382409
ENSMUSG00000003762	Coq8b	214.151	169.766	247.513	163.325	178.895	154.411	177.663	207.437	189.145	-0.113451	0.149198	-0.76041	0.44701	0.845278
ENSMUSG00000003778	Brd8	334.679	267.409	272.06	390.113	477.054	266.872	369.496	352.541	341.278	0.163702	0.150964	1.08438	0.278196	0.739678
ENSMUSG00000003779	Kif20a	160.345	199.725	133.984	269.72	189.662	219.567	231.072	302.47	213.318	0.211415	0.163394	1.29389	0.195703	0.656329
ENSMUSG00000003808	Farsa	316.385	288.491	336.495	324.783	361.104	293.649	265.95	310.645	312.188	-0.0331187	0.125335	-0.264242	0.791593	0.958929
ENSMUSG00000003809	Gcdh	88.2433	166.437	111.483	108.261	125.889	107.106	100.276	119.557	115.907	-0.0448452	0.164043	-0.273374	0.784566	0.957256
ENSMUSG00000003810	Mast2	149.583	331.765	211.716	418.112	342.883	311.5	279.03	322.907	295.937	0.116658	0.169226	0.689363	0.490595	0.861508
ENSMUSG00000003812	Dnase2a	414.313	355.066	498.094	385.447	472.913	466.803	438.164	419.984	431.348	0.105532	0.121405	0.869256	0.384707	0.809917
ENSMUSG00000003813	Rad23a	527.308	398.34	517.527	435.844	360.276	365.053	329.168	376.044	413.695	-0.341572	0.120484	-2.83501	0.00458245	0.138407
ENSMUSG00000003814	Calr	4455.21	3840.26	4072.71	5133.07	3901.74	3786.19	3963.09	3504.97	4082.16	-0.189803	0.100382	-1.8908	0.058651	0.440858
ENSMUSG00000003824	Syce2	100.081	134.259	122.734	105.461	91.9324	107.998	107.906	64.377	104.344	-0.218229	0.163878	-1.33166	0.182973	0.640236
ENSMUSG00000003847	Nfat5	398.171	372.819	259.786	270.653	316.38	316.855	221.262	262.617	302.318	-0.168846	0.14852	-1.13686	0.255598	0.7232
ENSMUSG00000003848	Nob1	175.411	242.998	230.126	277.186	192.975	166.014	217.992	190.066	211.596	-0.216836	0.145246	-1.49289	0.135467	0.588059
ENSMUSG00000003849	Nqo1	6.45683	1.10958	14.3189	11.1994	3.31288	4.46275	13.0795	8.17486	7.76435	-0.0335228	0.130448	-0.256982	0.797192	NA
ENSMUSG00000003865	Gys1	179.715	108.739	118.643	127.86	110.981	109.784	103.546	99.1202	119.799	-0.245527	0.15846	-1.54946	0.121272	0.570856
ENSMUSG00000003868	Ruvbl2	192.629	224.135	227.057	256.654	221.135	248.129	288.839	217.656	234.529	0.0929309	0.136621	0.68021	0.496371	0.862341
ENSMUSG00000003873	Bax	1047.08	978.651	1057.56	792.359	802.545	722.965	894.857	718.366	876.798	-0.267886	0.115877	-2.31181	0.0207883	0.289368
ENSMUSG00000003882	Il7r	239.979	282.943	332.404	398.513	236.871	182.973	150.414	134.885	244.873	-0.604638	0.158597	-3.81243	0.000137609	0.0183261
ENSMUSG00000003923	Tfam	118.375	94.3144	133.984	132.527	111.81	128.527	161.314	152.257	129.139	0.150999	0.156321	0.965956	0.334066	0.780329
ENSMUSG00000003929	Zfp81	32.2841	12.2054	37.8429	44.7977	54.6625	57.1232	41.4185	65.3989	43.2166	0.36131	0.17837	2.02562	0.0428033	0.390151
ENSMUSG00000003948	Mmd	228.141	187.519	146.258	191.324	139.969	165.122	155.864	195.175	176.171	-0.154433	0.150019	-1.02942	0.303281	0.763156
ENSMUSG00000003955	Fam162a	185.096	225.245	209.67	184.791	142.454	174.94	189.653	128.754	180.075	-0.26877	0.145839	-1.84292	0.0653402	0.455
ENSMUSG00000003970	Rpl8	1881.09	1970.62	1868.62	1661.25	1466.78	1537.86	1854.02	1457.17	1712.18	-0.204797	0.102686	-1.9944	0.0461081	0.402761
ENSMUSG00000003992	Ssbp2	281.948	281.834	355.928	258.52	345.368	232.063	293.199	311.667	295.066	0.00441788	0.139422	0.031687	0.974722	0.995356
ENSMUSG00000004018	Fancl	174.334	165.328	157.508	164.258	160.675	161.551	142.785	173.716	162.519	-0.0406522	0.135753	-0.299458	0.764591	0.950311
ENSMUSG00000004032	Gstm5	45.1978	67.6845	74.663	34.5316	62.9447	40.1647	73.0273	80.7268	59.8675	0.111288	0.178369	0.623921	0.53268	0.881844
ENSMUSG00000004040	Stat3	3543.72	3419.73	3141.98	4280.98	3597.79	3639.82	3604.5	3684.82	3614.17	0.0126584	0.099017	0.127841	0.898275	0.981186
ENSMUSG00000004043	Stat5a	260.425	241.889	295.584	413.445	304.785	275.798	360.777	298.382	306.386	0.0238421	0.1473	0.161861	0.871416	0.976571
ENSMUSG00000004044	Ptrf	222.761	259.642	258.764	284.652	341.226	265.98	283.39	303.492	277.488	0.185692	0.128524	1.44481	0.148512	0.603556
ENSMUSG00000004054	Map3k11	911.489	874.35	837.658	1331.8	1113.13	946.995	959.165	952.371	990.869	0.00467609	0.130325	0.0358801	0.971378	0.995099
ENSMUSG00000004056	Akt2	676.891	689.05	694.468	717.697	672.514	784.551	572.229	752.087	694.936	0.00203605	0.111615	0.0182417	0.985446	0.997695
ENSMUSG00000004069	Dnaja3	317.461	461.586	364.11	291.185	289.877	315.962	355.327	402.612	349.765	-0.0585871	0.142411	-0.411394	0.680784	0.927576
ENSMUSG00000004070	Hmox2	1054.62	1141.76	1240.63	824.091	988.894	1020.18	1248	1209.88	1091.01	0.0583198	0.124146	0.469769	0.63852	0.915145
ENSMUSG00000004071	Cdip1	349.745	341.751	295.584	289.319	303.957	362.375	349.877	322.907	326.939	0.0605587	0.121047	0.50029	0.616871	0.909576
ENSMUSG00000004085	Zak	229.217	181.971	201.488	254.787	309.754	210.642	209.272	231.962	228.637	0.117191	0.147267	0.795772	0.426165	0.837522
ENSMUSG00000004096	Cwc15	796.342	939.815	1088.24	872.622	720.551	788.121	913.387	687.71	850.848	-0.218036	0.119632	-1.82256	0.0683697	0.46217
ENSMUSG00000004098	Col5a3	23.675	25.5204	17.3873	83.9957	7.45398	73.189	31.6088	2.04372	33.1092	-0.0425452	0.110572	-0.384775	0.700404	0.934184
ENSMUSG00000004099	Dnmt1	457.359	347.299	305.811	478.775	360.276	294.541	249.601	398.524	361.523	-0.221217	0.149882	-1.47595	0.139958	0.596341
ENSMUSG00000004100	Ppan	136.67	146.465	170.804	215.589	187.178	157.089	192.923	156.344	170.383	0.0367364	0.151312	0.242787	0.808171	0.961365
ENSMUSG00000004105	Angptl2	45.1978	88.7665	105.346	195.057	135.828	91.04	130.795	79.7049	108.967	0.00353295	0.178741	0.0197658	0.98423	0.997582
ENSMUSG00000004127	Trmt10a	35.5126	24.4108	57.2757	61.5968	33.1288	52.6604	50.1382	31.6776	43.3001	-0.0473719	0.178532	-0.265341	0.790747	0.958689
ENSMUSG00000004151	Etv1	503.633	558.119	543.097	365.848	463.803	515.894	592.938	554.869	512.275	0.0926143	0.131659	0.703443	0.48178	0.85858
ENSMUSG00000004187	Kifc2	3.22841	4.43832	7.15947	15.8659	13.2515	17.851	8.71968	7.153	9.70841	0.124561	0.144708	0.860772	0.389364	NA
ENSMUSG00000004207	Psap	19154.2	18496.7	19285.6	22008.7	20749.4	18582	19140.8	20694.7	19764	0.00377082	0.0850974	0.0443118	0.964656	0.99371
ENSMUSG00000004221	Ikbkg	389.562	221.916	303.766	354.648	309.754	351.664	270.31	279.989	310.201	-0.0529131	0.146673	-0.360756	0.718282	0.938531
ENSMUSG00000004233	Wars2	136.67	89.8761	63.4124	51.3307	30.6441	30.3467	51.2281	74.5956	66.0129	-0.403923	0.178325	-2.26509	0.0235069	0.303755
ENSMUSG00000004264	Phb2	995.428	1026.36	1131.2	991.149	978.127	920.218	1004.94	921.716	996.142	-0.107456	0.0920748	-1.16705	0.24319	0.710399
ENSMUSG00000004266	Ptpn6	3148.78	2731.79	3111.3	2962.25	2967.51	3027.53	2644.24	3162.65	2969.51	-0.0171352	0.0897629	-0.190894	0.848609	0.971551
ENSMUSG00000004267	Eno2	61.3399	98.7527	34.7746	55.0638	48.0367	34.8094	35.9687	41.8962	51.3303	-0.322496	0.178698	-1.8047	0.0711209	0.471152
ENSMUSG00000004268	Emg1	478.881	438.285	596.281	449.844	438.128	427.531	550.43	479.251	482.329	-0.0447595	0.125708	-0.356058	0.721797	0.940162
ENSMUSG00000004270	Lpcat3	646.759	653.543	709.81	658.9	710.612	652.454	687.765	681.579	675.178	0.0312927	0.0942121	0.332152	0.739775	0.945683
ENSMUSG00000004285	Atp6v1f	1733.66	1537.88	1607.81	1089.14	1293.68	1234.4	1558.64	1211.92	1408.39	-0.14581	0.127854	-1.14044	0.254104	0.720516
ENSMUSG00000004317	Clcn5	246.436	422.75	348.768	405.046	477.054	428.424	305.189	458.814	386.56	0.178001	0.150543	1.18239	0.237052	0.705967
ENSMUSG00000004319	Clcn3	442.293	522.613	447.978	396.646	433.987	408.788	407.645	435.311	436.908	-0.0892505	0.114049	-0.782563	0.433884	0.83963
ENSMUSG00000004356	Utp20	78.5581	52.1503	91.0275	184.791	139.141	100.858	94.8265	153.279	111.829	0.137036	0.178499	0.767709	0.44266	0.843202
ENSMUSG00000004359	Spic	302.395	254.094	110.46	142.793	241.84	350.772	115.536	351.519	233.676	0.140516	0.171779	0.818006	0.413354	0.827957
ENSMUSG00000004364	Cul3	351.897	311.792	352.859	279.052	425.705	346.309	353.147	301.448	340.276	0.118743	0.130667	0.908744	0.363485	0.794569
ENSMUSG00000004383	Large	3.22841	7.76707	12.2734	6.533	13.2515	20.5286	7.62972	11.2404	10.3065	0.190233	0.151254	1.2577	0.2085	NA
ENSMUSG00000004393	Ddx56	380.953	318.45	416.272	338.783	260.889	379.333	418.545	363.781	359.626	-0.0277077	0.13927	-0.198949	0.842302	0.969904
ENSMUSG00000004394	Tmed4	726.393	684.612	737.425	653.3	586.379	639.065	743.353	641.727	676.532	-0.0931029	0.10566	-0.881155	0.378234	0.805688
ENSMUSG00000004446	Bid	429.379	437.175	365.133	359.315	459.662	367.73	447.974	378.087	405.557	0.0489683	0.122364	0.400186	0.689019	0.930785
ENSMUSG00000004451	Ralb	1613.13	1576.71	1634.4	1583.79	1413.77	1673.53	1644.75	1633.95	1596.75	-0.00930994	0.0880469	-0.105738	0.91579	0.983522
ENSMUSG00000004455	Ppp1cc	1294.59	1416.94	1345.98	1178.74	1288.71	1576.24	1470.36	1592.05	1395.45	0.163243	0.100942	1.6172	0.105835	0.542663
ENSMUSG00000004460	Dnajb11	1105.19	1017.49	1114.83	1254.34	1111.47	1130.86	1007.12	1186.38	1115.96	-0.0168552	0.0990298	-0.170204	0.86485	0.975149
ENSMUSG00000004462	Tbccd1	131.289	118.725	184.101	139.06	190.491	168.692	194.013	205.393	166.47	0.313647	0.148157	2.11699	0.0342605	0.357971
ENSMUSG00000004473	Clec11a	1.07614	12.2054	16.3645	24.2654	13.2515	22.3137	26.159	25.5464	17.6478	0.165449	0.153683	1.07656	0.281678	NA
ENSMUSG00000004500	Zfp324	18.2943	44.3832	15.3417	13.9993	14.908	6.24785	3.26988	33.7213	18.7707	-0.143472	0.148016	-0.969303	0.332394	NA
ENSMUSG00000004508	Gab2	440.141	369.491	407.067	482.509	418.251	345.417	287.749	355.606	388.279	-0.228478	0.130001	-1.7575	0.0788321	0.484845
ENSMUSG00000004530	Coro1c	3733.12	3499.62	4030.78	4467.64	4917.97	4377.06	4262.83	4851.78	4267.6	0.208533	0.0970984	2.14765	0.0317418	0.343593
ENSMUSG00000004535	Tax1bp1	2154.43	2023.88	2287.96	2336.95	2463.13	2258.15	2293.28	2412.61	2278.8	0.0927199	0.0847197	1.09443	0.273766	0.739678
ENSMUSG00000004552	Ctse	63.4922	47.712	36.8201	36.3981	29.8159	30.3467	14.1695	57.224	39.4973	-0.204323	0.176585	-1.15708	0.24724	0.713608
ENSMUSG00000004558	Ndrg2	8.60911	11.0958	11.2506	19.599	5.79754	16.9584	13.0795	19.4153	13.2257	0.0312788	0.15913	0.196561	0.844171	NA
ENSMUSG00000004561	Mettl17	50.5785	61.027	43.9796	84.929	62.9447	43.7349	68.6675	60.2896	59.5188	-0.0203103	0.176206	-0.115265	0.908235	0.98204
ENSMUSG00000004562	Arhgef40	41.9694	31.0683	40.9112	76.5294	26.503	45.52	42.5084	14.306	39.9145	-0.23335	0.175933	-1.32636	0.184722	0.641337
ENSMUSG00000004565	Pnpla6	63.4922	42.1641	57.2757	149.326	66.2576	60.6934	75.2072	113.426	78.4803	0.00422074	0.178475	0.0236488	0.981133	0.997534
ENSMUSG00000004567	Mcoln1	911.489	956.459	922.548	787.693	944.999	951.458	974.424	1049.45	937.315	0.121315	0.0976703	1.24208	0.214206	0.682695
ENSMUSG00000004568	Arhgef18	38.741	64.3557	51.139	97.0617	110.153	90.1475	70.8474	95.0328	77.1848	0.313195	0.176502	1.77446	0.0759871	0.480443
ENSMUSG00000004591	Pkn2	458.435	423.86	415.249	495.575	396.717	474.836	483.942	448.596	449.651	0.0062423	0.113768	0.0548684	0.956243	0.992263
ENSMUSG00000004609	Cd33	4451.98	4948.73	4194.42	3571.68	5530.85	5948.84	4681.38	5746.93	4884.35	0.315455	0.109181	2.88929	0.00386117	0.127159
ENSMUSG00000004610	Etfb	297.014	211.93	294.561	223.055	250.951	224.03	286.659	219.699	250.987	-0.0528262	0.141666	-0.372893	0.709228	0.935439
ENSMUSG00000004626	Stxbp2	962.068	956.459	979.824	1010.75	805.858	875.591	746.623	820.552	894.715	-0.247529	0.0921074	-2.68739	0.00720124	0.17582
ENSMUSG00000004631	Sgce	5.38069	21.082	30.6834	42.9311	33.1288	47.3051	39.2386	36.7869	32.0671	0.223719	0.170813	1.30973	0.190288	0.648897
ENSMUSG00000004633	Chn2	328.222	356.176	349.791	420.912	354.478	311.5	326.988	320.863	346.116	-0.1291	0.119247	-1.08262	0.278976	0.739812
ENSMUSG00000004637	Wwox	69.949	71.0132	79.7769	73.7296	88.6195	90.1475	75.2072	34.7432	72.8983	-0.0142896	0.17643	-0.0809927	0.935448	0.986777
ENSMUSG00000004642	Slbp	1510.9	1534.55	1485.08	1352.33	1316.04	1404.87	1658.92	1607.38	1483.76	0.0226829	0.100327	0.226091	0.821131	0.964838
ENSMUSG00000004655	Aqp1	619.856	620.256	809.02	756.895	1293.68	1206.73	1222.94	1238.49	970.982	0.739019	0.107474	6.87625	6.14477e-12	3.05303e-08
ENSMUSG00000004661	Arid3b	27.9796	69.9036	39.8885	84.929	74.5398	66.0487	52.3181	43.9399	57.4434	0.0437778	0.17869	0.244993	0.806462	0.961365
ENSMUSG00000004665	Cnn2	1390.37	1428.03	1502.47	1951.5	1409.63	1253.14	1342.83	1409.14	1460.89	-0.188928	0.112586	-1.67808	0.0933319	0.522832
ENSMUSG00000004667	Polr2e	988.971	746.748	819.248	724.23	717.238	700.651	779.321	663.186	767.449	-0.174117	0.114536	-1.52019	0.128464	0.577843
ENSMUSG00000004677	Myo9b	582.191	525.941	411.158	760.628	854.723	615.859	492.662	537.497	597.582	0.100639	0.154616	0.650896	0.515114	0.872742
ENSMUSG00000004698	Hdac9	415.389	314.011	332.404	365.848	477.883	425.746	366.227	457.792	394.413	0.23647	0.125429	1.88529	0.0593908	0.444068
ENSMUSG00000004707	Ly9	609.094	353.956	518.55	421.845	610.398	487.332	326.988	414.874	467.88	-0.0354104	0.155659	-0.227487	0.820045	0.964425
ENSMUSG00000004709	Cd244	89.3195	32.1779	81.8225	246.387	33.957	49.9828	56.6779	6.13115	74.557	-0.254017	0.133257	-1.90622	0.0566216	0.434193
ENSMUSG00000004730	Adgre1	9213.9	9480.26	9488.34	6714.06	9185.78	10915	8559.46	10359.6	9239.55	0.142141	0.115493	1.23074	0.218421	0.687143
ENSMUSG00000004748	Mtfp1	10.7614	12.2054	3.06834	8.39957	5.79754	7.14039	13.0795	9.19672	8.70611	0.00544701	0.146551	0.0371681	0.970351	NA
ENSMUSG00000004768	Rab23	23.675	28.8491	19.4328	46.6643	17.3926	45.52	41.4185	30.6557	31.701	0.0721978	0.17551	0.411359	0.680809	0.927576
ENSMUSG00000004771	Rab11a	2654.83	2413.34	3088.8	2160.56	2408.46	2608.92	3078.05	2433.04	2605.75	0.0255875	0.115795	0.220972	0.825114	0.965872
ENSMUSG00000004788	Eif2b2	210.923	249.656	199.442	233.321	307.269	203.501	203.823	245.246	231.648	0.0840837	0.14457	0.581611	0.560829	0.891868
ENSMUSG00000004789	Dlst	860.911	797.789	927.662	1060.21	1118.1	835.426	901.397	1087.26	948.594	0.0976138	0.119876	0.814293	0.415477	0.829702
ENSMUSG00000004798	Ulk2	489.643	335.094	424.454	656.1	623.649	524.819	500.292	784.787	542.355	0.264954	0.15421	1.71814	0.0857718	0.502504
ENSMUSG00000004814	Ccl24	1122.41	1806.4	1869.64	718.63	1742.57	1647.65	2984.31	1831.17	1715.35	0.280509	0.178715	1.56959	0.116511	0.562024
ENSMUSG00000004815	Dgkq	88.2433	59.9174	36.8201	60.6636	67.914	58.0157	45.7783	57.224	59.3221	-0.0549398	0.177114	-0.310194	0.756413	0.948123
ENSMUSG00000004837	Grap	259.349	327.326	264.9	241.721	260.061	330.243	378.216	397.503	307.415	0.258588	0.140907	1.83517	0.0664808	0.456544
ENSMUSG00000004843	Chmp2b	759.754	959.788	1151.65	900.621	868.802	969.309	1122.66	960.546	961.641	0.0477418	0.123135	0.387718	0.698225	0.93348
ENSMUSG00000004846	Plod3	445.521	381.696	446.955	498.374	449.723	418.606	401.105	375.022	427.125	-0.0949536	0.117078	-0.811029	0.417349	0.830935
ENSMUSG00000004849	Ap1s1	588.648	464.915	647.42	494.641	467.944	418.606	510.101	417.94	501.277	-0.236359	0.124766	-1.89442	0.0581693	0.439232
ENSMUSG00000004865	Srpk1	253.969	297.368	246.49	212.789	194.632	224.03	212.542	240.137	235.244	-0.176699	0.134679	-1.312	0.18952	0.647749
ENSMUSG00000004880	Lbr	942.697	1078.51	1037.1	1369.13	1052.67	1469.14	1305.77	1297.76	1194.1	0.180857	0.124239	1.45571	0.145472	0.599429
ENSMUSG00000004891	Nes	69.949	38.8353	41.934	30.7984	14.0797	22.3137	34.8787	37.8087	36.3247	-0.313762	0.176745	-1.77523	0.0758606	0.480309
ENSMUSG00000004895	Prcc	47.3501	47.712	47.0479	51.3307	69.5704	48.1977	21.7992	30.6557	45.458	-0.0836329	0.178601	-0.468267	0.639594	0.915145
ENSMUSG00000004896	Rrnad1	76.4058	47.712	39.8885	98.9283	51.3496	72.2965	45.7783	68.4645	62.6029	-0.0778925	0.178399	-0.436619	0.662387	0.922453
ENSMUSG00000004897	Hdgf	795.266	1352.58	1437.01	1472.72	1340.89	1288.84	1242.55	947.262	1234.64	-0.0550673	0.145119	-0.379462	0.704345	0.935032
ENSMUSG00000004929	Thop1	119.451	62.1365	142.167	140.926	143.282	108.891	95.9165	170.65	122.928	0.0964729	0.17404	0.554313	0.579365	0.897588
ENSMUSG00000004931	Apba3	173.258	178.643	230.126	237.055	203.742	225.815	192.923	126.71	196.034	-0.0951176	0.156435	-0.608032	0.543166	0.887064
ENSMUSG00000004933	Matk	679.043	792.241	706.742	471.309	610.398	395.399	428.354	530.344	576.729	-0.339628	0.145653	-2.33176	0.0197134	0.283206
ENSMUSG00000004934	Pias4	305.623	274.067	262.855	238.921	268.343	253.484	215.812	237.071	257.022	-0.124252	0.128602	-0.966178	0.333955	0.780329
ENSMUSG00000004936	Map2k1	1200.97	1262.7	1266.2	1300.07	1248.96	1113.01	1281.79	1381.55	1256.91	-0.00182711	0.0941607	-0.0194042	0.984519	0.997695
ENSMUSG00000004937	Sgta	837.236	756.734	713.901	707.43	663.404	640.85	735.723	739.825	724.388	-0.107021	0.103137	-1.03766	0.299427	0.759635
ENSMUSG00000004945	Tmem242	116.223	170.876	119.665	90.5287	118.435	127.635	117.716	109.339	121.302	-0.048501	0.161778	-0.2998	0.76433	0.950311
ENSMUSG00000004947	Dtx2	140.974	89.8761	139.098	171.725	171.441	145.486	102.456	137.951	137.376	0.0288214	0.16566	0.173979	0.861882	0.975149
ENSMUSG00000004951	Hspb1	7.53297	34.397	31.7062	27.0653	8.2822	15.1733	22.8892	24.5246	21.4463	-0.155539	0.164174	-0.947402	0.343434	NA
ENSMUSG00000004952	Rasa4	1101.97	1085.17	834.589	834.357	1030.31	910.4	694.305	1104.63	949.465	-0.0358917	0.134429	-0.266995	0.789473	0.95834
ENSMUSG00000004980	Hnrnpa2b1	6351.37	6313.52	6236.92	6104.62	5725.48	6123.78	7230.8	5963.56	6256.26	0.00184162	0.089584	0.0205575	0.983599	0.997563
ENSMUSG00000004994	Ccdc130	119.451	126.492	120.688	123.194	112.638	107.106	99.1864	92.989	112.718	-0.193023	0.147918	-1.30493	0.191917	0.651502
ENSMUSG00000004996	Mri1	207.695	236.341	191.26	237.988	167.3	162.444	196.193	159.41	194.829	-0.289618	0.13612	-2.12767	0.0333645	0.355352
ENSMUSG00000005034	Prkacb	1305.36	1226.09	1446.21	1441.93	1309.42	1569.1	1351.55	1537.9	1398.44	0.0817832	0.10016	0.816524	0.4142	0.828484
ENSMUSG00000005043	Sgsh	99.0047	103.191	91.0275	134.393	110.153	92.8251	73.0273	113.426	102.131	-0.0940199	0.163901	-0.573636	0.566214	0.893799
ENSMUSG00000005054	Cstb	4940.55	5078.55	5770.53	3390.63	3626.77	3877.23	5061.77	3475.34	4402.67	-0.213006	0.135537	-1.57157	0.11605	0.56089
ENSMUSG00000005057	Sh2b2	410.009	376.148	439.796	601.036	499.416	421.283	326.988	364.803	429.935	-0.142074	0.145365	-0.977364	0.328389	0.77735
ENSMUSG00000005069	Pex5	513.318	639.119	604.464	700.897	654.293	611.396	481.762	690.776	612.003	-0.00956948	0.12685	-0.0754393	0.939865	0.987748
ENSMUSG00000005078	Jkamp	383.105	246.327	312.971	306.118	294.846	323.995	328.078	286.12	310.195	-0.0153855	0.133663	-0.115106	0.908361	0.98204
ENSMUSG00000005087	Cd44	5501.22	6003.94	6884.34	7389.75	7205.51	5689.11	5330.99	5870.57	6234.43	-0.0863495	0.113199	-0.762812	0.445576	0.844122
ENSMUSG00000005102	Eif2ak4	124.832	84.3282	92.0503	177.324	110.153	102.643	86.1068	107.295	110.592	-0.155048	0.170378	-0.910022	0.362811	0.79416
ENSMUSG00000005103	Wdr1	6180.26	5934.04	7051.05	6940.84	6915.63	7415.3	6450.38	6885.28	6721.6	0.0782366	0.0885282	0.883748	0.376832	0.805182
ENSMUSG00000005107	Slc2a9	63.4922	43.2737	32.729	41.0646	38.9263	48.1977	54.498	81.7486	50.4912	0.159376	0.178529	0.892718	0.372008	0.802492
ENSMUSG00000005125	Ndrg1	704.871	795.57	798.792	1110.61	745.398	567.661	465.413	428.158	702.059	-0.488052	0.148416	-3.28842	0.00100752	0.0615201
ENSMUSG00000005131	4930550C14Rik	16.1421	1.10958	4.09112	7.46628	5.79754	4.46275	2.17992	2.04372	5.41162	-0.119749	0.118439	-1.01106	0.311987	NA
ENSMUSG00000005142	Man2b1	6498.8	7904.66	6688.99	7087.37	8032.9	7957.97	7854.25	9114.97	7642.49	0.210248	0.0911838	2.30576	0.021124	0.291224
ENSMUSG00000005150	Wdr83	134.517	89.8761	128.87	122.26	114.294	133.882	149.325	149.191	127.777	0.147903	0.154863	0.955056	0.33955	0.782229
ENSMUSG00000005161	Prdx2	1588.38	1337.05	1699.86	1441.93	1271.32	1322.76	1383.16	1137.33	1397.72	-0.223717	0.103602	-2.15939	0.03082	0.340237
ENSMUSG00000005198	Polr2a	320.689	335.094	194.328	295.852	307.269	317.748	260.5	310.645	292.766	0.0501602	0.145237	0.345368	0.729818	0.942511
ENSMUSG00000005204	Senp3	203.39	351.737	173.873	201.59	210.368	180.295	200.553	234.005	219.476	-0.123623	0.160816	-0.768726	0.442056	0.843202
ENSMUSG00000005225	Plekha8	50.5785	14.4246	51.139	61.5968	50.5214	83.0071	78.4771	42.918	54.0828	0.226172	0.177443	1.27461	0.202446	0.666128
ENSMUSG00000005233	Spc25	124.832	183.081	139.098	155.859	120.092	191.898	231.072	217.656	170.448	0.235241	0.162582	1.44691	0.147923	0.603095
ENSMUSG00000005262	Ufd1l	549.907	444.942	513.436	538.506	561.533	584.62	575.499	519.104	535.943	0.117078	0.107686	1.08721	0.276943	0.739678
ENSMUSG00000005267	Zfp287	30.1319	25.5204	22.5012	13.9993	4.1411	13.3882	28.339	31.6776	21.2123	-0.0716831	0.160142	-0.447623	0.654425	NA
ENSMUSG00000005299	Letm1	496.1	531.489	454.115	547.839	521.778	437.349	470.863	480.273	492.476	-0.0779201	0.110122	-0.707581	0.479206	0.857963
ENSMUSG00000005312	Ubqln1	1103.04	1159.51	1299.95	1567.92	1287.88	1237.97	1303.59	1339.66	1287.44	0.00894613	0.111361	0.0803342	0.935971	0.986777
ENSMUSG00000005354	Txn2	1032.02	923.172	1103.58	946.351	973.158	988.945	1082.33	1033.1	1010.33	0.0232864	0.0962474	0.241943	0.808824	0.961365
ENSMUSG00000005362	Crbn	285.177	287.382	332.404	286.519	307.269	383.796	322.628	366.847	321.503	0.183479	0.122315	1.50005	0.133601	0.586911
ENSMUSG00000005370	Msh6	224.913	211.93	195.351	367.714	221.135	260.624	272.49	203.35	244.688	-0.0474618	0.158194	-0.300024	0.764159	0.95025
ENSMUSG00000005371	Fbxo11	473.501	240.779	282.288	261.32	298.987	316.855	243.061	339.257	307.006	-0.0505888	0.158303	-0.31957	0.749294	0.947637
ENSMUSG00000005374	Tbl2	128.06	67.6845	121.711	203.456	164.816	157.981	167.854	169.628	147.649	0.214464	0.172202	1.24543	0.212975	0.68137
ENSMUSG00000005378	Wbscr22	278.72	206.382	262.855	267.853	235.214	240.096	245.241	220.721	244.635	-0.0936442	0.129735	-0.721812	0.47041	0.854433
ENSMUSG00000005397	Nid1	29.0557	55.4791	53.1846	158.659	55.4907	103.536	44.6884	54.1585	69.2814	-0.0781216	0.173974	-0.449043	0.653401	0.919248
ENSMUSG00000005410	Mcm5	481.034	590.297	413.203	612.235	475.398	510.538	441.434	476.186	500.041	-0.118627	0.126998	-0.934088	0.350259	0.789644
ENSMUSG00000005413	Hmox1	5509.83	7095.77	6872.06	5274	7134.28	8422.99	7969.79	6396.83	6834.44	0.241907	0.114754	2.10805	0.035027	0.361357
ENSMUSG00000005417	Mprip	326.07	482.668	338.54	667.299	699.017	502.505	407.645	547.716	496.433	0.177252	0.162094	1.09352	0.274167	0.739678
ENSMUSG00000005442	Cic	186.172	163.108	175.918	136.26	190.491	182.08	126.435	144.082	163.068	-0.0270329	0.15225	-0.177556	0.859071	0.974831
ENSMUSG00000005447	Pafah1b3	126.984	117.616	120.688	111.994	84.4784	78.5443	124.255	75.6175	105.022	-0.285426	0.161298	-1.76955	0.0768015	0.481827
ENSMUSG00000005465	Il27ra	48.4262	17.7533	86.9364	71.863	43.8956	52.6604	53.408	42.918	52.2326	-0.0993637	0.177401	-0.560108	0.575406	0.895794
ENSMUSG00000005469	Prkaca	324.994	284.053	345.7	488.108	360.276	396.292	401.105	341.3	367.728	0.042699	0.141648	0.301445	0.763075	0.950126
ENSMUSG00000005470	Asf1b	305.623	343.97	298.652	383.58	374.355	415.928	417.455	524.213	382.972	0.31837	0.129667	2.45528	0.0140774	0.243283
ENSMUSG00000005481	Ddx39	665.053	733.433	761.972	748.495	671.686	770.27	669.235	687.71	713.482	-0.0508282	0.0997288	-0.509664	0.610287	0.908761
ENSMUSG00000005483	Dnajb1	881.357	940.925	967.551	917.42	874.6	997.87	1006.03	963.612	943.671	0.0472344	0.0926295	0.509928	0.610102	0.908761
ENSMUSG00000005501	Usp40	131.289	143.136	117.62	130.66	117.607	180.295	140.605	190.066	143.91	0.198213	0.155354	1.27588	0.201998	0.665756
ENSMUSG00000005505	Kbtbd4	22.5989	19.9725	55.2302	33.5983	54.6625	43.7349	34.8787	27.5902	36.5333	0.126629	0.177049	0.715224	0.474471	0.856138
ENSMUSG00000005506	Celf1	1036.32	1060.76	844.817	1099.41	919.324	1121.04	936.276	1089.3	1013.41	0.00776591	0.111311	0.0697677	0.944379	0.989069
ENSMUSG00000005510	Ndufs3	645.683	518.174	630.033	480.642	467.944	448.06	603.838	427.137	527.689	-0.189099	0.130938	-1.44418	0.148687	0.603556
ENSMUSG00000005514	Por	1165.46	1317.07	1023.8	1301	935.888	1007.69	707.384	771.503	1028.72	-0.422757	0.122389	-3.45421	0.00055191	0.0415675
ENSMUSG00000005533	Igf1r	77.4819	89.8761	59.3213	84.929	110.153	99.073	64.3076	125.688	88.8538	0.232661	0.170927	1.36117	0.17346	0.632344
ENSMUSG00000005534	Insr	167.878	163.108	127.848	115.727	149.908	153.518	142.785	126.71	143.435	-0.000197658	0.150795	-0.00131077	0.998954	0.999644
ENSMUSG00000005566	Trim28	456.283	398.34	413.203	447.044	507.699	516.786	476.313	548.738	470.551	0.23178	0.106362	2.17915	0.0293206	0.331466
ENSMUSG00000005575	Ube2m	340.06	454.928	430.591	508.641	412.453	483.762	443.614	433.268	438.414	0.0264945	0.1261	0.210108	0.833583	0.967861
ENSMUSG00000005580	Adcy9	80.7104	99.8623	73.6402	72.7963	73.7115	64.2636	67.5775	51.0929	72.9568	-0.232715	0.167473	-1.38957	0.164661	0.624428
ENSMUSG00000005583	Mef2c	3182.14	3497.4	3001.86	2509.6	3375.82	3272.09	3183.77	3585.7	3201.05	0.125783	0.103532	1.21492	0.224398	0.693574
ENSMUSG00000005609	Ctr9	326.07	314.011	266.946	345.316	289.877	387.366	348.787	407.721	335.762	0.162452	0.131551	1.23489	0.21687	0.685882
ENSMUSG00000005610	Eif4g2	7090.67	6585.36	6272.72	8206.38	8443.7	9215.57	7635.17	9118.04	7820.95	0.263853	0.101574	2.59764	0.00938678	0.199735
ENSMUSG00000005611	Mrvi1	66.7206	133.15	148.303	150.259	245.981	232.063	195.103	185.978	169.695	0.535982	0.166266	3.22365	0.00126567	0.067912
ENSMUSG00000005615	Pcyt1a	2539.69	3006.97	2785.03	2403.21	3379.96	3353.31	2589.75	3125.86	2897.97	0.193093	0.106562	1.81203	0.069981	0.467339
ENSMUSG00000005621	Zfp592	372.344	412.764	277.174	384.514	399.202	331.136	298.649	304.514	347.537	-0.0949345	0.136861	-0.693657	0.487898	0.860523
ENSMUSG00000005625	Psmd4	1125.64	1127.33	1239.61	1092.88	1087.45	951.458	1137.92	1103.61	1108.24	-0.0920414	0.0955065	-0.963719	0.335187	0.780329
ENSMUSG00000005656	Snx6	2342.75	2088.23	2545.7	1856.3	2040.73	2263.51	2668.22	2266.48	2258.99	0.0573698	0.112699	0.509055	0.610714	0.908872
ENSMUSG00000005667	Mthfd2	231.37	240.779	241.376	302.385	179.724	200.824	253.961	138.973	223.674	-0.301522	0.152234	-1.98065	0.0476306	0.404809
ENSMUSG00000005674	Tomm40l	50.5785	46.6024	40.9112	43.8644	46.3803	38.3796	39.2386	23.5027	41.1822	-0.163234	0.177867	-0.917729	0.358761	0.794029
ENSMUSG00000005682	Pan2	150.659	100.972	191.26	222.122	183.865	206.179	110.086	184.956	168.762	0.0277238	0.170643	0.162466	0.870939	0.976571
ENSMUSG00000005683	Cs	1491.53	1099.59	1491.21	1580.99	1470.09	1370.06	1370.08	1388.7	1407.78	-0.0149866	0.111154	-0.134828	0.892748	0.981186
ENSMUSG00000005686	Ampd3	230.294	204.163	285.356	250.121	320.521	363.268	310.639	386.262	293.828	0.426113	0.131555	3.23905	0.00119928	0.0658409
ENSMUSG00000005687	Bcas2	996.504	755.625	940.958	709.297	693.22	752.419	797.851	810.333	807.026	-0.136236	0.119315	-1.14182	0.25353	0.719397
ENSMUSG00000005698	Ctcf	357.278	426.079	495.026	439.577	476.226	445.382	447.974	617.202	463.093	0.175463	0.131011	1.3393	0.180473	0.638662
ENSMUSG00000005699	Pard6a	58.1115	44.3832	47.0479	29.8651	45.5521	39.2722	70.8474	44.9617	47.5051	0.0856627	0.178246	0.480586	0.630811	0.912554
ENSMUSG00000005732	Ranbp1	1454.94	1416.94	1712.14	1587.52	1086.62	1334.36	1820.23	1212.95	1453.21	-0.151022	0.130047	-1.16129	0.245524	0.712343
ENSMUSG00000005774	Rfx5	27.9796	103.191	65.458	60.6636	51.3496	106.213	94.8265	122.623	79.0381	0.261245	0.178641	1.4624	0.143633	0.598691
ENSMUSG00000005779	Psmb4	1091.2	906.528	1089.26	933.285	917.667	874.698	924.286	912.519	956.181	-0.135469	0.0985356	-1.37482	0.169188	0.629112
ENSMUSG00000005802	Slc30a4	32.2841	37.7258	119.665	137.193	123.405	132.097	110.086	123.645	102.013	0.26425	0.178115	1.48359	0.137917	0.592936
ENSMUSG00000005803	Sqrdl	512.242	590.297	625.942	399.446	578.925	500.72	559.15	639.683	550.801	0.0830514	0.131878	0.629758	0.528853	0.879202
ENSMUSG00000005804	Bloc1s6	196.933	257.423	209.67	195.057	188.006	180.295	184.203	167.585	197.396	-0.208603	0.135648	-1.53782	0.124092	0.577312
ENSMUSG00000005813	Metap1	211.999	116.506	261.832	221.189	278.282	270.442	220.172	223.787	225.526	0.207696	0.161378	1.28702	0.198087	0.660441
ENSMUSG00000005823	Gpr108	612.323	594.736	483.775	495.575	544.14	539.1	493.752	504.798	533.525	-0.0612786	0.112862	-0.542952	0.587163	0.90152
ENSMUSG00000005824	Tnfsf14	184.02	242.998	150.349	197.857	167.3	147.271	106.816	132.841	166.181	-0.355719	0.156455	-2.27362	0.022989	0.300581
ENSMUSG00000005846	Rsl1d1	872.748	834.405	1004.37	849.29	804.201	982.697	973.334	919.672	905.09	0.0423309	0.104997	0.403162	0.686829	0.929597
ENSMUSG00000005871	Apc	374.496	538.147	362.064	428.378	496.932	416.821	244.151	414.874	409.483	-0.084105	0.155522	-0.540793	0.58865	0.901784
ENSMUSG00000005873	Reep5	1424.81	1388.09	1358.25	1348.6	1449.38	1503.05	1402.78	1302.87	1397.23	0.0340477	0.0858936	0.396394	0.691815	0.931823
ENSMUSG00000005881	Ergic3	1111.65	1288.22	1208.93	1007.02	1059.29	1120.15	1157.54	1149.59	1137.8	-0.0373319	0.0997876	-0.374114	0.70832	0.935234
ENSMUSG00000005882	Uqcc1	231.37	153.122	173.873	145.593	206.227	178.51	182.023	192.109	182.853	0.0859494	0.148217	0.579888	0.56199	0.892279
ENSMUSG00000005886	Ncoa2	308.852	338.422	213.761	277.186	296.503	292.756	180.933	335.169	280.448	-0.0299046	0.15594	-0.19177	0.847922	0.971386
ENSMUSG00000005893	Nr2c2	223.837	142.026	160.577	209.989	139.969	166.014	106.816	147.148	162.047	-0.289441	0.157827	-1.83391	0.0666673	0.456878
ENSMUSG00000005897	Nr2c1	106.538	88.7665	111.483	139.06	164.816	156.196	132.975	132.841	129.084	0.296631	0.154826	1.9159	0.0553777	0.429208
ENSMUSG00000005899	Smpd4	202.314	281.834	157.508	244.521	237.699	264.195	222.352	231.962	230.298	0.0859797	0.149195	0.576289	0.56442	0.893262
ENSMUSG00000005907	Pex1	35.5126	90.9857	75.6858	65.33	93.5888	71.4039	56.6779	84.8142	71.7499	0.113192	0.177089	0.63918	0.522706	0.87709
ENSMUSG00000005936	Kctd20	775.896	907.637	974.71	1275.8	1194.29	961.276	1048.54	1189.44	1040.95	0.133801	0.13006	1.02877	0.303589	0.763345
ENSMUSG00000005949	Ctns	711.327	570.325	611.623	493.708	519.294	625.677	523.181	683.623	592.345	-0.017865	0.127779	-0.139812	0.888808	0.979666
ENSMUSG00000005951	Shpk	40.8933	35.5066	39.8885	37.3314	52.1778	41.9498	65.3976	35.765	43.6137	0.193395	0.177331	1.09059	0.275454	0.739678
ENSMUSG00000005968	Tuft1	136.67	164.218	103.301	89.5954	166.472	161.551	113.356	187	140.27	0.241487	0.165913	1.45551	0.145529	0.599429
ENSMUSG00000005973	Rcn1	18.2943	42.1641	34.7746	56.9304	33.957	44.6275	47.9582	54.1585	41.6081	0.114079	0.178519	0.639033	0.522801	0.877102
ENSMUSG00000005981	Trap1	558.516	410.545	609.577	583.303	611.226	486.439	604.928	546.694	551.404	0.0476843	0.128101	0.37224	0.709715	0.935584
ENSMUSG00000005982	Naa60	592.952	616.927	632.079	659.833	767.76	747.956	673.595	754.131	680.654	0.215943	0.0972165	2.22126	0.0263333	0.317566
ENSMUSG00000005983	1700037C18Rik	13.9898	29.9587	36.8201	33.5983	9.11042	27.669	28.339	25.5464	25.629	-0.123642	0.171522	-0.720852	0.471001	NA
ENSMUSG00000005986	Ankrd13d	49.5024	29.9587	45.0024	53.1973	70.3987	54.4455	41.4185	55.1803	49.888	0.181655	0.177046	1.02603	0.304878	0.763345
ENSMUSG00000006005	Tpr	1947.81	2377.83	1861.46	1767.64	1598.46	1785.99	1749.39	1715.7	1850.54	-0.195585	0.103698	-1.8861	0.059282	0.443652
ENSMUSG00000006010	BC003331	564.973	630.242	600.372	409.712	493.619	595.33	627.817	568.153	561.277	0.0433118	0.130429	0.332072	0.739835	0.945683
ENSMUSG00000006014	Prg4	1598.07	1603.34	193.306	1263.67	1057.64	1630.69	2090.54	117.514	1194.35	0.00973137	0.122312	0.0795618	0.936586	0.986905
ENSMUSG00000006019	Dhx34	318.537	281.834	275.128	318.25	345.368	308.822	284.48	302.47	304.361	0.0498914	0.120611	0.413654	0.679127	0.927372
ENSMUSG00000006021	Kptn	76.4058	94.3144	82.8453	85.8623	73.7115	74.0816	83.9269	72.5519	80.4625	-0.115234	0.159725	-0.721453	0.470631	0.854433
ENSMUSG00000006024	Napa	2206.08	2350.09	2097.72	1818.04	1662.24	1964.5	1995.72	1940.51	2004.36	-0.148977	0.102399	-1.45487	0.145705	0.599429
ENSMUSG00000006050	Sra1	849.073	706.803	671.967	795.159	639.386	620.322	608.198	616.18	688.386	-0.256353	0.104555	-2.45186	0.0142119	0.244332
ENSMUSG00000006057	Atp5g1	1002.96	862.145	979.824	795.159	644.355	737.246	1083.42	632.53	842.205	-0.189316	0.140239	-1.34995	0.177031	0.634397
ENSMUSG00000006058	Snf8	346.516	321.779	323.199	342.516	379.325	333.813	381.486	347.432	347.008	0.0995549	0.112024	0.888696	0.374166	0.804154
ENSMUSG00000006095	Tbcb	812.484	889.884	1054.49	900.621	848.925	765.807	927.556	737.781	867.193	-0.140358	0.111605	-1.25764	0.208524	0.674877
ENSMUSG00000006127	Inpp5k	1367.77	1351.47	1334.73	1091.01	1716.07	1630.69	1385.34	1618.62	1436.96	0.275732	0.104867	2.62934	0.008555	0.190608
ENSMUSG00000006134	Crkl	576.81	413.874	425.477	509.574	485.337	523.034	350.967	527.279	476.544	-0.0235519	0.137651	-0.171099	0.864146	0.975149
ENSMUSG00000006154	Eps8l1	6.45683	27.7395	12.2734	11.1994	38.0981	26.7765	22.8892	25.5464	21.3724	0.3286	0.169226	1.94178	0.0521638	NA
ENSMUSG00000006169	Clint1	1448.48	1281.57	1488.15	1872.17	1660.58	1583.38	1637.12	1664.61	1579.51	0.0924022	0.11022	0.838345	0.401837	0.820387
ENSMUSG00000006191	Cdkal1	188.324	225.245	196.374	192.257	220.306	183.865	190.743	209.481	200.824	0.00468916	0.132102	0.0354966	0.971684	0.995099
ENSMUSG00000006205	Htra1	10.7614	105.41	67.5035	137.193	81.9937	107.106	59.9478	31.6776	75.1991	-0.037227	0.141223	-0.263604	0.792085	0.959246
ENSMUSG00000006215	Zbtb17	216.304	188.629	196.374	280.919	221.963	240.988	202.733	301.448	231.17	0.101595	0.148538	0.683965	0.493997	0.861993
ENSMUSG00000006219	Fblim1	210.923	149.793	209.67	135.326	116.779	151.733	167.854	185.978	166.007	-0.1327	0.15983	-0.830254	0.406395	0.823312
ENSMUSG00000006221	Hspb7	2.15228	1.10958	24.5467	14.9326	11.5951	10.7106	25.0691	3.06557	11.6477	0.0326934	0.125355	0.260807	0.794241	NA
ENSMUSG00000006235	Epor	161.421	194.177	86.9364	80.2626	68.7422	148.163	126.435	94.0109	120.019	-0.140722	0.177861	-0.791193	0.428831	0.838343
ENSMUSG00000006262	Mob1b	361.582	236.341	211.716	243.588	265.03	305.252	214.722	308.601	268.354	0.0424593	0.152238	0.278901	0.780321	0.956936
ENSMUSG00000006273	Atp6v1b2	5218.19	4882.16	6114.18	4452.71	4705.94	4954.54	4759.86	4808.86	4987.06	-0.0952166	0.0993743	-0.958161	0.337981	0.781106
ENSMUSG00000006276	Eps15l1	274.415	288.491	244.445	273.453	304.785	322.21	247.421	282.033	279.657	0.0856098	0.125712	0.680996	0.495874	0.862329
ENSMUSG00000006281	Tep1	775.896	846.61	671.967	916.486	925.949	693.511	658.336	622.311	763.883	-0.123038	0.129987	-0.946541	0.343873	0.78481
ENSMUSG00000006288	Ttc5	355.126	397.23	417.295	365.848	294.846	309.715	412.005	410.787	370.356	-0.0904608	0.131469	-0.688078	0.491404	0.861508
ENSMUSG00000006289	Osgep	560.668	813.323	717.992	692.498	675.827	764.915	680.135	719.388	703.093	0.0253734	0.116541	0.217721	0.827647	0.966771
ENSMUSG00000006299	Aamp	1508.75	1540.1	1701.91	1696.71	1513.99	1454.86	1485.62	1643.15	1568.13	-0.0755659	0.0890518	-0.848561	0.396126	0.817183
ENSMUSG00000006301	Tmbim1	3046.55	3058.01	2928.22	2378.01	2825.06	2820.46	3142.35	2881.64	2885.04	0.0297761	0.0983464	0.302768	0.762067	0.949845
ENSMUSG00000006304	Arpc2	10010.2	9109.66	10002.8	9498.98	8467.72	9133.46	9439.05	9178.33	9355.03	-0.088319	0.0765012	-1.15448	0.248304	0.713608
ENSMUSG00000006307	Kmt2b	121.604	94.3144	51.139	62.5301	57.1472	74.9741	65.3976	67.4426	74.3186	-0.181915	0.176282	-1.03195	0.302094	0.762216
ENSMUSG00000006310	Zbtb32	8.60911	42.1641	42.9568	127.86	44.7239	35.702	35.9687	27.5902	45.6968	-0.18484	0.163391	-1.13128	0.257938	0.725344
ENSMUSG00000006315	Tmem147	436.912	431.627	475.593	361.181	359.447	301.682	438.164	344.366	393.622	-0.203141	0.130376	-1.55812	0.119204	0.567868
ENSMUSG00000006333	Rps9	3296.21	3175.62	3293.35	2778.39	2111.96	2299.21	2851.34	2236.85	2755.37	-0.362073	0.106233	-3.4083	0.000653691	0.0457674
ENSMUSG00000006335	Tfpt	110.842	105.41	126.825	91.462	115.951	95.5028	112.266	89.9235	106.023	-0.0514325	0.156619	-0.328392	0.742615	0.947264
ENSMUSG00000006344	Ggt5	74.2535	157.561	52.1618	79.3293	71.2269	78.5443	62.1277	55.1803	78.7981	-0.236108	0.178232	-1.32472	0.185263	0.641672
ENSMUSG00000006356	Crip2	178.639	259.642	287.401	503.974	300.644	232.063	285.57	196.197	280.516	-0.179399	0.171233	-1.04769	0.294781	0.753404
ENSMUSG00000006360	Crip1	17406.5	19333.3	23216.1	21600.9	16803.7	14601.2	22793.2	11149.5	18363.1	-0.256294	0.142544	-1.798	0.0721772	0.473728
ENSMUSG00000006362	Cbfa2t3	190.476	164.218	133.984	186.657	197.116	205.286	147.145	217.656	180.317	0.143253	0.149727	0.95676	0.338688	0.78143
ENSMUSG00000006369	Fbln1	4.30455	9.98623	22.5012	4.66643	10.7669	3.5702	11.9896	13.2841	10.1336	-0.0134763	0.140782	-0.0957245	0.923739	NA
ENSMUSG00000006373	Pgrmc1	1165.46	1236.07	1392	1069.55	1344.2	1241.54	1265.44	1366.22	1260.06	0.0929232	0.100655	0.923186	0.35591	0.792039
ENSMUSG00000006378	Gcat	38.741	95.424	86.9364	85.8623	83.6502	63.371	67.5775	94.0109	76.9467	0.00404195	0.176319	0.0229241	0.981711	0.997563
ENSMUSG00000006386	Tek	0	0	0	18.6657	10.7669	18.7435	19.6193	0	8.47442	0.0257653	0.0498492	0.516866	0.60525	NA
ENSMUSG00000006390	Elovl1	1549.64	1566.73	1629.29	1358.86	1445.24	1594.99	1627.31	1539.94	1539	0.0224073	0.092078	0.243352	0.807733	0.961365
ENSMUSG00000006392	Med8	333.603	363.943	383.543	320.117	400.858	395.399	408.735	361.738	370.992	0.14343	0.113457	1.26419	0.206164	0.670718
ENSMUSG00000006395	Hyi	125.908	130.931	111.483	90.5287	97.7299	114.246	137.335	97.0765	113.155	-0.028907	0.15937	-0.181383	0.856067	0.974046
ENSMUSG00000006398	Cdc20	194.781	191.958	137.053	208.123	173.926	205.286	236.521	227.874	196.94	0.158226	0.147524	1.07255	0.283475	0.744225
ENSMUSG00000006403	Adamts4	49.5024	64.3557	27.6151	52.264	4.1411	16.0659	32.6988	32.6994	34.9178	-0.380541	0.167639	-2.27	0.0232074	0.302243
ENSMUSG00000006411	Nectin4	32.2841	22.1916	40.9112	41.9978	57.9754	62.4785	19.6193	35.765	39.1529	0.15508	0.176988	0.876217	0.380912	0.807678
ENSMUSG00000006412	Pfdn2	403.552	428.298	432.636	329.45	311.411	319.533	429.444	312.688	370.877	-0.180247	0.13308	-1.35443	0.1756	0.63401
ENSMUSG00000006418	Rnf114	1344.1	1485.73	1171.08	1096.61	1158.68	1035.36	1061.62	1225.21	1197.3	-0.165452	0.110853	-1.49253	0.135562	0.588059
ENSMUSG00000006423	C330007P06Rik	504.709	474.901	500.14	482.509	533.373	639.065	498.112	452.683	510.686	0.100679	0.118027	0.853018	0.393649	0.815497
ENSMUSG00000006435	Neurl1a	29.0557	37.7258	12.2734	19.599	35.6134	34.8094	37.0586	41.8962	31.0039	0.266065	0.177579	1.49829	0.134057	NA
ENSMUSG00000006442	Srm	379.877	356.176	365.133	319.184	356.963	363.268	453.423	320.863	364.361	0.0622132	0.126058	0.493527	0.62164	0.910027
ENSMUSG00000006456	Rbm14	390.638	456.038	463.32	469.443	483.68	432.886	421.815	602.896	465.089	0.106594	0.126736	0.841069	0.40031	0.820027
ENSMUSG00000006457	Actn3	0	5.54791	6.13669	6.533	5.79754	8.92549	3.26988	9.19672	5.6759	0.0772445	0.122439	0.630884	0.528116	NA
ENSMUSG00000006463	Zdhhc24	73.1774	78.7803	131.939	76.5294	87.7913	93.7177	69.7574	67.4426	84.8919	-0.111384	0.171826	-0.648234	0.516833	0.873239
ENSMUSG00000006464	Bbs1	0	0	10.2278	22.3989	17.3926	2.67765	9.80964	10.2186	9.09064	0.028528	0.106815	0.267079	0.789408	NA
ENSMUSG00000006471	Ndor1	165.725	203.053	118.643	194.123	250.122	156.196	198.373	197.219	185.432	0.172111	0.158588	1.08527	0.277802	0.739678
ENSMUSG00000006476	Nsmf	470.272	550.352	467.411	467.576	598.803	538.207	499.202	522.169	514.249	0.128983	0.109804	1.17466	0.24013	0.709083
ENSMUSG00000006494	Pdk1	150.659	160.889	260.809	242.654	200.429	251.699	219.082	254.443	217.583	0.135006	0.155797	0.866551	0.386188	0.811359
ENSMUSG00000006498	Ptbp1	1262.31	1276.02	1417.57	1753.64	1515.64	1133.54	1159.72	1104.63	1327.88	-0.185769	0.124774	-1.48884	0.136528	0.588838
ENSMUSG00000006517	Mvd	164.649	181.971	158.531	125.994	160.675	121.387	122.076	135.907	146.399	-0.169406	0.150922	-1.12247	0.261662	0.727877
ENSMUSG00000006519	Cyba	5231.11	5648.88	5717.35	4442.44	4773.86	4245.86	4994.2	4013.86	4883.44	-0.20195	0.104136	-1.93929	0.0524663	0.422494
ENSMUSG00000006526	Tmem110	119.451	139.807	119.665	142.793	180.552	149.056	177.663	166.563	149.444	0.295443	0.142302	2.07617	0.0378783	0.371326
ENSMUSG00000006527	Sfmbt1	336.831	249.656	270.014	243.588	298.159	287.401	241.971	249.333	272.119	-0.0233033	0.134596	-0.173135	0.862545	0.975149
ENSMUSG00000006585	Cdt1	351.897	304.025	378.429	343.449	340.398	319.533	279.03	312.688	328.681	-0.11951	0.120174	-0.994478	0.31999	0.771608
ENSMUSG00000006589	Aprt	1250.47	1026.36	1291.77	942.618	831.532	807.757	891.587	776.612	977.339	-0.396343	0.113923	-3.47903	0.000503224	0.0400635
ENSMUSG00000006599	Gtf2h1	683.348	853.268	774.245	789.56	712.269	854.17	858.889	1015.73	817.684	0.131191	0.117336	1.11808	0.263534	0.728868
ENSMUSG00000006611	Hfe	1347.33	1386.98	1378.71	1108.74	1362.42	1421.83	1216.4	1453.08	1334.44	0.05764	0.103042	0.559383	0.5759	0.895855
ENSMUSG00000006641	Slc5a6	74.2535	61.027	65.458	75.5961	39.7545	92.8251	77.3872	97.0765	72.9222	0.086041	0.17622	0.488259	0.625366	0.912188
ENSMUSG00000006651	Aplp1	15.0659	24.4108	23.524	26.132	21.5337	20.5286	17.4394	39.8524	23.5609	0.0605903	0.175015	0.3462	0.729192	NA
ENSMUSG00000006673	Qrich1	1100.89	1096.27	1197.68	1237.54	1215.83	1240.64	1113.94	1159.81	1170.32	0.0281465	0.09053	0.310908	0.75587	0.948123
ENSMUSG00000006676	Usp19	574.658	550.352	539.006	819.425	552.422	555.166	546.07	582.459	589.945	-0.12933	0.128372	-1.00746	0.313715	0.770463
ENSMUSG00000006678	Pola1	97.9286	106.52	129.893	189.457	151.564	133.882	114.446	109.339	129.129	-0.0282499	0.166772	-0.169392	0.865488	0.975149
ENSMUSG00000006699	Cdc42	14434.2	12873.4	16530.2	13581.2	13210.1	14466.4	14343.9	14440.9	14235	-0.022563	0.0921573	-0.244831	0.806587	0.961365
ENSMUSG00000006705	Pknox1	277.644	361.723	278.196	422.778	468.772	401.647	404.375	441.443	382.072	0.29355	0.135993	2.15856	0.0308842	0.340239
ENSMUSG00000006715	Gmnn	222.761	190.848	233.194	180.124	195.46	215.997	221.262	188.022	205.958	-0.00888037	0.135034	-0.0657641	0.947566	0.990528
ENSMUSG00000006717	Acot13	277.644	345.08	272.06	180.124	246.809	231.17	264.86	232.984	256.341	-0.106383	0.150017	-0.709141	0.478237	0.857963
ENSMUSG00000006728	Cdk4	1227.87	1206.11	1188.47	1047.15	1088.28	1087.13	1289.42	1126.09	1157.57	-0.0227716	0.0983787	-0.231469	0.81695	0.962879
ENSMUSG00000006731	B4galnt1	1289.21	984.199	1334.73	1566.99	1158.68	933.607	871.968	1115.87	1156.91	-0.289871	0.129418	-2.23981	0.0251033	0.312596
ENSMUSG00000006732	Mettl1	53.8069	37.7258	43.9796	49.4641	48.0367	38.3796	34.8787	39.8524	43.2655	-0.114611	0.17619	-0.650496	0.515372	0.872742
ENSMUSG00000006736	Tspan31	884.586	1015.27	967.551	761.561	875.428	817.575	911.207	900.257	891.679	-0.0450192	0.107286	-0.419617	0.674765	0.926437
ENSMUSG00000006740	Kif5b	1624.97	1824.15	1673.27	1615.52	1674.66	1630.69	1568.45	1598.19	1651.24	-0.054199	0.083699	-0.647546	0.517278	0.87344
ENSMUSG00000006763	Saal1	105.462	108.739	148.303	134.393	116.779	126.742	116.626	110.361	120.926	-0.0608878	0.152396	-0.399538	0.689497	0.931041
ENSMUSG00000006782	Cnp	726.393	906.528	559.461	643.967	570.643	672.09	585.309	627.421	661.476	-0.174781	0.129922	-1.34528	0.178536	0.636337
ENSMUSG00000006784	Ttc25	4.30455	6.65749	1.02278	12.1327	9.11042	11.6031	14.1695	14.306	9.16332	0.197457	0.142953	1.38127	0.167196	NA
ENSMUSG00000006800	Sulf2	1853.11	2130.4	2021.02	2663.6	2833.34	2528.59	2186.46	2433.04	2331.19	0.179195	0.116029	1.5444	0.122492	0.574151
ENSMUSG00000006818	Sod2	1359.16	1638.85	1447.23	1406.46	1375.67	1270.99	1459.46	1415.27	1421.64	-0.0775977	0.0946135	-0.820155	0.412128	0.827957
ENSMUSG00000006850	Tmco6	43.0455	71.0132	46.0251	48.5308	67.914	53.553	80.657	89.9235	62.5828	0.291825	0.174841	1.66908	0.0951007	0.5253
ENSMUSG00000006906	Stambp	221.684	204.163	208.647	218.389	241.012	255.269	264.86	285.098	237.39	0.252601	0.123308	2.04853	0.0405084	0.383559
ENSMUSG00000006920	Ezh1	585.419	454.928	432.636	507.707	557.392	513.216	389.116	562.022	500.305	0.0257699	0.131628	0.195778	0.844784	0.970698
ENSMUSG00000006930	Hap1	2.15228	15.5341	1.02278	0.933285	2.48466	2.67765	1.08996	7.153	4.13097	-0.0460872	0.100415	-0.458969	0.646256	NA
ENSMUSG00000006931	P3h4	3.22841	24.4108	8.18225	27.9986	10.7669	25.8839	11.9896	6.13115	14.8239	-0.0453764	0.144786	-0.313404	0.753974	NA
ENSMUSG00000006932	Ctnnb1	1575.47	1699.88	1646.68	1782.58	1950.46	1922.55	1608.78	2002.84	1773.65	0.146644	0.0957722	1.53118	0.125726	0.577312
ENSMUSG00000006941	Eif1b	601.561	657.982	726.174	556.238	568.159	549.81	713.924	552.825	615.834	-0.0807732	0.120183	-0.672087	0.501528	0.865626
ENSMUSG00000006998	Psmd2	2012.38	1938.44	2374.9	2763.46	2352.14	2279.57	2039.32	2182.69	2242.86	-0.0338049	0.112389	-0.300784	0.763579	0.950133
ENSMUSG00000007029	Vars	478.881	716.789	603.441	1087.28	568.987	712.254	652.886	879.819	712.542	-0.027446	0.159111	-0.172496	0.863048	0.975149
ENSMUSG00000007035	Msh5	8.60911	9.98623	10.2278	19.599	18.2208	24.0988	6.53976	19.4153	14.5871	0.138851	0.160689	0.864097	0.387535	NA
ENSMUSG00000007036	Abhd16a	410.009	501.531	377.406	427.445	517.637	475.729	464.323	543.628	464.713	0.195256	0.117014	1.66866	0.0951846	0.525472
ENSMUSG00000007038	Neu1	1613.13	1627.76	1354.16	1217	1578.59	1577.13	1418.04	1607.38	1499.15	0.0805396	0.107728	0.74762	0.454689	0.848064
ENSMUSG00000007039	Ddah2	157.116	170.876	152.394	118.527	134.172	157.981	156.954	170.65	152.334	0.0391195	0.147543	0.26514	0.790902	0.958689
ENSMUSG00000007041	Clic1	5042.78	4422.79	5041.29	4937.08	4919.62	3972.74	4420.88	4625.95	4672.89	-0.108051	0.0913898	-1.18231	0.237082	0.705967
ENSMUSG00000007050	Lsm2	144.203	133.15	135.007	169.858	115.123	143.7	179.843	109.339	141.278	-0.067324	0.157464	-0.427551	0.668978	0.92492
ENSMUSG00000007080	Pole	101.157	8.87665	57.2757	175.458	109.325	68.7263	74.1173	85.836	85.0965	-0.00394944	0.139341	-0.0283436	0.977388	0.996482
ENSMUSG00000007216	Zfp775	25.8273	53.2599	31.7062	32.665	68.7422	32.1318	33.7888	37.8087	39.4912	0.126706	0.178247	0.710842	0.477182	0.857112
ENSMUSG00000007338	Mrpl49	145.279	127.602	182.055	145.593	160.675	190.113	175.484	204.372	166.396	0.222648	0.145048	1.53499	0.124786	0.577312
ENSMUSG00000007379	Dennd2c	118.375	109.849	143.189	122.26	139.969	120.494	183.113	154.301	136.444	0.206164	0.153193	1.34578	0.178374	0.636337
ENSMUSG00000007411	Mark3	573.582	667.968	700.605	839.957	865.489	885.409	766.242	862.448	770.212	0.245764	0.117331	2.09461	0.0362053	0.365838
ENSMUSG00000007415	Gatad1	139.898	104.301	125.802	97.0617	106.012	131.205	127.525	134.885	120.836	0.0725242	0.154813	0.468463	0.639453	0.915145
ENSMUSG00000007458	M6pr	3057.31	2863.83	3042.77	3120.91	3246.62	3303.33	2688.93	3061.49	3048.15	0.0240527	0.0897283	0.268062	0.788652	0.958075
ENSMUSG00000007476	Lrrc8a	29.0557	49.9312	27.6151	16.7991	14.908	20.5286	35.9687	21.459	27.0332	-0.156321	0.173458	-0.901204	0.36748	NA
ENSMUSG00000007564	Ppp2r1a	1750.88	1633.3	2217.39	2131.62	1824.57	1871.68	1826.77	1829.13	1885.67	-0.0661571	0.105848	-0.625019	0.531959	0.881306
ENSMUSG00000007570	Fance	156.04	190.848	137.053	153.992	176.411	183.865	153.684	200.284	169.022	0.131476	0.143886	0.913749	0.360849	0.794029
ENSMUSG00000007589	Tinf2	258.273	219.697	244.445	249.187	260.889	234.74	220.172	201.306	236.089	-0.0688523	0.129346	-0.532312	0.59451	0.903258
ENSMUSG00000007603	Dus3l	257.197	198.615	219.898	201.59	207.055	163.337	188.563	197.219	204.184	-0.175484	0.137031	-1.28061	0.200329	0.663527
ENSMUSG00000007610	Gtpbp3	22.5989	12.2054	18.4101	14.9326	22.3619	35.702	9.80964	24.5246	20.0681	0.152232	0.169558	0.89782	0.369282	NA
ENSMUSG00000007613	Tgfbr1	1080.44	1317.07	1155.74	1289.8	1279.6	1366.49	1062.71	1505.2	1257.13	0.0943537	0.114216	0.826098	0.408748	0.825338
ENSMUSG00000007617	Homer1	128.06	63.2461	135.007	148.392	106.012	127.635	87.1968	145.104	117.582	-0.0179835	0.173114	-0.103883	0.917263	0.983522
ENSMUSG00000007646	Rad51c	20.4466	23.3012	12.2734	33.5983	17.3926	15.1733	32.6988	3.06557	19.7437	-0.10386	0.157174	-0.660799	0.508741	NA
ENSMUSG00000007655	Cav1	194.781	361.723	462.297	459.176	324.662	210.642	210.362	183.934	300.947	-0.439228	0.169594	-2.58988	0.00960096	0.200874
ENSMUSG00000007656	Arpp19	748.992	785.583	790.61	738.229	735.459	746.171	852.349	737.781	766.897	0.00299733	0.096359	0.0311059	0.975185	0.995693
ENSMUSG00000007659	Bcl2l1	745.764	768.94	625.942	541.306	607.085	674.767	636.537	617.202	652.193	-0.0697634	0.118862	-0.586927	0.557253	0.890599
[truncated: 11,248 more rows]

## Sheet: MAC3_PAD4flCreLysMVsC57Bl6
Row.names	Gene_Symbol	B6_MAC3_1	B6_MAC3_2	B6_MAC3_3	B6_MAC3_4	Pad4flfl_LyzMCre_MAC3_1	Pad4flfl_LyzMCre_MAC3_2	Pad4flfl_LyzMCre_MAC3_3	Pad4flfl_LyzMCre_MAC3_4	baseMean	log2FoldChange	lfcSE	stat	pvalue	padj
[truncated: 12,038 more rows]

[truncated: 5 more sheets: MAC4_PAD4flCreLysMVsC57Bl6, MAC1_PAD4koVsC57Bl6, MAC2_PAD4koVsC57Bl6, MAC3_PAD4koVsC57Bl6, MAC4_PAD4koVsC57Bl6]
