# Supplementary material for: PAD4 deletion in synovial macrophages exacerbates pathology in inflammatory arthritis
Source: Research Square preprint supplement (doi:10.21203/rs.3.rs-9653857/v1), 2026-06-11
Supplement: Supplementary file 3 [file 6b3332b744fe13114c941d3a.xlsx]

## Sheet: Morpheus_4_kmeans
LogFC>1	25
id	k_means_4	B6_MA_1	B6_MA_2	B6_MA_3	B6_MA_4	B6_MB_1	B6_MB_2	B6_MB_3	B6_MB_4	B6_MC_1	B6_MC_2	B6_MC_3	B6_MC_4	B6_MD_1	B6_MD_2	B6_MD_3	B6_MD_4
1810034E14Rik	1	3.61	5.19	4.88	4.86	3.22	3.33	2.96	2.07	7.18	7.49	7.26	6.65	2.73	2.69	3.97	1.96
2410004P03Rik	1	1.51	1.82	1.77	1.47	0.72	0	1.11	0.62	3.74	3.53	3.51	2.98	0.58	0.69	0.61	0.54
A4galt	1	2.62	2.58	2.89	3.92	1.8	4.2	2.02	2.74	11.52	11.29	10.16	10.35	5.73	9.7	4.1	2.13
Adamts14	1	0.38	0.47	0.59	0.43	0.25	0.25	0	0.06	0.8	2.26	1.86	1.5	0	0.05	0.21	0.07
Adgrg1	1	1.43	1.26	1.79	2.01	0.62	0.72	0.49	1.34	3.18	4.62	3.83	3.95	1.66	1.33	0.9	0.91
Akr1b8	1	17.7	14.11	25.1	21.44	11.44	6.9	13.91	10.01	49	42.21	42.75	53.21	14.55	11.26	14.38	6.46
Aqp1	1	142.98	162.99	199.27	191.98	28.69	27.93	35.69	34.99	200.98	333.18	466.03	379.03	44.77	40.86	46.41	21.71
Arl4d	1	5.62	4.78	7.01	6.3	7.57	5.51	4.63	2.71	18.8	17.79	14.78	14.52	3.99	9.24	3.83	2.75
Asns	1	0.69	0.49	0.48	0.87	0.72	0	0.21	0.15	1.62	1.3	1.54	2.33	0.38	0.34	0.29	0.23
B3gnt9	1	0.6	1.12	1.14	1.54	0.72	0.53	0.54	0.35	2.87	2.56	3.06	3.22	0.93	0.76	1.07	0.34
Bambi-ps1	1	8.4	5.87	7.32	7.04	2.65	2.88	3.8	3.83	11.17	7.37	8.81	9.45	10.2	8.59	7.97	1.75
Bcl6b	1	1.05	1.47	1.09	1.14	0.39	0.27	0.4	0.9	2.46	4.21	3.23	2.6	0.6	1.36	1.49	0.52
C2	1	0.86	0.97	1.26	1.28	0.36	0.4	0.32	0.32	3.1	2.76	2.44	2.57	0.64	0.73	0.36	0.19
C3	1	1.02	0.63	1.21	2.3	2.41	4.77	2.92	6.27	0.24	1.07	0.93	11.23	2.64	1.92	1.03	1.69
C4b	1	35.34	28.88	39.78	45.89	10.46	22.31	14.55	22.3	58.36	69.15	79.18	60.16	42.48	47.47	26.65	13.8
C77080	1	1.21	1.09	1.23	1.74	0.43	0.33	0.5	0.55	1.62	2.38	2.14	2.12	0.84	0.27	0.51	0.26
Camp	1	0.16	0.61	0	9.54	11.39	0.35	0	2.69	2.71	13.26	5.71	1555.49	12.72	14.46	0.19	1.06
Cdk15	1	1.27	0.93	1.52	1.85	1.08	0.61	0.84	0.65	5.09	3.85	3.5	4.21	1.08	0.28	1.21	0.23
Cdr2	1	4.36	4.52	4.62	3.87	2.05	2.87	2.99	2.28	8.98	7.54	7.71	6.64	2.72	5.87	3.5	1.89
Chil3	1	1.7	0.73	1.04	9.69	10.16	4.3	6.12	10.27	1.37	2.57	2.84	374.82	5.16	3.32	3.1	2.27
Cma1	1	1.36	4.31	0.32	2.05	0.73	3.06	7.5	5.17	7	7.11	0.83	7.92	15.29	1.37	0.93	3
Coro2b	1	0.74	0.71	0.55	0.92	0.42	0.38	0.33	0.23	2.07	3.09	2.27	2.69	0.88	1.48	0.89	0.65
Cpa3	1	0.39	2.32	0.06	1.33	0.14	0.57	3.08	3.38	4.69	5.05	1.02	5.07	8.78	0.12	0.85	3.8
Crip2	1	11.25	11.82	12.11	9.83	4.8	6.79	7.36	13.52	18.61	21.78	20.48	16.41	4.21	5.72	12.63	16.41
Ctgf	1	6.31	5.02	9.17	5.76	2.2	3.54	1.2	2.9	15.66	20.01	18.38	13.57	0.38	2.94	2.05	1.63
Ctsk	1	46.85	38.98	61.29	49.04	11.94	29.87	40.84	18.59	133.33	123.13	169.21	143.61	55.71	50.89	57.95	24.1
Cxcr3	1	4.76	3.68	5.4	6.23	9.98	10.39	7.53	6.88	20.67	14.62	15.84	17.56	12.73	13.71	8.26	4.05
Cxx1b	1	6.01	6.3	6.85	7.16	3.72	3.73	3.37	2.12	4.63	6.98	8.47	11.05	3.53	3.85	2.55	3.36
Cyr61	1	16.46	14.62	19.53	25.37	3.37	3.12	2.76	4.1	46.12	23.34	43.48	41.73	4.93	6.55	6.44	4.38
Ednrb	1	34.87	33.61	54.2	46.95	36.71	37.73	39.78	34.81	163.62	157.65	151.75	146.24	96.98	94.14	67.89	31.36
Egfr	1	1.49	1.74	2.24	2.39	1.26	2.51	1.28	1.83	4.01	4.96	4.94	4.56	2.73	4.23	2.46	1.23
Enho	1	3.92	3.38	4.76	3.77	2.06	0.93	1.03	1.43	4.31	3.72	5.34	6.32	1.84	2.49	0.56	0.63
Enpep	1	3.56	4.26	4.81	4.19	2.24	3.35	2.48	1.72	22.86	21.07	19.1	13.1	5.53	7.32	3.72	1.03
F13a1	1	612.21	599.13	660.49	671.59	324.84	360.31	373.81	368.72	1151.79	1259.27	1358	1184.48	730.45	752.43	526.71	258.28
F830016B08Rik	1	1.32	0.63	1	1.67	0.4	0.68	0.72	0.38	2.49	2.2	1.01	1.88	0.64	0.48	0.22	0.24
Fam101b	1	0.35	0.2	0.16	0.31	0.67	1.68	0.81	0.29	0.23	0.48	0.6	6.85	0.84	0.48	0.41	0.46
Fam109a	1	4.36	4.27	3.69	4.09	1.23	2.11	2.44	3.44	5.1	6.6	6.15	4.99	3.27	3.94	4.15	3.45
Fcgrt	1	177.42	181.38	194.4	177.98	115.1	130.45	128.1	93.88	294.38	263.48	248.75	252.3	203.3	206.84	146.63	81.6
Fgfr1	1	3.56	4.11	3.64	4.59	1.32	1.88	1.64	2.08	3.7	6.13	6.27	6.16	4.16	4.59	4.05	4.48
Fosl1	1	3.55	4.75	5.88	5.82	12.42	12.38	11.87	12.42	11.35	15.61	15.22	21.37	9.81	11.19	14.49	11.45
Fxyd2	1	17.38	16.5	16.2	14.53	14.28	20.22	15.83	9.47	53.91	52.44	46.78	53.16	29.42	37.12	22.47	8.48
Gatm	1	55.23	65	72.01	54.35	37.63	47.31	44.93	28.95	113.19	118.15	112.04	98.55	40.73	40.63	39.21	17.73
Gca	1	0.46	0.53	0.37	0.43	0.46	1.77	1.21	1.34	1.04	0.62	0.6	9.43	1.37	0.49	0.69	0.5
Gdpd1	1	14.23	12.99	14.44	16.32	10.75	13.49	11.87	9.17	18	18.36	19.86	19	14.56	10.01	6.55	3.4
Gimap6	1	3.41	4.29	4.88	4.65	1.99	2.75	3.31	2.76	13.05	10.88	11.14	7.88	7.23	7.93	3.81	1.19
Gja1	1	6.02	6.97	11.34	14.64	4.51	0.42	5.38	7.92	35.86	25.59	32.64	32.69	7	5.13	4.7	4.07
Gm15912	1	1.26	2.4	3.55	2.12	3.85	2.73	1.64	2.55	8.68	9.43	12.29	13.46	6.97	4.11	5.93	1.59
Gm4951	1	3.53	2.28	3.79	2.87	3.46	2.93	2.33	1.41	9.69	8.2	5.37	7.31	5.05	5.3	2.43	1.04
Gpr146	1	6.25	6.46	5.88	6.48	3.04	4.07	3.81	3.34	9.05	8.51	7.82	7.77	7.56	6.97	4.89	2.93
Gsr	1	15.38	19.24	18.57	21.51	10.89	9.38	9.2	14.86	15.61	16.49	18.53	54.06	13.12	9.58	14.53	11.9
Hdc	1	0.14	0.18	0.03	0.18	0.14	0.03	0.07	0.61	0.39	0.25	0.08	4.93	0.18	0.07	0.03	0.11
Hmgb2	1	16.41	17.26	16.35	17.31	34.18	35.04	32.47	45.19	22.41	20.19	19.13	66.63	27.82	22.8	31	37.11
Hp	1	0.21	0.36	0.63	6.6	2.58	1.09	0.74	4.54	0.71	0.25	1	60.39	0.81	3.01	1.48	0.44
Ifi27l2a	1	442.96	437.12	476.83	451.85	496.23	353.56	414.23	289.36	725.86	691.71	579.89	876.52	517.62	372.17	345.74	150.47
Ifitm6	1	0.68	0.54	1.43	3.13	1.4	3.29	4.29	4.79	2.7	4.84	3.14	33.08	9.15	15.42	10.68	13.34
Itga9	1	4.54	6.64	6.67	9.24	4.13	5.68	4.08	5.77	9.66	10.28	10.55	9.96	5.43	4.7	3.61	1.79
Kcnk5	1	0.36	0.65	0.75	0.8	0.12	0.31	0.14	0.4	1.86	1.22	2.31	1.08	0.82	1.68	0.38	0.31
Lbx1	1	0.24	0.14	0.46	0.35	0.42	0.05	0.24	0.37	1.19	2.24	1.79	3.43	0.51	0.64	0.23	0.42
Lcn2	1	0	0.13	0.04	0.84	1.13	0	0.3	0.61	0.25	1.27	1.44	154.48	1.14	1.51	0.05	0.31
Lrg1	1	1.71	1.29	2.36	9.34	1.26	2.33	3.42	5.03	5.65	3.23	6.9	59.03	5.33	2.59	3.07	4.68
Ltf	1	0	0.38	0.04	2.1	2.21	0.08	0.01	0.69	0.75	2.92	1.9	321.07	2.33	1.52	0	0.48
Mcpt4	1	0.49	1.4	0.12	2.1	0	0	2.04	2.86	5.3	4.89	0.67	3.93	5.46	0.34	0.72	4.64
Ms4a4a	1	107.79	109	239.41	271.65	283.28	232.87	358.01	313.05	471.66	339.91	522.7	705.18	348.01	209.09	267.56	154.7
Mturn	1	3.48	3.59	3.45	3.84	0.53	1.16	1.08	1.84	5.81	6.52	7.23	5.47	1.13	2.26	1.37	1.91
Ngp	1	0.1	5.02	0	32.6	12.42	0.11	0	7.23	11.1	26.66	26.43	4157.52	43.7	19.33	0.12	6.12
NoGeneName	1	1.37	1.31	1.75	1.29	1.27	0.53	0.67	0.64	2.4	3.82	1.97	2.85	0.43	1.55	0.35	0
Npl	1	53.81	51.67	63.6	58.99	40.35	32.42	36.48	24.8	76.85	61.18	66.71	81.59	58.42	42.28	35.77	13.57
Nxpe5	1	1.4	1.4	1.95	2.48	3.31	2.89	2.94	2.9	5.1	3.27	5.22	5.03	3.8	4.18	2.63	2.26
Pkp4	1	1.27	1.48	1.52	1.61	0.58	0.67	0.79	0.53	2.9	2.29	2.19	2.33	1.33	1.75	1.12	0.4
Plac8	1	0.35	0.15	0.63	4.1	5.1	2.26	2.54	7.99	0	0.16	0.22	6.4	1.41	1.06	0.97	0.93
Plekhf1	1	1.15	1.52	1.45	2.03	1.22	1.42	0.99	1.14	2.81	3.38	3.77	3.97	2.13	1.5	1.63	0.85
Plet1	1	0.75	0.95	0.66	0.45	1.35	0.87	1.03	0.84	3.66	3.44	4.53	4.26	0.92	0.79	2.12	1.85
Ppic	1	6.41	5.76	8.15	12.39	3.05	6.74	7.28	8.55	13.56	16.86	12.86	16.83	9.97	10.98	6.34	7.15
Prkar2b	1	11.63	11.21	12.34	11.88	5.77	4.52	5.72	6.58	23.33	23.31	20.64	17.37	10.83	9.96	7.93	7.97
Ptk2	1	5.42	6.56	5.75	6.35	2.19	2.47	3.4	3.72	6.7	9.06	8.76	8.24	5.34	4.41	4.85	4.71
Ptrf	1	15.32	20.48	19.53	17.58	6.53	7.4	7.23	8.33	20.33	24.79	27.85	22.71	14.02	14.87	21.84	14.88
Rdh12	1	1.52	1.44	1.43	1.26	0	1.81	0.52	0.29	3.69	4.23	1.86	3.99	1.39	1.21	0.69	0.49
Rnasel	1	4.65	4.47	5.85	5.25	4.62	4.27	3.74	3.53	15.27	7.08	7.33	7.35	7	8.69	4.27	2.46
S100a8	1	4.19	2.35	2.2	19.06	18.35	0.67	1.93	3.8	6.37	12.31	17.82	2565	13.89	14.7	2.32	5.61
S100a9	1	0.94	2.92	0.44	16.29	15.61	0.38	0.34	4.29	6.96	16.92	19.7	2642.28	19.73	21.37	0.97	5.8
Selenbp1	1	16.26	19.4	16.54	19.3	11.58	15.64	12.15	7.85	38.74	33.86	29.44	27.77	24.11	33.49	14.96	5.28
Serpinb1a	1	27.68	26.33	23.51	20.4	14.62	11.33	12.54	9.9	30.64	25.57	24.14	59.55	29.3	27.3	18.94	16.77
Slc10a6	1	3.31	2.56	3.22	3.69	1.54	1.98	1.45	1.39	7.4	6.73	5.23	7.9	1.85	0.74	1.08	0.81
Slc35g1	1	3.46	5.2	5.22	5.51	3.51	2.27	3.89	3.13	10.34	7.26	9.21	9.32	6.07	3.74	3.62	1.76
Slc40a1	1	7.69	7.83	10.12	9.25	8.19	5.15	3.64	4.4	13.63	16.41	13.74	14.32	6.77	4.57	3.16	1.35
Slfn4	1	0.2	0.06	0.28	0.31	0.61	0.73	1.22	0.51	0.06	0.19	0.43	6.97	0.29	0	0.47	0.15
Sorl1	1	0.03	0.21	0.07	0.67	1.26	1.03	0.9	3.18	0	0.11	0.09	3.1	0.21	0.46	0.47	1.52
Stac2	1	2.96	2.73	3.58	3.81	1.38	0.98	1.61	0.91	5.54	7.91	7.74	6.45	3.47	3.67	3.69	3.58
Steap4	1	1.65	2.75	3	4.78	2.24	4.99	2.86	4.6	7.04	10.87	8.27	8.32	6.08	5.52	3.99	4.41
Stk19-ps1	1	6.1	7.39	9.7	6.87	4.81	8.13	6.88	4.82	15.21	13.12	12.88	13.17	12.09	8.31	6.36	5.34
Tfrc	1	6.98	7.51	8.09	8.68	4.89	6.13	8.65	7.39	17.53	18.56	18.48	15.89	15.29	17	10.95	7.26
Tmod1	1	8.91	9.76	9.77	8.92	3.6	5.74	3.65	2.45	22.29	24.41	20.35	15.3	7.86	9.97	4.45	2.34
Tppp	1	7.69	8.98	12.01	11.43	3.29	4.21	4.43	4.94	13.46	19.94	26.97	17.75	6.41	6.63	6.5	4.84
Trnp1	1	0.93	1.19	1.36	2.3	0.84	1.01	0.56	0.63	2	2.9	3.08	2.49	0.95	1.83	1.59	0.54
Tubb4a	1	6.37	5.87	5.52	5.45	4.05	4.54	3.88	6.26	7.21	9.57	13.95	14.62	6.09	5.63	5.26	4.28
Txnip	1	67.45	69.8	66.17	64.05	41.02	40.76	42.46	40.59	117.28	77.66	91.18	80.99	87.57	70.5	55.47	38.21
1700006J14Rik	2	0.15	0.1	0.16	0.23	0.92	0.52	0.61	0.89	0.52	0.28	0.76	0.55	2.12	1.85	2.07	1.4
2410006H16Rik	2	32.82	26.56	24.42	33.16	63.44	80.98	59.78	36.06	37.74	43	28.35	52.89	73.84	75.09	50.43	35.09
3300005D01Rik	2	0.14	0.35	0.35	0.37	0.85	1.3	1.44	1.08	1.17	0.65	1.1	1.11	2.02	2.54	1.58	1.44
A930006K02Rik	2	1.88	1.04	1.62	0.79	5.4	6.6	4.28	4.67	2.5	1.56	2.72	1.72	3.28	4.81	2.39	0.89
Acpp	2	0.14	0.18	0.2	0.18	1.26	1.13	0.95	1.11	0.28	0.65	0.66	2.2	2.15	2.49	2.61	2.32
Acy3	2	0.32	0.23	0.15	0.33	0	0	0.63	0.98	1.29	0.72	1.62	1.29	1.83	3	1.42	0.38
Ankrd66	2	0.28	0.35	0.35	0.46	2.18	0.4	1.35	0.86	1.38	0.92	1.01	1.47	1.6	2.14	2.27	2
Arhgap18	2	20.01	17.35	21.97	19	34.8	33.29	35.5	35.77	39.04	37.17	37.95	32.25	47.35	39.49	36.63	37.84
Atp6v0d2	2	1.87	1.11	3.05	1.64	6.24	5.36	15.18	5.18	6.53	5.95	7.73	5.59	16.73	3.45	13.54	5.88
Bank1	2	0.77	0.75	0.84	0.86	2.52	2.85	1.97	2.52	1.83	1.56	1.03	0.93	3.44	4.4	1.99	1.24
Bcam	2	0.09	0.22	0.36	0.48	1.03	2.31	1.98	1.45	0.49	1.73	0.71	0.78	5.24	5.47	6.62	6.08
Btg2	2	69.91	78.93	75.33	70.37	142.19	164.97	117.41	143.88	207.9	161.62	141.02	101.5	167.64	198.47	131.72	186.92
C1qtnf1	2	1.06	0.68	1.2	1.95	3.77	4.26	4.21	3.91	7.59	7.28	6.6	5.72	13.07	16.63	8.64	3.6
Ccl12	2	19.9	12.97	17.69	15.05	76.6	98.78	90.59	38.86	55.41	39.62	31.51	45.02	94.4	107.33	54.19	14.45
Ccl2	2	172.49	193.23	234.28	221.81	561.4	774.31	656.25	406.17	589.33	693.33	516.24	570.44	760.3	1081.82	723.62	290.51
Ccl24	2	48.03	50.41	61.78	50.19	73.53	115.15	116.74	47.02	214.05	223.07	196.51	171.82	218.86	270.19	247.04	64.54
Ccl4	2	159.51	145.96	142.64	136.48	642.7	711.87	500.71	340.2	223.78	236.57	169.85	189.74	449.81	601.95	358.18	192.82
Ccl7	2	443.35	470.79	628.37	605.29	1515.2	1743.12	1673.37	1006.8	1640.27	1775.02	1511.36	1670.37	2237.12	2686.62	1826.29	635.67
Ccl8	2	147.16	104.68	278.58	234.32	680.57	684.38	648.8	316.08	542.6	299.86	391.62	536.27	918.51	736.34	502.06	133.41
Cd163	2	46.53	45.58	58.46	73.92	54.78	84.88	77.03	108.36	156.05	164.96	179.93	163.54	174.32	187.81	147.17	136.92
Cd1d1	2	0.42	0.32	0.6	0.75	1.96	2.75	2.62	2.17	0.92	0.66	0.42	0.72	3.65	4.73	3.96	2.77
Cd209b	2	2.79	2.25	5.03	4.73	12.99	22.83	11.81	9.05	14.71	10.96	8.39	13.51	29.97	41.69	17.99	9.82
Cd209d	2	7.24	8.88	14.69	16.18	44.33	88.95	45.37	46.73	58.95	53.29	31.39	58.69	141.38	187.14	85.97	122.98
Cd209e	2	0.4	0.58	0.89	1.09	4.28	4.81	2.7	2.89	3.1	2.96	1.79	2.97	8.41	11.6	6.66	5.42
Cd209f	2	5.83	7.5	13.52	11.72	32.08	77.99	56.49	26.56	37.15	39.46	29.24	34.46	103.87	161.12	88.72	19.82
Cd209g	2	2.48	3.31	5.34	5.96	16.83	37.37	21.47	11.07	15.7	18.24	12	14.52	51.17	74.57	35.98	8.39
Cd300ld2	2	0.65	0.89	1.23	1.13	5.24	3.33	3.1	3.58	6.67	3.73	2.22	3.56	5.63	5.48	4.07	0.97
Cd300ld3	2	2.7	0.82	3.08	3.16	8.29	8.17	6.26	2.39	4.41	4.98	2.74	3.42	5.35	5.17	3.19	1.08
Cd38	2	3.77	2.51	7.47	6.05	9.83	7.27	14.82	12.37	18.48	16.84	18.5	17.78	29.28	21.59	18.15	10.03
Cebpb	2	111.12	400.7	330.03	717.58	327.8	1017.91	822.8	1039.54	553.97	518.5	385.6	655.18	921.57	575.04	973.31	403.74
Cebpd	2	17.28	19.57	21.75	20.34	27.41	34.55	23.62	21.79	44.54	49.34	36.09	46.7	43.66	46.7	28.54	20.23
Cfd	2	0.39	15.55	0.37	12.35	1.13	1	2.7	17.81	1.23	0.79	6.37	1.71	3.56	19.71	2.32	0.62
Cfp	2	79.19	75.43	114.82	113.65	307.03	220.27	300.55	330.3	254.61	232.27	240.46	246.32	437.69	456.19	494.32	472.15
Chp2	2	20.96	20.92	26.14	20.91	21.22	32.08	23.6	14.58	67.56	59.21	43.7	43.25	46.58	62.06	23.02	7.91
Chrna5	2	0.06	0.07	0.09	0.08	0.06	0.47	0.79	0.77	0.3	0.24	0.48	0.32	1.93	3.47	3.33	3.28
Clec10a	2	6.32	6.72	9.35	9.75	22.94	32.93	24.11	23.35	41.31	37.87	25.49	29.15	53.28	65.42	32.79	22.9
Clec4a1	2	13.16	11.52	16.53	19.12	61.72	48.28	54.78	51.58	23.85	33.9	39.4	42.22	61.27	56.42	56.14	45.97
Clec4a3	2	39.85	33.02	45.16	46.99	123.67	105.81	120.01	92.03	78.1	74.69	70.4	75.3	116.46	111.54	113.57	95.74
Clec4n	2	10.63	12.12	16.91	13.88	25.92	30.71	36.29	21.06	24.72	25.09	23.74	24.45	21.72	18.57	20.95	9.67
Cxcl12	2	0.33	0.22	0.3	0.85	1.31	2.3	1.04	1.37	1.44	0.99	0.56	0.88	4.49	4.43	1.89	1.21
Cyp27a1	2	19.21	17.78	15.31	17.53	36.56	36.37	25.56	29.35	40.6	45.7	35.13	24.49	44.19	46.24	27.5	21.36
D730003I15Rik	2	1.98	1.02	1.2	1.18	4.28	4.79	2.79	1.66	3.25	1.93	1.49	2.4	6.71	3.51	3	2.89
Diras2	2	0.14	0.19	0.45	0.28	0.21	1.63	1.09	1.41	2.33	4.07	2.53	1.82	2.34	4.76	4.9	3.41
Dok2	2	43.3	51.51	51.67	40.16	72.72	89.28	106.91	82.65	88.9	105.13	104.18	84.44	117.23	108.17	138.1	105.81
Dpt	2	1.55	0.74	1.06	5.26	3.34	3.81	2.27	2.3	2.84	4.29	1.55	4.3	2.64	10.22	4.31	4.07
Egr1	2	51.27	43.45	40.77	38.43	65.37	84.86	56.46	50.03	109.96	82.13	74	50.94	115.42	125.05	83.99	50.68
Egr2	2	7.5	7.4	6.76	6.84	12.4	16.74	12.89	12.29	18.4	17.16	15.42	11.56	18.8	22.31	20.74	13.57
Fcgr2b	2	30.86	29.44	34.22	34.4	56.28	55.52	60.27	51.11	56.07	46.19	44.53	53.24	71.86	71.15	61.7	58.47
Fh1	2	11.36	12.48	13.52	13.37	20.73	16.8	19.7	23.37	25.32	21.68	19.36	21.57	29.45	28.36	24.19	25.98
Fos	2	242.18	207.52	214.41	240.51	460.25	379.1	360.46	320	499.39	254.79	306.2	281.29	562.59	553.69	440.59	322.94
Foxred2	2	0.82	0.46	0.51	0.97	1.97	3.24	1.84	3.27	2.54	3.23	2.3	2.09	3.89	4.29	2.38	2.76
G530011O06Rik	2	13.4	9.1	7.04	8.7	44.42	34.09	13.55	10.67	48.74	33.84	14.78	21.3	58.98	46.24	10.81	8.45
Gadd45g	2	17.75	19.28	20.45	18.31	53.45	56.41	37.14	28.72	32.76	29.81	21.18	28.98	48.04	51.88	38.06	31.39
Gas7	2	3.16	3.05	3.85	3.5	7.84	7.2	6.34	6.12	6.73	8.95	8.54	7.91	7.34	9.15	7.43	5.17
Gbp3	2	1.4	1.99	1.45	2.03	4.85	2.19	3.66	2.95	3.71	3.97	2.52	2.43	4.47	5.25	4.44	3.76
Gfra2	2	1.72	1.57	3.82	2.9	5.48	8.23	8.42	10.94	14.39	15.57	15	15.17	18.76	22.98	22.54	26.13
Gm10382	2	4.82	2.35	2.96	3.58	7.22	5.43	4.33	7.63	7.39	5.4	9.9	6.11	10.57	7.33	8.93	7.93
Gm12902	2	1.13	2.16	1.42	0.76	4.06	6.52	4.05	1.76	0.71	2.63	2.76	3.4	2.96	4.56	0.89	1.43
Gm13919	2	1.32	1.2	1.3	1.21	0.58	1.3	0.7	0.67	5.52	4.37	4	3.06	2.57	4.69	3.25	0.91
Gm15726	2	1.67	2.05	2.46	2.89	8.48	6.45	3.03	4.68	10.97	8.09	4.36	2.63	12.49	11.1	1.68	2.26
Gm23935	2	146.82	134.06	215.96	90.31	245.61	322.43	264.1	224.7	103.96	176.38	175.25	277.28	301.12	301.32	498.99	250.09
Gm4955	2	0.45	0.2	0.39	0.32	2.48	0.91	2.69	1.4	0.26	0.21	0.29	0.38	3.81	1.82	0.53	0.79
Gm5617	2	11.88	13.3	7.3	7.62	24.89	14.09	14.96	16.44	13.09	13	12.33	11.68	28.53	27.66	21.53	11.04
Gm8113	2	0.09	0.13	0.21	0.36	2.6	2.61	2.96	2.21	0.25	0.67	0.37	0.36	5.45	8.51	6.93	4.35
Gm8818	2	4.17	1.22	3.16	2.69	6	5.89	10.42	5.63	10.12	5.78	6.36	7.55	9.71	10.36	7.24	6.26
Gm9949	2	1.64	1.2	1.42	0.64	4.22	2.18	4.19	1.77	2.96	2.14	5.54	3.67	3.96	4.23	3.27	1.31
Gprc5c	2	2.53	2.52	3.88	3.41	3.73	4.44	4.68	5.02	13.72	14.27	11.68	9.43	10.11	11.56	6.22	3.37
Gstp1	2	3.36	3.36	8.28	10.36	37.33	25.32	31.79	33.24	33.27	28.16	22.43	38.87	39.19	43.14	41.73	28.55
Gstp2	2	1.26	1.65	1.04	3.98	4.76	8.35	6.62	2.8	17.02	8.65	10.52	13.11	10.18	18.49	11.51	3.88
Hbegf	2	2.96	3.42	4.85	4.8	11.85	25.67	11.89	9.22	10.23	11.28	8.04	9.79	15.94	29.9	16.32	5.67
Ifi47	2	2.62	2.13	2.48	2.25	6.06	6.1	7.08	4.1	4.59	4.47	2.78	3.75	7.84	6.8	5.15	3.21
Ifit1	2	3.29	3.27	3.3	2.68	5.52	8.75	15.08	3.2	5.32	4.01	1.46	3.11	7.74	13.36	6.24	4.46
Ifit3	2	7.51	5.51	5.88	3.58	21.97	15.27	18.95	7.73	8.1	8.05	3.05	5.71	14.03	15.09	5.98	2.57
Ifitm3	2	140.78	96.14	145.92	173.17	564.08	526.84	616.79	464.24	536.53	369.46	320.7	468.2	841.19	923.96	710.42	548.87
Igfbp4	2	25.68	27.31	36.77	35.97	63.93	54.39	66.96	48.4	67.35	67.27	66.83	64.3	83.19	101.26	68.32	27.03
Ighd	2	0.19	0.49	0.35	0.28	1.15	1.81	0.32	0.74	1.35	1.67	1.02	0.65	3.13	2.9	1.1	1.06
Ighm	2	28.2	33.27	41.43	26.19	150.4	177.02	133.61	122.08	135.71	131.15	96.14	79.44	206.39	228.93	127.12	61.61
Isg15	2	6.1	3.22	3.92	6.16	24.92	21.18	21.64	16.64	6.63	6.41	4.11	7.24	26.21	23.47	21.17	12.32
Jun	2	240.82	237.41	238.57	199.5	208.14	207.27	164.36	139.89	540.22	370.03	325.32	284.22	346.52	393.98	271.74	166.26
Kcng2	2	0.13	0.12	0.09	0.07	0.99	0.78	0.96	1.04	0.15	0.13	0.33	0.13	1.09	2.16	1.08	0.93
Kmo	2	0.49	0.29	0.45	0.36	3.04	2.29	1.47	2.14	1.99	1.77	1.33	1.04	4.12	4.44	2.6	3.71
Lifr	2	3.59	3.06	5.17	5.69	8.38	9.59	7.71	7.65	14.09	13.21	13.91	13.01	12.89	12.69	9.1	8.67
Lpar1	2	0.19	0.14	0.31	0.48	0.57	1.02	0.96	1.13	1.2	0.96	0.66	0.8	1.78	2.06	1.68	1.93
Lum	2	3.57	4.58	8.9	17.66	1.83	8.48	13.48	14.09	3.41	7.24	4.65	13.24	13.38	23.47	13.5	13.19
Mamdc2	2	11.66	15.47	17	12.92	20.19	28.24	21.38	28.9	33.15	40.39	42.53	28.99	21.68	25.73	31.51	33.99
Marco	2	0.26	0.15	0.15	0.53	1.88	0.92	4.03	1.93	0.65	0.37	0.92	1.48	2.82	2.56	1.87	1.2
Mcoln2	2	3.61	3.72	4.9	4.99	8.21	9.56	8.41	6.28	11.97	11.79	10.36	11.04	11.78	11.36	11.01	4.58
Mmp9	2	0.23	0.22	0.44	0.47	10.16	8.92	6.23	8.23	11.99	17.31	18.82	39.12	22.88	33.48	17.89	13.57
Mrps6	2	8.31	7.55	8.47	7.92	13.95	13.82	14.93	11.79	11.78	13.46	11.4	12.96	16.22	18.54	22.25	15.52
Ms4a8a	2	1.34	1.28	1.31	1.9	5.86	5.87	6.67	4.52	6.36	6.76	3.49	5.17	13.05	14.72	9.75	8.4
Mt1	2	72.12	68.69	84.26	82.01	145.33	192.31	180.13	138.74	175.89	158.58	140.61	202.45	255.51	314.31	227.98	158.98
Mt2	2	7.55	5.92	13.57	15.81	20.67	25.7	31.78	22.44	32.2	28.7	27.66	45.85	45.73	53.79	48.65	41.05
Myl9	2	0.15	0.14	0.37	0.4	1.21	1.91	4.16	1.97	1.33	0.83	1.16	1.81	1.67	3.28	2.48	1.11
NoGeneName	2	6.16	6.27	4.79	4.6	20.39	21.76	17.29	12.02	12.72	14.45	9.93	10.08	22.95	30.84	24.64	11.94
NoGeneName	2	4.04	2.41	2.67	3.18	11.84	15.41	7.91	6.33	5.43	5.93	5.14	2.9	11.01	12.23	8.11	5.83
NoGeneName	2	0.78	0.67	0.37	0.32	2.54	2.46	1.23	0.59	2.51	3.68	2.3	1.97	3.02	1.24	2.77	0.82
NoGeneName	2	13.14	8.6	9.17	6.07	17.42	28.86	15.78	10.53	9.17	8.25	5.15	7.9	13.12	23.44	16.37	6.76
Nt5dc2	2	15.26	14.73	18.87	18.55	54.4	49.36	60.83	52.52	12.8	19.37	19.88	23.07	74.17	62.96	49.57	25.41
Oasl1	2	0.61	0.75	1.15	1.08	3.62	5.31	6.44	3.01	2.46	2.69	2.17	2.12	8.21	7.26	5	2.53
P3h2	2	1.21	3.07	2.52	2.58	1.19	6.1	3.89	3.4	10.98	10.52	9.81	5.78	7.27	8.98	5.62	3.22
Pcolce	2	0.68	0.98	0.99	1.95	1.21	3.08	2.44	3.16	1.49	1.52	1.05	2.9	3.05	4.68	3.25	2.98
Pf4	2	652.12	573.37	843.63	782.24	1576.43	1512.9	1733.51	1045.29	1906.23	1698.01	1867.11	2410.26	2037.46	2259.64	1821.03	637.16
Pla2g2d	2	0.68	0.89	1.35	0.98	1.86	7.2	2.78	1.65	5.95	8.08	3.13	3.32	9.83	10.62	6.1	1.5
Plvap	2	0.61	0.47	1.09	7.96	0.07	1.06	0.24	3.25	1.32	0.73	2.96	3.98	10.61	6.2	0.22	8.33
Ppbp	2	2.46	2.89	4.31	6	25.13	20.97	26.6	18	11.79	12.41	10.56	12.12	29.25	18.88	17.82	12.63
Ptgs1	2	1.3	1.38	1.03	1.32	5.48	5.24	3.84	3.83	1.59	1.7	1.83	3.34	4.24	5.89	3.39	3
Ralgds	2	6.31	8.99	7.94	8.94	13.19	12.59	12.09	13.94	13.89	22.03	20.09	14.62	13.43	17.83	13.64	8.3
Rem1	2	0.42	0.44	0.73	0.39	0.61	0.69	1	0.62	1.09	1.83	1.26	0.85	2.43	2.89	3.98	3.37
Retnla	2	63.89	111.91	83.67	56.57	1308.18	3048.52	1599.4	856.15	648.32	771.12	298.27	319.4	6155.39	11117.1	6276.85	3371.2
Rgl1	2	23.86	26.71	29.63	26.32	44.06	46.48	38.74	31.25	60.38	64.6	60.11	53.18	56.18	65.19	43.28	20.32
Rn7sk	2	5.5	3.85	4.82	2.22	5.14	5.16	8.24	4.45	10.33	8.42	7.04	10.65	14.4	16.04	19	3.82
Rnd3	2	5.68	6.55	8.92	7.93	21.16	17.33	18.43	18.28	24.16	20.59	24.99	23.14	31.85	27.78	23.01	23.19
Rpl37a	2	45.77	41.24	38.62	38.92	104.7	120.82	104.97	95.35	59.79	49.28	43.93	60.5	109.73	136.28	117.96	74.9
Rpl41	2	24.41	24.09	20.33	17.53	45.68	53.83	52.46	43.05	26.38	27.61	20.6	30.23	48.36	52.57	53.71	30.26
Rps29	2	138.1	111.43	117.46	104.27	253.69	255.3	288.6	216.57	170.07	133.8	124.95	203.3	264.07	294.5	298.12	180.75
Rsad2	2	1.44	1.41	1.63	1.34	3.57	3.58	8.26	2.89	2.44	2.06	1.41	1.69	4.72	3.82	2.49	1.42
Sde2	2	29.87	31.32	32.15	28.05	59.68	63.97	63.55	66.11	45.07	54.25	50.95	45.55	62.54	78.33	64.47	64.19
Sema4a	2	2	2.62	2.64	2.43	4.92	5.85	4.97	6.93	8.07	9.01	7.85	5.89	7.9	8.38	7.17	7.67
Sertad1	2	79.57	85.44	119.18	93.13	179.85	216.58	193.11	138.86	191	209.68	202.06	191.3	215.15	254.96	204.51	127.26
Siglech	2	1.13	1.51	1.53	1.25	1.76	3.63	1.87	1.24	5	5.64	3.79	2.61	3.51	6.41	2.05	0.93
Slc14a1	2	1.01	1.26	0.98	1.08	4.9	3.41	2.56	3.67	4.57	3.97	3	3.2	5.05	7.82	3.52	2.96
Slc7a13	2	0.23	0.87	0.37	0.29	1.28	0.49	1.55	0.85	3.35	2.77	1.81	1.53	2.82	2.16	1.47	0.43
Smim24	2	0.77	0.41	0.59	0.19	2.18	2.03	2.78	1.76	1.77	1.01	1.06	1.59	1.85	1.66	1.25	0.96
St3gal6	2	2.59	2.42	2.77	2.26	3.85	4.61	3.71	2.08	6.95	6.8	5.87	4.93	5.34	5.18	2.94	1.06
Timd4	2	43.31	46.46	36.51	40.78	23.54	41.44	22.58	18.36	58.58	63.94	45.26	47.61	53.15	88.87	41.31	43.01
Tlr5	2	0.98	0.81	0.94	1.22	1.33	1.73	1.74	1.79	3.41	3.36	2.7	2.72	2.31	3.58	1.56	0.8
Tmem8	2	3.05	3.34	4.6	5.91	6.41	4.06	6.97	6.76	10.65	8.2	9.73	10.31	9.35	9.89	6.76	6.68
Tnfrsf17	2	4.91	3.98	8.11	4.81	9.47	9.18	9.74	3.34	19.16	17.98	13.62	15.96	12.35	18.44	7.37	1.41
Tpsb2	2	0.9	1.5	0.42	1.47	0.48	0.36	3.62	2.94	6.85	3.81	0.82	3.49	8.04	1.36	0.53	3.83
Trf	2	7.07	7.76	8.27	7.43	13.41	16.98	12.98	12.95	12.34	12.88	11.4	10.2	20.12	24.8	14.55	14.25
Tslp	2	9.42	9.71	10.36	13.2	8.66	18.19	12.87	8.4	28.36	32.61	22.63	30.9	28.43	33.41	19.3	6.39
Tspan32	2	0.96	0.9	0.93	1.02	4.09	3.35	3.99	3.2	2.44	2.57	1.95	2.25	4.7	4.65	4.63	3.78
Ugcg	2	5.5	7.89	7.97	12.04	13.16	18.3	17.72	22.15	17.97	20.49	15.65	14.1	17.59	16.8	18.84	16.93
Zfp36	2	151.33	121.69	157.81	171.44	344.69	323.68	317.59	312.36	369.58	309.4	328.48	301.87	373.44	481.54	402.83	306.21
Zfp36l1	2	7.57	6.87	9.62	8.15	20.59	19.51	15.4	14.27	12.4	13.4	12.59	12.61	22.06	23.07	16.57	15.17
Zfp948	2	6.27	6.83	7.59	8.96	9.52	11.01	13.93	11.37	18.59	19.48	19.76	15.78	16.71	18.3	16.36	11.14
1700017B05Rik	3	18.29	16.94	18.73	17.99	11.76	10.87	12.54	9.57	14.73	15.5	17.12	14.54	9.52	10.56	8.77	4.59
1810011O10Rik	3	78.21	50.8	57.46	49.23	9.42	5.67	5.84	1.82	41.1	30.94	36.77	26.61	2.41	3.76	3.09	0.83
2010111I01Rik	3	29.34	24.88	28.9	26.12	10.68	10.93	10.8	7.7	18.39	18.62	21.06	18.61	5.14	4.54	5.65	4.22
2510009E07Rik	3	60.88	56.86	50.23	57.7	7.25	5.87	7.18	12.23	8.19	11.28	13.07	9.18	3.18	2.69	6.42	9.11
2810025M15Rik	3	14.06	11.79	12.66	14.2	3.96	4.73	5	4.33	14.01	12.66	13.4	12.49	5.4	6	4.77	2.17
3110082I17Rik	3	8.12	7.44	6.61	7.93	4.42	3.23	3.88	3.03	6.16	4.07	4.42	3.91	4.11	1.93	3.52	2.76
4930486L24Rik	3	7.47	4.84	5.01	3.41	1.44	0.87	0.61	1.58	2.34	1.78	3.01	2.85	2.87	0.66	0.42	0.25
4932438H23Rik	3	1.31	1.25	1.45	1.78	0.18	0.37	0.29	0.12	1.49	1.29	1.18	1.68	0.19	0.43	0	0.08
A630033H20Rik	3	11.74	10.65	12.93	10.62	4.91	3.55	7.21	5.25	9.34	9.53	12.75	9.38	5.44	4.2	5.87	4.62
A930011G23Rik	3	34.23	30.91	32.66	30.87	21.18	20.42	23.23	18.37	18.75	17.64	22.28	18.44	13.57	12.98	14.6	11.04
Abcc3	3	15.73	19.07	18	17.9	8.59	7.59	7.46	9.6	8.36	12.7	15.96	9.73	5.04	4.56	4.18	2.46
Abcd4	3	32.25	36.56	31.44	34.73	11.34	14.34	10.55	10.54	40.18	34.18	36.59	30.74	15.14	15.11	10.75	5.6
Abhd15	3	1.97	1.94	1.36	2.22	1.31	1.49	0.8	1.38	0.52	0.26	0.3	0.33	1.29	0.03	0.54	0.78
Acap3	3	3.83	5.29	3.62	4.16	0.71	1.86	1.44	2.03	3.27	5.21	5.07	3.78	2.03	1.77	2.42	2.33
Actn1	3	2.69	2.08	2.58	2.24	0.84	1.29	0.85	1.17	0.96	1.02	1.65	1.71	0.51	0.64	0.45	0.79
Adam15	3	31.31	33.67	27.95	30.73	13.38	13.25	13.88	16.03	21.09	23.26	22.36	20.16	17.5	17.01	18.85	18.72
Adam33	3	2.01	1.86	1.31	1.82	0.25	0.5	0.26	0.32	1.51	1.35	1.13	0.85	0.68	0.55	0.19	0.13
Adam9	3	40.36	41.93	38	42.57	17.8	18.28	20.36	22.2	32.44	30.34	34.72	29.92	20.93	17.42	17.68	14.77
Adamtsl5	3	11.14	12.11	10.4	10.7	2.01	2.19	1.5	1.33	9.53	9.85	9.41	7.8	2.78	3.85	2.67	0.8
Adcy3	3	1.45	1.73	1.89	1.74	0.29	0.22	0.18	0.19	0.93	1.35	1.43	1.32	0.24	0.32	0.16	0.12
Adgre5	3	81.61	97.46	76.05	75	32.86	40.68	33.99	44.97	41.24	51.16	48.25	37.11	23.89	31.31	36.64	42.27
Afap1l1	3	5.35	6.9	5.41	5.65	1.26	0.85	0.82	0.81	5.84	5.24	5.07	4.31	1.01	2.65	0.6	0.29
Agmo	3	7.42	8.52	7.36	6.77	2.14	3.5	3	1.38	7.37	7.93	7.56	6.7	3.78	4.25	3.13	1.87
Ahnak2	3	9.17	7.16	8.48	8.26	3.07	2.98	3.34	2.33	7.73	5.92	5.55	5.22	2.47	2.57	2.27	1.95
AI427809	3	8.81	8.55	9.42	8.34	3.77	3.99	4.38	3.26	4.26	4.5	5.49	3.75	3.89	2.54	4.18	1.82
Ak1	3	1.54	1.44	1.77	2.02	0.73	0.37	0.54	0.48	0.69	1	0.98	1.02	0.38	0.23	0.46	0.18
Amotl1	3	1.41	1.3	1.07	1.25	0.1	0.14	0.06	0.1	0.48	0.65	0.54	0.5	0.08	0.2	0.08	0.14
Angptl2	3	3.09	4.34	3.14	3.52	0.55	1.06	1.23	2.39	1.06	1.76	2.04	1.67	0.31	0.72	0.82	1.15
Ankrd28	3	4.18	4.05	4.42	5.09	1.35	2.33	1.29	1.93	3.6	3.89	4.69	4.07	2.13	0.82	1.34	1.01
Anxa3	3	61.2	53.09	49.19	49.06	28.62	26.49	25.45	16.67	28.29	27.9	26.57	28.1	19.64	16.52	18.49	10.56
Aplp1	3	1.91	2.11	2.59	1.69	0.28	0.44	0.41	0.48	0.79	1.25	1.45	1.22	0.37	0	0.74	1.15
Apold1	3	3.47	3.86	5.08	6.6	1.14	1.44	0.96	0.95	3.96	4.35	4.39	3.82	0.45	0.98	1.2	0.71
Arhgap22	3	5.19	6.99	5.34	4.45	1.56	1.17	1.4	1.27	2.98	3.78	3.82	2.88	0.49	0.66	1.12	1.01
Arhgap23	3	2.54	2.61	1.96	2.58	0.47	0.63	0.47	0.98	0.82	1.82	1.9	1.79	1.05	0.88	0.81	1.2
Arhgef3	3	76.63	74.02	68.61	75.89	34.49	31.6	29.82	36.52	117.24	103.83	95.79	78.68	61.29	62.66	37.95	28.6
Arl11	3	54.75	59.38	50.53	48.54	29.4	33.93	28.63	19.04	47.98	32.53	32.05	31.09	24.95	33.01	19.67	10.55
Armc5	3	11.47	13.66	11.61	10.37	3.16	5.24	3.64	7.23	10.13	12.37	14.17	10.06	5.28	5.34	7.43	4.65
Arpin	3	12.25	15	15.07	15.29	4.71	6	6.51	4.58	20.27	17.4	16.57	15.91	8.38	5.66	6.59	3.69
Arsb	3	83.92	115.11	69.4	76.81	9.91	16.03	10.4	13.53	16.06	24.69	21.62	14.66	9.08	12.12	8.31	12.05
Asb10	3	1.4	1.77	0.99	1.69	0.07	0.15	0.4	0.21	0.8	1.12	0.92	0.37	0.22	0.26	0.22	0.04
Atp2a3	3	12.21	18.65	11.94	13.33	1.25	1.93	1.64	5.09	5.59	10.4	7.97	6.65	1.33	2.75	3.02	5.84
AU020206	3	7.28	6.54	6.44	7.76	3.96	4.12	1.94	2.69	0.78	0.63	0.61	0.33	1.24	0.49	1.44	0.75
B3galnt1	3	46.47	38.48	50.41	44.96	20.58	16.83	18.18	12.3	53.44	44.68	48.22	44.06	26.75	29.03	19.03	6.75
B3gnt3	3	23.74	23.8	24.85	23.63	5.35	7.18	8.38	6.12	34.54	31.12	39.2	31.16	12.28	8.54	6.83	5.16
B3gnt8	3	2.78	3.24	2.55	2.42	1.39	1.48	1.62	1.39	1.97	1.63	2.35	1.8	0.95	1.06	0.61	0.52
B4galt1	3	37.54	42.03	39.65	40.16	23.11	23.5	21.53	26.13	21.12	23.7	28.28	24.24	18.65	16.06	16.66	14.1
B4galt7	3	11.49	11.22	10.53	9.64	5.34	2.81	4.91	3.77	5.3	4.26	5.51	5.62	4.02	1.59	4.26	2.61
B4gat1	3	25.57	29.41	26.72	26.68	12.22	7.35	16.83	14.2	27.22	26.01	27.33	23.96	11.66	20.71	12.29	9.38
Bach2os	3	2.82	2.33	1.85	2.42	0.51	1.27	0.55	0.44	0.13	0.09	0.13	0.28	0.08	0.35	0.33	0.18
Bag5	3	18.06	16.22	18.51	15.26	6.59	8.17	9.05	9.8	19.16	17.14	19.46	17.2	13.52	13.61	9.66	8.08
BC100451	3	4.75	6.01	4.6	4.35	2.03	1.81	1.27	0.83	3.86	3.04	3.41	3.94	1.58	1.05	1.85	1.07
Bcl2	3	3.41	3.54	2.66	2.8	2.01	1.98	1.41	1.67	2.49	2.4	2.78	2.25	0.82	1.45	0.81	0.86
Bhlhe40	3	108.38	96.7	87.06	81.67	43.05	52.49	55.74	78.02	27.22	34.86	34.11	27.32	27.42	26.54	63.87	117.41
Bhlhe41	3	2.61	1.77	2.26	1.78	0.71	1.21	0.94	0.66	1.73	2.11	1.33	1.3	0.66	0.48	0.53	0.32
Bin1	3	76.42	76.99	64.16	64.78	42.84	34.97	31.6	28.88	45.22	36.96	38.21	42.52	37.8	34.94	28.59	23.45
Bmp2	3	13.41	14.98	14.36	15.2	3.94	5.91	4.67	3.09	17.15	17.51	17.11	14.19	8.02	8.42	5.39	2.75
Bok	3	1.14	1.77	1.49	1.54	0	0.06	0.27	0.18	0.44	0.19	0.48	0.56	0.12	0.18	0.16	0.13
Btnl2	3	8.47	7.84	7	6.69	4.19	2.74	2.13	1.3	5.98	5.27	4.37	5.12	4.48	6.85	4.04	1.32
C130050O18Rik	3	8.12	8.04	7.26	6.94	2.05	1.35	1.9	1.39	3.2	2.49	3.3	2.62	1.31	1.22	1.26	1.09
Calcrl	3	14.47	12.88	15.53	14.48	5.13	4.93	4.69	6.35	5.73	5.65	6.17	5.77	3.66	4.2	4.02	5.26
Camk1	3	119.57	116.81	104.06	101.39	44.96	43.81	41.31	27.89	68.92	65.03	64.08	58.75	41.41	41.27	34.22	17.13
Camk2d	3	4.4	3.67	4.07	4.13	2.04	1.27	1.77	1.75	2.04	1.9	2.25	1.76	1.11	1.13	1.06	0.8
Capn5	3	6.99	7.16	4.74	6.71	1.4	1.52	2.06	3.32	1.95	2.62	3.73	2.85	2.89	2.85	3.76	5.78
Cbr2	3	591.89	537.89	535.54	536.53	308.61	290.29	287.64	188.12	543.17	438.26	386.09	465.04	441.09	517.13	303.82	115.09
Cbr3	3	21.56	19.89	18.9	16.13	10.51	8.86	6.79	5.91	12.86	15.22	14.13	13.82	13.31	11.3	9.65	4.32
Ccr1l1	3	1.46	2.28	2.54	2	1.46	1.13	0.3	0.19	1.47	1.35	0.67	1.88	1	0.29	0.12	0.49
Ccr5	3	25.58	24.16	20.64	18.82	12.64	9.5	13.14	15.34	5.09	5	4.55	3.49	6.44	5.01	7.94	17.14
Cd109	3	46.31	47.71	41.55	46.25	7.94	7.92	8.21	10.08	19.94	26.27	30.41	21.88	3.85	5.32	6.81	4.46
Cd200r4	3	4.59	4.93	4.79	4.41	1.4	2.2	2.03	1.42	1.1	0.73	0.77	0.49	2.52	0.66	3.09	2.8
Cd276	3	28.3	32.28	25.1	26.47	5.48	5.93	4.95	5.24	5.04	8.8	9.08	5.78	1.92	3.06	2.96	1
Cd300c2	3	61.06	50.76	49.14	55.23	81.61	63.37	64.35	47.12	18.01	14.37	16.24	15.27	25.44	20.25	27.3	20.93
Cd33	3	58.43	54.33	54.59	59.3	41.03	44.38	36.85	32.88	44.54	48.79	45.94	41.12	31.45	37.25	24.6	14.89
Cd9	3	425.49	432.26	433.8	377.12	126.31	157.82	165.25	169.39	233.31	251.55	270.9	266.24	68.95	49.49	166.54	250.96
Cdc25b	3	5.57	6.16	5.03	5.9	3.03	2.73	1.7	3.38	3.43	6.02	4.54	3.88	3.05	2.11	2.02	1.86
Cdk18	3	3.18	3.41	2.22	3	1.27	0.84	0.61	0.78	0.53	0.09	0.38	0.44	0.24	0.29	0.57	0.03
Cdkn2c	3	12.82	15.93	14.66	13.29	8.34	10.61	8.35	7	10.42	10.87	9.56	13.15	7.4	7.23	5.55	6.14
Cebpzos	3	14.37	14.3	13.5	13.7	9.82	7.08	7.65	5.23	6.4	5.66	5.19	6.96	9.25	6.85	7.15	4.16
Cfh	3	53.59	50.25	48.6	53.15	13.36	17.9	17.08	14.75	53.58	55	53.86	44.41	29.9	30.72	22.4	12.35
Ch25h	3	47.44	47.17	32.67	23.6	5.91	7	4.04	2.69	13.51	12.74	9.54	5.58	1.88	4.18	1.06	0.6
Chd9	3	4.48	4	4.07	3.95	2.6	2.23	2.46	2.23	1.79	1.66	1.68	1.6	1.61	1.41	1.61	1.53
Chek2	3	3.34	3.69	2.82	3.27	1.09	1.27	1.62	1.5	1.45	1.25	1.38	1.56	1.4	0.76	1.06	1.24
Cipc	3	4.29	3.81	3.61	3.42	1.32	1.42	1.52	1.35	1.87	2.16	2.67	1.55	1.02	1.6	1.15	0.78
Clec5a	3	58.46	60.72	61.74	52.39	23.56	24.91	27.58	22.2	38.34	40.77	41.85	38.51	20.34	18.56	19.99	11.06
Clstn1	3	1.79	4.24	2.53	5.34	0.79	0.84	0.83	1.35	2.16	2.29	1.69	1.81	1.23	1	1.66	0.81
Cmah	3	4.85	5.33	4.48	3.6	1.62	2.36	1.3	1.14	6.41	6.74	5.12	3.37	2.91	3.76	1.74	0.65
Cndp1	3	1.77	1.12	1.27	1.95	0.98	0.21	0.13	0.15	1.29	1.73	1.04	0.73	0.33	0.12	0.1	0
Cnrip1	3	8.78	7.86	8.1	8.45	3.88	4.57	3.56	2.21	13.88	12.25	12.7	9.82	4.25	5.8	3.25	1.31
Col14a1	3	1.58	1.92	1.95	1.99	0.88	0.99	0.49	0.83	0.18	0.56	0.43	0.6	0.29	0.22	0.38	0.26
Colec12	3	154.73	155.55	158.41	154.47	22.33	30.31	27.8	21.84	174.68	162.88	175.08	143.9	41.24	45.58	27.71	14.12
Cpd	3	18.14	18.53	19.74	25.69	8.73	10.24	8.02	15.87	8.39	11.76	12.76	13.01	6.09	4.04	6.82	8
Cpne8	3	6.13	4.18	5.58	5.09	0.73	1.44	1.08	0.8	8.21	7.49	7.17	8.27	1.38	1.96	0.86	0.53
Cry2	3	11.21	12.06	10.64	9.73	2.43	1.52	2.48	2.81	9.07	7.7	8.2	7.09	3.03	2.96	2.34	2.04
Cryba4	3	2.52	1.3	1.98	1.65	0.79	0.74	0.51	0.39	0.59	0.58	0.38	0.32	0.46	0.2	0.19	0.1
Cspg4	3	19.45	16.32	16.47	20.26	1.39	0.98	0.71	1.24	2.31	4.26	4.17	2.76	0.25	0.32	0.45	0.22
Ctla2a	3	64.84	35.67	59.27	62.75	3.91	1.72	2.68	3.22	8.3	2.65	7.84	9.3	3.47	0.82	1.04	0.84
Ctla2b	3	74.37	58.68	65.48	76.13	17.73	15.35	14.87	9.9	31.79	23.22	23.89	29.77	12.76	12.87	7.17	3
Ctsd	3	1125.93	1145.44	957.35	1033.98	298.31	246.51	267.67	199.77	167.38	157.28	153.4	145.87	219.14	204.46	221.44	115.88
Ctsf	3	70.19	84.65	65.96	67.45	18.15	36.69	25.87	18.54	72.07	64.27	63.95	54.91	31.65	53.32	26.27	6.46
Cx3cr1	3	85.26	93.68	74.01	67.79	33.14	39.67	26.29	26.59	1.58	2.28	1.28	1.1	2.66	2.91	2.07	1.63
Cxcl14	3	5.06	3.43	5	7.06	2.15	3.02	2.99	5.41	1.06	2.86	0.91	3	3.84	1.67	3.37	2.71
Cxxc5	3	16.56	21.72	17.57	19.75	2.71	3.29	3.44	3.64	6.72	6.24	7.53	7.01	4.2	2.34	2.9	3.04
Cyth3	3	6.66	6.82	6.3	7.04	4.25	3.69	4.49	4.87	8.58	9.27	9.42	7.35	3.49	4.25	4.09	3.31
D8Ertd82e	3	4.89	4.88	4.76	4.42	2.52	2.83	1.95	2.64	2.67	3.23	3.38	2.64	1.24	1.35	1.42	0.65
Dbp	3	8.68	7.65	6.71	6.51	3.1	3.19	3.07	1.64	9.3	6.26	5.49	4.98	4.32	2.89	2.42	1.4
Dnajc18	3	5.91	4.95	6.35	5.48	3.09	2.74	2.59	2.35	3.2	3.4	3.22	2.4	1.78	1.53	1.22	1.29
Dnm1	3	2.42	2.35	2.28	2.97	0.26	0.53	0.38	0.44	2.02	3.35	3.43	2.85	1.28	1.33	0.93	0.49
Dock4	3	5.61	5.24	4.61	6.61	3.23	1.99	1.13	3.49	1.84	2.91	2.26	2.17	1.41	1.18	0.99	1.51
Dok3	3	91	91.59	73.8	80.07	42.57	32.52	30.13	30.72	68.85	64.4	71.29	65.98	35.57	38.08	30.32	15.84
Dok4	3	1.01	1.53	1.55	1.06	0.51	0.07	0.48	0.88	1.87	2.11	2.29	1.77	0.72	0.4	0.44	0.55
Dpysl3	3	8.75	10.03	8.85	8.04	1.73	3.02	2.37	3.03	5.63	5.64	5	4.01	2.12	2.84	3.2	1.65
Dtx3	3	2.92	2.63	2.05	2.65	2.37	1.33	1.14	1.72	0.89	1.82	1.38	1.64	1.08	0.49	0.54	1.01
Dtx4	3	8.02	8.64	7.3	9.89	3.97	4.92	5.04	5.27	2.51	4.54	3.56	4.39	2.81	3.88	2.5	2.79
Ecm1	3	202.95	187.14	197.25	173.45	84.26	97.09	112.95	103.13	228.09	191.02	231.35	186.15	109.17	135.15	196.45	151.76
Ecscr	3	14.36	13.35	12.7	12.68	0.79	0.7	0.71	0.6	0.55	0.2	0.37	0.23	0.2	0.08	0.14	0.17
Eef2k	3	4.88	5.22	4.76	4.63	0.9	1.66	1.46	1.27	4.59	4.19	4.34	3.8	1.72	1.76	1.34	0.71
Eif2ak3	3	4.57	5.75	4.74	5.92	1.73	0.72	2.39	3.11	4.99	4.99	6.04	4.67	2.94	2.59	2.88	3.02
Elmo1	3	36.49	37.25	31.94	32.22	18.55	17.7	15.67	17.61	18.76	17.66	18.92	15	14.11	10.75	11.52	11.73
Emilin1	3	11.46	13.61	11.35	10.62	2.22	2.31	4.83	6.53	3.94	5.84	5.58	5.6	3.03	1.84	4.48	2.81
Endod1	3	23.68	24.21	18.85	21.42	8.42	8.67	6.39	9.83	11.83	9.23	13.43	8.95	6.46	7.43	7.7	6.59
Enpp1	3	8.9	7.87	7.5	7.6	1.05	1.04	0.78	1.31	2.07	1.63	2.14	2.36	0.87	1.28	0.6	0.53
Enpp4	3	1.87	1.53	1.43	1.67	0.15	0.32	0.26	0.38	0.7	1.37	1.27	1.09	0.09	0.35	0.17	0.14
Epb41l2	3	22.8	24.44	21.92	23.1	12.2	11.34	11.32	15.36	10.04	9.43	10.35	8.63	8.26	5.21	8.03	9.19
Ephb6	3	1.6	1.36	2.3	1.69	0	0.28	0.02	0.49	0.77	1.19	1.31	1.04	0.26	1.05	0.82	0.35
Ets1	3	2.57	2.56	2.77	2.64	0.45	0.51	0.46	0.32	0.87	1.12	1.43	2.2	0.62	0.48	0.37	0.3
Eya4	3	4.18	2.92	3.91	3.49	0.9	0.59	0.45	0.48	1.46	0.88	1.32	1.27	0.43	0.12	0.38	0.26
F11r	3	74.51	85.78	60.83	67.58	19.66	23.03	20.2	30.06	10.89	11.21	11.53	8.5	3.1	2.31	7.94	12.23
Fabp3	3	24.02	24.06	20.22	18.76	6.52	4.63	4.61	2.34	5.12	5.15	3.1	3.99	1.42	2.47	2.26	0.7
Fam105a	3	172.03	163.77	151.23	154.47	125.99	94.58	104.33	95.08	99.67	93.39	89.54	95.37	86.48	81.65	76.16	73.12
Fam126a	3	7.82	7.66	6.89	8.37	3.3	4.62	3.65	5.68	8.83	10.35	11.08	8.85	5.37	5.39	4.75	6.92
Fam167b	3	8.93	7.56	6.97	6.55	0.91	0.64	0.58	0.55	3.8	4.04	3.55	3.21	1.77	1.88	0.6	0.08
Fam20a	3	4.45	3.4	3.6	3.77	0.81	1.09	0.88	1.13	2.56	1.82	1.9	1.63	1.27	1.03	1.7	1.63
Fam20c	3	4.03	4.91	3.45	4.71	3.62	3.61	3.32	3.55	1.28	1.5	1.3	1.24	2.08	1.67	3.24	1.63
Fam3c	3	27.94	26.93	25.47	23.64	13.49	12.77	14.1	10.68	16.22	12.66	13.34	12.59	10.75	10.88	9.92	7.16
Fam46c	3	6.94	7.97	6.2	7.96	5.54	7.48	4.19	6.47	0.96	1.31	1.37	1.28	1.07	1.63	2.81	5.72
Fam53b	3	3.64	2.94	2.71	3.18	1	1.15	0.68	1.08	1.69	2	2.04	1.8	1.05	1.18	1.1	0.58
Fbln5	3	18.39	20.48	20.53	17.28	3.12	3.58	3.54	2.29	23.58	25.23	21.29	16.64	3.71	8.01	4.54	1.95
Fchsd2	3	7.14	7.14	5.79	6.23	2.43	2.82	2	1.99	5.45	6.17	5.41	4.34	3.2	2.52	1.87	1.51
Fcna	3	193.4	185.29	195.3	179.02	88.35	124.08	69.62	53.92	239.77	241.19	199.55	209.52	160.57	172.59	91.2	41.02
Fer	3	14.33	14.42	11.65	12.57	4.82	3.01	4.63	3.46	12.7	11.88	12.7	9.96	6.35	7.13	4.87	2.18
Fermt2	3	16.19	15.38	12.41	13.32	1.1	0.55	0.9	1.68	6.36	8.85	7.92	6.57	0.58	1.61	1.01	0.72
Fez2	3	51.34	48.61	47.73	45.79	27.07	24.07	21.8	16.66	50.35	41.27	40.93	42.47	31.79	28.88	22.06	15.19
Fkbp14	3	1.71	1.82	1.86	1.66	0.76	0.82	0.4	0.17	1.65	1.27	1.56	1.55	0.17	0.67	0.42	0.11
Fkbp9	3	25.36	25.09	21.62	27.28	3.75	7.31	5.5	5.73	24.47	26.49	23.61	23.06	7.44	9.97	5.5	3.36
Fmn1	3	2.68	2.11	2.56	2.16	1.43	1.22	0.94	0.8	1.14	1.49	1.53	1.13	0.88	0.58	0.71	0.41
Fmnl3	3	9.48	24.17	19.76	13.17	2.87	3.53	5.55	7.47	3.73	3.06	9.35	6.09	4.32	1.41	4.04	1.71
Fn1	3	33.02	26.79	28.18	41.95	8.24	7.2	8.84	20.05	2.01	3.87	4.11	3.82	6.68	6.32	20.84	28.62
Folr2	3	51.35	59.57	49.79	49.21	24.92	31.56	23.31	14.35	57.9	64.19	47.82	49.39	50.12	68.04	33.72	10.82
Galc	3	21.23	19.42	19.62	24.66	10.48	6.42	7.01	8.18	6.77	11.73	13.71	13.77	6.85	7.54	5.05	4
Gas6	3	552.35	623.31	593.23	551.8	263.07	264.56	282.14	219.62	809.85	785.19	786.66	690.39	543.02	532.73	346.77	144.79
Gde1	3	29.57	32.73	29.71	33.48	18.26	16.97	21.58	19.25	18.14	18.19	17.58	22.23	12.54	9.22	14.66	12.33
Gdpd5	3	9	10.31	8.93	9.11	1.18	1.08	1.71	2.1	2.58	4.35	4.52	3.45	0.63	0.59	0.73	0.89
Ggta1	3	4.59	4.04	3.97	3.95	1.62	2.87	1.81	2.43	0.97	0.66	0.89	1.09	0.42	0.95	0.53	1.21
Gm10605	3	1.85	2.01	1.59	2.25	0.1	0.07	0.12	0.23	1.18	1.29	0.72	1.38	0.25	0.47	0.3	0.03
Gm15539	3	2.36	3.68	2.22	2.38	2.31	0	1.47	0.8	1.01	0.64	1.18	0.43	1.87	0.6	0.76	0.81
Gm16104	3	13.31	12.99	7.67	11.61	2.94	3.93	2.66	2.26	6.54	6.34	4.15	9.7	4.49	6.2	4.28	1.72
Gm26863	3	12.05	10.76	8.4	10.21	2.94	4.21	3.23	1.63	9.86	6.21	10.67	8.57	2.55	4.16	5.96	2.03
Gm5834	3	6.38	8.91	7.44	9.2	1.91	1.66	2.08	2.65	6.33	6.38	6.82	7.47	4.23	4.18	2.93	1.46
Gmpr	3	15.78	14.57	13.15	12.07	5.83	3.11	5.75	3.34	6.51	7.1	6.38	6.29	1.56	2.19	1.85	0.58
Gna15	3	54.91	54.94	44.8	45.06	30.99	23.33	25.1	21.47	41.43	40.01	35.7	32.64	26.51	27.62	20.53	12.66
Gns	3	211.23	237.03	210.04	218.19	95.1	96.71	97.35	110.35	142.99	165.4	177.88	143.4	111.42	129.06	111	85.98
Golm1	3	26.15	29.13	22.39	24.71	4.96	4.56	4.58	7.24	5.42	4.61	6.05	4.38	3.05	2.42	4.93	5.6
Gpr137b	3	203.92	202.68	196.45	195.2	101.14	109.15	97.04	97.32	142.78	137.72	137.9	118.15	78.27	77.52	77.17	72.42
Gpr183	3	128.09	122.04	140.01	109.89	80.85	89.33	86.87	66.65	172.68	142.87	175.51	136.79	84.56	71.25	58.64	46.93
Gpr34	3	307.81	281.29	301.53	251.88	109.93	102.03	107.98	58.95	188.12	172.88	185.76	158.18	101.59	102.02	78.92	30.86
Gpt2	3	6.17	5.6	6.79	8.05	2.84	1.48	2.8	2.52	6.4	5.59	5.59	7.05	3.47	3.39	2.9	1.97
Gramd3	3	22.49	21.87	21.96	19.57	9.84	14.66	8.19	8.57	26.03	25.48	22.24	20.21	15.29	14.1	10.7	9.4
Grn	3	702.64	805.65	718.11	698.15	327.69	343.47	345.04	268.43	532.67	513.12	494.23	410.85	339.77	445.94	324.01	175.25
Gtf2h2	3	4.63	3.96	3.76	4.66	2.76	2.14	1.96	1.98	1.83	1.44	1.69	2.06	1.66	1.05	1.66	1.33
Gyg	3	17.51	16.16	14.78	18.04	7.44	6.66	7.83	6.67	11.31	10.66	10.36	11.77	7.33	8.19	7.8	7.15
Gypc	3	35.26	36.09	34.24	32.05	9.23	10.44	7.6	6.22	47.07	43.75	44.04	37.92	16.73	21.21	12.28	5.74
Havcr2	3	61.52	63.64	49.61	57.17	15.17	15.05	11.85	17.22	11	8.26	11.26	8.26	3.59	3.4	4.57	6.54
Hes1	3	12.98	9.8	7.93	10.07	1.01	3.08	1.74	2.46	2.79	2.58	3.03	2.85	1.37	2.21	1.9	1.65
Hexb	3	1283.43	1386.16	1158.86	1076.95	309.1	311.36	259.98	225.32	238.16	253.96	226.82	199.67	109.85	105.04	110.2	126.19
Hgf	3	2.13	1.55	1.97	2.46	0.95	1	0.69	1.09	0.93	0.92	0.87	0.89	0.42	0.3	0.66	0.38
Hgsnat	3	151.49	147.34	166.77	166.58	75.6	54.24	69.45	58.47	173.18	135.81	172.87	182.82	73.59	71.66	60.6	42.69
Hpgd	3	405.51	449.44	433.9	347.28	258.88	326.98	269.82	163.79	313.44	332.15	292.68	226.54	226.82	266.94	184.2	107.52
Hpgds	3	57.15	53.81	57.82	52.35	23.57	18.66	21.95	11.98	44.08	39.63	40.55	34.89	16.22	13.42	10.66	3.74
Hpse	3	29.01	29.57	25.56	27.14	13.95	9.62	8.9	10.09	22.97	16.83	18.9	15.91	11.59	14.41	9.74	6.52
Htra3	3	13.46	13.99	11.26	12.03	3.12	3.72	3.08	4.73	0.58	1.3	1.05	2.14	0.46	0.95	1.56	1.99
Hvcn1	3	5.43	6.73	4.55	4.51	4.2	2.71	1.94	2.4	2.1	2.19	1.67	2.04	1.27	1.66	1.49	0.57
Hyal2	3	7.58	8.66	8.7	7.97	4.87	3.72	5.91	3.94	9.94	10.24	9.72	11.06	5.87	6.5	4.53	2.68
Ifitm10	3	1.36	1.36	1.16	1.29	0.17	0.19	0.1	0.05	0.27	0.17	0.13	0.18	0.07	0.18	0.11	0.01
Il17ra	3	16.48	16.01	12.85	16.18	8.15	10.06	6.72	11.47	5.71	7.16	5.31	6.93	6.57	7.88	7.67	8.24
Il21r	3	13.5	14.18	9.69	10.65	3.01	3.41	2.84	2.75	2.54	2.64	2.56	1.84	1.18	0.87	0.77	1.12
Inpp5d	3	17.25	16.87	14.88	17.6	9.07	8.74	6.84	12.15	8.71	10.25	11.36	9.93	5.92	7.27	7.38	8.43
Ip6k3	3	24.76	26.75	16.5	18.12	4.42	3.87	3.34	3.05	10.42	8.09	6.5	5.43	3.31	7.59	3.41	1.99
Irf2bpl	3	17.05	15.85	17.55	16.81	6.2	5.49	6.43	11.19	10.12	13.11	15.57	11.68	8.5	11.16	11.02	10.06
Itga6	3	5.2	5.13	5.5	6.36	5.28	3.14	2.63	4.53	1.66	1.67	1.94	2.01	0.66	0.57	0.72	0.66
Itgav	3	14.12	11.05	12.28	16.51	5.25	5.03	3.56	5.69	3.21	4.01	5.04	3.66	2.33	2.04	2.78	4.38
Itgb5	3	52.75	103.51	69.73	100.81	21.62	27.01	19.08	22.99	14.6	13.74	14.46	11.75	6.72	6.13	5.98	2.58
Kank2	3	8.16	6.89	6.99	6.76	1.49	1.32	1.3	0.96	9.85	6.8	6.11	5.25	2.41	2.89	1.29	0.75
Kdelc2	3	30.44	32.95	32.75	33.25	11.97	6.72	11.46	9.42	30.69	27.11	33.48	26.76	14.51	15.34	11.42	5.71
Kif13b	3	4.83	3.62	3.42	5.21	1.52	0.98	0.8	2.47	2.46	3.87	2.38	2.84	2.5	2.58	1.53	1.66
Kif3c	3	2.59	3.26	3.78	3.27	0.97	0.92	1.21	1.22	4.13	4.56	6.76	3.85	1.13	1.53	1.31	0.76
Kifc3	3	3.71	4.63	3.56	4.25	1.27	0.88	1.21	2.14	2.46	4.05	4.34	2.81	1.95	1.95	2.48	2.05
Klc4	3	43.25	57.64	40.1	42.65	22.2	26.35	17.76	20.75	34.85	37.45	33.79	26.34	14.78	21.85	22.65	17.97
Klf9	3	31.59	32.01	37.65	31.93	18.81	17.98	24.01	17.92	40.37	43.25	39.08	40.17	20.78	29.23	28.73	21.32
Klhl21	3	15.24	19.03	16.1	18.82	3.32	5.37	5.77	9.3	9.21	13.98	17.79	12.05	9.06	7.23	9.68	8.45
Klhl6	3	56.49	56.57	44.2	47.36	22.24	21.2	20.51	19.61	27.24	22.07	25.07	22.75	19.23	16.26	17.61	18.06
Lair1	3	26.76	26	22.56	22.99	10.27	10.99	9.68	7.1	10.32	12.05	11.14	9.67	4.1	4.28	4.55	2.07
Lamb2	3	5.73	7.89	5.73	7.98	1.11	0.79	0.92	3.53	2.57	8.58	5.94	6.05	1.67	2.45	2.23	1.84
Laptm4b	3	11.64	12.21	10.33	12.28	2.55	5.74	6.69	4.3	7.27	5.94	6.55	8.65	3.69	6.97	3.69	2.18
Layn	3	6.53	4.92	5.02	4.79	1.43	1.88	1.35	1.42	3.91	3.9	3.58	4.06	1.95	1.67	0.91	0.5
Ldhb	3	7.76	7.61	6.22	5.78	2.97	4.49	3.18	1.94	0.57	0.43	0.36	1.15	0.53	0.73	1.31	0.71
Lefty1	3	4.46	3.89	3.47	4.06	2.02	0.42	0.81	0.62	3.83	3.08	3.02	3.42	1.49	0.72	1.23	0.52
Lgals9	3	95.29	92.64	84.24	83.76	65.18	54.25	54.06	41.87	53.44	46.49	51.01	50.54	45.68	54.43	41.82	30.43
Lgalsl	3	1.28	1.47	1.86	2.02	0.2	0.3	0.5	0.41	1.07	1.93	2.02	1.87	0.37	0.39	0.8	0.66
Lhfpl2	3	21.04	23.53	18.94	20.11	5.68	5.31	5.83	5.69	3.5	3.04	3.43	3.01	2.37	1.64	2.55	1.46
Lpar6	3	8.51	6.73	6.04	6.24	7.75	8.07	6.01	7.05	3.29	3.12	2.24	2.57	3.75	3.62	2.62	3.64
Lpcat2	3	40.62	41.88	34.71	32.29	24.86	24.64	20	16.91	9.47	8.18	9.95	9.09	5.82	4.61	6.38	7.1
Lrp1	3	42.29	40.82	40.57	49.89	21.02	22.01	16.97	26.92	20.5	28.53	23.4	19.99	16.22	19.05	18.5	25.84
Lrrc34	3	26.81	20.08	18.68	18.08	1.45	0.83	1.69	1.14	8.38	9.93	8.39	8.04	0.5	1.49	0.68	0.49
Lrrc75a	3	10.84	15.23	11.18	10.92	5.85	4.55	3.63	5.24	6.02	7.42	8.98	7.22	1.92	2.65	3.13	1.69
Ltc4s	3	107.02	102.67	92.85	78.45	25.88	29.67	21.33	10.14	58.62	56.85	47.83	57.4	32.16	41.52	25.02	7.66
Lyve1	3	455.14	515.99	416.95	456.03	75.28	83.03	78.59	73.37	673	561.35	570.7	572.22	158.48	228.01	128	56.13
Lzts2	3	4.66	5.28	4.57	4.51	2.03	1.3	1.43	1.57	5.11	5.88	5.95	5.5	1.37	1	1.26	0.66
Maoa	3	10.54	10.95	11.35	11.59	4.24	5.48	4.78	4.03	18.71	16.31	16.86	14.62	8.87	9.11	6.07	2.59
Mapk11	3	4.27	4.6	2.29	3.87	0.54	0.48	0.78	0.46	2.99	4.07	2.64	3.24	1	1.02	0.35	0.75
Mcts2	3	4.63	4.67	5.22	4.54	2.28	0.72	2.71	2.84	5.34	5.15	3.75	6.23	1.96	3.08	0.47	1.63
Med22	3	11.38	14.76	11.52	12.55	4.47	3.21	4.86	6.74	10.34	11.88	12.16	8.69	5.17	3.62	5.14	6.68
Mef2a	3	25.69	22.1	22.28	24.64	10.83	10.1	10.9	12.81	15.5	15.48	16.25	12.88	8.76	7.34	7.53	7.91
Meis3	3	2.17	2.39	1.87	1.58	0.31	0.36	0.36	0.27	1.39	1.3	0.84	1.04	0.47	0.77	0.48	0.25
Mertk	3	23.7	24.07	23.33	26.49	13.82	11.31	10.75	12.21	22.51	22.52	22.81	17.5	13.37	15.4	12.03	5.38
Mfge8	3	7.28	9.69	6.98	8.49	3.83	5.11	3.51	3.79	3.48	4.57	5.26	4.71	3.32	3.38	3.01	2.57
Mfng	3	5.48	7.86	5.4	5.71	4.03	3.82	3.48	3.39	1.26	2.01	1.75	1.69	1.64	1.25	1.35	3.12
Mfsd6	3	8.47	9.79	8.51	9.41	2.57	2.39	2.4	3.67	8	8.75	9.05	6.28	3.52	3.67	2.61	2.66
Mgst1	3	16.78	11.81	14.53	13.81	9.09	8.96	8.03	5.18	6.34	6.37	6.19	13.76	8.63	4.97	6.26	2.47
Mill2	3	2.69	2.57	2.34	2.34	0.71	0.82	0.64	0.52	3.31	3.67	2.71	2.04	0.99	2.34	0.86	0.24
Mmp14	3	9.83	8.37	8.43	10	8.66	8.82	9.41	9.9	2.16	2.31	2.83	3.02	3.38	3.76	4.54	3.26
Mmp2	3	15.29	19.46	11.41	17.99	3.11	3.07	5.37	7.14	1.62	3.91	2.29	5.38	5.26	6.15	4.83	5.32
Mob2	3	8.83	9.77	8.08	7.5	4.77	3.78	4.29	3.44	6.07	5.48	5.21	5.94	4.58	3.21	3.23	3.09
Mocos	3	6.1	6.62	5.61	5.69	2.63	2.55	2.26	2.52	6.6	7.01	5.66	6.07	2.53	2.39	1.64	1.32
Mpzl1	3	1.45	1.75	1.62	1.56	0.55	0.24	0.35	0.47	2.12	2.19	2.33	2.1	0.41	0.05	0.26	0.5
Mr1	3	3.64	3.53	3.2	3.69	1.09	1.29	1.15	1.15	2.2	1.7	2.18	1.9	1.49	1.37	1.15	0.83
Mrgpre	3	3.29	4.49	2.45	3.26	0.94	0.03	0.76	0.33	0.76	0.19	0.41	0.61	0.31	0.87	0.76	0.21
Ms4a14	3	11.04	9.23	10.09	11.46	9.95	8.85	5.34	6.33	11.8	10.13	9.56	9.36	5.6	5.42	4.57	1.64
Msrb2	3	19.57	20.32	18.28	16.97	5.08	4.98	5.96	2.69	12.81	11.02	8.83	8.89	5.08	8.73	3.92	1.37
Mtus1	3	12.68	11.46	9.71	11.83	2.29	1.22	1.32	1.33	2.67	3.15	2.77	2.86	1.06	1.06	0.67	0.36
Mxra8	3	10.96	12.16	9.03	9.14	1.12	1.04	1.07	1.56	6.35	5.23	6.49	5.75	0.76	0.99	1	0.77
Myo1e	3	24.25	25.11	20.3	18.58	4.79	5.01	4.58	6.95	9.17	11.19	15.49	7.53	3.53	3.82	7.2	5.88
Myo1f	3	52.27	54.83	42.81	46.7	29.97	25.64	25.93	36.19	22.3	24.64	25.56	22.65	24.37	21.21	28.35	33.12
Myo7a	3	4.54	4.86	4.12	4.6	1.91	1.67	1.2	1.99	2.61	4.49	4.59	2.68	1.94	2.34	2.25	1.58
Nacc2	3	5.43	6.16	6.11	5.67	2.12	1.55	2.05	2.12	5.66	5.71	5.64	4.26	2.61	3.04	2.82	2.05
Naglu	3	55.39	61.85	55.4	55.09	20.04	19.77	20.8	23.03	24.78	26.28	27.77	29.57	27.15	20.78	22.92	17.26
Ncf1	3	52.08	55.92	45.85	48.79	26.34	23.98	27.2	24.82	37.2	36.53	36.18	35.08	20.86	18.72	26.12	24.15
Nck2	3	1.9	2.57	2.27	1.94	0.37	0.3	0.57	0.61	1.9	2.1	2.71	2.03	0.39	0.14	0.38	0.67
Nedd9	3	24.54	21.17	18.34	23.59	8.23	7.53	8.35	10.63	9.3	11.59	9.47	9.5	9.21	8.94	8.1	10.11
Nek6	3	12.22	11.65	10.84	10.27	7.54	5.49	5.92	4.92	7.03	5.62	6.67	5.98	5.7	4.83	5.36	3.6
Neo1	3	1.96	2.11	2.21	2.96	0.08	0.03	0.11	0.14	1.01	1.7	1.8	1.48	0.14	0.08	0.05	0.07
Nfic	3	18.9	17.18	16.52	16.79	5.73	6.69	6.04	6.04	8.81	10.13	10.48	9.44	5.55	7.21	5.93	3.95
Nid2	3	31.89	40.42	29.73	34.65	8.81	9.89	8.62	16.55	16.68	27.68	30.48	24.25	15.97	14.02	11.97	11.06
Ninl	3	2.12	2.2	1.8	2.02	0.12	0.1	0.12	0.19	0.98	1.02	1	0.39	0.36	0.22	0.18	0.02
Nlrc3	3	6.44	6.36	5.43	5.14	1.11	0.91	0.62	0.66	1.89	2.22	2.73	1.96	0.56	0.19	0.47	0.27
NoGeneName	3	3.82	3.57	3.79	3.34	0.48	0.87	0.86	0.48	0.62	0.29	0.27	0.44	0.64	0.41	1.38	0.35
NoGeneName	3	11.21	6.84	10.18	9.75	4.13	1.57	4.11	2.47	6.38	7.53	6.9	8.05	4.42	4.37	4.38	2.25
NoGeneName	3	7.8	8.61	7.02	7.71	8.11	8.44	7.3	6.56	2.49	2.38	2.63	3.22	4.15	4.89	3.78	5.56
NoGeneName	3	1.86	2.26	2.28	2.65	1.24	1.32	1.88	1.14	0.3	0.45	0.82	0.51	0.56	1.13	1.51	1.27
NoGeneName	3	3.66	2.14	1.99	2.92	3.46	0.9	1.07	1.14	0.84	0.64	0.94	0.58	1.18	1.91	1.66	1.09
Nr1d1	3	63.17	64.17	65.03	59.7	35.53	35.01	31.24	27.19	69.51	73.81	80.28	57.49	32.01	34.94	32.41	20.19
Nr1h3	3	2.31	2.29	2.37	1.98	1.81	1.17	0.84	1.13	0.68	0.72	0.65	0.7	0.88	0.54	0.59	0.38
Nradd	3	8.24	7.02	7.67	8.6	2.66	2.04	2.26	2.05	8.11	5.69	7.33	6.72	3.13	3.23	3.22	1.02
Ntpcr	3	18.42	16.73	15.47	16.25	10.79	10.74	10.74	8.35	10.38	9.7	8.16	8.46	10.4	8.87	7.32	4.78
Nupr1	3	57.86	49.72	42.4	43.11	24.78	25.59	21.55	16.55	41.77	41.64	38.01	41.84	27.24	31.88	23.2	12.19
Olfml3	3	77.39	81.7	64.34	66.03	7.91	9.18	6.69	4.59	5.45	5.88	5.93	4.84	0.69	1.29	0.94	0.77
Olr1	3	19.37	15.22	11.11	17.21	7.57	4.81	7.52	7.48	0.42	0.36	0.58	1.47	3.21	2.27	11.88	8.19
Ophn1	3	11.5	10.27	9.3	9.49	4.04	3.61	3.68	3.22	6.48	5.61	6.09	4.92	4.02	4.17	3.63	1.58
Optn	3	5.63	5.48	5.01	5.4	2.19	3.29	1.7	1.87	5.8	5.65	4.94	5.43	2.39	2.41	1.8	1.16
P2rx7	3	15.36	15.78	14.56	16.1	6.76	6.39	6.25	7.12	13.53	14.41	14.7	11.82	7.9	6.92	6.25	3.22
P2ry12	3	49.06	45.29	42.31	41.5	18.8	20.58	19.95	14.52	44.56	37.73	37.63	36.15	24.39	24.43	15.35	7.9
P2ry13	3	112.12	115.28	97.39	91.77	27.9	31.57	21.8	18.61	95.88	74.99	69.15	60.4	30.34	34.33	20.3	7
Pacs1	3	25.1	25.4	23.43	24.91	8.53	8.17	6.86	14.18	11.56	15.38	17.86	14.79	7.42	9.69	9.85	12.13
Pald1	3	60.42	71.54	51.04	52.22	3.4	5.19	4.63	7.43	10.03	14.26	14.57	10.3	1.29	0.93	3.21	1.67
Palm	3	3.99	3.4	3.13	3.22	2.23	0.69	1.24	1.86	0.66	1.19	1.42	2.63	1.02	1.2	1.22	1.29
Pbxip1	3	30.01	28.89	25.96	27.64	11.07	9.71	9.16	10.87	8.27	8.16	8.64	7.53	7.39	5.88	7.81	12.89
Pde3b	3	12.66	14.99	14.32	18.42	4.14	5.41	5.27	8.16	6.06	8.49	8.74	7.34	5.03	5.26	5.92	8.41
Pdgfb	3	10.47	12.34	12.77	10.16	6.28	6.97	7.19	8.9	4.26	5.89	5.82	4.92	3.16	3.41	5.39	6.74
Pdgfc	3	16.93	15.31	16.08	15.53	4.38	4.28	5.67	3.19	11.43	10.54	11.02	9.87	7.47	5.61	5.59	1.98
Pdlim7	3	5.72	5.73	4.22	4.43	1.08	0.95	0.84	1.29	0.83	1.65	1.8	1.9	0.32	0.38	0.66	0.63
Pdpn	3	12.56	10.46	10.08	14.02	7	4.38	6.02	7.56	0.57	1.41	3.14	2.88	2.88	1.45	7.04	4.19
Phlda3	3	8.05	7.74	7.17	6.73	3	1.83	2.54	1.81	2.96	3.93	4.15	4.91	2.22	2.37	2.71	2.64
Phtf2	3	10.84	10.22	10.38	10.19	2.44	2.83	3.26	3.31	5.01	5.57	5.59	4.46	2.99	2.93	3.48	2.8
Pik3r2	3	13.03	12.44	10.79	12.58	5.37	3.76	4.75	7.28	9.43	7.38	9.72	6.61	5	4.9	7.77	8.43
Pik3r5	3	33.71	38.21	28.64	34.06	13.77	14.53	14.33	26.07	13.19	16.13	18.42	13.27	8.65	10.52	15.81	24.65
Pla2g15	3	56.33	57.86	55.08	51.9	34.28	38.49	35.43	28.96	43.93	38.95	36.38	31.61	31.37	34.58	26.52	11.15
Pla2g16	3	9.86	8.91	8.32	8.54	2.71	2.68	2.31	1.5	4.99	4.13	3.75	4.14	3.5	3.9	2.93	1.85
Plcb3	3	18.94	25.03	19.13	20.77	7.69	11.44	7.51	14.14	18.37	26.27	26.45	18.43	11.63	14.47	10.17	9.58
Plcd1	3	3.82	4.1	3.11	2.88	0.82	0.43	0.83	0.84	2.41	2.71	2.84	1.88	0.93	1.54	1.01	0.88
Plekhb2	3	46.11	51.96	46.47	45.81	18.03	21.07	19.9	27.95	43.78	44.15	51.86	36.83	25.62	24.68	28.91	27.26
Plekhg5	3	5.33	5.77	4.83	5.13	1.24	1.72	1.85	1.76	5.15	7.75	7.08	5.24	3.32	4.07	2.92	1.41
Plekhh3	3	2.51	3.41	1.83	2.2	0.87	0.37	0.59	0.51	1.18	1.76	1.36	1.33	0.64	0.59	0.52	0.38
Plekhm1	3	13.4	11.52	10.76	12.9	4.85	3.54	4.75	4.48	6.65	8.35	8.35	8.9	3.98	4.39	4.69	3.52
Plod1	3	42.9	46.58	43.36	43.19	19.53	18.56	18.19	18.26	30.53	28.38	32.47	29.88	21.92	19.61	18.71	9.7
Plpp1	3	16.25	14.78	16.54	17.42	5.19	5.55	5.23	6.73	16.41	17.66	16.89	18.54	6.33	8.72	6.89	5.72
Pls3	3	15.41	14.36	13.66	14.94	1.91	1.23	2.47	2.58	11.69	11.37	11.62	10.59	2.84	2.99	1.94	1.98
Plscr4	3	6.91	5.5	6.04	7.91	2.31	3.78	3.09	2.74	3.52	4.02	3.29	2.86	2.61	4.4	2.16	1.89
Plxdc1	3	7.31	6.44	6.83	5.97	0.71	0.68	0.56	1.05	0.44	0.46	1.02	1	0.6	0.12	0.07	1.73
Plxna4	3	1.86	2.7	1.75	2.48	0.24	0.39	0.35	0.37	0.72	0.62	0.38	0.3	0.52	0.39	0.56	0.43
Plxnb2	3	28.13	28.15	24.73	32.32	12.74	10.8	10.26	20.55	12.4	22.3	22.93	17	10.8	14.65	14.29	18.69
Pmepa1	3	24.27	20.32	19.67	26.61	2.99	3.47	2.04	1.68	4.71	2.61	2.39	2.12	0.67	0.66	0.66	0.41
Pmp22	3	354.91	325.25	328.88	337	158.63	178.54	175.59	118.71	366.32	361.68	352.63	338.4	228.38	276.18	199.41	89.89
Pnpla7	3	8.07	7.44	7.11	7.29	3.33	3.01	3.19	3.73	5.24	5.62	5.98	5.46	2.83	2.91	2.81	2.31
Pomk	3	24.07	27.5	28.27	22.42	8.98	8.47	8.79	6.31	29.71	31.04	29.49	27.16	8.03	12.6	7.63	3.25
Ppargc1b	3	2.14	2.09	2.11	1.92	0.44	0.48	0.81	0.65	1.57	2.5	3.22	2.35	1.02	1.12	0.74	0.5
Ppm1f	3	3.35	4.97	3.07	4.21	0.93	3.09	0.86	1.84	2.55	3.87	3.44	3.61	1.39	0.97	1.49	1.1
Ppp1r3b	3	2.69	3.04	2.21	2.56	0.84	0.8	0.81	0.85	1.54	1.59	1.5	1.54	0.76	0.65	0.5	0.48
Pqlc2	3	9.98	11.56	11.01	9.7	4.96	6.46	4.98	3.38	5.5	5.59	5.53	5.34	4.69	5.03	3.85	2.63
Prkcb	3	10.02	14.27	12.21	10.73	6.51	7.46	7.03	5.13	11.15	12.56	10.5	9.91	5.91	7.46	3.36	1.86
Prkcdbp	3	10.22	10.03	8.64	10.69	4.33	2.53	4.92	5.46	8.91	7.94	7.81	9.95	4.33	6.73	3.18	3.87
Prnp	3	24.81	18.18	24.27	26.1	7.48	6.98	8	9.28	27.96	19.7	23.81	26.33	8.04	7.58	6.74	6.71
Pros1	3	151.8	143.16	156.56	144.64	69.6	78.42	85.27	71.98	185.83	186.64	205.28	180.1	122.96	115.34	105.59	89.54
Prune2	3	13.22	12.74	13.3	15.26	5.61	4.44	5.1	4.86	8.95	12.21	10.4	10.06	6.16	7.04	4.03	2.32
Ptprm	3	3.29	4.24	3.17	3.52	0.05	0	0.17	0.41	1.74	2.5	2.61	2.23	0.42	0.08	0.08	0.14
Pwwp2b	3	3.6	3.98	3.75	3.32	2.12	2.22	1.98	1.55	1.68	2.02	2.16	1.78	1.82	0.98	1.43	0.89
Pxdc1	3	10.02	12.41	10.87	13.02	4.07	6.38	4.11	9.43	9.3	11.45	9.38	8.27	2.45	2.54	1.87	7.76
Pyroxd2	3	13.3	15.29	11.18	14.19	3.48	2.4	2.36	2.22	6.91	9.51	8.79	6.94	3.63	4.93	1.7	1.36
Rab31	3	373.31	415.73	357.34	363.8	139.46	122.02	145.57	140.73	287.56	264.31	291.02	248.3	159.75	167.35	157.57	113.37
Rab32	3	148.73	127.43	134.25	135.35	61.26	53.93	70.01	57.53	74.12	60.1	65.13	65.06	57.25	60.46	60.41	61.73
Rab34	3	4.72	4.29	4.24	3.69	1.37	1.33	1.42	1.2	4.08	3.35	3.09	3.08	1.15	1.04	1.32	0.58
Raet1d	3	15.7	11.29	13.15	12.91	3.01	2.68	3.87	2.98	7.4	5.98	6.79	7.85	2.4	1.97	2.6	2.3
Rai14	3	6.31	5.85	5.76	6.49	2.17	2.15	1.31	1.9	2.08	3.8	3.53	2.14	1.29	1.59	2.18	1.35
Rapgef5	3	3.41	2.9	2.43	2.67	0.39	0.1	0.62	0.48	1	1.22	1.39	0.37	0.56	0	0.22	0.03
Rasa1	3	16.5	16.29	18.95	17.32	8.81	9.52	10.56	8.25	17.8	20.2	25.88	19.65	11.15	10.68	12.95	7.5
Rasgrp3	3	35.06	35.83	31.63	30.88	10.96	9.17	8.04	6.26	24.22	21.09	21.41	15.15	13.13	13.12	7.6	2.85
Rbbp9	3	12.48	9.67	11.61	11.93	5.33	5.75	7.32	4.54	14.44	11.71	11.34	13.01	10.31	9.32	5.92	3.89
Rcan1	3	33.57	38.48	41.16	45.46	18.92	19.39	27.11	19.05	41.81	47.72	51.39	43.29	18.58	23.32	19.5	9.39
Rcan3	3	8.35	9.99	6.43	9.36	2.16	3.33	3.2	6.36	6.53	8.46	6.62	6.01	3.95	4.21	4.16	4.84
Rftn1	3	41.98	47.24	37.36	35.67	19.58	18.44	16.77	19.46	18.29	17.24	18.1	14.8	12.63	14.14	12.68	16.15
Rgmb	3	14.42	17.06	15.41	16.66	6.81	7.53	6.44	7.53	12.9	17.3	17.16	13.25	8.21	9.27	5.37	4.24
Rgs1	3	18.51	10.42	11.92	15.75	11.44	7.93	10.98	7.31	7.2	5.09	6.52	5	9.71	5.93	14.64	11.02
Rgs7bp	3	7.24	7.15	7.12	6.08	1.08	1.46	0.94	0.72	5.79	6.48	6.63	6.45	1.93	1.71	1.23	0.45
Rhoj	3	4.22	3.69	4.4	4.49	1.53	0.89	0.97	1.24	6.18	5.7	6.84	5.97	1.65	1.61	1.14	0.94
Rhoq	3	17.77	19.28	19.47	26.13	7.02	9.37	9.11	8.86	9.78	11.27	12.48	11.68	8.49	12.15	6.06	5.95
Rilpl1	3	4.91	6.48	5.32	5.07	1.54	2.94	1.51	1.47	2.37	3.5	3.18	3.06	1.25	1.02	0.99	0.53
Rin2	3	65.63	61.01	59.42	57.29	26.87	25.06	24.93	19.76	55.57	51.82	55.28	45.62	35.75	33.52	25.36	14.25
Rnase4	3	445.71	406.16	406.47	391.04	205.05	206.83	195.38	121.15	336.43	317.52	284.64	284.06	209.84	247.4	157.04	60.08
Rnf128	3	5.82	5.14	5.67	5.76	2.17	2.2	4.31	1.73	3.38	2.32	2.64	3.07	1.88	1.09	2.85	0.56
Rnf180	3	40.36	36.78	31.73	37.31	22.64	20.06	17.63	16	25.32	23.97	26.46	20.47	17.05	15.63	11.08	5.72
Rprd1a	3	5.5	5.17	4.69	5.76	2.77	1.96	1.85	1.95	3.95	4.4	3.8	3.93	1.65	2.87	2.93	3.59
Rps4l	3	19.33	25.87	22.83	22.29	8.54	7.73	14.03	9.1	25	26.72	29.54	32.15	11.56	13.96	15.1	8.03
Rtn4rl1	3	12.15	12.05	11.19	10.05	1.19	2.31	1.35	1.58	7.02	6.94	6.08	5.31	2.8	3.3	1.18	0.78
Rubcn	3	1.48	1.69	1.62	2.07	0.64	0.75	0.57	0.93	1.81	2.89	3.14	2.2	1.05	1.22	1	0.69
S100b	3	129.95	126.16	107.45	119.17	9.26	5.84	5.27	3.13	1.92	1.39	2.54	0.98	0.71	0.46	0.29	0.15
S1pr1	3	140.64	119.85	120.11	126.82	25.09	29.44	33.51	26.16	98.7	87.13	89.42	83.26	47.86	46.3	31.72	16.64
Sccpdh	3	5.81	5.54	5.67	5.36	1.38	2.1	1.6	1.5	5.1	5.03	5.49	5.54	2.37	2.2	1.65	1.4
Scd2	3	7.12	9.72	8.74	10.34	3.67	3.83	4.63	9.79	1.53	1.58	1.97	2.1	1.46	2.05	5.11	7.63
Scml4	3	9.67	9.95	8.42	6.96	0.98	0.81	0.92	0.78	1.4	1.67	1.11	1.2	0.63	0.85	1.12	1.26
Scn1b	3	5.3	8.18	8.23	7.92	0.79	0.76	1.52	1.27	1.91	2.22	3.14	3.15	1.36	1.95	1.64	1.35
Scoc	3	19.2	15.22	18.86	17.67	4.99	4.27	4.74	3.05	7.61	6.12	6.58	6.81	3.11	3.25	2.86	2.82
Sec14l1	3	18.47	21.22	18.11	19.59	7.61	8.21	7.08	9.46	12.6	16.86	18.11	14.58	8.86	11.29	9.36	7.24
Selm	3	15.64	13.31	13.36	12.54	5.51	8.27	7.06	5.92	15.56	10.09	12.45	16.41	6.85	7.8	6.11	4.3
Sephs2	3	20.56	19.52	19.11	17.11	14.54	10.67	10.29	13.54	12.14	10.96	10.04	14.13	12.31	8.15	7.48	7.66
Serpinb6a	3	36.86	32.94	37.4	36.29	13.58	10.61	13.34	7.83	31.87	31.53	31.32	32.91	20.38	18.35	16.03	7.33
Serpine1	3	1.86	1.26	1.21	1.56	0.13	0.45	0.31	0.41	0.11	0.09	0.32	0.12	0.02	0.1	0.27	0.15
Serpinh1	3	4.82	5.01	5.12	5.36	0.35	0.86	0.94	1.93	1.19	2.33	3.3	3.65	1.1	1.24	1.1	1.2
Sesn1	3	54.06	51.27	52.84	44.01	23.31	25.05	25.99	16.05	52.71	48.44	53.87	39.23	35.43	30.86	22.52	8.79
Sgcb	3	37.14	35.91	35.81	37.93	10.84	7.51	8.51	9.79	25.08	24.17	23.38	22.89	10.85	13.19	9.96	7.74
Sgk1	3	21.03	17.06	15.81	17.45	8.39	8.22	9.87	9.75	3.96	3.82	4.41	5.36	5.57	3.73	6.77	8.38
Sh3bgrl2	3	4.6	5.19	5.03	5.27	0.58	1.32	0.27	0.46	3.1	2.75	3.66	2.29	0.37	0.28	0.32	0.17
Sh3bp5	3	89.6	92.81	90.04	80.62	23.9	26.59	25.14	25.35	50.46	53.16	63.02	49.98	18.85	15.55	21.95	16.36
Ski	3	8.89	7.96	8.41	7.62	3.82	3.68	3.46	3.3	4.71	5.85	4.19	5.01	3.24	3.89	3.14	3.06
Skil	3	15.21	13.82	13.87	14.97	12.06	11.23	10.73	15.01	5.26	7.29	7.7	5.85	6.43	6.14	6.72	12.9
Sla	3	12.63	12.47	9.98	11.17	6.72	7.31	7.66	8.46	5.36	4.88	4.94	5.1	5.77	5.6	5.04	6.14
Slc12a7	3	30.63	32.72	30.57	37.5	13.36	12.59	14.81	22.82	33.12	42.68	45.73	40.8	27.92	29.11	22.03	11.45
Slc17a5	3	27.46	26.41	27.08	27.11	9.96	9.36	9.84	7.43	18.72	16.49	18.16	15.84	11.38	10.32	8.69	5.03
Slc18b1	3	3.53	3.47	3.78	3.36	1.21	1.13	1.35	0.69	2.59	3.72	3.65	3.92	2.13	1.69	0.96	0.55
Slc27a1	3	18.01	19.5	20.63	18.87	7.39	4.45	8.25	7.1	10.37	7.73	12.07	8.67	6.62	4.98	6.99	4.05
Slc2a6	3	24.74	29.78	21.88	21.65	5.66	5.49	7.22	10.18	2.09	2.82	2.9	2.2	2.39	2.44	9.43	14.84
Slc35e3	3	14.87	14.17	14.27	13.87	3.98	6.03	6.09	7.81	13.88	13.78	12.53	11.17	11.14	6.23	5.87	4.75
Slc46a1	3	7.55	10.46	8.02	7.66	2.64	1.87	1.12	0.99	2.65	1.57	2.58	1.89	1.6	2.16	1.1	0.53
Slc6a6	3	104.95	108.48	103.52	108.43	42.22	43.19	45.56	44.18	77.88	79.21	70.12	65.9	43.58	50.89	49.98	45.02
Slc9a3r2	3	64.28	74.2	51.27	45.95	5.53	5.42	4.36	3.66	35.96	37.46	36.02	29.42	10.66	13.54	10.21	4.29
Slco2b1	3	38.78	41.92	35.63	39.78	10.41	9.74	10.13	11.92	22.59	27.03	25.01	21.64	15	16.43	10.68	5.83
Slmo1	3	11.31	11.22	9.36	10.35	3.74	0.97	2.46	2.41	6.21	5.65	6.81	7.74	1.86	2.29	1.25	1.64
Smagp	3	29.86	28.06	31.06	31.52	17.27	16.44	18.54	11.64	35.71	35.8	31.96	30.28	21.35	30.04	18.38	6.01
Smpdl3a	3	90.83	82.82	85.5	94.78	46.98	43.47	44.5	35.4	61.85	61.36	61.52	56.48	50.38	43.41	44.46	33.31
Snta1	3	9.46	11.55	11.03	10.37	2.55	2.01	3.5	3.4	5.48	5.64	8.81	7.54	4	4.56	3.74	2.87
Snx32	3	10.07	11.44	10.29	9.73	3.96	5.17	6.68	3.57	6.98	10.13	8	7.74	5.07	3.7	2.34	3.76
Sorbs3	3	78.62	76.8	69.35	70.36	28.65	25.54	21.92	18.75	70.86	70.83	71.49	62.67	35.34	43.89	27.86	11.24
Sox4	3	16.39	18.3	18.49	14.95	2.46	1.62	0.99	1.63	1.19	1.34	1.27	1.19	0.38	0.52	0.51	0.41
Sparc	3	157.22	155.73	118.2	143.4	18.23	22.54	29.37	38.47	14.2	18.76	16.95	34.05	22.45	38.23	27.82	29.6
Spats2	3	10.64	11.37	10.97	11	4.7	3.43	3.06	3.14	8.07	9.13	10.5	9.72	4.04	2.25	3.12	1.24
Spire1	3	8.04	11.24	8.8	13.74	1.82	3.7	2.99	3.88	5.98	5.87	6.32	5.43	3.07	2.06	3.44	3.21
Spns2	3	1.08	1.84	1.16	2.2	0.3	0.19	0.19	0.66	0.43	0.49	0.47	0.41	0.22	0.36	0.3	0.14
Spp1	3	30.25	33.73	49.14	35.31	16.18	18.29	24.13	17.44	2.5	4.8	4.73	5.29	9.37	3.01	9.16	9.21
Spsb1	3	3.08	2.15	2.47	3.06	0.81	0.19	0.17	0.64	0.22	0.3	0.18	0.24	0.21	0.3	0.22	0.31
Srgn	3	242.57	183.04	210.71	228.78	130.06	122.51	137.35	148.11	59.77	56.64	58.63	78.34	93.72	89.85	132.16	212.56
St3gal2	3	4.76	6.89	5.33	4.8	1.39	1.54	1.99	3.84	2.19	4.22	3.14	3.88	2.15	1.36	1.78	3.51
Stab1	3	36.93	31.53	33.49	49.79	13.74	12.81	9.72	15.23	23.46	40.06	33.38	36.36	17.17	17.77	11.67	6.47
Stard8	3	74.22	74.65	69.91	78.93	26.72	29.06	29.58	35.68	74.98	97.6	109.11	83.51	54.86	56.17	42.52	23.83
Sulf2	3	67.25	85.17	68.53	82.55	17.75	19.86	18.46	25.49	55.26	55.29	57.28	44.58	24.12	27.89	22.13	14.93
Syngr1	3	44.76	52.36	44.11	37.69	7.5	6.98	7.68	3.65	11.14	11.6	9.86	10.5	2.63	1.94	2.64	0.59
Tagap	3	33.24	25.97	25.75	28.89	18.46	15.45	13.53	19.09	19.71	15.79	19.05	19.96	7.23	8.41	10.32	13.49
Tbc1d12	3	5.27	4.87	4.77	4.57	1.4	2.9	2.11	1.97	2.3	2.27	2.72	2.17	1.94	0.91	1.7	1.37
Tbc1d2	3	4.69	3.7	3.55	3.9	1.11	1.36	1.21	1.43	1.09	1.34	2	2.33	1.07	1.52	1.1	2.19
Tcn2	3	42.6	39.48	41.4	41.89	18.11	18.94	18.74	15.08	37.21	28.57	30.42	29.56	27.97	29.28	19.16	9.8
Tef	3	10.4	9.52	8.97	11.01	3.5	3.18	2.65	3.95	5.75	7.25	6.87	5.9	4.31	4.28	3.62	3.53
Tfec	3	4.73	4.53	4.67	4.88	3.25	3.1	2.64	2.44	6.48	6.29	4.96	5.01	2.88	2.52	2.23	0.65
Tgfbr1	3	23.26	21.08	21.81	24.47	10.48	12.44	10.69	12.5	6.95	8.04	8.85	7.1	4.24	4.37	4.35	4.92
Tgfbr2	3	58.64	68.01	59.51	61.08	30.55	28.56	25.81	32.83	63.65	66.24	73.12	55.2	41.32	43.32	28.66	16.5
Tgm2	3	39.36	42.97	29.24	37.24	7.59	9.17	8.21	13.37	3.47	3.7	4.37	3.14	2.72	2.08	4.02	4.78
Thbs2	3	2.54	3.89	2.44	3.54	0.97	2.66	0.2	2.51	0.25	0.78	0.49	1.46	0.68	0.76	0.75	1.05
Thsd1	3	6.3	5.72	5.07	4.92	1.5	0.84	0.56	1.04	3.38	2.78	2.95	2.6	1.08	1.18	0.82	0.53
Tifab	3	19.21	18.11	13.91	17.13	15.93	15.61	13.96	11.7	7.04	5.37	5.52	6.22	11.06	15.89	11.15	11.83
Timp2	3	1301.2	1591.68	1270.35	1327.57	286.68	294.19	279.34	230.14	704.67	670.78	697.12	578.94	354.01	378.88	282.21	149.94
Tlr13	3	114.7	102.79	99.39	107.66	34.72	33.2	38.26	40.93	41.91	38.03	43.58	42.07	28.85	16.9	20.83	14.22
Tmbim1	3	30.37	30.18	27.67	26.62	17.31	16.91	15.86	13.5	21.42	19.93	22.64	18.67	11.89	13.75	14.04	10.94
Tmem144	3	3.88	4.69	4.58	4.5	0.93	1.26	1.59	1.29	2.53	1.97	2.08	2.76	1.37	1.05	1.15	0.82
Tmem204	3	1.81	2.4	2.2	2.23	0	1	0.6	0.62	2.53	2.12	2.58	2.17	0.42	1.36	0.36	0.46
Tmem206	3	40.66	31.14	36.18	34.6	25.63	23.26	23.27	21.6	22.33	21.09	22.19	22.68	14.53	13.28	16.86	13.41
Tmem221	3	5.37	8.01	5.9	4.97	4.49	2.05	3.33	1.98	2.84	3.78	4.43	3.56	2.58	2.25	1.43	1.43
Tmem246	3	8.24	10.15	7.94	8.84	2	1.32	1.9	0.6	9.17	6.04	7.73	5.79	1.04	2.66	0.86	0.4
Tmem37	3	249.88	252.76	242.82	221.93	106.59	109.15	110.4	65.19	145.69	120.11	122.34	140.13	90.35	105.5	76.32	23.85
Tmem38b	3	4.45	4.73	5.93	5.91	6.04	3.82	4.6	1.96	3.39	2.68	2.74	5.59	3.04	1.38	2.02	1.11
Tmem41a	3	18.74	16.19	15.85	15.69	16.46	5.6	11.77	7.09	14.34	11.32	12.25	11.81	6.39	9.56	9.68	5.5
Tmem63a	3	6.52	9.44	7.35	7.96	2.15	4.06	3.56	4.29	8.56	8.9	9.04	7.43	3.08	4.9	3.81	4.41
Tmem86a	3	150.61	166.46	139.06	141.05	48.81	41.42	48.92	35.77	39.1	30.34	33.73	37.91	25.75	24.54	28.54	12.84
Tmx4	3	7.48	7.31	7.13	8.3	3.56	3.99	4.22	5.58	3.13	3.83	4.4	4.18	3.2	2.36	3.04	3.58
Tnfrsf21	3	96.47	106.07	95.49	83.08	35.04	28.46	33.11	39.29	33.19	30.33	30.3	32.09	36.03	30.13	38.51	47.43
Tnfsf8	3	1.27	1.31	2.31	2.06	0.34	0.55	0.16	0.33	1.05	1.59	1.63	0.83	0.22	0.18	0	0.21
Tns1	3	8.19	6.43	7.01	8.73	2.76	2.76	2.06	2.18	6.15	7.36	6.72	6.04	3.62	4.08	3.11	1.82
Tns2	3	5.06	5.7	4.24	5.62	0.96	1.27	0.75	0.94	4.55	5.13	5.7	4.4	1	0.97	1.17	1.06
Tor4a	3	15.83	16.86	18.39	17.26	9.48	4.82	8.4	7.88	14.88	16.92	18.06	11.69	7.92	9.17	9.31	6.42
Tpbgl	3	40.7	45.52	43.71	44.89	4.55	2.78	4.51	3.53	12.6	13.35	16.31	13.4	3.26	3.14	1.7	1.67
Trem2	3	50.52	60.35	47.22	45.2	40.13	45.07	39.02	18.89	24.77	24.62	18.24	18.2	22.91	25.53	19.02	7.11
Trim35	3	28.77	33.38	31.26	27.74	11.18	13.88	14.97	16.45	26.46	25.33	31.11	24.08	15.98	20.42	16.84	16.53
Trim47	3	43.01	48.66	51.82	40.7	27.71	27.05	29.28	25.71	52.66	54.78	59.3	50.58	26.97	28.22	31.02	18.66
Trove2	3	3.51	3.55	3.97	3.21	0.73	1.32	1.48	1.27	3.58	3.7	3.73	3.19	1.36	1.62	1.61	1.28
Trp53inp2	3	17.07	18.83	16.51	20.51	6.08	6.08	5.94	9.52	9.88	11.27	13.75	12.59	4.95	5.5	6.92	5.49
Trpv4	3	5.26	4.46	4.29	4.54	2.43	2.11	2.66	2.15	6.78	6.79	6.14	5.75	4.3	3.82	2.79	2.24
Tsc2	3	13.08	16.16	13.88	17.74	6.37	4.3	6.2	11.39	8.84	13.87	15.58	12.12	10.12	7.87	8.36	10.6
Tshz3	3	1.27	1.34	1.73	1.46	0	0.05	0.09	0.25	1.42	1.16	1.47	1.34	0.25	0.37	0	0.17
Tspan14	3	102.08	106	91.04	93.49	46.57	42.11	51.15	49.09	63.31	65.68	69.51	60.72	49.4	55.56	47.41	36.04
Ttyh2	3	4.96	6.45	4.58	5.42	1.5	1.04	2.55	1.98	3.63	3.13	4.17	3.02	1.42	1.38	1.37	0.96
Uaca	3	2.58	2.94	2.46	2.37	0.18	0.31	0.33	0.55	4.17	4.11	4.27	3.39	1.03	0.81	0.59	0.17
Ube2g2	3	19.6	27.15	23.65	22.2	10.26	11.73	9.64	10.91	23.62	24.23	26.14	20.4	8.45	13.92	10.75	10.33
Uchl3	3	84.86	81.01	83.55	68.34	42.96	41.12	39.04	29.04	71.76	61.8	68.22	70.54	47.67	42.81	41.23	34.03
Umps	3	13.37	12.85	12.04	12.17	6.79	3.32	6.15	6.33	6.26	5.42	6.51	6.93	4.74	3.71	4.08	3.16
Usp2	3	4.05	3.82	3.87	3.34	1.06	1.29	1.38	1.05	0.64	0.74	0.72	0.71	0.41	0.27	0.43	0.41
Vcan	3	2.35	2.27	1.76	2.53	0.14	0.08	0.16	0.39	0.26	0.16	0.17	0.28	0.04	0.13	0.19	0.21
Vsig4	3	1539.43	1408.12	1205.42	1306.62	111.59	64.21	56.69	41.97	203.36	153.09	149.44	134.71	10.3	6.07	6.52	1.62
Wdr6	3	6.93	8.4	7.53	7.15	3.49	4.45	3.7	4.98	4.76	7.22	6.19	5.64	3.31	2.44	3.43	3.62
Xdh	3	85.17	68.33	65.13	85.61	38.45	29.74	32.87	44.9	49.81	48.51	57.08	55.1	45.27	47.07	37.7	35.11
Xrcc5	3	3.37	2.45	3.21	2.01	1.59	0.15	0.79	0.93	0.89	1.75	0.87	1.57	1.33	1.42	0.84	1.44
Xxylt1	3	15.41	17.41	18.3	16.16	5.81	5.92	7.62	8.42	11.36	13.28	15.49	11.95	7.94	8.83	8.42	7.53
Ykt6	3	43.57	44.79	40.6	44.47	20.07	17.18	19.03	21.26	18.95	25.23	30.51	26.75	17.23	16.68	18.14	15.35
Zbed3	3	4.16	5.56	3.67	4.53	3.8	1.39	1.75	1.74	2.71	2.17	3.05	4.04	2.46	0.78	0.68	1.27
Zdhhc14	3	27.99	36.54	31.43	33.48	16.34	12.52	14.8	16.74	31.06	32.2	36.42	26.62	17.14	19.37	15.78	8.49
Zfp472	3	9.75	6.43	7.15	7.48	4.19	1.11	3.49	2.91	6.19	4.13	4.86	3.58	3.66	4.23	1.86	2.03
1700025G04Rik	4	0.33	0.39	0.43	0.38	2.49	2.9	2.2	3.72	0.27	0.31	0.46	0.44	2.02	1.7	2.68	5.1
2810417H13Rik	4	1.66	2.21	2.03	1.75	4.89	6.05	5.29	9	0.53	1.26	0.74	4.8	3.34	2.64	5	6.37
4930455G09Rik	4	2.31	1.29	2.89	2.53	7.06	11.04	5.08	5.58	0.9	1.35	0.7	0.96	8.58	6.1	10.44	8.21
4930523C07Rik	4	2.16	1.71	2.01	2.25	5.57	5.61	5.31	8.05	3.29	3.7	4.12	3.55	4.56	4.37	5.71	12.06
5330406M23Rik	4	4.17	2.65	2.61	3.1	13	9.91	4.42	2.71	3.92	4.11	2.81	3.02	5.16	3.02	3.07	3.07
A530064D06Rik	4	0.94	0.35	0.25	0.71	1.3	0.94	2.58	2.72	0.09	0.13	0.18	2.55	1.9	0.19	5.55	10.3
AA467197	4	1.03	1.3	1.23	1.09	1.72	3.05	4.26	7.32	0.71	1.41	1.29	5.5	1.93	1.36	12.33	6.85
AB124611	4	2.09	1.82	2.31	2.2	9.85	9.01	9.17	9.7	4.69	2.83	3.17	5.56	8.01	9.67	9.55	9.22
Abca6	4	0.67	0.6	0.9	1.11	1.2	1.66	2.08	3.57	1.66	2.28	1.91	2.08	3.04	2.7	2.8	6.03
Abcg3	4	2.15	1.56	2.44	2.56	9.59	7.62	12.22	9.72	2.54	2.95	1.97	1.41	11.63	9.43	9.1	6.17
Acod1	4	0.51	0.66	0.13	0.33	3.49	1.4	2.71	4.45	0.39	0.23	0.42	0.88	0.85	1.42	2.51	3.29
Acot7	4	2.97	3.24	2.77	2.95	4.48	4.03	5.86	7.83	3.26	3.85	4.22	3.85	3.39	3.54	8.74	16.69
Acta2	4	0.61	0.39	0.96	1.65	4.19	3.98	8.65	8.02	4.35	3.88	3.49	6.01	3.45	4.31	6.74	2.71
Adam8	4	1.28	0.58	2.21	2.5	10.19	6.47	12.19	22.29	2.2	1.08	2.57	5.45	8.78	3.95	24.07	45.6
Adgre4	4	0.63	0.43	1.93	6.92	9.82	6.77	8.18	16.01	0.72	0.28	0.48	1.32	7.41	5.18	6.96	20.98
Adora2b	4	11.77	11.61	9.2	13.88	36.73	40.49	37.84	43.8	12.48	10.77	11.37	13.57	16.14	20.88	22.78	27.85
Adrbk2	4	0.06	0.08	0.19	0.37	2.24	1.51	1.25	3.02	0.02	0.1	0.1	0.14	1.02	0.99	0.75	3.89
Ahcyl2	4	1.27	1.16	1.31	1.31	2.42	1.77	1.58	3.66	1.15	1.24	1.3	1.18	2.11	1.49	3.55	8.74
Ahr	4	4.52	4.54	5.49	6	10.23	9.5	10.06	15.27	6.38	9.13	11.02	7.18	11.13	13.03	10.19	18.27
AI504432	4	0.78	0.67	0.94	1.03	4.3	3.94	2.96	2.93	0.37	0.35	0.24	0.57	0.84	0.43	0.85	5.12
Aif1	4	19.54	18.21	18.02	17.58	63.02	53.96	51.89	37.84	15.19	12.09	11.14	13.51	39.79	37.52	31.22	20.52
Aim1	4	1.05	1.11	1.43	1.72	4.94	5.3	5.13	14.43	1.37	1.62	1.96	1.7	5.54	4.37	7.74	21.63
Ak8	4	2.16	2.01	2.46	2.13	4.4	9.33	6.41	6.9	5.09	3.99	3.95	4.23	9.58	7.39	9.19	14.57
Alcam	4	2.75	1.7	2.57	2.52	4.18	4.63	3.54	4.32	2.47	2.08	1.36	1.28	2.98	3.02	4.24	8.54
Amz1	4	1.14	1.05	1.18	0.9	3.17	3.39	2.1	4.13	0.48	0.33	0.36	0.36	1.08	1.06	1.91	4.58
Anxa8	4	2.2	2.36	2.92	3.65	2.03	1.19	3.65	9.62	3.58	3.33	6.15	5.91	3.77	3.07	16.52	14.18
Aph1c	4	1.76	1.78	2.62	2.59	4.4	5.9	4.4	4.88	2.66	2.84	2.76	2.53	5.96	4.28	5.14	7.13
Areg	4	1.3	1.33	1.78	1.71	14.65	11.13	19.8	20.24	1.69	2.09	2.01	4.2	8.89	16.74	34.94	43.24
Arg1	4	3.04	1.8	3.17	4.82	3.63	0	9.15	7.22	0.15	0.25	1.35	3.46	4.02	0.54	9.3	2.1
Arhgap26	4	0.43	0.4	0.53	0.54	1.89	1.47	1.44	2.2	0.81	1.08	0.76	0.83	1.75	1.34	2.05	3.4
Arl5c	4	2.13	1.93	1.24	3.02	20.93	19.36	14.8	20.31	1.29	1.21	1.39	1.78	6.06	5.33	9.97	17.48
Atp1a3	4	3.96	4.55	3.35	3.25	2.26	2.3	3.25	4.55	0.46	0.61	0.57	1.28	2.04	1.98	5.9	6.62
Atp8b4	4	0.68	0.73	1.01	1.11	5.01	4.19	4.79	6.74	1.52	1.2	1.72	2.25	2.56	2.44	4.66	6.58
Avpi1	4	33.06	35.61	37.97	37.31	44.57	49.14	50.65	78.63	44.08	48.36	41.89	50.44	43.42	49.7	72.85	141.14
AW112010	4	1.1	1.2	1.04	1.91	17.67	12.28	12.93	9.57	4.44	2.83	3.32	3.47	9.77	9.1	3.71	4.78
Axl	4	6.86	7.19	4.8	5.6	14.65	14.38	14.46	20.66	0.91	1.75	1.22	1.63	5.52	4.56	9.75	13.06
B4galnt1	4	42.41	45.58	40.31	40.87	63.36	47.07	62.52	76.92	24.05	23.01	29.74	35.33	38.93	30.14	61.01	72.21
Basp1	4	10.7	19.06	11.35	27.27	17.64	38.45	21.88	30.81	5.55	2.82	3.18	2.83	14.97	7.34	13.54	10.27
Batf	4	9.52	16.97	12.89	14.63	63.71	73.4	64.67	47.71	35.92	44.14	25.22	25.08	51.7	55.49	44.45	45.38
Batf3	4	0.43	0.5	0.77	0.43	5.06	6.82	4.59	4.66	1.57	2.06	1.29	2.2	6.22	8.62	9.28	10.17
BC064078	4	0.17	0.48	0.32	0.43	4.29	3.75	4.42	3.52	0.83	1.06	0.66	0.47	4.99	5	4.93	2.97
Bcl2a1b	4	35.63	32.59	27.48	31.95	81.35	88.37	76.17	72.83	3.49	5.49	5.03	5.06	29.44	25.59	56.16	87.1
Bcl2a1d	4	3.51	6.31	3.83	5.68	44.42	59.32	48.07	62.91	0.4	1.68	1.16	1.55	16.21	19.64	33.29	94.45
Bcl2l11	4	5.16	6.22	5.77	6.55	11.04	9.41	9.03	13.16	4.39	4.91	4.62	3.74	4.12	4.97	4.42	9.18
Bcl3	4	15.16	19.7	20.24	21.95	43.85	54.99	45.41	62.47	45.24	50.4	40.35	41.38	38.41	55.06	44.55	57.17
Bfsp1	4	0.94	0.59	0.55	0.97	1.93	1.8	1.07	1.8	1.81	1.52	0.98	1.23	2.5	2.09	2.52	3.04
Bin2	4	8.85	9.14	7.43	8.6	12.18	8.18	10.33	11.29	3.19	3.35	3.21	5.25	6.59	4.63	8.23	12.45
Birc3	4	9.91	10.25	11.22	11.56	27.75	24.23	23.2	27.54	18.91	19.81	17.97	16.23	21.4	24.76	19.52	27.61
Birc5	4	3.63	5.63	3.22	3.35	8.13	9.6	6.67	8.5	2.66	4.33	1.56	5.62	5.1	3.91	4.61	6.63
Bri3bp	4	0.97	0.66	0.82	0.9	2.34	2.04	2.22	4.49	0.95	0.57	0.72	1.01	1.47	1.1	3.45	7.53
Btg1	4	83.25	74.07	77.17	83.88	163.07	170.55	166.47	148.07	60.35	69.29	71.91	69.11	110.18	108.24	151.6	201.54
Capsl	4	1.79	1.35	1.08	1.3	7.88	3.19	4.64	3.23	1.2	1.79	1.53	1.93	4.03	4.9	5.59	8.39
Ccdc109b	4	41.89	44.49	41.47	38.34	66.15	68.3	76.05	80.6	54.67	51.5	53.99	51.61	76.53	78.52	111.77	142.52
Ccdc69	4	1.15	0.91	0.8	1.16	2.7	3.52	2.45	2.71	1.22	1.75	1.1	1.76	3.11	2.75	3.48	3.37
Ccdc88b	4	2.71	3.57	1.91	2.32	4.7	2.94	2.68	4.23	0.87	0.85	1.14	2.35	1.99	2.14	1.99	5.42
Ccl6	4	96.42	72.92	126.07	161.2	513.71	413.33	724.4	539.81	298.54	215.69	247.46	471.22	995.68	782.12	1182.13	1052.18
Ccl9	4	136.93	120.44	151.01	160.79	329.1	280.1	378.51	321.02	299.27	261.22	261.28	350.7	424.73	352.66	489.75	491.43
Ccnd2	4	0.31	0.34	0.43	0.62	2.79	3.99	3.16	3.46	0.48	0.57	0.39	0.7	1.91	2.46	3.52	5.78
Ccr2	4	10.63	6.95	11.1	9.88	108.04	96.17	106.79	112.41	4.25	3.01	4.48	4.42	81.69	71.7	86.77	112.97
Ccrl2	4	22.02	23.53	21.64	24	93.21	88.47	84.78	80.77	13.44	10.82	10.35	10.54	46.04	39.43	52.65	65.05
Cd14	4	802.16	863.14	875.2	907.8	2623.54	2871.35	2661.94	2970.38	796.93	826.55	804.13	872.47	1498.27	1538.08	1833.14	2776.43
Cd2	4	2.23	2	3.24	1.85	13.93	17.9	16.5	14.96	4.76	4.44	2.99	3.15	24.24	24.47	41.08	39.86
Cd209a	4	2.2	2.54	2.84	3.48	14.82	22.35	15.22	50.27	12.08	9.8	9.06	9.23	31.54	39.93	23.23	142.14
Cd209c	4	0.25	0.18	0.43	0.47	1.33	1.63	0.69	1.96	0.81	0.65	0.37	0.46	2.61	2.27	1.16	5.17
Cd244	4	0.35	0.17	0.2	0.61	1.12	0.39	0.98	3.09	0.11	0.06	0.06	0.19	0.62	1.03	2.14	6.56
Cd24a	4	0.85	0.26	1.06	1.49	4.47	5.95	6.17	18.34	0.33	0.58	1.03	17.04	7.3	4.58	29.56	68.47
Cd274	4	2.31	1.89	1.7	2.13	5.56	4.68	8.12	6.67	3.56	3.01	2.15	2.05	3.86	5.43	5.21	3.87
Cd300ld	4	57.91	53.93	61.79	67.6	123.91	109.09	141.84	121.57	68.08	61.96	74.99	73.31	136.03	99.58	130.01	102.1
Cd52	4	11.52	11.08	10.58	15.49	201.49	192.97	200.91	258.51	3.17	3.29	4.84	41.6	108.83	91.61	260.84	474.38
Cd69	4	0.25	0.19	0.33	0.32	1.83	2.77	2.57	2.81	0.26	0.26	0.17	0.44	0.8	0.15	0.89	1.68
Cd72	4	1.2	1.34	1.12	1.14	3.17	3.82	2.73	3.08	2.41	2.12	1.68	1.58	1.31	0.88	0.59	1.53
Cd74	4	13.65	15.71	23.44	31.9	5385.71	5917.39	4943.66	6035.46	22.83	24.36	31.99	39.32	4274.33	4581.1	5150.81	10381.1
Cd79b	4	0.42	1.15	1.22	1.54	12.01	9.45	8.76	6.26	1.52	0.92	1.14	1.39	8.76	6.24	4.68	2.76
Cd93	4	6.88	4.65	7.8	8.31	31.1	24.18	22.72	17.11	10.46	10.92	9.36	11.43	18.9	15.38	11.77	7.01
Cdc42ep2	4	2.11	2.87	2.14	2.63	8.51	12.5	4.69	7.45	6.65	9.26	5.88	7.58	3.13	3.33	3.36	4.55
Cdk2ap2	4	9.39	9.2	11.35	11.57	29.95	28.53	30.02	33.36	33.26	26.98	28.06	41.94	31.65	27.26	41.43	45.23
Cdkn1a	4	75.19	80.44	84.14	81.97	195.65	192.52	178.93	164.65	122.26	123.68	116.2	122.2	116.83	147.46	133.98	152.51
Cep85	4	2.21	2.97	2.63	1.89	6.78	6.85	5.77	6.14	3.78	3.69	3.93	2.98	6.06	6.06	5.72	4.81
Chad	4	0.07	7.17	0.88	2.33	0	5.78	1.13	11.4	3.19	3.32	22.33	3.47	0.5	0	2.72	14.85
Chn2	4	2.27	2.29	2.26	2	2.46	2.6	2.5	3.15	0.84	1.08	1.06	0.79	2.29	2.65	3.48	5.95
Cish	4	0.13	0.08	0.19	0.3	1.04	1.22	1.22	1.93	0.32	0.56	0.39	0.47	0.9	0.92	1.36	3.01
Ckap2l	4	3.44	6.79	4.51	4.73	7.51	9.16	7.03	13.84	2.94	4.48	3.04	5.23	5.74	4.65	5.65	13.38
Cks1b	4	5.78	7.33	7.56	5.53	13.46	14.9	10.81	19.64	5.2	4.11	4.95	9.92	8	9.39	10.93	15.32
Cks2	4	14.02	13.72	14.33	17	40.84	56.34	54.64	44.88	15.32	18.73	16.52	34.08	28.94	34.62	45.03	53.83
Clec12a	4	27.26	30.55	24.27	21.1	45.53	51.77	43.48	31.27	10.4	15.15	9.3	12.9	24.28	24.42	20.46	20.3
Clec2i	4	0.06	0.06	0.22	0.12	1.75	3.18	1.43	2.65	0.25	0.24	0.19	0.21	2.87	2.79	1.69	3.1
Clec4a2	4	12.4	11.61	18.22	15.18	55.9	49.62	62.37	47.29	26.8	23.39	22.81	29.66	53.17	44.43	62.32	54.9
Clec4b1	4	1.36	1.38	1.92	1.55	49.23	55.48	62.93	65.76	4.33	8.52	4.37	2.99	56.7	59.2	92.97	130.73
Clec4e	4	4.81	4.86	5.84	7.83	35.04	31.68	31.32	39.24	1.98	2.52	2.59	5.88	13.65	10.09	21.88	31.52
Clec7a	4	17.5	19.02	17.45	17.87	31.5	41.37	38.36	34.94	4.86	6.56	4.11	3.91	19.09	19.98	29.28	44.32
Coro1a	4	39.48	41.19	39.96	42.35	86.5	76.59	78.1	94.25	34.98	38.53	35.9	51.49	61.79	49.9	72.63	105.95
Coro2a	4	0.07	0.1	0.16	0.14	1.49	1.38	1.56	3.57	0.13	0.06	0.18	0.2	1.28	0.74	2.42	5.68
Csf2rb	4	11.79	11.57	11.39	14.28	20.24	20.89	21.55	47.42	12.34	15.15	16.19	16.49	16.19	17.48	27.81	63.18
Csf3	4	1.03	0.9	1.61	2.34	16.2	18.86	10.65	15.08	2.82	3.17	2.83	2.93	5.7	8.88	11.13	11.47
Csrnp1	4	8.09	8.65	10.16	9.3	23.96	24.91	20.67	28.62	8.81	15.83	15.98	13.15	22.24	23.81	26.33	35.22
Ctsh	4	13.3	14.27	14.5	13.92	56.93	64.52	59.46	53.9	20.37	18.6	15.52	15.95	56.28	60.49	54.06	58.08
Cxcl1	4	38.61	32.72	43.59	61.76	151.41	164.65	178.81	160.22	56.9	64.85	61.2	80.29	115.63	127.16	152.9	109.87
Cxcl10	4	1.47	1.8	1.32	1.32	11.7	14.8	12.51	8.28	1	1.74	0.86	1.6	5.4	11.27	6.26	6.48
Cxcl13	4	0.32	2.01	0.5	2.88	24.01	28.42	13.81	12.12	1.78	0	0.48	3.28	7.65	9.14	2.86	3.1
Cxcl16	4	41.01	46.14	40.14	40.44	97.99	108.79	83.32	82.55	32.62	37.6	30.9	24.73	29.33	34.45	29.46	50.47
Cxcl2	4	55.23	45.41	60.42	66.93	295.02	316.33	306.6	227.94	90.61	111.96	94.89	104.65	239.72	266.68	289.28	174.95
Cxcl3	4	0.24	0.23	0.48	0.3	3.94	3.96	8.25	3.84	0.38	0.43	0.66	0.59	1.76	1.48	12.25	5.27
Cxcr4	4	13.53	12.92	14.53	18.11	17.55	20.03	16.73	15.16	3.66	7.16	7.46	8.22	9.9	7.47	10.51	10.45
Cyp2s1	4	0.36	0.18	0.26	0.31	0.98	1.31	1.17	2.57	0.17	0.16	0.24	0.29	0.47	0.4	2.09	3.78
Cyp4f18	4	15.04	16.35	12.18	14.64	62.94	63.75	62.96	51.91	8.07	7.05	5.41	6.26	40.65	37.57	45.82	40.12
Cysltr1	4	9.39	9.17	10.68	9.94	21.06	18.16	20.66	20.01	17.02	14.12	13.25	14.18	23.7	21.56	19.27	29.59
Cytip	4	1.06	0.53	1.13	3.14	14.43	10.67	12.48	33.41	0.24	0.37	0.54	1.78	5.07	4.52	10.73	59.62
D930030I03Rik	4	0.13	0.25	0.62	0.8	2.42	2.28	1.67	1.23	0.12	0.66	0.36	0.79	1.96	0.61	1.55	2.37
Depdc7	4	2.17	1.72	1.54	1.5	8.96	9.28	8.64	8.46	3.43	3.65	3.73	2.65	5.04	4.68	7.36	7.62
Dhrs9	4	1.39	1.19	1.6	1.12	5.1	3.25	5.98	4.77	0.72	0.4	0.93	3.1	6.06	2.22	12.45	16.3
Dppa3	4	0.95	1.37	2.24	1.61	5.84	4.13	5.13	2.01	0.97	1.19	1.68	0.48	3.27	1.19	1.41	0.68
Dusp1	4	266.77	222.49	278.69	263.54	540.26	506.31	543.96	499.27	467.04	333.82	362.01	347.76	653.15	562.42	618.52	715.84
Dusp2	4	5.11	6.34	8.36	7.8	50.67	55.87	45.75	52.02	6.87	9.8	6.13	5.74	17.1	14.9	17.05	26.45
Dusp5	4	4.41	5.95	7.28	11.35	60.21	45.07	55.65	84.93	3.27	6.47	8.35	10.03	29.56	24.03	45.77	113.85
Dut	4	2.22	2.12	2.2	2.36	6.59	5.14	5.89	5.88	2.48	2.41	1.9	4.27	3.62	3.05	5.15	6.04
E230016K23Rik	4	0.1	0.1	0.42	0.45	1.01	2.36	1.82	2.97	0.1	0.41	0.44	0.42	2.26	2.09	4.36	8.38
E2f2	4	1.41	1.52	0.86	1.76	2.18	2.82	1.84	5.46	0.13	0.4	0.41	2.33	1.25	0.96	1.77	5.36
Ebi3	4	6.32	5.34	7.11	5.55	46.97	40.39	31	31.68	14.42	10.46	9.87	16.11	34.05	35.25	24.55	23.88
Emb	4	14	8.02	23.37	23.23	152.85	134.13	185.3	231.42	38.34	29.89	38.67	55.42	191.44	161.09	197.87	296
Erdr1	4	3.85	2.31	0.89	2.25	15.45	8.55	3.1	5.34	4.7	3.41	1.13	2.98	9.5	4.88	2.62	5.98
Errfi1	4	9.5	10.92	12.03	14.21	41.65	37.97	41.56	72.25	16.19	19.36	17.46	19.71	22.45	32.27	38.19	75.17
Etv3	4	4.23	5.04	5.23	4.68	12.64	13.79	8.73	15.66	9.48	12.32	9.36	7.07	10.7	13.59	10.77	21.05
Eva1b	4	1.47	1.41	2.01	1.81	6.42	6.57	5.59	5.19	3.15	3.67	3.52	3.74	4.01	3.9	5.14	4.49
Ezr	4	47.41	49.12	44.1	48.74	49.22	42.1	53.83	91.1	21.01	23.42	27.03	30.53	26.86	26.95	64.39	106.66
F10	4	0.14	0.04	0.19	0.39	0.72	1.24	2.58	2.52	0.06	0.05	0.17	0.73	1.85	1.64	4.44	3.13
Fabp4	4	0.47	0.41	0.89	2.92	2.86	3.25	3.28	5.26	0.73	0.71	1.39	2.02	5	4.8	6.16	6.55
Fabp5	4	4.33	3.37	6.04	5.22	30.07	25.76	41.66	27.87	3.97	3.04	3.63	6.47	25.88	16.47	34.51	28.62
Fam107b	4	7.63	7.67	9.21	11.68	22.08	17.13	19.32	29.18	8.53	10.61	10.94	17.09	12.6	12.58	13.26	30.35
Fam129a	4	2.82	2.93	3.12	3.77	6.58	9.25	7.26	14.77	5.36	5.74	5.97	4.85	6.5	6.23	8	18.22
Fam26f	4	1.11	1.48	0.73	1.23	8.61	5.52	7.48	3	2.71	1.11	1.52	1.67	5.91	2.89	4.05	1.89
Fcgr4	4	4.73	3.04	6.62	9.17	26.98	18.81	21.42	15.07	3.99	1.54	2.92	7.16	14.93	10.44	10.13	5.77
Fcrls	4	53.99	68.97	72.43	61.38	122.45	113.38	133.17	91.58	35.85	29.47	34.09	29.79	148.75	154.68	159.71	111.12
Fem1c	4	19.13	21.09	23.13	25.94	51.76	48.97	45.44	51.76	25.26	33.13	31.71	27.77	42.08	45.27	43.71	56.78
Ffar4	4	0.17	0.83	0.9	0.35	1.41	1.88	4.68	4.8	0.41	0.35	0.56	0.7	1.52	1.46	7.18	8.83
Fgl2	4	6.4	4.98	13.09	14.98	27.6	27	29.38	39.74	18.8	16.24	15.5	23.27	32.28	20.73	25.09	53.57
Fgr	4	6.6	5.71	5.84	6.17	10.78	8.97	9.96	14.91	0.8	0.95	1.14	2.59	6.2	3.27	12.76	20.43
Flrt3	4	0.59	0.22	0.68	0.61	14.3	12.62	19.97	39.44	0.13	0.35	0.44	0.66	8.37	6.46	17.93	74.05
Flt3	4	0.03	0.08	0.21	0.16	1.43	1.92	1.36	6.38	0	0.03	0.18	0.06	0.5	0.01	0.7	10
Gadd45b	4	127.61	160.87	156.2	133.98	439.03	507.89	414.02	325.35	204.97	247.33	158.16	157.97	347.81	427.79	314.76	303.21
Gapt	4	6.79	4.73	4.94	5.43	13.43	13.93	13.79	13.35	4.33	4.13	3.51	7.75	14.69	14.63	14.47	15.55
Gbp9	4	1.04	0.7	1.02	1.25	4.19	3.19	2.78	3.44	1	1.2	0.93	1.23	3.24	2.34	2.42	3.48
Gda	4	4.26	3.55	5.07	5.67	7.64	5.84	6.61	8.3	7.49	6.22	5.6	7.78	10.48	10.39	10.31	12.6
Glipr1	4	5.66	4.85	5.51	4.06	12.77	12.14	12.37	10.29	2.8	3.49	3.61	4.13	5.42	3.23	7.07	10.44
Glipr2	4	1.55	2.91	3.44	4.39	13.35	9.14	17.51	35.24	1.63	2.84	3.68	10.76	10.66	6.61	31.69	61.9
Glrx	4	39.05	33.06	43.47	39.91	75.49	75.93	91.3	71.97	43.89	36.74	38.29	85.15	83.81	54.1	87.03	93.85
Gm12840	4	55.32	48.57	48.17	57.66	57.18	85.63	70.89	87.49	90.88	80.56	67.45	73.88	85.5	107.05	114.66	185.92
Gm13391	4	0.64	0.35	0.43	0.18	1.68	3.26	1.97	0.77	0.77	0.64	0.33	0.27	0.96	1.45	1.18	0.17
Gm13710	4	0.54	0.09	0.34	0.82	7.48	0.97	3.26	1.94	0.59	0.09	0.91	0.45	1.57	0.67	0.85	0.85
Gm14548	4	3.42	2.99	4.55	4.15	15.31	14.37	17.38	26.37	5.14	5.86	5.84	5.88	15.04	9.77	18.34	30.31
Gm14636	4	2.03	1.4	1.94	2.44	4.83	5.04	3.38	3.92	4.75	3.65	3.61	3.15	4.37	5.45	3.62	7.21
Gm15445	4	2.41	1.92	1.89	1.63	5.21	6.75	5.5	5.08	3.97	3.62	2.39	4.23	4.22	3	4.27	2.48
Gm15832	4	0	0.44	0.31	0.8	3.57	0.93	2.59	1.98	0.44	0.6	0.48	0.6	0.98	0.74	1.4	2.38
Gm16712	4	0.56	0.18	0.7	0.75	4.94	1.61	1.94	2.31	1.05	1.11	0.34	1.24	1.46	1.21	1.31	2.46
Gm17056	4	0.74	0.2	0.45	0.64	3.47	4	1.6	2.42	0.45	0.84	0.63	0.42	1.66	1.92	1.31	1.25
Gm1966	4	0.91	0.73	0.88	0.72	7.41	9.16	5.72	8.44	3.03	2.46	1.83	1.92	6.67	6.27	4.96	11
Gm2000	4	3.54	4.94	4.35	2.2	6.47	8.26	13.85	8.66	4.61	2.72	2.49	4.1	6.67	8.89	6.74	3.88
Gm20400	4	4.74	4.35	4.8	4.24	10.43	20.14	14.97	18.92	7.88	11.84	10.18	8.96	17.68	24.64	22.35	38.38
Gm20703	4	9.77	7.82	7.99	8.28	21.07	19.09	16.93	17.37	14.8	12.9	10.38	16.74	13.76	14.67	12.62	11.94
Gm26780	4	0.58	0.51	0.96	0.79	3.04	1.74	1.81	1.86	0.14	0.34	0.36	0.34	0.72	0.09	0.34	0.78
Gm26809	4	128.93	139.2	137.64	150.23	194.18	241.5	191.34	232.09	209	220.76	182.37	178.35	252.63	285.61	277.85	439.26
Gm26880	4	4.14	4.74	6.14	2.42	8.64	9.16	11.24	7.31	5.01	4.96	6.57	3.69	8.6	9.94	13.88	10.47
Gm26885	4	0.79	1.03	1.49	1.23	2.56	4.43	2.74	4.16	1.35	0.65	1.51	1.08	2.26	2.21	2.54	4.7
Gm29336	4	2.54	2.63	0.99	1.92	7.54	5.27	2.48	2.97	2.19	0.85	1.16	1.7	4.25	2.17	2.99	0.8
Gm29408	4	12.91	21.98	14.77	17.59	27.86	38.9	45.55	40.93	26.91	35.33	26.72	22.51	36.3	55.97	52.27	91.54
Gm2a	4	66.3	76.08	72.61	69.34	114.89	136.21	136.23	205.79	71.52	56.23	62.69	62.57	101.77	117.57	167.03	379.54
Gm36933	4	0.47	0.34	0.59	0.36	6.09	2.31	0.93	0.74	0.33	0.51	0.33	0.4	1.14	0.74	0.65	1.05
Gm37033	4	0.87	0.38	0.67	0.82	4.77	2.27	1.34	1.94	0.73	1.07	0.72	0.66	1.54	0.43	0.7	1.16
Gm37787	4	0.41	0.4	0.97	1.05	6.26	11.44	10.13	3.49	1.75	3.11	3.79	1.45	5.8	4.83	7.33	5.9
Gm38062	4	0.39	0.31	0.49	0.4	2.61	2.05	1.15	1.22	0.25	0.39	0.42	0.2	0.63	0.79	0.31	0.87
Gm4149	4	3.02	0.96	0.94	2.37	6.87	9.43	7.53	4.38	1.89	2.01	0.92	2.02	3.51	7.18	5.92	5.08
Gm4604	4	1.87	2.38	2.34	0.94	4.03	9.42	5.47	5.81	2.05	4.04	2.28	2.49	4.35	4.35	4.76	5.01
Gngt2	4	2.96	1.69	2.72	3.58	6.05	5.97	4.84	5.72	1.41	1.14	1.47	1.97	1.59	0.59	1.23	1.1
Got1	4	39.45	37.22	39.65	45.16	54.22	47.74	56.19	80.42	24.37	22.2	26.53	31.81	33.2	31.3	47.2	96.26
Gpnmb	4	4.58	4.05	5.98	5.56	11.85	9.67	15.01	7.64	2.4	1.5	3.32	2.75	6.54	5.33	6.47	3.63
Gpr132	4	1.29	1	1.78	1.71	15.4	12.59	10.35	15.94	0.65	1.04	1.37	1.25	6.69	7.04	10.26	23.61
Gpr141	4	0.18	0.2	0.6	0.68	5.56	7.46	6.08	12.71	0.03	0	0.1	2.05	1.98	2.11	3.08	11.18
Gpr35	4	0.19	0.19	0.3	0.62	1.52	1.85	1.79	4.78	0.18	0.07	0.3	0.36	1.01	0.66	2.84	7.29
Gpr65	4	28.18	24.69	23.59	26.26	37.04	28.7	28.69	32.69	10.85	10.52	9.8	13.35	16.39	12.74	15.69	24.07
Gpr68	4	0.34	0.38	0.81	0.41	1.44	1.84	2.49	2.56	1.82	1.96	2.4	1.58	1.54	1.68	3.24	3.59
Gpr84	4	6.73	7.69	7.5	9.33	18.49	16.26	14.15	17.26	4.34	4.38	4.73	8.08	3.69	4.37	5.53	6.82
Gprc5a	4	1.46	2.17	2.08	2	1.07	1.32	1.48	6.31	4.05	6.22	4.05	3.04	1.58	0.65	3.77	17.11
Gramd4	4	0.32	0.47	0.58	0.57	1.06	2.37	1.2	3.46	0.29	0.56	0.52	0.63	1.23	0.71	2.61	5.06
Grasp	4	3.37	2.93	3.28	3.9	2.53	2.54	3.3	8.78	0.68	1.02	0.88	1.75	0.74	0.62	2.27	9.31
H2-Aa	4	2.15	3.61	4.88	6.86	1626.61	1843.84	1567.55	1938.71	3.73	4.3	4.72	8.41	1147.56	1303.79	1391.18	2743.97
H2-Ab1	4	9.74	9.3	12.06	16.14	2867.53	3149.15	2686.03	3410.15	9.3	10.96	9.43	15.29	1974.17	2118.1	2346.76	4988.9
H2-DMa	4	12.71	12.56	16.5	14.96	229.98	308.53	268.21	261.97	15.1	14.67	11.18	14.18	200.46	235.58	310.04	450.3
H2-DMb1	4	10.82	10.61	11.15	14.68	212.24	264.12	238.54	322.19	11.36	10.29	9.69	12.76	166.51	178.28	265.6	521.39
H2-DMb2	4	0.19	0.46	0.56	0.64	5.37	4.13	4.72	10.8	0.39	0.19	0.48	0.53	3.01	3.24	10.62	31.88
H2-Eb1	4	4	6.94	8.28	14.49	3795.57	3912.42	3583.02	4497.3	10.59	7.78	10.41	12.63	2403.92	2534.07	3071.49	6590.82
H2-Q5	4	0.57	1.05	0.93	0.84	4.5	3.44	2.5	3.26	1.03	1.25	1.38	0.68	2.6	2.87	2.09	3.61
H2-Q6	4	0.63	0.87	0.41	0.6	5.85	4.2	3.94	4.66	0.45	0.4	0.18	0.32	1.24	3.17	1.77	6.19
H2-Q7	4	0.24	0.45	0.34	0.45	2.47	2.68	2.44	2.76	0.48	0.38	0.39	0.31	1.2	1.47	1.23	2.33
H2afz	4	66.56	68.38	74.38	64.84	120.79	141.55	142.62	156.21	70.12	76.46	65.28	97.94	99.87	103.2	142.45	243.42
Hba-a1	4	1.73	0.78	1.91	3.8	27.86	34.11	1.89	8.27	1.91	3.96	2.98	2.96	6.66	0.85	1.56	3.37
Hba-a2	4	2.66	1.77	1.85	4.56	40.08	36.33	2.04	8.65	1.63	5.32	5.08	2.9	5.96	3.02	2.59	3.07
Hbb-bs	4	2.9	0.67	2.4	4.89	40.04	43.31	1.38	11.18	1.82	6.94	5.39	2.73	8.68	1.72	2.49	1.92
Hbb-bt	4	0.86	0.49	0.65	2.09	24.57	15.31	2.36	5	1.13	2.58	3.79	1.38	2.41	1.93	0.61	2.94
Hcar2	4	4.46	4.44	4.55	2.98	7.73	12.24	6.94	5.64	4.61	6.4	5.06	4.09	8.84	8.66	8.66	11.44
Hilpda	4	9.32	8.47	10.29	12.48	28.4	28.42	40.98	27.92	7.78	8.49	7.99	12.53	21.25	18.26	22.05	22.99
Hist1h1b	4	0.49	1.25	0.46	0.33	4.93	4.24	5.74	7.02	0.61	0.98	0.75	4.75	2.42	1.06	3.08	2.32
Hist1h2ae	4	1.85	2.52	0.99	1.6	4.27	5.14	5.41	5.91	1.49	3.16	1.93	6.87	5.07	3.44	4.66	3.75
Hist1h2ap	4	3.52	5.77	5.68	0.51	20.36	25.06	17.46	24.22	2.36	5.78	1.61	19.17	12.09	15	12.45	14.31
Hist1h4d	4	1.54	3.83	4.06	2.49	10.65	12.03	14.78	12.4	2.32	5.86	6.21	8.97	6.2	11.21	7.64	5.85
Hlcs	4	0.48	0.4	0.41	0.63	1.14	1.41	1.29	1.81	0.63	1	0.83	1.14	1.31	2.35	2.18	2.79
Hmga1	4	1.7	1.9	2.2	1.93	4.24	5.49	4.16	5.68	2.81	3.22	3.56	3.35	3.22	3.89	4.78	4.42
Hr	4	0.14	0.05	0.13	0.15	0.01	0.19	0.13	0.4	0.07	0.06	0.11	0.08	0.23	0.19	1.34	3.18
Hsp90aa1	4	10.75	11.09	11.9	11.57	23.84	29.39	24.5	22.63	16.92	20.5	17.02	17.31	23.55	25.21	23.97	24.61
Ibsp	4	0.18	0.67	0.55	0.24	0.32	0.06	1.49	1.32	0.72	0	0.05	0.12	1.59	0.27	12.23	2.72
Icam1	4	69.4	110.14	76.26	80.71	165.08	240.52	175.92	237.36	89.52	167.91	114.16	94.2	124.64	183.23	155.33	261.3
Icosl	4	7.39	8.53	6.99	8.58	17.99	15.62	11.66	24.55	3.76	6.2	5.92	4.37	10	8.73	10.42	25.82
Id2	4	226.91	201.11	236.57	209.99	456.7	523.76	487.67	354.31	160.71	202.96	170.07	172.7	272.72	258.82	350.23	353.94
Id3	4	13.91	14.49	13.22	22.45	50.56	45.46	36.81	36.28	12.52	16.27	11.33	19.09	26.24	24.49	23.37	25.07
Ifitm1	4	0.39	0.69	0.31	0.79	2.22	2.41	0.87	3.23	1.05	0.72	0.92	1.62	1.75	0.73	0.98	3.69
Ifrd1	4	23.52	26.86	28.5	27.56	54.24	62.99	59.63	55.44	31.08	37.37	36.93	31.01	45.5	53.41	53.84	50.02
Il10	4	4.63	4.86	5.05	7.3	77.41	66.14	67.05	52.69	9.57	5.46	10	12.06	36.88	38.3	33.17	18.52
Il18rap	4	0.01	0.02	0.13	0.05	1.52	0.75	1.1	3.35	0.12	0.1	0.09	0.82	0.45	0.24	1.25	3.56
Il1a	4	5.22	4.28	7.85	7.7	57.33	47.95	62.99	66.95	6.75	8.16	5.79	4.68	23.08	19.18	49.45	78.74
Il1b	4	17.76	21.88	18.81	38.78	586.62	455.13	410.66	914.47	9.78	11.14	9.75	17.71	99.7	107.63	242.34	1224.04
Il1r2	4	0	0.19	0.25	0.58	3.64	3.65	3.85	24.88	0.25	0.2	0.28	11.25	2.38	1.82	3.38	36.77
Il1rl1	4	0.12	0.46	0.51	0.57	1.32	2.26	2.22	3.17	1.05	0.61	1.31	0.79	1.6	1.45	2.94	6.49
Il1rl2	4	2.84	2.29	1.92	2.29	3.93	4.85	3.75	3.93	1.8	1.28	1.55	1.12	2.78	3.48	3.88	4.12
Il1rn	4	4.22	3.61	4.36	5.23	22.73	24.43	26.33	21.81	3.88	5.19	5.5	5.48	14.15	9.76	17.76	15.57
Il2rg	4	6.91	6.4	7.07	7.78	25.51	19.72	23.11	24.93	7.78	6.43	7.87	7.95	18.01	13.61	19.07	22.03
Il6	4	0.79	0.36	1.01	1.47	4.8	1.91	2.53	6.4	0.78	0.74	0.61	2.15	2.83	4.72	5.94	25.57
Il7r	4	1.29	0.79	1.14	0.84	9.1	10.43	12.01	15.09	0.67	0.11	0.73	1.17	5.81	2.5	11.54	23.8
Irf4	4	3.27	3.55	4.26	4.02	7.84	9.75	10.41	17.7	5.73	8.96	7.06	5.02	9.49	12.47	17.41	38.44
Irf7	4	1.14	1.25	1.18	1.18	4.96	3.26	4.4	2.63	1.86	1.24	1.3	1.19	3.09	2.81	1.64	0.9
Itga1	4	0.08	0.02	0.29	0.18	1.07	0.79	1.72	3.33	0	0.02	0.24	0.22	0.78	1.1	2.65	4.36
Itgal	4	0.34	0.37	0.48	1.16	1.32	1.39	1.12	2.66	0.1	0.07	0.19	0.69	0.45	0.62	0.66	2.62
Itgax	4	0.02	0.13	0.41	0.32	3.32	5.84	4.54	12.59	0	0.14	0.09	0.26	2.99	2.62	10.75	25
Itgb7	4	2.68	1.8	3.81	4.93	13.51	14.41	14.55	64.62	3.4	3.46	4.94	5.29	14.24	6.97	27.29	115.86
Itpkb	4	3.74	2.99	2.31	4.07	9.04	5.15	3.82	6.55	1.6	3.19	2.73	2.2	3.83	3.68	4.12	6.29
Jdp2	4	2.09	4.3	3.32	7.45	10.04	15.03	11.86	20.16	6.17	5.94	5.17	7.88	6.09	6.75	7.97	6.8
Kcna3	4	9.88	8.83	9.05	11.47	22.77	21.95	22.68	46.24	3.24	3.82	4.38	4.22	8.41	6.65	16.83	46.84
Kcnn4	4	17.64	17.89	16.13	14.03	14.36	13.5	15.61	20.64	5.52	5.24	6.1	5.44	8.42	6.63	19.11	21.94
Kcnq1	4	0.2	0.15	0.32	0.22	1.68	1.66	3.33	3.4	1.33	1.09	1.39	0.65	4.6	6.34	6.8	9.45
Kdm6b	4	2.53	3.02	3.45	2.78	13.04	14.14	9.57	8.55	6.1	7.02	4.56	4.11	7.42	9.85	7.34	10.65
Krt80	4	2.05	2.28	2.25	4.21	17.18	21.98	19.11	27.09	1.54	2.32	3	3.08	21.8	21.78	25.7	45.88
Lgals3	4	195.92	161.95	219.83	210.36	456.11	422.34	566.31	435.87	297.84	264.79	312.73	364.52	419.95	309.96	606.57	481.26
Lilra5	4	1.38	1.32	1.46	1.1	5.65	4.73	2.3	1.99	1.13	0.75	0.95	0.69	1.66	3.27	0.54	0.33
Lilra6	4	0.46	0.5	0.66	0.72	3.7	2.73	3.58	4.12	1.1	1.05	1.44	1.1	2.19	1.75	4.24	6.23
Lmnb1	4	2.56	3.11	3.58	2.83	6.13	5.96	7.34	16.22	1.79	1.18	3.11	6.63	5.69	2.39	4.12	13.16
Lmo1	4	0.16	0.35	0.31	0.29	1.41	1.11	1.08	5.16	0.27	0.29	0.64	0.82	1.61	3.39	4.63	8.8
Lpl	4	23.64	22.92	30.89	19.92	133.24	94.39	127.76	92.05	37.67	40.05	44.25	29.76	125.51	70.98	158.02	142.66
Lrrc32	4	0.04	0.04	0.17	0.42	1.14	2.07	0.91	2.67	0.17	0.36	0.41	0.31	0.33	0.44	1	2.9
Lsm7	4	13.48	12.37	9.74	11.26	32.43	25.53	23.81	18.89	15.83	13.72	12.33	18.7	19.7	17.63	26.26	17.93
Lsp1	4	23.96	27.41	22.8	20.82	43.01	49.62	47.39	70.77	18.95	19.81	17.1	16.53	31.1	33.21	54.05	107
Lsr	4	0.43	0.45	0.43	0.45	2.78	2.65	3.86	6.46	0.21	0.54	0.6	0.35	1.66	1.22	3.18	6.99
Lst1	4	23.09	13.95	15.93	28.65	176.87	158.16	156.52	105.15	19.77	19.56	19.26	27.83	111.06	100.2	86.1	34.63
Ltb4r1	4	0.35	0.33	1.31	2.37	18.68	8.38	20.58	45.21	0.16	0.09	0.48	17.44	13.07	7.62	47.88	107.38
Ly9	4	2.97	3.11	2.97	2.98	6.85	3.88	5.56	4.74	2.53	1.7	2.15	2.13	5.79	4.36	3.8	2.09
Lyz1	4	482.45	402.58	442.02	484.12	891.14	1165.27	1123.63	892.59	240.36	248.58	231.73	279.8	1394.45	1421.91	2768.65	3148.64
Maff	4	0.76	1.12	1.13	1.25	4.98	7.8	5	5.67	1.16	1.96	2	2.15	3.95	4.45	5.18	5.15
Malt1	4	3.94	4.31	3.08	3.65	12.51	10.35	12.94	23.5	3.14	3.41	4.62	4.12	7.81	4.21	14.57	29.14
Map4k1	4	0.32	0.05	0.29	0.29	2.62	1.29	2.44	3.69	0.47	0.14	0.2	0.78	2.45	3.16	5.34	7.99
Marcksl1	4	107.3	132.09	141.74	145.85	525.56	539.58	410.47	453.8	180.7	301.72	286.09	285.27	411.46	469.37	361.01	389.51
Matk	4	1.24	1.23	1.18	1.28	4.27	4.84	4.23	2.96	1.8	2.52	1.74	1.73	2.9	2.44	3.79	3.46
Mcm5	4	2.23	3.12	2.74	2.86	5.85	6.99	4.79	7.44	1.87	2.15	1.84	2.9	3.88	2.48	3.85	6.22
Me2	4	15.91	17.59	19.82	18.92	33.1	28.61	38.53	54.34	30.13	29.26	32.87	38.48	49.24	36.5	61.83	93.28
Mefv	4	0.15	0.25	0.13	0.67	8.8	7.97	5.54	19.82	0.13	0.11	0.12	0.65	1.79	2.39	3.05	17.44
Mgl2	4	4.94	6.56	9.15	7.64	82.97	99.34	81.37	119.65	47.31	43.24	32.71	32.17	166.52	188.7	143.06	266.78
Mir142hg	4	4.06	9.47	5.93	8.2	19.46	14.15	12.34	17.28	10.17	6.75	8.66	9.04	10.24	9.66	17.53	10.68
Mir155hg	4	0.74	0.84	1	0.89	2.74	5.6	4.24	5.83	0.52	0.83	0.59	0.69	1.53	2.28	2.45	4.86
Mmp13	4	1.18	0.69	1.62	0.69	3.96	8.69	7.54	4.24	1.83	3.67	3.16	1.41	3.65	1.65	3.37	2.84
Mmp19	4	2.17	2.04	3.08	3.63	10.71	12.2	16.41	16.95	5.58	4.05	5.18	5.06	14.42	8.25	27.24	18.95
Mpeg1	4	13.68	6.25	9.78	12.3	39.45	58.29	29.67	28.58	5.15	8.21	3	3.34	23.54	22.18	27.43	41.34
Mpp6	4	3.73	4.12	4.65	4.71	11.81	11.33	12.96	13.06	9.12	7.31	6.51	7.19	14.42	14.23	16.61	23.46
Mrpl52	4	6.89	6.37	6.56	6.16	14.67	13.01	12.95	13.78	5.81	5.39	4.94	8.84	10.31	9.28	11.74	13.43
Ms4a4c	4	0.66	0.42	1.11	1.33	17.52	11.84	16.38	16.73	0.53	0.31	0.16	1.45	5.24	3.91	2.84	13.44
Msrb3	4	0.16	0.26	0.04	0.23	0.77	0.72	0.76	1.33	0.22	0.55	0.42	0.69	0.94	1.51	1.02	2.73
mt-Tp	4	14.48	6.91	15.31	3.66	7.81	9.8	21.23	3.38	8.5	3.62	8.28	1.81	6.33	11.81	21.33	12.01
Mthfd2	4	1.35	2.13	2.45	2.27	4.66	4.72	4.63	6.08	2.53	3.05	4.12	3.4	3.17	3.09	5.56	10.45
Mxd1	4	5.21	5.58	6.88	8.82	24.9	22.61	21.72	31.08	8.59	10.52	9.11	18.24	16.6	17.1	17.1	17.33
Naaa	4	6.65	7.32	7.6	8.03	31.67	28.14	32.57	40.16	12.85	13.37	12.46	11.9	33.27	34.1	44.28	77.35
Napsa	4	0.63	0.7	1.83	3.56	14.02	17.4	19.9	38.9	0.52	0.66	0.84	5.72	8.6	6.91	20.25	68.18
Ndc80	4	4.02	5.47	4.51	4.4	8.2	7.81	6.89	9.06	3.37	3.63	2.02	4.75	4.52	7.65	4.74	7.63
Ndnf	4	0.19	0.11	0.25	0.22	3.47	4.58	3.58	4.59	0.11	0.09	0.37	0.22	3.09	2.7	3.77	9.04
Ndrg1	4	2.39	2.24	1.94	2.73	6.45	7.08	6.97	10.15	3.13	3.85	4.09	3.3	3.52	2.34	4.43	7.36
Net1	4	0.18	0.36	0.34	0.62	0.95	0.6	0.88	1.87	0.25	0.47	0.51	0.57	1.16	0.65	1.63	6.82
Neurl3	4	8.48	10.26	6.08	8.67	35.56	42.69	34.71	45.56	7.19	8.15	5.25	5.15	21.39	22.66	23.71	34.21
Nfil3	4	11.13	9.6	16.71	17.78	94.22	75.88	76.35	95.33	17.04	25.23	20.98	23.94	78.5	65.92	79.44	131.47
Nfkbia	4	591.81	588.38	632.04	608.83	1316.7	1493.06	1292.29	1211.35	772.29	802.81	720.43	789.91	969.27	1064.6	1029.13	1151.81
Nfkbib	4	17.46	17.83	18.14	20.11	43.95	48.67	43.27	41.93	29.05	27.38	24.94	28.2	31.71	37.96	36.69	35.74
Nfkbid	4	27.37	32.52	32.69	34.83	53.28	55.77	57.8	63.96	56.16	63.74	60.25	54.1	62.42	68.84	73.6	82.76
Nfkbie	4	35.85	36.52	38.59	41.34	108.37	91.38	89.71	137.59	38.39	54.46	46.19	48.54	54.55	61.54	73.12	125.59
Nlrp10	4	0.13	0.08	0.2	0.16	0.78	0.38	0.55	1.33	0.23	0.3	0.2	0.11	1.18	1.13	1.46	1.91
Nlrp3	4	1.55	2.25	2.14	2.43	14.28	11.74	8.41	12.53	1.1	2.54	1.88	2.25	5.33	6.36	5.91	8.95
Noct	4	1.29	1.52	1.94	1.95	5.03	4.87	4.89	4.89	1.6	2.47	2.36	2.69	3.14	3.07	3.94	3.87
NoGeneName	4	0.57	0.54	0.43	0.69	2.09	6.77	3.89	3.19	2.67	3.3	1.67	1.82	8.25	14.2	15.02	17.36
NoGeneName	4	4.21	3.53	3.6	5.54	15	11.33	5.36	8.05	3	2.8	1.87	1.34	4.18	2.32	3.76	5.81
NoGeneName	4	9.01	9.34	12.7	9.88	32.55	25.7	29.74	23.81	14.81	15.04	16.66	9.8	27.04	24.64	29.95	22.26
NoGeneName	4	0.73	0.32	0.73	0.68	5.84	3.3	1.8	1.58	1.09	0.92	1.02	0.97	3.25	3.02	1.71	1.6
NoGeneName	4	0.56	0.8	0.7	0.66	1.8	2.11	4	3.39	1.31	1.11	2.04	1.21	2.27	1.73	2.63	2.64
NoGeneName	4	11.13	8.5	10.46	9	26.41	20.47	22.84	22.88	10.46	12.22	6.11	10.04	23.33	17.62	24.91	12.66
NoGeneName	4	5.55	6.05	9.68	5.61	13.68	6.01	4.65	1.48	5.21	1.58	1.45	1.59	6.92	7.39	3.74	4.51
NoGeneName	4	1.59	1.1	0.91	1.2	5.37	4.99	2.55	2.18	2.57	2.27	1.28	1.47	2.39	1.33	1.32	1.8
NoGeneName	4	1.95	1.57	1.13	1.81	4.52	5.34	3.66	3.43	3.3	2.32	2.67	1.8	6.08	3.35	4.14	4.61
NoGeneName	4	3.39	3.24	2.57	3.98	7.56	12.44	5.67	5.42	3.6	4.59	4.51	6.8	4.78	4.49	4	6.02
Nr4a2	4	7.3	6.2	7.19	11.66	10.21	6.74	9.65	19.71	3.04	2.49	3.89	4.09	6.09	3.33	9.87	30.34
Nr4a3	4	0.39	0.12	0.43	0.55	1.29	0.92	0.94	1.89	0.25	0.15	0.33	0.25	0.64	0.9	1.1	5.72
Oaf	4	0.87	0.79	1.43	1.17	2.07	5.09	3.11	8.51	1.05	1.81	2.08	2.39	3.85	3.81	5.96	8.64
Odc1	4	15.05	17.23	18.26	17.71	44.74	39.22	52.54	48.68	16.29	15.12	18.78	19.24	32.03	25.07	34.01	32.5
Olfm1	4	0.18	0.53	0.6	1.81	6.32	12.34	10.34	22.43	4.49	2.26	1.94	2.44	18.59	7.64	23.24	24.56
Padi2	4	0.5	0.3	0.59	0.78	5.48	4.1	3.23	7.25	0.26	0.25	0.46	0.27	1.86	2.18	3.5	10.47
Parvg	4	1.63	2.12	1.39	1.44	2.27	4.43	1.76	3.57	0.18	0.08	0.2	2.25	0.99	0.54	0.72	1.47
Pde4b	4	3.38	3.23	3.72	5.01	15.11	16.51	15.15	20.48	4.34	5.31	4.32	4.84	8.48	9.89	12.59	23.11
Phf11a	4	0.99	0.77	1.01	0.63	3.48	2.52	4.03	2.09	1.09	0.72	0.66	0.54	2.9	3.92	2.96	5.43
Phf11b	4	5.53	5.67	5.01	6.11	15.03	16.3	19.72	14.17	10.2	9.72	6.84	8.83	13.87	17.56	11.47	13.79
Phlda1	4	1.78	1.1	1.87	1.86	11.38	11.87	9.23	10.89	0.69	2.31	1.63	4	9.12	9.05	11.57	14.03
Pilra	4	3.05	3.6	3.94	4.03	16.67	23.93	19.77	21.63	2.46	3.09	2.33	6.33	8	10.57	15.07	22.77
Pilrb1	4	0.35	0.36	0.4	0.54	2.85	3.15	2.11	3.12	0.5	1.09	0.49	2.06	3.54	4.08	3.3	5.59
Pilrb2	4	0.35	0.72	0.51	0.68	5.15	4.47	3.19	4.39	0.79	1.19	0.37	2.24	4.45	4.68	3.62	4.83
Pim1	4	7.77	7.15	9.12	10.08	33.88	38.12	29.61	25.44	7.99	11.57	7.28	10.46	21.53	23.69	23.84	30.85
Pim3	4	21.31	23.5	25.91	25.53	53.71	42.49	56.25	44.56	35.95	35.85	42.4	37.39	42.44	42.79	48.39	46.81
Pkmyt1	4	2.08	2.84	2.4	2.95	7.06	5.09	6.34	11.73	2.24	2.73	1.8	3.64	3.43	3.38	4.98	9.36
Pla2g7	4	27.4	22.54	36.17	36.35	96.15	82.41	115.64	90.56	61.08	48.41	56.75	63.51	116.5	80.59	118.7	98.52
Plat	4	0.17	0.26	0.16	0.2	0.84	1.35	1.09	8.43	0.11	0.46	0.54	0.51	0.34	0.98	1.79	9.72
Plbd1	4	0.82	0.95	1.19	4.17	48.05	38.87	40.69	95.36	0.3	0.61	0.69	11.5	22.57	21.16	39.31	145.99
Pld4	4	231.29	256.73	242.3	243.88	485.46	544.48	490.79	462.83	276.55	314.94	263.34	244.14	492.1	594.62	505.3	518.38
Plscr1	4	1.05	0.83	1.15	1.36	4.52	4.32	5.53	11.12	0.77	0.75	0.64	7.35	3.14	2.63	4.03	12.79
Plxdc2	4	3.1	3.46	2.3	2.66	3.88	5.39	5.54	5.05	0.65	0.57	0.61	0.51	2.54	2.62	5.37	8.8
Plxnd1	4	2.56	2.28	2.59	4.41	4.85	7.14	4.78	10.71	2.76	5.65	3.02	4.33	8.67	5.12	8.62	12.99
Pmaip1	4	9.9	12.25	9.35	11.35	50.68	51.55	50.26	54.19	10.6	15.7	9.61	11.3	34.84	41.81	48.83	130.39
Pparg	4	0.68	0.59	0.66	0.88	4.85	2.89	3.39	3.74	0.85	0.59	0.64	0.64	2.29	2.04	3.58	3.67
Prdm1	4	0.91	0.93	1.11	1.03	3.77	3.6	2.84	4.07	0.58	0.47	0.8	0.41	2.49	1.95	1.3	1.7
Prelid2	4	8.21	4.96	6.45	5.76	7.77	6.89	9.66	5.48	8.66	5.35	6.59	5.54	13.76	11.55	20.73	21.28
Ptafr	4	32.28	33.94	33.94	30.66	63.68	72.44	68.41	72.27	60.44	57.75	50.69	42.75	62.4	81.37	58.04	69.7
Ptger2	4	0.46	0.38	0.4	0.53	2.7	1.39	4.38	3.14	0.84	0.43	0.3	0.66	3.8	4.63	3.8	6.02
Ptgir	4	0.86	0.88	0.74	0.96	2.91	4.03	3.79	7.03	0.6	1.19	0.77	1.92	3.69	6.13	10.36	12.53
Ptgs2	4	0.78	0.77	0.71	0.89	9.41	8.62	13.26	20.94	0.43	0.5	0.95	0.94	4.38	1.88	5.91	20.34
Pyhin1	4	1.13	0.78	1.81	1.34	10.81	7.64	10.34	9.1	3.31	3.25	3.04	2.95	9.75	7.34	6.53	10.44
Rab11fip1	4	0.21	0.21	0.26	0.41	5.62	4.18	4.33	10.56	0.09	0.14	0.17	0.3	2.48	1.76	4.61	13.87
Rab20	4	20.21	24.12	21.53	33.37	85.72	78.65	66.93	51.22	22.84	25.93	17.86	25.94	44.07	51.71	30.08	16.6
Ramp1	4	2.34	2.68	2.4	1.92	16.83	18.94	14.39	13.76	0.38	0.31	0.74	0.97	6.35	7.06	12.68	18.24
Rasgrp1	4	0.2	0.15	0.32	0.37	1.58	0.96	1.48	2.63	0.31	0.18	0.54	0.24	1.28	1.36	1.69	2.32
Rel	4	16.33	15.57	18.5	20.34	36.99	36.77	29.15	52.85	19.72	29.51	21.68	17.54	21.78	28.23	23.01	63.13
Relt	4	1.42	1.36	2.03	1.61	4.64	3.96	3.32	5.04	3.45	3.84	3.26	3.46	3.9	4.04	5.81	7.65
Rhov	4	1.07	0.88	0.94	1.58	6.76	5.09	5.15	4.99	0.87	1.28	0.98	1.86	1.06	1.39	2.6	2.16
Rilpl2	4	15.9	15.54	17.52	18.43	38.35	44.16	42.51	37.95	17.34	15.44	14.65	18.55	35.52	33.09	33.42	35.04
Rin3	4	1.08	1.22	1.13	1.17	3.12	2.41	2.04	4.81	0.28	0.58	0.63	1.34	2.3	2.05	3.6	7.93
Ripk3	4	3.35	3.85	3.71	4.16	12.07	11.08	9.4	9.94	6.22	7.51	5.96	6.04	8.59	9.53	8.43	10.32
Rnase6	4	4.07	2.38	4.57	3.09	14.16	13.72	14.04	17.87	4.57	5.88	3.62	4.31	16.41	11.59	20	38.61
Rogdi	4	3.3	2.84	3.18	3.25	9.2	8.99	8.15	7.17	3.97	4.15	3.15	4.83	5.6	8.11	5.27	6.36
Rpl13	4	40.98	36.73	41.02	34.89	101.56	96.94	90.55	81.7	51.37	47.74	43.4	56.47	79.86	77.27	75.93	89.43
Rpl17	4	34.9	45.42	40.59	42.86	93.02	98.92	95.29	81.46	52.5	57.83	40.82	62.75	89	84.71	91.29	81.88
Rpl18a	4	25.08	26.94	28.63	24.16	62.97	68.65	60.9	47.38	32.55	34.45	28.61	38.43	51.13	58.82	52.33	45.93
Rpl24	4	9.71	9.27	9.78	9.34	19.12	22.47	22.69	18.42	11.04	12.32	11.29	15.36	21.51	18.25	17.85	19.12
Rpl27a	4	7.47	6.33	7.59	6.24	19.07	19.73	16.65	14.51	7.97	7.61	7.07	9.87	14.93	14.55	14.71	14.11
Rpl32	4	97.59	89.18	94.67	81.99	250.09	259.04	231.15	205.74	111.72	108.44	96.33	144.22	206.99	206.53	210.72	195.67
Rpl35	4	44.62	38.64	37.65	37.74	100.75	108.75	92.81	78.7	58.99	42.32	42.14	57.69	94.42	91.57	93.15	70.54
Rpl35a	4	6.54	5.46	5.26	5.17	13.27	12.68	12.65	11.18	6.15	5.75	5.66	8.17	12.66	11.35	13.18	10.34
Rpl36	4	96.07	95.72	84.07	78.27	226.7	259.3	231.2	180.4	110.86	122.93	87.37	145.35	220.82	238.85	230.31	166.18
Rpl36a	4	4.79	4.16	3.63	4.01	9.8	9.51	9.88	8.68	6.21	4.62	4.36	6.72	9.35	8.31	9.66	9.12
Rpl37	4	64.21	49.81	55.61	47.5	120.28	137.03	136.03	106.42	72.03	63.85	50.18	88.9	98.5	114.3	127.27	91.76
Rpl38	4	21.86	19.66	17.43	17.86	43.84	45.78	43.65	38.86	24.91	21.28	21.95	34.33	44.46	38.74	46.22	34.63
Rpl39	4	11.59	12.07	11.24	12.01	29.95	26.55	27.57	25.59	13.29	11.95	10.67	17.72	25.57	24.46	27.04	22.32
Rps11-ps1	4	3.57	1.46	1.68	1.55	6.06	9.4	5.24	2.39	4.32	5.36	4.21	2.05	6.25	2.85	3.91	3.63
Rps12	4	48.16	40.13	50.52	44.54	108.03	122.45	111.56	83.58	54.83	58.02	46.64	66.41	100.16	96.62	89.78	85.98
Rps14	4	37.66	35.99	33.51	31.52	79.88	84.56	72.53	60.02	43.9	47.91	34.43	51.1	72.36	68.4	67.12	51.66
Rps15a	4	2.51	2.2	2.45	2.23	6.35	5.56	6.53	5.19	2.49	2.59	2.58	3.74	4.69	5.29	5.83	5.31
Rps18	4	13.04	13.59	13.24	12.03	35.32	37.22	33.1	28.69	18	16.07	14.54	19.97	32.56	30.36	31.44	25.46
Rps19	4	12.17	11.94	12.15	10.67	34.49	32.45	30.31	26.32	16.08	13.53	12.42	18.65	26.82	27.78	27.05	23.86
Rps23	4	83.26	70.45	83.52	71.49	184.66	189.1	174.98	155.47	104.01	93.57	86.03	116.91	168.74	157.98	158.05	144.92
Rps24	4	29.18	24.75	29.96	26.11	61.66	54.82	62.31	54.89	34.23	32.95	30.28	39.41	51.88	58.01	60.13	51.89
Rps25	4	17.07	15.28	16.28	15.97	35.43	35.45	34.87	30.71	24.43	18.42	16.59	24.8	32.35	35.73	33.95	29.67
Rps26	4	84.38	55.17	69.86	58.95	147.23	162.99	166.53	132.11	92.29	73.44	74.24	104.71	142.93	152.18	168.51	146.08
Rps27	4	10.3	8.61	9.15	8.83	25.13	32.66	28.4	23.45	13.95	12.4	11.08	14.76	24.19	29.07	29.03	18.37
Rps28	4	14.11	12.05	12.5	10.67	28.27	29.59	32.16	24.04	15.46	12.81	12.4	19.76	25.4	27.38	31.31	24.35
Rps6	4	22.42	21.89	20.93	21.87	50.08	47.05	48.4	45.21	27.55	26.22	26.23	32.21	38.07	38.26	43.65	48.24
Rps7	4	65.75	57.71	64.28	56.11	137.1	137.56	138.51	115.47	76.96	68.82	63.87	91.21	127.23	103	124.34	133.86
Rps9	4	24.19	23.55	25.07	23.08	52.59	49.31	50.09	44.28	32.9	29.19	25.88	37.06	48.19	48.64	47.6	43.77
Rpsa	4	9.49	11.46	10.82	10.52	21.87	24.47	20.85	23.24	12.7	11.18	9.91	11.99	18.62	21.78	21	21.56
Rrad	4	8.8	10.65	11.56	10.54	24.32	28.97	26.04	27.1	13.14	13.18	14.01	10.57	15.59	18.48	14.7	19.94
Rras2	4	1.69	1.55	1.77	1.96	2.18	3.86	3.77	3.98	2.06	1.88	1.89	1.57	4.91	3.31	6.57	9.16
Rtn1	4	0.21	0.26	0.38	0.27	2.5	1.69	1.86	2.91	0.86	1.14	0.82	0.66	1.94	2.1	1.73	2.71
S100a11	4	258.95	209.36	247.14	216.81	626.29	574.17	694.26	856.18	285.68	238.94	278.46	492.74	469.42	362.87	924.97	1339.05
Samsn1	4	4.23	4.01	3.9	4.64	8.64	7.94	7.44	12.21	3.61	3.69	3.54	7.05	7.01	7.76	9.89	22.21
Scand1	4	21.41	19.68	22.07	17.76	43.96	44.45	41.54	33.6	31.08	26.01	25.15	40.85	44.25	37.81	42.56	42.26
Scimp	4	0.79	1.16	1.68	1.01	13.03	17.17	17.6	7.81	1.61	1.5	2.42	1.58	6.74	7.99	13.48	5.56
Sdc1	4	0.42	0.36	0.48	0.49	2.29	3.47	3.67	4.05	0.42	0.96	1.05	0.63	2.83	2.01	6.54	5.32
Sdc4	4	21.5	26.32	28.92	30.31	74	82.23	82.48	78.56	54.48	61.88	56.84	50.35	46.38	57.94	53.39	70.96
Selplg	4	24.64	25.81	23.78	25.4	55.85	57.76	59.36	72.85	36.95	33.9	31.71	31.1	46.53	52.73	60.01	89.05
Sema4d	4	0.25	0.19	0.27	0.72	4.09	4.21	2.98	6.01	0.06	0.12	0.32	0.33	1.04	0.67	0.93	2.55
Shtn1	4	3.68	3.47	3.01	4.06	7.79	8.38	7.45	9.26	3.91	6.76	7.03	6.06	8.96	9.55	9.93	15.23
Slamf7	4	2.13	1.91	3.5	2.09	26.71	29.31	24.33	19.72	6.48	7.13	5.46	3.88	15.54	20.17	18.98	24.48
Slamf8	4	0.27	0.18	0.4	0.27	8.53	12.2	10.79	8.08	1.06	2.09	0.6	0.47	7.01	7.98	8.22	11.83
Slc15a3	4	2.14	2.55	2.4	1.93	6.21	8.09	5.7	4.85	1.95	2.35	1.42	1.58	2.71	3.93	3.36	5.17
Slc16a3	4	3.67	3.62	3.41	4	3.59	3.16	3.16	7.78	0.81	1.3	1.65	2.99	0.99	1.06	4.06	8.78
Slc25a33	4	6.81	5.15	8.46	6.75	10.89	14.75	12.94	13.45	5.37	5.52	7.29	5.22	4.94	9.52	6.82	11.27
Slc27a3	4	0.09	0	0.11	0.17	0.54	0.4	0.48	2.96	0.14	0.12	0.11	0.09	0.44	0.84	2.94	11.99
Slc2a1	4	4.34	3.47	3.89	4.07	10.28	11.71	9.82	14.27	2.16	2.62	3.01	2.39	3.37	3.62	7.34	13.07
Slc7a11	4	0.02	0.04	0.06	0.03	1.2	1.06	1.08	1.89	0.01	0.04	0.01	0.43	0.75	0.31	1.31	1.89
Slc9a4	4	0.99	0.69	0.8	0.55	2.68	3.91	4.18	4.29	0.43	0.89	0.39	0.57	4.88	4.66	7.54	11.11
Slfn1	4	0.59	0.62	0.67	0.66	3.58	6.13	5.79	4.8	1.16	1.23	0.77	6.52	4.83	1.88	5.06	1.6
Smim3	4	13.69	12.61	15.63	12.6	32.31	35.86	30.47	46.45	7.18	6.59	8.62	13.36	13.19	10.82	17.87	34.01
Smim5	4	2.09	3.24	2.01	1.28	2.83	4.2	3.8	5.9	0.09	0.19	0.36	1.95	2.5	1.18	8.12	11.78
Snhg15	4	5.42	5.08	5.2	5.53	19.96	15.77	12.32	13.22	7.24	7.22	5.94	6.29	10.78	9.16	10.46	12.65
Socs1	4	2.49	2.75	3.92	3.92	12.76	15.39	12.14	10.87	4.02	6.75	8.01	7.37	8.25	11.02	12.65	8.95
Socs3	4	71.56	64.62	75.78	84.91	159.97	135.03	133.03	211.52	129.45	161.83	144.41	148.31	177.9	160.49	152.84	176.11
Sowahc	4	7.04	6.82	6.1	6.04	24.58	22.41	21.4	27.82	1.14	2.08	2.5	2.25	8.84	8.72	14.99	35.42
Spaca9	4	0.79	0.95	0.64	0.32	3.11	2.27	3.18	2.84	1.08	1.1	1.06	1.31	2.98	3.03	1.85	2.98
Spic	4	0.4	0.59	0.94	0.73	6.07	4.96	2.11	2.86	1.81	2.06	1.56	1.47	2.31	1.74	0.94	0.59
Spink2	4	0.39	0.74	0.85	0.2	3.57	3.58	5.58	5.4	0.37	0.84	0.89	0.85	1.47	3.15	13.54	12.68
St3gal4	4	4.56	4.74	5.16	4.63	8.83	9.55	9.88	12.56	5.38	6.13	5.15	5.25	11.3	12.12	11.5	20.98
St3gal5	4	22.1	19.37	15.79	19.48	10.64	10.63	9.58	17.74	2.6	1.98	2.1	7.9	10.65	9.65	15.32	37.13
St8sia6	4	0.37	0.07	0.22	0.23	2.1	3.3	2.71	2.27	0.05	0.23	0.14	0.19	1.11	1.38	0.95	2.97
Stap1	4	0.6	0.7	0.83	1.18	5.45	4.31	5.35	6.18	0.7	0.78	0.85	1.56	3.42	3.45	3.73	8.61
Stk10	4	9.32	10.14	6.85	10.21	10.44	10.91	7	19.98	2.8	4.9	5.31	4.74	5.75	7.45	8.99	19.18
Stmn1	4	15.8	23.6	17.38	17.31	40.94	42.92	36.51	44.32	13.01	21.38	12.28	23.51	22.84	26.81	28.95	35.65
Sub1	4	39.96	30.62	38.79	37.27	73.6	77.68	76.13	71.9	52.7	44.95	47.05	59.73	64.01	66.62	79.46	96.07
Syngr2	4	42.64	38.42	41.05	37.39	65.45	60.25	61.19	77.05	28.31	25.64	25.78	31.15	36.75	38.51	52.95	118.8
Thbs1	4	2.68	2.31	3.52	20.96	70.05	34.32	49.02	137.68	0.95	2.03	0.8	30.4	16.4	9.08	18.45	32.05
Ticam1	4	4.86	5.65	6.63	4.83	12.64	12.37	12.2	11.33	7.27	10	8.5	5.36	7.79	6.87	8.55	8.34
Timp1	4	1.06	0.94	1.73	3.29	8.08	4.74	9.6	10.83	4.65	1.48	2.72	7.44	7.35	3.89	13.66	16.48
Tk1	4	1.97	3	2.09	2.43	6.18	5.23	3.47	4.6	1.02	1.72	0.9	2.28	2.65	1.88	2.36	3.82
Tle1	4	1.31	1.46	1.37	1.29	2.05	1.99	1.78	2.39	0.55	0.69	0.4	0.45	0.63	0.91	0.95	1.81
Tlr1	4	4.36	3.44	5.45	4.35	12.54	10.56	10.45	8.1	6.15	2.86	4.26	3.55	7.93	7.68	7.55	3.06
Tlr11	4	0.14	0.09	0.09	0	0.49	0.74	0.54	0.42	0.55	0.27	0.23	0.12	0.67	0.8	0.97	2.39
Tmem119	4	4.09	4.94	6.76	5.66	18.12	12.22	14.85	9.98	1.06	1.5	1.46	2.36	2.79	1.97	2.94	2.36
Tmem154	4	1.58	1.06	1.78	1.72	4.6	2.75	4.97	5.32	0.53	0.38	0.87	1.85	3.19	3.46	8.79	13.12
Tmem176a	4	6.63	7.75	6.87	6.17	35.78	48.02	34.99	31.94	9.76	8.35	7.09	6.39	26.46	33.66	27.49	38.84
Tmem176b	4	27.65	28.42	27.4	24.33	71.55	80.98	67.05	59.98	26.58	25.66	21.56	18.88	54.97	63.65	57.74	61.57
Tmem51	4	3.43	1.54	3.28	4.77	19.82	14.49	11.57	23.09	0.43	0.84	0.06	1.43	9.83	7.59	12.81	21.52
Tmem88	4	0.77	0.88	1.22	2.09	6.86	5.14	5.02	5.8	1.3	2.22	2.25	1.84	5.63	4	4.07	6.98
Tmsb10	4	2.98	2.1	2.81	2.54	14.18	13.77	14.69	20.7	2.02	2.46	2.44	5.3	12.17	12.59	24.25	21.05
Tnf	4	74.59	84.64	84.21	83.19	168.86	217.21	166.35	149.86	113.08	133.51	102.12	100.21	109.44	162.44	119.97	91.12
Tnfaip3	4	12.52	15.78	13.23	16.79	42.2	40.49	32.64	58.93	14.92	18.32	19.33	15.66	27.6	29.85	32.5	60.39
Tnfaip8l1	4	1.53	1.07	1.2	1.6	3.24	4.14	3.29	4.95	2.54	2.85	2.1	1.74	2.23	4.42	3.3	7.3
Tnfsf14	4	0.13	0.37	0.86	0.59	12.04	15.46	9.37	12.93	0.55	0.78	0.42	0.92	6.73	5.53	5.15	5.81
Tnfsf9	4	84.21	108.53	95.72	115.38	497.83	593.51	481.36	575.57	144.44	188.58	141.94	148.36	251.27	306.83	317.46	534.62
Tnip3	4	0.93	1.11	1.02	1.17	28.47	24.34	23.19	33.84	0.35	0.82	0.71	0.89	10.75	7.96	21.33	52.35
Tnmd	4	0.81	1.37	1.01	2.72	2.13	3.98	6.4	4.36	1.77	0.9	0.74	3.41	2.04	0.5	3.49	3.14
Traf1	4	0.36	0.43	0.58	0.69	7.81	6.16	6.05	12.22	0.47	0.81	0.61	0.48	3.09	2.9	4.75	15.78
Trem1	4	0.19	0.23	0.58	1.96	3.1	1.81	3.37	12.01	0.25	0.05	0.33	5.54	1.17	0.69	3.38	10.36
Trim25	4	4.53	4.3	5.36	7.02	12.42	11.12	10.88	13.17	4.58	6.51	7.16	7.19	11.47	9.67	12.64	14.92
Tspan13	4	6.3	6.42	8.08	7.44	12.33	20.37	13.69	24.3	6.45	7	6.99	7.13	6.37	2.7	6.8	28.04
Ttc39c	4	0.97	0.56	0.88	0.98	3.6	4.03	4.81	4.45	0.58	0.62	0.93	0.84	4.05	4.06	4.89	5.13
Uck2	4	0.14	0.09	0.14	0.29	2.49	2.52	2.13	4.77	0.19	0.05	0.01	0.55	1.07	0.88	1.78	4.03
Unc119	4	2	2.11	1.8	2.1	2.03	3.34	3.23	4.97	2.25	2.1	1.53	2.47	4.78	3.85	5.76	9.3
Usp18	4	3.32	4.06	4.02	4.36	12.27	11.42	10.78	5.22	5.67	6.12	4.26	5.05	9.94	6.38	6.7	4.58
Vcam1	4	1.14	1.23	0.46	0.92	11.18	6.81	2.87	5.95	0.37	0.36	0.47	0.95	1.04	0.79	1.08	0.72
Vegfa	4	0.17	0.14	0.24	0.34	2.06	1.35	1.84	2.81	0.03	0.06	0.11	0.46	0.7	0.46	1.85	1.84
Vhl	4	10.06	10.96	8	9.87	9.73	13.88	9.83	14.56	6.22	5.13	5.3	5.24	6.46	6.17	9.2	14.18
Wnt11	4	0.14	0.08	0.16	0.3	3.81	3.39	4.59	26.32	0.1	0.07	0.1	0.62	0.96	0.94	5.49	44.7
Ybx3	4	0.83	1.73	1.44	6.47	2.08	7.51	5.45	14.2	9.79	4.05	2.63	6.1	12.65	3.86	15.63	6.37
Zbp1	4	1.81	1.01	1.65	1.15	6.37	3.99	5.34	3.48	1.05	1.17	0.97	1.32	6.04	4.1	3.19	3.04
Zbtb32	4	0.45	0.43	0.53	0.34	0.33	1.55	1.55	4.84	0.82	0.34	0.59	0.3	1.68	0.25	4.36	8.45
Zc3h12a	4	8.28	8.58	8.51	12.78	24.56	22.72	19.78	29.04	3.64	14.08	14.56	14.1	18.09	18.86	22.94	27.97
Zfp263	4	2.13	2.77	2.41	2.53	6.75	5.55	4.94	6.73	2.83	2.42	3.01	2.29	3.78	3.38	3.72	5.71
Zswim7	4	2.15	4.59	7.16	4.52	12.15	9.68	11.5	10.06	8.41	5.13	5.61	7.31	9.55	7.56	9.76	9.42
Zyx	4	13.72	14.48	15.57	15.92	16.48	17.85	18.86	30.48	16.36	21.36	22.65	21.88	18.52	19.7	36.06	55.82

## Sheet: Sheet2
Cluster 1	Cluster 2	Cluster 3	Cluster 4	Background
1810034E14Rik	1700006J14Rik	1700017B05Rik	1700025G04Rik	Gene_Symbol
2410004P03Rik	2410006H16Rik	1810011O10Rik	2810417H13Rik	H2-Eb1
A4galt	3300005D01Rik	2010111I01Rik	4930455G09Rik	H2-Aa
Adamts14	A930006K02Rik	2510009E07Rik	4930523C07Rik	Cd74
Adgrg1	Acpp	2810025M15Rik	5330406M23Rik	H2-Ab1
Akr1b8	Acy3	3110082I17Rik	A530064D06Rik	Vsig4
Aqp1	Ankrd66	4930486L24Rik	AA467197	Ngp
Arl4d	Arhgap18	4932438H23Rik	AB124611	Camp
Asns	Atp6v0d2	A630033H20Rik	Abca6	S100a9
B3gnt9	Bank1	A930011G23Rik	Abcg3	S100a8
Bambi-ps1	Bcam	Abcc3	Acod1	S100b
Bcl6b	Btg2	Abcd4	Acot7	Retnla
C2	C1qtnf1	Abhd15	Acta2	Ltf
C3	Ccl12	Acap3	Adam8	Il1b
C4b	Ccl2	Actn1	Adgre4	Olfml3
C77080	Ccl24	Adam15	Adora2b	Clec4b1
Camp	Ccl4	Adam33	Adrbk2	Lcn2
Cdk15	Ccl7	Adam9	Ahcyl2	Cx3cr1
Cdr2	Ccl8	Adamtsl5	Ahr	Bcl2a1d
Chil3	Cd163	Adcy3	AI504432	Mgl2
Cma1	Cd1d1	Adgre5	Aif1	H2-DMb1
Coro2b	Cd209b	Afap1l1	Aim1	Chil3
Cpa3	Cd209d	Agmo	Ak8	Ctla2a
Crip2	Cd209e	Ahnak2	Alcam	Pald1
Ctgf	Cd209f	AI427809	Amz1	Ltb4r1
Ctsk	Cd209g	Ak1	Anxa8	Ccr2
Cxcr3	Cd300ld2	Amotl1	Aph1c	Plbd1
Cxx1b	Cd300ld3	Angptl2	Areg	H2-DMa
Cyr61	Cd38	Ankrd28	Arg1	Flrt3
Ednrb	Cebpb	Anxa3	Arhgap26	Cd52
Egfr	Cebpd	Aplp1	Arl5c	Mmp9
Enho	Cfd	Apold1	Atp1a3	1810011O10Rik
Enpep	Cfp	Arhgap22	Atp8b4	Tnip3
F13a1	Chp2	Arhgap23	Avpi1	Cd209a
F830016B08Rik	Chrna5	Arhgef3	AW112010	Syngr1
Fam101b	Clec10a	Arl11	Axl	Cd24a
Fam109a	Clec4a1	Armc5	B4galnt1	Pmepa1
Fcgrt	Clec4a3	Arpin	Basp1	Cspg4
Fgfr1	Clec4n	Arsb	Batf	Bcl2a1b
Fosl1	Cxcl12	Asb10	Batf3	Ch25h
Fxyd2	Cyp27a1	Atp2a3	BC064078	Itgb5
Gatm	D730003I15Rik	AU020206	Bcl2a1b	Tpbgl
Gca	Diras2	B3galnt1	Bcl2a1d	Ecscr
Gdpd1	Dok2	B3gnt3	Bcl2l11	Sox4
Gimap6	Dpt	B3gnt8	Bcl3	Lrrc34
Gja1	Egr1	B4galt1	Bfsp1	Cytip
Gm15912	Egr2	B4galt7	Bin2	Wnt11
Gm4951	Fcgr2b	B4gat1	Birc3	Emb
Gpr146	Fh1	Bach2os	Birc5	Olfm1
Gsr	Fos	Bag5	Bri3bp	Tmem51
Hdc	Foxred2	BC100451	Btg1	Hexb
Hmgb2	G530011O06Rik	Bcl2	Capsl	Havcr2
Hp	Gadd45g	Bhlhe40	Ccdc109b	Areg
Ifi27l2a	Gas7	Bhlhe41	Ccdc69	Cd209d
Ifitm6	Gbp3	Bin1	Ccdc88b	Ramp1
Itga9	Gfra2	Bmp2	Ccl6	Aqp1
Kcnk5	Gm10382	Bok	Ccl9	Slc9a3r2
Lbx1	Gm12902	Btnl2	Ccnd2	Il10
Lcn2	Gm13919	C130050O18Rik	Ccr2	Ms4a4c
Lrg1	Gm15726	Calcrl	Ccrl2	Itgax
Ltf	Gm23935	Camk1	Cd14	Napsa
Mcpt4	Gm4955	Camk2d	Cd2	Cd2
Ms4a4a	Gm5617	Capn5	Cd209a	F11r
Mturn	Gm8113	Cbr2	Cd209c	Olr1
Ngp	Gm8818	Cbr3	Cd244	Itgb7
NoGeneName	Gm9949	Ccr1l1	Cd24a	Il1r2
Npl	Gprc5c	Ccr5	Cd274	H2-DMb2
Nxpe5	Gstp1	Cd109	Cd300ld	NoGeneName
Pkp4	Gstp2	Cd200r4	Cd52	Mefv
Plac8	Hbegf	Cd276	Cd69	Cyr61
Plekhf1	Ifi47	Cd300c2	Cd72	2510009E07Rik
Plet1	Ifit1	Cd33	Cd74	Tnfsf14
Ppic	Ifit3	Cd9	Cd79b	Cd276
Prkar2b	Ifitm3	Cdc25b	Cd93	Cd209f
Ptk2	Igfbp4	Cdk18	Cdc42ep2	Thbs1
Ptrf	Ighd	Cdkn2c	Cdk2ap2	Ccl6
Rdh12	Ighm	Cebpzos	Cdkn1a	Lyz1
Rnasel	Isg15	Cfh	Cep85	Tgm2
S100a8	Jun	Ch25h	Chad	Cxcl13
S100a9	Kcng2	Chd9	Chn2	Krt80
Selenbp1	Kmo	Chek2	Cish	Slamf8
Serpinb1a	Lifr	Cipc	Ckap2l	Fabp3
Slc10a6	Lpar1	Clec5a	Cks1b	Sowahc
Slc35g1	Lum	Clstn1	Cks2	Clec4e
Slc40a1	Mamdc2	Cmah	Clec12a	Cd209g
Slfn4	Marco	Cndp1	Clec2i	Ptgs2
Sorl1	Mcoln2	Cnrip1	Clec4a2	Il1a
Stac2	Mmp9	Col14a1	Clec4b1	Arl5c
Steap4	Mrps6	Colec12	Clec4e	Adam8
Stk19-ps1	Ms4a8a	Cpd	Clec7a	Cyp4f18
Tfrc	Mt1	Cpne8	Coro1a	Dusp5
Tmod1	Mt2	Cry2	Coro2a	Fermt2
Tppp	Myl9	Cryba4	Csf2rb	Arsb
Trnp1	NoGeneName	Cspg4	Csf3	Slamf7
Tubb4a	NoGeneName	Ctla2a	Csrnp1	Cd109
Txnip	NoGeneName	Ctla2b	Ctsh	Lyve1
	NoGeneName	Ctsd	Cxcl1	Il7r
	Nt5dc2	Ctsf	Cxcl10	Fn1
	Oasl1	Cx3cr1	Cxcl13	Lhfpl2
	P3h2	Cxcl14	Cxcl16	Slc2a6
	Pcolce	Cxxc5	Cxcl2	Axl
	Pf4	Cyth3	Cxcl3	Spp1
	Pla2g2d	D8Ertd82e	Cxcr4	Ccrl2
	Plvap	Dbp	Cyp2s1	Glipr2
	Ppbp	Dnajc18	Cyp4f18	Lst1
	Ptgs1	Dnm1	Cysltr1	Gpr132
	Ralgds	Dock4	Cytip	Ctla2b
	Rem1	Dok3	D930030I03Rik	Mtus1
	Retnla	Dok4	Depdc7	Scimp
	Rgl1	Dpysl3	Dhrs9	Hp
	Rn7sk	Dtx3	Dppa3	Ctsd
	Rnd3	Dtx4	Dusp1	Mpeg1
	Rpl37a	Ecm1	Dusp2	Gfra2
	Rpl41	Ecscr	Dusp5	Hbb-bs
	Rps29	Eef2k	Dut	Dusp2
	Rsad2	Eif2ak3	E230016K23Rik	Adgre4
	Sde2	Elmo1	E2f2	Sparc
	Sema4a	Emilin1	Ebi3	Csf3
	Sertad1	Endod1	Emb	Il21r
	Siglech	Enpp1	Erdr1	Ctgf
	Slc14a1	Enpp4	Errfi1	Clec7a
	Slc7a13	Epb41l2	Etv3	Kcnq1
	Smim24	Ephb6	Eva1b	Gpr141
	St3gal6	Ets1	Ezr	Hbb-bt
	Timd4	Eya4	F10	Tmem86a
	Tlr5	F11r	Fabp4	Batf3
	Tmem8	Fabp3	Fabp5	Hba-a1
	Tnfrsf17	Fam105a	Fam107b	Colec12
	Tpsb2	Fam126a	Fam129a	Hba-a2
	Trf	Fam167b	Fam26f	Basp1
	Tslp	Fam20a	Fcgr4	Fabp5
	Tspan32	Fam20c	Fcrls	Htra3
	Ugcg	Fam3c	Fem1c	Gm8113
	Zfp36	Fam46c	Ffar4	AW112010
	Zfp36l1	Fam53b	Fgl2	Rab11fip1
	Zfp948	Fbln5	Fgr	Nfil3
		Fchsd2	Flrt3	Gdpd5
		Fcna	Flt3	Mxra8
		Fer	Gadd45b	Kcna3
		Fermt2	Gapt	Traf1
		Fez2	Gbp9	Gja1
		Fkbp14	Gda	Gmpr
		Fkbp9	Glipr1	Enpep
		Fmn1	Glipr2	Naaa
		Fmnl3	Glrx	Tmem119
		Fn1	Gm12840	Il6
		Folr2	Gm13391	Spink2
		Galc	Gm13710	Cxcl10
		Gas6	Gm14548	Pmaip1
		Gde1	Gm14636	Cd209b
		Gdpd5	Gm15445	Lpcat2
		Ggta1	Gm15832	Fbln5
		Gm10605	Gm16712	Neurl3
		Gm15539	Gm17056	Ctsk
		Gm16104	Gm1966	Ebi3
		Gm26863	Gm2000	Ifitm3
		Gm5834	Gm20400	Lair1
		Gmpr	Gm20703	Ifitm6
		Gna15	Gm26780	Gstp1
		Gns	Gm26809	Golm1
		Golm1	Gm26880	Bcam
		Gpr137b	Gm26885	Tnfsf9
		Gpr183	Gm29336	Scml4
		Gpr34	Gm29408	Cd209e
		Gpt2	Gm2a	Gm37787
		Gramd3	Gm36933	C1qtnf1
		Grn	Gm37033	Tmsb10
		Gtf2h2	Gm37787	Fgr
		Gyg	Gm38062	Slc9a4
		Gypc	Gm4149	Pls3
		Havcr2	Gm4604	Fam167b
		Hes1	Gngt2	Ms4a8a
		Hexb	Got1	Tlr13
		Hgf	Gpnmb	AU020206
		Hgsnat	Gpr132	Timp2
		Hpgd	Gpr141	Vcam1
		Hpgds	Gpr35	Rnase6
		Hpse	Gpr65	Nlrc3
		Htra3	Gpr68	Cxcl2
		Hvcn1	Gpr84	Lpl
		Hyal2	Gprc5a	Clec10a
		Ifitm10	Gramd4	Ptgir
		Il17ra	Grasp	Enpp1
		Il21r	H2-Aa	Tmem176a
		Inpp5d	H2-Ab1	Lrg1
		Ip6k3	H2-DMa	Mmp19
		Irf2bpl	H2-DMb1	Cd79b
		Itga6	H2-DMb2	Gm20400
		Itgav	H2-Eb1	Cxxc5
		Itgb5	H2-Q5	Ip6k3
		Kank2	H2-Q6	Ldhb
		Kdelc2	H2-Q7	Cfp
		Kif13b	H2afz	Ppbp
		Kif3c	Hba-a1	2010111I01Rik
		Kifc3	Hba-a2	Gm1966
		Klc4	Hbb-bs	Rtn4rl1
		Klf9	Hbb-bt	Ndnf
		Klhl21	Hcar2	Pilra
		Klhl6	Hilpda	Ighm
		Lair1	Hist1h1b	Cxcl3
		Lamb2	Hist1h2ae	Gypc
		Laptm4b	Hist1h2ap	4930455G09Rik
		Layn	Hist1h4d	Sh3bgrl2
		Ldhb	Hlcs	Plxdc1
		Lefty1	Hmga1	Hpgds
		Lgals9	Hr	Hist1h2ap
		Lgalsl	Hsp90aa1	Scoc
		Lhfpl2	Ibsp	Sh3bp5
		Lpar6	Icam1	Aim1
		Lpcat2	Icosl	Il1rn
		Lrp1	Id2	Map4k1
		Lrrc34	Id3	Pyhin1
		Lrrc75a	Ifitm1	Slc27a3
		Ltc4s	Ifrd1	Padi2
		Lyve1	Il10	Fmnl3
		Lzts2	Il18rap	B3gnt3
		Maoa	Il1a	Phlda1
		Mapk11	Il1b	Dhrs9
		Mcts2	Il1r2	Gstp2
		Med22	Il1rl1	Tmod1
		Mef2a	Il1rl2	Ccl12
		Meis3	Il1rn	Fcgr4
		Mertk	Il2rg	Sema4d
		Mfge8	Il6	Lmo1
		Mfng	Il7r	Adamtsl5
		Mfsd6	Irf4	P2ry13
		Mgst1	Irf7	Tmem246
		Mill2	Itga1	Batf
		Mmp14	Itgal	Cpne8
		Mmp2	Itgax	St3gal5
		Mob2	Itgb7	Fcrls
		Mocos	Itpkb	Nlrp3
		Mpzl1	Jdp2	S1pr1
		Mr1	Kcna3	Tgfbr1
		Mrgpre	Kcnn4	Atp2a3
		Ms4a14	Kcnq1	Raet1d
		Msrb2	Kdm6b	Irf4
		Mtus1	Krt80	Tmem154
		Mxra8	Lgals3	Ibsp
		Myo1e	Lilra5	Pdpn
		Myo1f	Lilra6	H2-Q6
		Myo7a	Lmnb1	Ltc4s
		Nacc2	Lmo1	Ccr5
		Naglu	Lpl	Smim5
		Ncf1	Lrrc32	Slmo1
		Nck2	Lsm7	E230016K23Rik
		Nedd9	Lsp1	Akr1b8
		Nek6	Lsr	Mt2
		Neo1	Lst1	Timp1
		Nfic	Ltb4r1	Ednrb
		Nid2	Ly9	BC064078
		Ninl	Lyz1	Pla2g2d
		Nlrc3	Maff	Gm14548
		NoGeneName	Malt1	Scn1b
		NoGeneName	Map4k1	Hes1
		NoGeneName	Marcksl1	Pdlim7
		NoGeneName	Matk	Slc46a1
		NoGeneName	Mcm5	Pyroxd2
		Nr1d1	Me2	Ctsh
		Nr1h3	Mefv	Hist1h1b
		Nradd	Mgl2	Itga6
		Ntpcr	Mir142hg	Mmp2
		Nupr1	Mir155hg	Ptprm
		Olfml3	Mmp13	Tppp
		Olr1	Mmp19	Fkbp9
		Ophn1	Mpeg1	Lrrc75a
		Optn	Mpp6	Errfi1
		P2rx7	Mrpl52	C130050O18Rik
		P2ry12	Ms4a4c	Ptger2
		P2ry13	Msrb3	Rgs7bp
		Pacs1	mt-Tp	Diras2
		Pald1	Mthfd2	Cd300c2
		Palm	Mxd1	Ffar4
		Pbxip1	Naaa	Acta2
		Pde3b	Napsa	Isg15
		Pdgfb	Ndc80	Myo1e
		Pdgfc	Ndnf	Ccl24
		Pdlim7	Ndrg1	Aif1
		Pdpn	Net1	Plxdc2
		Phlda3	Neurl3	Smim3
		Phtf2	Nfil3	Ccl4
		Pik3r2	Nfkbia	Itgav
		Pik3r5	Nfkbib	Atp6v0d2
		Pla2g15	Nfkbid	Chrna5
		Pla2g16	Nfkbie	Slfn1
		Plcb3	Nlrp10	Uaca
		Plcd1	Nlrp3	Sgcb
		Plekhb2	Noct	Fam46c
		Plekhg5	NoGeneName	Abcc3
		Plekhh3	NoGeneName	Slc10a6
		Plekhm1	NoGeneName	Pde4b
		Plod1	NoGeneName	C4b
		Plpp1	NoGeneName	NoGeneName
		Pls3	NoGeneName	Cxcl1
		Plscr4	NoGeneName	Marcksl1
		Plxdc1	NoGeneName	Pilrb1
		Plxna4	NoGeneName	Kank2
		Plxnb2	NoGeneName	Gpr34
		Pmepa1	Nr4a2	Depdc7
		Pmp22	Nr4a3	Sdc1
		Pnpla7	Oaf	Cry2
		Pomk	Odc1	Sulf2
		Ppargc1b	Olfm1	Gm15912
		Ppm1f	Padi2	Hbegf
		Ppp1r3b	Parvg	Rasgrp3
		Pqlc2	Pde4b	Scd2
		Prkcb	Phf11a	Clec4a2
		Prkcdbp	Phf11b	Arhgap22
		Prnp	Phlda1	Eya4
		Pros1	Pilra	Flt3
		Prune2	Pilrb1	Stac2
		Ptprm	Pilrb2	Oasl1
		Pwwp2b	Pim1	Slc2a1
		Pxdc1	Pim3	Afap1l1
		Pyroxd2	Pkmyt1	Plscr1
		Rab31	Pla2g7	Plat
		Rab32	Plat	A530064D06Rik
		Rab34	Plbd1	Ak8
		Raet1d	Pld4	Sgk1
		Rai14	Plscr1	Cd38
		Rapgef5	Plxdc2	Trem1
		Rasa1	Plxnd1	Msrb2
		Rasgrp3	Pmaip1	Clec4a1
		Rbbp9	Pparg	Mmp13
		Rcan1	Prdm1	Lsr
		Rcan3	Prelid2	Slco2b1
		Rftn1	Ptafr	Ccl2
		Rgmb	Ptger2	F13a1
		Rgs1	Ptgir	Usp2
		Rgs7bp	Ptgs2	Stap1
		Rhoj	Pyhin1	Gpnmb
		Rhoq	Rab11fip1	Pilrb2
		Rilpl1	Rab20	Pim1
		Rin2	Ramp1	Ccl7
		Rnase4	Rasgrp1	Mpp6
		Rnf128	Rel	Mxd1
		Rnf180	Relt	Pomk
		Rprd1a	Rhov	Uck2
		Rps4l	Rilpl2	Thsd1
		Rtn4rl1	Rin3	Plvap
		Rubcn	Ripk3	Clec12a
		S100b	Rnase6	Abcg3
		S1pr1	Rogdi	Hist1h4d
		Sccpdh	Rpl13	Srgn
		Scd2	Rpl17	Mir155hg
		Scml4	Rpl18a	Kmo
		Scn1b	Rpl24	Gm29408
		Scoc	Rpl27a	Cd14
		Sec14l1	Rpl32	Mturn
		Selm	Rpl35	NoGeneName
		Sephs2	Rpl35a	AB124611
		Serpinb6a	Rpl36	Fam26f
		Serpine1	Rpl36a	Prkar2b
		Serpinh1	Rpl37	Malt1
		Sesn1	Rpl38	Maff
		Sgcb	Rpl39	Rhoj
		Sgk1	Rps11-ps1	Rnd3
		Sh3bgrl2	Rps12	S100a11
		Sh3bp5	Rps14	Rilpl1
		Ski	Rps15a	Pla2g7
		Skil	Rps18	Fxyd2
		Sla	Rps19	NoGeneName
		Slc12a7	Rps23	Cdk2ap2
		Slc17a5	Rps24	Atp8b4
		Slc18b1	Rps25	AI504432
		Slc27a1	Rps26	Spats2
		Slc2a6	Rps27	Zbtb32
		Slc35e3	Rps28	Cd244
		Slc46a1	Rps6	Gprc5c
		Slc6a6	Rps7	Galc
		Slc9a3r2	Rps9	Bmp2
		Slco2b1	Rpsa	Tmem37
		Slmo1	Rrad	Clec2i
		Smagp	Rras2	Socs1
		Smpdl3a	Rtn1	Camk1
		Snta1	S100a11	Adora2b
		Snx32	Samsn1	Gpr35
		Sorbs3	Scand1	Me2
		Sox4	Scimp	Rapgef5
		Sparc	Sdc1	Clec5a
		Spats2	Sdc4	Cd200r4
		Spire1	Selplg	A4galt
		Spns2	Sema4d	Lzts2
		Spp1	Shtn1	Pbxip1
		Spsb1	Slamf7	Cks2
		Srgn	Slamf8	Hilpda
		St3gal2	Slc15a3	Oaf
		Stab1	Slc16a3	Ttc39c
		Stard8	Slc25a33	Gimap6
		Sulf2	Slc27a3	F10
		Syngr1	Slc2a1	Coro2a
		Tagap	Slc7a11	Emilin1
		Tbc1d12	Slc9a4	Pdgfc
		Tbc1d2	Slfn1	Cfh
		Tcn2	Smim3	Gm16104
		Tef	Smim5	Cd1d1
		Tfec	Snhg15	Apold1
		Tgfbr1	Socs1	Gatm
		Tgfbr2	Socs3	Cd93
		Tgm2	Sowahc	Slc40a1
		Thbs2	Spaca9	Maoa
		Thsd1	Spic	Anxa3
		Tifab	Spink2	Kdm6b
		Timp2	St3gal4	Fgl2
		Tlr13	St3gal5	Gngt2
		Tmbim1	St8sia6	St8sia6
		Tmem144	Stap1	Tns2
		Tmem204	Stk10	Ccnd2
		Tmem206	Stmn1	Cd9
		Tmem221	Sub1	Nt5dc2
		Tmem246	Syngr2	Mt1
		Tmem37	Thbs1	Cdk18
		Tmem38b	Ticam1	Prnp
		Tmem41a	Timp1	Ccl9
		Tmem63a	Tk1	P3h2
		Tmem86a	Tle1	Rhov
		Tmx4	Tlr1	Nr4a2
		Tnfrsf21	Tlr11	Kdelc2
		Tnfsf8	Tmem119	AA467197
		Tns1	Tmem154	Fabp4
		Tns2	Tmem176a	Gm13710
		Tor4a	Tmem176b	Neo1
		Tpbgl	Tmem51	Icosl
		Trem2	Tmem88	Slc27a1
		Trim35	Tmsb10	G530011O06Rik
		Trim47	Tnf	Mapk11
		Trove2	Tnfaip3	Cdk15
		Trp53inp2	Tnfaip8l1	Ccl8
		Trpv4	Tnfsf14	Amz1
		Tsc2	Tnfsf9	Lamb2
		Tshz3	Tnip3	Sorbs3
		Tspan14	Tnmd	Il2rg
		Ttyh2	Traf1	Cxcr3
		Uaca	Trem1	4930486L24Rik
		Ube2g2	Trim25	Serpinh1
		Uchl3	Tspan13	Spic
		Umps	Ttc39c	Lsp1
		Usp2	Uck2	Snta1
		Vcan	Unc119	Pla2g16
		Vsig4	Usp18	Gm2a
		Wdr6	Vcam1	Tmem88
		Xdh	Vegfa	Spsb1
		Xrcc5	Vhl	Serpinb6a
		Xxylt1	Wnt11	Gas6
		Ykt6	Ybx3	Ptrf
		Zbed3	Zbp1	Cpd
		Zdhhc14	Zbtb32	Gm4149
		Zfp472	Zc3h12a	Rab20
			Zfp263	Tnfrsf21
			Zswim7	Bhlhe40
			Zyx	Atp1a3
				Stard8
				Nid2
				Arl4d
				Ybx3
				Tmem176b
				Arhgef3
				Mrgpre
				Cd163
				Prdm1
				Gm5834
				Plet1
				Rin3
				Lilra6
				Il1rl1
				Calcrl
				Spire1
				Gadd45b
				Cxcl16
				Bach2os
				Sdc4
				Cnrip1
				Gm13919
				Ggta1
				Jdp2
				Phtf2
				Acpp
				Abcd4
				Arpin
				Itga1
				Dpysl3
				Gpr84
				Dock4
				Endod1
				Trp53inp2
				Tnfaip3
				Fer
				Glipr1
				Cd209c
				Acod1
				Mmp14
				B4galt7
				Slc17a5
				Gm26863
				Ctsf
				Capsl
				Vcan
				1700025G04Rik
				Fosl1
				Rn7sk
				Pparg
				Rnf180
				Cxcl12
				Hvcn1
				Stab1
				Slc14a1
				Layn
				Kif3c
				Ahnak2
				Ms4a4a
				NoGeneName
				Dnm1
				Rftn1
				Rem1
				Tspan32
				Ttyh2
				Rps27
				Mef2a
				Csrnp1
				Klhl6
				Epb41l2
				Plekhg5
				Bcl6b
				Umps
				2410004P03Rik
				Pf4
				Nfkbie
				C2
				Nfic
				Adrbk2
				Plpp1
				Dok3
				Anxa8
				Serpinb1a
				Cd69
				Rab31
				Phf11a
				Erdr1
				Tnfrsf17
				Id3
				Nradd
				Rai14
				Adgrg1
				Zbp1
				Elmo1
				Dnajc18
				Gca
				Tagap
				Lifr
				Rps4l
				B3galnt1
				Gpr65
				Cdc42ep2
				Pxdc1
				Ninl
				Rdh12
				A930006K02Rik
				Mfsd6
				Gapt
				Mfng
				Kcnn4
				D8Ertd82e
				Hgsnat
				Naglu
				Trem2
				Klhl21
				Clec4a3
				Coro2b
				Phf11b
				Fcna
				Rpl37a
				Myl9
				Odc1
				Shtn1
				H2-Q7
				Selenbp1
				Plac8
				Arg1
				Ndrg1
				Bcl3
				Net1
				Eva1b
				St3gal4
				Etv3
				Gpr137b
				Vegfa
				Rab34
				Plcd1
				Snhg15
				Angptl2
				Zfp36
				Gm10605
				Rpl32
				2810417H13Rik
				Tmem144
				Fam129a
				NoGeneName
				NoGeneName
				2810025M15Rik
				Id2
				Tifab
				Gm17056
				Ifit3
				Sema4a
				Foxred2
				B3gnt9
				Ophn1
				NoGeneName
				Plekhm1
				Phlda3
				Cd300ld2
				Abca6
				Slc15a3
				Rras2
				Rnf128
				Tef
				Il18rap
				Dppa3
				Grasp
				Tslp
				4930523C07Rik
				Ets1
				Rtn1
				Fam3c
				Lefty1
				Eef2k
				Gm36933
				Rpl36
				Rcan1
				Chad
				Enho
				Rps19
				Camk2d
				Marco
				Tns1
				Sccpdh
				Gm4604
				Hpse
				Lbx1
				Plxnd1
				Prune2
				Ykt6
				Dok2
				Lilra5
				BC100451
				Ptgs1
				Nr4a3
				Rps18
				Mocos
				Dusp1
				1700006J14Rik
				Gm8818
				Lmnb1
				Pacs1
				Pros1
				Slc12a7
				Cmah
				Rin2
				Laptm4b
				Cdr2
				Gde1
				Samsn1
				Cpa3
				Gm4951
				Egr2
				Mamdc2
				Relt
				Mpzl1
				Rnase4
				Ripk3
				Selplg
				Plod1
				Fam20a
				Agmo
				Ccdc109b
				Prelid2
				Csf2rb
				Rrad
				Fam101b
				Bin2
				Adgre5
				Bri3bp
				Icam1
				Tmem221
				Gm15726
				Cd274
				Snx32
				Adamts14
				Cxcr4
				Stk10
				Capn5
				Gm26780
				Fgfr1
				Slfn4
				Pkmyt1
				Slc6a6
				Tfrc
				H2-Q5
				P2ry12
				Gm16712
				Plxna4
				Parvg
				Slc35g1
				NoGeneName
				Pde3b
				Rilpl2
				Zbed3
				AI427809
				Gpr183
				Lgals3
				Steap4
				Rpl13
				NoGeneName
				Bambi-ps1
				Zc3h12a
				Btg1
				Tnfsf8
				Tk1
				Btnl2
				Tbc1d12
				Rpl35
				Gpr68
				Chn2
				Dtx4
				Tspan13
				Nedd9
				Rhoq
				A930011G23Rik
				Tmem206
				Arl11
				Mill2
				Thbs2
				Gm15832
				NoGeneName
				B4galt1
				Nfkbib
				Chp2
				Slc7a13
				Rpl27a
				Ankrd28
				Syngr2
				Ptk2
				Med22
				Gm12840
				P2rx7
				Cryba4
				Mcoln2
				Gprc5a
				Mcpt4
				Cfd
				Mgst1
				Fchsd2
				Nacc2
				Klc4
				Lrrc32
				Nr1d1
				Btg2
				Ahr
				Zfp948
				Unc119
				Gm2000
				Spaca9
				Ighd
				Gm23935
				Rps12
				Gramd4
				Clstn1
				Pqlc2
				Tpsb2
				Ephb6
				Nck2
				Pnpla7
				Fam107b
				Acot7
				NoGeneName
				Mcm5
				Rpl37
				Itga9
				Folr2
				Matk
				Plekhh3
				Stmn1
				Birc3
				Grn
				Cysltr1
				Rsad2
				Prkcb
				Ppp1r3b
				Meis3
				Ezr
				Rps23
				Rogdi
				Fam20c
				Tcn2
				Tnfaip8l1
				Cdkn1a
				Hist1h2ae
				NoGeneName
				Rab32
				Fcgrt
				Rps26
				Gadd45g
				Trf
				Il17ra
				Gsr
				Gm29336
				Gm26809
				Ahcyl2
				Xxylt1
				Gpt2
				E2f2
				Rpl18a
				Cipc
				Tshz3
				Pmp22
				Gm15445
				Lpar1
				Sec14l1
				Adcy3
				Dbp
				Mfge8
				Gm4955
				Zfp36l1
				Rpl39
				NoGeneName
				Siglech
				Socs3
				Cbr3
				Adam9
				Cma1
				Gna15
				Cks1b
				Crip2
				Got1
				C3
				Col14a1
				Slc7a11
				Bin1
				3300005D01Rik
				Rpl17
				Cndp1
				NoGeneName
				Nfkbid
				Zfp472
				Rps28
				Noct
				Cyp2s1
				Ankrd66
				Usp18
				Ifit1
				Rps11-ps1
				Trpv4
				Enpp4
				Rpl41
				Bok
				Ncf1
				Hdc
				Txnip
				Irf7
				Gbp9
				Mcts2
				Armc5
				Optn
				Nfkbia
				Tlr1
				Aplp1
				Pdgfb
				Rgl1
				Ppm1f
				Rps29
				Slc35e3
				Gm10382
				Igfbp4
				Gm26880
				B4galnt1
				Serpine1
				Sesn1
				Gns
				Sde2
				Rpl38
				Rgs1
				Pik3r5
				Cebpd
				Tfec
				Tbc1d2
				Tmbim1
				Msrb3
				Rgmb
				NoGeneName
				Tubb4a
				Gtf2h2
				Cish
				Tmem38b
				Fem1c
				Ppic
				Gramd3
				Gyg
				Pld4
				Lpar6
				Slc18b1
				Cep85
				Ms4a14
				Kif13b
				Gm12902
				Bcl2l11
				Mthfd2
				Tgfbr2
				Tmem204
				Rps7
				NoGeneName
				D730003I15Rik
				Ifrd1
				Irf2bpl
				Inpp5d
				Rel
				Rps6
				Plekhb2
				Smim24
				Ppargc1b
				Tnf
				Hlcs
				H2afz
				Dut
				Nupr1
				Egr1
				Actn1
				Rasa1
				Ski
				Asns
				Gm37033
				Arhgap26
				Lrp1
				1810034E14Rik
				Mir142hg
				Kifc3
				Acap3
				Cebpzos
				Abhd15
				NoGeneName
				Gda
				mt-Tp
				Hsp90aa1
				Cd300ld3
				Rasgrp1
				Acy3
				Hmgb2
				C77080
				Nlrp10
				Tmx4
				Zswim7
				Ube2g2
				Sertad1
				Mrps6
				Fez2
				Rps14
				Ckap2l
				Adam15
				Mob2
				Kcnk5
				Hgf
				Tnmd
				Jun
				Zyx
				Gm5617
				Npl
				Avpi1
				NoGeneName
				Gm38062
				Tmem63a
				Pik3r2
				Il1rl2
				Kcng2
				B3gnt8
				Ifitm10
				Gm26885
				Timd4
				Ecm1
				Tor4a
				Pla2g15
				Eif2ak3
				Trim25
				3110082I17Rik
				Pcolce
				Plcb3
				Gm14636
				Bank1
				4932438H23Rik
				Arhgap23
				Pkp4
				Nek6
				Rps24
				Gm13391
				Ptafr
				Itpkb
				Ccdc69
				Fam53b
				Sorl1
				Mr1
				Asb10
				Aph1c
				Ccr1l1
				Itgal
				Hpgd
				Bhlhe41
				Lum
				Cxx1b
				F830016B08Rik
				Cxcl14
				Fos
				Gm20703
				Zdhhc14
				Trove2
				Ifi27l2a
				A630033H20Rik
				Trim35
				Sla
				Egfr
				Hr
				Adam33
				Bcl2
				Rps15a
				Ralgds
				Tspan14
				Uchl3
				Rpl24
				Ifitm1
				Sub1
				Coro1a
				Lsm7
				B4gat1
				5330406M23Rik
				Trnp1
				Gdpd1
				Fkbp14
				Gas7
				Gm9949
				Cd33
				Xdh
				Skil
				Cebpb
				Smpdl3a
				Spns2
				Prkcdbp
				Amotl1
				Myo7a
				Tmem8
				Clec4n
				Fmn1
				Rps25
				Ak1
				Bag5
				Fh1
				Plekhf1
				Pwwp2b
				Cbr2
				Slc25a33
				Cdc25b
				Tlr11
				NoGeneName
				Lgals9
				Cd300ld
				Rpsa
				Stk19-ps1
				Alcam
				Hcar2
				Tlr5
				Gpr146
				Rnasel
				Rpl35a
				Rpl36a
				Trim47
				Rubcn
				Palm
				St3gal6
				Birc5
				Cyp27a1
				Fam109a
				Ifi47
				Smagp
				1700017B05Rik
				Dok4
				Fam126a
				Sephs2
				Nr1h3
				Selm
				Ndc80
				Mertk
				Wdr6
				Chek2
				Glrx
				Myo1f
				St3gal2
				Ticam1
				Rbbp9
				Cd72
				Zfp263
				2410006H16Rik
				Cyth3
				Gbp3
				Chd9
				Plscr4
				Gm15539
				Slc16a3
				Klf9
				Xrcc5
				Mrpl52
				Nxpe5
				Ugcg
				Scand1
				Plxnb2
				Lgalsl
				Ccdc88b
				Tsc2
				Fcgr2b
				Vhl
				Hmga1
				Bfsp1
				Fam105a
				Arhgap18
				Tle1
				Rprd1a
				Tmem41a
				Pim3
				Rps9
				Hyal2
				Dtx3
				Ntpcr
				Dpt
				Rcan3
				Ly9
				Cdkn2c
				D930030I03Rik
				Tuft1
				Fyn
				Acot1
				Suox
				Rps27a
				NoGeneName
				Rps20
				Klf2
				Pira2
				Ajuba
				NoGeneName
				Col4a2
				F3
				Galnt7
				Rab11fip5
				Svbp
				Clec4d
				Cadm1
				Tmem184b
				Alox5
				Ggcx
				Slfn2
				S100a10
				Arsg
				Rasgef1a
				Tspan18
				C1ra
				Ier3
				Orai2
				Tusc1
				Naa60
				Nfe2l2
				Prr5l
				Tns4
				Grk5
				Bambi
				Osm
				Hpcal1
				Rps10
				Il27ra
				Gm26542
				Gm10134
				Wwp1
				Gng12
				Cela1
				Fam117a
				Slc13a3
				Tcaf1
				Klf6
				Csf2ra
				Rps16
				Mfsd3
				Csf3r
				Man2b1
				Dag1
				Sdc3
				Rps3a1
				Sigmar1
				Reps2
				Etv1
				Fam134b
				Rpl23a
				Rpl34
				Arl4c
				Fitm2
				Cited2
				Mcu
				Smim10l2a
				Sept10
				Fgd6
				Bub1b
				Rarb
				Siglece
				Cers6
				Fosb
				NoGeneName
				Natd1
				Hmgn2
				Ica1
				AI467606
				Pvr
				Tep1
				Ctsc
				Tspan4
				Myd88
				Pigz
				Tmem104
				Tm4sf19
				Fam213b
				Fam110a
				Csrp2
				NoGeneName
				Ldlrad4
				App
				Snrpd1
				Dusp8
				Klc1
				Spata13
				Igfbp7
				Tnfrsf1b
				Cd40
				Rhoc
				Lbx2
				Igf2r
				Aplp2
				Vasp
				P4ha1
				Ghdc
				Rps27l
				Aldh7a1
				H2afx
				Mtss1
				Cebpa
				Rnf19b
				Tmsb4x
				Rps2
				Tbc1d4
				Il1r1
				Jund
				Mtmr6
				Fau
				Fblim1
				Wdr7
				Kbtbd7
				Palld
				Rab3gap1
				Tlr8
				Ptpn22
				Cln5
				Ier5
				Cenpm
				Epor
				Cep19
				Atox1
				Nrp1
				Gm14005
				Slc23a2
				Sepp1
				Nme4
				Cd82
				Rpl14
				B4galt6
				Angptl7
				Ms4a7
				Dnajc10
				Emp1
				Gng10
				Gga2
				Zmynd15
				Gm20056
				Sod3
				NoGeneName
				Dclre1c
				Hif1a
				Snx24
				Pydc4
				Kdm6bos
				Lix1
				Sipa1
				Fam110b
				Tmem150a
				Ddx60
				Ly86
				Chst7
				Thbd
				NoGeneName
				A630081D01Rik
				Arhgap27
				Tmem132a
				Nr1d2
				Gm37758
				Rapgef6
				Zfp580
				Tpp1
				Fuca2
				Rtp4
				Gm26522
				Tab1
				Rusc2
				Inmt
				Rps4x
				Rgcc
				Akr1c12
				Sh3gl1
				Kcnk13
				Esyt1
				Pip4k2c
				Gm17147
				Kifc2
				Rps6ka2
				Rpl11
				Ap5s1
				Gm9843
				Mustn1
				Hrh1
				Wwc2
				Slc38a1
				Sgce
				Cttnbp2nl
				Rpl9
				Mafb
				Rplp2
				Gm16907
				Ckb
				Gm684
				Ell2
				Apobec1
				Arc
				Siva1
				Frmd4b
				Fndc3b
				Ppp2r5b
				Itgb2
				Adnp2
				NoGeneName
				Ifi30
				Gpr137b-ps
				Bst1
				BC043934
				Cd4
				Fcho2
				Fam63a
				Fgf2
				Dna2
				Fosl2
				Prps2
				Fbxl3
				Ube2c
				Cib2
				Lat2
				Manba
				Eef1akmt1
				Dennd4a
				Ccdc152
				Irs2
				Cnn3
				Vis1
				Gm14221
				Aldh1b1
				Zfp703
				Ero1lb
				Calml4
				2610203C22Rik
				Pkib
				Cd44
				Hmox1
				Map2k3os
				Hck
				Smim14
				Limd2
				Clcn7
				Tmem261
				Nrep
				Mgp
				Mapkapk3
				NoGeneName
				Cav2
				Ank
				Epsti1
				Phf1
				Cpt1a
				Mx1
				Fam43a
				Scd1
				Vill
				Smpd3
				Cc2d1b
				4930589L23Rik
				Gm29371
				Hlx
				Nmt1
				Ttc30b
				Nuak2
				Gm14057
				Cd200r1
				Plod3
				Ostm1
				Tcta
				Cmbl
				Rsph9
				Hnmt
				Bzw2
				Msr1
				NoGeneName
				Car13
				Extl3
				Evl
				C1rl
				Il16
				Ddx41
				Nostrin
				Sfxn3
				Sec24d
				Cd84
				Ccar2
				2610301B20Rik
				Cxx1c
				Spc24
				Rps11
				Chmp6
				Adssl1
				Dab2
				Smug1
				B4galt5
				Rpl4
				Prkar2a
				Ctse
				Tmem2
				Ier5l
				Etfb
				Ppfia4
				Arl10
				Nr4a1
				Arhgap24
				Tes
				Tgif1
				Zcchc6
				Trip6
				Gm37399
				Plaur
				Antxr2
				Vdr
				Bmp2k
				Hk3
				Vps18
				Gm15662
				Lgals3bp
				Ddah2
				Rgs5
				Ttc28
				Abcc1
				Arap1
				NoGeneName
				Rassf4
				Plcg2
				Fcgr1
				Eif5a2
				Mki67
				Zmiz1
				Gprc5b
				Apba3
				Tuba1a
				Man2b2
				Bmpr1a
				Fbxo32
				Atmin
				Casp4
				Cd300lf
				Cybb
				Ccdc126
				Def6
				Slc44a2
				Kif1b
				Serinc5
				Fkbp7
				Dusp10
				Pabpc1
				Sgsm3
				Tppp3
				Cnn2
				Snap47
				NoGeneName
				Tubb2a
				Rps21
				Ctdnep1
				Rab11a
				Agtrap
				Llgl1
				Gpr157
				Rpa3
				Rplp1
				Rps5
				Zfp422
				Twf1
				Chsy1
				Slc20a1
				Cd300a
				Rpl6
				Rhbdf1
				Map3k6
				Gbp7
				Tln2
				Pdp1
				Rpl7a
				Adck1
				Rps15
				Pepd
				Mylip
				Ngfrap1
				6820402A03Rik
				5031414D18Rik
				A930018M24Rik
				Lamp2
				Gm12589
				Susd1
				Oas1a
				Chpf2
				Wfdc17
				Slc26a11
				Sfrp4
				Sipa1l2
				Gstm1
				Tlr4
				Trim16
				Hebp1
				Apod
				Pank1
				Rpl15
				Stbd1
				Bora
				Cdc14b
				Tubb3
				Ccdc90b
				Nckap1
				Smad1
				Ssc5d
				Tnfaip1
				Srgap2
				Rtcb
				Fam118a
				Nusap1
				Sgsh
				Nrde2
				Arid5a
				Gm21897
				Ercc6l
				Dnajc15
				Dnaaf3
				Pcyox1l
				Sept6
				Agap3
				Fut8
				Lhfp
				Cdca8
				Sbk1
				Cd83
				Mgat1
				Ephx1
				1600010M07Rik
				Dyrk3
				NoGeneName
				Tfpi
				Tmem106b
				Mob3c
				Plbd2
				Ggact
				Litaf
				Bach1
				Asf1b
				Rpl21
				Ms4a6b
				Cenpp
				Elk3
				Pold4
				Smpdl3b
				Cdca7
				Kin
				NoGeneName
				Rpl10
				Nup54
				Melk
				Per2
				Gm17971
				Tmem87b
				Trim30c
				Sptbn1
				Tmem18
				Ccdc102a
				Rhof
				Ptger4
				Rpl23
				Mnda
				Gm17024
				Eepd1
				Icmt
				Tbc1d14
				Rpl28
				Ampd3
				Baz1a
				Eps8
				Irf1
				Rpl10a
				Rpl31
				Smim4
				Rplp0
				Tnfaip2
				Aldh3b1
				Rasal2
				Rfk
				Ficd
				Osbpl11
				Slc38a7
				Snx2
				Lsm10
				Ccne1
				Stx2
				Arntl
				1810044D09Rik
				Rrm2
				Slc35f5
				Dusp23
				Dennd2a
				Nampt
				Scarb1
				Snrpg
				Rps17
				Dock2
				2310022A10Rik
				Strn4
				Dctpp1
				Zcchc24
				Abhd12
				Mxi1
				Slc22a4
				Mrc1
				Sesn2
				Gm42418
				Mmp11
				Arhgap31
				Lbr
				Atp13a2
				Nfe2l1
				Fbxw11
				Kbtbd2
				Snrpf
				Cd36
				Socs6
				Rps8
				Eid2b
				Sord
				Sh2b2
				1700007L15Rik
				Gm13966
				Ptprc
				Zc3h12c
				Slc24a3
				Wasl
				Chaf1b
				Naprt
				Vegfb
				Wisp2
				Cpne2
				Tbc1d9b
				Ak2
				Nhsl2
				Icam2
				Slc7a7
				Nptn
				Slc28a2
				Nbr1
				Ctdp1
				Vps37b
				Stxbp6
				Ifi205
				Igsf6
				Ggt5
				Lrrc8c
				1810049J17Rik
				Cux1
				NoGeneName
				F630028O10Rik
				Slc37a2
				Mmgt2
				Galnt4
				Cd28
				Srsf7
				Cgref1
				Specc1
				Slc38a10
				Sdf2l1
				Vmp1
				Lamc1
				Anxa11
				Rpl12
				Trim13
				2610008E11Rik
				Acvr2a
				Galnt12
				Tmem65
				Pcmtd1
				Slc12a9
				Wdr5b
				Dram1
				Fv1
				Lpar3
				Rpl26
				Hsd17b7
				NoGeneName
				2700012I20Rik
				Gm15448
				Tlr2
				Fut10
				NoGeneName
				Sbno2
				2410131K14Rik
				P2ry1
				Sparcl1
				Slc4a2
				Tmem9
				H2afv
				Swsap1
				Wee1
				Cables1
				Frrs1
				Dock8
				Fyb
				Slc7a8
				Rab38
				Angel1
				Sec61g
				Maged1
				Stk38l
				Serpinf1
				Rpl22
				Rpl18
				Plk2
				Gm9888
				NoGeneName
				Aaed1
				Sun1
				Arhgef10
				Magoh
				Grap
				NoGeneName
				Ppcdc
				Smpd1
				H2-Ob
				Rdh10
				Adi1
				Pcolce2
				Slc8b1
				Tgfbi
				Csf1r
				Slc16a6
				Pon2
				Gk
				Best1
				Fam63b
				Lrrc57
				Anxa1
				Rpl8
				Tgm1
				Dynlt1a
				Eif3f
				Zswim3
				Xylt1
				Cystm1
				Adrb2
				Rpl29
				Tnfrsf23
				Jarid2
				Usb1
				NoGeneName
				Pink1
				Pcdhgb2
				Penk
				Rcn3
				NoGeneName
				Lrrk1
				Nrip1
				Themis2
				Cyb5r3
				Stom
				Psma4
				Jup
				Smim13
				Edil3
				Slc43a2
				Tpcn1
				Tbcd
				Stoml1
				Zfp955a
				Ccdc57
				H2-K2
				Slc52a2
				Ccnb2
				St6gal1
				Cxx1a
				Hyal1
				Zcchc3
				Sqle
				Asb4
				Hspb7
				mt-Ts1
				Tns3
				Slc39a10
				Sash1
				Otud1
				C5ar1
				Efcab11
				Rpl19
				NoGeneName
				Ankrd46
				Mrpl54
				Chst14
				Slamf9
				Adam10
				Ifi203
				Ifit3b
				Ccnd1
				Rrs1
				Cercam
				Oasl2
				Parp3
				Scrn3
				Mgat4b
				Cd59a
				Pld2
				Rpl27
				Gm29340
				Gnat3
				Slc7a5
				Marcks
				Rps13
				Tmem184c
				Gm37648
				Abcd3
				Sirpa
				Aars2
				Tnfrsf11a
				Cyp2j6
				Lrrc25
				Itsn1
				Gab3
				NoGeneName
				Maml2
				Mcm3ap
				Gm8797
				Gatsl3
				Sec24c
				Cd37
				NoGeneName
				Sphk2
				Fam198b
				Gcnt1
				Pcyox1
				Syt11
				Rgl2
				Milr1
				Tbc1d22a
				Itpkc
				5830432E09Rik
				Pon3
				H3f3a
				Mras
				Uhrf1bp1l
				Tcf12
				Col3a1
				Nrap
				Opn3
				Sh3tc1
				NoGeneName
				Frk
				Ap2a2
				Mical1
				NoGeneName
				Fndc4
				Rack1
				Bnip3
				Stxbp5
				Stk11ip
				Gm7292
				Gkap1
				Cyfip1
				Dhcr24
				Lima1
				Slc29a3
				Pgam2
				H6pd
				Ptp4a3
				Gas2l1
				H2afy
				Slc20a2
				Mcm7
				Tgtp2
				Scamp2
				March8
				Gaa
				Tmem110
				Reg2
				Myo10
				2310001H17Rik
				Lmo4
				Tctex1d2
				2500002B13Rik
				Qsox1
				Gm10384
				Gga1
				Rasd1
				NoGeneName
				NoGeneName
				Peak1
				Cdt1
				Eef1g
				Ly6e
				Prcp
				Tmem165
				H2-K1
				Slc25a24
				Tmem238
				Gm6277
				Cenph
				Sptssa
				Vcl
				Polk
				E2f6
				Rnf13
				Aoah
				Rpl30
				Rac3
				Vav1
				1700003F12Rik
				Col6a1
				Hectd3
				Stat6
				Slc6a8
				Dapp1
				Map3k11
				Cdk6
				BC028528
				Sav1
				Atp5e
				Ctsa
				Gm26908
				Tmed1
				Slbp
				Aprt
				Uba52
				Cd300lg
				Rpl7
				Cdkn2aipnl
				Prkacb
				Rbsn
				Dhx32
				Gmfg
				Abtb2
				Hspa1a
				Dpp7
				Sigirr
				Zranb3
				Psmb9
				Spg20
				Aurkb
				Sirt2
				Rasa3
				Slc35e4
				N4bp1
				Ptchd1
				Ccdc85b
				Mmp3
				Ifit2
				Fbxw4
				Pik3cg
				Abca9
				Ulk2
				Wipi1
				Fads1
				Rpusd4
				Tmem64
				Dgkz
				E2f3
				Pdgfa
				4931406P16Rik
				Acta1
				Eef1a1
				Bbs12
				Cox6b2
[truncated: 10,041 more rows]

## Sheet: 1 Gorilla v expressed
GO Term	Description	P-value	FDR q-value	Enrichment	N	B	n	b	Genes
GO:0006952	defense response	1.99e-08	0.000276	4.11	11038	633	89	21	[Rnasel - ribonuclease l (2', 5'-oligoisoadenylate synthetase-dependent), Ptk2 - ptk2 protein tyrosine kinase 2, Lcn2 - lipocalin 2, Plac8 - placenta-specific 8, Aqp1 - aquaporin 1, Hp - haptoglobin, Ltf - lactotransferrin, Serpinb1a - serine (or cysteine) peptidase inhibitor, clade b, member 1a, Cxcr3 - chemokine (c-x-c motif) receptor 3, Chi3l3 - chitinase 3-like 3, Hmgb2 - high mobility group …
GO:0009607	response to biotic stimulus	1.74e-06	0.0121	3.79	11038	556	89	17	[Rnasel - ribonuclease l (2', 5'-oligoisoadenylate synthetase-dependent), Lcn2 - lipocalin 2, Slfn4 - schlafen 4, Plac8 - placenta-specific 8, Lrg1 - leucine-rich alpha-2-glycoprotein 1, Aqp1 - aquaporin 1, Hp - haptoglobin, Ltf - lactotransferrin, Hmgb2 - high mobility group box 2, Ifitm6 - interferon induced transmembrane protein 6, Ednrb - endothelin receptor type b, Ifi27l2a - interferon, alp…
GO:0009605	response to external stimulus	2.11e-06	0.00972	3.12	11038	836	89	21	[Rnasel - ribonuclease l (2', 5'-oligoisoadenylate synthetase-dependent), Lcn2 - lipocalin 2, Slfn4 - schlafen 4, Plac8 - placenta-specific 8, Lrg1 - leucine-rich alpha-2-glycoprotein 1, Aqp1 - aquaporin 1, Hp - haptoglobin, Ltf - lactotransferrin, Fosl1 - fos-like antigen 1, Hmgb2 - high mobility group box 2, Gatm - glycine amidinotransferase (l-arginine:glycine amidinotransferase), Tfrc - trans…
GO:0051707	response to other organism	4.97e-06	0.0172	4.2	11038	413	89	14	[Rnasel - ribonuclease l (2', 5'-oligoisoadenylate synthetase-dependent), Lcn2 - lipocalin 2, Slfn4 - schlafen 4, Plac8 - placenta-specific 8, Lrg1 - leucine-rich alpha-2-glycoprotein 1, Aqp1 - aquaporin 1, Hp - haptoglobin, Ltf - lactotransferrin, Hmgb2 - high mobility group box 2, Ifitm6 - interferon induced transmembrane protein 6, Ifi27l2a - interferon, alpha-inducible protein 27 like 2a, C3 …
GO:0043207	response to external biotic stimulus	5e-06	0.0138	3.7	11038	536	89	16	[Rnasel - ribonuclease l (2', 5'-oligoisoadenylate synthetase-dependent), Lcn2 - lipocalin 2, Slfn4 - schlafen 4, Plac8 - placenta-specific 8, Lrg1 - leucine-rich alpha-2-glycoprotein 1, Aqp1 - aquaporin 1, Hp - haptoglobin, Ltf - lactotransferrin, Hmgb2 - high mobility group box 2, Ifitm6 - interferon induced transmembrane protein 6, Ednrb - endothelin receptor type b, Ifi27l2a - interferon, alp…
GO:0002544	chronic inflammatory response	5.01e-06	0.0116	74.41	11038	5	89	3	[Gja1 - gap junction protein, alpha 1, Camp - cathelicidin antimicrobial peptide, S100a9 - s100 calcium binding protein a9 (calgranulin b)]
GO:0009617	response to bacterium	7.49e-06	0.0148	5.85	11038	212	89	10	[Lcn2 - lipocalin 2, Slfn4 - schlafen 4, Plac8 - placenta-specific 8, Lrg1 - leucine-rich alpha-2-glycoprotein 1, Aqp1 - aquaporin 1, Hp - haptoglobin, Ltf - lactotransferrin, C3 - complement component 3, Hmgb2 - high mobility group box 2, Camp - cathelicidin antimicrobial peptide]
GO:0030001	metal ion transport	1.98e-05	0.0343	5.23	11038	237	89	10	[Slc35g1 - solute carrier family 35, member g1, Slc10a6 - solute carrier family 10 (sodium/bile acid cotransporter family), member 6, Fxyd2 - fxyd domain-containing ion transport regulator 2, Slc40a1 - solute carrier family 40 (iron-regulated transporter), member 1, Tfrc - transferrin receptor, Aqp1 - aquaporin 1, Ltf - lactotransferrin, Steap4 - steap family member 4, Kcnk5 - potassium channel, …
GO:0008284	positive regulation of cell proliferation	2.1e-05	0.0323	3.3	11038	601	89	16	[Ptk2 - ptk2 protein tyrosine kinase 2, Crip2 - cysteine rich protein 2, Plac8 - placenta-specific 8, Fgfr1 - fibroblast growth factor receptor 1, Lrg1 - leucine-rich alpha-2-glycoprotein 1, Aqp1 - aquaporin 1, Ltf - lactotransferrin, Cxcr3 - chemokine (c-x-c motif) receptor 3, Egfr - epidermal growth factor receptor, Hmgb2 - high mobility group box 2, Tfrc - transferrin receptor, Ednrb - endothe…
GO:0006954	inflammatory response	2.55e-05	0.0353	5.08	11038	244	89	10	[Hp - haptoglobin, Serpinb1a - serine (or cysteine) peptidase inhibitor, clade b, member 1a, Gja1 - gap junction protein, alpha 1, Cxcr3 - chemokine (c-x-c motif) receptor 3, C3 - complement component 3, Chi3l3 - chitinase 3-like 3, Hmgb2 - high mobility group box 2, S100a8 - s100 calcium binding protein a8 (calgranulin a), Camp - cathelicidin antimicrobial peptide, S100a9 - s100 calcium binding …
GO:0002376	immune system process	3.51e-05	0.0442	2.6	11038	1003	89	21	[Rnasel - ribonuclease l (2', 5'-oligoisoadenylate synthetase-dependent), Ptk2 - ptk2 protein tyrosine kinase 2, Fcgrt - fc receptor, igg, alpha chain transporter, Slc40a1 - solute carrier family 40 (iron-regulated transporter), member 1, Lcn2 - lipocalin 2, Hp - haptoglobin, Ltf - lactotransferrin, Cxcr3 - chemokine (c-x-c motif) receptor 3, Bcl6b - b cell cll/lymphoma 6, member b, Hmgb2 - high …
GO:0016477	cell migration	3.99e-05	0.0461	3.49	11038	497	89	14	[Ptk2 - ptk2 protein tyrosine kinase 2, Sorl1 - sortilin-related receptor, ldlr class a repeats-containing, Cxcr3 - chemokine (c-x-c motif) receptor 3, Egfr - epidermal growth factor receptor, Hmgb2 - high mobility group box 2, 1600029D21Rik - riken cdna 1600029d21 gene, Ednrb - endothelin receptor type b, Gja1 - gap junction protein, alpha 1, Cyr61 - cysteine rich protein 61, Ctgf - connective t…
GO:0006959	humoral immune response	4.32e-05	0.046	9.3	11038	80	89	6	[Ltf - lactotransferrin, C2 - complement component 2 (within h-2s), C3 - complement component 3, C4b - complement component 4b (chido blood group), Camp - cathelicidin antimicrobial peptide, S100a9 - s100 calcium binding protein a9 (calgranulin b)]
GO:0006826	iron ion transport	5.16e-05	0.051	19.08	11038	26	89	4	[Slc40a1 - solute carrier family 40 (iron-regulated transporter), member 1, Tfrc - transferrin receptor, Ltf - lactotransferrin, Steap4 - steap family member 4]
GO:0072376	protein activation cascade	6.01e-05	0.0555	18.37	11038	27	89	4	[C2 - complement component 2 (within h-2s), F13a1 - coagulation factor xiii, a1 subunit, C3 - complement component 3, C4b - complement component 4b (chido blood group)]
GO:0042742	defense response to bacterium	6.12e-05	0.053	7	11038	124	89	7	[Lcn2 - lipocalin 2, Plac8 - placenta-specific 8, Aqp1 - aquaporin 1, Hp - haptoglobin, Ltf - lactotransferrin, Hmgb2 - high mobility group box 2, Camp - cathelicidin antimicrobial peptide]
GO:0070488	neutrophil aggregation	6.43e-05	0.0524	124.02	11038	2	89	2	[S100a8 - s100 calcium binding protein a8 (calgranulin a), S100a9 - s100 calcium binding protein a9 (calgranulin b)]
GO:0042127	regulation of cell proliferation	6.51e-05	0.0501	2.49	11038	1046	89	21	[Lbx1 - ladybird homeobox homolog 1 (drosophila), Ptk2 - ptk2 protein tyrosine kinase 2, Crip2 - cysteine rich protein 2, Plac8 - placenta-specific 8, Lrg1 - leucine-rich alpha-2-glycoprotein 1, Fgfr1 - fibroblast growth factor receptor 1, Aqp1 - aquaporin 1, Trnp1 - tmf1-regulated nuclear protein 1, Ltf - lactotransferrin, Fosl1 - fos-like antigen 1, Cxcr3 - chemokine (c-x-c motif) receptor 3, E…
GO:0006955	immune response	6.66e-05	0.0486	3.33	11038	521	89	14	[Ptk2 - ptk2 protein tyrosine kinase 2, Fcgrt - fc receptor, igg, alpha chain transporter, Lcn2 - lipocalin 2, Ltf - lactotransferrin, Cxcr3 - chemokine (c-x-c motif) receptor 3, Bcl6b - b cell cll/lymphoma 6, member b, Hmgb2 - high mobility group box 2, Ctsk - cathepsin k, C2 - complement component 2 (within h-2s), C3 - complement component 3, C4b - complement component 4b (chido blood group), S…
GO:0055072	iron ion homeostasis	7.71e-05	0.0534	11.27	11038	55	89	5	[Slc40a1 - solute carrier family 40 (iron-regulated transporter), member 1, Lcn2 - lipocalin 2, Tfrc - transferrin receptor, Ltf - lactotransferrin, Steap4 - steap family member 4]
GO:0048870	cell motility	9.4e-05	0.062	3.23	11038	538	89	14	[Ptk2 - ptk2 protein tyrosine kinase 2, Sorl1 - sortilin-related receptor, ldlr class a repeats-containing, Cxcr3 - chemokine (c-x-c motif) receptor 3, Egfr - epidermal growth factor receptor, Hmgb2 - high mobility group box 2, 1600029D21Rik - riken cdna 1600029d21 gene, Ednrb - endothelin receptor type b, Gja1 - gap junction protein, alpha 1, Cyr61 - cysteine rich protein 61, Ctgf - connective t…
GO:0051240	positive regulation of multicellular organismal process	0.000105	0.0659	2.34	11038	1165	89	22	[Ptk2 - ptk2 protein tyrosine kinase 2, Sorl1 - sortilin-related receptor, ldlr class a repeats-containing, Lcn2 - lipocalin 2, Plac8 - placenta-specific 8, Tppp - tubulin polymerization promoting protein, Lrg1 - leucine-rich alpha-2-glycoprotein 1, Fgfr1 - fibroblast growth factor receptor 1, Aqp1 - aquaporin 1, Ltf - lactotransferrin, Cxcr3 - chemokine (c-x-c motif) receptor 3, Cma1 - chymase 1…
GO:0052547	regulation of peptidase activity	0.000112	0.0672	4.75	11038	235	89	9	[Sorl1 - sortilin-related receptor, ldlr class a repeats-containing, Ngp - neutrophilic granule protein, Aqp1 - aquaporin 1, Ltf - lactotransferrin, Serpinb1a - serine (or cysteine) peptidase inhibitor, clade b, member 1a, Ctgf - connective tissue growth factor, Cyr61 - cysteine rich protein 61, S100a8 - s100 calcium binding protein a8 (calgranulin a), S100a9 - s100 calcium binding protein a9 (ca…
GO:0065008	regulation of biological quality	0.000126	0.0729	1.86	11038	2201	89	33	[Rnasel - ribonuclease l (2', 5'-oligoisoadenylate synthetase-dependent), Sorl1 - sortilin-related receptor, ldlr class a repeats-containing, Slc40a1 - solute carrier family 40 (iron-regulated transporter), member 1, Aqp1 - aquaporin 1, Serpinb1a - serine (or cysteine) peptidase inhibitor, clade b, member 1a, Ltf - lactotransferrin, Mcpt4 - mast cell protease 4, Cxcr3 - chemokine (c-x-c motif) re…
GO:0050878	regulation of body fluid levels	0.000144	0.0797	6.11	11038	142	89	7	[Ednrb - endothelin receptor type b, Aqp1 - aquaporin 1, Gja1 - gap junction protein, alpha 1, Egfr - epidermal growth factor receptor, F13a1 - coagulation factor xiii, a1 subunit, C3 - complement component 3, S100a9 - s100 calcium binding protein a9 (calgranulin b)]
GO:0061035	regulation of cartilage development	0.000191	0.102	13.78	11038	36	89	4	[Ctsk - cathepsin k, Cyr61 - cysteine rich protein 61, Ctgf - connective tissue growth factor, Fam101b - family with sequence similarity 101, member b]
GO:0002002	regulation of angiotensin levels in blood	0.000192	0.0984	82.68	11038	3	89	2	[Mcpt4 - mast cell protease 4, Cpa3 - carboxypeptidase a3, mast cell]
GO:0050829	defense response to Gram-negative bacterium	0.000213	0.105	13.41	11038	37	89	4	[Aqp1 - aquaporin 1, Ltf - lactotransferrin, Hmgb2 - high mobility group box 2, Camp - cathelicidin antimicrobial peptide]
GO:0098771	inorganic ion homeostasis	0.000223	0.107	3.6	11038	379	89	11	[Ptk2 - ptk2 protein tyrosine kinase 2, Slc35g1 - solute carrier family 35, member g1, Lcn2 - lipocalin 2, Slc40a1 - solute carrier family 40 (iron-regulated transporter), member 1, Tfrc - transferrin receptor, Ednrb - endothelin receptor type b, Ltf - lactotransferrin, Steap4 - steap family member 4, Gja1 - gap junction protein, alpha 1, Cxcr3 - chemokine (c-x-c motif) receptor 3, Egfr - epiderm…
GO:0003014	renal system process	0.000236	0.109	13.05	11038	38	89	4	[Ednrb - endothelin receptor type b, Aqp1 - aquaporin 1, Gja1 - gap junction protein, alpha 1, Coro2b - coronin, actin binding protein, 2b]
GO:0040011	locomotion	0.000243	0.109	2.95	11038	589	89	14	[Ptk2 - ptk2 protein tyrosine kinase 2, Sorl1 - sortilin-related receptor, ldlr class a repeats-containing, Cxcr3 - chemokine (c-x-c motif) receptor 3, Egfr - epidermal growth factor receptor, Hmgb2 - high mobility group box 2, 1600029D21Rik - riken cdna 1600029d21 gene, Ednrb - endothelin receptor type b, Gja1 - gap junction protein, alpha 1, Cyr61 - cysteine rich protein 61, Ctgf - connective t…
GO:0098801	regulation of renal system process	0.000263	0.114	23.25	11038	16	89	3	[Ednrb - endothelin receptor type b, Gja1 - gap junction protein, alpha 1, Coro2b - coronin, actin binding protein, 2b]
GO:0140115	export across plasma membrane	0.000263	0.11	23.25	11038	16	89	3	[Slc40a1 - solute carrier family 40 (iron-regulated transporter), member 1, Kcnk5 - potassium channel, subfamily k, member 5, Gja1 - gap junction protein, alpha 1]
GO:0006812	cation transport	0.000269	0.11	3.83	11038	324	89	10	[Slc35g1 - solute carrier family 35, member g1, Slc10a6 - solute carrier family 10 (sodium/bile acid cotransporter family), member 6, Fxyd2 - fxyd domain-containing ion transport regulator 2, Slc40a1 - solute carrier family 40 (iron-regulated transporter), member 1, Tfrc - transferrin receptor, Aqp1 - aquaporin 1, Ltf - lactotransferrin, Steap4 - steap family member 4, Kcnk5 - potassium channel, …
GO:0055065	metal ion homeostasis	0.000276	0.109	3.82	11038	325	89	10	[Slc35g1 - solute carrier family 35, member g1, Lcn2 - lipocalin 2, Slc40a1 - solute carrier family 40 (iron-regulated transporter), member 1, Tfrc - transferrin receptor, Ednrb - endothelin receptor type b, Ltf - lactotransferrin, Steap4 - steap family member 4, Gja1 - gap junction protein, alpha 1, Cxcr3 - chemokine (c-x-c motif) receptor 3, Egfr - epidermal growth factor receptor]
GO:0010817	regulation of hormone levels	0.000299	0.115	4.16	11038	268	89	9	[Rdh12 - retinol dehydrogenase 12, Ctsk - cathepsin k, Fgfr1 - fibroblast growth factor receptor 1, Aqp1 - aquaporin 1, Mcpt4 - mast cell protease 4, Gja1 - gap junction protein, alpha 1, Egfr - epidermal growth factor receptor, Cpa3 - carboxypeptidase a3, mast cell, Enpep - glutamyl aminopeptidase]
GO:0098542	defense response to other organism	0.000316	0.118	4.13	11038	270	89	9	[Rnasel - ribonuclease l (2', 5'-oligoisoadenylate synthetase-dependent), Lcn2 - lipocalin 2, Plac8 - placenta-specific 8, Ifitm6 - interferon induced transmembrane protein 6, Aqp1 - aquaporin 1, Hp - haptoglobin, Ltf - lactotransferrin, Hmgb2 - high mobility group box 2, Camp - cathelicidin antimicrobial peptide]
GO:0010941	regulation of cell death	0.000321	0.117	2.22	11038	1171	89	21	[Ptk2 - ptk2 protein tyrosine kinase 2, Sorl1 - sortilin-related receptor, ldlr class a repeats-containing, Slc40a1 - solute carrier family 40 (iron-regulated transporter), member 1, Plac8 - placenta-specific 8, Fgfr1 - fibroblast growth factor receptor 1, Aqp1 - aquaporin 1, Hp - haptoglobin, Fosl1 - fos-like antigen 1, Cxcr3 - chemokine (c-x-c motif) receptor 3, Egfr - epidermal growth factor r…
GO:0052548	regulation of endopeptidase activity	0.000322	0.114	4.64	11038	214	89	8	[Sorl1 - sortilin-related receptor, ldlr class a repeats-containing, Aqp1 - aquaporin 1, Ltf - lactotransferrin, Serpinb1a - serine (or cysteine) peptidase inhibitor, clade b, member 1a, Ctgf - connective tissue growth factor, Cyr61 - cysteine rich protein 61, S100a8 - s100 calcium binding protein a8 (calgranulin a), S100a9 - s100 calcium binding protein a9 (calgranulin b)]
GO:0051704	multi-organism process	0.000331	0.114	2.86	11038	607	89	14	[Rnasel - ribonuclease l (2', 5'-oligoisoadenylate synthetase-dependent), Lcn2 - lipocalin 2, Slfn4 - schlafen 4, Plac8 - placenta-specific 8, Lrg1 - leucine-rich alpha-2-glycoprotein 1, Aqp1 - aquaporin 1, Hp - haptoglobin, Ltf - lactotransferrin, Hmgb2 - high mobility group box 2, Ifitm6 - interferon induced transmembrane protein 6, Ifi27l2a - interferon, alpha-inducible protein 27 like 2a, C3 …
GO:0051094	positive regulation of developmental process	0.000349	0.118	2.42	11038	924	89	18	[Ptk2 - ptk2 protein tyrosine kinase 2, Sorl1 - sortilin-related receptor, ldlr class a repeats-containing, Tppp - tubulin polymerization promoting protein, Lrg1 - leucine-rich alpha-2-glycoprotein 1, Fgfr1 - fibroblast growth factor receptor 1, Aqp1 - aquaporin 1, Ltf - lactotransferrin, Cxcr3 - chemokine (c-x-c motif) receptor 3, Cma1 - chymase 1, mast cell, Egfr - epidermal growth factor recep…
GO:1905902	regulation of mesoderm formation	0.000382	0.126	62.01	11038	4	89	2	[Fgfr1 - fibroblast growth factor receptor 1, Gja1 - gap junction protein, alpha 1]
GO:1905770	regulation of mesodermal cell differentiation	0.000382	0.123	62.01	11038	4	89	2	[Fgfr1 - fibroblast growth factor receptor 1, Gja1 - gap junction protein, alpha 1]
GO:0018119	peptidyl-cysteine S-nitrosylation	0.000382	0.12	62.01	11038	4	89	2	[S100a8 - s100 calcium binding protein a8 (calgranulin a), S100a9 - s100 calcium binding protein a9 (calgranulin b)]
GO:0046689	response to mercury ion	0.000382	0.117	62.01	11038	4	89	2	[Aqp1 - aquaporin 1, Gatm - glycine amidinotransferase (l-arginine:glycine amidinotransferase)]
GO:0017014	protein nitrosylation	0.000382	0.115	62.01	11038	4	89	2	[S100a8 - s100 calcium binding protein a8 (calgranulin a), S100a9 - s100 calcium binding protein a9 (calgranulin b)]
GO:0051239	regulation of multicellular organismal process	0.000385	0.113	1.86	11038	1930	89	29	[Sorl1 - sortilin-related receptor, ldlr class a repeats-containing, Lrg1 - leucine-rich alpha-2-glycoprotein 1, Aqp1 - aquaporin 1, Serpinb1a - serine (or cysteine) peptidase inhibitor, clade b, member 1a, Ltf - lactotransferrin, Cxcr3 - chemokine (c-x-c motif) receptor 3, Cma1 - chymase 1, mast cell, Bcl6b - b cell cll/lymphoma 6, member b, Hmgb2 - high mobility group box 2, Ctsk - cathepsin k,…
GO:0031347	regulation of defense response	0.000385	0.111	3.15	11038	472	89	12	[Fgfr1 - fibroblast growth factor receptor 1, Ednrb - endothelin receptor type b, Ltf - lactotransferrin, Serpinb1a - serine (or cysteine) peptidase inhibitor, clade b, member 1a, Gja1 - gap junction protein, alpha 1, Cma1 - chymase 1, mast cell, Egfr - epidermal growth factor receptor, C3 - complement component 3, Bcl6b - b cell cll/lymphoma 6, member b, Hmgb2 - high mobility group box 2, S100a8…
GO:0045766	positive regulation of angiogenesis	0.000484	0.137	6	11038	124	89	6	[Lrg1 - leucine-rich alpha-2-glycoprotein 1, Aqp1 - aquaporin 1, Cma1 - chymase 1, mast cell, Cxcr3 - chemokine (c-x-c motif) receptor 3, C3 - complement component 3, Camp - cathelicidin antimicrobial peptide]
GO:0055076	transition metal ion homeostasis	0.00051	0.141	7.56	11038	82	89	5	[Slc40a1 - solute carrier family 40 (iron-regulated transporter), member 1, Lcn2 - lipocalin 2, Tfrc - transferrin receptor, Ltf - lactotransferrin, Steap4 - steap family member 4]
GO:0050801	ion homeostasis	0.000514	0.14	3.26	11038	418	89	11	[Slc35g1 - solute carrier family 35, member g1, Ptk2 - ptk2 protein tyrosine kinase 2, Lcn2 - lipocalin 2, Slc40a1 - solute carrier family 40 (iron-regulated transporter), member 1, Tfrc - transferrin receptor, Ednrb - endothelin receptor type b, Ltf - lactotransferrin, Steap4 - steap family member 4, Gja1 - gap junction protein, alpha 1, Cxcr3 - chemokine (c-x-c motif) receptor 3, Egfr - epiderm…
GO:2000026	regulation of multicellular organismal development	0.000515	0.137	2.1	11038	1302	89	22	[Lbx1 - ladybird homeobox homolog 1 (drosophila), Ptk2 - ptk2 protein tyrosine kinase 2, Sorl1 - sortilin-related receptor, ldlr class a repeats-containing, Tppp - tubulin polymerization promoting protein, Lrg1 - leucine-rich alpha-2-glycoprotein 1, Fgfr1 - fibroblast growth factor receptor 1, Aqp1 - aquaporin 1, Cxcr3 - chemokine (c-x-c motif) receptor 3, Cma1 - chymase 1, mast cell, Egfr - epid…
GO:0060326	cell chemotaxis	0.000572	0.15	5.81	11038	128	89	6	[Ednrb - endothelin receptor type b, Cxcr3 - chemokine (c-x-c motif) receptor 3, Hmgb2 - high mobility group box 2, Itga9 - integrin alpha 9, S100a8 - s100 calcium binding protein a8 (calgranulin a), S100a9 - s100 calcium binding protein a9 (calgranulin b)]
GO:0042981	regulation of apoptotic process	0.000575	0.147	2.25	11038	1048	89	19	[Ptk2 - ptk2 protein tyrosine kinase 2, Slc40a1 - solute carrier family 40 (iron-regulated transporter), member 1, Plac8 - placenta-specific 8, Fgfr1 - fibroblast growth factor receptor 1, Aqp1 - aquaporin 1, Fosl1 - fos-like antigen 1, Cxcr3 - chemokine (c-x-c motif) receptor 3, Egfr - epidermal growth factor receptor, Hmgb2 - high mobility group box 2, Tfrc - transferrin receptor, Ednrb - endot…
GO:0006935	chemotaxis	0.00059	0.149	4.85	11038	179	89	7	[Ednrb - endothelin receptor type b, Cxcr3 - chemokine (c-x-c motif) receptor 3, Cyr61 - cysteine rich protein 61, Hmgb2 - high mobility group box 2, Itga9 - integrin alpha 9, S100a8 - s100 calcium binding protein a8 (calgranulin a), S100a9 - s100 calcium binding protein a9 (calgranulin b)]
GO:0044057	regulation of system process	0.000601	0.149	3.78	11038	295	89	9	[Ptk2 - ptk2 protein tyrosine kinase 2, Fgfr1 - fibroblast growth factor receptor 1, Tppp - tubulin polymerization promoting protein, Ednrb - endothelin receptor type b, Aqp1 - aquaporin 1, Gja1 - gap junction protein, alpha 1, Ctgf - connective tissue growth factor, Coro2b - coronin, actin binding protein, 2b, Egfr - epidermal growth factor receptor]
GO:0042330	taxis	0.000631	0.153	4.8	11038	181	89	7	[Ednrb - endothelin receptor type b, Cxcr3 - chemokine (c-x-c motif) receptor 3, Cyr61 - cysteine rich protein 61, Hmgb2 - high mobility group box 2, Itga9 - integrin alpha 9, S100a8 - s100 calcium binding protein a8 (calgranulin a), S100a9 - s100 calcium binding protein a9 (calgranulin b)]
GO:0007435	salivary gland morphogenesis	0.000633	0.151	49.61	11038	5	89	2	[Fgfr1 - fibroblast growth factor receptor 1, Egfr - epidermal growth factor receptor]
GO:0006956	complement activation	0.000698	0.164	16.91	11038	22	89	3	[C2 - complement component 2 (within h-2s), C3 - complement component 3, C4b - complement component 4b (chido blood group)]
GO:0043067	regulation of programmed cell death	0.000717	0.166	2.21	11038	1067	89	19	[Ptk2 - ptk2 protein tyrosine kinase 2, Slc40a1 - solute carrier family 40 (iron-regulated transporter), member 1, Plac8 - placenta-specific 8, Fgfr1 - fibroblast growth factor receptor 1, Aqp1 - aquaporin 1, Fosl1 - fos-like antigen 1, Cxcr3 - chemokine (c-x-c motif) receptor 3, Egfr - epidermal growth factor receptor, Hmgb2 - high mobility group box 2, Tfrc - transferrin receptor, Ednrb - endot…
GO:0001936	regulation of endothelial cell proliferation	0.000742	0.168	6.97	11038	89	89	5	[Lrg1 - leucine-rich alpha-2-glycoprotein 1, Fgfr1 - fibroblast growth factor receptor 1, Gja1 - gap junction protein, alpha 1, Cxcr3 - chemokine (c-x-c motif) receptor 3, Hmgb2 - high mobility group box 2]
GO:0050896	response to stimulus	0.000748	0.167	1.6	11038	2944	89	38	[Rnasel - ribonuclease l (2', 5'-oligoisoadenylate synthetase-dependent), Fcgrt - fc receptor, igg, alpha chain transporter, Slfn4 - schlafen 4, Lrg1 - leucine-rich alpha-2-glycoprotein 1, Aqp1 - aquaporin 1, Serpinb1a - serine (or cysteine) peptidase inhibitor, clade b, member 1a, Ltf - lactotransferrin, Cxcr3 - chemokine (c-x-c motif) receptor 3, Bcl6b - b cell cll/lymphoma 6, member b, Chi3l3 …
GO:0030595	leukocyte chemotaxis	0.00078	0.172	6.89	11038	90	89	5	[Ednrb - endothelin receptor type b, Cxcr3 - chemokine (c-x-c motif) receptor 3, Itga9 - integrin alpha 9, S100a8 - s100 calcium binding protein a8 (calgranulin a), S100a9 - s100 calcium binding protein a9 (calgranulin b)]
GO:0055080	cation homeostasis	0.000796	0.172	3.33	11038	372	89	10	[Slc35g1 - solute carrier family 35, member g1, Lcn2 - lipocalin 2, Slc40a1 - solute carrier family 40 (iron-regulated transporter), member 1, Tfrc - transferrin receptor, Ednrb - endothelin receptor type b, Ltf - lactotransferrin, Steap4 - steap family member 4, Gja1 - gap junction protein, alpha 1, Cxcr3 - chemokine (c-x-c motif) receptor 3, Egfr - epidermal growth factor receptor]
GO:0000041	transition metal ion transport	0.000796	0.17	9.54	11038	52	89	4	[Slc40a1 - solute carrier family 40 (iron-regulated transporter), member 1, Tfrc - transferrin receptor, Ltf - lactotransferrin, Steap4 - steap family member 4]
GO:1904018	positive regulation of vasculature development	0.000819	0.172	5.43	11038	137	89	6	[Lrg1 - leucine-rich alpha-2-glycoprotein 1, Aqp1 - aquaporin 1, Cma1 - chymase 1, mast cell, Cxcr3 - chemokine (c-x-c motif) receptor 3, C3 - complement component 3, Camp - cathelicidin antimicrobial peptide]
GO:0031349	positive regulation of defense response	0.000854	0.176	4	11038	248	89	8	[Fgfr1 - fibroblast growth factor receptor 1, Ltf - lactotransferrin, Gja1 - gap junction protein, alpha 1, Egfr - epidermal growth factor receptor, C3 - complement component 3, Hmgb2 - high mobility group box 2, S100a8 - s100 calcium binding protein a8 (calgranulin a), S100a9 - s100 calcium binding protein a9 (calgranulin b)]
GO:0045087	innate immune response	0.000857	0.175	3.6	11038	310	89	9	[Ptk2 - ptk2 protein tyrosine kinase 2, Lcn2 - lipocalin 2, Ltf - lactotransferrin, C2 - complement component 2 (within h-2s), C3 - complement component 3, Hmgb2 - high mobility group box 2, S100a8 - s100 calcium binding protein a8 (calgranulin a), Camp - cathelicidin antimicrobial peptide, S100a9 - s100 calcium binding protein a9 (calgranulin b)]
GO:0045444	fat cell differentiation	0.000862	0.173	6.74	11038	92	89	5	[Rnasel - ribonuclease l (2', 5'-oligoisoadenylate synthetase-dependent), Plac8 - placenta-specific 8, Lrg1 - leucine-rich alpha-2-glycoprotein 1, Steap4 - steap family member 4, Selenbp1 - selenium binding protein 1]
GO:2000427	positive regulation of apoptotic cell clearance	0.000944	0.187	41.34	11038	6	89	2	[C2 - complement component 2 (within h-2s), C3 - complement component 3]
GO:2000425	regulation of apoptotic cell clearance	0.000944	0.184	41.34	11038	6	89	2	[C2 - complement component 2 (within h-2s), C3 - complement component 3]
GO:0035425	autocrine signaling	0.000944	0.182	41.34	11038	6	89	2	[S100a8 - s100 calcium binding protein a8 (calgranulin a), S100a9 - s100 calcium binding protein a9 (calgranulin b)]
GO:0019732	antifungal humoral response	0.000944	0.179	41.34	11038	6	89	2	[Ltf - lactotransferrin, Camp - cathelicidin antimicrobial peptide]
GO:0042045	epithelial fluid transport	0.000944	0.177	41.34	11038	6	89	2	[Ednrb - endothelin receptor type b, Aqp1 - aquaporin 1]
GO:0050727	regulation of inflammatory response	0.000996	0.184	3.91	11038	254	89	8	[Fgfr1 - fibroblast growth factor receptor 1, Ednrb - endothelin receptor type b, Cma1 - chymase 1, mast cell, Egfr - epidermal growth factor receptor, C3 - complement component 3, Bcl6b - b cell cll/lymphoma 6, member b, S100a8 - s100 calcium binding protein a8 (calgranulin a), S100a9 - s100 calcium binding protein a9 (calgranulin b)]
GO:0060429	epithelium development	0.000997	0.182	6.53	11038	95	89	5	[Slc40a1 - solute carrier family 40 (iron-regulated transporter), member 1, Fgfr1 - fibroblast growth factor receptor 1, Aqp1 - aquaporin 1, Gja1 - gap junction protein, alpha 1, C3 - complement component 3]

## Sheet: 2 Gorilla v expressed
GO Term	Description	P-value	FDR q-value	Enrichment	N	B	n	b	Genes
GO:0006952	defense response	5.92e-17	8.2e-13	5.19	11038	633	121	36	[Fcgr2b - fc receptor, igg, low affinity iib, Ccl24 - chemokine (c-c motif) ligand 24, Ighm - immunoglobulin heavy constant mu, Isg15 - isg15 ubiquitin-like modifier, Ccl4 - chemokine (c-c motif) ligand 4, Gbp3 - guanylate binding protein 3, Cd209d - cd209d antigen, Ccl7 - chemokine (c-c motif) ligand 7, Ccl8 - chemokine (c-c motif) ligand 8, Tlr5 - toll-like receptor 5, Tpsb2 - tryptase beta 2, …
GO:0006955	immune response	1.37e-12	9.52e-09	4.9	11038	521	121	28	[Fcgr2b - fc receptor, igg, low affinity iib, Ccl24 - chemokine (c-c motif) ligand 24, Ighm - immunoglobulin heavy constant mu, Ccl4 - chemokine (c-c motif) ligand 4, Ccl7 - chemokine (c-c motif) ligand 7, Ccl8 - chemokine (c-c motif) ligand 8, Tlr5 - toll-like receptor 5, Ifitm3 - interferon induced transmembrane protein 3, Cxcl12 - chemokine (c-x-c motif) ligand 12, Ppbp - pro-platelet basic pr…
GO:0051707	response to other organism	1.99e-12	9.18e-09	5.52	11038	413	121	25	[Fcgr2b - fc receptor, igg, low affinity iib, Ighm - immunoglobulin heavy constant mu, Isg15 - isg15 ubiquitin-like modifier, Gbp3 - guanylate binding protein 3, Cd209d - cd209d antigen, Tlr5 - toll-like receptor 5, Ifitm3 - interferon induced transmembrane protein 3, Cxcl12 - chemokine (c-x-c motif) ligand 12, Ppbp - pro-platelet basic protein, Ighd - immunoglobulin heavy constant delta, Cfd - c…
GO:0051704	multi-organism process	9.4e-12	3.26e-08	4.36	11038	607	121	29	[Fcgr2b - fc receptor, igg, low affinity iib, Ighm - immunoglobulin heavy constant mu, Isg15 - isg15 ubiquitin-like modifier, Ccl4 - chemokine (c-c motif) ligand 4, Gbp3 - guanylate binding protein 3, Cd209d - cd209d antigen, Cd209e - cd209e antigen, Tlr5 - toll-like receptor 5, Ifitm3 - interferon induced transmembrane protein 3, Cxcl12 - chemokine (c-x-c motif) ligand 12, Ppbp - pro-platelet ba…
GO:0002376	immune system process	1.52e-11	4.21e-08	3.37	11038	1003	121	37	[Fcgr2b - fc receptor, igg, low affinity iib, Ccl24 - chemokine (c-c motif) ligand 24, Ighm - immunoglobulin heavy constant mu, Ccl4 - chemokine (c-c motif) ligand 4, Isg15 - isg15 ubiquitin-like modifier, Ccl7 - chemokine (c-c motif) ligand 7, Ccl8 - chemokine (c-c motif) ligand 8, Tlr5 - toll-like receptor 5, Ifitm3 - interferon induced transmembrane protein 3, Pla2g2d - phospholipase a2, group…
GO:0043207	response to external biotic stimulus	1.68e-11	3.88e-08	4.6	11038	536	121	27	[Fcgr2b - fc receptor, igg, low affinity iib, Zfp36 - zinc finger protein 36, Ighm - immunoglobulin heavy constant mu, Isg15 - isg15 ubiquitin-like modifier, Gbp3 - guanylate binding protein 3, Cd209d - cd209d antigen, Gstp1 - glutathione s-transferase, pi 1, Tlr5 - toll-like receptor 5, Ifitm3 - interferon induced transmembrane protein 3, Cxcl12 - chemokine (c-x-c motif) ligand 12, Ppbp - pro-pl…
GO:0070098	chemokine-mediated signaling pathway	2.79e-11	5.51e-08	26.48	11038	31	121	9	[Ccl24 - chemokine (c-c motif) ligand 24, Ccl4 - chemokine (c-c motif) ligand 4, Ppbp - pro-platelet basic protein, Ccl7 - chemokine (c-c motif) ligand 7, Ccl8 - chemokine (c-c motif) ligand 8, Pf4 - platelet factor 4, Ccl12 - chemokine (c-c motif) ligand 12, Cxcl12 - chemokine (c-x-c motif) ligand 12, Ccl2 - chemokine (c-c motif) ligand 2]
GO:0009607	response to biotic stimulus	3.9e-11	6.75e-08	4.43	11038	556	121	27	[Fcgr2b - fc receptor, igg, low affinity iib, Zfp36 - zinc finger protein 36, Ighm - immunoglobulin heavy constant mu, Isg15 - isg15 ubiquitin-like modifier, Gbp3 - guanylate binding protein 3, Cd209d - cd209d antigen, Gstp1 - glutathione s-transferase, pi 1, Tlr5 - toll-like receptor 5, Ifitm3 - interferon induced transmembrane protein 3, Cxcl12 - chemokine (c-x-c motif) ligand 12, Ppbp - pro-pl…
GO:0009617	response to bacterium	1.32e-10	2.03e-07	7.32	11038	212	121	17	[Fcgr2b - fc receptor, igg, low affinity iib, Mt2 - metallothionein 2, Ifit3 - interferon-induced protein with tetratricopeptide repeats 3, Ighm - immunoglobulin heavy constant mu, Isg15 - isg15 ubiquitin-like modifier, Gbp3 - guanylate binding protein 3, Cd209d - cd209d antigen, Cd209b - cd209b antigen, Tlr5 - toll-like receptor 5, Cebpb - ccaat/enhancer binding protein (c/ebp), beta, Trf - tran…
GO:0072677	eosinophil migration	3.1e-10	4.3e-07	54.73	11038	10	121	6	[Ccl24 - chemokine (c-c motif) ligand 24, Ccl4 - chemokine (c-c motif) ligand 4, Ccl7 - chemokine (c-c motif) ligand 7, Ccl8 - chemokine (c-c motif) ligand 8, Ccl12 - chemokine (c-c motif) ligand 12, Ccl2 - chemokine (c-c motif) ligand 2]
GO:0048245	eosinophil chemotaxis	3.1e-10	3.91e-07	54.73	11038	10	121	6	[Ccl24 - chemokine (c-c motif) ligand 24, Ccl4 - chemokine (c-c motif) ligand 4, Ccl7 - chemokine (c-c motif) ligand 7, Ccl8 - chemokine (c-c motif) ligand 8, Ccl12 - chemokine (c-c motif) ligand 12, Ccl2 - chemokine (c-c motif) ligand 2]
GO:0006950	response to stress	9.59e-10	1.11e-06	2.36	11038	1894	121	49	[Fcgr2b - fc receptor, igg, low affinity iib, Zfp36 - zinc finger protein 36, Ighm - immunoglobulin heavy constant mu, Foxred2 - fad-dependent oxidoreductase domain containing 2, Ifitm3 - interferon induced transmembrane protein 3, Cd163 - cd163 antigen, Tpsb2 - tryptase beta 2, Cd1d1 - cd1d1 antigen, Cd38 - cd38 antigen, Egr1 - early growth response 1, Fh1 - fumarate hydratase 1, Jun - jun oncog…
GO:0009605	response to external stimulus	4.15e-09	4.42e-06	3.27	11038	836	121	30	[Fcgr2b - fc receptor, igg, low affinity iib, Zfp36 - zinc finger protein 36, Ighm - immunoglobulin heavy constant mu, Isg15 - isg15 ubiquitin-like modifier, Gbp3 - guanylate binding protein 3, Cd209d - cd209d antigen, Gstp1 - glutathione s-transferase, pi 1, Tlr5 - toll-like receptor 5, Ifitm3 - interferon induced transmembrane protein 3, Cxcl12 - chemokine (c-x-c motif) ligand 12, Ppbp - pro-pl…
GO:0048247	lymphocyte chemotaxis	4.74e-09	4.69e-06	26.61	11038	24	121	7	[Ccl24 - chemokine (c-c motif) ligand 24, Ccl4 - chemokine (c-c motif) ligand 4, Ccl7 - chemokine (c-c motif) ligand 7, Ccl8 - chemokine (c-c motif) ligand 8, Ccl12 - chemokine (c-c motif) ligand 12, Cxcl12 - chemokine (c-x-c motif) ligand 12, Ccl2 - chemokine (c-c motif) ligand 2]
GO:1990266	neutrophil migration	5e-09	4.62e-06	15.49	11038	53	121	9	[Ccl24 - chemokine (c-c motif) ligand 24, Ccl4 - chemokine (c-c motif) ligand 4, Ppbp - pro-platelet basic protein, Ccl7 - chemokine (c-c motif) ligand 7, Ccl8 - chemokine (c-c motif) ligand 8, Mcoln2 - mucolipin 2, Pf4 - platelet factor 4, Ccl12 - chemokine (c-c motif) ligand 12, Ccl2 - chemokine (c-c motif) ligand 2]
GO:0098542	defense response to other organism	5.49e-09	4.75e-06	5.74	11038	270	121	17	[Ifit3 - interferon-induced protein with tetratricopeptide repeats 3, Ighm - immunoglobulin heavy constant mu, Isg15 - isg15 ubiquitin-like modifier, Gbp3 - guanylate binding protein 3, Cd209d - cd209d antigen, Tlr5 - toll-like receptor 5, Pf4 - platelet factor 4, Ifitm3 - interferon induced transmembrane protein 3, Cebpb - ccaat/enhancer binding protein (c/ebp), beta, Tspan32 - tetraspanin 32, T…
GO:0050896	response to stimulus	6.64e-09	5.41e-06	1.92	11038	2944	121	62	[Fcgr2b - fc receptor, igg, low affinity iib, Zfp36 - zinc finger protein 36, Ighm - immunoglobulin heavy constant mu, Foxred2 - fad-dependent oxidoreductase domain containing 2, Ifitm3 - interferon induced transmembrane protein 3, Cd163 - cd163 antigen, Chrna5 - cholinergic receptor, nicotinic, alpha polypeptide 5, Tpsb2 - tryptase beta 2, Cd1d1 - cd1d1 antigen, Chp2 - calcineurin-like ef hand p…
GO:0019221	cytokine-mediated signaling pathway	7.02e-09	5.4e-06	7.26	11038	176	121	14	[Ccl24 - chemokine (c-c motif) ligand 24, Ccl4 - chemokine (c-c motif) ligand 4, Ccl7 - chemokine (c-c motif) ligand 7, Ccl8 - chemokine (c-c motif) ligand 8, Pf4 - platelet factor 4, Plvap - plasmalemma vesicle associated protein, Ifitm3 - interferon induced transmembrane protein 3, Ugcg - udp-glucose ceramide glucosyltransferase, Egr1 - early growth response 1, Cxcl12 - chemokine (c-x-c motif) …
GO:0097530	granulocyte migration	1.34e-08	9.79e-06	13.92	11038	59	121	9	[Ccl24 - chemokine (c-c motif) ligand 24, Ccl4 - chemokine (c-c motif) ligand 4, Ppbp - pro-platelet basic protein, Ccl7 - chemokine (c-c motif) ligand 7, Ccl8 - chemokine (c-c motif) ligand 8, Mcoln2 - mucolipin 2, Pf4 - platelet factor 4, Ccl12 - chemokine (c-c motif) ligand 12, Ccl2 - chemokine (c-c motif) ligand 2]
GO:0006959	humoral immune response	1.49e-08	1.03e-05	11.4	11038	80	121	10	[Ighm - immunoglobulin heavy constant mu, Trf - transferrin, Ppbp - pro-platelet basic protein, Ighd - immunoglobulin heavy constant delta, Pf4 - platelet factor 4, Tslp - thymic stromal lymphopoietin, Cfd - complement factor d (adipsin), Cfp - complement factor properdin, Ccl2 - chemokine (c-c motif) ligand 2, Cxcl12 - chemokine (c-x-c motif) ligand 12]
GO:0002548	monocyte chemotaxis	3.7e-08	2.44e-05	28.81	11038	19	121	6	[Ccl24 - chemokine (c-c motif) ligand 24, Ccl4 - chemokine (c-c motif) ligand 4, Ccl7 - chemokine (c-c motif) ligand 7, Ccl8 - chemokine (c-c motif) ligand 8, Ccl12 - chemokine (c-c motif) ligand 12, Ccl2 - chemokine (c-c motif) ligand 2]
GO:0030593	neutrophil chemotaxis	4.32e-08	2.72e-05	15.2	11038	48	121	8	[Ccl24 - chemokine (c-c motif) ligand 24, Ccl4 - chemokine (c-c motif) ligand 4, Ppbp - pro-platelet basic protein, Ccl7 - chemokine (c-c motif) ligand 7, Ccl8 - chemokine (c-c motif) ligand 8, Pf4 - platelet factor 4, Ccl12 - chemokine (c-c motif) ligand 12, Ccl2 - chemokine (c-c motif) ligand 2]
GO:0043410	positive regulation of MAPK cascade	7.78e-08	4.69e-05	4.8	11038	323	121	17	[Fcgr2b - fc receptor, igg, low affinity iib, Ccl24 - chemokine (c-c motif) ligand 24, Ighm - immunoglobulin heavy constant mu, Ccl4 - chemokine (c-c motif) ligand 4, Ccl7 - chemokine (c-c motif) ligand 7, Ccl8 - chemokine (c-c motif) ligand 8, C1qtnf1 - c1q and tumor necrosis factor related protein 1, Cxcl12 - chemokine (c-x-c motif) ligand 12, Jun - jun oncogene, Gadd45g - growth arrest and dna…
GO:0097529	myeloid leukocyte migration	9.12e-08	5.27e-05	11.25	11038	73	121	9	[Ccl24 - chemokine (c-c motif) ligand 24, Ccl4 - chemokine (c-c motif) ligand 4, Ppbp - pro-platelet basic protein, Ccl7 - chemokine (c-c motif) ligand 7, Ccl8 - chemokine (c-c motif) ligand 8, Mcoln2 - mucolipin 2, Pf4 - platelet factor 4, Ccl12 - chemokine (c-c motif) ligand 12, Ccl2 - chemokine (c-c motif) ligand 2]
GO:0071621	granulocyte chemotaxis	9.7e-08	5.37e-05	13.77	11038	53	121	8	[Ccl24 - chemokine (c-c motif) ligand 24, Ccl4 - chemokine (c-c motif) ligand 4, Ppbp - pro-platelet basic protein, Ccl7 - chemokine (c-c motif) ligand 7, Ccl8 - chemokine (c-c motif) ligand 8, Pf4 - platelet factor 4, Ccl12 - chemokine (c-c motif) ligand 12, Ccl2 - chemokine (c-c motif) ligand 2]
GO:0071674	mononuclear cell migration	9.9e-08	5.28e-05	24.88	11038	22	121	6	[Ccl24 - chemokine (c-c motif) ligand 24, Ccl4 - chemokine (c-c motif) ligand 4, Ccl7 - chemokine (c-c motif) ligand 7, Ccl8 - chemokine (c-c motif) ligand 8, Ccl12 - chemokine (c-c motif) ligand 12, Ccl2 - chemokine (c-c motif) ligand 2]
GO:0002684	positive regulation of immune system process	1.4e-07	7.16e-05	3.46	11038	606	121	23	[Fcgr2b - fc receptor, igg, low affinity iib, Ccl24 - chemokine (c-c motif) ligand 24, Cd38 - cd38 antigen, Ighm - immunoglobulin heavy constant mu, Mmp9 - matrix metallopeptidase 9, Isg15 - isg15 ubiquitin-like modifier, Ccl4 - chemokine (c-c motif) ligand 4, Cd209e - cd209e antigen, Fos - fbj osteosarcoma oncogene, Pf4 - platelet factor 4, Tlr5 - toll-like receptor 5, Plvap - plasmalemma vesicl…
GO:0034097	response to cytokine	1.42e-07	7.04e-05	4.12	11038	421	121	19	[Ccl24 - chemokine (c-c motif) ligand 24, Ifit3 - interferon-induced protein with tetratricopeptide repeats 3, Zfp36 - zinc finger protein 36, Isg15 - isg15 ubiquitin-like modifier, Ccl4 - chemokine (c-c motif) ligand 4, Gbp3 - guanylate binding protein 3, Ccl7 - chemokine (c-c motif) ligand 7, Ccl8 - chemokine (c-c motif) ligand 8, Pcolce - procollagen c-endopeptidase enhancer protein, Ifitm3 - …
GO:0060326	cell chemotaxis	1.43e-07	6.85e-05	7.84	11038	128	121	11	[Ccl24 - chemokine (c-c motif) ligand 24, Ccl4 - chemokine (c-c motif) ligand 4, Ppbp - pro-platelet basic protein, Ccl7 - chemokine (c-c motif) ligand 7, Ccl8 - chemokine (c-c motif) ligand 8, Hbegf - heparin-binding egf-like growth factor, Lpar1 - lysophosphatidic acid receptor 1, Pf4 - platelet factor 4, Ccl12 - chemokine (c-c motif) ligand 12, Ccl2 - chemokine (c-c motif) ligand 2, Cxcl12 - c…
GO:0071347	cellular response to interleukin-1	1.52e-07	7.02e-05	16.8	11038	38	121	7	[Cebpb - ccaat/enhancer binding protein (c/ebp), beta, Ccl24 - chemokine (c-c motif) ligand 24, Ccl4 - chemokine (c-c motif) ligand 4, Ccl7 - chemokine (c-c motif) ligand 7, Ccl8 - chemokine (c-c motif) ligand 8, Ccl12 - chemokine (c-c motif) ligand 12, Ccl2 - chemokine (c-c motif) ligand 2]
GO:0072676	lymphocyte migration	2.21e-07	9.86e-05	15.96	11038	40	121	7	[Ccl24 - chemokine (c-c motif) ligand 24, Ccl4 - chemokine (c-c motif) ligand 4, Ccl7 - chemokine (c-c motif) ligand 7, Ccl8 - chemokine (c-c motif) ligand 8, Ccl12 - chemokine (c-c motif) ligand 12, Cxcl12 - chemokine (c-x-c motif) ligand 12, Ccl2 - chemokine (c-c motif) ligand 2]
GO:0007165	signal transduction	2.57e-07	0.000111	2.1	11038	1956	121	45	[Fcgr2b - fc receptor, igg, low affinity iib, Ccl24 - chemokine (c-c motif) ligand 24, Gprc5c - g protein-coupled receptor, family c, group 5, member c, Zfp36 - zinc finger protein 36, Ighm - immunoglobulin heavy constant mu, Ccl4 - chemokine (c-c motif) ligand 4, Isg15 - isg15 ubiquitin-like modifier, Ccl7 - chemokine (c-c motif) ligand 7, Ccl8 - chemokine (c-c motif) ligand 8, Gfra2 - glial cel…
GO:0071356	cellular response to tumor necrosis factor	3.87e-07	0.000162	11.58	11038	63	121	8	[Ccl24 - chemokine (c-c motif) ligand 24, Zfp36 - zinc finger protein 36, Ccl4 - chemokine (c-c motif) ligand 4, Ccl7 - chemokine (c-c motif) ligand 7, Ccl8 - chemokine (c-c motif) ligand 8, Ccl12 - chemokine (c-c motif) ligand 12, Ccl2 - chemokine (c-c motif) ligand 2, Zfp36l1 - zinc finger protein 36, c3h type-like 1]
GO:0002682	regulation of immune system process	4.45e-07	0.000181	2.79	11038	915	121	28	[Fcgr2b - fc receptor, igg, low affinity iib, Ccl24 - chemokine (c-c motif) ligand 24, Zfp36 - zinc finger protein 36, Ighm - immunoglobulin heavy constant mu, Ccl4 - chemokine (c-c motif) ligand 4, Isg15 - isg15 ubiquitin-like modifier, Cd209e - cd209e antigen, Tlr5 - toll-like receptor 5, Pla2g2d - phospholipase a2, group iid, Cxcl12 - chemokine (c-x-c motif) ligand 12, Cd1d1 - cd1d1 antigen, I…
GO:0030595	leukocyte chemotaxis	5.68e-07	0.000225	9.12	11038	90	121	9	[Ccl24 - chemokine (c-c motif) ligand 24, Ccl4 - chemokine (c-c motif) ligand 4, Ppbp - pro-platelet basic protein, Ccl7 - chemokine (c-c motif) ligand 7, Ccl8 - chemokine (c-c motif) ligand 8, Pf4 - platelet factor 4, Ccl12 - chemokine (c-c motif) ligand 12, Ccl2 - chemokine (c-c motif) ligand 2, Cxcl12 - chemokine (c-x-c motif) ligand 12]
GO:0006935	chemotaxis	5.76e-07	0.000222	6.12	11038	179	121	12	[Ccl24 - chemokine (c-c motif) ligand 24, Ccl4 - chemokine (c-c motif) ligand 4, Ppbp - pro-platelet basic protein, Ccl7 - chemokine (c-c motif) ligand 7, Ccl8 - chemokine (c-c motif) ligand 8, Hbegf - heparin-binding egf-like growth factor, Lpar1 - lysophosphatidic acid receptor 1, Pf4 - platelet factor 4, Sema4a - sema domain, immunoglobulin domain (ig), transmembrane domain (tm) and short cyto…
GO:0043408	regulation of MAPK cascade	6.15e-07	0.00023	3.74	11038	463	121	19	[Fcgr2b - fc receptor, igg, low affinity iib, Ccl24 - chemokine (c-c motif) ligand 24, Ighm - immunoglobulin heavy constant mu, Ccl4 - chemokine (c-c motif) ligand 4, Ccl7 - chemokine (c-c motif) ligand 7, Ccl8 - chemokine (c-c motif) ligand 8, Gstp1 - glutathione s-transferase, pi 1, C1qtnf1 - c1q and tumor necrosis factor related protein 1, Cxcl12 - chemokine (c-x-c motif) ligand 12, Dok2 - doc…
GO:0051240	positive regulation of multicellular organismal process	6.24e-07	0.000228	2.51	11038	1165	121	32	[Ccl24 - chemokine (c-c motif) ligand 24, Ccl4 - chemokine (c-c motif) ligand 4, Isg15 - isg15 ubiquitin-like modifier, Cd209d - cd209d antigen, Tlr5 - toll-like receptor 5, Lum - lumican, Cxcl12 - chemokine (c-x-c motif) ligand 12, Cd1d1 - cd1d1 antigen, Zfp36l1 - zinc finger protein 36, c3h type-like 1, Cd38 - cd38 antigen, Mmp9 - matrix metallopeptidase 9, Cd209b - cd209b antigen, Fos - fbj os…
GO:0042127	regulation of cell proliferation	6.26e-07	0.000222	2.62	11038	1046	121	30	[Fcgr2b - fc receptor, igg, low affinity iib, Ccl24 - chemokine (c-c motif) ligand 24, Zfp36 - zinc finger protein 36, Ighm - immunoglobulin heavy constant mu, Cd209e - cd209e antigen, Gstp1 - glutathione s-transferase, pi 1, Ifitm3 - interferon induced transmembrane protein 3, Pla2g2d - phospholipase a2, group iid, Cxcl12 - chemokine (c-x-c motif) ligand 12, Lifr - leukemia inhibitory factor rec…
GO:0042330	taxis	6.49e-07	0.000225	6.05	11038	181	121	12	[Ccl24 - chemokine (c-c motif) ligand 24, Ccl4 - chemokine (c-c motif) ligand 4, Ppbp - pro-platelet basic protein, Ccl7 - chemokine (c-c motif) ligand 7, Ccl8 - chemokine (c-c motif) ligand 8, Hbegf - heparin-binding egf-like growth factor, Lpar1 - lysophosphatidic acid receptor 1, Pf4 - platelet factor 4, Sema4a - sema domain, immunoglobulin domain (ig), transmembrane domain (tm) and short cyto…
GO:0071345	cellular response to cytokine stimulus	6.91e-07	0.000234	4.37	11038	334	121	16	[Ccl24 - chemokine (c-c motif) ligand 24, Ifit3 - interferon-induced protein with tetratricopeptide repeats 3, Zfp36 - zinc finger protein 36, Ccl4 - chemokine (c-c motif) ligand 4, Gbp3 - guanylate binding protein 3, Ccl7 - chemokine (c-c motif) ligand 7, Ccl8 - chemokine (c-c motif) ligand 8, Pcolce - procollagen c-endopeptidase enhancer protein, Egr1 - early growth response 1, Cxcl12 - chemoki…
GO:0001934	positive regulation of protein phosphorylation	7.48e-07	0.000247	3.26	11038	615	121	22	[Fcgr2b - fc receptor, igg, low affinity iib, Ccl24 - chemokine (c-c motif) ligand 24, Ighm - immunoglobulin heavy constant mu, Mmp9 - matrix metallopeptidase 9, Ccl4 - chemokine (c-c motif) ligand 4, Ccl7 - chemokine (c-c motif) ligand 7, Ccl8 - chemokine (c-c motif) ligand 8, Hbegf - heparin-binding egf-like growth factor, Gfra2 - glial cell line derived neurotrophic factor family receptor alph…
GO:0071276	cellular response to cadmium ion	1.11e-06	0.000359	25.34	11038	18	121	5	[Mt2 - metallothionein 2, Jun - jun oncogene, Mmp9 - matrix metallopeptidase 9, Fos - fbj osteosarcoma oncogene, Mt1 - metallothionein 1]
GO:0050900	leukocyte migration	1.14e-06	0.000358	7.24	11038	126	121	10	[Ccl24 - chemokine (c-c motif) ligand 24, Ccl4 - chemokine (c-c motif) ligand 4, Ppbp - pro-platelet basic protein, Ccl7 - chemokine (c-c motif) ligand 7, Ccl8 - chemokine (c-c motif) ligand 8, Mcoln2 - mucolipin 2, Pf4 - platelet factor 4, Ccl12 - chemokine (c-c motif) ligand 12, Ccl2 - chemokine (c-c motif) ligand 2, Cxcl12 - chemokine (c-x-c motif) ligand 12]
GO:0001817	regulation of cytokine production	1.63e-06	0.000501	3.51	11038	494	121	19	[Fcgr2b - fc receptor, igg, low affinity iib, Zfp36 - zinc finger protein 36, Isg15 - isg15 ubiquitin-like modifier, Ccl4 - chemokine (c-c motif) ligand 4, Cd209d - cd209d antigen, Cd209b - cd209b antigen, Gstp1 - glutathione s-transferase, pi 1, Mcoln2 - mucolipin 2, Pf4 - platelet factor 4, Tlr5 - toll-like receptor 5, Lum - lumican, Egr1 - early growth response 1, Cebpb - ccaat/enhancer bindin…
GO:0045937	positive regulation of phosphate metabolic process	2.13e-06	0.000643	2.96	11038	708	121	23	[Fcgr2b - fc receptor, igg, low affinity iib, Ccl24 - chemokine (c-c motif) ligand 24, Ighm - immunoglobulin heavy constant mu, Mmp9 - matrix metallopeptidase 9, Ccl4 - chemokine (c-c motif) ligand 4, Ccl7 - chemokine (c-c motif) ligand 7, Ccl8 - chemokine (c-c motif) ligand 8, Hbegf - heparin-binding egf-like growth factor, Gfra2 - glial cell line derived neurotrophic factor family receptor alph…
GO:0010562	positive regulation of phosphorus metabolic process	2.13e-06	0.000629	2.96	11038	708	121	23	[Fcgr2b - fc receptor, igg, low affinity iib, Ccl24 - chemokine (c-c motif) ligand 24, Ighm - immunoglobulin heavy constant mu, Mmp9 - matrix metallopeptidase 9, Ccl4 - chemokine (c-c motif) ligand 4, Ccl7 - chemokine (c-c motif) ligand 7, Ccl8 - chemokine (c-c motif) ligand 8, Hbegf - heparin-binding egf-like growth factor, Gfra2 - glial cell line derived neurotrophic factor family receptor alph…
GO:0007166	cell surface receptor signaling pathway	2.17e-06	0.000626	2.64	11038	932	121	27	[Fcgr2b - fc receptor, igg, low affinity iib, Ccl24 - chemokine (c-c motif) ligand 24, Ighm - immunoglobulin heavy constant mu, Ccl4 - chemokine (c-c motif) ligand 4, Isg15 - isg15 ubiquitin-like modifier, Ccl7 - chemokine (c-c motif) ligand 7, Ccl8 - chemokine (c-c motif) ligand 8, Gfra2 - glial cell line derived neurotrophic factor family receptor alpha 2, Ifitm3 - interferon induced transmembr…
GO:0042327	positive regulation of phosphorylation	2.31e-06	0.000652	3.05	11038	658	121	22	[Fcgr2b - fc receptor, igg, low affinity iib, Ccl24 - chemokine (c-c motif) ligand 24, Ighm - immunoglobulin heavy constant mu, Mmp9 - matrix metallopeptidase 9, Ccl4 - chemokine (c-c motif) ligand 4, Ccl7 - chemokine (c-c motif) ligand 7, Ccl8 - chemokine (c-c motif) ligand 8, Hbegf - heparin-binding egf-like growth factor, Gfra2 - glial cell line derived neurotrophic factor family receptor alph…
GO:0006954	inflammatory response	2.58e-06	0.000715	4.86	11038	244	121	13	[Ccl24 - chemokine (c-c motif) ligand 24, Ccl4 - chemokine (c-c motif) ligand 4, Ccl7 - chemokine (c-c motif) ligand 7, Ccl8 - chemokine (c-c motif) ligand 8, Tlr5 - toll-like receptor 5, Pf4 - platelet factor 4, Cd163 - cd163 antigen, Tpsb2 - tryptase beta 2, Pla2g2d - phospholipase a2, group iid, Ppbp - pro-platelet basic protein, Ptgs1 - prostaglandin-endoperoxide synthase 1, Ccl12 - chemokine…
GO:0070555	response to interleukin-1	2.68e-06	0.000729	11.2	11038	57	121	7	[Cebpb - ccaat/enhancer binding protein (c/ebp), beta, Ccl24 - chemokine (c-c motif) ligand 24, Ccl4 - chemokine (c-c motif) ligand 4, Ccl7 - chemokine (c-c motif) ligand 7, Ccl8 - chemokine (c-c motif) ligand 8, Ccl12 - chemokine (c-c motif) ligand 12, Ccl2 - chemokine (c-c motif) ligand 2]
GO:0034612	response to tumor necrosis factor	3.28e-06	0.000874	8.79	11038	83	121	8	[Ccl24 - chemokine (c-c motif) ligand 24, Zfp36 - zinc finger protein 36, Ccl4 - chemokine (c-c motif) ligand 4, Ccl7 - chemokine (c-c motif) ligand 7, Ccl8 - chemokine (c-c motif) ligand 8, Ccl12 - chemokine (c-c motif) ligand 12, Ccl2 - chemokine (c-c motif) ligand 2, Zfp36l1 - zinc finger protein 36, c3h type-like 1]
GO:0034341	response to interferon-gamma	4.29e-06	0.00112	8.49	11038	86	121	8	[Ccl24 - chemokine (c-c motif) ligand 24, Ccl4 - chemokine (c-c motif) ligand 4, Ccl7 - chemokine (c-c motif) ligand 7, Gbp3 - guanylate binding protein 3, Ccl8 - chemokine (c-c motif) ligand 8, Ccl12 - chemokine (c-c motif) ligand 12, Ifitm3 - interferon induced transmembrane protein 3, Ccl2 - chemokine (c-c motif) ligand 2]
GO:0070887	cellular response to chemical stimulus	4.37e-06	0.00112	2.43	11038	1087	121	29	[Fcgr2b - fc receptor, igg, low affinity iib, Ccl24 - chemokine (c-c motif) ligand 24, Zfp36 - zinc finger protein 36, Ccl4 - chemokine (c-c motif) ligand 4, Ccl7 - chemokine (c-c motif) ligand 7, Gbp3 - guanylate binding protein 3, Ccl8 - chemokine (c-c motif) ligand 8, Gstp1 - glutathione s-transferase, pi 1, Cxcl12 - chemokine (c-x-c motif) ligand 12, Ppbp - pro-platelet basic protein, Chp2 - …
GO:0035710	CD4-positive, alpha-beta T cell activation	5.24e-06	0.00132	19	11038	24	121	5	[Cebpb - ccaat/enhancer binding protein (c/ebp), beta, Gadd45g - growth arrest and dna-damage-inducible 45 gamma, Sema4a - sema domain, immunoglobulin domain (ig), transmembrane domain (tm) and short cytoplasmic domain, (semaphorin) 4a, Rsad2 - radical s-adenosyl methionine domain containing 2, Pla2g2d - phospholipase a2, group iid]
GO:0019730	antimicrobial humoral response	5.82e-06	0.00144	13.03	11038	42	121	6	[Ppbp - pro-platelet basic protein, Trf - transferrin, Pf4 - platelet factor 4, Tslp - thymic stromal lymphopoietin, Cxcl12 - chemokine (c-x-c motif) ligand 12, Ccl2 - chemokine (c-c motif) ligand 2]
GO:0046631	alpha-beta T cell activation	5.82e-06	0.00141	13.03	11038	42	121	6	[Cebpb - ccaat/enhancer binding protein (c/ebp), beta, Gadd45g - growth arrest and dna-damage-inducible 45 gamma, Cd1d1 - cd1d1 antigen, Sema4a - sema domain, immunoglobulin domain (ig), transmembrane domain (tm) and short cytoplasmic domain, (semaphorin) 4a, Rsad2 - radical s-adenosyl methionine domain containing 2, Pla2g2d - phospholipase a2, group iid]
GO:0046686	response to cadmium ion	6.49e-06	0.00155	18.24	11038	25	121	5	[Mt2 - metallothionein 2, Jun - jun oncogene, Mmp9 - matrix metallopeptidase 9, Fos - fbj osteosarcoma oncogene, Mt1 - metallothionein 1]
GO:0002252	immune effector process	6.91e-06	0.00162	4.13	11038	309	121	14	[Fcgr2b - fc receptor, igg, low affinity iib, Ifit3 - interferon-induced protein with tetratricopeptide repeats 3, Ighm - immunoglobulin heavy constant mu, Isg15 - isg15 ubiquitin-like modifier, Sema4a - sema domain, immunoglobulin domain (ig), transmembrane domain (tm) and short cytoplasmic domain, (semaphorin) 4a, Ifitm3 - interferon induced transmembrane protein 3, Cfp - complement factor prop…
GO:0045087	innate immune response	7.17e-06	0.00165	4.12	11038	310	121	14	[Ifit3 - interferon-induced protein with tetratricopeptide repeats 3, Ighm - immunoglobulin heavy constant mu, Mcoln2 - mucolipin 2, Tlr5 - toll-like receptor 5, Ifitm3 - interferon induced transmembrane protein 3, Cfp - complement factor properdin, Cd1d1 - cd1d1 antigen, Clec4n - c-type lectin domain family 4, member n, Ighd - immunoglobulin heavy constant delta, Oasl1 - 2'-5' oligoadenylate syn…
GO:0042742	defense response to bacterium	8.36e-06	0.0019	6.62	11038	124	121	9	[Cebpb - ccaat/enhancer binding protein (c/ebp), beta, Ighm - immunoglobulin heavy constant mu, Isg15 - isg15 ubiquitin-like modifier, Trf - transferrin, Gbp3 - guanylate binding protein 3, Cd209d - cd209d antigen, Ighd - immunoglobulin heavy constant delta, Tlr5 - toll-like receptor 5, Tslp - thymic stromal lymphopoietin]
GO:0071346	cellular response to interferon-gamma	8.91e-06	0.00199	9.39	11038	68	121	7	[Ccl24 - chemokine (c-c motif) ligand 24, Ccl4 - chemokine (c-c motif) ligand 4, Ccl7 - chemokine (c-c motif) ligand 7, Gbp3 - guanylate binding protein 3, Ccl8 - chemokine (c-c motif) ligand 8, Ccl12 - chemokine (c-c motif) ligand 12, Ccl2 - chemokine (c-c motif) ligand 2]
GO:1902533	positive regulation of intracellular signal transduction	9.38e-06	0.00206	2.89	11038	663	121	21	[Fcgr2b - fc receptor, igg, low affinity iib, Ccl24 - chemokine (c-c motif) ligand 24, Ighm - immunoglobulin heavy constant mu, Ccl4 - chemokine (c-c motif) ligand 4, Ccl7 - chemokine (c-c motif) ligand 7, Ccl8 - chemokine (c-c motif) ligand 8, Hbegf - heparin-binding egf-like growth factor, C1qtnf1 - c1q and tumor necrosis factor related protein 1, Cxcl12 - chemokine (c-x-c motif) ligand 12, Jun…
GO:0070374	positive regulation of ERK1 and ERK2 cascade	9.52e-06	0.00206	6.52	11038	126	121	9	[Jun - jun oncogene, Ccl24 - chemokine (c-c motif) ligand 24, Ccl4 - chemokine (c-c motif) ligand 4, Ccl7 - chemokine (c-c motif) ligand 7, Ccl8 - chemokine (c-c motif) ligand 8, Ccl12 - chemokine (c-c motif) ligand 12, Marco - macrophage receptor with collagenous structure, Ccl2 - chemokine (c-c motif) ligand 2, Cxcl12 - chemokine (c-x-c motif) ligand 12]
GO:0001819	positive regulation of cytokine production	1.03e-05	0.00219	3.99	11038	320	121	14	[Ccl4 - chemokine (c-c motif) ligand 4, Cd209d - cd209d antigen, Cd209b - cd209b antigen, Mcoln2 - mucolipin 2, Tlr5 - toll-like receptor 5, Pf4 - platelet factor 4, Lum - lumican, Egr1 - early growth response 1, Cebpb - ccaat/enhancer binding protein (c/ebp), beta, Cd1d1 - cd1d1 antigen, Clec4n - c-type lectin domain family 4, member n, Rsad2 - radical s-adenosyl methionine domain containing 2, …
GO:0070663	regulation of leukocyte proliferation	1.67e-05	0.00351	5.37	11038	170	121	10	[Fcgr2b - fc receptor, igg, low affinity iib, Cebpb - ccaat/enhancer binding protein (c/ebp), beta, Cd38 - cd38 antigen, Ighm - immunoglobulin heavy constant mu, Cd1d1 - cd1d1 antigen, Cd209e - cd209e antigen, Gstp1 - glutathione s-transferase, pi 1, Ighd - immunoglobulin heavy constant delta, Ccl12 - chemokine (c-c motif) ligand 12, Pla2g2d - phospholipase a2, group iid]
GO:0048584	positive regulation of response to stimulus	2.09e-05	0.00433	2.13	11038	1373	121	32	[Fcgr2b - fc receptor, igg, low affinity iib, Ccl24 - chemokine (c-c motif) ligand 24, Ighm - immunoglobulin heavy constant mu, Ccl4 - chemokine (c-c motif) ligand 4, Ccl7 - chemokine (c-c motif) ligand 7, Ccl8 - chemokine (c-c motif) ligand 8, Tlr5 - toll-like receptor 5, Cxcl12 - chemokine (c-x-c motif) ligand 12, Cd1d1 - cd1d1 antigen, Chp2 - calcineurin-like ef hand protein 2, Ighd - immunogl…
GO:0046632	alpha-beta T cell differentiation	2.32e-05	0.00472	14.25	11038	32	121	5	[Gadd45g - growth arrest and dna-damage-inducible 45 gamma, Cd1d1 - cd1d1 antigen, Sema4a - sema domain, immunoglobulin domain (ig), transmembrane domain (tm) and short cytoplasmic domain, (semaphorin) 4a, Rsad2 - radical s-adenosyl methionine domain containing 2, Pla2g2d - phospholipase a2, group iid]
GO:0042221	response to chemical	2.46e-05	0.00495	2.01	11038	1586	121	35	[Fcgr2b - fc receptor, igg, low affinity iib, Ccl24 - chemokine (c-c motif) ligand 24, Zfp36 - zinc finger protein 36, Ccl4 - chemokine (c-c motif) ligand 4, Isg15 - isg15 ubiquitin-like modifier, Ccl7 - chemokine (c-c motif) ligand 7, Gbp3 - guanylate binding protein 3, Ccl8 - chemokine (c-c motif) ligand 8, Gstp1 - glutathione s-transferase, pi 1, Foxred2 - fad-dependent oxidoreductase domain c…
GO:0061844	antimicrobial humoral immune response mediated by antimicrobial peptide	3.14e-05	0.00622	13.42	11038	34	121	5	[Ppbp - pro-platelet basic protein, Pf4 - platelet factor 4, Tslp - thymic stromal lymphopoietin, Cxcl12 - chemokine (c-x-c motif) ligand 12, Ccl2 - chemokine (c-c motif) ligand 2]
GO:0010647	positive regulation of cell communication	3.62e-05	0.00706	2.27	11038	1086	121	27	[Fcgr2b - fc receptor, igg, low affinity iib, Ccl24 - chemokine (c-c motif) ligand 24, Ighm - immunoglobulin heavy constant mu, Ccl4 - chemokine (c-c motif) ligand 4, Ccl7 - chemokine (c-c motif) ligand 7, Ccl8 - chemokine (c-c motif) ligand 8, Tlr5 - toll-like receptor 5, Cxcl12 - chemokine (c-x-c motif) ligand 12, Chp2 - calcineurin-like ef hand protein 2, Marco - macrophage receptor with colla…
GO:0048525	negative regulation of viral process	3.89e-05	0.00748	7.51	11038	85	121	7	[Jun - jun oncogene, Zfp36 - zinc finger protein 36, Isg15 - isg15 ubiquitin-like modifier, Ccl4 - chemokine (c-c motif) ligand 4, Oasl1 - 2'-5' oligoadenylate synthetase-like 1, Rsad2 - radical s-adenosyl methionine domain containing 2, Ifitm3 - interferon induced transmembrane protein 3]
GO:0023056	positive regulation of signaling	4.12e-05	0.00781	2.25	11038	1094	121	27	[Fcgr2b - fc receptor, igg, low affinity iib, Ccl24 - chemokine (c-c motif) ligand 24, Ighm - immunoglobulin heavy constant mu, Ccl4 - chemokine (c-c motif) ligand 4, Ccl7 - chemokine (c-c motif) ligand 7, Ccl8 - chemokine (c-c motif) ligand 8, Tlr5 - toll-like receptor 5, Cxcl12 - chemokine (c-x-c motif) ligand 12, Chp2 - calcineurin-like ef hand protein 2, Marco - macrophage receptor with colla…
GO:0070372	regulation of ERK1 and ERK2 cascade	4.17e-05	0.0078	4.83	11038	189	121	10	[Jun - jun oncogene, Ccl24 - chemokine (c-c motif) ligand 24, Ccl4 - chemokine (c-c motif) ligand 4, Ccl7 - chemokine (c-c motif) ligand 7, Ccl8 - chemokine (c-c motif) ligand 8, Gstp1 - glutathione s-transferase, pi 1, Ccl12 - chemokine (c-c motif) ligand 12, Marco - macrophage receptor with collagenous structure, Ccl2 - chemokine (c-c motif) ligand 2, Cxcl12 - chemokine (c-x-c motif) ligand 12]
GO:0071248	cellular response to metal ion	4.87e-05	0.00899	7.26	11038	88	121	7	[Mt2 - metallothionein 2, Jun - jun oncogene, Mmp9 - matrix metallopeptidase 9, Trf - transferrin, Chp2 - calcineurin-like ef hand protein 2, Fos - fbj osteosarcoma oncogene, Mt1 - metallothionein 1]
GO:0001932	regulation of protein phosphorylation	5.78e-05	0.0105	2.36	11038	928	121	24	[Fcgr2b - fc receptor, igg, low affinity iib, Ccl24 - chemokine (c-c motif) ligand 24, Ighm - immunoglobulin heavy constant mu, Ccl4 - chemokine (c-c motif) ligand 4, Mmp9 - matrix metallopeptidase 9, Ccl7 - chemokine (c-c motif) ligand 7, Ccl8 - chemokine (c-c motif) ligand 8, Gstp1 - glutathione s-transferase, pi 1, Hbegf - heparin-binding egf-like growth factor, Gfra2 - glial cell line derived…
GO:0032897	negative regulation of viral transcription	5.81e-05	0.0105	18.24	11038	20	121	4	[Jun - jun oncogene, Zfp36 - zinc finger protein 36, Ccl4 - chemokine (c-c motif) ligand 4, Ifitm3 - interferon induced transmembrane protein 3]
GO:0009967	positive regulation of signal transduction	6.11e-05	0.0109	2.3	11038	993	121	25	[Fcgr2b - fc receptor, igg, low affinity iib, Ccl24 - chemokine (c-c motif) ligand 24, Ighm - immunoglobulin heavy constant mu, Ccl4 - chemokine (c-c motif) ligand 4, Ccl7 - chemokine (c-c motif) ligand 7, Ccl8 - chemokine (c-c motif) ligand 8, Tlr5 - toll-like receptor 5, Cxcl12 - chemokine (c-x-c motif) ligand 12, Chp2 - calcineurin-like ef hand protein 2, Marco - macrophage receptor with colla…
GO:0031401	positive regulation of protein modification process	6.49e-05	0.0114	2.47	11038	814	121	22	[Fcgr2b - fc receptor, igg, low affinity iib, Ccl24 - chemokine (c-c motif) ligand 24, Ighm - immunoglobulin heavy constant mu, Ccl4 - chemokine (c-c motif) ligand 4, Mmp9 - matrix metallopeptidase 9, Ccl7 - chemokine (c-c motif) ligand 7, Ccl8 - chemokine (c-c motif) ligand 8, Hbegf - heparin-binding egf-like growth factor, Gfra2 - glial cell line derived neurotrophic factor family receptor alph…
GO:0008360	regulation of cell shape	7.06e-05	0.0122	5.79	11038	126	121	8	[Ccl24 - chemokine (c-c motif) ligand 24, Arhgap18 - rho gtpase activating protein 18, Rnd3 - rho family gtpase 3, Lpar1 - lysophosphatidic acid receptor 1, Sema4a - sema domain, immunoglobulin domain (ig), transmembrane domain (tm) and short cytoplasmic domain, (semaphorin) 4a, Ccl12 - chemokine (c-c motif) ligand 12, Gas7 - growth arrest specific 7, Ccl2 - chemokine (c-c motif) ligand 2]
GO:0043367	CD4-positive, alpha-beta T cell differentiation	7.12e-05	0.0122	17.38	11038	21	121	4	[Gadd45g - growth arrest and dna-damage-inducible 45 gamma, Sema4a - sema domain, immunoglobulin domain (ig), transmembrane domain (tm) and short cytoplasmic domain, (semaphorin) 4a, Rsad2 - radical s-adenosyl methionine domain containing 2, Pla2g2d - phospholipase a2, group iid]
GO:0042110	T cell activation	7.37e-05	0.0124	5.04	11038	163	121	9	[Cebpb - ccaat/enhancer binding protein (c/ebp), beta, Gadd45g - growth arrest and dna-damage-inducible 45 gamma, Cd1d1 - cd1d1 antigen, Rsad2 - radical s-adenosyl methionine domain containing 2, Sema4a - sema domain, immunoglobulin domain (ig), transmembrane domain (tm) and short cytoplasmic domain, (semaphorin) 4a, Pla2g2d - phospholipase a2, group iid, Egr1 - early growth response 1, Cxcl12 - …
GO:0006956	complement activation	8.63e-05	0.0144	16.59	11038	22	121	4	[Ighm - immunoglobulin heavy constant mu, Ighd - immunoglobulin heavy constant delta, Cfp - complement factor properdin, Cfd - complement factor d (adipsin)]
GO:0030217	T cell differentiation	9.08e-05	0.015	6.58	11038	97	121	7	[Gadd45g - growth arrest and dna-damage-inducible 45 gamma, Cd1d1 - cd1d1 antigen, Rsad2 - radical s-adenosyl methionine domain containing 2, Sema4a - sema domain, immunoglobulin domain (ig), transmembrane domain (tm) and short cytoplasmic domain, (semaphorin) 4a, Pla2g2d - phospholipase a2, group iid, Egr1 - early growth response 1, Zfp36l1 - zinc finger protein 36, c3h type-like 1]
GO:0002687	positive regulation of leukocyte migration	9.69e-05	0.0158	6.52	11038	98	121	7	[Ccl24 - chemokine (c-c motif) ligand 24, Mmp9 - matrix metallopeptidase 9, Ccl4 - chemokine (c-c motif) ligand 4, Ccl12 - chemokine (c-c motif) ligand 12, Plvap - plasmalemma vesicle associated protein, Ccl2 - chemokine (c-c motif) ligand 2, Cxcl12 - chemokine (c-x-c motif) ligand 12]
GO:0050865	regulation of cell activation	0.000116	0.0186	3.2	11038	399	121	14	[Fcgr2b - fc receptor, igg, low affinity iib, Cd38 - cd38 antigen, Ighm - immunoglobulin heavy constant mu, Cd209e - cd209e antigen, C1qtnf1 - c1q and tumor necrosis factor related protein 1, Pla2g2d - phospholipase a2, group iid, Cebpb - ccaat/enhancer binding protein (c/ebp), beta, Tspan32 - tetraspanin 32, Cd1d1 - cd1d1 antigen, Bank1 - b cell scaffold protein with ankyrin repeats 1, Ighd - im…
GO:0031086	nuclear-transcribed mRNA catabolic process, deadenylation-independent decay	0.000119	0.019	91.22	11038	2	121	2	[Zfp36 - zinc finger protein 36, Zfp36l1 - zinc finger protein 36, c3h type-like 1]
GO:0035456	response to interferon-beta	0.000125	0.0197	10.14	11038	45	121	5	[Ifit3 - interferon-induced protein with tetratricopeptide repeats 3, Gbp3 - guanylate binding protein 3, Ifitm3 - interferon induced transmembrane protein 3, Ifi47 - interferon gamma inducible protein 47, Ifit1 - interferon-induced protein with tetratricopeptide repeats 1]
GO:0071241	cellular response to inorganic substance	0.000168	0.0262	5.97	11038	107	121	7	[Mt2 - metallothionein 2, Jun - jun oncogene, Mmp9 - matrix metallopeptidase 9, Trf - transferrin, Chp2 - calcineurin-like ef hand protein 2, Fos - fbj osteosarcoma oncogene, Mt1 - metallothionein 1]
GO:0002694	regulation of leukocyte activation	0.000198	0.0304	3.21	11038	369	121	13	[Fcgr2b - fc receptor, igg, low affinity iib, Cd38 - cd38 antigen, Ighm - immunoglobulin heavy constant mu, Cd209e - cd209e antigen, Pla2g2d - phospholipase a2, group iid, Cebpb - ccaat/enhancer binding protein (c/ebp), beta, Tspan32 - tetraspanin 32, Cd1d1 - cd1d1 antigen, Ighd - immunoglobulin heavy constant delta, Bank1 - b cell scaffold protein with ankyrin repeats 1, Tslp - thymic stromal ly…
GO:0072376	protein activation cascade	0.000198	0.0302	13.51	11038	27	121	4	[Ighm - immunoglobulin heavy constant mu, Ighd - immunoglobulin heavy constant delta, Cfd - complement factor d (adipsin), Cfp - complement factor properdin]
GO:0007186	G protein-coupled receptor signaling pathway	0.000228	0.0344	3.93	11038	232	121	10	[Ccl24 - chemokine (c-c motif) ligand 24, Gprc5c - g protein-coupled receptor, family c, group 5, member c, Ccl4 - chemokine (c-c motif) ligand 4, Ccl7 - chemokine (c-c motif) ligand 7, Ccl8 - chemokine (c-c motif) ligand 8, Lpar1 - lysophosphatidic acid receptor 1, Pf4 - platelet factor 4, Ccl12 - chemokine (c-c motif) ligand 12, Marco - macrophage receptor with collagenous structure, Ccl2 - che…
GO:0071310	cellular response to organic substance	0.00023	0.0343	2.26	11038	888	121	22	[Fcgr2b - fc receptor, igg, low affinity iib, Ifit3 - interferon-induced protein with tetratricopeptide repeats 3, Ccl24 - chemokine (c-c motif) ligand 24, Zfp36 - zinc finger protein 36, Ccl4 - chemokine (c-c motif) ligand 4, Ccl7 - chemokine (c-c motif) ligand 7, Gbp3 - guanylate binding protein 3, Ccl8 - chemokine (c-c motif) ligand 8, Gstp1 - glutathione s-transferase, pi 1, Pcolce - procolla…
GO:0006910	phagocytosis, recognition	0.000263	0.0388	22.81	11038	12	121	3	[Ighm - immunoglobulin heavy constant mu, Cd209b - cd209b antigen, Ighd - immunoglobulin heavy constant delta]
GO:0051239	regulation of multicellular organismal process	0.000279	0.0407	1.75	11038	1930	121	37	[Fcgr2b - fc receptor, igg, low affinity iib, Ccl24 - chemokine (c-c motif) ligand 24, Zfp36 - zinc finger protein 36, Ccl4 - chemokine (c-c motif) ligand 4, Isg15 - isg15 ubiquitin-like modifier, Cd209d - cd209d antigen, Gstp1 - glutathione s-transferase, pi 1, Tlr5 - toll-like receptor 5, Lum - lumican, Cxcl12 - chemokine (c-x-c motif) ligand 12, Cd1d1 - cd1d1 antigen, Zfp36l1 - zinc finger pro…
GO:1902531	regulation of intracellular signal transduction	0.000293	0.0422	2.04	11038	1162	121	26	[Fcgr2b - fc receptor, igg, low affinity iib, Ccl24 - chemokine (c-c motif) ligand 24, Ighm - immunoglobulin heavy constant mu, Ccl4 - chemokine (c-c motif) ligand 4, Ccl7 - chemokine (c-c motif) ligand 7, Ccl8 - chemokine (c-c motif) ligand 8, Gstp1 - glutathione s-transferase, pi 1, Gfra2 - glial cell line derived neurotrophic factor family receptor alpha 2, Cxcl12 - chemokine (c-x-c motif) lig…
GO:0042325	regulation of phosphorylation	0.000297	0.0424	2.12	11038	1032	121	24	[Fcgr2b - fc receptor, igg, low affinity iib, Ccl24 - chemokine (c-c motif) ligand 24, Ighm - immunoglobulin heavy constant mu, Ccl4 - chemokine (c-c motif) ligand 4, Mmp9 - matrix metallopeptidase 9, Ccl7 - chemokine (c-c motif) ligand 7, Ccl8 - chemokine (c-c motif) ligand 8, Gstp1 - glutathione s-transferase, pi 1, Hbegf - heparin-binding egf-like growth factor, Gfra2 - glial cell line derived…
GO:0010033	response to organic substance	0.000323	0.0456	1.96	11038	1304	121	28	[Fcgr2b - fc receptor, igg, low affinity iib, Ccl24 - chemokine (c-c motif) ligand 24, Zfp36 - zinc finger protein 36, Ccl4 - chemokine (c-c motif) ligand 4, Isg15 - isg15 ubiquitin-like modifier, Ccl7 - chemokine (c-c motif) ligand 7, Gbp3 - guanylate binding protein 3, Ccl8 - chemokine (c-c motif) ligand 8, Gstp1 - glutathione s-transferase, pi 1, Foxred2 - fad-dependent oxidoreductase domain c…
GO:0050670	regulation of lymphocyte proliferation	0.000338	0.0473	4.62	11038	158	121	8	[Fcgr2b - fc receptor, igg, low affinity iib, Cebpb - ccaat/enhancer binding protein (c/ebp), beta, Cd38 - cd38 antigen, Ighm - immunoglobulin heavy constant mu, Cd1d1 - cd1d1 antigen, Cd209e - cd209e antigen, Ighd - immunoglobulin heavy constant delta, Pla2g2d - phospholipase a2, group iid]
GO:1905517	macrophage migration	0.000339	0.047	21.05	11038	13	121	3	[Mcoln2 - mucolipin 2, Ccl12 - chemokine (c-c motif) ligand 12, Ccl2 - chemokine (c-c motif) ligand 2]
GO:0071219	cellular response to molecule of bacterial origin	0.000342	0.0469	5.32	11038	120	121	7	[Fcgr2b - fc receptor, igg, low affinity iib, Cebpb - ccaat/enhancer binding protein (c/ebp), beta, Zfp36 - zinc finger protein 36, Ppbp - pro-platelet basic protein, Gstp1 - glutathione s-transferase, pi 1, Pf4 - platelet factor 4, Ccl2 - chemokine (c-c motif) ligand 2]
GO:0035914	skeletal muscle cell differentiation	0.000344	0.0467	11.77	11038	31	121	4	[Fos - fbj osteosarcoma oncogene, Btg2 - b cell translocation gene 2, anti-proliferative, Egr1 - early growth response 1, Egr2 - early growth response 2]
GO:0045063	T-helper 1 cell differentiation	0.000355	0.0477	60.82	11038	3	121	2	[Gadd45g - growth arrest and dna-damage-inducible 45 gamma, Sema4a - sema domain, immunoglobulin domain (ig), transmembrane domain (tm) and short cytoplasmic domain, (semaphorin) 4a]
GO:2000501	regulation of natural killer cell chemotaxis	0.000355	0.0473	60.82	11038	3	121	2	[Ccl4 - chemokine (c-c motif) ligand 4, Ccl12 - chemokine (c-c motif) ligand 12]
GO:1904582	positive regulation of intracellular mRNA localization	0.000355	0.0468	60.82	11038	3	121	2	[Zfp36 - zinc finger protein 36, Zfp36l1 - zinc finger protein 36, c3h type-like 1]
GO:0032944	regulation of mononuclear cell proliferation	0.000368	0.0481	4.56	11038	160	121	8	[Fcgr2b - fc receptor, igg, low affinity iib, Cebpb - ccaat/enhancer binding protein (c/ebp), beta, Cd38 - cd38 antigen, Ighm - immunoglobulin heavy constant mu, Cd1d1 - cd1d1 antigen, Cd209e - cd209e antigen, Ighd - immunoglobulin heavy constant delta, Pla2g2d - phospholipase a2, group iid]
GO:1901701	cellular response to oxygen-containing compound	0.00037	0.0479	2.73	11038	501	121	15	[Fcgr2b - fc receptor, igg, low affinity iib, Zfp36 - zinc finger protein 36, Mmp9 - matrix metallopeptidase 9, Ccl7 - chemokine (c-c motif) ligand 7, Fos - fbj osteosarcoma oncogene, Gstp1 - glutathione s-transferase, pi 1, Pf4 - platelet factor 4, Egr1 - early growth response 1, Cebpb - ccaat/enhancer binding protein (c/ebp), beta, Jun - jun oncogene, Ppbp - pro-platelet basic protein, Lpar1 - …
GO:2000147	positive regulation of cell motility	0.000373	0.0478	3.01	11038	394	121	13	[Ccl24 - chemokine (c-c motif) ligand 24, Mmp9 - matrix metallopeptidase 9, Ccl4 - chemokine (c-c motif) ligand 4, Hbegf - heparin-binding egf-like growth factor, Sema4a - sema domain, immunoglobulin domain (ig), transmembrane domain (tm) and short cytoplasmic domain, (semaphorin) 4a, Plvap - plasmalemma vesicle associated protein, Egr1 - early growth response 1, Cxcl12 - chemokine (c-x-c motif) …
GO:0035821	modification of morphology or physiology of other organism	0.000399	0.0507	6.22	11038	88	121	6	[Jun - jun oncogene, Ccl4 - chemokine (c-c motif) ligand 4, Mmp9 - matrix metallopeptidase 9, Pf4 - platelet factor 4, Ccl2 - chemokine (c-c motif) ligand 2, Cxcl12 - chemokine (c-x-c motif) ligand 12]
GO:0006911	phagocytosis, engulfment	0.00044	0.0554	11.06	11038	33	121	4	[Fcgr2b - fc receptor, igg, low affinity iib, Ighm - immunoglobulin heavy constant mu, Ighd - immunoglobulin heavy constant delta, Marco - macrophage receptor with collagenous structure]
GO:0050792	regulation of viral process	0.000471	0.0588	4.4	11038	166	121	8	[Jun - jun oncogene, Zfp36 - zinc finger protein 36, Isg15 - isg15 ubiquitin-like modifier, Ccl4 - chemokine (c-c motif) ligand 4, Cd209e - cd209e antigen, Oasl1 - 2'-5' oligoadenylate synthetase-like 1, Rsad2 - radical s-adenosyl methionine domain containing 2, Ifitm3 - interferon induced transmembrane protein 3]
GO:0051272	positive regulation of cellular component movement	0.000485	0.0599	2.93	11038	405	121	13	[Ccl24 - chemokine (c-c motif) ligand 24, Mmp9 - matrix metallopeptidase 9, Ccl4 - chemokine (c-c motif) ligand 4, Hbegf - heparin-binding egf-like growth factor, Sema4a - sema domain, immunoglobulin domain (ig), transmembrane domain (tm) and short cytoplasmic domain, (semaphorin) 4a, Plvap - plasmalemma vesicle associated protein, Egr1 - early growth response 1, Cxcl12 - chemokine (c-x-c motif) …
GO:0043901	negative regulation of multi-organism process	0.000505	0.062	4.99	11038	128	121	7	[Jun - jun oncogene, Zfp36 - zinc finger protein 36, Isg15 - isg15 ubiquitin-like modifier, Ccl4 - chemokine (c-c motif) ligand 4, Oasl1 - 2'-5' oligoadenylate synthetase-like 1, Rsad2 - radical s-adenosyl methionine domain containing 2, Ifitm3 - interferon induced transmembrane protein 3]
GO:0051249	regulation of lymphocyte activation	0.000513	0.0623	3.29	11038	305	121	11	[Fcgr2b - fc receptor, igg, low affinity iib, Cebpb - ccaat/enhancer binding protein (c/ebp), beta, Cd38 - cd38 antigen, Ighm - immunoglobulin heavy constant mu, Cd1d1 - cd1d1 antigen, Cd209e - cd209e antigen, Ighd - immunoglobulin heavy constant delta, Bank1 - b cell scaffold protein with ankyrin repeats 1, Pla2g2d - phospholipase a2, group iid, Ccl2 - chemokine (c-c motif) ligand 2, Zfp36l1 - z…
GO:0070664	negative regulation of leukocyte proliferation	0.000531	0.0639	7.48	11038	61	121	5	[Fcgr2b - fc receptor, igg, low affinity iib, Cebpb - ccaat/enhancer binding protein (c/ebp), beta, Gstp1 - glutathione s-transferase, pi 1, Ccl12 - chemokine (c-c motif) ligand 12, Pla2g2d - phospholipase a2, group iid]
GO:0019220	regulation of phosphate metabolic process	0.000552	0.0659	2	11038	1143	121	25	[Fcgr2b - fc receptor, igg, low affinity iib, Ccl24 - chemokine (c-c motif) ligand 24, Ighm - immunoglobulin heavy constant mu, Ccl4 - chemokine (c-c motif) ligand 4, Ccl7 - chemokine (c-c motif) ligand 7, Ccl8 - chemokine (c-c motif) ligand 8, Gstp1 - glutathione s-transferase, pi 1, Gfra2 - glial cell line derived neurotrophic factor family receptor alpha 2, Cxcl12 - chemokine (c-x-c motif) lig…
GO:0035458	cellular response to interferon-beta	0.000553	0.0655	10.43	11038	35	121	4	[Ifit3 - interferon-induced protein with tetratricopeptide repeats 3, Gbp3 - guanylate binding protein 3, Ifi47 - interferon gamma inducible protein 47, Ifit1 - interferon-induced protein with tetratricopeptide repeats 1]
GO:0051174	regulation of phosphorus metabolic process	0.000559	0.0656	1.99	11038	1144	121	25	[Fcgr2b - fc receptor, igg, low affinity iib, Ccl24 - chemokine (c-c motif) ligand 24, Ighm - immunoglobulin heavy constant mu, Ccl4 - chemokine (c-c motif) ligand 4, Ccl7 - chemokine (c-c motif) ligand 7, Ccl8 - chemokine (c-c motif) ligand 8, Gstp1 - glutathione s-transferase, pi 1, Gfra2 - glial cell line derived neurotrophic factor family receptor alpha 2, Cxcl12 - chemokine (c-x-c motif) lig…
GO:0040017	positive regulation of locomotion	0.000596	0.0694	2.86	11038	414	121	13	[Ccl24 - chemokine (c-c motif) ligand 24, Mmp9 - matrix metallopeptidase 9, Ccl4 - chemokine (c-c motif) ligand 4, Hbegf - heparin-binding egf-like growth factor, Sema4a - sema domain, immunoglobulin domain (ig), transmembrane domain (tm) and short cytoplasmic domain, (semaphorin) 4a, Plvap - plasmalemma vesicle associated protein, Egr1 - early growth response 1, Cxcl12 - chemokine (c-x-c motif) …
GO:0002250	adaptive immune response	0.000608	0.0702	4.84	11038	132	121	7	[Fcgr2b - fc receptor, igg, low affinity iib, Ighm - immunoglobulin heavy constant mu, Tnfrsf17 - tumor necrosis factor receptor superfamily, member 17, Clec4n - c-type lectin domain family 4, member n, Ighd - immunoglobulin heavy constant delta, Mcoln2 - mucolipin 2, Sema4a - sema domain, immunoglobulin domain (ig), transmembrane domain (tm) and short cytoplasmic domain, (semaphorin) 4a]
GO:0032101	regulation of response to external stimulus	0.000666	0.0762	2.58	11038	530	121	15	[Fcgr2b - fc receptor, igg, low affinity iib, Ccl24 - chemokine (c-c motif) ligand 24, Zfp36 - zinc finger protein 36, Ccl4 - chemokine (c-c motif) ligand 4, Gstp1 - glutathione s-transferase, pi 1, Sema4a - sema domain, immunoglobulin domain (ig), transmembrane domain (tm) and short cytoplasmic domain, (semaphorin) 4a, C1qtnf1 - c1q and tumor necrosis factor related protein 1, Pla2g2d - phosphol…
GO:0046649	lymphocyte activation	0.000673	0.0764	3.43	11038	266	121	10	[Cebpb - ccaat/enhancer binding protein (c/ebp), beta, Gadd45g - growth arrest and dna-damage-inducible 45 gamma, Cd1d1 - cd1d1 antigen, Bank1 - b cell scaffold protein with ankyrin repeats 1, Rsad2 - radical s-adenosyl methionine domain containing 2, Sema4a - sema domain, immunoglobulin domain (ig), transmembrane domain (tm) and short cytoplasmic domain, (semaphorin) 4a, Pla2g2d - phospholipase …
GO:0048583	regulation of response to stimulus	0.00068	0.0765	1.58	11038	2478	121	43	[Fcgr2b - fc receptor, igg, low affinity iib, Ccl24 - chemokine (c-c motif) ligand 24, Zfp36 - zinc finger protein 36, Ighm - immunoglobulin heavy constant mu, Ccl4 - chemokine (c-c motif) ligand 4, Ccl7 - chemokine (c-c motif) ligand 7, Ccl8 - chemokine (c-c motif) ligand 8, Gfra2 - glial cell line derived neurotrophic factor family receptor alpha 2, Gstp1 - glutathione s-transferase, pi 1, Tlr5…
GO:1904580	regulation of intracellular mRNA localization	0.000705	0.0787	45.61	11038	4	121	2	[Zfp36 - zinc finger protein 36, Zfp36l1 - zinc finger protein 36, c3h type-like 1]
GO:0010273	detoxification of copper ion	0.000705	0.0781	45.61	11038	4	121	2	[Mt2 - metallothionein 2, Mt1 - metallothionein 1]
GO:0043903	regulation of symbiosis, encompassing mutualism through parasitism	0.00072	0.0791	4.12	11038	177	121	8	[Jun - jun oncogene, Zfp36 - zinc finger protein 36, Isg15 - isg15 ubiquitin-like modifier, Ccl4 - chemokine (c-c motif) ligand 4, Cd209e - cd209e antigen, Oasl1 - 2'-5' oligoadenylate synthetase-like 1, Rsad2 - radical s-adenosyl methionine domain containing 2, Ifitm3 - interferon induced transmembrane protein 3]
GO:0002521	leukocyte differentiation	0.000736	0.0803	3.7	11038	222	121	9	[Jun - jun oncogene, Gadd45g - growth arrest and dna-damage-inducible 45 gamma, Trf - transferrin, Cd1d1 - cd1d1 antigen, Rsad2 - radical s-adenosyl methionine domain containing 2, Sema4a - sema domain, immunoglobulin domain (ig), transmembrane domain (tm) and short cytoplasmic domain, (semaphorin) 4a, Pla2g2d - phospholipase a2, group iid, Egr1 - early growth response 1, Zfp36l1 - zinc finger pr…
GO:0031399	regulation of protein modification process	0.000748	0.081	1.92	11038	1235	121	26	[Fcgr2b - fc receptor, igg, low affinity iib, Ccl24 - chemokine (c-c motif) ligand 24, Ighm - immunoglobulin heavy constant mu, Ccl4 - chemokine (c-c motif) ligand 4, Isg15 - isg15 ubiquitin-like modifier, Ccl7 - chemokine (c-c motif) ligand 7, Ccl8 - chemokine (c-c motif) ligand 8, Gstp1 - glutathione s-transferase, pi 1, Gfra2 - glial cell line derived neurotrophic factor family receptor alpha …
GO:0001775	cell activation	0.000753	0.0808	2.95	11038	371	121	12	[Cebpb - ccaat/enhancer binding protein (c/ebp), beta, Jun - jun oncogene, Gadd45g - growth arrest and dna-damage-inducible 45 gamma, Cd1d1 - cd1d1 antigen, Bank1 - b cell scaffold protein with ankyrin repeats 1, Rsad2 - radical s-adenosyl methionine domain containing 2, Sema4a - sema domain, immunoglobulin domain (ig), transmembrane domain (tm) and short cytoplasmic domain, (semaphorin) 4a, Pf4 …
GO:0046782	regulation of viral transcription	0.00076	0.081	9.6	11038	38	121	4	[Jun - jun oncogene, Zfp36 - zinc finger protein 36, Ccl4 - chemokine (c-c motif) ligand 4, Ifitm3 - interferon induced transmembrane protein 3]
GO:1900153	positive regulation of nuclear-transcribed mRNA catabolic process, deadenylation-dependent decay	0.000781	0.0826	16.1	11038	17	121	3	[Zfp36 - zinc finger protein 36, Btg2 - b cell translocation gene 2, anti-proliferative, Zfp36l1 - zinc finger protein 36, c3h type-like 1]
GO:0008284	positive regulation of cell proliferation	0.000846	0.0887	2.43	11038	601	121	16	[Ccl24 - chemokine (c-c motif) ligand 24, Cd38 - cd38 antigen, Ighm - immunoglobulin heavy constant mu, Mmp9 - matrix metallopeptidase 9, Cd209e - cd209e antigen, Hbegf - heparin-binding egf-like growth factor, Egr1 - early growth response 1, Cxcl12 - chemokine (c-x-c motif) ligand 12, Lifr - leukemia inhibitory factor receptor, Jun - jun oncogene, Trf - transferrin, Cd1d1 - cd1d1 antigen, Chp2 -…
GO:0050864	regulation of B cell activation	0.000922	0.096	5.31	11038	103	121	6	[Fcgr2b - fc receptor, igg, low affinity iib, Cd38 - cd38 antigen, Ighm - immunoglobulin heavy constant mu, Ighd - immunoglobulin heavy constant delta, Bank1 - b cell scaffold protein with ankyrin repeats 1, Zfp36l1 - zinc finger protein 36, c3h type-like 1]
GO:0002685	regulation of leukocyte migration	0.000977	0.101	4.47	11038	143	121	7	[Ccl24 - chemokine (c-c motif) ligand 24, Mmp9 - matrix metallopeptidase 9, Ccl4 - chemokine (c-c motif) ligand 4, Ccl12 - chemokine (c-c motif) ligand 12, Plvap - plasmalemma vesicle associated protein, Ccl2 - chemokine (c-c motif) ligand 2, Cxcl12 - chemokine (c-x-c motif) ligand 12]
GO:0071216	cellular response to biotic stimulus	0.000977	0.1	4.47	11038	143	121	7	[Fcgr2b - fc receptor, igg, low affinity iib, Cebpb - ccaat/enhancer binding protein (c/ebp), beta, Zfp36 - zinc finger protein 36, Ppbp - pro-platelet basic protein, Gstp1 - glutathione s-transferase, pi 1, Pf4 - platelet factor 4, Ccl2 - chemokine (c-c motif) ligand 2]

## Sheet: 3 Gorilla v expressed
GO Term	Description	P-value	FDR q-value	Enrichment	N	B	n	b	Genes
GO:0051239	regulation of multicellular organismal process	5.45e-14	7.55e-10	1.84	11038	1930	423	136	[Vsig4 - v-set and immunoglobulin domain containing 4, Hgf - hepatocyte growth factor, Itga6 - integrin alpha 6, Amotl1 - angiomotin-like 1, Itgav - integrin alpha v, Ppm1f - protein phosphatase 1f (pp2c domain containing), Sgk1 - serum/glucocorticoid regulated kinase 1, Hpgds - hematopoietic prostaglandin d synthase, Ctla2a - cytotoxic t lymphocyte-associated protein 2 alpha, Plxna4 - plexin a4,…
GO:0007155	cell adhesion	3.7e-13	2.56e-09	3.34	11038	359	423	46	[Itga6 - integrin alpha 6, Kifc3 - kinesin family member c3, Itgav - integrin alpha v, Adam9 - a disintegrin and metallopeptidase domain 9 (meltrin gamma), Gas6 - growth arrest specific 6, Spp1 - secreted phosphoprotein 1, Itgb5 - integrin beta 5, B4galt1 - udp-gal:betaglcnac beta 1,4- galactosyltransferase, polypeptide 1, Lyve1 - lymphatic vessel endothelial hyaluronan receptor 1, Lamb2 - lamini…
GO:0022610	biological adhesion	6.77e-13	3.13e-09	3.29	11038	365	423	46	[Itga6 - integrin alpha 6, Kifc3 - kinesin family member c3, Itgav - integrin alpha v, Adam9 - a disintegrin and metallopeptidase domain 9 (meltrin gamma), Gas6 - growth arrest specific 6, Spp1 - secreted phosphoprotein 1, Itgb5 - integrin beta 5, B4galt1 - udp-gal:betaglcnac beta 1,4- galactosyltransferase, polypeptide 1, Lyve1 - lymphatic vessel endothelial hyaluronan receptor 1, Lamb2 - lamini…
GO:0040011	locomotion	2.2e-12	7.63e-09	2.66	11038	589	423	60	[Hgf - hepatocyte growth factor, Itga6 - integrin alpha 6, Ch25h - cholesterol 25-hydroxylase, Itgav - integrin alpha v, Plxna4 - plexin a4, Tns1 - tensin 1, Spp1 - secreted phosphoprotein 1, Itgb5 - integrin beta 5, S1pr1 - sphingosine-1-phosphate receptor 1, B4galt1 - udp-gal:betaglcnac beta 1,4- galactosyltransferase, polypeptide 1, Kank2 - kn motif and ankyrin repeat domains 2, Lamb2 - lamini…
GO:2000026	regulation of multicellular organismal development	1.6e-11	4.43e-08	1.96	11038	1302	423	98	[Hgf - hepatocyte growth factor, Itga6 - integrin alpha 6, Sgk1 - serum/glucocorticoid regulated kinase 1, Plxna4 - plexin a4, Ctla2a - cytotoxic t lymphocyte-associated protein 2 alpha, Nr1d1 - nuclear receptor subfamily 1, group d, member 1, Pik3r2 - phosphatidylinositol 3-kinase, regulatory subunit, polypeptide 2 (p85 beta), Gpr137b - g protein-coupled receptor 137b, Cx3cr1 - chemokine (c-x3-c…
GO:0007165	signal transduction	4.25e-11	9.8e-08	1.72	11038	1956	423	129	[Hgf - hepatocyte growth factor, Itga6 - integrin alpha 6, Amotl1 - angiomotin-like 1, Itgav - integrin alpha v, Ppm1f - protein phosphatase 1f (pp2c domain containing), Sgk1 - serum/glucocorticoid regulated kinase 1, Plxna4 - plexin a4, Itgb5 - integrin beta 5, Nr1d1 - nuclear receptor subfamily 1, group d, member 1, Calcrl - calcitonin receptor-like, Arhgap23 - rho gtpase activating protein 23,…
GO:0050793	regulation of developmental process	2.23e-10	4.41e-07	1.77	11038	1667	423	113	[Hgf - hepatocyte growth factor, Itga6 - integrin alpha 6, Itgav - integrin alpha v, Sgk1 - serum/glucocorticoid regulated kinase 1, Ctla2a - cytotoxic t lymphocyte-associated protein 2 alpha, Plxna4 - plexin a4, Pdlim7 - pdz and lim domain 7, Nr1d1 - nuclear receptor subfamily 1, group d, member 1, Pik3r2 - phosphatidylinositol 3-kinase, regulatory subunit, polypeptide 2 (p85 beta), Spire1 - spi…
GO:0051241	negative regulation of multicellular organismal process	6.69e-10	1.16e-06	2.19	11038	800	423	67	[Hgf - hepatocyte growth factor, Vsig4 - v-set and immunoglobulin domain containing 4, S100b - s100 protein, beta polypeptide, neural, Cd276 - cd276 antigen, Ecm1 - extracellular matrix protein 1, Hpgds - hematopoietic prostaglandin d synthase, Nr1d1 - nuclear receptor subfamily 1, group d, member 1, Calcrl - calcitonin receptor-like, Pik3r2 - phosphatidylinositol 3-kinase, regulatory subunit, po…
GO:0030155	regulation of cell adhesion	7.17e-10	1.1e-06	2.62	11038	478	423	48	[Vsig4 - v-set and immunoglobulin domain containing 4, Itga6 - integrin alpha 6, Cd276 - cd276 antigen, Pde3b - phosphodiesterase 3b, cgmp-inhibited, Itgav - integrin alpha v, Ppm1f - protein phosphatase 1f (pp2c domain containing), Cyth3 - cytohesin 3, Bmp2 - bone morphogenetic protein 2, Adam9 - a disintegrin and metallopeptidase domain 9 (meltrin gamma), Pdgfb - platelet derived growth factor,…
GO:0016477	cell migration	8.8e-10	1.22e-06	2.57	11038	497	423	49	[Hgf - hepatocyte growth factor, Itga6 - integrin alpha 6, Ch25h - cholesterol 25-hydroxylase, Itgav - integrin alpha v, Tns1 - tensin 1, Spp1 - secreted phosphoprotein 1, Itgb5 - integrin beta 5, S1pr1 - sphingosine-1-phosphate receptor 1, B4galt1 - udp-gal:betaglcnac beta 1,4- galactosyltransferase, polypeptide 1, Kank2 - kn motif and ankyrin repeat domains 2, Lamb2 - laminin, beta 2, Fmnl3 - f…
GO:0032101	regulation of response to external stimulus	9.06e-10	1.14e-06	2.51	11038	530	423	51	[Hgf - hepatocyte growth factor, Vsig4 - v-set and immunoglobulin domain containing 4, Cd276 - cd276 antigen, Ppm1f - protein phosphatase 1f (pp2c domain containing), Ctla2a - cytotoxic t lymphocyte-associated protein 2 alpha, Plxna4 - plexin a4, S1pr1 - sphingosine-1-phosphate receptor 1, Kank2 - kn motif and ankyrin repeat domains 2, Nr1d1 - nuclear receptor subfamily 1, group d, member 1, Calc…
GO:0048870	cell motility	1.53e-09	1.76e-06	2.47	11038	538	423	51	[Hgf - hepatocyte growth factor, Itga6 - integrin alpha 6, Ch25h - cholesterol 25-hydroxylase, Itgav - integrin alpha v, Tns1 - tensin 1, Spp1 - secreted phosphoprotein 1, Itgb5 - integrin beta 5, S1pr1 - sphingosine-1-phosphate receptor 1, B4galt1 - udp-gal:betaglcnac beta 1,4- galactosyltransferase, polypeptide 1, Kank2 - kn motif and ankyrin repeat domains 2, Lamb2 - laminin, beta 2, Fmnl3 - f…
GO:0048646	anatomical structure formation involved in morphogenesis	1.91e-09	2.03e-06	2.58	11038	476	423	47	[Pde3b - phosphodiesterase 3b, cgmp-inhibited, Amotl1 - angiomotin-like 1, Angptl2 - angiopoietin-like 2, Itgav - integrin alpha v, Ecm1 - extracellular matrix protein 1, Bmp2 - bone morphogenetic protein 2, Cd109 - cd109 antigen, Ski - ski sarcoma viral oncogene homolog (avian), Skil - ski-like, S1pr1 - sphingosine-1-phosphate receptor 1, B4galt1 - udp-gal:betaglcnac beta 1,4- galactosyltransfer…
GO:0006928	movement of cell or subcellular component	2.45e-09	2.42e-06	2.18	11038	753	423	63	[Hgf - hepatocyte growth factor, Itga6 - integrin alpha 6, Kifc3 - kinesin family member c3, Ch25h - cholesterol 25-hydroxylase, Itgav - integrin alpha v, Camk2d - calcium/calmodulin-dependent protein kinase ii, delta, Plxna4 - plexin a4, Tns1 - tensin 1, Spp1 - secreted phosphoprotein 1, Itgb5 - integrin beta 5, S1pr1 - sphingosine-1-phosphate receptor 1, B4galt1 - udp-gal:betaglcnac beta 1,4- g…
GO:0051270	regulation of cellular component movement	2.7e-09	2.5e-06	2.25	11038	684	423	59	[Hgf - hepatocyte growth factor, Itga6 - integrin alpha 6, Amotl1 - angiomotin-like 1, Itgav - integrin alpha v, Ppm1f - protein phosphatase 1f (pp2c domain containing), Ecm1 - extracellular matrix protein 1, Camk2d - calcium/calmodulin-dependent protein kinase ii, delta, Plxna4 - plexin a4, S1pr1 - sphingosine-1-phosphate receptor 1, B4galt1 - udp-gal:betaglcnac beta 1,4- galactosyltransferase, …
GO:0030334	regulation of cell migration	3.69e-09	3.2e-06	2.31	11038	620	423	55	[Hgf - hepatocyte growth factor, Itga6 - integrin alpha 6, Amotl1 - angiomotin-like 1, Itgav - integrin alpha v, Ppm1f - protein phosphatase 1f (pp2c domain containing), Ecm1 - extracellular matrix protein 1, Camk2d - calcium/calmodulin-dependent protein kinase ii, delta, Plxna4 - plexin a4, S1pr1 - sphingosine-1-phosphate receptor 1, Pik3r2 - phosphatidylinositol 3-kinase, regulatory subunit, po…
GO:2000145	regulation of cell motility	5.4e-09	4.4e-06	2.27	11038	644	423	56	[Hgf - hepatocyte growth factor, Itga6 - integrin alpha 6, Amotl1 - angiomotin-like 1, Itgav - integrin alpha v, Ppm1f - protein phosphatase 1f (pp2c domain containing), Ecm1 - extracellular matrix protein 1, Camk2d - calcium/calmodulin-dependent protein kinase ii, delta, Plxna4 - plexin a4, S1pr1 - sphingosine-1-phosphate receptor 1, Pik3r2 - phosphatidylinositol 3-kinase, regulatory subunit, po…
GO:0030335	positive regulation of cell migration	9.93e-09	7.64e-06	2.69	11038	388	423	40	[Hgf - hepatocyte growth factor, Itga6 - integrin alpha 6, Amotl1 - angiomotin-like 1, Itgav - integrin alpha v, Ppm1f - protein phosphatase 1f (pp2c domain containing), Mpzl1 - myelin protein zero-like 1, Bmp2 - bone morphogenetic protein 2, Camk2d - calcium/calmodulin-dependent protein kinase ii, delta, Adam9 - a disintegrin and metallopeptidase domain 9 (meltrin gamma), Pdgfb - platelet derive…
GO:2000147	positive regulation of cell motility	1.53e-08	1.12e-05	2.65	11038	394	423	40	[Hgf - hepatocyte growth factor, Itga6 - integrin alpha 6, Amotl1 - angiomotin-like 1, Itgav - integrin alpha v, Ppm1f - protein phosphatase 1f (pp2c domain containing), Mpzl1 - myelin protein zero-like 1, Bmp2 - bone morphogenetic protein 2, Camk2d - calcium/calmodulin-dependent protein kinase ii, delta, Adam9 - a disintegrin and metallopeptidase domain 9 (meltrin gamma), Pdgfb - platelet derive…
GO:0048583	regulation of response to stimulus	1.8e-08	1.25e-05	1.52	11038	2478	423	144	[Vsig4 - v-set and immunoglobulin domain containing 4, Hgf - hepatocyte growth factor, Itga6 - integrin alpha 6, Itgav - integrin alpha v, Cyth3 - cytohesin 3, Ppm1f - protein phosphatase 1f (pp2c domain containing), Ctla2a - cytotoxic t lymphocyte-associated protein 2 alpha, Plxna4 - plexin a4, Kank2 - kn motif and ankyrin repeat domains 2, Nr1d1 - nuclear receptor subfamily 1, group d, member 1…
GO:0040012	regulation of locomotion	2.22e-08	1.47e-05	2.16	11038	688	423	57	[Hgf - hepatocyte growth factor, Itga6 - integrin alpha 6, Amotl1 - angiomotin-like 1, Itgav - integrin alpha v, Trim35 - tripartite motif-containing 35, Ppm1f - protein phosphatase 1f (pp2c domain containing), Ecm1 - extracellular matrix protein 1, Camk2d - calcium/calmodulin-dependent protein kinase ii, delta, Plxna4 - plexin a4, S1pr1 - sphingosine-1-phosphate receptor 1, Pik3r2 - phosphatidyl…
GO:0051272	positive regulation of cellular component movement	3.31e-08	2.09e-05	2.58	11038	405	423	40	[Hgf - hepatocyte growth factor, Itga6 - integrin alpha 6, Amotl1 - angiomotin-like 1, Itgav - integrin alpha v, Ppm1f - protein phosphatase 1f (pp2c domain containing), Mpzl1 - myelin protein zero-like 1, Bmp2 - bone morphogenetic protein 2, Camk2d - calcium/calmodulin-dependent protein kinase ii, delta, Adam9 - a disintegrin and metallopeptidase domain 9 (meltrin gamma), Pdgfb - platelet derive…
GO:0051240	positive regulation of multicellular organismal process	5.51e-08	3.32e-05	1.81	11038	1165	423	81	[Hgf - hepatocyte growth factor, Itga6 - integrin alpha 6, S100b - s100 protein, beta polypeptide, neural, Cd276 - cd276 antigen, Amotl1 - angiomotin-like 1, Ppm1f - protein phosphatase 1f (pp2c domain containing), Ecm1 - extracellular matrix protein 1, Sgk1 - serum/glucocorticoid regulated kinase 1, Camk2d - calcium/calmodulin-dependent protein kinase ii, delta, Palm - paralemmin, Plxna4 - plexi…
GO:0040017	positive regulation of locomotion	6.08e-08	3.51e-05	2.52	11038	414	423	40	[Hgf - hepatocyte growth factor, Itga6 - integrin alpha 6, Amotl1 - angiomotin-like 1, Itgav - integrin alpha v, Ppm1f - protein phosphatase 1f (pp2c domain containing), Mpzl1 - myelin protein zero-like 1, Bmp2 - bone morphogenetic protein 2, Camk2d - calcium/calmodulin-dependent protein kinase ii, delta, Adam9 - a disintegrin and metallopeptidase domain 9 (meltrin gamma), Pdgfb - platelet derive…
GO:0043277	apoptotic cell clearance	7.81e-08	4.33e-05	12.28	11038	17	423	8	[Trem2 - triggering receptor expressed on myeloid cells 2, Lrp1 - low density lipoprotein receptor-related protein 1, Itgav - integrin alpha v, Tgm2 - transglutaminase 2, c polypeptide, Mfge8 - milk fat globule-egf factor 8 protein, Gas6 - growth arrest specific 6, Nr1h3 - nuclear receptor subfamily 1, group h, member 3, Mertk - c-mer proto-oncogene tyrosine kinase]
GO:0032879	regulation of localization	2.32e-07	0.000124	1.61	11038	1707	423	105	[Hgf - hepatocyte growth factor, Itga6 - integrin alpha 6, Amotl1 - angiomotin-like 1, Itgav - integrin alpha v, Ppm1f - protein phosphatase 1f (pp2c domain containing), Sgk1 - serum/glucocorticoid regulated kinase 1, Plxna4 - plexin a4, Spp1 - secreted phosphoprotein 1, Ctsd - cathepsin d, Nr1d1 - nuclear receptor subfamily 1, group d, member 1, Pik3r2 - phosphatidylinositol 3-kinase, regulatory…
GO:0001525	angiogenesis	2.56e-07	0.000131	3.3	11038	190	423	24	[Tgfbr1 - transforming growth factor, beta receptor i, Pde3b - phosphodiesterase 3b, cgmp-inhibited, Fn1 - fibronectin 1, Amotl1 - angiomotin-like 1, Angptl2 - angiopoietin-like 2, Itgav - integrin alpha v, Ecm1 - extracellular matrix protein 1, Hpse - heparanase, Ecscr - endothelial cell surface expressed chemotaxis and apoptosis regulator, B4galt1 - udp-gal:betaglcnac beta 1,4- galactosyltransf…
GO:0042127	regulation of cell proliferation	5.21e-07	0.000258	1.8	11038	1046	423	72	[Vsig4 - v-set and immunoglobulin domain containing 4, S100b - s100 protein, beta polypeptide, neural, Cd276 - cd276 antigen, Itgav - integrin alpha v, Trim35 - tripartite motif-containing 35, Meis3 - meis homeobox 3, Ecm1 - extracellular matrix protein 1, Camk2d - calcium/calmodulin-dependent protein kinase ii, delta, Hpgds - hematopoietic prostaglandin d synthase, S1pr1 - sphingosine-1-phosphat…
GO:1901700	response to oxygen-containing compound	6.52e-07	0.000311	1.97	11038	741	423	56	[Itgav - integrin alpha v, Sgk1 - serum/glucocorticoid regulated kinase 1, Spp1 - secreted phosphoprotein 1, Klf9 - kruppel-like factor 9, Nr1d1 - nuclear receptor subfamily 1, group d, member 1, Calcrl - calcitonin receptor-like, Pik3r2 - phosphatidylinositol 3-kinase, regulatory subunit, polypeptide 2 (p85 beta), Bcl2 - b cell leukemia/lymphoma 2, Mill2 - mhc i like leukocyte 2, Scd2 - stearoyl…
GO:0048585	negative regulation of response to stimulus	7.17e-07	0.000331	1.76	11038	1095	423	74	[Hgf - hepatocyte growth factor, Vsig4 - v-set and immunoglobulin domain containing 4, Itga6 - integrin alpha 6, Cd276 - cd276 antigen, Itgav - integrin alpha v, Meis3 - meis homeobox 3, Ecm1 - extracellular matrix protein 1, Palm - paralemmin, Ctla2a - cytotoxic t lymphocyte-associated protein 2 alpha, Kank2 - kn motif and ankyrin repeat domains 2, Nr1d1 - nuclear receptor subfamily 1, group d, …
GO:0002376	immune system process	9.63e-07	0.00043	1.8	11038	1003	423	69	[Tnfsf8 - tumor necrosis factor (ligand) superfamily, member 8, Itga6 - integrin alpha 6, Cd276 - cd276 antigen, Fcna - ficolin a, Ch25h - cholesterol 25-hydroxylase, Itgav - integrin alpha v, Trim35 - tripartite motif-containing 35, Raet1d - retinoic acid early transcript delta, 4930486L24Rik - riken cdna 4930486l24 gene, Spp1 - secreted phosphoprotein 1, S1pr1 - sphingosine-1-phosphate receptor…
GO:0051094	positive regulation of developmental process	9.68e-07	0.000419	1.84	11038	924	423	65	[Hgf - hepatocyte growth factor, Itga6 - integrin alpha 6, S100b - s100 protein, beta polypeptide, neural, Cd276 - cd276 antigen, Ecm1 - extracellular matrix protein 1, Sgk1 - serum/glucocorticoid regulated kinase 1, Palm - paralemmin, Plxna4 - plexin a4, Pdlim7 - pdz and lim domain 7, B4galt1 - udp-gal:betaglcnac beta 1,4- galactosyltransferase, polypeptide 1, Spire1 - spire homolog 1 (drosophil…
GO:0045595	regulation of cell differentiation	1.12e-06	0.000471	1.72	11038	1169	423	77	[Hgf - hepatocyte growth factor, Itga6 - integrin alpha 6, S100b - s100 protein, beta polypeptide, neural, Cd276 - cd276 antigen, Itgav - integrin alpha v, Sgk1 - serum/glucocorticoid regulated kinase 1, Palm - paralemmin, Plxna4 - plexin a4, Ctla2a - cytotoxic t lymphocyte-associated protein 2 alpha, Pdlim7 - pdz and lim domain 7, Nr1d1 - nuclear receptor subfamily 1, group d, member 1, Gpr137b …
GO:0045785	positive regulation of cell adhesion	1.16e-06	0.000472	2.64	11038	297	423	30	[Itga6 - integrin alpha 6, Cd276 - cd276 antigen, Itgav - integrin alpha v, Ppm1f - protein phosphatase 1f (pp2c domain containing), Cyth3 - cytohesin 3, Adam9 - a disintegrin and metallopeptidase domain 9 (meltrin gamma), Pdgfb - platelet derived growth factor, b polypeptide, Spp1 - secreted phosphoprotein 1, Tsc2 - tuberous sclerosis 2, Fermt2 - fermitin family homolog 2 (drosophila), Ccr5 - ch…
GO:0008285	negative regulation of cell proliferation	1.56e-06	0.000617	2.26	11038	451	423	39	[Vsig4 - v-set and immunoglobulin domain containing 4, Cd276 - cd276 antigen, Trim35 - tripartite motif-containing 35, Bmp2 - bone morphogenetic protein 2, Cd109 - cd109 antigen, Timp2 - tissue inhibitor of metalloproteinase 2, Nlrc3 - nlr family, card domain containing 3, Hpgds - hematopoietic prostaglandin d synthase, Ski - ski sarcoma viral oncogene homolog (avian), B4galt1 - udp-gal:betaglcna…
GO:0022603	regulation of anatomical structure morphogenesis	1.58e-06	0.000607	1.96	11038	705	423	53	[Hgf - hepatocyte growth factor, S100b - s100 protein, beta polypeptide, neural, Ecm1 - extracellular matrix protein 1, Sgk1 - serum/glucocorticoid regulated kinase 1, Palm - paralemmin, Plxna4 - plexin a4, B4galt1 - udp-gal:betaglcnac beta 1,4- galactosyltransferase, polypeptide 1, Pik3r2 - phosphatidylinositol 3-kinase, regulatory subunit, polypeptide 2 (p85 beta), Spire1 - spire homolog 1 (dro…
GO:0051960	regulation of nervous system development	1.66e-06	0.00062	2.04	11038	613	423	48	[Bhlhe41 - basic helix-loop-helix family, member e41, Hgf - hepatocyte growth factor, Itga6 - integrin alpha 6, S100b - s100 protein, beta polypeptide, neural, Bmp2 - bone morphogenetic protein 2, Mob2 - mob kinase activator 2, Timp2 - tissue inhibitor of metalloproteinase 2, Sgk1 - serum/glucocorticoid regulated kinase 1, Ski - ski sarcoma viral oncogene homolog (avian), Palm - paralemmin, Bag5 …
GO:0048584	positive regulation of response to stimulus	1.92e-06	0.000699	1.63	11038	1373	423	86	[Hgf - hepatocyte growth factor, S100b - s100 protein, beta polypeptide, neural, Cd276 - cd276 antigen, Fcna - ficolin a, Meis3 - meis homeobox 3, Ppm1f - protein phosphatase 1f (pp2c domain containing), Camk2d - calcium/calmodulin-dependent protein kinase ii, delta, S1pr1 - sphingosine-1-phosphate receptor 1, Rftn1 - raftlin lipid raft linker 1, Tspan14 - tetraspanin 14, Tlr13 - toll-like recept…
GO:0098657	import into cell	3.98e-06	0.00141	2.36	11038	365	423	33	[Itgav - integrin alpha v, Slc46a1 - solute carrier family 46, member 1, Gas6 - growth arrest specific 6, Anxa3 - annexin a3, Fchsd2 - fch and double sh3 domains 2, Calcrl - calcitonin receptor-like, Slc27a1 - solute carrier family 27 (fatty acid transporter), member 1, Slc12a7 - solute carrier family 12, member 7, Myo1e - myosin ie, Trem2 - triggering receptor expressed on myeloid cells 2, Tgfbr…
GO:0032502	developmental process	4.55e-06	0.00158	1.38	11038	2800	423	148	[Tnfsf8 - tumor necrosis factor (ligand) superfamily, member 8, Hgf - hepatocyte growth factor, Itga6 - integrin alpha 6, Amotl1 - angiomotin-like 1, Itgav - integrin alpha v, Sgk1 - serum/glucocorticoid regulated kinase 1, Plxna4 - plexin a4, Spp1 - secreted phosphoprotein 1, Pdlim7 - pdz and lim domain 7, Kank2 - kn motif and ankyrin repeat domains 2, Nr1d1 - nuclear receptor subfamily 1, group…
GO:0055074	calcium ion homeostasis	4.68e-06	0.00158	2.81	11038	223	423	24	[S100b - s100 protein, beta polypeptide, neural, Gna15 - guanine nucleotide binding protein, alpha 15, Trpv4 - transient receptor potential cation channel, subfamily v, member 4, Lpar6 - lysophosphatidic acid receptor 6, Itgav - integrin alpha v, Bok - bcl2-related ovarian killer protein, Tgm2 - transglutaminase 2, c polypeptide, Camk2d - calcium/calmodulin-dependent protein kinase ii, delta, Cls…
GO:0006935	chemotaxis	4.8e-06	0.00158	3.06	11038	179	423	21	[Hgf - hepatocyte growth factor, Plekhg5 - pleckstrin homology domain containing, family g (with rhogef domain) member 5, Ch25h - cholesterol 25-hydroxylase, Itgav - integrin alpha v, Gpr183 - g protein-coupled receptor 183, Pdgfb - platelet derived growth factor, b polypeptide, Plxna4 - plexin a4, Gas6 - growth arrest specific 6, Ecscr - endothelial cell surface expressed chemotaxis and apoptosi…
GO:0060284	regulation of cell development	5.28e-06	0.0017	1.94	11038	658	423	49	[Hgf - hepatocyte growth factor, Itga6 - integrin alpha 6, Sgk1 - serum/glucocorticoid regulated kinase 1, Palm - paralemmin, Plxna4 - plexin a4, Nr1d1 - nuclear receptor subfamily 1, group d, member 1, Bcl2 - b cell leukemia/lymphoma 2, Cspg4 - chondroitin sulfate proteoglycan 4, Eef2k - eukaryotic elongation factor-2 kinase, Cx3cr1 - chemokine (c-x3-c) receptor 1, Camk1 - calcium/calmodulin-dep…
GO:0042330	taxis	5.72e-06	0.0018	3.03	11038	181	423	21	[Hgf - hepatocyte growth factor, Plekhg5 - pleckstrin homology domain containing, family g (with rhogef domain) member 5, Ch25h - cholesterol 25-hydroxylase, Itgav - integrin alpha v, Gpr183 - g protein-coupled receptor 183, Pdgfb - platelet derived growth factor, b polypeptide, Plxna4 - plexin a4, Gas6 - growth arrest specific 6, Ecscr - endothelial cell surface expressed chemotaxis and apoptosi…
GO:0008347	glial cell migration	5.81e-06	0.00179	9.13	11038	20	423	7	[Fn1 - fibronectin 1, Hexb - hexosaminidase b, Pmp22 - peripheral myelin protein 22, Vcan - versican, Cspg4 - chondroitin sulfate proteoglycan 4, P2ry12 - purinergic receptor p2y, g-protein coupled 12, Cd9 - cd9 antigen]
GO:0050767	regulation of neurogenesis	6.13e-06	0.00184	2.02	11038	568	423	44	[Bhlhe41 - basic helix-loop-helix family, member e41, Hgf - hepatocyte growth factor, Itga6 - integrin alpha 6, Bmp2 - bone morphogenetic protein 2, Mob2 - mob kinase activator 2, Timp2 - tissue inhibitor of metalloproteinase 2, Sgk1 - serum/glucocorticoid regulated kinase 1, Ski - ski sarcoma viral oncogene homolog (avian), Palm - paralemmin, Bag5 - bcl2-associated athanogene 5, Skil - ski-like,…
GO:0032102	negative regulation of response to external stimulus	6.46e-06	0.0019	2.83	11038	212	423	23	[Hgf - hepatocyte growth factor, Cd276 - cd276 antigen, Cd109 - cd109 antigen, Nlrc3 - nlr family, card domain containing 3, Ets1 - e26 avian leukemia oncogene 1, 5' domain, Pdgfb - platelet derived growth factor, b polypeptide, Ctla2a - cytotoxic t lymphocyte-associated protein 2 alpha, Uaca - uveal autoantigen with coiled-coil domains and ankyrin repeats, Grn - granulin, Serpine1 - serine (or c…
GO:0031589	cell-substrate adhesion	6.55e-06	0.00189	4.1	11038	89	423	14	[Itga6 - integrin alpha 6, Fn1 - fibronectin 1, Itgav - integrin alpha v, Adam9 - a disintegrin and metallopeptidase domain 9 (meltrin gamma), Hpse - heparanase, Gas6 - growth arrest specific 6, Itgb5 - integrin beta 5, B4galt1 - udp-gal:betaglcnac beta 1,4- galactosyltransferase, polypeptide 1, Mertk - c-mer proto-oncogene tyrosine kinase, Emilin1 - elastin microfibril interfacer 1, Lamb2 - lami…
GO:0051482	positive regulation of cytosolic calcium ion concentration involved in phospholipase C-activating G protein-coupled signaling pathway	7.07e-06	0.002	11.18	11038	14	423	6	[Gna15 - guanine nucleotide binding protein, alpha 15, Tgm2 - transglutaminase 2, c polypeptide, Lpar6 - lysophosphatidic acid receptor 6, Plcd1 - phospholipase c, delta 1, A630033H20Rik - riken cdna a630033h20 gene, S1pr1 - sphingosine-1-phosphate receptor 1]
GO:0051093	negative regulation of developmental process	8e-06	0.00221	1.93	11038	649	423	48	[Bhlhe41 - basic helix-loop-helix family, member e41, S100b - s100 protein, beta polypeptide, neural, Pde3b - phosphodiesterase 3b, cgmp-inhibited, Itgav - integrin alpha v, Ecm1 - extracellular matrix protein 1, Bmp2 - bone morphogenetic protein 2, Ski - ski sarcoma viral oncogene homolog (avian), Pdgfb - platelet derived growth factor, b polypeptide, Bag5 - bcl2-associated athanogene 5, Skil - …
GO:0009966	regulation of signal transduction	8.33e-06	0.00226	1.49	11038	1862	423	106	[Hgf - hepatocyte growth factor, Itga6 - integrin alpha 6, Itgav - integrin alpha v, Cyth3 - cytohesin 3, Kank2 - kn motif and ankyrin repeat domains 2, Nr1d1 - nuclear receptor subfamily 1, group d, member 1, Pik3r2 - phosphatidylinositol 3-kinase, regulatory subunit, polypeptide 2 (p85 beta), Tspan14 - tetraspanin 14, Tlr13 - toll-like receptor 13, Sorbs3 - sorbin and sh3 domain containing 3, G…
GO:0032103	positive regulation of response to external stimulus	9.53e-06	0.00254	2.77	11038	217	423	23	[Trem2 - triggering receptor expressed on myeloid cells 2, Fn1 - fibronectin 1, Hyal2 - hyaluronoglucosaminidase 2, Trpv4 - transient receptor potential cation channel, subfamily v, member 4, Tgm2 - transglutaminase 2, c polypeptide, Ppm1f - protein phosphatase 1f (pp2c domain containing), Nupr1 - nuclear protein transcription regulator 1, Rab34 - rab34, member of ras oncogene family, Ets1 - e26 …
GO:0050789	regulation of biological process	1.01e-05	0.00263	1.17	11038	6492	423	291	[Vsig4 - v-set and immunoglobulin domain containing 4, Tnfsf8 - tumor necrosis factor (ligand) superfamily, member 8, Ppm1f - protein phosphatase 1f (pp2c domain containing), Sgk1 - serum/glucocorticoid regulated kinase 1, Hpgds - hematopoietic prostaglandin d synthase, Ctla2a - cytotoxic t lymphocyte-associated protein 2 alpha, Plxna4 - plexin a4, Ctsd - cathepsin d, Calcrl - calcitonin receptor…
GO:0006874	cellular calcium ion homeostasis	1.03e-05	0.00264	2.75	11038	218	423	23	[S100b - s100 protein, beta polypeptide, neural, Gna15 - guanine nucleotide binding protein, alpha 15, Trpv4 - transient receptor potential cation channel, subfamily v, member 4, Lpar6 - lysophosphatidic acid receptor 6, Itgav - integrin alpha v, Bok - bcl2-related ovarian killer protein, Tgm2 - transglutaminase 2, c polypeptide, Camk2d - calcium/calmodulin-dependent protein kinase ii, delta, Cls…
GO:0010033	response to organic substance	1.05e-05	0.00264	1.6	11038	1304	423	80	[Hgf - hepatocyte growth factor, Itgav - integrin alpha v, Sgk1 - serum/glucocorticoid regulated kinase 1, Spp1 - secreted phosphoprotein 1, Syngr1 - synaptogyrin 1, Rftn1 - raftlin lipid raft linker 1, Klf9 - kruppel-like factor 9, Nr1d1 - nuclear receptor subfamily 1, group d, member 1, Calcrl - calcitonin receptor-like, Pik3r2 - phosphatidylinositol 3-kinase, regulatory subunit, polypeptide 2 …
GO:0050801	ion homeostasis	1.11e-05	0.00275	2.18	11038	418	423	35	[S100b - s100 protein, beta polypeptide, neural, Hyal2 - hyaluronoglucosaminidase 2, Gna15 - guanine nucleotide binding protein, alpha 15, Itgav - integrin alpha v, Bok - bcl2-related ovarian killer protein, Sgk1 - serum/glucocorticoid regulated kinase 1, Camk2d - calcium/calmodulin-dependent protein kinase ii, delta, Spp1 - secreted phosphoprotein 1, Atp2a3 - atpase, ca++ transporting, ubiquitou…
GO:0009968	negative regulation of signal transduction	1.27e-05	0.00308	1.78	11038	836	423	57	[Hgf - hepatocyte growth factor, Itga6 - integrin alpha 6, Itgav - integrin alpha v, Meis3 - meis homeobox 3, Ecm1 - extracellular matrix protein 1, Palm - paralemmin, Kank2 - kn motif and ankyrin repeat domains 2, Nr1d1 - nuclear receptor subfamily 1, group d, member 1, Pik3r2 - phosphatidylinositol 3-kinase, regulatory subunit, polypeptide 2 (p85 beta), Bcl2 - b cell leukemia/lymphoma 2, Pmepa1…
GO:0050794	regulation of cellular process	1.32e-05	0.00316	1.18	11038	6154	423	278	[Vsig4 - v-set and immunoglobulin domain containing 4, Tnfsf8 - tumor necrosis factor (ligand) superfamily, member 8, Ppm1f - protein phosphatase 1f (pp2c domain containing), Sgk1 - serum/glucocorticoid regulated kinase 1, Hpgds - hematopoietic prostaglandin d synthase, Ctla2a - cytotoxic t lymphocyte-associated protein 2 alpha, Plxna4 - plexin a4, Ctsd - cathepsin d, Calcrl - calcitonin receptor…
GO:0045597	positive regulation of cell differentiation	1.33e-05	0.00312	1.86	11038	700	423	50	[Hgf - hepatocyte growth factor, Itga6 - integrin alpha 6, Cd276 - cd276 antigen, Sgk1 - serum/glucocorticoid regulated kinase 1, Palm - paralemmin, Plxna4 - plexin a4, Pdlim7 - pdz and lim domain 7, Bcl2 - b cell leukemia/lymphoma 2, Eef2k - eukaryotic elongation factor-2 kinase, Cx3cr1 - chemokine (c-x3-c) receptor 1, Tgfbr1 - transforming growth factor, beta receptor i, Tgfbr2 - transforming g…
GO:0055082	cellular chemical homeostasis	1.53e-05	0.00352	2.21	11038	389	423	33	[S100b - s100 protein, beta polypeptide, neural, Gna15 - guanine nucleotide binding protein, alpha 15, Itgav - integrin alpha v, Bok - bcl2-related ovarian killer protein, Sgk1 - serum/glucocorticoid regulated kinase 1, Camk2d - calcium/calmodulin-dependent protein kinase ii, delta, Gas6 - growth arrest specific 6, Spp1 - secreted phosphoprotein 1, Atp2a3 - atpase, ca++ transporting, ubiquitous, …
GO:0007160	cell-matrix adhesion	1.59e-05	0.00362	5.22	11038	50	423	10	[Itga6 - integrin alpha 6, Fn1 - fibronectin 1, Emilin1 - elastin microfibril interfacer 1, Fermt2 - fermitin family homolog 2 (drosophila), Itgav - integrin alpha v, Adam9 - a disintegrin and metallopeptidase domain 9 (meltrin gamma), Hpse - heparanase, Nid2 - nidogen 2, Itgb5 - integrin beta 5, B4galt1 - udp-gal:betaglcnac beta 1,4- galactosyltransferase, polypeptide 1]
GO:0071310	cellular response to organic substance	1.91e-05	0.00426	1.73	11038	888	423	59	[Hgf - hepatocyte growth factor, Sgk1 - serum/glucocorticoid regulated kinase 1, Spp1 - secreted phosphoprotein 1, Syngr1 - synaptogyrin 1, Klf9 - kruppel-like factor 9, Nr1d1 - nuclear receptor subfamily 1, group d, member 1, Calcrl - calcitonin receptor-like, Pik3r2 - phosphatidylinositol 3-kinase, regulatory subunit, polypeptide 2 (p85 beta), Bcl2 - b cell leukemia/lymphoma 2, Ube2g2 - ubiquit…
GO:0042221	response to chemical	1.92e-05	0.00423	1.51	11038	1586	423	92	[Hgf - hepatocyte growth factor, Itgav - integrin alpha v, Ppm1f - protein phosphatase 1f (pp2c domain containing), Sgk1 - serum/glucocorticoid regulated kinase 1, Spp1 - secreted phosphoprotein 1, Syngr1 - synaptogyrin 1, Rftn1 - raftlin lipid raft linker 1, Klf9 - kruppel-like factor 9, Nr1d1 - nuclear receptor subfamily 1, group d, member 1, Calcrl - calcitonin receptor-like, Pik3r2 - phosphat…
GO:0010646	regulation of cell communication	1.98e-05	0.00429	1.43	11038	2057	423	113	[Hgf - hepatocyte growth factor, Itga6 - integrin alpha 6, Itgav - integrin alpha v, Cyth3 - cytohesin 3, Spp1 - secreted phosphoprotein 1, Kank2 - kn motif and ankyrin repeat domains 2, Nr1d1 - nuclear receptor subfamily 1, group d, member 1, Pik3r2 - phosphatidylinositol 3-kinase, regulatory subunit, polypeptide 2 (p85 beta), Tspan14 - tetraspanin 14, Tlr13 - toll-like receptor 13, Sorbs3 - sor…
GO:0055065	metal ion homeostasis	1.99e-05	0.00423	2.33	11038	325	423	29	[S100b - s100 protein, beta polypeptide, neural, Hyal2 - hyaluronoglucosaminidase 2, Gna15 - guanine nucleotide binding protein, alpha 15, Itgav - integrin alpha v, Bok - bcl2-related ovarian killer protein, Sgk1 - serum/glucocorticoid regulated kinase 1, Camk2d - calcium/calmodulin-dependent protein kinase ii, delta, Atp2a3 - atpase, ca++ transporting, ubiquitous, Spp1 - secreted phosphoprotein …
GO:0098771	inorganic ion homeostasis	2.26e-05	0.00475	2.2	11038	379	423	32	[S100b - s100 protein, beta polypeptide, neural, Hyal2 - hyaluronoglucosaminidase 2, Gna15 - guanine nucleotide binding protein, alpha 15, Itgav - integrin alpha v, Bok - bcl2-related ovarian killer protein, Sgk1 - serum/glucocorticoid regulated kinase 1, Camk2d - calcium/calmodulin-dependent protein kinase ii, delta, Atp2a3 - atpase, ca++ transporting, ubiquitous, Spp1 - secreted phosphoprotein …
GO:0072507	divalent inorganic cation homeostasis	2.31e-05	0.00478	2.56	11038	245	423	24	[S100b - s100 protein, beta polypeptide, neural, Gna15 - guanine nucleotide binding protein, alpha 15, Trpv4 - transient receptor potential cation channel, subfamily v, member 4, Lpar6 - lysophosphatidic acid receptor 6, Itgav - integrin alpha v, Bok - bcl2-related ovarian killer protein, Tgm2 - transglutaminase 2, c polypeptide, Camk2d - calcium/calmodulin-dependent protein kinase ii, delta, Cls…
GO:0051962	positive regulation of nervous system development	2.39e-05	0.00486	2.2	11038	380	423	32	[Hgf - hepatocyte growth factor, Itga6 - integrin alpha 6, S100b - s100 protein, beta polypeptide, neural, Mob2 - mob kinase activator 2, Bmp2 - bone morphogenetic protein 2, Timp2 - tissue inhibitor of metalloproteinase 2, Sgk1 - serum/glucocorticoid regulated kinase 1, Palm - paralemmin, Plxna4 - plexin a4, Skil - ski-like, Tsc2 - tuberous sclerosis 2, Xrcc5 - x-ray repair complementing defecti…
GO:0048878	chemical homeostasis	2.41e-05	0.00485	1.91	11038	600	423	44	[S100b - s100 protein, beta polypeptide, neural, Pde3b - phosphodiesterase 3b, cgmp-inhibited, Hyal2 - hyaluronoglucosaminidase 2, Gna15 - guanine nucleotide binding protein, alpha 15, Itgav - integrin alpha v, Bok - bcl2-related ovarian killer protein, Sgk1 - serum/glucocorticoid regulated kinase 1, Camk2d - calcium/calmodulin-dependent protein kinase ii, delta, Gas6 - growth arrest specific 6, …
GO:0023051	regulation of signaling	2.47e-05	0.00489	1.43	11038	2067	423	113	[Hgf - hepatocyte growth factor, Itga6 - integrin alpha 6, Itgav - integrin alpha v, Cyth3 - cytohesin 3, Spp1 - secreted phosphoprotein 1, Kank2 - kn motif and ankyrin repeat domains 2, Nr1d1 - nuclear receptor subfamily 1, group d, member 1, Pik3r2 - phosphatidylinositol 3-kinase, regulatory subunit, polypeptide 2 (p85 beta), Tspan14 - tetraspanin 14, Tlr13 - toll-like receptor 13, Sorbs3 - sor…
GO:0045124	regulation of bone resorption	2.6e-05	0.00507	6.33	11038	33	423	8	[Itgav - integrin alpha v, P2rx7 - purinergic receptor p2x, ligand-gated ion channel, 7, Gpr137b - g protein-coupled receptor 137b, Spp1 - secreted phosphoprotein 1, Plekhm1 - pleckstrin homology domain containing, family m (with run domain) member 1, S1pr1 - sphingosine-1-phosphate receptor 1, Inpp5d - inositol polyphosphate-5-phosphatase d, Ppargc1b - peroxisome proliferative activated receptor…
GO:0007186	G protein-coupled receptor signaling pathway	2.82e-05	0.00543	2.59	11038	232	423	23	[P2ry13 - purinergic receptor p2y, g-protein coupled 13, Gna15 - guanine nucleotide binding protein, alpha 15, Lpar6 - lysophosphatidic acid receptor 6, Tgm2 - transglutaminase 2, c polypeptide, Rgs7bp - regulator of g-protein signalling 7 binding protein, Adcy3 - adenylate cyclase 3, Gpr183 - g protein-coupled receptor 183, Palm - paralemmin, Spns2 - spinster homolog 2, Ccr1l1 - chemokine (c-c m…
GO:0072503	cellular divalent inorganic cation homeostasis	3.02e-05	0.00574	2.58	11038	233	423	23	[S100b - s100 protein, beta polypeptide, neural, Gna15 - guanine nucleotide binding protein, alpha 15, Trpv4 - transient receptor potential cation channel, subfamily v, member 4, Lpar6 - lysophosphatidic acid receptor 6, Itgav - integrin alpha v, Bok - bcl2-related ovarian killer protein, Tgm2 - transglutaminase 2, c polypeptide, Camk2d - calcium/calmodulin-dependent protein kinase ii, delta, Cls…
GO:1905521	regulation of macrophage migration	3.28e-05	0.00615	6.14	11038	34	423	8	[Trem2 - triggering receptor expressed on myeloid cells 2, Emilin1 - elastin microfibril interfacer 1, Trpv4 - transient receptor potential cation channel, subfamily v, member 4, Mmp14 - matrix metallopeptidase 14 (membrane-inserted), Mtus1 - mitochondrial tumor suppressor 1, P2ry12 - purinergic receptor p2y, g-protein coupled 12, Cx3cr1 - chemokine (c-x3-c) receptor 1, Cd9 - cd9 antigen]
GO:0007167	enzyme linked receptor protein signaling pathway	3.72e-05	0.00686	2.33	11038	302	423	27	[Hgf - hepatocyte growth factor, Bmp2 - bone morphogenetic protein 2, Adam9 - a disintegrin and metallopeptidase domain 9 (meltrin gamma), Pdgfb - platelet derived growth factor, b polypeptide, Skil - ski-like, Gas6 - growth arrest specific 6, Itgb5 - integrin beta 5, Sla - src-like adaptor, Tsc2 - tuberous sclerosis 2, Dok4 - docking protein 4, Fermt2 - fermitin family homolog 2 (drosophila), Pi…
GO:0048518	positive regulation of biological process	3.75e-05	0.00683	1.26	11038	3858	423	187	[Hgf - hepatocyte growth factor, Itga6 - integrin alpha 6, Tnfsf8 - tumor necrosis factor (ligand) superfamily, member 8, Amotl1 - angiomotin-like 1, Itgav - integrin alpha v, Cyth3 - cytohesin 3, Ppm1f - protein phosphatase 1f (pp2c domain containing), Sgk1 - serum/glucocorticoid regulated kinase 1, Scoc - short coiled-coil protein, Plxna4 - plexin a4, Spp1 - secreted phosphoprotein 1, Pdlim7 - …
GO:0034103	regulation of tissue remodeling	3.82e-05	0.00688	4.74	11038	55	423	10	[Tmbim1 - transmembrane bax inhibitor motif containing 1, Itgav - integrin alpha v, P2rx7 - purinergic receptor p2x, ligand-gated ion channel, 7, Gpr137b - g protein-coupled receptor 137b, Spp1 - secreted phosphoprotein 1, Plekhm1 - pleckstrin homology domain containing, family m (with run domain) member 1, B4galt1 - udp-gal:betaglcnac beta 1,4- galactosyltransferase, polypeptide 1, S1pr1 - sphin…
GO:0055080	cation homeostasis	3.92e-05	0.00695	2.17	11038	372	423	31	[S100b - s100 protein, beta polypeptide, neural, Hyal2 - hyaluronoglucosaminidase 2, Gna15 - guanine nucleotide binding protein, alpha 15, Itgav - integrin alpha v, Bok - bcl2-related ovarian killer protein, Sgk1 - serum/glucocorticoid regulated kinase 1, Camk2d - calcium/calmodulin-dependent protein kinase ii, delta, Atp2a3 - atpase, ca++ transporting, ubiquitous, Spp1 - secreted phosphoprotein …
GO:0006897	endocytosis	3.94e-05	0.00691	2.33	11038	303	423	27	[Itgav - integrin alpha v, Gas6 - growth arrest specific 6, Anxa3 - annexin a3, Fchsd2 - fch and double sh3 domains 2, Calcrl - calcitonin receptor-like, Myo1e - myosin ie, Trem2 - triggering receptor expressed on myeloid cells 2, Tgfbr2 - transforming growth factor, beta receptor ii, Dnm1 - dynamin 1, Tgm2 - transglutaminase 2, c polypeptide, Rin2 - ras and rab interactor 2, Rab34 - rab34, membe…
GO:0007162	negative regulation of cell adhesion	4.01e-05	0.00694	2.75	11038	190	423	20	[Vsig4 - v-set and immunoglobulin domain containing 4, Cd276 - cd276 antigen, Pde3b - phosphodiesterase 3b, cgmp-inhibited, Trpv4 - transient receptor potential cation channel, subfamily v, member 4, Ppm1f - protein phosphatase 1f (pp2c domain containing), Rasa1 - ras p21 protein activator 1, Bmp2 - bone morphogenetic protein 2, Plxna4 - plexin a4, Tnfrsf21 - tumor necrosis factor receptor superf…
GO:0050727	regulation of inflammatory response	4.17e-05	0.00712	2.47	11038	254	423	24	[Vsig4 - v-set and immunoglobulin domain containing 4, Trem2 - triggering receptor expressed on myeloid cells 2, Hgf - hepatocyte growth factor, Cd276 - cd276 antigen, Hyal2 - hyaluronoglucosaminidase 2, Trpv4 - transient receptor potential cation channel, subfamily v, member 4, Tgm2 - transglutaminase 2, c polypeptide, Nupr1 - nuclear protein transcription regulator 1, Cd200r4 - cd200 receptor 4…
GO:0051174	regulation of phosphorus metabolic process	4.55e-05	0.00768	1.6	11038	1144	423	70	[Hgf - hepatocyte growth factor, Itga6 - integrin alpha 6, Ppm1f - protein phosphatase 1f (pp2c domain containing), Camk2d - calcium/calmodulin-dependent protein kinase ii, delta, Pik3r2 - phosphatidylinositol 3-kinase, regulatory subunit, polypeptide 2 (p85 beta), Tlr13 - toll-like receptor 13, Sorbs3 - sorbin and sh3 domain containing 3, Bcl2 - b cell leukemia/lymphoma 2, Cspg4 - chondroitin su…
GO:0006909	phagocytosis	4.91e-05	0.00819	4.22	11038	68	423	11	[Trem2 - triggering receptor expressed on myeloid cells 2, Lrp1 - low density lipoprotein receptor-related protein 1, Itgav - integrin alpha v, Tgm2 - transglutaminase 2, c polypeptide, Mfge8 - milk fat globule-egf factor 8 protein, Myo7a - myosin viia, Gas6 - growth arrest specific 6, Nr1h3 - nuclear receptor subfamily 1, group h, member 3, Anxa3 - annexin a3, Mertk - c-mer proto-oncogene tyrosi…
GO:0048856	anatomical structure development	5.54e-05	0.00914	1.43	11038	1922	423	105	[Hgf - hepatocyte growth factor, Itga6 - integrin alpha 6, Itgav - integrin alpha v, Plxna4 - plexin a4, Spp1 - secreted phosphoprotein 1, Pdlim7 - pdz and lim domain 7, Kank2 - kn motif and ankyrin repeat domains 2, Lamb2 - laminin, beta 2, Calcrl - calcitonin receptor-like, 2510009E07Rik - riken cdna 2510009e07 gene, Spire1 - spire homolog 1 (drosophila), Fmnl3 - formin-like 3, Mef2a - myocyte …
GO:1901343	negative regulation of vasculature development	5.7e-05	0.00929	3.61	11038	94	423	13	[Pde3b - phosphodiesterase 3b, cgmp-inhibited, Sparc - secreted acidic cysteine rich glycoprotein, Pdgfb - platelet derived growth factor, b polypeptide, Ecscr - endothelial cell surface expressed chemotaxis and apoptosis regulator, Thbs2 - thrombospondin 2, Fbln5 - fibulin 5, Serpine1 - serine (or cysteine) peptidase inhibitor, clade e, member 1, Emilin1 - elastin microfibril interfacer 1, Pik3r…
GO:0060348	bone development	6.15e-05	0.00991	4.5	11038	58	423	10	[Mapk11 - mitogen-activated protein kinase 11, Sparc - secreted acidic cysteine rich glycoprotein, Pdgfc - platelet-derived growth factor, c polypeptide, Tmem38b - transmembrane protein 38b, Bmp2 - bone morphogenetic protein 2, Sulf2 - sulfatase 2, Mmp14 - matrix metallopeptidase 14 (membrane-inserted), Spns2 - spinster homolog 2, Cfh - complement component factor h, Pls3 - plastin 3 (t-isoform)]
GO:0007044	cell-substrate junction assembly	6.79e-05	0.0108	6.52	11038	28	423	7	[Fn1 - fibronectin 1, Fermt2 - fermitin family homolog 2 (drosophila), Itgav - integrin alpha v, Thsd1 - thrombospondin, type i, domain 1, Bcl2 - b cell leukemia/lymphoma 2, Tns1 - tensin 1, Actn1 - actinin, alpha 1]
GO:0042325	regulation of phosphorylation	6.83e-05	0.0107	1.62	11038	1032	423	64	[Hgf - hepatocyte growth factor, Itga6 - integrin alpha 6, Ppm1f - protein phosphatase 1f (pp2c domain containing), Camk2d - calcium/calmodulin-dependent protein kinase ii, delta, Pik3r2 - phosphatidylinositol 3-kinase, regulatory subunit, polypeptide 2 (p85 beta), Tlr13 - toll-like receptor 13, Sorbs3 - sorbin and sh3 domain containing 3, Bcl2 - b cell leukemia/lymphoma 2, Cspg4 - chondroitin su…
GO:0010648	negative regulation of cell communication	7.3e-05	0.0114	1.67	11038	889	423	57	[Hgf - hepatocyte growth factor, Itga6 - integrin alpha 6, Itgav - integrin alpha v, Meis3 - meis homeobox 3, Ecm1 - extracellular matrix protein 1, Palm - paralemmin, Kank2 - kn motif and ankyrin repeat domains 2, Nr1d1 - nuclear receptor subfamily 1, group d, member 1, Pik3r2 - phosphatidylinositol 3-kinase, regulatory subunit, polypeptide 2 (p85 beta), Bcl2 - b cell leukemia/lymphoma 2, Pmepa1…
GO:0050896	response to stimulus	7.49e-05	0.0115	1.31	11038	2944	423	148	[Tnfsf8 - tumor necrosis factor (ligand) superfamily, member 8, Hgf - hepatocyte growth factor, Itga6 - integrin alpha 6, Itgav - integrin alpha v, Ppm1f - protein phosphatase 1f (pp2c domain containing), Sgk1 - serum/glucocorticoid regulated kinase 1, 4930486L24Rik - riken cdna 4930486l24 gene, Spp1 - secreted phosphoprotein 1, Nr1d1 - nuclear receptor subfamily 1, group d, member 1, Calcrl - ca…
GO:0023057	negative regulation of signaling	7.53e-05	0.0115	1.67	11038	890	423	57	[Hgf - hepatocyte growth factor, Itga6 - integrin alpha 6, Itgav - integrin alpha v, Meis3 - meis homeobox 3, Ecm1 - extracellular matrix protein 1, Palm - paralemmin, Kank2 - kn motif and ankyrin repeat domains 2, Nr1d1 - nuclear receptor subfamily 1, group d, member 1, Pik3r2 - phosphatidylinositol 3-kinase, regulatory subunit, polypeptide 2 (p85 beta), Bcl2 - b cell leukemia/lymphoma 2, Pmepa1…
GO:0046850	regulation of bone remodeling	7.73e-05	0.0116	5.49	11038	38	423	8	[Itgav - integrin alpha v, P2rx7 - purinergic receptor p2x, ligand-gated ion channel, 7, Gpr137b - g protein-coupled receptor 137b, Spp1 - secreted phosphoprotein 1, Plekhm1 - pleckstrin homology domain containing, family m (with run domain) member 1, S1pr1 - sphingosine-1-phosphate receptor 1, Inpp5d - inositol polyphosphate-5-phosphatase d, Ppargc1b - peroxisome proliferative activated receptor…
GO:0019220	regulation of phosphate metabolic process	7.94e-05	0.0118	1.58	11038	1143	423	69	[Hgf - hepatocyte growth factor, Itga6 - integrin alpha 6, Ppm1f - protein phosphatase 1f (pp2c domain containing), Camk2d - calcium/calmodulin-dependent protein kinase ii, delta, Pik3r2 - phosphatidylinositol 3-kinase, regulatory subunit, polypeptide 2 (p85 beta), Tlr13 - toll-like receptor 13, Sorbs3 - sorbin and sh3 domain containing 3, Bcl2 - b cell leukemia/lymphoma 2, Cspg4 - chondroitin su…
GO:2000181	negative regulation of blood vessel morphogenesis	8.93e-05	0.0132	3.68	11038	85	423	12	[Pde3b - phosphodiesterase 3b, cgmp-inhibited, Serpine1 - serine (or cysteine) peptidase inhibitor, clade e, member 1, Emilin1 - elastin microfibril interfacer 1, Sparc - secreted acidic cysteine rich glycoprotein, Pik3r2 - phosphatidylinositol 3-kinase, regulatory subunit, polypeptide 2 (p85 beta), Ecscr - endothelial cell surface expressed chemotaxis and apoptosis regulator, Ptprm - protein tyr…
GO:1901701	cellular response to oxygen-containing compound	9.52e-05	0.0139	1.93	11038	501	423	37	[Pde3b - phosphodiesterase 3b, cgmp-inhibited, Sgk1 - serum/glucocorticoid regulated kinase 1, Adam9 - a disintegrin and metallopeptidase domain 9 (meltrin gamma), Plscr4 - phospholipid scramblase 4, Pdgfb - platelet derived growth factor, b polypeptide, Gas6 - growth arrest specific 6, Spp1 - secreted phosphoprotein 1, Tsc2 - tuberous sclerosis 2, Klf9 - kruppel-like factor 9, Serpine1 - serine …
GO:0070887	cellular response to chemical stimulus	9.79e-05	0.0141	1.58	11038	1087	423	66	[Hgf - hepatocyte growth factor, Ppm1f - protein phosphatase 1f (pp2c domain containing), Sgk1 - serum/glucocorticoid regulated kinase 1, Spp1 - secreted phosphoprotein 1, Syngr1 - synaptogyrin 1, Klf9 - kruppel-like factor 9, Nr1d1 - nuclear receptor subfamily 1, group d, member 1, Calcrl - calcitonin receptor-like, Pik3r2 - phosphatidylinositol 3-kinase, regulatory subunit, polypeptide 2 (p85 b…
GO:1901342	regulation of vasculature development	9.95e-05	0.0142	2.44	11038	235	423	22	[Hgf - hepatocyte growth factor, Pde3b - phosphodiesterase 3b, cgmp-inhibited, Tgfbr2 - transforming growth factor, beta receptor ii, Sparc - secreted acidic cysteine rich glycoprotein, Rin2 - ras and rab interactor 2, Ecm1 - extracellular matrix protein 1, Ets1 - e26 avian leukemia oncogene 1, 5' domain, Pdgfb - platelet derived growth factor, b polypeptide, Ecscr - endothelial cell surface expr…
GO:0042327	positive regulation of phosphorylation	0.000104	0.0147	1.78	11038	658	423	45	[Hgf - hepatocyte growth factor, Itga6 - integrin alpha 6, Cdc25b - cell division cycle 25b, Bmp2 - bone morphogenetic protein 2, Mob2 - mob kinase activator 2, Timp2 - tissue inhibitor of metalloproteinase 2, Camk2d - calcium/calmodulin-dependent protein kinase ii, delta, Adam9 - a disintegrin and metallopeptidase domain 9 (meltrin gamma), Pdgfb - platelet derived growth factor, b polypeptide, G…
GO:0010810	regulation of cell-substrate adhesion	0.000106	0.0149	2.83	11038	157	423	17	[Itga6 - integrin alpha 6, Fn1 - fibronectin 1, Ppm1f - protein phosphatase 1f (pp2c domain containing), Rin2 - ras and rab interactor 2, Rasa1 - ras p21 protein activator 1, Pdgfb - platelet derived growth factor, b polypeptide, Spp1 - secreted phosphoprotein 1, Pdpn - podoplanin, Nedd9 - neural precursor cell expressed, developmentally down-regulated gene 9, Serpine1 - serine (or cysteine) pept…
GO:0006873	cellular ion homeostasis	0.000114	0.0158	2.15	11038	340	423	28	[S100b - s100 protein, beta polypeptide, neural, Gna15 - guanine nucleotide binding protein, alpha 15, Itgav - integrin alpha v, Bok - bcl2-related ovarian killer protein, Sgk1 - serum/glucocorticoid regulated kinase 1, Camk2d - calcium/calmodulin-dependent protein kinase ii, delta, Atp2a3 - atpase, ca++ transporting, ubiquitous, Spp1 - secreted phosphoprotein 1, Ccr1l1 - chemokine (c-c motif) re…
GO:0065007	biological regulation	0.000117	0.0161	1.14	11038	6810	423	297	[Vsig4 - v-set and immunoglobulin domain containing 4, Tnfsf8 - tumor necrosis factor (ligand) superfamily, member 8, Ppm1f - protein phosphatase 1f (pp2c domain containing), Sgk1 - serum/glucocorticoid regulated kinase 1, Hpgds - hematopoietic prostaglandin d synthase, Ctla2a - cytotoxic t lymphocyte-associated protein 2 alpha, Plxna4 - plexin a4, Ctsd - cathepsin d, Calcrl - calcitonin receptor…
GO:0035025	positive regulation of Rho protein signal transduction	0.000121	0.0165	9.32	11038	14	423	5	[Arhgef3 - rho guanine nucleotide exchange factor (gef) 3, Lpar6 - lysophosphatidic acid receptor 6, F11r - f11 receptor, A630033H20Rik - riken cdna a630033h20 gene, D8Ertd82e - dna segment, chr 8, erato doi 82, expressed]
GO:0006875	cellular metal ion homeostasis	0.000122	0.0164	2.26	11038	289	423	25	[S100b - s100 protein, beta polypeptide, neural, Gna15 - guanine nucleotide binding protein, alpha 15, Itgav - integrin alpha v, Bok - bcl2-related ovarian killer protein, Sgk1 - serum/glucocorticoid regulated kinase 1, Camk2d - calcium/calmodulin-dependent protein kinase ii, delta, Atp2a3 - atpase, ca++ transporting, ubiquitous, Spp1 - secreted phosphoprotein 1, Ccr1l1 - chemokine (c-c motif) re…
GO:1902533	positive regulation of intracellular signal transduction	0.000124	0.0166	1.77	11038	663	423	45	[Hgf - hepatocyte growth factor, S100b - s100 protein, beta polypeptide, neural, Meis3 - meis homeobox 3, Bok - bcl2-related ovarian killer protein, Bmp2 - bone morphogenetic protein 2, Timp2 - tissue inhibitor of metalloproteinase 2, Camk2d - calcium/calmodulin-dependent protein kinase ii, delta, Adam9 - a disintegrin and metallopeptidase domain 9 (meltrin gamma), Pdgfb - platelet derived growth…
GO:0001932	regulation of protein phosphorylation	0.000126	0.0167	1.63	11038	928	423	58	[Hgf - hepatocyte growth factor, Ppm1f - protein phosphatase 1f (pp2c domain containing), Camk2d - calcium/calmodulin-dependent protein kinase ii, delta, Pik3r2 - phosphatidylinositol 3-kinase, regulatory subunit, polypeptide 2 (p85 beta), Tlr13 - toll-like receptor 13, Sorbs3 - sorbin and sh3 domain containing 3, Bcl2 - b cell leukemia/lymphoma 2, Cspg4 - chondroitin sulfate proteoglycan 4, Eef2…
GO:0007015	actin filament organization	0.00013	0.017	2.68	11038	175	423	18	[Trpv4 - transient receptor potential cation channel, subfamily v, member 4, Zbed3 - zinc finger, bed domain containing 3, Itgb5 - integrin beta 5, Nedd9 - neural precursor cell expressed, developmentally down-regulated gene 9, Actn1 - actinin, alpha 1, Dpysl3 - dihydropyrimidinase-like 3, Myo1f - myosin if, Spire1 - spire homolog 1 (drosophila), Sorbs3 - sorbin and sh3 domain containing 3, Myo7a…
GO:1902531	regulation of intracellular signal transduction	0.000131	0.017	1.55	11038	1162	423	69	[Hgf - hepatocyte growth factor, S100b - s100 protein, beta polypeptide, neural, Meis3 - meis homeobox 3, Cyth3 - cytohesin 3, Camk2d - calcium/calmodulin-dependent protein kinase ii, delta, Kank2 - kn motif and ankyrin repeat domains 2, Nr1d1 - nuclear receptor subfamily 1, group d, member 1, Pik3r2 - phosphatidylinositol 3-kinase, regulatory subunit, polypeptide 2 (p85 beta), Tlr13 - toll-like …
GO:1900426	positive regulation of defense response to bacterium	0.000132	0.0169	13.05	11038	8	423	4	[Rab34 - rab34, member of ras oncogene family, Havcr2 - hepatitis a virus cellular receptor 2, Lgals9 - lectin, galactose binding, soluble 9, Grn - granulin]
GO:0120035	regulation of plasma membrane bounded cell projection organization	0.000132	0.0167	1.9	11038	509	423	37	[Hgf - hepatocyte growth factor, Itga6 - integrin alpha 6, Mob2 - mob kinase activator 2, Sgk1 - serum/glucocorticoid regulated kinase 1, Palm - paralemmin, Bag5 - bcl2-associated athanogene 5, Skil - ski-like, Plxna4 - plexin a4, Tsc2 - tuberous sclerosis 2, Ccr5 - chemokine (c-c motif) receptor 5, Cspg4 - chondroitin sulfate proteoglycan 4, Eef2k - eukaryotic elongation factor-2 kinase, D8Ertd8…
GO:0050769	positive regulation of neurogenesis	0.000133	0.0167	2.1	11038	361	423	29	[Hgf - hepatocyte growth factor, Itga6 - integrin alpha 6, Mob2 - mob kinase activator 2, Bmp2 - bone morphogenetic protein 2, Timp2 - tissue inhibitor of metalloproteinase 2, Sgk1 - serum/glucocorticoid regulated kinase 1, Palm - paralemmin, Plxna4 - plexin a4, Skil - ski-like, Tsc2 - tuberous sclerosis 2, Xrcc5 - x-ray repair complementing defective repair in chinese hamster cells 5, Ccr5 - che…
GO:1903034	regulation of response to wounding	0.000135	0.0169	3.15	11038	116	423	14	[F11r - f11 receptor, Cd109 - cd109 antigen, Hpse - heparanase, Pdgfb - platelet derived growth factor, b polypeptide, Pdpn - podoplanin, Grn - granulin, Serpine1 - serine (or cysteine) peptidase inhibitor, clade e, member 1, Neo1 - neogenin, Lrp1 - low density lipoprotein receptor-related protein 1, Fermt2 - fermitin family homolog 2 (drosophila), Pros1 - protein s (alpha), Rtn4rl1 - reticulon 4…
GO:0010720	positive regulation of cell development	0.000136	0.0168	2.01	11038	416	423	32	[Hgf - hepatocyte growth factor, Itga6 - integrin alpha 6, Bmp2 - bone morphogenetic protein 2, Mob2 - mob kinase activator 2, Timp2 - tissue inhibitor of metalloproteinase 2, Sgk1 - serum/glucocorticoid regulated kinase 1, Palm - paralemmin, Skil - ski-like, Plxna4 - plexin a4, Tsc2 - tuberous sclerosis 2, Xrcc5 - x-ray repair complementing defective repair in chinese hamster cells 5, Fermt2 - f…
GO:0031347	regulation of defense response	0.000136	0.0167	1.93	11038	472	423	35	[Hgf - hepatocyte growth factor, Vsig4 - v-set and immunoglobulin domain containing 4, Cd276 - cd276 antigen, Hyal2 - hyaluronoglucosaminidase 2, Nlrc3 - nlr family, card domain containing 3, Ctla2a - cytotoxic t lymphocyte-associated protein 2 alpha, Rftn1 - raftlin lipid raft linker 1, Serpine1 - serine (or cysteine) peptidase inhibitor, clade e, member 1, Nr1d1 - nuclear receptor subfamily 1, …
GO:0080134	regulation of response to stress	0.000138	0.0168	1.59	11038	1015	423	62	[Hgf - hepatocyte growth factor, Vsig4 - v-set and immunoglobulin domain containing 4, Cd276 - cd276 antigen, Ctla2a - cytotoxic t lymphocyte-associated protein 2 alpha, Rftn1 - raftlin lipid raft linker 1, Nr1d1 - nuclear receptor subfamily 1, group d, member 1, Calcrl - calcitonin receptor-like, Tlr13 - toll-like receptor 13, Spire1 - spire homolog 1 (drosophila), Ube2g2 - ubiquitin-conjugating…
GO:0031214	biomineral tissue development	0.000139	0.0168	4.52	11038	52	423	9	[Fam20a - family with sequence similarity 20, member a, Srgn - serglycin, Enpp1 - ectonucleotide pyrophosphatase/phosphodiesterase 1, Fam20c - family with sequence similarity 20, member c, Eif2ak3 - eukaryotic translation initiation factor 2 alpha kinase 3, Tmem38b - transmembrane protein 38b, Ecm1 - extracellular matrix protein 1, Bmp2 - bone morphogenetic protein 2, Spp1 - secreted phosphoprote…
GO:0030029	actin filament-based process	0.000146	0.0174	2.28	11038	275	423	24	[Amotl1 - angiomotin-like 1, Trpv4 - transient receptor potential cation channel, subfamily v, member 4, Epb4.1l2 - erythrocyte protein band 4.1-like 2, Mob2 - mob kinase activator 2, F11r - f11 receptor, Camk2d - calcium/calmodulin-dependent protein kinase ii, delta, Stard8 - start domain containing 8, Pdgfb - platelet derived growth factor, b polypeptide, Pdpn - podoplanin, Itgb5 - integrin bet…
GO:0045937	positive regulation of phosphate metabolic process	0.000148	0.0175	1.73	11038	708	423	47	[Hgf - hepatocyte growth factor, Itga6 - integrin alpha 6, Cdc25b - cell division cycle 25b, Bmp2 - bone morphogenetic protein 2, Mob2 - mob kinase activator 2, Timp2 - tissue inhibitor of metalloproteinase 2, Camk2d - calcium/calmodulin-dependent protein kinase ii, delta, Adam9 - a disintegrin and metallopeptidase domain 9 (meltrin gamma), Pdgfb - platelet derived growth factor, b polypeptide, G…
GO:0010562	positive regulation of phosphorus metabolic process	0.000148	0.0174	1.73	11038	708	423	47	[Hgf - hepatocyte growth factor, Itga6 - integrin alpha 6, Cdc25b - cell division cycle 25b, Bmp2 - bone morphogenetic protein 2, Mob2 - mob kinase activator 2, Timp2 - tissue inhibitor of metalloproteinase 2, Camk2d - calcium/calmodulin-dependent protein kinase ii, delta, Adam9 - a disintegrin and metallopeptidase domain 9 (meltrin gamma), Pdgfb - platelet derived growth factor, b polypeptide, G…
GO:0031344	regulation of cell projection organization	0.000148	0.0173	1.89	11038	512	423	37	[Hgf - hepatocyte growth factor, Itga6 - integrin alpha 6, Mob2 - mob kinase activator 2, Sgk1 - serum/glucocorticoid regulated kinase 1, Palm - paralemmin, Bag5 - bcl2-associated athanogene 5, Skil - ski-like, Plxna4 - plexin a4, Tsc2 - tuberous sclerosis 2, Ccr5 - chemokine (c-c motif) receptor 5, Cspg4 - chondroitin sulfate proteoglycan 4, Eef2k - eukaryotic elongation factor-2 kinase, D8Ertd8…
GO:0097435	supramolecular fiber organization	0.000149	0.0171	2.19	11038	310	423	26	[Sgk1 - serum/glucocorticoid regulated kinase 1, Itgb5 - integrin beta 5, Actn1 - actinin, alpha 1, Spire1 - spire homolog 1 (drosophila), Sorbs3 - sorbin and sh3 domain containing 3, B4galt7 - xylosylprotein beta1,4-galactosyltransferase, polypeptide 7 (galactosyltransferase i), Myo1e - myosin ie, Fmn1 - formin 1, Nck2 - non-catalytic region of tyrosine kinase adaptor protein 2, Msrb2 - methioni…
GO:0001817	regulation of cytokine production	0.000155	0.0177	1.9	11038	494	423	36	[Hgf - hepatocyte growth factor, Vsig4 - v-set and immunoglobulin domain containing 4, Cd276 - cd276 antigen, S100b - s100 protein, beta polypeptide, neural, Hyal2 - hyaluronoglucosaminidase 2, Itgav - integrin alpha v, Nlrc3 - nlr family, card domain containing 3, Gas6 - growth arrest specific 6, Inpp5d - inositol polyphosphate-5-phosphatase d, Serpine1 - serine (or cysteine) peptidase inhibitor…
GO:0098609	cell-cell adhesion	0.000162	0.0184	2.64	11038	178	423	18	[Itga6 - integrin alpha 6, Fn1 - fibronectin 1, Tgfbr2 - transforming growth factor, beta receptor ii, Kifc3 - kinesin family member c3, Itgav - integrin alpha v, F11r - f11 receptor, Adam9 - a disintegrin and metallopeptidase domain 9 (meltrin gamma), Clstn1 - calsyntenin 1, Pdpn - podoplanin, Itgb5 - integrin beta 5, Olr1 - oxidized low density lipoprotein (lectin-like) receptor 1, Plxnb2 - ple…
GO:0019725	cellular homeostasis	0.000181	0.0204	1.91	11038	479	423	35	[S100b - s100 protein, beta polypeptide, neural, Gna15 - guanine nucleotide binding protein, alpha 15, Itgav - integrin alpha v, Bok - bcl2-related ovarian killer protein, Sgk1 - serum/glucocorticoid regulated kinase 1, Camk2d - calcium/calmodulin-dependent protein kinase ii, delta, Gas6 - growth arrest specific 6, Spp1 - secreted phosphoprotein 1, Atp2a3 - atpase, ca++ transporting, ubiquitous, …
GO:0009607	response to biotic stimulus	0.000183	0.0204	1.83	11038	556	423	39	[Tnfsf8 - tumor necrosis factor (ligand) superfamily, member 8, Hyal2 - hyaluronoglucosaminidase 2, Itgav - integrin alpha v, Slc17a5 - solute carrier family 17 (anion/sugar transporter), member 5, Bmp2 - bone morphogenetic protein 2, Nlrc3 - nlr family, card domain containing 3, Adam9 - a disintegrin and metallopeptidase domain 9 (meltrin gamma), Plscr4 - phospholipid scramblase 4, Anxa3 - annex…
GO:0014013	regulation of gliogenesis	0.000193	0.0214	3.4	11038	92	423	12	[Trem2 - triggering receptor expressed on myeloid cells 2, Nr1d1 - nuclear receptor subfamily 1, group d, member 1, Lrp1 - low density lipoprotein receptor-related protein 1, Bmp2 - bone morphogenetic protein 2, Gpr183 - g protein-coupled receptor 183, Pmp22 - peripheral myelin protein 22, Ski - ski sarcoma viral oncogene homolog (avian), Bin1 - bridging integrator 1, Tnfrsf21 - tumor necrosis fa…
GO:0048145	regulation of fibroblast proliferation	0.000198	0.0218	3.63	11038	79	423	11	[Serpine1 - serine (or cysteine) peptidase inhibitor, clade e, member 1, Fn1 - fibronectin 1, Pdgfc - platelet-derived growth factor, c polypeptide, Rasa1 - ras p21 protein activator 1, Nupr1 - nuclear protein transcription regulator 1, B4galt7 - xylosylprotein beta1,4-galactosyltransferase, polypeptide 7 (galactosyltransferase i), Nlrc3 - nlr family, card domain containing 3, Ski - ski sarcoma v…
GO:0030003	cellular cation homeostasis	0.000204	0.0222	2.11	11038	334	423	27	[S100b - s100 protein, beta polypeptide, neural, Gna15 - guanine nucleotide binding protein, alpha 15, Itgav - integrin alpha v, Bok - bcl2-related ovarian killer protein, Sgk1 - serum/glucocorticoid regulated kinase 1, Camk2d - calcium/calmodulin-dependent protein kinase ii, delta, Atp2a3 - atpase, ca++ transporting, ubiquitous, Spp1 - secreted phosphoprotein 1, Ccr1l1 - chemokine (c-c motif) re…
GO:0001775	cell activation	0.000213	0.023	2.04	11038	371	423	29	[Tnfsf8 - tumor necrosis factor (ligand) superfamily, member 8, Cd276 - cd276 antigen, Hyal2 - hyaluronoglucosaminidase 2, Itgav - integrin alpha v, Nlrc3 - nlr family, card domain containing 3, Adam9 - a disintegrin and metallopeptidase domain 9 (meltrin gamma), Anxa3 - annexin a3, Sox4 - sry-box containing gene 4, Armc5 - armadillo repeat containing 5, Havcr2 - hepatitis a virus cellular recept…
GO:0045664	regulation of neuron differentiation	0.000213	0.0229	1.91	11038	464	423	34	[Hgf - hepatocyte growth factor, Itga6 - integrin alpha 6, Bmp2 - bone morphogenetic protein 2, Mob2 - mob kinase activator 2, Timp2 - tissue inhibitor of metalloproteinase 2, Sgk1 - serum/glucocorticoid regulated kinase 1, Palm - paralemmin, Bag5 - bcl2-associated athanogene 5, Skil - ski-like, Plxna4 - plexin a4, Tsc2 - tuberous sclerosis 2, Ccr5 - chemokine (c-c motif) receptor 5, Bcl2 - b cel…
GO:0031348	negative regulation of defense response	0.000217	0.0231	2.76	11038	151	423	16	[Hgf - hepatocyte growth factor, Vsig4 - v-set and immunoglobulin domain containing 4, Cd276 - cd276 antigen, Nlrc3 - nlr family, card domain containing 3, Ets1 - e26 avian leukemia oncogene 1, 5' domain, Ctla2a - cytotoxic t lymphocyte-associated protein 2 alpha, Uaca - uveal autoantigen with coiled-coil domains and ankyrin repeats, Grn - granulin, Nr1d1 - nuclear receptor subfamily 1, group d, …
GO:0009719	response to endogenous stimulus	0.000224	0.0236	1.83	11038	542	423	38	[Pde3b - phosphodiesterase 3b, cgmp-inhibited, Hyal2 - hyaluronoglucosaminidase 2, Bmp2 - bone morphogenetic protein 2, Timp2 - tissue inhibitor of metalloproteinase 2, Sgk1 - serum/glucocorticoid regulated kinase 1, Adam9 - a disintegrin and metallopeptidase domain 9 (meltrin gamma), Spp1 - secreted phosphoprotein 1, Tsc2 - tuberous sclerosis 2, Klf9 - kruppel-like factor 9, Serpine1 - serine (o…
GO:0065008	regulation of biological quality	0.000234	0.0245	1.35	11038	2201	423	114	[Itgav - integrin alpha v, Sgk1 - serum/glucocorticoid regulated kinase 1, Scoc - short coiled-coil protein, Plxna4 - plexin a4, Spp1 - secreted phosphoprotein 1, Nr1d1 - nuclear receptor subfamily 1, group d, member 1, Pik3r2 - phosphatidylinositol 3-kinase, regulatory subunit, polypeptide 2 (p85 beta), Spire1 - spire homolog 1 (drosophila), Fmnl3 - formin-like 3, Gpr137b - g protein-coupled rec…
GO:0048522	positive regulation of cellular process	0.000246	0.0256	1.25	11038	3478	423	167	[Hgf - hepatocyte growth factor, Itga6 - integrin alpha 6, Tnfsf8 - tumor necrosis factor (ligand) superfamily, member 8, Amotl1 - angiomotin-like 1, Itgav - integrin alpha v, Ppm1f - protein phosphatase 1f (pp2c domain containing), Sgk1 - serum/glucocorticoid regulated kinase 1, Scoc - short coiled-coil protein, Plxna4 - plexin a4, Spp1 - secreted phosphoprotein 1, Pdlim7 - pdz and lim domain 7,…
GO:0007166	cell surface receptor signaling pathway	0.000257	0.0265	1.6	11038	932	423	57	[Hgf - hepatocyte growth factor, Itga6 - integrin alpha 6, Cd276 - cd276 antigen, Amotl1 - angiomotin-like 1, Itgav - integrin alpha v, Plxna4 - plexin a4, Itgb5 - integrin beta 5, Rftn1 - raftlin lipid raft linker 1, Calcrl - calcitonin receptor-like, Pik3r2 - phosphatidylinositol 3-kinase, regulatory subunit, polypeptide 2 (p85 beta), Dtx3 - deltex 3 homolog (drosophila), Myo1e - myosin ie, Bcl…
GO:0016525	negative regulation of angiogenesis	0.000277	0.0284	3.5	11038	82	423	11	[Pde3b - phosphodiesterase 3b, cgmp-inhibited, Serpine1 - serine (or cysteine) peptidase inhibitor, clade e, member 1, Emilin1 - elastin microfibril interfacer 1, Sparc - secreted acidic cysteine rich glycoprotein, Pik3r2 - phosphatidylinositol 3-kinase, regulatory subunit, polypeptide 2 (p85 beta), Ecscr - endothelial cell surface expressed chemotaxis and apoptosis regulator, Ptprm - protein tyr…
GO:0010942	positive regulation of cell death	0.000294	0.03	1.82	11038	530	423	37	[Itga6 - integrin alpha 6, S100b - s100 protein, beta polypeptide, neural, Hyal2 - hyaluronoglucosaminidase 2, Bok - bcl2-related ovarian killer protein, Trim35 - tripartite motif-containing 35, Ppm1f - protein phosphatase 1f (pp2c domain containing), Bmp2 - bone morphogenetic protein 2, Camk2d - calcium/calmodulin-dependent protein kinase ii, delta, Skil - ski-like, Atp2a3 - atpase, ca++ transpo…
GO:0007204	positive regulation of cytosolic calcium ion concentration	0.0003	0.0303	2.92	11038	125	423	14	[Gna15 - guanine nucleotide binding protein, alpha 15, Trpv4 - transient receptor potential cation channel, subfamily v, member 4, Itgav - integrin alpha v, Lpar6 - lysophosphatidic acid receptor 6, Tgm2 - transglutaminase 2, c polypeptide, Ccr1l1 - chemokine (c-c motif) receptor 1-like 1, S1pr1 - sphingosine-1-phosphate receptor 1, Lrp1 - low density lipoprotein receptor-related protein 1, Ccr5 …
GO:0034329	cell junction assembly	0.000308	0.031	3.46	11038	83	423	11	[Fn1 - fibronectin 1, Fermt2 - fermitin family homolog 2 (drosophila), Trpv4 - transient receptor potential cation channel, subfamily v, member 4, Itgav - integrin alpha v, Thsd1 - thrombospondin, type i, domain 1, Pmp22 - peripheral myelin protein 22, Bcl2 - b cell leukemia/lymphoma 2, Tns1 - tensin 1, Cd9 - cd9 antigen, Actn1 - actinin, alpha 1, Ophn1 - oligophrenin 1]
GO:0030193	regulation of blood coagulation	0.000315	0.0314	4.54	11038	46	423	8	[Serpine1 - serine (or cysteine) peptidase inhibitor, clade e, member 1, Pros1 - protein s (alpha), F11r - f11 receptor, Hpse - heparanase, Pdgfb - platelet derived growth factor, b polypeptide, Pdpn - podoplanin, Enpp4 - ectonucleotide pyrophosphatase/phosphodiesterase 4, Cd9 - cd9 antigen]
GO:0008360	regulation of cell shape	0.000326	0.0322	2.9	11038	126	423	14	[S100b - s100 protein, beta polypeptide, neural, Fn1 - fibronectin 1, Epb4.1l2 - erythrocyte protein band 4.1-like 2, F11r - f11 receptor, Palm - paralemmin, Plxna4 - plexin a4, Pdpn - podoplanin, Fermt2 - fermitin family homolog 2 (drosophila), Hexb - hexosaminidase b, Fmnl3 - formin-like 3, Plxnb2 - plexin b2, Rhoj - ras homolog gene family, member j, Rhoq - ras homolog gene family, member q, D…
GO:1903975	regulation of glial cell migration	0.000341	0.0335	7.67	11038	17	423	5	[Trem2 - triggering receptor expressed on myeloid cells 2, Lrp1 - low density lipoprotein receptor-related protein 1, Gpr183 - g protein-coupled receptor 183, P2ry12 - purinergic receptor p2y, g-protein coupled 12, Cx3cr1 - chemokine (c-x3-c) receptor 1]
GO:0030194	positive regulation of blood coagulation	0.000341	0.0332	7.67	11038	17	423	5	[Serpine1 - serine (or cysteine) peptidase inhibitor, clade e, member 1, F11r - f11 receptor, Hpse - heparanase, Pdpn - podoplanin, Enpp4 - ectonucleotide pyrophosphatase/phosphodiesterase 4]
GO:1900048	positive regulation of hemostasis	0.000341	0.033	7.67	11038	17	423	5	[Serpine1 - serine (or cysteine) peptidase inhibitor, clade e, member 1, F11r - f11 receptor, Hpse - heparanase, Pdpn - podoplanin, Enpp4 - ectonucleotide pyrophosphatase/phosphodiesterase 4]
GO:0051480	regulation of cytosolic calcium ion concentration	0.00035	0.0337	2.76	11038	142	423	15	[Gna15 - guanine nucleotide binding protein, alpha 15, Trpv4 - transient receptor potential cation channel, subfamily v, member 4, Itgav - integrin alpha v, Bok - bcl2-related ovarian killer protein, Lpar6 - lysophosphatidic acid receptor 6, Tgm2 - transglutaminase 2, c polypeptide, Ccr1l1 - chemokine (c-c motif) receptor 1-like 1, S1pr1 - sphingosine-1-phosphate receptor 1, Lrp1 - low density li…
GO:0050878	regulation of body fluid levels	0.00035	0.0335	2.76	11038	142	423	15	[Trpv4 - transient receptor potential cation channel, subfamily v, member 4, F11r - f11 receptor, Hpse - heparanase, Tifab - traf-interacting protein with forkhead-associated domain, family member b, Pdgfb - platelet derived growth factor, b polypeptide, Gas6 - growth arrest specific 6, Pdpn - podoplanin, Serpine1 - serine (or cysteine) peptidase inhibitor, clade e, member 1, Pros1 - protein s (a…
GO:0050728	negative regulation of inflammatory response	0.000352	0.0334	3.2	11038	98	423	12	[Hgf - hepatocyte growth factor, Cd276 - cd276 antigen, Nr1d1 - nuclear receptor subfamily 1, group d, member 1, Calcrl - calcitonin receptor-like, Nlrc3 - nlr family, card domain containing 3, Ets1 - e26 avian leukemia oncogene 1, 5' domain, Ctla2a - cytotoxic t lymphocyte-associated protein 2 alpha, Nr1h3 - nuclear receptor subfamily 1, group h, member 3, Uaca - uveal autoantigen with coiled-co…
GO:0033993	response to lipid	0.000359	0.0339	2.04	11038	346	423	27	[Sgk1 - serum/glucocorticoid regulated kinase 1, Nlrc3 - nlr family, card domain containing 3, Adam9 - a disintegrin and metallopeptidase domain 9 (meltrin gamma), Plscr4 - phospholipid scramblase 4, Spp1 - secreted phosphoprotein 1, Klf9 - kruppel-like factor 9, Serpine1 - serine (or cysteine) peptidase inhibitor, clade e, member 1, Nr1d1 - nuclear receptor subfamily 1, group d, member 1, Ccr5 -…
GO:0043207	response to external biotic stimulus	0.000366	0.0343	1.8	11038	536	423	37	[Tnfsf8 - tumor necrosis factor (ligand) superfamily, member 8, Hyal2 - hyaluronoglucosaminidase 2, Itgav - integrin alpha v, Slc17a5 - solute carrier family 17 (anion/sugar transporter), member 5, Bmp2 - bone morphogenetic protein 2, Nlrc3 - nlr family, card domain containing 3, Adam9 - a disintegrin and metallopeptidase domain 9 (meltrin gamma), Plscr4 - phospholipid scramblase 4, Anxa3 - annex…
GO:1900046	regulation of hemostasis	0.000368	0.0342	4.44	11038	47	423	8	[Serpine1 - serine (or cysteine) peptidase inhibitor, clade e, member 1, Pros1 - protein s (alpha), F11r - f11 receptor, Hpse - heparanase, Pdgfb - platelet derived growth factor, b polypeptide, Pdpn - podoplanin, Enpp4 - ectonucleotide pyrophosphatase/phosphodiesterase 4, Cd9 - cd9 antigen]
GO:1903977	positive regulation of glial cell migration	0.000371	0.0343	10.44	11038	10	423	4	[Trem2 - triggering receptor expressed on myeloid cells 2, Lrp1 - low density lipoprotein receptor-related protein 1, P2ry12 - purinergic receptor p2y, g-protein coupled 12, Cx3cr1 - chemokine (c-x3-c) receptor 1]
GO:0031018	endocrine pancreas development	0.000371	0.0341	10.44	11038	10	423	4	[Pde3b - phosphodiesterase 3b, cgmp-inhibited, Sox4 - sry-box containing gene 4, Eif2ak3 - eukaryotic translation initiation factor 2 alpha kinase 3, Hes1 - hairy and enhancer of split 1 (drosophila)]
GO:0034138	toll-like receptor 3 signaling pathway	0.000371	0.0338	10.44	11038	10	423	4	[Colec12 - collectin sub-family member 12, Havcr2 - hepatitis a virus cellular receptor 2, Lgals9 - lectin, galactose binding, soluble 9, Rftn1 - raftlin lipid raft linker 1]
GO:0051896	regulation of protein kinase B signaling	0.000376	0.034	3	11038	113	423	13	[Tgfbr1 - transforming growth factor, beta receptor i, Hyal2 - hyaluronoglucosaminidase 2, Meis3 - meis homeobox 3, Hpse - heparanase, Gas6 - growth arrest specific 6, Tsc2 - tuberous sclerosis 2, Phlda3 - pleckstrin homology-like domain, family a, member 3, Fermt2 - fermitin family homolog 2 (drosophila), Sesn1 - sestrin 1, Prkcdbp - protein kinase c, delta binding protein, P2ry12 - purinergic r…
GO:0060326	cell chemotaxis	0.000383	0.0345	2.85	11038	128	423	14	[Hgf - hepatocyte growth factor, Plekhg5 - pleckstrin homology domain containing, family g (with rhogef domain) member 5, Ch25h - cholesterol 25-hydroxylase, Gpr183 - g protein-coupled receptor 183, Pdgfb - platelet derived growth factor, b polypeptide, Gas6 - growth arrest specific 6, Spp1 - secreted phosphoprotein 1, Ccr1l1 - chemokine (c-c motif) receptor 1-like 1, S1pr1 - sphingosine-1-phosph…
GO:0032868	response to insulin	0.000387	0.0346	3.16	11038	99	423	12	[Pde3b - phosphodiesterase 3b, cgmp-inhibited, Pik3r2 - phosphatidylinositol 3-kinase, regulatory subunit, polypeptide 2 (p85 beta), Uchl3 - ubiquitin carboxyl-terminal esterase l3 (ubiquitin thiolesterase), Cry2 - cryptochrome 2 (photolyase-like), Trpv4 - transient receptor potential cation channel, subfamily v, member 4, Enpp1 - ectonucleotide pyrophosphatase/phosphodiesterase 1, Slc27a1 - solu…
GO:0010975	regulation of neuron projection development	0.000412	0.0366	1.96	11038	386	423	29	[Hgf - hepatocyte growth factor, Itga6 - integrin alpha 6, Mob2 - mob kinase activator 2, Sgk1 - serum/glucocorticoid regulated kinase 1, Palm - paralemmin, Bag5 - bcl2-associated athanogene 5, Skil - ski-like, Plxna4 - plexin a4, Tsc2 - tuberous sclerosis 2, Ccr5 - chemokine (c-c motif) receptor 5, Cspg4 - chondroitin sulfate proteoglycan 4, Eef2k - eukaryotic elongation factor-2 kinase, D8Ertd8…
GO:0032501	multicellular organismal process	0.000468	0.0413	1.38	11038	1775	423	94	[S100b - s100 protein, beta polypeptide, neural, Itgav - integrin alpha v, Meis3 - meis homeobox 3, Ecm1 - extracellular matrix protein 1, Sgk1 - serum/glucocorticoid regulated kinase 1, Camk2d - calcium/calmodulin-dependent protein kinase ii, delta, Fam3c - family with sequence similarity 3, member c, Spp1 - secreted phosphoprotein 1, Pdlim7 - pdz and lim domain 7, B4galt1 - udp-gal:betaglcnac b…
GO:0070167	regulation of biomineral tissue development	0.000483	0.0424	3.85	11038	61	423	9	[Cd276 - cd276 antigen, Srgn - serglycin, Enpp1 - ectonucleotide pyrophosphatase/phosphodiesterase 1, Fam20c - family with sequence similarity 20, member c, P2rx7 - purinergic receptor p2x, ligand-gated ion channel, 7, Ecm1 - extracellular matrix protein 1, Bmp2 - bone morphogenetic protein 2, Gas6 - growth arrest specific 6, S1pr1 - sphingosine-1-phosphate receptor 1]
GO:0050790	regulation of catalytic activity	0.000493	0.043	1.47	11038	1260	423	71	[Hgf - hepatocyte growth factor, Itga6 - integrin alpha 6, Ppm1f - protein phosphatase 1f (pp2c domain containing), Tbc1d2 - tbc1 domain family, member 2, Ecm1 - extracellular matrix protein 1, Palm - paralemmin, Plxna4 - plexin a4, Atp2a3 - atpase, ca++ transporting, ubiquitous, S1pr1 - sphingosine-1-phosphate receptor 1, Ctsd - cathepsin d, Pik3r2 - phosphatidylinositol 3-kinase, regulatory sub…
GO:0050818	regulation of coagulation	0.000493	0.0427	4.26	11038	49	423	8	[Serpine1 - serine (or cysteine) peptidase inhibitor, clade e, member 1, Pros1 - protein s (alpha), F11r - f11 receptor, Hpse - heparanase, Pdgfb - platelet derived growth factor, b polypeptide, Pdpn - podoplanin, Enpp4 - ectonucleotide pyrophosphatase/phosphodiesterase 4, Cd9 - cd9 antigen]
GO:0009617	response to bacterium	0.000508	0.0437	2.34	11038	212	423	19	[Tnfsf8 - tumor necrosis factor (ligand) superfamily, member 8, Trem2 - triggering receptor expressed on myeloid cells 2, Slc17a5 - solute carrier family 17 (anion/sugar transporter), member 5, Bmp2 - bone morphogenetic protein 2, Anxa3 - annexin a3, Serpine1 - serine (or cysteine) peptidase inhibitor, clade e, member 1, Optn - optineurin, Fam20a - family with sequence similarity 20, member a, My…
GO:0043030	regulation of macrophage activation	0.00052	0.0445	4.81	11038	38	423	7	[Trem2 - triggering receptor expressed on myeloid cells 2, Nr1d1 - nuclear receptor subfamily 1, group d, member 1, Havcr2 - hepatitis a virus cellular receptor 2, Gpr137b - g protein-coupled receptor 137b, Nr1h3 - nuclear receptor subfamily 1, group h, member 3, Lgals9 - lectin, galactose binding, soluble 9, Grn - granulin]
GO:0002282	microglial cell activation involved in immune response	0.000528	0.0448	15.66	11038	5	423	3	[Trem2 - triggering receptor expressed on myeloid cells 2, Cx3cr1 - chemokine (c-x3-c) receptor 1, Grn - granulin]
GO:0044803	multi-organism membrane organization	0.000528	0.0446	15.66	11038	5	423	3	[Hyal2 - hyaluronoglucosaminidase 2, Gas6 - growth arrest specific 6, Fchsd2 - fch and double sh3 domains 2]
GO:1904141	positive regulation of microglial cell migration	0.000528	0.0443	15.66	11038	5	423	3	[Trem2 - triggering receptor expressed on myeloid cells 2, P2ry12 - purinergic receptor p2y, g-protein coupled 12, Cx3cr1 - chemokine (c-x3-c) receptor 1]
GO:0051128	regulation of cellular component organization	0.000535	0.0447	1.36	11038	1874	423	98	[Hgf - hepatocyte growth factor, Itga6 - integrin alpha 6, Itgav - integrin alpha v, Ppm1f - protein phosphatase 1f (pp2c domain containing), Sgk1 - serum/glucocorticoid regulated kinase 1, Plxna4 - plexin a4, Kank2 - kn motif and ankyrin repeat domains 2, Pik3r2 - phosphatidylinositol 3-kinase, regulatory subunit, polypeptide 2 (p85 beta), Spire1 - spire homolog 1 (drosophila), Sorbs3 - sorbin a…
GO:0045765	regulation of angiogenesis	0.000538	0.0446	2.33	11038	213	423	19	[Hgf - hepatocyte growth factor, Pde3b - phosphodiesterase 3b, cgmp-inhibited, Tgfbr2 - transforming growth factor, beta receptor ii, Sparc - secreted acidic cysteine rich glycoprotein, Ecm1 - extracellular matrix protein 1, Ets1 - e26 avian leukemia oncogene 1, 5' domain, Ecscr - endothelial cell surface expressed chemotaxis and apoptosis regulator, Anxa3 - annexin a3, Thbs2 - thrombospondin 2, …
GO:0030198	extracellular matrix organization	0.000546	0.045	2.64	11038	148	423	15	[Tgfbr1 - transforming growth factor, beta receptor i, Fn1 - fibronectin 1, Serpinh1 - serine (or cysteine) peptidase inhibitor, clade h, member 1, Fbln5 - fibulin 5, B4galt1 - udp-gal:betaglcnac beta 1,4- galactosyltransferase, polypeptide 1, Emilin1 - elastin microfibril interfacer 1, Lamb2 - laminin, beta 2, Adamtsl5 - adamts-like 5, Col14a1 - collagen, type xiv, alpha 1, Aplp1 - amyloid beta …
GO:1900424	regulation of defense response to bacterium	0.000566	0.0464	9.49	11038	11	423	4	[Rab34 - rab34, member of ras oncogene family, Havcr2 - hepatitis a virus cellular receptor 2, Lgals9 - lectin, galactose binding, soluble 9, Grn - granulin]
GO:0048519	negative regulation of biological process	0.00059	0.0481	1.24	11038	3437	423	163	[Vsig4 - v-set and immunoglobulin domain containing 4, Hgf - hepatocyte growth factor, Itga6 - integrin alpha 6, Itgav - integrin alpha v, Ppm1f - protein phosphatase 1f (pp2c domain containing), Sgk1 - serum/glucocorticoid regulated kinase 1, Cxxc5 - cxxc finger 5, Hpgds - hematopoietic prostaglandin d synthase, Ctla2a - cytotoxic t lymphocyte-associated protein 2 alpha, Plxna4 - plexin a4, Spp1…
GO:0065009	regulation of molecular function	0.000597	0.0484	1.38	11038	1696	423	90	[Hgf - hepatocyte growth factor, Itga6 - integrin alpha 6, Itgav - integrin alpha v, Ppm1f - protein phosphatase 1f (pp2c domain containing), Ecm1 - extracellular matrix protein 1, Tbc1d2 - tbc1 domain family, member 2, Camk2d - calcium/calmodulin-dependent protein kinase ii, delta, Palm - paralemmin, Plxna4 - plexin a4, Atp2a3 - atpase, ca++ transporting, ubiquitous, S1pr1 - sphingosine-1-phosph…
GO:0033688	regulation of osteoblast proliferation	0.000601	0.0484	6.87	11038	19	423	5	[Itgav - integrin alpha v, Bmp2 - bone morphogenetic protein 2, Hpse - heparanase, Bcl2 - b cell leukemia/lymphoma 2, Fbln5 - fibulin 5]
GO:0150077	regulation of neuroinflammatory response	0.000601	0.0481	6.87	11038	19	423	5	[Trem2 - triggering receptor expressed on myeloid cells 2, Nr1d1 - nuclear receptor subfamily 1, group d, member 1, Nupr1 - nuclear protein transcription regulator 1, Cd200r4 - cd200 receptor 4, Grn - granulin]
GO:0032689	negative regulation of interferon-gamma production	0.000601	0.0478	6.87	11038	19	423	5	[Cd276 - cd276 antigen, Havcr2 - hepatitis a virus cellular receptor 2, Gas6 - growth arrest specific 6, Prnp - prion protein, Lgals9 - lectin, galactose binding, soluble 9]
GO:0009725	response to hormone	0.000611	0.0483	2.11	11038	285	423	23	[Pde3b - phosphodiesterase 3b, cgmp-inhibited, Trpv4 - transient receptor potential cation channel, subfamily v, member 4, Zbed3 - zinc finger, bed domain containing 3, Timp2 - tissue inhibitor of metalloproteinase 2, Sgk1 - serum/glucocorticoid regulated kinase 1, Adam9 - a disintegrin and metallopeptidase domain 9 (meltrin gamma), Spp1 - secreted phosphoprotein 1, Grn - granulin, Tsc2 - tuberou…
GO:0045666	positive regulation of neuron differentiation	0.000641	0.0504	2.1	11038	286	423	23	[Fn1 - fibronectin 1, Hgf - hepatocyte growth factor, Itga6 - integrin alpha 6, Camk1 - calcium/calmodulin-dependent protein kinase i, Mob2 - mob kinase activator 2, Scn1b - sodium channel, voltage-gated, type i, beta, Bmp2 - bone morphogenetic protein 2, Timp2 - tissue inhibitor of metalloproteinase 2, Sgk1 - serum/glucocorticoid regulated kinase 1, Gdpd5 - glycerophosphodiester phosphodiesteras…
GO:1903036	positive regulation of response to wounding	0.000651	0.051	4.09	11038	51	423	8	[Serpine1 - serine (or cysteine) peptidase inhibitor, clade e, member 1, Fermt2 - fermitin family homolog 2 (drosophila), Lrp1 - low density lipoprotein receptor-related protein 1, F11r - f11 receptor, Hpse - heparanase, Pdpn - podoplanin, Enpp4 - ectonucleotide pyrophosphatase/phosphodiesterase 4, Grn - granulin]
GO:0035556	intracellular signal transduction	0.00069	0.0537	1.57	11038	863	423	52	[Rcan3 - regulator of calcineurin 3, Amotl1 - angiomotin-like 1, Itgav - integrin alpha v, Ppm1f - protein phosphatase 1f (pp2c domain containing), Sgk1 - serum/glucocorticoid regulated kinase 1, Atp2a3 - atpase, ca++ transporting, ubiquitous, Asb10 - ankyrin repeat and socs box-containing 10, S1pr1 - sphingosine-1-phosphate receptor 1, Calcrl - calcitonin receptor-like, Pik3r2 - phosphatidylinos…
GO:0001934	positive regulation of protein phosphorylation	0.000701	0.0542	1.7	11038	615	423	40	[Hgf - hepatocyte growth factor, Cdc25b - cell division cycle 25b, Bmp2 - bone morphogenetic protein 2, Mob2 - mob kinase activator 2, Timp2 - tissue inhibitor of metalloproteinase 2, Camk2d - calcium/calmodulin-dependent protein kinase ii, delta, Adam9 - a disintegrin and metallopeptidase domain 9 (meltrin gamma), Pdgfb - platelet derived growth factor, b polypeptide, Gas6 - growth arrest specif…
GO:0001818	negative regulation of cytokine production	0.000701	0.054	2.41	11038	184	423	17	[Vsig4 - v-set and immunoglobulin domain containing 4, Hgf - hepatocyte growth factor, Cd276 - cd276 antigen, Fn1 - fibronectin 1, Trem2 - triggering receptor expressed on myeloid cells 2, Nlrc3 - nlr family, card domain containing 3, Gas6 - growth arrest specific 6, Tnfrsf21 - tumor necrosis factor receptor superfamily, member 21, Mertk - c-mer proto-oncogene tyrosine kinase, Prnp - prion protei…
GO:0050865	regulation of cell activation	0.000704	0.0539	1.9	11038	399	423	29	[Vsig4 - v-set and immunoglobulin domain containing 4, Cd276 - cd276 antigen, Pdgfb - platelet derived growth factor, b polypeptide, Ctla2a - cytotoxic t lymphocyte-associated protein 2 alpha, Gas6 - growth arrest specific 6, Inpp5d - inositol polyphosphate-5-phosphatase d, Nr1d1 - nuclear receptor subfamily 1, group d, member 1, Sox4 - sry-box containing gene 4, Havcr2 - hepatitis a virus cellul…
GO:0009967	positive regulation of signal transduction	0.000725	0.0552	1.52	11038	993	423	58	[Hgf - hepatocyte growth factor, S100b - s100 protein, beta polypeptide, neural, Meis3 - meis homeobox 3, Camk2d - calcium/calmodulin-dependent protein kinase ii, delta, Tspan14 - tetraspanin 14, Sorbs3 - sorbin and sh3 domain containing 3, Gpr137b - g protein-coupled receptor 137b, Cspg4 - chondroitin sulfate proteoglycan 4, A630033H20Rik - riken cdna a630033h20 gene, Cx3cr1 - chemokine (c-x3-c)…
GO:0030500	regulation of bone mineralization	0.000744	0.0563	4.01	11038	52	423	8	[Cd276 - cd276 antigen, Srgn - serglycin, Enpp1 - ectonucleotide pyrophosphatase/phosphodiesterase 1, Fam20c - family with sequence similarity 20, member c, P2rx7 - purinergic receptor p2x, ligand-gated ion channel, 7, Ecm1 - extracellular matrix protein 1, Bmp2 - bone morphogenetic protein 2, S1pr1 - sphingosine-1-phosphate receptor 1]
GO:0009653	anatomical structure morphogenesis	0.000752	0.0566	1.58	11038	824	423	50	[Hgf - hepatocyte growth factor, Itga6 - integrin alpha 6, Nfic - nuclear factor i/c, Itgav - integrin alpha v, Meis3 - meis homeobox 3, Sgk1 - serum/glucocorticoid regulated kinase 1, Plxna4 - plexin a4, S1pr1 - sphingosine-1-phosphate receptor 1, B4galt1 - udp-gal:betaglcnac beta 1,4- galactosyltransferase, polypeptide 1, Lamb2 - laminin, beta 2, Bcl2 - b cell leukemia/lymphoma 2, Armc5 - armad…
GO:0050921	positive regulation of chemotaxis	0.000755	0.0565	3.12	11038	92	423	11	[Serpine1 - serine (or cysteine) peptidase inhibitor, clade e, member 1, Fn1 - fibronectin 1, Trem2 - triggering receptor expressed on myeloid cells 2, Trpv4 - transient receptor potential cation channel, subfamily v, member 4, Ppm1f - protein phosphatase 1f (pp2c domain containing), Cxcl14 - chemokine (c-x-c motif) ligand 14, Pdgfb - platelet derived growth factor, b polypeptide, Gas6 - growth a…
GO:0050920	regulation of chemotaxis	0.000764	0.0569	2.67	11038	137	423	14	[Fn1 - fibronectin 1, Trem2 - triggering receptor expressed on myeloid cells 2, Trpv4 - transient receptor potential cation channel, subfamily v, member 4, Ppm1f - protein phosphatase 1f (pp2c domain containing), Gpr183 - g protein-coupled receptor 183, Pdgfb - platelet derived growth factor, b polypeptide, Plxna4 - plexin a4, Gas6 - growth arrest specific 6, Ccr1l1 - chemokine (c-c motif) recept…
GO:0050820	positive regulation of coagulation	0.000776	0.0575	6.52	11038	20	423	5	[Serpine1 - serine (or cysteine) peptidase inhibitor, clade e, member 1, F11r - f11 receptor, Hpse - heparanase, Pdpn - podoplanin, Enpp4 - ectonucleotide pyrophosphatase/phosphodiesterase 4]
GO:0019722	calcium-mediated signaling	0.000779	0.0574	3.61	11038	65	423	9	[Rcan3 - regulator of calcineurin 3, Ccr5 - chemokine (c-c motif) receptor 5, Eif2ak3 - eukaryotic translation initiation factor 2 alpha kinase 3, Tmem38b - transmembrane protein 38b, P2ry12 - purinergic receptor p2y, g-protein coupled 12, Cx3cr1 - chemokine (c-x3-c) receptor 1, Ccr1l1 - chemokine (c-c motif) receptor 1-like 1, Prnp - prion protein, Rcan1 - regulator of calcineurin 1]
GO:0033690	positive regulation of osteoblast proliferation	0.000824	0.0604	8.7	11038	12	423	4	[Itgav - integrin alpha v, Bmp2 - bone morphogenetic protein 2, Hpse - heparanase, Fbln5 - fibulin 5]
GO:0060041	retina development in camera-type eye	0.000839	0.0612	4.46	11038	41	423	7	[Lamb2 - laminin, beta 2, Uchl3 - ubiquitin carboxyl-terminal esterase l3 (ubiquitin thiolesterase), Pdgfb - platelet derived growth factor, b polypeptide, Ski - ski sarcoma viral oncogene homolog (avian), Cfh - complement component factor h, Mertk - c-mer proto-oncogene tyrosine kinase, Grn - granulin]
GO:0009887	animal organ morphogenesis	0.000844	0.0612	2.02	11038	310	423	24	[Itga6 - integrin alpha 6, Tgfbr1 - transforming growth factor, beta receptor i, Tgfbr2 - transforming growth factor, beta receptor ii, Hyal2 - hyaluronoglucosaminidase 2, Nfic - nuclear factor i/c, Pdgfc - platelet-derived growth factor, c polypeptide, Itgav - integrin alpha v, Meis3 - meis homeobox 3, Bmp2 - bone morphogenetic protein 2, Ski - ski sarcoma viral oncogene homolog (avian), Tifab -…
GO:0050866	negative regulation of cell activation	0.000882	0.0636	2.63	11038	139	423	14	[Vsig4 - v-set and immunoglobulin domain containing 4, Cd276 - cd276 antigen, Pdgfb - platelet derived growth factor, b polypeptide, Tnfrsf21 - tumor necrosis factor receptor superfamily, member 21, Mertk - c-mer proto-oncogene tyrosine kinase, Prnp - prion protein, Grn - granulin, Inpp5d - inositol polyphosphate-5-phosphatase d, Emilin1 - elastin microfibril interfacer 1, Nr1d1 - nuclear recepto…
GO:0048041	focal adhesion assembly	0.000987	0.0709	6.21	11038	21	423	5	[Fermt2 - fermitin family homolog 2 (drosophila), Itgav - integrin alpha v, Thsd1 - thrombospondin, type i, domain 1, Bcl2 - b cell leukemia/lymphoma 2, Actn1 - actinin, alpha 1]
GO:0007045	cell-substrate adherens junction assembly	0.000987	0.0705	6.21	11038	21	423	5	[Fermt2 - fermitin family homolog 2 (drosophila), Itgav - integrin alpha v, Thsd1 - thrombospondin, type i, domain 1, Bcl2 - b cell leukemia/lymphoma 2, Actn1 - actinin, alpha 1]
GO:0002275	myeloid cell activation involved in immune response	0.000996	0.0707	5.05	11038	31	423	6	[Trem2 - triggering receptor expressed on myeloid cells 2, Myo1f - myosin if, Havcr2 - hepatitis a virus cellular receptor 2, Anxa3 - annexin a3, Cx3cr1 - chemokine (c-x3-c) receptor 1, Grn - granulin]

## Sheet: 4 Gorilla v expressed
GO Term	Description	P-value	FDR q-value	Enrichment	N	B	n	b	Genes
GO:0002376	immune system process	9.97e-34	1.38e-29	3.27	11038	1003	404	120	[Tnfsf9 - tumor necrosis factor (ligand) superfamily, member 9, Trim25 - tripartite motif-containing 25, Slamf7 - slam family member 7, Itgal - integrin alpha l, Itgax - integrin alpha x, Mefv - mediterranean fever, Clec2i - c-type lectin domain family 2, member i, Itgb7 - integrin beta 7, Ctsh - cathepsin h, Arg1 - arginase, liver, Slc15a3 - solute carrier family 15, member 3, Cd74 - cd74 antige…
GO:0002682	regulation of immune system process	3.54e-32	2.45e-28	3.34	11038	915	404	112	[Tnfsf9 - tumor necrosis factor (ligand) superfamily, member 9, Lmo1 - lim domain only 1, Slamf7 - slam family member 7, Itgal - integrin alpha l, Samsn1 - sam domain, sh3 domain and nuclear localization signals, 1, Clec2i - c-type lectin domain family 2, member i, Ctsh - cathepsin h, Pim1 - proviral integration site 1, Arg1 - arginase, liver, Gpnmb - glycoprotein (transmembrane) nmb, Socs1 - sup…
GO:0002694	regulation of leukocyte activation	3.53e-27	1.63e-23	4.81	11038	369	404	65	[Tnfsf9 - tumor necrosis factor (ligand) superfamily, member 9, Slfn1 - schlafen 1, Lmo1 - lim domain only 1, Samsn1 - sam domain, sh3 domain and nuclear localization signals, 1, Slamf7 - slam family member 7, Itgal - integrin alpha l, Axl - axl receptor tyrosine kinase, H2-DMa - histocompatibility 2, class ii, locus dma, Ahr - aryl-hydrocarbon receptor, Aif1 - allograft inflammatory factor 1, Sd…
GO:0050865	regulation of cell activation	9.53e-27	3.3e-23	4.59	11038	399	404	67	[Tnfsf9 - tumor necrosis factor (ligand) superfamily, member 9, Slfn1 - schlafen 1, Lmo1 - lim domain only 1, Slamf7 - slam family member 7, Samsn1 - sam domain, sh3 domain and nuclear localization signals, 1, Itgal - integrin alpha l, Axl - axl receptor tyrosine kinase, H2-DMa - histocompatibility 2, class ii, locus dma, Ahr - aryl-hydrocarbon receptor, Aif1 - allograft inflammatory factor 1, Sd…
GO:0002684	positive regulation of immune system process	1.01e-24	2.79e-21	3.61	11038	606	404	80	[Tnfsf9 - tumor necrosis factor (ligand) superfamily, member 9, Itgal - integrin alpha l, Axl - axl receptor tyrosine kinase, H2-DMa - histocompatibility 2, class ii, locus dma, Niacr1 - niacin receptor 1, Nfkbia - nuclear factor of kappa light polypeptide gene enhancer in b cells inhibitor, alpha, Aif1 - allograft inflammatory factor 1, Clec2i - c-type lectin domain family 2, member i, Cd14 - cd…
GO:0051249	regulation of lymphocyte activation	2.26e-24	5.22e-21	5.02	11038	305	404	56	[Tnfsf9 - tumor necrosis factor (ligand) superfamily, member 9, Slfn1 - schlafen 1, Lmo1 - lim domain only 1, Samsn1 - sam domain, sh3 domain and nuclear localization signals, 1, Slamf7 - slam family member 7, Itgal - integrin alpha l, Axl - axl receptor tyrosine kinase, H2-DMa - histocompatibility 2, class ii, locus dma, Ahr - aryl-hydrocarbon receptor, Aif1 - allograft inflammatory factor 1, Sd…
GO:0006955	immune response	2.04e-23	4.04e-20	3.78	11038	521	404	72	[Tnfsf9 - tumor necrosis factor (ligand) superfamily, member 9, Trim25 - tripartite motif-containing 25, Slamf7 - slam family member 7, Axl - axl receptor tyrosine kinase, Nfil3 - nuclear factor, interleukin 3, regulated, H2-DMa - histocompatibility 2, class ii, locus dma, H2-DMb1 - histocompatibility 2, class ii, locus mb1, Mefv - mediterranean fever, Cd14 - cd14 antigen, H2-Q7 - histocompatibil…
GO:0006952	defense response	8.19e-23	1.42e-19	3.41	11038	633	404	79	[Trim25 - tripartite motif-containing 25, Slamf7 - slam family member 7, Ltb4r1 - leukotriene b4 receptor 1, Axl - axl receptor tyrosine kinase, Gbp9 - guanylate-binding protein 9, Itgax - integrin alpha x, Mefv - mediterranean fever, Sdc1 - syndecan 1, Batf - basic leucine zipper transcription factor, atf-like, Cd14 - cd14 antigen, Pld4 - phospholipase d family, member 4, Il1rl2 - interleukin 1 …
GO:0043207	response to external biotic stimulus	5.43e-22	8.36e-19	3.62	11038	536	404	71	[Trim25 - tripartite motif-containing 25, Axl - axl receptor tyrosine kinase, Gbp9 - guanylate-binding protein 9, Itgax - integrin alpha x, Nfkbia - nuclear factor of kappa light polypeptide gene enhancer in b cells inhibitor, alpha, Nfkbib - nuclear factor of kappa light polypeptide gene enhancer in b cells inhibitor, beta, AA467197 - expressed sequence aa467197, Batf - basic leucine zipper tran…
GO:0009607	response to biotic stimulus	1.03e-21	1.42e-18	3.54	11038	556	404	72	[Trim25 - tripartite motif-containing 25, Axl - axl receptor tyrosine kinase, Gbp9 - guanylate-binding protein 9, Itgax - integrin alpha x, Nfkbia - nuclear factor of kappa light polypeptide gene enhancer in b cells inhibitor, alpha, Nfkbib - nuclear factor of kappa light polypeptide gene enhancer in b cells inhibitor, beta, AA467197 - expressed sequence aa467197, Batf - basic leucine zipper tran…
GO:0050867	positive regulation of cell activation	1.07e-21	1.35e-18	5.33	11038	241	404	47	[Rasgrp1 - ras guanyl releasing protein 1, Tnfsf9 - tumor necrosis factor (ligand) superfamily, member 9, Itgal - integrin alpha l, Clec7a - c-type lectin domain family 7, member a, Axl - axl receptor tyrosine kinase, Ccdc88b - coiled-coil domain containing 88b, H2-DMa - histocompatibility 2, class ii, locus dma, Il2rg - interleukin 2 receptor, gamma chain, Adam8 - a disintegrin and metallopeptid…
GO:1903037	regulation of leukocyte cell-cell adhesion	4.88e-21	5.64e-18	5.68	11038	207	404	43	[Rasgrp1 - ras guanyl releasing protein 1, Tnfsf9 - tumor necrosis factor (ligand) superfamily, member 9, Slfn1 - schlafen 1, Itgal - integrin alpha l, Ccdc88b - coiled-coil domain containing 88b, H2-DMa - histocompatibility 2, class ii, locus dma, Adam8 - a disintegrin and metallopeptidase domain 8, Il2rg - interleukin 2 receptor, gamma chain, Icam1 - intercellular adhesion molecule 1, Aif1 - al…
GO:0002696	positive regulation of leukocyte activation	5.01e-21	5.34e-18	5.39	11038	228	404	45	[Rasgrp1 - ras guanyl releasing protein 1, Tnfsf9 - tumor necrosis factor (ligand) superfamily, member 9, Itgal - integrin alpha l, Clec7a - c-type lectin domain family 7, member a, Axl - axl receptor tyrosine kinase, Ccdc88b - coiled-coil domain containing 88b, H2-DMa - histocompatibility 2, class ii, locus dma, Il2rg - interleukin 2 receptor, gamma chain, Adam8 - a disintegrin and metallopeptid…
GO:0050863	regulation of T cell activation	1.07e-20	1.06e-17	5.57	11038	211	404	43	[Rasgrp1 - ras guanyl releasing protein 1, Tnfsf9 - tumor necrosis factor (ligand) superfamily, member 9, Slfn1 - schlafen 1, Lmo1 - lim domain only 1, Itgal - integrin alpha l, Ccdc88b - coiled-coil domain containing 88b, H2-DMa - histocompatibility 2, class ii, locus dma, Il2rg - interleukin 2 receptor, gamma chain, Adam8 - a disintegrin and metallopeptidase domain 8, Cd209a - cd209a antigen, A…
GO:0006954	inflammatory response	1.29e-20	1.19e-17	5.15	11038	244	404	46	[Rasgrp1 - ras guanyl releasing protein 1, Il1rn - interleukin 1 receptor antagonist, Ltb4r1 - leukotriene b4 receptor 1, Ccrl2 - chemokine (c-c motif) receptor-like 2, Axl - axl receptor tyrosine kinase, Ccl6 - chemokine (c-c motif) ligand 6, Mefv - mediterranean fever, Adam8 - a disintegrin and metallopeptidase domain 8, Nlrp10 - nlr family, pyrin domain containing 10, Ccl9 - chemokine (c-c mot…
GO:0022407	regulation of cell-cell adhesion	2.78e-20	2.41e-17	4.84	11038	271	404	48	[Rasgrp1 - ras guanyl releasing protein 1, Tnfsf9 - tumor necrosis factor (ligand) superfamily, member 9, Slfn1 - schlafen 1, Il1rn - interleukin 1 receptor antagonist, Itgal - integrin alpha l, Ccdc88b - coiled-coil domain containing 88b, H2-DMa - histocompatibility 2, class ii, locus dma, Adam8 - a disintegrin and metallopeptidase domain 8, Il2rg - interleukin 2 receptor, gamma chain, Icam1 - i…
GO:0001817	regulation of cytokine production	5.56e-20	4.53e-17	3.59	11038	494	404	65	[Tnfsf9 - tumor necrosis factor (ligand) superfamily, member 9, Axl - axl receptor tyrosine kinase, Mefv - mediterranean fever, Aif1 - allograft inflammatory factor 1, Clec2i - c-type lectin domain family 2, member i, Cd14 - cd14 antigen, Pld4 - phospholipase d family, member 4, Il1rl2 - interleukin 1 receptor-like 2, Cd2 - cd2 antigen, Cd24a - cd24a antigen, Arg1 - arginase, liver, Il1rl1 - inte…
GO:1903039	positive regulation of leukocyte cell-cell adhesion	2.49e-19	1.92e-16	6.51	11038	147	404	35	[Rasgrp1 - ras guanyl releasing protein 1, Tnfsf9 - tumor necrosis factor (ligand) superfamily, member 9, Itgal - integrin alpha l, Ccdc88b - coiled-coil domain containing 88b, H2-DMa - histocompatibility 2, class ii, locus dma, Il2rg - interleukin 2 receptor, gamma chain, Adam8 - a disintegrin and metallopeptidase domain 8, Icam1 - intercellular adhesion molecule 1, Aif1 - allograft inflammatory…
GO:0022409	positive regulation of cell-cell adhesion	2.52e-18	1.84e-15	5.89	11038	167	404	36	[Rasgrp1 - ras guanyl releasing protein 1, Tnfsf9 - tumor necrosis factor (ligand) superfamily, member 9, Itgal - integrin alpha l, Ccdc88b - coiled-coil domain containing 88b, H2-DMa - histocompatibility 2, class ii, locus dma, Il2rg - interleukin 2 receptor, gamma chain, Adam8 - a disintegrin and metallopeptidase domain 8, Icam1 - intercellular adhesion molecule 1, Aif1 - allograft inflammatory…
GO:0050776	regulation of immune response	7.28e-18	5.04e-15	3.32	11038	527	404	64	[Samsn1 - sam domain, sh3 domain and nuclear localization signals, 1, H2-DMa - histocompatibility 2, class ii, locus dma, Nfkbia - nuclear factor of kappa light polypeptide gene enhancer in b cells inhibitor, alpha, Clec2i - c-type lectin domain family 2, member i, Cd14 - cd14 antigen, H2-Q7 - histocompatibility 2, q region locus 7, Ctsh - cathepsin h, Cd24a - cd24a antigen, Arg1 - arginase, live…
GO:0009605	response to external stimulus	1.42e-17	9.38e-15	2.71	11038	836	404	83	[Trim25 - tripartite motif-containing 25, Nr4a2 - nuclear receptor subfamily 4, group a, member 2, Axl - axl receptor tyrosine kinase, Gbp9 - guanylate-binding protein 9, Itgax - integrin alpha x, Nfkbia - nuclear factor of kappa light polypeptide gene enhancer in b cells inhibitor, alpha, Nfkbib - nuclear factor of kappa light polypeptide gene enhancer in b cells inhibitor, beta, AA467197 - expr…
GO:0051251	positive regulation of lymphocyte activation	6.16e-17	3.88e-14	5.21	11038	194	404	37	[Rasgrp1 - ras guanyl releasing protein 1, Tnfsf9 - tumor necrosis factor (ligand) superfamily, member 9, Itgal - integrin alpha l, Clec7a - c-type lectin domain family 7, member a, Axl - axl receptor tyrosine kinase, Ccdc88b - coiled-coil domain containing 88b, H2-DMa - histocompatibility 2, class ii, locus dma, Il2rg - interleukin 2 receptor, gamma chain, Adam8 - a disintegrin and metallopeptid…
GO:0050870	positive regulation of T cell activation	2.53e-16	1.53e-13	6.31	11038	130	404	30	[Rasgrp1 - ras guanyl releasing protein 1, Tnfsf9 - tumor necrosis factor (ligand) superfamily, member 9, Itgal - integrin alpha l, Ccdc88b - coiled-coil domain containing 88b, H2-DMa - histocompatibility 2, class ii, locus dma, Il2rg - interleukin 2 receptor, gamma chain, Adam8 - a disintegrin and metallopeptidase domain 8, Aif1 - allograft inflammatory factor 1, Il6 - interleukin 6, Ccr2 - chem…
GO:0007165	signal transduction	4.38e-16	2.53e-13	1.93	11038	1956	404	138	[Itgal - integrin alpha l, Itgax - integrin alpha x, Stmn1 - stathmin 1, Rhov - ras homolog gene family, member v, Clec2i - c-type lectin domain family 2, member i, Cdc42ep2 - cdc42 effector protein (rho gtpase binding) 2, Itgb7 - integrin beta 7, Ctsh - cathepsin h, Chn2 - chimerin (chimaerin) 2, Areg - amphiregulin, Pim1 - proviral integration site 1, Ndnf - neuron-derived neurotrophic factor, …
GO:0051707	response to other organism	6.56e-16	3.63e-13	3.51	11038	413	404	53	[Trim25 - tripartite motif-containing 25, Gbp9 - guanylate-binding protein 9, Itgax - integrin alpha x, AA467197 - expressed sequence aa467197, Batf - basic leucine zipper transcription factor, atf-like, Cd14 - cd14 antigen, Rpl39 - ribosomal protein l39, Arg1 - arginase, liver, Hsp90aa1 - heat shock protein 90, alpha (cytosolic), class a member 1, Irf7 - interferon regulatory factor 7, Bcl3 - b …
GO:0002683	negative regulation of immune system process	1.23e-15	6.53e-13	3.89	11038	323	404	46	[Slfn1 - schlafen 1, Samsn1 - sam domain, sh3 domain and nuclear localization signals, 1, Axl - axl receptor tyrosine kinase, Hist1h4d - histone cluster 1, h4d, Nfkbia - nuclear factor of kappa light polypeptide gene enhancer in b cells inhibitor, alpha, Dusp1 - dual specificity phosphatase 1, Sdc4 - syndecan 4, Tmem176a - transmembrane protein 176a, Id2 - inhibitor of dna binding 2, Clec2i - c-t…
GO:0030155	regulation of cell adhesion	1.33e-15	6.81e-13	3.26	11038	478	404	57	[Tnfsf9 - tumor necrosis factor (ligand) superfamily, member 9, Slfn1 - schlafen 1, Itgal - integrin alpha l, H2-DMa - histocompatibility 2, class ii, locus dma, Aif1 - allograft inflammatory factor 1, Sdc4 - syndecan 4, Il1rl2 - interleukin 1 receptor-like 2, Ndnf - neuron-derived neurotrophic factor, Cd24a - cd24a antigen, Arg1 - arginase, liver, Hsp90aa1 - heat shock protein 90, alpha (cytosol…
GO:0050670	regulation of lymphocyte proliferation	1.4e-15	6.93e-13	5.53	11038	158	404	32	[Tnfsf9 - tumor necrosis factor (ligand) superfamily, member 9, Slfn1 - schlafen 1, Lmo1 - lim domain only 1, Itgal - integrin alpha l, Ccdc88b - coiled-coil domain containing 88b, Cd209a - cd209a antigen, Ahr - aryl-hydrocarbon receptor, Aif1 - allograft inflammatory factor 1, Sdc4 - syndecan 4, Clec2i - c-type lectin domain family 2, member i, Il6 - interleukin 6, Ccr2 - chemokine (c-c motif) r…
GO:0032944	regulation of mononuclear cell proliferation	2.05e-15	9.79e-13	5.46	11038	160	404	32	[Tnfsf9 - tumor necrosis factor (ligand) superfamily, member 9, Slfn1 - schlafen 1, Lmo1 - lim domain only 1, Itgal - integrin alpha l, Ccdc88b - coiled-coil domain containing 88b, Cd209a - cd209a antigen, Ahr - aryl-hydrocarbon receptor, Aif1 - allograft inflammatory factor 1, Sdc4 - syndecan 4, Clec2i - c-type lectin domain family 2, member i, Il6 - interleukin 6, Ccr2 - chemokine (c-c motif) r…
GO:0050896	response to stimulus	2.47e-15	1.14e-12	1.67	11038	2944	404	180	[Trim25 - tripartite motif-containing 25, Tnfsf9 - tumor necrosis factor (ligand) superfamily, member 9, Mcm5 - minichromosome maintenance deficient 5, cell division cycle 46 (s. cerevisiae), Slamf7 - slam family member 7, Nr4a2 - nuclear receptor subfamily 4, group a, member 2, Itgax - integrin alpha x, Mefv - mediterranean fever, AA467197 - expressed sequence aa467197, Cdc42ep2 - cdc42 effector…
GO:0071216	cellular response to biotic stimulus	4.08e-15	1.82e-12	5.73	11038	143	404	30	[Pde4b - phosphodiesterase 4b, camp specific, Clec7a - c-type lectin domain family 7, member a, Axl - axl receptor tyrosine kinase, Nfkbia - nuclear factor of kappa light polypeptide gene enhancer in b cells inhibitor, alpha, Nfkbib - nuclear factor of kappa light polypeptide gene enhancer in b cells inhibitor, beta, Cxcl2 - chemokine (c-x-c motif) ligand 2, Il6 - interleukin 6, Cd14 - cd14 antig…
GO:0001819	positive regulation of cytokine production	4.14e-15	1.79e-12	3.84	11038	320	404	45	[Rasgrp1 - ras guanyl releasing protein 1, Tnfsf9 - tumor necrosis factor (ligand) superfamily, member 9, Pde4b - phosphodiesterase 4b, camp specific, Clec7a - c-type lectin domain family 7, member a, Ccdc88b - coiled-coil domain containing 88b, Nlrp10 - nlr family, pyrin domain containing 10, Adam8 - a disintegrin and metallopeptidase domain 8, Aif1 - allograft inflammatory factor 1, Il6 - inter…
GO:0045619	regulation of lymphocyte differentiation	1.12e-14	4.7e-12	5.98	11038	128	404	28	[Rasgrp1 - ras guanyl releasing protein 1, Tnfsf9 - tumor necrosis factor (ligand) superfamily, member 9, Axl - axl receptor tyrosine kinase, H2-DMa - histocompatibility 2, class ii, locus dma, Il2rg - interleukin 2 receptor, gamma chain, Adam8 - a disintegrin and metallopeptidase domain 8, Id2 - inhibitor of dna binding 2, Il6 - interleukin 6, Ccr2 - chemokine (c-c motif) receptor 2, Il1rl2 - in…
GO:0070663	regulation of leukocyte proliferation	1.26e-14	5.12e-12	5.14	11038	170	404	32	[Tnfsf9 - tumor necrosis factor (ligand) superfamily, member 9, Slfn1 - schlafen 1, Lmo1 - lim domain only 1, Itgal - integrin alpha l, Ccdc88b - coiled-coil domain containing 88b, Cd209a - cd209a antigen, Ahr - aryl-hydrocarbon receptor, Aif1 - allograft inflammatory factor 1, Sdc4 - syndecan 4, Clec2i - c-type lectin domain family 2, member i, Il6 - interleukin 6, Ccr2 - chemokine (c-c motif) r…
GO:0045785	positive regulation of cell adhesion	2.99e-14	1.18e-11	3.86	11038	297	404	42	[Rasgrp1 - ras guanyl releasing protein 1, Tnfsf9 - tumor necrosis factor (ligand) superfamily, member 9, Itgal - integrin alpha l, Ccdc88b - coiled-coil domain containing 88b, H2-DMa - histocompatibility 2, class ii, locus dma, Ibsp - integrin binding sialoprotein, Il2rg - interleukin 2 receptor, gamma chain, Adam8 - a disintegrin and metallopeptidase domain 8, Icam1 - intercellular adhesion mol…
GO:0045621	positive regulation of lymphocyte differentiation	4.08e-14	1.57e-11	7.61	11038	79	404	22	[Rasgrp1 - ras guanyl releasing protein 1, Tnfsf9 - tumor necrosis factor (ligand) superfamily, member 9, Socs1 - suppressor of cytokine signaling 1, Axl - axl receptor tyrosine kinase, H2-DMa - histocompatibility 2, class ii, locus dma, Nfkbid - nuclear factor of kappa light polypeptide gene enhancer in b cells inhibitor, delta, Cd74 - cd74 antigen (invariant polypeptide of major histocompatibil…
GO:0001775	cell activation	5.5e-14	2.06e-11	3.46	11038	371	404	47	[Rasgrp1 - ras guanyl releasing protein 1, Tnfsf9 - tumor necrosis factor (ligand) superfamily, member 9, Batf3 - basic leucine zipper transcription factor, atf-like 3, Itgal - integrin alpha l, Axl - axl receptor tyrosine kinase, Zbtb32 - zinc finger and btb domain containing 32, Timp1 - tissue inhibitor of metalloproteinase 1, Ahr - aryl-hydrocarbon receptor, Icam1 - intercellular adhesion mole…
GO:0045321	leukocyte activation	8.33e-14	3.04e-11	3.61	11038	333	404	44	[Rasgrp1 - ras guanyl releasing protein 1, Tnfsf9 - tumor necrosis factor (ligand) superfamily, member 9, Batf3 - basic leucine zipper transcription factor, atf-like 3, Itgal - integrin alpha l, Axl - axl receptor tyrosine kinase, Zbtb32 - zinc finger and btb domain containing 32, Ahr - aryl-hydrocarbon receptor, Icam1 - intercellular adhesion molecule 1, Cxcr4 - chemokine (c-x-c motif) receptor …
GO:1902105	regulation of leukocyte differentiation	8.96e-14	3.18e-11	4.53	11038	205	404	34	[Rasgrp1 - ras guanyl releasing protein 1, Tnfsf9 - tumor necrosis factor (ligand) superfamily, member 9, Axl - axl receptor tyrosine kinase, H2-DMa - histocompatibility 2, class ii, locus dma, Adam8 - a disintegrin and metallopeptidase domain 8, Il2rg - interleukin 2 receptor, gamma chain, Tmem176a - transmembrane protein 176a, Id2 - inhibitor of dna binding 2, Clec2i - c-type lectin domain fami…
GO:0042129	regulation of T cell proliferation	1.06e-13	3.66e-11	5.97	11038	119	404	26	[Tnfsf9 - tumor necrosis factor (ligand) superfamily, member 9, Slfn1 - schlafen 1, Lmo1 - lim domain only 1, Itgal - integrin alpha l, Ccdc88b - coiled-coil domain containing 88b, Cd209a - cd209a antigen, Aif1 - allograft inflammatory factor 1, Sdc4 - syndecan 4, Clec2i - c-type lectin domain family 2, member i, Il6 - interleukin 6, Ccr2 - chemokine (c-c motif) receptor 2, Cd24a - cd24a antigen,…
GO:0002237	response to molecule of bacterial origin	1.27e-13	4.3e-11	4.75	11038	184	404	32	[Pde4b - phosphodiesterase 4b, camp specific, Axl - axl receptor tyrosine kinase, Nfkbia - nuclear factor of kappa light polypeptide gene enhancer in b cells inhibitor, alpha, Nfkbib - nuclear factor of kappa light polypeptide gene enhancer in b cells inhibitor, beta, Cxcl2 - chemokine (c-x-c motif) ligand 2, Il6 - interleukin 6, Cd14 - cd14 antigen, Nlrp3 - nlr family, pyrin domain containing 3,…
GO:1903706	regulation of hemopoiesis	1.3e-13	4.29e-11	3.86	11038	283	404	40	[Rasgrp1 - ras guanyl releasing protein 1, Tnfsf9 - tumor necrosis factor (ligand) superfamily, member 9, Axl - axl receptor tyrosine kinase, H2-DMa - histocompatibility 2, class ii, locus dma, Il2rg - interleukin 2 receptor, gamma chain, Adam8 - a disintegrin and metallopeptidase domain 8, Hist1h4d - histone cluster 1, h4d, Nfkbia - nuclear factor of kappa light polypeptide gene enhancer in b ce…
GO:0071219	cellular response to molecule of bacterial origin	1.3e-13	4.2e-11	5.92	11038	120	404	26	[Pde4b - phosphodiesterase 4b, camp specific, Axl - axl receptor tyrosine kinase, Nfkbib - nuclear factor of kappa light polypeptide gene enhancer in b cells inhibitor, beta, Cxcl2 - chemokine (c-x-c motif) ligand 2, Il6 - interleukin 6, Cd14 - cd14 antigen, Nlrp3 - nlr family, pyrin domain containing 3, Tnip3 - tnfaip3 interacting protein 3, Tlr1 - toll-like receptor 1, Cxcl10 - chemokine (c-x-c…
GO:0071222	cellular response to lipopolysaccharide	1.52e-13	4.79e-11	6.15	11038	111	404	25	[Pde4b - phosphodiesterase 4b, camp specific, Axl - axl receptor tyrosine kinase, Nfkbib - nuclear factor of kappa light polypeptide gene enhancer in b cells inhibitor, beta, Cxcl2 - chemokine (c-x-c motif) ligand 2, Il6 - interleukin 6, Cd14 - cd14 antigen, Nlrp3 - nlr family, pyrin domain containing 3, Tnip3 - tnfaip3 interacting protein 3, Cxcl10 - chemokine (c-x-c motif) ligand 10, Ticam1 - t…
GO:0031347	regulation of defense response	1.76e-13	5.43e-11	3.07	11038	472	404	53	[Mefv - mediterranean fever, Nfkbia - nuclear factor of kappa light polypeptide gene enhancer in b cells inhibitor, alpha, Cd14 - cd14 antigen, Pld4 - phospholipase d family, member 4, Il1rl2 - interleukin 1 receptor-like 2, Cd24a - cd24a antigen, Arg1 - arginase, liver, Il1rl1 - interleukin 1 receptor-like 1, Hsp90aa1 - heat shock protein 90, alpha (cytosolic), class a member 1, Socs3 - suppress…
GO:0051239	regulation of multicellular organismal process	1.89e-13	5.68e-11	1.84	11038	1930	404	130	[Tnfsf9 - tumor necrosis factor (ligand) superfamily, member 9, Nr4a2 - nuclear receptor subfamily 4, group a, member 2, Chad - chondroadherin, Itgax - integrin alpha x, Mefv - mediterranean fever, Clec2i - c-type lectin domain family 2, member i, Ctsh - cathepsin h, Areg - amphiregulin, Pim1 - proviral integration site 1, Ndnf - neuron-derived neurotrophic factor, Arg1 - arginase, liver, Gpnmb -…
GO:0050778	positive regulation of immune response	3.11e-13	9.15e-11	3.36	11038	374	404	46	[Rasgrp1 - ras guanyl releasing protein 1, Zbp1 - z-dna binding protein 1, Pde4b - phosphodiesterase 4b, camp specific, H2-Q6 - histocompatibility 2, q region locus 6, H2-DMa - histocompatibility 2, class ii, locus dma, Nlrp10 - nlr family, pyrin domain containing 10, Adam8 - a disintegrin and metallopeptidase domain 8, Nfkbia - nuclear factor of kappa light polypeptide gene enhancer in b cells i…
GO:0032496	response to lipopolysaccharide	3.72e-13	1.07e-10	4.88	11038	168	404	30	[Pde4b - phosphodiesterase 4b, camp specific, Axl - axl receptor tyrosine kinase, Nfkbia - nuclear factor of kappa light polypeptide gene enhancer in b cells inhibitor, alpha, Nfkbib - nuclear factor of kappa light polypeptide gene enhancer in b cells inhibitor, beta, Cxcl2 - chemokine (c-x-c motif) ligand 2, Il6 - interleukin 6, Cd14 - cd14 antigen, Nlrp3 - nlr family, pyrin domain containing 3,…
GO:0050900	leukocyte migration	4.4e-13	1.24e-10	5.64	11038	126	404	26	[Pde4b - phosphodiesterase 4b, camp specific, Itgal - integrin alpha l, Ccl6 - chemokine (c-c motif) ligand 6, Adam8 - a disintegrin and metallopeptidase domain 8, Ccl9 - chemokine (c-c motif) ligand 9, Itga1 - integrin alpha 1, Icam1 - intercellular adhesion molecule 1, Cxcl2 - chemokine (c-x-c motif) ligand 2, Trem1 - triggering receptor expressed on myeloid cells 1, Itgb7 - integrin beta 7, Rp…
GO:1902107	positive regulation of leukocyte differentiation	6.69e-13	1.85e-10	5.79	11038	118	404	25	[Rasgrp1 - ras guanyl releasing protein 1, Tnfsf9 - tumor necrosis factor (ligand) superfamily, member 9, Axl - axl receptor tyrosine kinase, H2-DMa - histocompatibility 2, class ii, locus dma, Il2rg - interleukin 2 receptor, gamma chain, Adam8 - a disintegrin and metallopeptidase domain 8, Id2 - inhibitor of dna binding 2, Il6 - interleukin 6, Ccr2 - chemokine (c-c motif) receptor 2, Il1rl2 - in…
GO:0051240	positive regulation of multicellular organismal process	9.07e-13	2.46e-10	2.13	11038	1165	404	91	[Tnfsf9 - tumor necrosis factor (ligand) superfamily, member 9, Axl - axl receptor tyrosine kinase, H2-DMa - histocompatibility 2, class ii, locus dma, Itgax - integrin alpha x, Niacr1 - niacin receptor 1, Fabp5 - fatty acid binding protein 5, epidermal, Aif1 - allograft inflammatory factor 1, Cd14 - cd14 antigen, Il1rl2 - interleukin 1 receptor-like 2, Ctsh - cathepsin h, Pim1 - proviral integra…
GO:0051704	multi-organism process	1.08e-12	2.87e-10	2.7	11038	607	404	60	[Trim25 - tripartite motif-containing 25, Axl - axl receptor tyrosine kinase, Gbp9 - guanylate-binding protein 9, Itgax - integrin alpha x, AA467197 - expressed sequence aa467197, Batf - basic leucine zipper transcription factor, atf-like, Cd14 - cd14 antigen, Rpl39 - ribosomal protein l39, Arg1 - arginase, liver, Hsp90aa1 - heat shock protein 90, alpha (cytosolic), class a member 1, Irf7 - inter…
GO:0045582	positive regulation of T cell differentiation	1.19e-12	3.11e-10	7.87	11038	66	404	19	[Rasgrp1 - ras guanyl releasing protein 1, Tnfsf9 - tumor necrosis factor (ligand) superfamily, member 9, Socs1 - suppressor of cytokine signaling 1, H2-DMa - histocompatibility 2, class ii, locus dma, Nfkbid - nuclear factor of kappa light polypeptide gene enhancer in b cells inhibitor, delta, Cd74 - cd74 antigen (invariant polypeptide of major histocompatibility complex, class ii antigen-associ…
GO:0048584	positive regulation of response to stimulus	1.47e-12	3.77e-10	2.01	11038	1373	404	101	[Trim25 - tripartite motif-containing 25, Avpi1 - arginine vasopressin-induced 1, Itgal - integrin alpha l, Clec2i - c-type lectin domain family 2, member i, Ctsh - cathepsin h, Areg - amphiregulin, Gadd45b - growth arrest and dna-damage-inducible 45 beta, Arg1 - arginase, liver, Glrx - glutaredoxin, Gpnmb - glycoprotein (transmembrane) nmb, Ptafr - platelet-activating factor receptor, Slc15a3 - …
GO:0002695	negative regulation of leukocyte activation	2.63e-12	6.63e-10	5.46	11038	125	404	25	[Slfn1 - schlafen 1, Samsn1 - sam domain, sh3 domain and nuclear localization signals, 1, Axl - axl receptor tyrosine kinase, Sdc4 - syndecan 4, Id2 - inhibitor of dna binding 2, Ccr2 - chemokine (c-c motif) receptor 2, Flt3 - fms-like tyrosine kinase 3, Cd24a - cd24a antigen, Arg1 - arginase, liver, Gpnmb - glycoprotein (transmembrane) nmb, Socs1 - suppressor of cytokine signaling 1, Nfkbid - nu…
GO:1903708	positive regulation of hemopoiesis	4.06e-12	1e-09	4.95	11038	149	404	27	[Rasgrp1 - ras guanyl releasing protein 1, Tnfsf9 - tumor necrosis factor (ligand) superfamily, member 9, Axl - axl receptor tyrosine kinase, H2-DMa - histocompatibility 2, class ii, locus dma, Il2rg - interleukin 2 receptor, gamma chain, Adam8 - a disintegrin and metallopeptidase domain 8, Id2 - inhibitor of dna binding 2, Il6 - interleukin 6, Ccr2 - chemokine (c-c motif) receptor 2, Il1rl2 - in…
GO:0051250	negative regulation of lymphocyte activation	4.15e-12	1.01e-09	5.87	11038	107	404	23	[Socs1 - suppressor of cytokine signaling 1, Slfn1 - schlafen 1, Samsn1 - sam domain, sh3 domain and nuclear localization signals, 1, Axl - axl receptor tyrosine kinase, Nfkbid - nuclear factor of kappa light polypeptide gene enhancer in b cells inhibitor, delta, Cd74 - cd74 antigen (invariant polypeptide of major histocompatibility complex, class ii antigen-associated), Il10 - interleukin 10, Fg…
GO:0031349	positive regulation of defense response	5e-12	1.19e-09	3.86	11038	248	404	35	[Rasgrp1 - ras guanyl releasing protein 1, Zbp1 - z-dna binding protein 1, Clec7a - c-type lectin domain family 7, member a, Adam8 - a disintegrin and metallopeptidase domain 8, Nlrp10 - nlr family, pyrin domain containing 10, Nfkbia - nuclear factor of kappa light polypeptide gene enhancer in b cells inhibitor, alpha, Il6 - interleukin 6, Rps19 - ribosomal protein s19, Cd14 - cd14 antigen, Ccr2 …
GO:0032101	regulation of response to external stimulus	5.17e-12	1.21e-09	2.78	11038	530	404	54	[Mefv - mediterranean fever, Nfkbia - nuclear factor of kappa light polypeptide gene enhancer in b cells inhibitor, alpha, Aif1 - allograft inflammatory factor 1, Pld4 - phospholipase d family, member 4, Il1rl2 - interleukin 1 receptor-like 2, Cd24a - cd24a antigen, Arg1 - arginase, liver, Il1rl1 - interleukin 1 receptor-like 1, Hsp90aa1 - heat shock protein 90, alpha (cytosolic), class a member …
GO:0071396	cellular response to lipid	6.05e-12	1.4e-09	4.14	11038	211	404	32	[Pde4b - phosphodiesterase 4b, camp specific, Axl - axl receptor tyrosine kinase, Ahr - aryl-hydrocarbon receptor, Nfkbib - nuclear factor of kappa light polypeptide gene enhancer in b cells inhibitor, beta, Cxcl2 - chemokine (c-x-c motif) ligand 2, Il6 - interleukin 6, Id3 - inhibitor of dna binding 3, Cd14 - cd14 antigen, Nlrp3 - nlr family, pyrin domain containing 3, Tnip3 - tnfaip3 interactin…
GO:0010033	response to organic substance	6.1e-12	1.38e-09	2.01	11038	1304	404	96	[Rab20 - rab20, member ras oncogene family, Trim25 - tripartite motif-containing 25, Nr4a2 - nuclear receptor subfamily 4, group a, member 2, Axl - axl receptor tyrosine kinase, Nfil3 - nuclear factor, interleukin 3, regulated, Gbp9 - guanylate-binding protein 9, Mefv - mediterranean fever, Ahr - aryl-hydrocarbon receptor, Nfkbia - nuclear factor of kappa light polypeptide gene enhancer in b cell…
GO:0045580	regulation of T cell differentiation	1.14e-11	2.55e-09	5.89	11038	102	404	22	[Rasgrp1 - ras guanyl releasing protein 1, Tnfsf9 - tumor necrosis factor (ligand) superfamily, member 9, Socs1 - suppressor of cytokine signaling 1, H2-DMa - histocompatibility 2, class ii, locus dma, Nfkbid - nuclear factor of kappa light polypeptide gene enhancer in b cells inhibitor, delta, Cd74 - cd74 antigen (invariant polypeptide of major histocompatibility complex, class ii antigen-associ…
GO:0042127	regulation of cell proliferation	1.37e-11	3.01e-09	2.14	11038	1046	404	82	[Tnfsf9 - tumor necrosis factor (ligand) superfamily, member 9, Slfn1 - schlafen 1, Lmo1 - lim domain only 1, Itgal - integrin alpha l, Itgax - integrin alpha x, Ahr - aryl-hydrocarbon receptor, Nfkbia - nuclear factor of kappa light polypeptide gene enhancer in b cells inhibitor, alpha, Aif1 - allograft inflammatory factor 1, Sdc4 - syndecan 4, Clec2i - c-type lectin domain family 2, member i, O…
GO:0048583	regulation of response to stimulus	1.52e-11	3.29e-09	1.64	11038	2478	404	149	[Trim25 - tripartite motif-containing 25, Avpi1 - arginine vasopressin-induced 1, Samsn1 - sam domain, sh3 domain and nuclear localization signals, 1, Itgal - integrin alpha l, Nr4a2 - nuclear receptor subfamily 4, group a, member 2, Mefv - mediterranean fever, Stmn1 - stathmin 1, Clec2i - c-type lectin domain family 2, member i, Ctsh - cathepsin h, Areg - amphiregulin, Gadd45b - growth arrest an…
GO:0070887	cellular response to chemical stimulus	1.54e-11	3.28e-09	2.11	11038	1087	404	84	[Rab20 - rab20, member ras oncogene family, Trim25 - tripartite motif-containing 25, Nr4a2 - nuclear receptor subfamily 4, group a, member 2, Axl - axl receptor tyrosine kinase, Nfil3 - nuclear factor, interleukin 3, regulated, Gbp9 - guanylate-binding protein 9, Ahr - aryl-hydrocarbon receptor, Nfkbia - nuclear factor of kappa light polypeptide gene enhancer in b cells inhibitor, alpha, Nfkbib -…
GO:0042330	taxis	1.54e-11	3.24e-09	4.38	11038	181	404	29	[Pde4b - phosphodiesterase 4b, camp specific, Ccrl2 - chemokine (c-c motif) receptor-like 2, Ccl6 - chemokine (c-c motif) ligand 6, Adam8 - a disintegrin and metallopeptidase domain 8, Ccl9 - chemokine (c-c motif) ligand 9, Itga1 - integrin alpha 1, Cxcl2 - chemokine (c-x-c motif) ligand 2, Cxcr4 - chemokine (c-x-c motif) receptor 4, Trem1 - triggering receptor expressed on myeloid cells 1, Id2 -…
GO:1903555	regulation of tumor necrosis factor superfamily cytokine production	1.58e-11	3.26e-09	5.06	11038	135	404	25	[Rasgrp1 - ras guanyl releasing protein 1, Errfi1 - erbb receptor feedback inhibitor 1, Axl - axl receptor tyrosine kinase, Adam8 - a disintegrin and metallopeptidase domain 8, Il6 - interleukin 6, Ccr2 - chemokine (c-c motif) receptor 2, Cd14 - cd14 antigen, Flt3 - fms-like tyrosine kinase 3, Cd2 - cd2 antigen, Cd24a - cd24a antigen, Tlr1 - toll-like receptor 1, Ticam1 - toll-like receptor adapt…
GO:0042221	response to chemical	2.63e-11	5.37e-09	1.86	11038	1586	404	108	[Trim25 - tripartite motif-containing 25, Nr4a2 - nuclear receptor subfamily 4, group a, member 2, Mefv - mediterranean fever, Cdc42ep2 - cdc42 effector protein (rho gtpase binding) 2, Ctsh - cathepsin h, Areg - amphiregulin, Ndnf - neuron-derived neurotrophic factor, Glrx - glutaredoxin, Atp1a3 - atpase, na+/k+ transporting, alpha 3 polypeptide, Socs3 - suppressor of cytokine signaling 3, Socs1 …
GO:0050866	negative regulation of cell activation	3.07e-11	6.17e-09	4.91	11038	139	404	25	[Slfn1 - schlafen 1, Samsn1 - sam domain, sh3 domain and nuclear localization signals, 1, Axl - axl receptor tyrosine kinase, Sdc4 - syndecan 4, Id2 - inhibitor of dna binding 2, Ccr2 - chemokine (c-c motif) receptor 2, Flt3 - fms-like tyrosine kinase 3, Cd24a - cd24a antigen, Arg1 - arginase, liver, Gpnmb - glycoprotein (transmembrane) nmb, Socs1 - suppressor of cytokine signaling 1, Nfkbid - nu…
GO:0060326	cell chemotaxis	3.08e-11	6.1e-09	5.12	11038	128	404	24	[Pde4b - phosphodiesterase 4b, camp specific, Ccrl2 - chemokine (c-c motif) receptor-like 2, Ccl6 - chemokine (c-c motif) ligand 6, Adam8 - a disintegrin and metallopeptidase domain 8, Ccl9 - chemokine (c-c motif) ligand 9, Itga1 - integrin alpha 1, Cxcl2 - chemokine (c-x-c motif) ligand 2, Cxcr4 - chemokine (c-x-c motif) receptor 4, Trem1 - triggering receptor expressed on myeloid cells 1, Coro1…
GO:0030595	leukocyte chemotaxis	5.63e-11	1.1e-08	6.07	11038	90	404	20	[Pde4b - phosphodiesterase 4b, camp specific, Ccl6 - chemokine (c-c motif) ligand 6, Ccl9 - chemokine (c-c motif) ligand 9, Adam8 - a disintegrin and metallopeptidase domain 8, Itga1 - integrin alpha 1, Cxcl2 - chemokine (c-x-c motif) ligand 2, Trem1 - triggering receptor expressed on myeloid cells 1, Coro1a - coronin, actin binding protein 1a, Cxcl16 - chemokine (c-x-c motif) ligand 16, Rps19 - …
GO:0006935	chemotaxis	6.29e-11	1.21e-08	4.27	11038	179	404	28	[Pde4b - phosphodiesterase 4b, camp specific, Ccrl2 - chemokine (c-c motif) receptor-like 2, Ccl6 - chemokine (c-c motif) ligand 6, Adam8 - a disintegrin and metallopeptidase domain 8, Ccl9 - chemokine (c-c motif) ligand 9, Itga1 - integrin alpha 1, Cxcl2 - chemokine (c-x-c motif) ligand 2, Cxcr4 - chemokine (c-x-c motif) receptor 4, Trem1 - triggering receptor expressed on myeloid cells 1, Rps19…
GO:0032103	positive regulation of response to external stimulus	6.34e-11	1.2e-08	3.9	11038	217	404	31	[Zbp1 - z-dna binding protein 1, Clec7a - c-type lectin domain family 7, member a, Nlrp10 - nlr family, pyrin domain containing 10, Adam8 - a disintegrin and metallopeptidase domain 8, Nfkbia - nuclear factor of kappa light polypeptide gene enhancer in b cells inhibitor, alpha, Cxcr4 - chemokine (c-x-c motif) receptor 4, Aif1 - allograft inflammatory factor 1, Il6 - interleukin 6, Rps19 - ribosom…
GO:0033993	response to lipid	8.51e-11	1.59e-08	3.16	11038	346	404	40	[Pde4b - phosphodiesterase 4b, camp specific, Il1rn - interleukin 1 receptor antagonist, Axl - axl receptor tyrosine kinase, Nfkbia - nuclear factor of kappa light polypeptide gene enhancer in b cells inhibitor, alpha, Ahr - aryl-hydrocarbon receptor, Nfkbib - nuclear factor of kappa light polypeptide gene enhancer in b cells inhibitor, beta, Cxcl2 - chemokine (c-x-c motif) ligand 2, Il6 - interl…
GO:0032649	regulation of interferon-gamma production	1.32e-10	2.43e-08	7.04	11038	66	404	17	[Rasgrp1 - ras guanyl releasing protein 1, Tnfsf9 - tumor necrosis factor (ligand) superfamily, member 9, Bcl3 - b cell leukemia/lymphoma 3, Pde4b - phosphodiesterase 4b, camp specific, Axl - axl receptor tyrosine kinase, Il10 - interleukin 10, Tnf - tumor necrosis factor, Cd244 - cd244 natural killer cell receptor 2b4, Cd14 - cd14 antigen, Ccr2 - chemokine (c-c motif) receptor 2, Cd274 - cd274 a…
GO:0071310	cellular response to organic substance	1.8e-10	3.28e-08	2.18	11038	888	404	71	[Rab20 - rab20, member ras oncogene family, Trim25 - tripartite motif-containing 25, Nr4a2 - nuclear receptor subfamily 4, group a, member 2, Axl - axl receptor tyrosine kinase, Nfil3 - nuclear factor, interleukin 3, regulated, Gbp9 - guanylate-binding protein 9, Ahr - aryl-hydrocarbon receptor, Nfkbia - nuclear factor of kappa light polypeptide gene enhancer in b cells inhibitor, alpha, Nfkbib -…
GO:0051241	negative regulation of multicellular organismal process	2.37e-10	4.27e-08	2.25	11038	800	404	66	[Axl - axl receptor tyrosine kinase, Chad - chondroadherin, Mefv - mediterranean fever, Ahr - aryl-hydrocarbon receptor, Nfkbia - nuclear factor of kappa light polypeptide gene enhancer in b cells inhibitor, alpha, Clec2i - c-type lectin domain family 2, member i, Areg - amphiregulin, Cd24a - cd24a antigen, Arg1 - arginase, liver, Gpnmb - glycoprotein (transmembrane) nmb, Il1rl1 - interleukin 1 r…
GO:0007166	cell surface receptor signaling pathway	2.43e-10	4.32e-08	2.14	11038	932	404	73	[Itgal - integrin alpha l, Axl - axl receptor tyrosine kinase, Itgax - integrin alpha x, Stmn1 - stathmin 1, Nfkbia - nuclear factor of kappa light polypeptide gene enhancer in b cells inhibitor, alpha, Sdc1 - syndecan 1, Fcrls - fc receptor-like s, scavenger receptor, Clec2i - c-type lectin domain family 2, member i, Itgb7 - integrin beta 7, Cd14 - cd14 antigen, Areg - amphiregulin, Cd24a - cd24…
GO:0032675	regulation of interleukin-6 production	2.78e-10	4.87e-08	5.05	11038	119	404	22	[Tnfsf9 - tumor necrosis factor (ligand) superfamily, member 9, Ptafr - platelet-activating factor receptor, Cd74 - cd74 antigen (invariant polypeptide of major histocompatibility complex, class ii antigen-associated), Cd300ld - cd300 molecule-like family member d, Nlrp10 - nlr family, pyrin domain containing 10, Il10 - interleukin 10, Tnf - tumor necrosis factor, Aif1 - allograft inflammatory fa…
GO:0032680	regulation of tumor necrosis factor production	4.36e-10	7.55e-08	4.72	11038	133	404	23	[Rasgrp1 - ras guanyl releasing protein 1, Ptafr - platelet-activating factor receptor, Bcl3 - b cell leukemia/lymphoma 3, Errfi1 - erbb receptor feedback inhibitor 1, Axl - axl receptor tyrosine kinase, Cd300ld - cd300 molecule-like family member d, Il10 - interleukin 10, Thbs1 - thrombospondin 1, Lpl - lipoprotein lipase, Tnfaip3 - tumor necrosis factor, alpha-induced protein 3, Il6 - interleuk…
GO:0002819	regulation of adaptive immune response	6.91e-10	1.18e-07	4.62	11038	136	404	23	[Irf7 - interferon regulatory factor 7, Samsn1 - sam domain, sh3 domain and nuclear localization signals, 1, H2-Q6 - histocompatibility 2, q region locus 6, H2-DMa - histocompatibility 2, class ii, locus dma, Nfkbid - nuclear factor of kappa light polypeptide gene enhancer in b cells inhibitor, delta, Cd74 - cd74 antigen (invariant polypeptide of major histocompatibility complex, class ii antigen…
GO:0050727	regulation of inflammatory response	8.34e-10	1.41e-07	3.44	11038	254	404	32	[Il1r2 - interleukin 1 receptor, type ii, Zbp1 - z-dna binding protein 1, Clec7a - c-type lectin domain family 7, member a, Mefv - mediterranean fever, Adam8 - a disintegrin and metallopeptidase domain 8, Nlrp10 - nlr family, pyrin domain containing 10, Nfkbia - nuclear factor of kappa light polypeptide gene enhancer in b cells inhibitor, alpha, Il6 - interleukin 6, Rps19 - ribosomal protein s19,…
GO:0034097	response to cytokine	8.58e-10	1.43e-07	2.79	11038	421	404	43	[Rab20 - rab20, member ras oncogene family, Trim25 - tripartite motif-containing 25, Axl - axl receptor tyrosine kinase, Nfil3 - nuclear factor, interleukin 3, regulated, Ybx3 - y box protein 3, Gbp9 - guanylate-binding protein 9, Ccl6 - chemokine (c-c motif) ligand 6, Timp1 - tissue inhibitor of metalloproteinase 1, Mefv - mediterranean fever, Nfkbia - nuclear factor of kappa light polypeptide g…
GO:0002685	regulation of leukocyte migration	1.92e-09	3.16e-07	4.39	11038	143	404	23	[Ptafr - platelet-activating factor receptor, Pla2g7 - phospholipase a2, group vii (platelet-activating factor acetylhydrolase, plasma), Cd74 - cd74 antigen (invariant polypeptide of major histocompatibility complex, class ii antigen-associated), Adam8 - a disintegrin and metallopeptidase domain 8, Dusp1 - dual specificity phosphatase 1, Icam1 - intercellular adhesion molecule 1, St3gal4 - st3 be…
GO:0002250	adaptive immune response	2.17e-09	3.54e-07	4.55	11038	132	404	22	[Irf7 - interferon regulatory factor 7, Ly9 - lymphocyte antigen 9, Bcl3 - b cell leukemia/lymphoma 3, Slamf7 - slam family member 7, Icosl - icos ligand, H2-DMa - histocompatibility 2, class ii, locus dma, Cd74 - cd74 antigen (invariant polypeptide of major histocompatibility complex, class ii antigen-associated), H2-DMb1 - histocompatibility 2, class ii, locus mb1, Nlrp10 - nlr family, pyrin do…
GO:1902533	positive regulation of intracellular signal transduction	2.85e-09	4.59e-07	2.31	11038	663	404	56	[Trim25 - tripartite motif-containing 25, Avpi1 - arginine vasopressin-induced 1, Itgal - integrin alpha l, Axl - axl receptor tyrosine kinase, Cd14 - cd14 antigen, Gadd45b - growth arrest and dna-damage-inducible 45 beta, Cd24a - cd24a antigen, Glrx - glutaredoxin, Hsp90aa1 - heat shock protein 90, alpha (cytosolic), class a member 1, Gpnmb - glycoprotein (transmembrane) nmb, Slc15a3 - solute ca…
GO:0001818	negative regulation of cytokine production	2.94e-09	4.68e-07	3.86	11038	184	404	26	[Il1r2 - interleukin 1 receptor, type ii, Errfi1 - erbb receptor feedback inhibitor 1, Axl - axl receptor tyrosine kinase, Mefv - mediterranean fever, Il6 - interleukin 6, Nlrp3 - nlr family, pyrin domain containing 3, Flt3 - fms-like tyrosine kinase 3, Cd24a - cd24a antigen, Arg1 - arginase, liver, Gpnmb - glycoprotein (transmembrane) nmb, Il1rl1 - interleukin 1 receptor-like 1, Bcl3 - b cell le…
GO:0009617	response to bacterium	3.39e-09	5.34e-07	3.61	11038	212	404	28	[Gbp9 - guanylate-binding protein 9, Nlrp10 - nlr family, pyrin domain containing 10, AA467197 - expressed sequence aa467197, Rps19 - ribosomal protein s19, Cd14 - cd14 antigen, Il7r - interleukin 7 receptor, Nlrp3 - nlr family, pyrin domain containing 3, Rpl39 - ribosomal protein l39, Cd52 - cd52 antigen, Cxcl10 - chemokine (c-x-c motif) ligand 10, Fabp4 - fatty acid binding protein 4, adipocyte…
GO:0050729	positive regulation of inflammatory response	3.44e-09	5.36e-07	5.14	11038	101	404	19	[Zbp1 - z-dna binding protein 1, Clec7a - c-type lectin domain family 7, member a, Adam8 - a disintegrin and metallopeptidase domain 8, Nlrp10 - nlr family, pyrin domain containing 10, Nfkbia - nuclear factor of kappa light polypeptide gene enhancer in b cells inhibitor, alpha, Tnf - tumor necrosis factor, Lpl - lipoprotein lipase, Rps19 - ribosomal protein s19, Il6 - interleukin 6, Ccr2 - chemok…
GO:0002699	positive regulation of immune effector process	3.6e-09	5.54e-07	4.1	11038	160	404	24	[Rasgrp1 - ras guanyl releasing protein 1, Ptafr - platelet-activating factor receptor, H2-Q6 - histocompatibility 2, q region locus 6, Cd74 - cd74 antigen (invariant polypeptide of major histocompatibility complex, class ii antigen-associated), Nfkbid - nuclear factor of kappa light polypeptide gene enhancer in b cells inhibitor, delta, Il10 - interleukin 10, Tnf - tumor necrosis factor, Fgr - g…
GO:0080134	regulation of response to stress	4.5e-09	6.84e-07	1.99	11038	1015	404	74	[Mefv - mediterranean fever, Nfkbia - nuclear factor of kappa light polypeptide gene enhancer in b cells inhibitor, alpha, Cd14 - cd14 antigen, Pld4 - phospholipase d family, member 4, Il1rl2 - interleukin 1 receptor-like 2, Cd24a - cd24a antigen, Gadd45b - growth arrest and dna-damage-inducible 45 beta, Arg1 - arginase, liver, Glrx - glutaredoxin, Hsp90aa1 - heat shock protein 90, alpha (cytosol…
GO:0019221	cytokine-mediated signaling pathway	5.35e-09	8.05e-07	3.88	11038	176	404	25	[Ccl6 - chemokine (c-c motif) ligand 6, Il2rg - interleukin 2 receptor, gamma chain, Nfkbia - nuclear factor of kappa light polypeptide gene enhancer in b cells inhibitor, alpha, Ccl9 - chemokine (c-c motif) ligand 9, Cxcl2 - chemokine (c-x-c motif) ligand 2, Cxcr4 - chemokine (c-x-c motif) receptor 4, Ebi3 - epstein-barr virus induced gene 3, Il6 - interleukin 6, Ccr2 - chemokine (c-c motif) rec…
GO:0097529	myeloid leukocyte migration	6.01e-09	8.95e-07	5.99	11038	73	404	16	[Pde4b - phosphodiesterase 4b, camp specific, Ccl6 - chemokine (c-c motif) ligand 6, Ccl9 - chemokine (c-c motif) ligand 9, Itga1 - integrin alpha 1, Cxcl2 - chemokine (c-x-c motif) ligand 2, Trem1 - triggering receptor expressed on myeloid cells 1, Rps19 - ribosomal protein s19, Cxcl1 - chemokine (c-x-c motif) ligand 1, Ccr2 - chemokine (c-c motif) receptor 2, Vegfa - vascular endothelial growth…
GO:0002697	regulation of immune effector process	6.14e-09	9.05e-07	3.18	11038	275	404	32	[Rasgrp1 - ras guanyl releasing protein 1, H2-Q6 - histocompatibility 2, q region locus 6, Il6 - interleukin 6, Rps19 - ribosomal protein s19, Ccr2 - chemokine (c-c motif) receptor 2, H2-Q7 - histocompatibility 2, q region locus 7, Scimp - slp adaptor and csk interacting membrane protein, Il7r - interleukin 7 receptor, Nlrp3 - nlr family, pyrin domain containing 3, Cd24a - cd24a antigen, Ticam1 -…
GO:1901701	cellular response to oxygen-containing compound	6.67e-09	9.73e-07	2.51	11038	501	404	46	[Pde4b - phosphodiesterase 4b, camp specific, Nr4a2 - nuclear receptor subfamily 4, group a, member 2, Axl - axl receptor tyrosine kinase, Ahr - aryl-hydrocarbon receptor, Icam1 - intercellular adhesion molecule 1, Nfkbib - nuclear factor of kappa light polypeptide gene enhancer in b cells inhibitor, beta, Cxcl2 - chemokine (c-x-c motif) ligand 2, Id3 - inhibitor of dna binding 3, Il6 - interleuk…
GO:0046649	lymphocyte activation	1.03e-08	1.49e-06	3.18	11038	266	404	31	[Rasgrp1 - ras guanyl releasing protein 1, Itgal - integrin alpha l, Axl - axl receptor tyrosine kinase, Zbtb32 - zinc finger and btb domain containing 32, Ahr - aryl-hydrocarbon receptor, Icam1 - intercellular adhesion molecule 1, Cxcr4 - chemokine (c-x-c motif) receptor 4, Batf - basic leucine zipper transcription factor, atf-like, Ebi3 - epstein-barr virus induced gene 3, Id2 - inhibitor of dn…
GO:0008284	positive regulation of cell proliferation	1.36e-08	1.94e-06	2.32	11038	601	404	51	[Tnfsf9 - tumor necrosis factor (ligand) superfamily, member 9, Itgal - integrin alpha l, Itgax - integrin alpha x, Aif1 - allograft inflammatory factor 1, Odc1 - ornithine decarboxylase, structural 1, Ctsh - cathepsin h, Areg - amphiregulin, Pim1 - proviral integration site 1, Cd24a - cd24a antigen, Arg1 - arginase, liver, Hilpda - hypoxia inducible lipid droplet associated, Ptafr - platelet-act…
GO:0048518	positive regulation of biological process	1.42e-08	2e-06	1.38	11038	3858	404	195	[Tnfsf9 - tumor necrosis factor (ligand) superfamily, member 9, Lmo1 - lim domain only 1, Avpi1 - arginine vasopressin-induced 1, Mefv - mediterranean fever, Stmn1 - stathmin 1, Clec2i - c-type lectin domain family 2, member i, Ndc80 - ndc80 homolog, kinetochore complex component (s. cerevisiae), Ctsh - cathepsin h, Pim1 - proviral integration site 1, Gadd45b - growth arrest and dna-damage-induci…
GO:0098542	defense response to other organism	1.47e-08	2.06e-06	3.14	11038	270	404	31	[Trim25 - tripartite motif-containing 25, Zbp1 - z-dna binding protein 1, Ccdc88b - coiled-coil domain containing 88b, Gbp9 - guanylate-binding protein 9, Itgax - integrin alpha x, Nlrp10 - nlr family, pyrin domain containing 10, Trem1 - triggering receptor expressed on myeloid cells 1, Batf - basic leucine zipper transcription factor, atf-like, Il6 - interleukin 6, Rps19 - ribosomal protein s19,…
GO:0007159	leukocyte cell-cell adhesion	1.48e-08	2.05e-06	8	11038	41	404	12	[Ccr2 - chemokine (c-c motif) receptor 2, Itgal - integrin alpha l, Stk10 - serine/threonine kinase 10, Selplg - selectin, platelet (p-selectin) ligand, Icam1 - intercellular adhesion molecule 1, Cd24a - cd24a antigen, Tnf - tumor necrosis factor, Thbs1 - thrombospondin 1, Sema4d - sema domain, immunoglobulin domain (ig), transmembrane domain (tm) and short cytoplasmic domain, (semaphorin) 4d, Il…
GO:0016477	cell migration	1.52e-08	2.08e-06	2.47	11038	497	404	45	[Pde4b - phosphodiesterase 4b, camp specific, Nr4a2 - nuclear receptor subfamily 4, group a, member 2, Itgal - integrin alpha l, Ccrl2 - chemokine (c-c motif) receptor-like 2, Axl - axl receptor tyrosine kinase, Ccl6 - chemokine (c-c motif) ligand 6, Adam8 - a disintegrin and metallopeptidase domain 8, Flrt3 - fibronectin leucine rich transmembrane protein 3, Ccl9 - chemokine (c-c motif) ligand 9…
GO:0032755	positive regulation of interleukin-6 production	1.66e-08	2.25e-06	5.6	11038	78	404	16	[Tnfsf9 - tumor necrosis factor (ligand) superfamily, member 9, Ptafr - platelet-activating factor receptor, Cd74 - cd74 antigen (invariant polypeptide of major histocompatibility complex, class ii antigen-associated), Nlrp10 - nlr family, pyrin domain containing 10, Tnf - tumor necrosis factor, Aif1 - allograft inflammatory factor 1, Lpl - lipoprotein lipase, Il6 - interleukin 6, Scimp - slp ada…
GO:0065007	biological regulation	2.05e-08	2.75e-06	1.21	11038	6810	404	301	[Tnfsf9 - tumor necrosis factor (ligand) superfamily, member 9, Lmo1 - lim domain only 1, Avpi1 - arginine vasopressin-induced 1, Slamf7 - slam family member 7, Samsn1 - sam domain, sh3 domain and nuclear localization signals, 1, Stmn1 - stathmin 1, Mefv - mediterranean fever, Rhov - ras homolog gene family, member v, Clec2i - c-type lectin domain family 2, member i, Ndc80 - ndc80 homolog, kineto…
GO:0002822	regulation of adaptive immune response based on somatic recombination of immune receptors built from immunoglobulin superfamily domains	2.11e-08	2.81e-06	4.41	11038	124	404	20	[H2-Q6 - histocompatibility 2, q region locus 6, H2-DMa - histocompatibility 2, class ii, locus dma, Nfkbid - nuclear factor of kappa light polypeptide gene enhancer in b cells inhibitor, delta, Nlrp10 - nlr family, pyrin domain containing 10, Tnf - tumor necrosis factor, Tnfaip3 - tumor necrosis factor, alpha-induced protein 3, Il6 - interleukin 6, Ccr2 - chemokine (c-c motif) receptor 2, Cd274 …
GO:0022408	negative regulation of cell-cell adhesion	2.79e-08	3.68e-06	4.34	11038	126	404	20	[Socs1 - suppressor of cytokine signaling 1, Slfn1 - schlafen 1, Il1rn - interleukin 1 receptor antagonist, Nfkbid - nuclear factor of kappa light polypeptide gene enhancer in b cells inhibitor, delta, Cd74 - cd74 antigen (invariant polypeptide of major histocompatibility complex, class ii antigen-associated), Adam8 - a disintegrin and metallopeptidase domain 8, Il10 - interleukin 10, Fgl2 - fibr…
GO:0045088	regulation of innate immune response	2.8e-08	3.66e-06	3.28	11038	233	404	28	[Rasgrp1 - ras guanyl releasing protein 1, Zbp1 - z-dna binding protein 1, Adam8 - a disintegrin and metallopeptidase domain 8, Nfkbia - nuclear factor of kappa light polypeptide gene enhancer in b cells inhibitor, alpha, Rps19 - ribosomal protein s19, Cd14 - cd14 antigen, Scimp - slp adaptor and csk interacting membrane protein, Tnip3 - tnfaip3 interacting protein 3, Tlr1 - toll-like receptor 1,…
GO:1902531	regulation of intracellular signal transduction	2.83e-08	3.66e-06	1.86	11038	1162	404	79	[Trim25 - tripartite motif-containing 25, Avpi1 - arginine vasopressin-induced 1, Itgal - integrin alpha l, Axl - axl receptor tyrosine kinase, Stmn1 - stathmin 1, Cd14 - cd14 antigen, Cd24a - cd24a antigen, Gadd45b - growth arrest and dna-damage-inducible 45 beta, Glrx - glutaredoxin, Hsp90aa1 - heat shock protein 90, alpha (cytosolic), class a member 1, Gpnmb - glycoprotein (transmembrane) nmb,…
GO:0002181	cytoplasmic translation	3.63e-08	4.65e-06	8.35	11038	36	404	11	[Rps26 - ribosomal protein s26, Rpl35a - ribosomal protein l35a, Rps23 - ribosomal protein s23, Rps28 - ribosomal protein s28, Rpsa - ribosomal protein sa, Rpl38 - ribosomal protein l38, Rpl39 - ribosomal protein l39, Rpl24 - ribosomal protein l24, Rpl36 - ribosomal protein l36, Rpl18a - ribosomal protein l18a, Rpl17 - ribosomal protein l17]
GO:0050671	positive regulation of lymphocyte proliferation	3.64e-08	4.63e-06	4.99	11038	93	404	17	[Tnfsf9 - tumor necrosis factor (ligand) superfamily, member 9, Itgal - integrin alpha l, Ccdc88b - coiled-coil domain containing 88b, Icosl - icos ligand, Cd74 - cd74 antigen (invariant polypeptide of major histocompatibility complex, class ii antigen-associated), Aif1 - allograft inflammatory factor 1, Coro1a - coronin, actin binding protein 1a, Cd244 - cd244 natural killer cell receptor 2b4, I…
GO:0071621	granulocyte chemotaxis	3.87e-08	4.88e-06	6.7	11038	53	404	13	[Pde4b - phosphodiesterase 4b, camp specific, Ccl6 - chemokine (c-c motif) ligand 6, Ccl9 - chemokine (c-c motif) ligand 9, Itga1 - integrin alpha 1, Cxcl2 - chemokine (c-x-c motif) ligand 2, Trem1 - triggering receptor expressed on myeloid cells 1, Cxcl1 - chemokine (c-x-c motif) ligand 1, Vegfa - vascular endothelial growth factor a, Lgals3 - lectin, galactose binding, soluble 3, Cxcl3 - chemok…
GO:2000106	regulation of leukocyte apoptotic process	4.56e-08	5.69e-06	5.61	11038	73	404	15	[Axl - axl receptor tyrosine kinase, Cd74 - cd74 antigen (invariant polypeptide of major histocompatibility complex, class ii antigen-associated), Nfkbid - nuclear factor of kappa light polypeptide gene enhancer in b cells inhibitor, delta, Niacr1 - niacin receptor 1, Adam8 - a disintegrin and metallopeptidase domain 8, Il10 - interleukin 10, Itpkb - inositol 1,4,5-trisphosphate 3-kinase b, Slc7a…
GO:0040011	locomotion	5.04e-08	6.24e-06	2.27	11038	589	404	49	[Nr4a2 - nuclear receptor subfamily 4, group a, member 2, Itgal - integrin alpha l, Axl - axl receptor tyrosine kinase, Rhov - ras homolog gene family, member v, Sdc1 - syndecan 1, Sdc4 - syndecan 4, Itgb7 - integrin beta 7, Ndnf - neuron-derived neurotrophic factor, Cd24a - cd24a antigen, Hsp90aa1 - heat shock protein 90, alpha (cytosolic), class a member 1, Plxnd1 - plexin d1, Ptafr - platelet-…
GO:0032946	positive regulation of mononuclear cell proliferation	5.06e-08	6.21e-06	4.89	11038	95	404	17	[Tnfsf9 - tumor necrosis factor (ligand) superfamily, member 9, Itgal - integrin alpha l, Ccdc88b - coiled-coil domain containing 88b, Icosl - icos ligand, Cd74 - cd74 antigen (invariant polypeptide of major histocompatibility complex, class ii antigen-associated), Aif1 - allograft inflammatory factor 1, Coro1a - coronin, actin binding protein 1a, Cd244 - cd244 natural killer cell receptor 2b4, I…
GO:0050789	regulation of biological process	8.02e-08	9.74e-06	1.21	11038	6492	404	288	[Tnfsf9 - tumor necrosis factor (ligand) superfamily, member 9, Lmo1 - lim domain only 1, Avpi1 - arginine vasopressin-induced 1, Slamf7 - slam family member 7, Samsn1 - sam domain, sh3 domain and nuclear localization signals, 1, Stmn1 - stathmin 1, Mefv - mediterranean fever, Rhov - ras homolog gene family, member v, Clec2i - c-type lectin domain family 2, member i, Ndc80 - ndc80 homolog, kineto…
GO:0042102	positive regulation of T cell proliferation	8.43e-08	1.01e-05	5.8	11038	66	404	14	[Tnfsf9 - tumor necrosis factor (ligand) superfamily, member 9, Itgal - integrin alpha l, Ccdc88b - coiled-coil domain containing 88b, Icosl - icos ligand, Aif1 - allograft inflammatory factor 1, Coro1a - coronin, actin binding protein 1a, Cd244 - cd244 natural killer cell receptor 2b4, Il6 - interleukin 6, Vcam1 - vascular cell adhesion molecule 1, Ccr2 - chemokine (c-c motif) receptor 2, Cd274 …
GO:0030334	regulation of cell migration	9.74e-08	1.16e-05	2.2	11038	620	404	50	[Itgax - integrin alpha x, Aif1 - allograft inflammatory factor 1, Sdc4 - syndecan 4, Ctsh - cathepsin h, Gpnmb - glycoprotein (transmembrane) nmb, Plxnd1 - plexin d1, Olfm1 - olfactomedin 1, Ptafr - platelet-activating factor receptor, Cd74 - cd74 antigen (invariant polypeptide of major histocompatibility complex, class ii antigen-associated), St3gal4 - st3 beta-galactoside alpha-2,3-sialyltrans…
GO:0030593	neutrophil chemotaxis	1.04e-07	1.23e-05	6.83	11038	48	404	12	[Cxcl1 - chemokine (c-x-c motif) ligand 1, Pde4b - phosphodiesterase 4b, camp specific, Ccl6 - chemokine (c-c motif) ligand 6, Ccl9 - chemokine (c-c motif) ligand 9, Itga1 - integrin alpha 1, Cxcl2 - chemokine (c-x-c motif) ligand 2, Lgals3 - lectin, galactose binding, soluble 3, Cxcl3 - chemokine (c-x-c motif) ligand 3, Trem1 - triggering receptor expressed on myeloid cells 1, Cxcl10 - chemokine…
GO:0007162	negative regulation of cell adhesion	1.09e-07	1.28e-05	3.45	11038	190	404	24	[Socs1 - suppressor of cytokine signaling 1, Slfn1 - schlafen 1, Il1rn - interleukin 1 receptor antagonist, Nfkbid - nuclear factor of kappa light polypeptide gene enhancer in b cells inhibitor, delta, Cd74 - cd74 antigen (invariant polypeptide of major histocompatibility complex, class ii antigen-associated), Adam8 - a disintegrin and metallopeptidase domain 8, Il10 - interleukin 10, Dusp1 - dua…
GO:0002366	leukocyte activation involved in immune response	1.11e-07	1.29e-05	4.64	11038	100	404	17	[Rasgrp1 - ras guanyl releasing protein 1, Bcl3 - b cell leukemia/lymphoma 3, Itgal - integrin alpha l, Icosl - icos ligand, Cd74 - cd74 antigen (invariant polypeptide of major histocompatibility complex, class ii antigen-associated), Icam1 - intercellular adhesion molecule 1, Fgl2 - fibrinogen-like protein 2, Coro1a - coronin, actin binding protein 1a, Batf - basic leucine zipper transcription f…
GO:0002705	positive regulation of leukocyte mediated immunity	1.11e-07	1.28e-05	4.64	11038	100	404	17	[Rasgrp1 - ras guanyl releasing protein 1, Ptafr - platelet-activating factor receptor, H2-Q6 - histocompatibility 2, q region locus 6, Tnf - tumor necrosis factor, Fgr - gardner-rasheed feline sarcoma viral (fgr) oncogene homolog, Il6 - interleukin 6, Cxcl1 - chemokine (c-x-c motif) ligand 1, H2-Q7 - histocompatibility 2, q region locus 7, Scimp - slp adaptor and csk interacting membrane protein…
GO:0002688	regulation of leukocyte chemotaxis	1.16e-07	1.33e-05	5.25	11038	78	404	15	[Pla2g7 - phospholipase a2, group vii (platelet-activating factor acetylhydrolase, plasma), Cd74 - cd74 antigen (invariant polypeptide of major histocompatibility complex, class ii antigen-associated), Dusp1 - dual specificity phosphatase 1, Aif1 - allograft inflammatory factor 1, Thbs1 - thrombospondin 1, Tnfsf14 - tumor necrosis factor (ligand) superfamily, member 14, Padi2 - peptidyl arginine …
GO:1903038	negative regulation of leukocyte cell-cell adhesion	1.18e-07	1.33e-05	4.91	11038	89	404	16	[Slfn1 - schlafen 1, Socs1 - suppressor of cytokine signaling 1, Nfkbid - nuclear factor of kappa light polypeptide gene enhancer in b cells inhibitor, delta, Cd74 - cd74 antigen (invariant polypeptide of major histocompatibility complex, class ii antigen-associated), Adam8 - a disintegrin and metallopeptidase domain 8, Fgl2 - fibrinogen-like protein 2, Sdc4 - syndecan 4, Lrrc32 - leucine rich re…
GO:0070665	positive regulation of leukocyte proliferation	1.5e-07	1.69e-05	4.55	11038	102	404	17	[Tnfsf9 - tumor necrosis factor (ligand) superfamily, member 9, Itgal - integrin alpha l, Ccdc88b - coiled-coil domain containing 88b, Icosl - icos ligand, Cd74 - cd74 antigen (invariant polypeptide of major histocompatibility complex, class ii antigen-associated), Aif1 - allograft inflammatory factor 1, Coro1a - coronin, actin binding protein 1a, Il6 - interleukin 6, Cd244 - cd244 natural killer…
GO:0097530	granulocyte migration	1.53e-07	1.7e-05	6.02	11038	59	404	13	[Pde4b - phosphodiesterase 4b, camp specific, Ccl6 - chemokine (c-c motif) ligand 6, Ccl9 - chemokine (c-c motif) ligand 9, Itga1 - integrin alpha 1, Cxcl2 - chemokine (c-x-c motif) ligand 2, Trem1 - triggering receptor expressed on myeloid cells 1, Cxcl1 - chemokine (c-x-c motif) ligand 1, Vegfa - vascular endothelial growth factor a, Lgals3 - lectin, galactose binding, soluble 3, Cxcl3 - chemok…
GO:0048870	cell motility	1.6e-07	1.77e-05	2.29	11038	538	404	45	[Pde4b - phosphodiesterase 4b, camp specific, Nr4a2 - nuclear receptor subfamily 4, group a, member 2, Itgal - integrin alpha l, Ccrl2 - chemokine (c-c motif) receptor-like 2, Axl - axl receptor tyrosine kinase, Ccl6 - chemokine (c-c motif) ligand 6, Adam8 - a disintegrin and metallopeptidase domain 8, Flrt3 - fibronectin leucine rich transmembrane protein 3, Ccl9 - chemokine (c-c motif) ligand 9…
GO:0033089	positive regulation of T cell differentiation in thymus	1.77e-07	1.95e-05	18.21	11038	9	404	6	[Rasgrp1 - ras guanyl releasing protein 1, Il7r - interleukin 7 receptor, Adam8 - a disintegrin and metallopeptidase domain 8, Il2rg - interleukin 2 receptor, gamma chain, Il1a - interleukin 1 alpha, Il1b - interleukin 1 beta]
GO:0046634	regulation of alpha-beta T cell activation	1.84e-07	2.01e-05	5.46	11038	70	404	14	[Socs1 - suppressor of cytokine signaling 1, Nfkbid - nuclear factor of kappa light polypeptide gene enhancer in b cells inhibitor, delta, Il2rg - interleukin 2 receptor, gamma chain, Itpkb - inositol 1,4,5-trisphosphate 3-kinase b, Cd244 - cd244 natural killer cell receptor 2b4, Il6 - interleukin 6, Ccr2 - chemokine (c-c motif) receptor 2, Cd274 - cd274 antigen, Nlrp3 - nlr family, pyrin domain …
GO:0050868	negative regulation of T cell activation	1.95e-07	2.11e-05	5.06	11038	81	404	15	[Slfn1 - schlafen 1, Socs1 - suppressor of cytokine signaling 1, Nfkbid - nuclear factor of kappa light polypeptide gene enhancer in b cells inhibitor, delta, Cd74 - cd74 antigen (invariant polypeptide of major histocompatibility complex, class ii antigen-associated), Fgl2 - fibrinogen-like protein 2, Sdc4 - syndecan 4, Lrrc32 - leucine rich repeat containing 32, Cd274 - cd274 antigen, H2-Aa - hi…
GO:0002263	cell activation involved in immune response	2e-07	2.15e-05	4.47	11038	104	404	17	[Rasgrp1 - ras guanyl releasing protein 1, Bcl3 - b cell leukemia/lymphoma 3, Itgal - integrin alpha l, Icosl - icos ligand, Cd74 - cd74 antigen (invariant polypeptide of major histocompatibility complex, class ii antigen-associated), Icam1 - intercellular adhesion molecule 1, Fgl2 - fibrinogen-like protein 2, Coro1a - coronin, actin binding protein 1a, Batf - basic leucine zipper transcription f…
GO:0002285	lymphocyte activation involved in immune response	2.22e-07	2.36e-05	5.39	11038	71	404	14	[Bcl3 - b cell leukemia/lymphoma 3, Itgal - integrin alpha l, Icosl - icos ligand, Cd74 - cd74 antigen (invariant polypeptide of major histocompatibility complex, class ii antigen-associated), Icam1 - intercellular adhesion molecule 1, Fgl2 - fibrinogen-like protein 2, Batf - basic leucine zipper transcription factor, atf-like, Coro1a - coronin, actin binding protein 1a, Tnfaip3 - tumor necrosis …
GO:0032102	negative regulation of response to external stimulus	2.28e-07	2.41e-05	3.22	11038	212	404	25	[Il1r2 - interleukin 1 receptor, type ii, Mefv - mediterranean fever, Dusp1 - dual specificity phosphatase 1, Aif1 - allograft inflammatory factor 1, Rps19 - ribosomal protein s19, Padi2 - peptidyl arginine deiminase, type ii, Nlrp3 - nlr family, pyrin domain containing 3, Cd24a - cd24a antigen, Cdkn1a - cyclin-dependent kinase inhibitor 1a (p21), Cxcl13 - chemokine (c-x-c motif) ligand 13, Socs3…
GO:0051716	cellular response to stimulus	3.15e-07	3.3e-05	1.57	11038	1916	404	110	[Trim25 - tripartite motif-containing 25, Mcm5 - minichromosome maintenance deficient 5, cell division cycle 46 (s. cerevisiae), Nr4a2 - nuclear receptor subfamily 4, group a, member 2, Cdc42ep2 - cdc42 effector protein (rho gtpase binding) 2, Ndnf - neuron-derived neurotrophic factor, Glrx - glutaredoxin, Atp1a3 - atpase, na+/k+ transporting, alpha 3 polypeptide, Socs3 - suppressor of cytokine s…
GO:2000145	regulation of cell motility	3.15e-07	3.28e-05	2.12	11038	644	404	50	[Itgax - integrin alpha x, Aif1 - allograft inflammatory factor 1, Sdc4 - syndecan 4, Ctsh - cathepsin h, Gpnmb - glycoprotein (transmembrane) nmb, Plxnd1 - plexin d1, Olfm1 - olfactomedin 1, Ptafr - platelet-activating factor receptor, Cd74 - cd74 antigen (invariant polypeptide of major histocompatibility complex, class ii antigen-associated), St3gal4 - st3 beta-galactoside alpha-2,3-sialyltrans…
GO:0002252	immune effector process	3.27e-07	3.38e-05	2.74	11038	309	404	31	[Rasgrp1 - ras guanyl releasing protein 1, Trim25 - tripartite motif-containing 25, Zbp1 - z-dna binding protein 1, Itgal - integrin alpha l, H2-DMa - histocompatibility 2, class ii, locus dma, Itgax - integrin alpha x, Icam1 - intercellular adhesion molecule 1, Trem1 - triggering receptor expressed on myeloid cells 1, Batf - basic leucine zipper transcription factor, atf-like, Il6 - interleukin …
GO:1990266	neutrophil migration	3.36e-07	3.45e-05	6.19	11038	53	404	12	[Cxcl1 - chemokine (c-x-c motif) ligand 1, Pde4b - phosphodiesterase 4b, camp specific, Ccl6 - chemokine (c-c motif) ligand 6, Ccl9 - chemokine (c-c motif) ligand 9, Itga1 - integrin alpha 1, Lgals3 - lectin, galactose binding, soluble 3, Cxcl2 - chemokine (c-x-c motif) ligand 2, Cxcl3 - chemokine (c-x-c motif) ligand 3, Trem1 - triggering receptor expressed on myeloid cells 1, Cxcl10 - chemokine…
GO:0051270	regulation of cellular component movement	3.45e-07	3.51e-05	2.08	11038	684	404	52	[Itgax - integrin alpha x, Stmn1 - stathmin 1, Aif1 - allograft inflammatory factor 1, Sdc4 - syndecan 4, Ctsh - cathepsin h, Gpnmb - glycoprotein (transmembrane) nmb, Plxnd1 - plexin d1, Olfm1 - olfactomedin 1, Ptafr - platelet-activating factor receptor, Cd74 - cd74 antigen (invariant polypeptide of major histocompatibility complex, class ii antigen-associated), St3gal4 - st3 beta-galactoside a…
GO:0019886	antigen processing and presentation of exogenous peptide antigen via MHC class II	4.17e-07	4.22e-05	12.75	11038	15	404	7	[H2-Aa - histocompatibility 2, class ii antigen a, alpha, H2-Ab1 - histocompatibility 2, class ii antigen a, beta 1, H2-DMa - histocompatibility 2, class ii, locus dma, H2-DMb1 - histocompatibility 2, class ii, locus mb1, Cd74 - cd74 antigen (invariant polypeptide of major histocompatibility complex, class ii antigen-associated), H2-DMb2 - histocompatibility 2, class ii, locus mb2, H2-Eb1 - histo…
GO:0002687	positive regulation of leukocyte migration	4.67e-07	4.68e-05	4.46	11038	98	404	16	[Ptafr - platelet-activating factor receptor, Pla2g7 - phospholipase a2, group vii (platelet-activating factor acetylhydrolase, plasma), Cd74 - cd74 antigen (invariant polypeptide of major histocompatibility complex, class ii antigen-associated), Adam8 - a disintegrin and metallopeptidase domain 8, Icam1 - intercellular adhesion molecule 1, St3gal4 - st3 beta-galactoside alpha-2,3-sialyltransfera…
GO:0042110	T cell activation	4.93e-07	4.92e-05	3.52	11038	163	404	21	[Rasgrp1 - ras guanyl releasing protein 1, Bcl3 - b cell leukemia/lymphoma 3, Itgal - integrin alpha l, Zbtb32 - zinc finger and btb domain containing 32, Icosl - icos ligand, Cd74 - cd74 antigen (invariant polypeptide of major histocompatibility complex, class ii antigen-associated), Icam1 - intercellular adhesion molecule 1, Itpkb - inositol 1,4,5-trisphosphate 3-kinase b, Cxcr4 - chemokine (c-…
GO:1903556	negative regulation of tumor necrosis factor superfamily cytokine production	5.79e-07	5.73e-05	6.53	11038	46	404	11	[Cd274 - cd274 antigen, Bcl3 - b cell leukemia/lymphoma 3, Errfi1 - erbb receptor feedback inhibitor 1, Axl - axl receptor tyrosine kinase, Flt3 - fms-like tyrosine kinase 3, Cd24a - cd24a antigen, Il10 - interleukin 10, Clec4a2 - c-type lectin domain family 4, member a2, Zc3h12a - zinc finger ccch type containing 12a, Gpnmb - glycoprotein (transmembrane) nmb, Tnfaip3 - tumor necrosis factor, alp…
GO:0002274	myeloid leukocyte activation	6.02e-07	5.91e-05	4.66	11038	88	404	15	[Rasgrp1 - ras guanyl releasing protein 1, Irf4 - interferon regulatory factor 4, Tnfsf9 - tumor necrosis factor (ligand) superfamily, member 9, Batf3 - basic leucine zipper transcription factor, atf-like 3, Ndrg1 - n-myc downstream regulated gene 1, Pilrb1 - paired immunoglobin-like type 2 receptor beta 1, Tnf - tumor necrosis factor, Aif1 - allograft inflammatory factor 1, Batf - basic leucine …
GO:0002764	immune response-regulating signaling pathway	6.58e-07	6.42e-05	3.59	11038	152	404	20	[Pde4b - phosphodiesterase 4b, camp specific, Icosl - icos ligand, Nfkbid - nuclear factor of kappa light polypeptide gene enhancer in b cells inhibitor, delta, Nfkbia - nuclear factor of kappa light polypeptide gene enhancer in b cells inhibitor, alpha, Tnf - tumor necrosis factor, Clec2i - c-type lectin domain family 2, member i, Cd14 - cd14 antigen, Scimp - slp adaptor and csk interacting memb…
GO:0032729	positive regulation of interferon-gamma production	7.31e-07	7.08e-05	6.39	11038	47	404	11	[Rasgrp1 - ras guanyl releasing protein 1, Cd14 - cd14 antigen, Ccr2 - chemokine (c-c motif) receptor 2, Tnfsf9 - tumor necrosis factor (ligand) superfamily, member 9, Pde4b - phosphodiesterase 4b, camp specific, Bcl3 - b cell leukemia/lymphoma 3, Flt3 - fms-like tyrosine kinase 3, Cd2 - cd2 antigen, Tnf - tumor necrosis factor, Il1b - interleukin 1 beta, Cd244 - cd244 natural killer cell recepto…
GO:0048522	positive regulation of cellular process	7.32e-07	7.04e-05	1.36	11038	3478	404	173	[Trim25 - tripartite motif-containing 25, Tnfsf9 - tumor necrosis factor (ligand) superfamily, member 9, Lmo1 - lim domain only 1, Avpi1 - arginine vasopressin-induced 1, Itgal - integrin alpha l, Nr4a2 - nuclear receptor subfamily 4, group a, member 2, Itgax - integrin alpha x, Mefv - mediterranean fever, Stmn1 - stathmin 1, Spink2 - serine peptidase inhibitor, kazal type 2, Clec2i - c-type lect…
GO:1901700	response to oxygen-containing compound	7.67e-07	7.33e-05	1.99	11038	741	404	54	[Nr4a2 - nuclear receptor subfamily 4, group a, member 2, Axl - axl receptor tyrosine kinase, Ahr - aryl-hydrocarbon receptor, Nfkbia - nuclear factor of kappa light polypeptide gene enhancer in b cells inhibitor, alpha, Nfkbib - nuclear factor of kappa light polypeptide gene enhancer in b cells inhibitor, beta, Cd14 - cd14 antigen, Ctsh - cathepsin h, Areg - amphiregulin, Glrx - glutaredoxin, At…
GO:0002821	positive regulation of adaptive immune response	8.12e-07	7.71e-05	4.55	11038	90	404	15	[H2-Q6 - histocompatibility 2, q region locus 6, H2-DMa - histocompatibility 2, class ii, locus dma, Nfkbid - nuclear factor of kappa light polypeptide gene enhancer in b cells inhibitor, delta, Cd74 - cd74 antigen (invariant polypeptide of major histocompatibility complex, class ii antigen-associated), Nlrp10 - nlr family, pyrin domain containing 10, Tnf - tumor necrosis factor, Il6 - interleuki…
GO:0002703	regulation of leukocyte mediated immunity	8.13e-07	7.66e-05	3.55	11038	154	404	20	[Rasgrp1 - ras guanyl releasing protein 1, Ptafr - platelet-activating factor receptor, H2-Q6 - histocompatibility 2, q region locus 6, Tnf - tumor necrosis factor, Fgr - gardner-rasheed feline sarcoma viral (fgr) oncogene homolog, Il6 - interleukin 6, Cxcl1 - chemokine (c-x-c motif) ligand 1, Ccr2 - chemokine (c-c motif) receptor 2, H2-Q7 - histocompatibility 2, q region locus 7, Scimp - slp ada…
GO:0040012	regulation of locomotion	9.72e-07	9.09e-05	2.03	11038	688	404	51	[Trim25 - tripartite motif-containing 25, Itgax - integrin alpha x, Aif1 - allograft inflammatory factor 1, Sdc4 - syndecan 4, Ctsh - cathepsin h, Gpnmb - glycoprotein (transmembrane) nmb, Plxnd1 - plexin d1, Olfm1 - olfactomedin 1, Ptafr - platelet-activating factor receptor, Cd74 - cd74 antigen (invariant polypeptide of major histocompatibility complex, class ii antigen-associated), St3gal4 - s…
GO:0001932	regulation of protein phosphorylation	9.9e-07	9.2e-05	1.85	11038	928	404	63	[Slfn1 - schlafen 1, Avpi1 - arginine vasopressin-induced 1, Samsn1 - sam domain, sh3 domain and nuclear localization signals, 1, Aif1 - allograft inflammatory factor 1, Sdc4 - syndecan 4, Areg - amphiregulin, Pim1 - proviral integration site 1, Cd24a - cd24a antigen, Gadd45b - growth arrest and dna-damage-inducible 45 beta, Hsp90aa1 - heat shock protein 90, alpha (cytosolic), class a member 1, G…
GO:0045937	positive regulation of phosphate metabolic process	9.95e-07	9.19e-05	2.01	11038	708	404	52	[Avpi1 - arginine vasopressin-induced 1, Axl - axl receptor tyrosine kinase, Aif1 - allograft inflammatory factor 1, Sdc4 - syndecan 4, Areg - amphiregulin, Pim1 - proviral integration site 1, Gadd45b - growth arrest and dna-damage-inducible 45 beta, Cd24a - cd24a antigen, Hsp90aa1 - heat shock protein 90, alpha (cytosolic), class a member 1, Gpnmb - glycoprotein (transmembrane) nmb, Ptafr - plat…
GO:0010562	positive regulation of phosphorus metabolic process	9.95e-07	9.12e-05	2.01	11038	708	404	52	[Avpi1 - arginine vasopressin-induced 1, Axl - axl receptor tyrosine kinase, Aif1 - allograft inflammatory factor 1, Sdc4 - syndecan 4, Areg - amphiregulin, Pim1 - proviral integration site 1, Gadd45b - growth arrest and dna-damage-inducible 45 beta, Cd24a - cd24a antigen, Hsp90aa1 - heat shock protein 90, alpha (cytosolic), class a member 1, Gpnmb - glycoprotein (transmembrane) nmb, Ptafr - plat…
GO:0070098	chemokine-mediated signaling pathway	1.06e-06	9.68e-05	7.93	11038	31	404	9	[Cxcl1 - chemokine (c-x-c motif) ligand 1, Ccl6 - chemokine (c-c motif) ligand 6, Ccl9 - chemokine (c-c motif) ligand 9, Cxcl2 - chemokine (c-x-c motif) ligand 2, Gpr35 - g protein-coupled receptor 35, Cxcl3 - chemokine (c-x-c motif) ligand 3, Cxcr4 - chemokine (c-x-c motif) receptor 4, Cxcl10 - chemokine (c-x-c motif) ligand 10, Cxcl13 - chemokine (c-x-c motif) ligand 13]
GO:0001816	cytokine production	1.07e-06	9.67e-05	4.2	11038	104	404	16	[Rasgrp1 - ras guanyl releasing protein 1, Irf7 - interferon regulatory factor 7, Ptafr - platelet-activating factor receptor, Trem1 - triggering receptor expressed on myeloid cells 1, Tnf - tumor necrosis factor, Aif1 - allograft inflammatory factor 1, Wnt11 - wingless-related mmtv integration site 11, Batf - basic leucine zipper transcription factor, atf-like, Il6 - interleukin 6, Scimp - slp a…
GO:0045087	innate immune response	1.1e-06	9.85e-05	2.64	11038	310	404	30	[Trim25 - tripartite motif-containing 25, Zbp1 - z-dna binding protein 1, Slamf7 - slam family member 7, Axl - axl receptor tyrosine kinase, Mefv - mediterranean fever, Nlrp10 - nlr family, pyrin domain containing 10, Cd14 - cd14 antigen, Pld4 - phospholipase d family, member 4, Il1rl2 - interleukin 1 receptor-like 2, Nlrp3 - nlr family, pyrin domain containing 3, Cd24a - cd24a antigen, Rpl39 - r…
GO:0010646	regulation of cell communication	1.11e-06	9.92e-05	1.51	11038	2057	404	114	[Trim25 - tripartite motif-containing 25, Avpi1 - arginine vasopressin-induced 1, Itgal - integrin alpha l, Nr4a2 - nuclear receptor subfamily 4, group a, member 2, Stmn1 - stathmin 1, Ctsh - cathepsin h, Areg - amphiregulin, Gadd45b - growth arrest and dna-damage-inducible 45 beta, Arg1 - arginase, liver, Glrx - glutaredoxin, Gpnmb - glycoprotein (transmembrane) nmb, Cish - cytokine inducible sh…
GO:0001934	positive regulation of protein phosphorylation	1.16e-06	0.000103	2.09	11038	615	404	47	[Rasgrp1 - ras guanyl releasing protein 1, Avpi1 - arginine vasopressin-induced 1, Il1rn - interleukin 1 receptor antagonist, Ccl6 - chemokine (c-c motif) ligand 6, Adam8 - a disintegrin and metallopeptidase domain 8, Ccl9 - chemokine (c-c motif) ligand 9, Itga1 - integrin alpha 1, Icam1 - intercellular adhesion molecule 1, Cxcr4 - chemokine (c-x-c motif) receptor 4, Aif1 - allograft inflammatory…
GO:0002718	regulation of cytokine production involved in immune response	1.16e-06	0.000102	5.56	11038	59	404	12	[Ccr2 - chemokine (c-c motif) receptor 2, Scimp - slp adaptor and csk interacting membrane protein, Nlrp3 - nlr family, pyrin domain containing 3, Cd74 - cd74 antigen (invariant polypeptide of major histocompatibility complex, class ii antigen-associated), Il10 - interleukin 10, Arg1 - arginase, liver, Nr4a3 - nuclear receptor subfamily 4, group a, member 3, Ticam1 - toll-like receptor adaptor mo…
GO:0002495	antigen processing and presentation of peptide antigen via MHC class II	1.18e-06	0.000104	11.25	11038	17	404	7	[H2-Aa - histocompatibility 2, class ii antigen a, alpha, H2-Ab1 - histocompatibility 2, class ii antigen a, beta 1, H2-DMa - histocompatibility 2, class ii, locus dma, H2-DMb1 - histocompatibility 2, class ii, locus mb1, Cd74 - cd74 antigen (invariant polypeptide of major histocompatibility complex, class ii antigen-associated), H2-DMb2 - histocompatibility 2, class ii, locus mb2, H2-Eb1 - histo…
GO:0002504	antigen processing and presentation of peptide or polysaccharide antigen via MHC class II	1.18e-06	0.000103	11.25	11038	17	404	7	[H2-Aa - histocompatibility 2, class ii antigen a, alpha, H2-Ab1 - histocompatibility 2, class ii antigen a, beta 1, H2-DMa - histocompatibility 2, class ii, locus dma, H2-DMb1 - histocompatibility 2, class ii, locus mb1, Cd74 - cd74 antigen (invariant polypeptide of major histocompatibility complex, class ii antigen-associated), H2-DMb2 - histocompatibility 2, class ii, locus mb2, H2-Eb1 - histo…
GO:0072676	lymphocyte migration	1.22e-06	0.000106	6.83	11038	40	404	10	[Ccr2 - chemokine (c-c motif) receptor 2, Itgal - integrin alpha l, Ccl6 - chemokine (c-c motif) ligand 6, Adam8 - a disintegrin and metallopeptidase domain 8, Ccl9 - chemokine (c-c motif) ligand 9, Icam1 - intercellular adhesion molecule 1, Cxcl10 - chemokine (c-x-c motif) ligand 10, Cxcl16 - chemokine (c-x-c motif) ligand 16, Itgb7 - integrin beta 7, Cxcl13 - chemokine (c-x-c motif) ligand 13]
GO:0019220	regulation of phosphate metabolic process	1.23e-06	0.000106	1.74	11038	1143	404	73	[Slfn1 - schlafen 1, Avpi1 - arginine vasopressin-induced 1, Samsn1 - sam domain, sh3 domain and nuclear localization signals, 1, Axl - axl receptor tyrosine kinase, Ahr - aryl-hydrocarbon receptor, Aif1 - allograft inflammatory factor 1, Sdc4 - syndecan 4, Me2 - malic enzyme 2, nad(+)-dependent, mitochondrial, Areg - amphiregulin, Pim1 - proviral integration site 1, Cd24a - cd24a antigen, Gadd45…
GO:0007186	G protein-coupled receptor signaling pathway	1.26e-06	0.000108	2.94	11038	232	404	25	[Ltb4r1 - leukotriene b4 receptor 1, Ccrl2 - chemokine (c-c motif) receptor-like 2, Ccl6 - chemokine (c-c motif) ligand 6, Ramp1 - receptor (calcitonin) activity modifying protein 1, Niacr1 - niacin receptor 1, Ccl9 - chemokine (c-c motif) ligand 9, Gpr132 - g protein-coupled receptor 132, Cxcr4 - chemokine (c-x-c motif) receptor 4, Ccr2 - chemokine (c-c motif) receptor 2, Areg - amphiregulin, Gp…
GO:0051174	regulation of phosphorus metabolic process	1.27e-06	0.000108	1.74	11038	1144	404	73	[Slfn1 - schlafen 1, Avpi1 - arginine vasopressin-induced 1, Samsn1 - sam domain, sh3 domain and nuclear localization signals, 1, Axl - axl receptor tyrosine kinase, Ahr - aryl-hydrocarbon receptor, Aif1 - allograft inflammatory factor 1, Sdc4 - syndecan 4, Me2 - malic enzyme 2, nad(+)-dependent, mitochondrial, Areg - amphiregulin, Pim1 - proviral integration site 1, Cd24a - cd24a antigen, Gadd45…
GO:0042832	defense response to protozoan	1.32e-06	0.000111	9.11	11038	24	404	8	[Irf4 - interferon regulatory factor 4, Bcl3 - b cell leukemia/lymphoma 3, Ccdc88b - coiled-coil domain containing 88b, Gbp9 - guanylate-binding protein 9, Il10 - interleukin 10, Arg1 - arginase, liver, Batf - basic leucine zipper transcription factor, atf-like, Il6 - interleukin 6]
GO:0045089	positive regulation of innate immune response	1.36e-06	0.000114	3.44	11038	159	404	20	[Rasgrp1 - ras guanyl releasing protein 1, Irf7 - interferon regulatory factor 7, Zbp1 - z-dna binding protein 1, Slc15a3 - solute carrier family 15, member 3, Cd74 - cd74 antigen (invariant polypeptide of major histocompatibility complex, class ii antigen-associated), Adam8 - a disintegrin and metallopeptidase domain 8, Nfkbia - nuclear factor of kappa light polypeptide gene enhancer in b cells …
GO:0046635	positive regulation of alpha-beta T cell activation	1.42e-06	0.000119	6.01	11038	50	404	11	[Ccr2 - chemokine (c-c motif) receptor 2, Socs1 - suppressor of cytokine signaling 1, Nlrp3 - nlr family, pyrin domain containing 3, H2-Ab1 - histocompatibility 2, class ii antigen a, beta 1, Nfkbid - nuclear factor of kappa light polypeptide gene enhancer in b cells inhibitor, delta, Il2rg - interleukin 2 receptor, gamma chain, Cd24a - cd24a antigen, Itpkb - inositol 1,4,5-trisphosphate 3-kinase…
GO:0042327	positive regulation of phosphorylation	1.42e-06	0.000118	2.03	11038	658	404	49	[Avpi1 - arginine vasopressin-induced 1, Axl - axl receptor tyrosine kinase, Aif1 - allograft inflammatory factor 1, Sdc4 - syndecan 4, Areg - amphiregulin, Pim1 - proviral integration site 1, Gadd45b - growth arrest and dna-damage-inducible 45 beta, Cd24a - cd24a antigen, Hsp90aa1 - heat shock protein 90, alpha (cytosolic), class a member 1, Gpnmb - glycoprotein (transmembrane) nmb, Fam129a - fa…
GO:0023051	regulation of signaling	1.42e-06	0.000117	1.51	11038	2067	404	114	[Trim25 - tripartite motif-containing 25, Avpi1 - arginine vasopressin-induced 1, Itgal - integrin alpha l, Nr4a2 - nuclear receptor subfamily 4, group a, member 2, Stmn1 - stathmin 1, Ctsh - cathepsin h, Areg - amphiregulin, Gadd45b - growth arrest and dna-damage-inducible 45 beta, Arg1 - arginase, liver, Glrx - glutaredoxin, Gpnmb - glycoprotein (transmembrane) nmb, Cish - cytokine inducible sh…
GO:0010941	regulation of cell death	1.53e-06	0.000125	1.73	11038	1171	404	74	[Nr4a2 - nuclear receptor subfamily 4, group a, member 2, Axl - axl receptor tyrosine kinase, Niacr1 - niacin receptor 1, Ahr - aryl-hydrocarbon receptor, Aif1 - allograft inflammatory factor 1, Spink2 - serine peptidase inhibitor, kazal type 2, Ctsh - cathepsin h, Pim1 - proviral integration site 1, Ndnf - neuron-derived neurotrophic factor, Cd24a - cd24a antigen, Gadd45b - growth arrest and dna…
GO:0009966	regulation of signal transduction	1.57e-06	0.000128	1.54	11038	1862	404	105	[Trim25 - tripartite motif-containing 25, Avpi1 - arginine vasopressin-induced 1, Itgal - integrin alpha l, Nr4a2 - nuclear receptor subfamily 4, group a, member 2, Stmn1 - stathmin 1, Ctsh - cathepsin h, Areg - amphiregulin, Gadd45b - growth arrest and dna-damage-inducible 45 beta, Arg1 - arginase, liver, Glrx - glutaredoxin, Gpnmb - glycoprotein (transmembrane) nmb, Cish - cytokine inducible sh…
GO:0043067	regulation of programmed cell death	1.64e-06	0.000133	1.77	11038	1067	404	69	[Nr4a2 - nuclear receptor subfamily 4, group a, member 2, Axl - axl receptor tyrosine kinase, Niacr1 - niacin receptor 1, Aif1 - allograft inflammatory factor 1, Spink2 - serine peptidase inhibitor, kazal type 2, Ctsh - cathepsin h, Pim1 - proviral integration site 1, Ndnf - neuron-derived neurotrophic factor, Cd24a - cd24a antigen, Gadd45b - growth arrest and dna-damage-inducible 45 beta, Glrx -…
GO:0071345	cellular response to cytokine stimulus	1.77e-06	0.000142	2.54	11038	334	404	31	[Rab20 - rab20, member ras oncogene family, Trim25 - tripartite motif-containing 25, Axl - axl receptor tyrosine kinase, Nfil3 - nuclear factor, interleukin 3, regulated, Ybx3 - y box protein 3, Gbp9 - guanylate-binding protein 9, Ccl6 - chemokine (c-c motif) ligand 6, Nfkbia - nuclear factor of kappa light polypeptide gene enhancer in b cells inhibitor, alpha, Ccl9 - chemokine (c-c motif) ligand…
GO:0002757	immune response-activating signal transduction	1.83e-06	0.000147	3.51	11038	148	404	19	[Pde4b - phosphodiesterase 4b, camp specific, Icosl - icos ligand, Nfkbid - nuclear factor of kappa light polypeptide gene enhancer in b cells inhibitor, delta, Nfkbia - nuclear factor of kappa light polypeptide gene enhancer in b cells inhibitor, alpha, Tnf - tumor necrosis factor, Clec2i - c-type lectin domain family 2, member i, Cd14 - cd14 antigen, Scimp - slp adaptor and csk interacting memb…
GO:0002824	positive regulation of adaptive immune response based on somatic recombination of immune receptors built from immunoglobulin superfamily domains	1.89e-06	0.000151	4.55	11038	84	404	14	[H2-Q6 - histocompatibility 2, q region locus 6, H2-DMa - histocompatibility 2, class ii, locus dma, Nfkbid - nuclear factor of kappa light polypeptide gene enhancer in b cells inhibitor, delta, Nlrp10 - nlr family, pyrin domain containing 10, Tnf - tumor necrosis factor, Il6 - interleukin 6, Ccr2 - chemokine (c-c motif) receptor 2, Cd274 - cd274 antigen, H2-Q7 - histocompatibility 2, q region lo…
GO:0050922	negative regulation of chemotaxis	1.9e-06	0.000151	7.45	11038	33	404	9	[Padi2 - peptidyl arginine deiminase, type ii, Rin3 - ras and rab interactor 3, Slamf8 - slam family member 8, Dusp1 - dual specificity phosphatase 1, Aif1 - allograft inflammatory factor 1, Thbs1 - thrombospondin 1, Sema4d - sema domain, immunoglobulin domain (ig), transmembrane domain (tm) and short cytoplasmic domain, (semaphorin) 4d, Stap1 - signal transducing adaptor family member 1, Cxcl13 …
GO:0002521	leukocyte differentiation	1.95e-06	0.000153	2.95	11038	222	404	24	[Irf4 - interferon regulatory factor 4, Tnfsf9 - tumor necrosis factor (ligand) superfamily, member 9, Batf3 - basic leucine zipper transcription factor, atf-like 3, Bcl3 - b cell leukemia/lymphoma 3, Axl - axl receptor tyrosine kinase, Ahr - aryl-hydrocarbon receptor, Itpkb - inositol 1,4,5-trisphosphate 3-kinase b, Tnf - tumor necrosis factor, Pparg - peroxisome proliferator activated receptor …
GO:0006950	response to stress	1.97e-06	0.000154	1.53	11038	1894	404	106	[Trim25 - tripartite motif-containing 25, Mcm5 - minichromosome maintenance deficient 5, cell division cycle 46 (s. cerevisiae), Slamf7 - slam family member 7, Nr4a2 - nuclear receptor subfamily 4, group a, member 2, Itgax - integrin alpha x, Mefv - mediterranean fever, Ndnf - neuron-derived neurotrophic factor, Arg1 - arginase, liver, Ptafr - platelet-activating factor receptor, Slc15a3 - solute…
GO:0051272	positive regulation of cellular component movement	1.97e-06	0.000154	2.36	11038	405	404	35	[Clec7a - c-type lectin domain family 7, member a, Itgax - integrin alpha x, Stmn1 - stathmin 1, Adam8 - a disintegrin and metallopeptidase domain 8, Icam1 - intercellular adhesion molecule 1, Cxcr4 - chemokine (c-x-c motif) receptor 4, Aif1 - allograft inflammatory factor 1, Ccr2 - chemokine (c-c motif) receptor 2, Ctsh - cathepsin h, Cxcl10 - chemokine (c-x-c motif) ligand 10, Gpnmb - glycoprot…
GO:0048002	antigen processing and presentation of peptide antigen	1.99e-06	0.000154	6.51	11038	42	404	10	[H2-Q7 - histocompatibility 2, q region locus 7, H2-Aa - histocompatibility 2, class ii antigen a, alpha, H2-Ab1 - histocompatibility 2, class ii antigen a, beta 1, H2-Q6 - histocompatibility 2, q region locus 6, H2-DMa - histocompatibility 2, class ii, locus dma, H2-DMb1 - histocompatibility 2, class ii, locus mb1, Cd74 - cd74 antigen (invariant polypeptide of major histocompatibility complex, c…
GO:0019730	antimicrobial humoral response	1.99e-06	0.000153	6.51	11038	42	404	10	[Cxcl1 - chemokine (c-x-c motif) ligand 1, Bcl3 - b cell leukemia/lymphoma 3, Cxcl2 - chemokine (c-x-c motif) ligand 2, Rpl39 - ribosomal protein l39, Lgals3 - lectin, galactose binding, soluble 3, Cxcl3 - chemokine (c-x-c motif) ligand 3, Cxcl10 - chemokine (c-x-c motif) ligand 10, Rnase6 - ribonuclease, rnase a family, 6, Rps19 - ribosomal protein s19, Cxcl13 - chemokine (c-x-c motif) ligand 13]
GO:0032652	regulation of interleukin-1 production	2.04e-06	0.000156	4.87	11038	73	404	13	[Il1r2 - interleukin 1 receptor, type ii, Errfi1 - erbb receptor feedback inhibitor 1, Mefv - mediterranean fever, Nlrp10 - nlr family, pyrin domain containing 10, Ffar4 - free fatty acid receptor 4, Tnf - tumor necrosis factor, Lpl - lipoprotein lipase, Tnfaip3 - tumor necrosis factor, alpha-induced protein 3, Il6 - interleukin 6, Nlrp3 - nlr family, pyrin domain containing 3, Lilra5 - leukocyte…
GO:0030335	positive regulation of cell migration	2.04e-06	0.000155	2.39	11038	388	404	34	[Clec7a - c-type lectin domain family 7, member a, Itgax - integrin alpha x, Adam8 - a disintegrin and metallopeptidase domain 8, Icam1 - intercellular adhesion molecule 1, Cxcr4 - chemokine (c-x-c motif) receptor 4, Aif1 - allograft inflammatory factor 1, Ccr2 - chemokine (c-c motif) receptor 2, Ctsh - cathepsin h, Cxcl10 - chemokine (c-x-c motif) ligand 10, Gpnmb - glycoprotein (transmembrane) …
GO:0048585	negative regulation of response to stimulus	2.06e-06	0.000156	1.75	11038	1095	404	70	[Samsn1 - sam domain, sh3 domain and nuclear localization signals, 1, Nr4a2 - nuclear receptor subfamily 4, group a, member 2, Mefv - mediterranean fever, Stmn1 - stathmin 1, Nfkbia - nuclear factor of kappa light polypeptide gene enhancer in b cells inhibitor, alpha, Aif1 - allograft inflammatory factor 1, Cd24a - cd24a antigen, Arg1 - arginase, liver, Glrx - glutaredoxin, Il1rl1 - interleukin 1…
GO:0042325	regulation of phosphorylation	2.08e-06	0.000157	1.77	11038	1032	404	67	[Slfn1 - schlafen 1, Avpi1 - arginine vasopressin-induced 1, Samsn1 - sam domain, sh3 domain and nuclear localization signals, 1, Axl - axl receptor tyrosine kinase, Aif1 - allograft inflammatory factor 1, Sdc4 - syndecan 4, Areg - amphiregulin, Pim1 - proviral integration site 1, Cd24a - cd24a antigen, Gadd45b - growth arrest and dna-damage-inducible 45 beta, Hsp90aa1 - heat shock protein 90, al…
GO:0098609	cell-cell adhesion	2.13e-06	0.000159	3.22	11038	178	404	21	[Itgal - integrin alpha l, Selplg - selectin, platelet (p-selectin) ligand, Itgax - integrin alpha x, Flrt3 - fibronectin leucine rich transmembrane protein 3, Adam8 - a disintegrin and metallopeptidase domain 8, Icam1 - intercellular adhesion molecule 1, Tnf - tumor necrosis factor, Slc7a11 - solute carrier family 7 (cationic amino acid transporter, y+ system), member 11, Thbs1 - thrombospondin …
[truncated: 258 more rows]
