# Supplementary material for: PAD4 deletion in synovial macrophages exacerbates pathology in inflammatory arthritis
Source: Research Square preprint supplement (doi:10.21203/rs.3.rs-9653857/v1), 2026-06-11
Supplement: Supplementary file 4 [file 9509804999faed7fe0404b31.xlsx]

## Sheet: Sheet1
Symbol	Gene_Symbol	B6_MAC1_1	B6_MAC2_1	B6_MAC3_1	B6_MAC4_1	B6_MAC1_2	B6_MAC2_2	B6_MAC3_2	B6_MAC4_2	B6_MAC1_3	B6_MAC2_3	B6_MAC3_3	B6_MAC4_3	B6_MAC1_4	B6_MAC2_4	B6_MAC3_4	B6_MAC4_4
ENSMUSG00000060586	H2-Eb1	3.99502	3795.57	10.5876	2403.92	6.94301	3912.42	7.77508	2534.07	8.27871	3583.02	10.4056	3071.49	14.4916	4497.3	12.6301	6590.82
ENSMUSG00000036594	H2-Aa	2.15254	1626.61	3.73129	1147.56	3.61376	1843.84	4.29951	1303.79	4.88272	1567.55	4.72092	1391.18	6.86294	1938.71	8.40777	2743.97
ENSMUSG00000024610	Cd74	13.6457	5385.71	22.8324	4274.33	15.7077	5917.39	24.3596	4581.1	23.4379	4943.66	31.9876	5150.81	31.8965	6035.46	39.3223	10381.1
ENSMUSG00000073421	H2-Ab1	9.73781	2867.53	9.29505	1974.17	9.29601	3149.15	10.9601	2118.1	12.0561	2686.03	9.43013	2346.76	16.1397	3410.15	15.2876	4988.9
ENSMUSG00000044206	Vsig4	1539.43	111.59	203.361	10.2959	1408.12	64.2122	153.086	6.073	1205.42	56.6925	149.436	6.51786	1306.62	41.9657	134.712	1.6227
ENSMUSG00000032484	Ngp	0.099251	12.4202	11.0977	43.698	5.02164	0.107426	26.6639	19.3256	0	0	26.4311	0.116962	32.5952	7.23474	4157.52	6.11502
ENSMUSG00000038357	Camp	0.160006	11.3924	2.7062	12.7196	0.610987	0.346372	13.2633	14.4597	0	0	5.7107	0.188558	9.53946	2.69155	1555.49	1.06166
ENSMUSG00000056071	S100a9	0.941103	15.6094	6.96368	19.7308	2.91982	0.381984	16.9179	21.3714	0.442198	0.344907	19.7009	0.970408	16.2856	4.28751	2642.28	5.79829
ENSMUSG00000056054	S100a8	4.19073	18.3495	6.36978	13.8898	2.35329	0.667048	12.3097	14.6985	2.20077	1.92737	17.822	2.32402	19.0562	3.80118	2565	5.60792
ENSMUSG00000033208	S100b	129.948	9.25755	1.91983	0.71395	126.159	5.83838	1.38758	0.456851	107.448	5.27168	2.54296	0.288937	119.172	3.13148	0.983109	0.154936
ENSMUSG00000061100	Retnla	63.8874	1308.18	648.321	6155.39	111.91	3048.52	771.124	11117.1	83.6718	1599.4	298.27	6276.85	56.5651	856.147	319.396	3371.2
ENSMUSG00000032496	Ltf	0	2.20949	0.753048	2.33371	0.38254	0.08032	2.91999	1.52097	0.0418416	0.0145048	1.90149	0	2.09962	0.693491	321.068	0.478306
ENSMUSG00000027398	Il1b	17.7624	586.621	9.77885	99.6999	21.8763	455.13	11.1433	107.634	18.808	410.66	9.75307	242.34	38.7796	914.469	17.705	1224.04
ENSMUSG00000027848	Olfml3	77.3897	7.90838	5.45138	0.687542	81.7032	9.17599	5.88401	1.28843	64.337	6.692	5.92674	0.940747	66.0337	4.59177	4.83516	0.767339
ENSMUSG00000030147	Clec4b1	1.36467	49.226	4.32764	56.7005	1.38417	55.4826	8.51811	59.199	1.92366	62.9342	4.37102	92.9731	1.55136	65.7588	2.99242	130.727
ENSMUSG00000026822	Lcn2	0	1.13098	0.24627	1.14479	0.125102	0	1.26515	1.50578	0.0410505	0.298841	1.43913	0.0514775	0.838681	0.612341	154.485	0.310541
ENSMUSG00000052336	Cx3cr1	85.2567	33.1403	1.57919	2.65758	93.6756	39.6749	2.28402	2.91356	74.0118	26.291	1.27522	2.06832	67.7927	26.5915	1.09827	1.63339
ENSMUSG00000099974	Bcl2a1d	3.51346	44.4219	0.396157	16.2056	6.30562	59.3248	1.68428	19.6398	3.83004	48.0725	1.15751	33.289	5.68055	62.9107	1.54966	94.4476
ENSMUSG00000040950	Mgl2	4.94277	82.9688	47.3101	166.515	6.56399	99.342	43.2426	188.699	9.14538	81.3693	32.7088	143.057	7.63628	119.647	32.1726	266.781
ENSMUSG00000079547	H2-DMb1	10.8207	212.24	11.3635	166.508	10.606	264.116	10.2866	178.279	11.1475	238.536	9.69067	265.602	14.6765	322.188	12.761	521.389
ENSMUSG00000040809	Chil3	1.69588	10.1568	1.37369	5.15958	0.725731	4.3041	2.56973	3.32337	1.04414	6.11525	2.83636	3.10112	9.69117	10.2742	374.816	2.27264
ENSMUSG00000044258	Ctla2a	64.8383	3.90709	8.30016	3.47251	35.6706	1.72101	2.64663	0.822976	59.2712	2.67627	7.84143	1.04099	62.7517	3.21954	9.29765	0.837308
ENSMUSG00000020092	Pald1	60.4153	3.39804	10.0256	1.28905	71.5443	5.1908	14.2553	0.925318	51.0415	4.63149	14.5688	3.21035	52.2175	7.42545	10.2974	1.66768
ENSMUSG00000046908	Ltb4r1	0.348019	18.678	0.163502	13.0728	0.33223	8.38126	0.086892	7.61943	1.3082	20.5775	0.47773	47.8817	2.37379	45.2076	17.443	107.375
ENSMUSG00000049103	Ccr2	10.6345	108.04	4.24988	81.6884	6.95155	96.1736	3.0142	71.6974	11.1015	106.792	4.47582	86.7692	9.87593	112.407	4.41659	112.965
ENSMUSG00000030214	Plbd1	0.824901	48.0541	0.296358	22.5719	0.949602	38.8652	0.605759	21.1568	1.18559	40.6887	0.688292	39.3129	4.1678	95.3643	11.5036	145.985
ENSMUSG00000037649	H2-DMa	12.7118	229.979	15.0983	200.459	12.5553	308.532	14.6738	235.576	16.4966	268.205	11.1798	310.043	14.9583	261.967	14.1767	450.304
ENSMUSG00000051379	Flrt3	0.58759	14.303	0.12741	8.37073	0.215743	12.622	0.346079	6.45683	0.679612	19.9666	0.441213	17.9325	0.608983	39.4382	0.664525	74.0472
ENSMUSG00000000682	Cd52	11.522	201.494	3.17463	108.826	11.082	192.974	3.28775	91.6063	10.5835	200.913	4.83611	260.842	15.4948	258.506	41.597	474.384
ENSMUSG00000017737	Mmp9	0.234231	10.1579	11.9948	22.8761	0.223604	8.92407	17.3106	33.475	0.440234	6.22653	18.8203	17.8866	0.473379	8.23048	39.1172	13.5655
ENSMUSG00000056313	1810011O10Rik	78.2135	9.42338	41.1018	2.40663	50.803	5.67283	30.9362	3.75605	57.4619	5.84456	36.7721	3.08818	49.2268	1.82104	26.6057	0.827984
ENSMUSG00000044162	Tnip3	0.931479	28.4684	0.3472	10.7463	1.10968	24.3386	0.822637	7.9609	1.02004	23.1875	0.711536	21.328	1.17463	33.8414	0.887429	52.3478
ENSMUSG00000031494	Cd209a	2.20353	14.8164	12.0825	31.5372	2.53579	22.3475	9.79752	39.9334	2.83665	15.2223	9.06062	23.2284	3.47725	50.2687	9.22878	142.144
ENSMUSG00000022415	Syngr1	44.7555	7.49942	11.1439	2.62513	52.3639	6.98225	11.6046	1.9411	44.1109	7.67508	9.86357	2.64418	37.6945	3.65083	10.503	0.588674
ENSMUSG00000047139	Cd24a	0.851664	4.46852	0.32737	7.30458	0.258689	5.94991	0.579927	4.58037	1.055	6.16689	1.02738	29.5617	1.4865	18.342	17.0356	68.471
ENSMUSG00000038400	Pmepa1	24.2652	2.99293	4.70786	0.669197	20.3182	3.47348	2.60534	0.655824	19.6706	2.04367	2.38735	0.658763	26.6121	1.68333	2.11692	0.412122
ENSMUSG00000032911	Cspg4	19.4477	1.39217	2.30867	0.246144	16.322	0.975932	4.26046	0.315011	16.47	0.710471	4.17215	0.451587	20.2612	1.23761	2.75671	0.219006
ENSMUSG00000089929	Bcl2a1b	35.6283	81.3546	3.48719	29.4378	32.5947	88.3736	5.48558	25.5863	27.4827	76.1687	5.02659	56.1563	31.952	72.8344	5.05954	87.1012
ENSMUSG00000050370	Ch25h	47.4358	5.91203	13.5065	1.88356	47.1704	7.00133	12.7408	4.18498	32.6733	4.0389	9.53715	1.05872	23.6037	2.68668	5.58357	0.596101
ENSMUSG00000022817	Itgb5	52.7488	21.6241	14.6029	6.72382	103.51	27.0137	13.7385	6.13338	69.731	19.078	14.4623	5.98264	100.813	22.9872	11.7539	2.5768
ENSMUSG00000096606	Tpbgl	40.6958	4.54606	12.5953	3.26055	45.5159	2.78015	13.3473	3.14081	43.7124	4.51069	16.3073	1.70264	44.8946	3.5256	13.3969	1.67384
ENSMUSG00000073599	Ecscr	14.3634	0.788953	0.549741	0.204438	13.3487	0.696587	0.204509	0.0817616	12.7007	0.714743	0.374794	0.137894	12.6815	0.601441	0.234593	0.166371
ENSMUSG00000076431	Sox4	16.3905	2.45581	1.18833	0.375632	18.303	1.61527	1.33884	0.518432	18.493	0.988805	1.27312	0.506729	14.9523	1.63102	1.19169	0.407583
ENSMUSG00000027702	Lrrc34	26.8096	1.45301	8.37684	0.504258	20.0828	0.833051	9.92848	1.49385	18.6847	1.69243	8.39342	0.680246	18.0823	1.13884	8.03661	0.486356
ENSMUSG00000026832	Cytip	1.06145	14.428	0.241466	5.0657	0.533312	10.6665	0.368237	4.5177	1.13399	12.4812	0.541926	10.7311	3.13874	33.4133	1.78083	59.6152
ENSMUSG00000015957	Wnt11	0.135294	3.80804	0.104011	0.956249	0.0821898	3.3947	0.0737009	0.939616	0.161816	4.59179	0.101301	5.4933	0.298285	26.3217	0.616458	44.6979
ENSMUSG00000021728	Emb	13.9965	152.85	38.3411	191.444	8.01686	134.13	29.8921	161.091	23.372	185.297	38.6725	197.865	23.2278	231.417	55.4196	296.004
ENSMUSG00000026833	Olfm1	0.179592	6.31597	4.4887	18.5857	0.525762	12.337	2.25993	7.6408	0.596324	10.3438	1.93936	23.238	1.81478	22.4339	2.43636	24.5586
ENSMUSG00000040616	Tmem51	3.42831	19.8179	0.425455	9.83218	1.54376	14.4928	0.839817	7.59323	3.28253	11.5688	0.0591961	12.8063	4.77158	23.092	1.42651	21.5209
ENSMUSG00000021665	Hexb	1283.43	309.096	238.157	109.845	1386.16	311.365	253.961	105.042	1158.86	259.976	226.824	110.198	1076.95	225.319	199.671	126.193
ENSMUSG00000020399	Havcr2	61.5199	15.1717	11.0012	3.59085	63.6448	15.0471	8.2566	3.3993	49.6098	11.8488	11.2641	4.57193	57.1719	17.2218	8.26414	6.54489
ENSMUSG00000029378	Areg	1.2977	14.6455	1.68831	8.89459	1.33411	11.1287	2.09356	16.7399	1.78235	19.8043	2.00974	34.9378	1.7148	20.2434	4.20269	43.241
ENSMUSG00000031495	Cd209d	7.24201	44.3261	58.9504	141.378	8.87832	88.9469	53.2931	187.141	14.6859	45.3718	31.3933	85.972	16.1767	46.734	58.6875	122.983
ENSMUSG00000034353	Ramp1	2.3396	16.8261	0.381043	6.34938	2.68014	18.9417	0.311542	7.06216	2.40383	14.3898	0.742235	12.6826	1.92285	13.7599	0.96937	18.2438
ENSMUSG00000004655	Aqp1	142.984	28.6882	200.983	44.7677	162.985	27.934	333.181	40.8621	199.275	35.6907	466.025	46.4092	191.978	34.9913	379.034	21.7059
ENSMUSG00000002504	Slc9a3r2	64.2751	5.53474	35.961	10.6618	74.1966	5.41518	37.4585	13.538	51.2685	4.36012	36.0157	10.2145	45.9511	3.66299	29.4202	4.28919
ENSMUSG00000016529	Il10	4.62919	77.4053	9.56926	36.8804	4.86108	66.1386	5.45536	38.2974	5.04629	67.048	9.99781	33.1679	7.29734	52.6921	12.065	18.5168
ENSMUSG00000024675	Ms4a4c	0.656539	17.5177	0.534643	5.23825	0.417835	11.8437	0.305988	3.91464	1.11056	16.3833	0.16022	2.83688	1.32686	16.7296	1.44788	13.442
ENSMUSG00000030789	Itgax	0.0196987	3.31509	0	2.99421	0.131635	5.84203	0.137712	2.62437	0.407258	4.54341	0.0901353	10.748	0.318487	12.5918	0.256702	25.0016
ENSMUSG00000002204	Napsa	0.631417	14.0206	0.519129	8.59553	0.703231	17.3989	0.656874	6.91203	1.82956	19.9012	0.842677	20.2454	3.56242	38.896	5.72286	68.1794
ENSMUSG00000027863	Cd2	2.22501	13.9312	4.75522	24.239	1.99911	17.8968	4.44425	24.4686	3.2389	16.5008	2.99441	41.0787	1.85159	14.9631	3.14878	39.8646
ENSMUSG00000038235	F11r	74.513	19.6621	10.8924	3.10241	85.781	23.0275	11.2093	2.30983	60.8295	20.203	11.5285	7.93602	67.5761	30.0581	8.49701	12.2267
ENSMUSG00000030162	Olr1	19.3722	7.56624	0.423805	3.21121	15.2209	4.8087	0.360364	2.26914	11.1052	7.51576	0.577872	11.8796	17.2055	7.48182	1.46942	8.18717
ENSMUSG00000001281	Itgb7	2.67771	13.5088	3.40404	14.2414	1.80439	14.4062	3.46079	6.97044	3.81156	14.5472	4.93701	27.2861	4.93415	64.6209	5.28942	115.858
ENSMUSG00000026073	Il1r2	0	3.63545	0.253318	2.38454	0.193024	3.64754	0.201935	1.82097	0.253352	3.85339	0.277559	3.37561	0.578906	24.8797	11.2491	36.7662
ENSMUSG00000037548	H2-DMb2	0.187052	5.36759	0.386667	3.00661	0.464271	4.13018	0.18681	3.24136	0.5625	4.71646	0.479302	10.6248	0.642654	10.803	0.525012	31.8788
ENSMUSG00000110110	NoGeneName	0.568877	2.08657	2.67264	8.24941	0.543068	6.7731	3.29521	14.2038	0.42768	3.8918	1.66593	15.0167	0.689819	3.1898	1.82481	17.363
ENSMUSG00000022534	Mefv	0.1522	8.80476	0.125134	1.79492	0.254266	7.96917	0.114002	2.39283	0.125151	5.54084	0.121874	3.04912	0.672866	19.8241	0.648415	17.4382
ENSMUSG00000028195	Cyr61	16.4596	3.36983	46.1151	4.9328	14.6233	3.12095	23.3376	6.54798	19.5324	2.75931	43.4845	6.44199	25.3735	4.09813	41.7303	4.3844
ENSMUSG00000043391	2510009E07Rik	60.8772	7.24637	8.18738	3.18015	56.8596	5.8723	11.2824	2.69139	50.2345	7.18451	13.0681	6.42121	57.6952	12.2256	9.1819	9.10527
ENSMUSG00000005824	Tnfsf14	0.130484	12.0353	0.551722	6.72519	0.373691	15.4649	0.781888	5.5312	0.85835	9.37297	0.417939	5.15123	0.593341	12.9258	0.915594	5.81305
ENSMUSG00000035914	Cd276	28.2982	5.47976	5.04386	1.91771	32.2764	5.93157	8.80171	3.06036	25.1023	4.94866	9.07708	2.96467	26.474	5.24118	5.78254	1.00245
ENSMUSG00000051906	Cd209f	5.82876	32.0778	37.147	103.866	7.49972	77.9924	39.4619	161.12	13.5152	56.4905	29.2411	88.7229	11.7159	26.5647	34.4643	19.8176
ENSMUSG00000040152	Thbs1	2.68403	70.0548	0.945736	16.3965	2.31315	34.3167	2.02903	9.08194	3.52072	49.0199	0.801699	18.4507	20.9631	137.678	30.3991	32.0488
ENSMUSG00000018927	Ccl6	96.4163	513.712	298.537	995.685	72.9191	413.334	215.687	782.12	126.069	724.398	247.458	1182.13	161.197	539.814	471.217	1052.18
ENSMUSG00000069515	Lyz1	482.452	891.14	240.364	1394.45	402.581	1165.27	248.58	1421.91	442.02	1123.63	231.732	2768.65	484.123	892.586	279.802	3148.64
ENSMUSG00000037820	Tgm2	39.364	7.58521	3.46808	2.72453	42.969	9.16848	3.7046	2.08039	29.2399	8.20641	4.37418	4.02336	37.241	13.3661	3.14489	4.77552
ENSMUSG00000023078	Cxcl13	0.316395	24.0063	1.78374	7.64684	2.0136	28.4239	0	9.13782	0.49555	13.8117	0.482577	2.85855	2.87744	12.1229	3.27731	3.09898
ENSMUSG00000037185	Krt80	2.05104	17.1847	1.54175	21.7992	2.28431	21.9778	2.3215	21.7836	2.24869	19.1096	3.00318	25.7011	4.21422	27.0902	3.08399	45.8812
ENSMUSG00000053318	Slamf8	0.271244	8.52759	1.05587	7.00693	0.184955	12.2048	2.08974	7.97821	0.400557	10.7929	0.602835	8.21946	0.274091	8.07532	0.466113	11.8268
ENSMUSG00000028773	Fabp3	24.0211	6.51815	5.12341	1.4161	24.0568	4.62573	5.15123	2.47133	20.2194	4.60882	3.10186	2.25766	18.7634	2.34125	3.98858	0.698435
ENSMUSG00000098188	Sowahc	7.0357	24.5799	1.14419	8.841	6.81982	22.4064	2.08095	8.72292	6.10316	21.3952	2.50117	14.9879	6.04312	27.8176	2.25144	35.4224
ENSMUSG00000030142	Clec4e	4.81123	35.0409	1.98489	13.6542	4.86131	31.6799	2.51881	10.0947	5.84224	31.321	2.59473	21.884	7.83234	39.2351	5.8776	31.5195
ENSMUSG00000079168	Cd209g	2.48491	16.8255	15.6982	51.1739	3.30589	37.3682	18.243	74.5744	5.3411	21.4692	11.9992	35.981	5.95693	11.0676	14.5215	8.39415
ENSMUSG00000032487	Ptgs2	0.781506	9.40982	0.426377	4.38248	0.770115	8.62251	0.503544	1.87894	0.710725	13.2552	0.945895	5.91198	0.891608	20.9443	0.93502	20.3353
ENSMUSG00000027399	Il1a	5.22249	57.3336	6.75454	23.0793	4.28171	47.948	8.16107	19.1759	7.85249	62.9894	5.79141	49.4525	7.69867	66.95	4.68081	78.7381
ENSMUSG00000038352	Arl5c	2.1278	20.9322	1.28528	6.06315	1.93454	19.3568	1.21431	5.33349	1.23784	14.8042	1.39089	9.97028	3.02043	20.3111	1.77745	17.4797
ENSMUSG00000025473	Adam8	1.28223	10.1887	2.1962	8.77531	0.580554	6.47136	1.083	3.94556	2.21026	12.1877	2.56813	24.0731	2.49514	22.2881	5.44981	45.6016
ENSMUSG00000003484	Cyp4f18	15.0437	62.9444	8.06593	40.6501	16.349	63.7516	7.04526	37.5725	12.1804	62.9629	5.40574	45.8229	14.6434	51.9064	6.26207	40.12
ENSMUSG00000034765	Dusp5	4.41392	60.2086	3.27183	29.5615	5.94594	45.0677	6.46536	24.0336	7.28197	55.6477	8.34801	45.7737	11.3489	84.928	10.0291	113.847
ENSMUSG00000037712	Fermt2	16.1851	1.09594	6.35649	0.584915	15.3847	0.549791	8.85455	1.61329	12.4109	0.902593	7.92352	1.00672	13.322	1.68301	6.57302	0.722208
ENSMUSG00000042082	Arsb	83.9172	9.90566	16.0557	9.08372	115.114	16.0268	24.6871	12.1238	69.4031	10.4002	21.6198	8.31264	76.8099	13.5252	14.66	12.0467
ENSMUSG00000038179	Slamf7	2.13209	26.7071	6.48217	15.5408	1.90572	29.3094	7.13392	20.1672	3.49676	24.3277	5.4558	18.9802	2.08586	19.722	3.87971	24.4831
ENSMUSG00000046186	Cd109	46.3063	7.94443	19.9428	3.85114	47.7125	7.91663	26.2668	5.32069	41.5545	8.20902	30.411	6.80887	46.2524	10.0813	21.8783	4.46363
ENSMUSG00000030787	Lyve1	455.138	75.2817	673.003	158.481	515.99	83.0283	561.35	228.007	416.948	78.5943	570.703	127.996	456.035	73.3747	572.222	56.1278
ENSMUSG00000003882	Il7r	1.28544	9.09517	0.674957	5.81273	0.794016	10.4349	0.113274	2.50081	1.13692	12.0085	0.726573	11.5393	0.840484	15.0867	1.17485	23.7952
ENSMUSG00000026193	Fn1	33.0229	8.23931	2.01314	6.68414	26.7923	7.19698	3.87488	6.3233	28.1795	8.84488	4.10995	20.8427	41.9483	20.0517	3.82277	28.6185
ENSMUSG00000045312	Lhfpl2	21.0419	5.68068	3.49693	2.3684	23.5314	5.30676	3.04169	1.63751	18.9448	5.8279	3.42538	2.54928	20.1051	5.69248	3.0102	1.45693
ENSMUSG00000036067	Slc2a6	24.74	5.66446	2.08865	2.39317	29.7771	5.48822	2.81999	2.44034	21.883	7.22189	2.90292	9.43031	21.6486	10.1846	2.20415	14.8401
ENSMUSG00000002602	Axl	6.86433	14.6461	0.908192	5.51954	7.19366	14.3752	1.75184	4.5608	4.80229	14.458	1.22033	9.74504	5.59794	20.6582	1.63276	13.0554
ENSMUSG00000029304	Spp1	30.2519	16.177	2.4964	9.36907	33.7341	18.2949	4.80213	3.00671	49.1381	24.1335	4.72849	9.16225	35.313	17.4411	5.29381	9.20811
ENSMUSG00000043953	Ccrl2	22.0157	93.2088	13.4415	46.0446	23.5256	88.4738	10.8203	39.428	21.6444	84.7806	10.346	52.6482	24.0005	80.7682	10.5374	65.0482
ENSMUSG00000028480	Glipr2	1.55418	13.3497	1.62566	10.6565	2.91135	9.14101	2.84076	6.61138	3.44465	17.5106	3.6765	31.6887	4.38553	35.2419	10.7586	61.9007
ENSMUSG00000073412	Lst1	23.0879	176.87	19.7716	111.056	13.9496	158.163	19.5555	100.198	15.9293	156.521	19.2566	86.1008	28.646	105.151	27.8311	34.6272
ENSMUSG00000021298	Gpr132	1.29291	15.3961	0.654144	6.68976	0.996893	12.5947	1.04292	7.04189	1.77577	10.3516	1.36522	10.2551	1.70847	15.9398	1.24619	23.6146
ENSMUSG00000074874	Ctla2b	74.3652	17.7254	31.7925	12.7587	58.6753	15.3473	23.2166	12.8699	65.4808	14.8687	23.8915	7.17146	76.1297	9.89558	29.7692	2.99952
ENSMUSG00000045636	Mtus1	12.6812	2.29327	2.6658	1.06064	11.458	1.21682	3.1519	1.0588	9.71191	1.31845	2.7722	0.674458	11.8311	1.32569	2.85627	0.360371
ENSMUSG00000057135	Scimp	0.786171	13.03	1.61171	6.74285	1.15987	17.1733	1.49893	7.99019	1.67909	17.6018	2.41999	13.4758	1.01108	7.81454	1.57614	5.55505
ENSMUSG00000031722	Hp	0.209473	2.57612	0.708567	0.805148	0.359944	1.08829	0.251041	3.00538	0.629922	0.736993	0.996825	1.48111	6.60415	4.5416	60.3899	0.436817
ENSMUSG00000007891	Ctsd	1125.93	298.31	167.381	219.139	1145.44	246.508	157.283	204.462	957.354	267.67	153.404	221.445	1033.98	199.769	145.867	115.879
ENSMUSG00000046805	Mpeg1	13.6812	39.4482	5.15257	23.5363	6.24982	58.294	8.21488	22.1819	9.78069	29.6674	2.99565	27.4315	12.2982	28.5779	3.33743	41.344
ENSMUSG00000022103	Gfra2	1.71662	5.48001	14.3851	18.7601	1.57185	8.22839	15.5695	22.9775	3.81897	8.42262	15.0042	22.5414	2.90287	10.935	15.1709	26.1338
ENSMUSG00000052305	Hbb-bs	2.90239	40.0395	1.81809	8.68192	0.671687	43.3141	6.93914	1.72073	2.3969	1.37529	5.39268	2.48749	4.88809	11.1783	2.73308	1.91743
ENSMUSG00000027368	Dusp2	5.11103	50.6709	6.86745	17.1003	6.34288	55.8735	9.80046	14.904	8.35732	45.7548	6.12728	17.0453	7.79866	52.0151	5.73819	26.4515
ENSMUSG00000032915	Adgre4	0.625358	9.81956	0.718174	7.40529	0.431156	6.76869	0.277577	5.17878	1.92627	8.18288	0.476909	6.96008	6.91604	16.0065	1.32339	20.9771
ENSMUSG00000018593	Sparc	157.215	18.2254	14.1971	22.454	155.726	22.5364	18.76	38.229	118.2	29.369	16.9501	27.8158	143.396	38.4748	34.0494	29.599
ENSMUSG00000038067	Csf3	1.03002	16.2045	2.82282	5.69867	0.901346	18.8598	3.17177	8.87643	1.61326	10.6537	2.82784	11.1267	2.34187	15.0805	2.92544	11.4718
ENSMUSG00000030745	Il21r	13.5011	3.01409	2.53717	1.17941	14.1774	3.40974	2.64053	0.873489	9.69189	2.84054	2.55688	0.773416	10.649	2.75124	1.84209	1.11976
ENSMUSG00000019997	Ctgf	6.30652	2.20109	15.6639	0.384832	5.02438	3.53848	20.0065	2.93773	9.17304	1.20097	18.375	2.04923	5.76357	2.90348	13.5732	1.62631
ENSMUSG00000079293	Clec7a	17.5023	31.4981	4.85844	19.0893	19.0195	41.3746	6.5574	19.9762	17.4503	38.3613	4.11223	29.2818	17.8726	34.9371	3.90793	44.324
ENSMUSG00000009545	Kcnq1	0.201872	1.67688	1.32778	4.6027	0.15417	1.6606	1.0887	6.33808	0.322504	3.33423	1.38556	6.8038	0.22439	3.3958	0.647552	9.45263
ENSMUSG00000053101	Gpr141	0.176645	5.56441	0.0331958	1.97519	0.202357	7.45664	0	2.10651	0.597605	6.07684	0.0969933	3.08087	0.678298	12.7112	2.05404	11.1848
ENSMUSG00000073940	Hbb-bt	0.862622	24.5674	1.13475	2.41138	0.494091	15.3123	2.58451	1.92878	0.648515	2.36054	3.78922	0.609931	2.09203	4.99811	1.38353	2.94356
ENSMUSG00000010307	Tmem86a	150.607	48.8127	39.0955	25.7478	166.458	41.4236	30.345	24.5395	139.062	48.9152	33.7281	28.5378	141.051	35.7656	37.9075	12.8428
ENSMUSG00000026630	Batf3	0.426597	5.06226	1.57252	6.22056	0.501221	6.81948	2.06467	8.62134	0.770946	4.5861	1.29131	9.28099	0.431075	4.66134	2.20393	10.1712
ENSMUSG00000069919	Hba-a1	1.72828	27.857	1.9105	6.66074	0.776409	34.1117	3.95974	0.852432	1.91076	1.88778	2.97717	1.55746	3.80104	8.26567	2.95537	3.37274
ENSMUSG00000036103	Colec12	154.727	22.3318	174.681	41.2383	155.549	30.3094	162.877	45.5788	158.408	27.7957	175.076	27.7078	154.47	21.8363	143.902	14.1194
ENSMUSG00000069917	Hba-a2	2.66178	40.076	1.63112	5.96475	1.76766	36.3261	5.31667	3.01894	1.84886	2.03587	5.08363	2.59124	4.56083	8.65223	2.90023	3.07151
ENSMUSG00000045763	Basp1	10.7035	17.639	5.55306	14.9718	19.0567	38.4514	2.81997	7.34128	11.3545	21.884	3.18495	13.5421	27.2719	30.8061	2.83045	10.2701
ENSMUSG00000027533	Fabp5	4.33467	30.07	3.96504	25.8794	3.37069	25.7579	3.03894	16.4745	6.04278	41.6619	3.62532	34.5055	5.2214	27.8733	6.47456	28.6249
ENSMUSG00000029096	Htra3	13.4637	3.12464	0.58319	0.458779	13.9923	3.72069	1.3033	0.948911	11.2616	3.07959	1.04861	1.55662	12.029	4.72949	2.1377	1.99121
ENSMUSG00000089901	Gm8113	0.0891471	2.5966	0.251293	5.45132	0.127654	2.60524	0.667737	8.513	0.209439	2.96224	0.36712	6.93363	0.360332	2.20773	0.35745	4.35175
ENSMUSG00000075010	AW112010	1.10259	17.6719	4.44005	9.76944	1.20293	12.2751	2.83155	9.09826	1.03615	12.9309	3.31536	3.7124	1.90999	9.56802	3.47365	4.77766
ENSMUSG00000031488	Rab11fip1	0.214596	5.62416	0.0889581	2.47563	0.210885	4.18091	0.14498	1.76407	0.260979	4.33025	0.173282	4.61152	0.414564	10.5641	0.297365	13.8678
ENSMUSG00000056749	Nfil3	11.1347	94.2229	17.0436	78.4952	9.60088	75.8752	25.2299	65.9228	16.7083	76.3502	20.9823	79.4354	17.7848	95.33	23.9435	131.475
ENSMUSG00000035314	Gdpd5	9.0024	1.18054	2.58033	0.6313	10.3088	1.0839	4.35102	0.58671	8.92564	1.70515	4.51604	0.729966	9.10734	2.10326	3.44615	0.890498
ENSMUSG00000029070	Mxra8	10.9554	1.12265	6.34698	0.760329	12.1562	1.04447	5.23437	0.98716	9.03278	1.07253	6.49333	1.00339	9.13926	1.55605	5.74697	0.771198
ENSMUSG00000047959	Kcna3	9.88387	22.7697	3.23549	8.4114	8.8267	21.9482	3.82106	6.65373	9.04862	22.6845	4.37668	16.8327	11.4697	46.2435	4.21879	46.8432
ENSMUSG00000026875	Traf1	0.362359	7.81	0.468159	3.09291	0.425192	6.16092	0.814252	2.90469	0.58173	6.04986	0.607952	4.7506	0.686556	12.2191	0.484313	15.7782
ENSMUSG00000050953	Gja1	6.01541	4.50882	35.8583	6.9951	6.97302	0.422786	25.5909	5.13115	11.3426	5.38266	32.6365	4.6952	14.6438	7.92132	32.6948	4.07274
ENSMUSG00000000253	Gmpr	15.7818	5.83183	6.51324	1.56145	14.5664	3.11436	7.09697	2.19328	13.1511	5.75196	6.38347	1.84953	12.0708	3.34084	6.29303	0.578531
ENSMUSG00000028024	Enpep	3.55981	2.24016	22.8566	5.53174	4.25877	3.34671	21.0691	7.32392	4.81425	2.47548	19.0974	3.72445	4.18518	1.71669	13.0956	1.02742
ENSMUSG00000029413	Naaa	6.64701	31.6677	12.8544	33.2732	7.31938	28.1423	13.3694	34.1029	7.59747	32.5716	12.463	44.2845	8.0289	40.1602	11.9006	77.3498
ENSMUSG00000054675	Tmem119	4.093	18.1186	1.06093	2.79465	4.94027	12.2211	1.50352	1.97236	6.76432	14.8511	1.46383	2.93838	5.65725	9.98027	2.35799	2.36346
ENSMUSG00000025746	Il6	0.785091	4.79935	0.782394	2.82645	0.36338	1.90552	0.736554	4.72104	1.00607	2.53435	0.60961	5.94362	1.46646	6.40313	2.14633	25.5722
ENSMUSG00000053030	Spink2	0.389565	3.57218	0.366042	1.47468	0.743782	3.58406	0.842964	3.14546	0.854214	5.584	0.891269	13.5429	0.196827	5.40023	0.846098	12.6779
ENSMUSG00000034855	Cxcl10	1.47348	11.7003	0.998664	5.40196	1.79864	14.7982	1.73694	11.2747	1.3166	12.5119	0.862122	6.2625	1.31809	8.28467	1.59812	6.47965
ENSMUSG00000024521	Pmaip1	9.90079	50.6844	10.595	34.8362	12.2521	51.5475	15.7017	41.8071	9.34729	50.2623	9.60594	48.8308	11.3479	54.1876	11.3032	130.386
ENSMUSG00000065987	Cd209b	2.79051	12.9932	14.7103	29.9693	2.25257	22.8304	10.9632	41.692	5.03263	11.8112	8.39345	17.9898	4.72732	9.05067	13.5132	9.82168
ENSMUSG00000033192	Lpcat2	40.6215	24.8623	9.47241	5.8175	41.8829	24.6389	8.17589	4.61041	34.7059	19.995	9.95026	6.38157	32.2897	16.9131	9.08503	7.10306
ENSMUSG00000021186	Fbln5	18.3935	3.12005	23.5782	3.70798	20.4789	3.58084	25.2271	8.00596	20.531	3.5383	21.2883	4.53621	17.283	2.2945	16.6442	1.95253
ENSMUSG00000047180	Neurl3	8.481	35.5648	7.18998	21.3906	10.2572	42.6885	8.15159	22.6643	6.08235	34.7123	5.25202	23.7085	8.66668	45.5582	5.14564	34.2107
ENSMUSG00000028111	Ctsk	46.8454	11.9417	133.332	55.708	38.9769	29.8668	123.13	50.8924	61.285	40.8437	169.205	57.946	49.0393	18.5909	143.61	24.1026
ENSMUSG00000003206	Ebi3	6.32339	46.9682	14.4156	34.049	5.34378	40.3923	10.4563	35.2504	7.11136	31.0009	9.86601	24.5542	5.55176	31.6783	16.1065	23.8768
ENSMUSG00000025492	Ifitm3	140.783	564.079	536.525	841.195	96.1435	526.843	369.457	923.955	145.917	616.791	320.7	710.42	173.172	464.243	468.2	548.869
ENSMUSG00000055541	Lair1	26.7582	10.27	10.3218	4.10098	25.9965	10.9924	12.0542	4.28071	22.5621	9.68176	11.1369	4.54775	22.9946	7.0964	9.67423	2.07422
ENSMUSG00000059108	Ifitm6	0.675681	1.39708	2.69825	9.1489	0.537521	3.29102	4.8361	15.4227	1.42868	4.29228	3.14325	10.6831	3.12938	4.78845	33.0755	13.3429
ENSMUSG00000060803	Gstp1	3.36457	37.3335	33.2701	39.189	3.36487	25.3186	28.1617	43.1379	8.28099	31.7863	22.4331	41.7265	10.3616	33.2397	38.8664	28.5508
ENSMUSG00000021556	Golm1	26.1473	4.9629	5.42298	3.05429	29.1292	4.56294	4.6112	2.41575	22.3866	4.57783	6.04719	4.92853	24.7144	7.2384	4.3768	5.59748
ENSMUSG00000002980	Bcam	0.0909692	1.03043	0.491488	5.24486	0.217105	2.31387	1.72617	5.46645	0.363323	1.97814	0.707622	6.61973	0.482602	1.44523	0.775107	6.07901
ENSMUSG00000035678	Tnfsf9	84.209	497.83	144.444	251.266	108.534	593.513	188.585	306.831	95.7218	481.36	141.944	317.461	115.384	575.568	148.364	534.622
ENSMUSG00000044770	Scml4	9.67259	0.975269	1.39873	0.629419	9.95402	0.809295	1.66998	0.848583	8.41905	0.923392	1.11347	1.12144	6.95797	0.781334	1.19922	1.25638
ENSMUSG00000040197	Cd209e	0.403834	4.28388	3.09883	8.40781	0.578267	4.80808	2.95761	11.6004	0.885501	2.69692	1.78623	6.66254	1.08819	2.89336	2.9686	5.42275
ENSMUSG00000103219	Gm37787	0.414648	6.26243	1.75325	5.79557	0.395836	11.4445	3.10583	4.82883	0.974159	10.131	3.79462	7.3296	1.0475	3.48752	1.45478	5.8955
ENSMUSG00000017446	C1qtnf1	1.05571	3.76707	7.59233	13.0709	0.678334	4.26303	7.279	16.6257	1.20196	4.20639	6.59565	8.63688	1.94894	3.90842	5.71868	3.59859
ENSMUSG00000079523	Tmsb10	2.98499	14.18	2.01745	12.1687	2.09967	13.7737	2.45811	12.5875	2.80512	14.6887	2.44414	24.2532	2.54006	20.7015	5.30197	21.0466
ENSMUSG00000028874	Fgr	6.60082	10.7808	0.800289	6.20027	5.70508	8.97292	0.949853	3.26658	5.8429	9.96099	1.14318	12.7638	6.16806	14.9109	2.58979	20.4252
ENSMUSG00000026065	Slc9a4	0.992874	2.67774	0.434291	4.87506	0.686358	3.90953	0.889009	4.65694	0.804351	4.18253	0.391647	7.54479	0.553543	4.2874	0.566276	11.1149
ENSMUSG00000016382	Pls3	15.4083	1.90606	11.6885	2.8436	14.3597	1.23186	11.3664	2.98818	13.6571	2.47349	11.6244	1.94146	14.9427	2.58091	10.5949	1.98406
ENSMUSG00000050493	Fam167b	8.9279	0.908611	3.79871	1.76584	7.55799	0.638142	4.03758	1.88324	6.96524	0.576202	3.5456	0.59553	6.55344	0.550979	3.2083	0.079835
ENSMUSG00000024730	Ms4a8a	1.34343	5.85505	6.36204	13.0501	1.28248	5.87451	6.7621	14.7188	1.31298	6.66978	3.49157	9.75224	1.90054	4.51971	5.17123	8.40442
ENSMUSG00000033777	Tlr13	114.697	34.7216	41.9139	28.8517	102.788	33.2036	38.0281	16.8992	99.3852	38.263	43.5843	20.8286	107.66	40.9276	42.0678	14.2224
ENSMUSG00000097415	AU020206	7.28039	3.96268	0.777362	1.24307	6.53939	4.11913	0.627946	0.493291	6.43742	1.94051	0.60569	1.44292	7.75809	2.69057	0.331727	0.752823
ENSMUSG00000017466	Timp2	1301.2	286.683	704.67	354.013	1591.68	294.19	670.784	378.878	1270.35	279.344	697.12	282.206	1327.57	230.145	578.943	149.942
ENSMUSG00000027962	Vcam1	1.14145	11.179	0.368024	1.03624	1.22854	6.80721	0.357638	0.792359	0.462721	2.86544	0.471089	1.08138	0.915961	5.95063	0.953507	0.721299
ENSMUSG00000021880	Rnase6	4.07299	14.1581	4.57121	16.4065	2.37612	13.7153	5.87559	11.5946	4.57182	14.0426	3.62383	19.9992	3.08681	17.8686	4.30966	38.6068
ENSMUSG00000049871	Nlrc3	6.43779	1.11473	1.88597	0.564981	6.35861	0.909229	2.21987	0.186997	5.42812	0.624814	2.72804	0.473066	5.13819	0.659988	1.95985	0.267764
ENSMUSG00000058427	Cxcl2	55.2268	295.022	90.6066	239.719	45.4089	316.331	111.961	266.685	60.4196	306.601	94.8884	289.276	66.9318	227.941	104.654	174.952
ENSMUSG00000015568	Lpl	23.6378	133.241	37.6658	125.511	22.9151	94.3896	40.0527	70.981	30.8889	127.761	44.2529	158.015	19.9158	92.0499	29.7633	142.663
ENSMUSG00000000318	Clec10a	6.3242	22.9388	41.3127	53.2807	6.71826	32.9338	37.8686	65.4246	9.34657	24.1061	25.4852	32.7855	9.74529	23.3458	29.1534	22.8988
ENSMUSG00000043017	Ptgir	0.864882	2.90756	0.604769	3.68981	0.883246	4.02751	1.18516	6.12757	0.737162	3.79384	0.773083	10.3581	0.95526	7.02997	1.91541	12.5257
ENSMUSG00000037370	Enpp1	8.90192	1.047	2.07147	0.870285	7.87219	1.04352	1.63044	1.27546	7.5018	0.778913	2.14103	0.598371	7.59897	1.30944	2.35811	0.530033
ENSMUSG00000023367	Tmem176a	6.6279	35.7823	9.75857	26.4552	7.75364	48.0232	8.34802	33.6585	6.86807	34.9902	7.09443	27.4941	6.17424	31.9377	6.39181	38.8443
ENSMUSG00000037095	Lrg1	1.70571	1.25901	5.65167	5.3328	1.28551	2.33205	3.22768	2.59277	2.36221	3.42175	6.9011	3.06802	9.34379	5.03379	59.0341	4.68018
ENSMUSG00000025355	Mmp19	2.16961	10.7051	5.58109	14.4167	2.03722	12.2036	4.04942	8.25092	3.07503	16.4069	5.17532	27.2442	3.63001	16.9518	5.06277	18.9469
ENSMUSG00000040592	Cd79b	0.415675	12.0078	1.5189	8.75522	1.14636	9.4482	0.922525	6.23923	1.21529	8.75682	1.1412	4.68079	1.54014	6.25854	1.38893	2.75805
ENSMUSG00000092500	Gm20400	4.74196	10.4278	7.88303	17.6849	4.35271	20.1354	11.8395	24.6379	4.79901	14.9726	10.1813	22.3525	4.23884	18.9191	8.95837	38.3784
ENSMUSG00000046668	Cxxc5	16.5558	2.70783	6.72426	4.19882	21.7187	3.29488	6.24039	2.3385	17.5657	3.44482	7.52658	2.89505	19.7517	3.64339	7.01308	3.03731
ENSMUSG00000024210	Ip6k3	24.7616	4.42372	10.423	3.30664	26.7498	3.8694	8.08567	7.59175	16.5012	3.33968	6.49502	3.40746	18.1154	3.0461	5.42805	1.99328
ENSMUSG00000030246	Ldhb	7.76136	2.97101	0.571318	0.531157	7.61409	4.49068	0.428643	0.733082	6.21813	3.18092	0.360047	1.30662	5.78273	1.93865	1.1473	0.711946
ENSMUSG00000001128	Cfp	79.1893	307.028	254.608	437.688	75.426	220.274	232.265	456.194	114.816	300.551	240.457	494.316	113.653	330.295	246.319	472.153
ENSMUSG00000029372	Ppbp	2.46377	25.129	11.7855	29.2513	2.88653	20.9701	12.4147	18.8846	4.3149	26.596	10.5561	17.8164	5.99775	18.0011	12.1241	12.6321
ENSMUSG00000021458	2010111I01Rik	29.3441	10.6759	18.3857	5.13838	24.8764	10.9264	18.6157	4.542	28.8957	10.7981	21.0589	5.65152	26.118	7.70072	18.6052	4.21926
ENSMUSG00000073902	Gm1966	0.914666	7.40942	3.03147	6.6682	0.730285	9.16207	2.45809	6.27489	0.87518	5.72105	1.82629	4.95826	0.722609	8.43904	1.91711	11.0028
ENSMUSG00000045287	Rtn4rl1	12.1457	1.18777	7.01548	2.79528	12.0545	2.30895	6.94121	3.30168	11.1875	1.34506	6.07704	1.17586	10.048	1.57557	5.31148	0.782722
ENSMUSG00000049001	Ndnf	0.194001	3.47167	0.107227	3.09038	0.108941	4.58252	0.0911761	2.70047	0.246656	3.58008	0.36552	3.76549	0.2191	4.58581	0.217348	9.04295
ENSMUSG00000046245	Pilra	3.04509	16.6683	2.45853	7.99996	3.59598	23.9259	3.08619	10.5703	3.94265	19.7739	2.33256	15.0716	4.03436	21.6275	6.331	22.7701
ENSMUSG00000076617	Ighm	28.2022	150.398	135.711	206.389	33.2724	177.022	131.149	228.928	41.433	133.614	96.1403	127.116	26.1938	122.082	79.439	61.6063
ENSMUSG00000029379	Cxcl3	0.241817	3.94201	0.378693	1.76036	0.230846	3.95512	0.42934	1.47689	0.479742	8.24532	0.66389	12.2536	0.298657	3.84175	0.592537	5.27187
ENSMUSG00000090523	Gypc	35.2583	9.22659	47.0699	16.729	36.0867	10.4448	43.7543	21.2097	34.2352	7.60327	44.0411	12.2828	32.0505	6.22182	37.9181	5.74339
ENSMUSG00000085761	4930455G09Rik	2.31018	7.06121	0.904454	8.57692	1.28647	11.0438	1.34586	6.09812	2.89464	5.07999	0.704715	10.436	2.52897	5.57726	0.964903	8.2116
ENSMUSG00000032261	Sh3bgrl2	4.60085	0.575294	3.10473	0.365377	5.19068	1.32418	2.74649	0.282511	5.03112	0.2657	3.66499	0.320382	5.27255	0.459279	2.28502	0.168494
ENSMUSG00000017417	Plxdc1	7.31308	0.713066	0.436076	0.60199	6.44427	0.684993	0.463498	0.117921	6.83278	0.563526	1.01675	0.0662928	5.96873	1.05143	1.00093	1.73297
ENSMUSG00000029919	Hpgds	57.1457	23.5737	44.08	16.2184	53.8096	18.6621	39.6344	13.4224	57.8153	21.95	40.5514	10.664	52.3472	11.9792	34.8949	3.73513
ENSMUSG00000094777	Hist1h2ap	3.52279	20.3589	2.36434	12.0898	5.76508	25.0566	5.77994	15.0034	5.67518	17.4603	1.61193	12.4542	0.508539	24.2209	19.1699	14.3107
ENSMUSG00000063253	Scoc	19.2025	4.98759	7.60896	3.10962	15.2174	4.26736	6.1187	3.25031	18.8584	4.74021	6.58013	2.85788	17.67	3.04831	6.80961	2.82298
ENSMUSG00000021892	Sh3bp5	89.6045	23.9002	50.4608	18.8515	92.8137	26.5927	53.1583	15.5454	90.0392	25.1351	63.0186	21.9471	80.621	25.3547	49.9811	16.3609
ENSMUSG00000019866	Aim1	1.04696	4.94365	1.37079	5.54003	1.11415	5.30376	1.61983	4.37331	1.42743	5.13282	1.95551	7.73646	1.71701	14.4277	1.70328	21.6292
ENSMUSG00000026981	Il1rn	4.22454	22.7267	3.87775	14.1527	3.60696	24.432	5.19376	9.75502	4.36305	26.3255	5.49923	17.7612	5.22692	21.8115	5.47862	15.568
ENSMUSG00000037337	Map4k1	0.319499	2.62249	0.469889	2.45126	0.0530441	1.29305	0.138733	3.15779	0.287193	2.4437	0.2034	5.33665	0.294779	3.68684	0.779791	7.99246
ENSMUSG00000043263	Pyhin1	1.1326	10.8145	3.30585	9.74666	0.782155	7.64228	3.249	7.34139	1.81167	10.339	3.04331	6.53155	1.3393	9.09817	2.94705	10.4387
ENSMUSG00000027932	Slc27a3	0.0916971	0.544067	0.1436	0.440569	0	0.397001	0.122104	0.840055	0.114896	0.477956	0.111888	2.93563	0.169876	2.95643	0.0919187	11.9946
ENSMUSG00000028927	Padi2	0.501954	5.48269	0.255474	1.86358	0.299488	4.09739	0.250652	2.18234	0.589636	3.22956	0.459359	3.49986	0.781969	7.25137	0.272549	10.4673
ENSMUSG00000023008	Fmnl3	9.47909	2.86914	3.73249	4.31903	24.1687	3.53376	3.05628	1.40568	19.7625	5.54842	9.3534	4.03829	13.1706	7.47237	6.09256	1.71296
ENSMUSG00000031803	B3gnt3	23.7408	5.35352	34.5427	12.277	23.8007	7.17608	31.1244	8.54394	24.8473	8.38073	39.2017	6.83057	23.629	6.1217	31.1605	5.15543
ENSMUSG00000020205	Phlda1	1.78437	11.3799	0.690375	9.12336	1.10221	11.8721	2.30619	9.04543	1.87413	9.23234	1.63295	11.5653	1.85613	10.8881	3.99823	14.0283
ENSMUSG00000027068	Dhrs9	1.38822	5.10401	0.718746	6.06349	1.19	3.25044	0.396119	2.21713	1.59743	5.98064	0.933365	12.4531	1.1165	4.7657	3.09553	16.3004
ENSMUSG00000038155	Gstp2	1.2601	4.75782	17.0202	10.1822	1.65403	8.35387	8.65196	18.49	1.03615	6.61937	10.5227	11.5084	3.97915	2.79681	13.1051	3.88185
ENSMUSG00000028328	Tmod1	8.91125	3.60499	22.2874	7.86088	9.75796	5.74461	24.4087	9.97071	9.77001	3.65012	20.3477	4.4528	8.91651	2.44936	15.304	2.33941
ENSMUSG00000035352	Ccl12	19.8964	76.6018	55.4134	94.3977	12.9658	98.7787	39.6223	107.334	17.6899	90.5881	31.5097	54.1944	15.0488	38.8577	45.0244	14.455
ENSMUSG00000059089	Fcgr4	4.73165	26.9805	3.99227	14.9309	3.04204	18.8133	1.54303	10.4358	6.62444	21.4228	2.91621	10.1278	9.17232	15.0705	7.16302	5.76642
ENSMUSG00000021451	Sema4d	0.248964	4.08522	0.0615607	1.04165	0.187633	4.21226	0.124321	0.671424	0.270904	2.97741	0.323769	0.934216	0.721629	6.00641	0.334943	2.54616
ENSMUSG00000036111	Lmo1	0.163567	1.41162	0.268958	1.60747	0.351328	1.1065	0.285871	3.3906	0.307422	1.07903	0.636168	4.6261	0.289246	5.15896	0.81981	8.79853
ENSMUSG00000043822	Adamtsl5	11.1405	2.01249	9.52969	2.78494	12.115	2.18981	9.84904	3.85135	10.4034	1.49793	9.40969	2.67318	10.6999	1.33414	7.80493	0.796966
ENSMUSG00000036362	P2ry13	112.121	27.8967	95.8843	30.3433	115.278	31.5725	74.986	34.3275	97.3851	21.8029	69.1509	20.297	91.7729	18.6067	60.4042	7.00324
ENSMUSG00000039611	Tmem246	8.23557	1.99981	9.16601	1.03534	10.1538	1.31571	6.03968	2.66136	7.93924	1.9008	7.73138	0.859498	8.84406	0.596399	5.78797	0.403276
ENSMUSG00000034266	Batf	9.52497	63.7074	35.9187	51.6993	16.9733	73.404	44.1386	55.4916	12.8895	64.6656	25.2203	44.4496	14.6299	47.7114	25.0794	45.383
ENSMUSG00000052560	Cpne8	6.12795	0.725945	8.20639	1.37581	4.18242	1.44122	7.49272	1.96083	5.58379	1.07745	7.16716	0.860499	5.09271	0.802816	8.26689	0.52928
ENSMUSG00000056091	St3gal5	22.1024	10.6417	2.5984	10.6545	19.366	10.6325	1.9786	9.65174	15.7864	9.58026	2.09634	15.3215	19.4775	17.7432	7.90245	37.1275
ENSMUSG00000015852	Fcrls	53.9907	122.45	35.8461	148.752	68.969	113.376	29.4745	154.676	72.4326	133.175	34.0882	159.714	61.3823	91.5782	29.7892	111.121
ENSMUSG00000032691	Nlrp3	1.54592	14.2817	1.09603	5.3282	2.25393	11.7433	2.54045	6.36331	2.13954	8.40582	1.87774	5.91252	2.42843	12.5296	2.25405	8.95188
ENSMUSG00000045092	S1pr1	140.636	25.0855	98.6966	47.8619	119.849	29.4356	87.1275	46.2959	120.113	33.5052	89.4209	31.7199	126.823	26.1592	83.2604	16.6443
ENSMUSG00000007613	Tgfbr1	23.2581	10.4831	6.94808	4.23598	21.0849	12.435	8.0423	4.37334	21.8112	10.6889	8.84859	4.34565	24.4705	12.5003	7.10198	4.91739
ENSMUSG00000020788	Atp2a3	12.2102	1.24876	5.58619	1.33497	18.6451	1.93431	10.3995	2.74812	11.942	1.64236	7.97285	3.01542	13.3285	5.08623	6.65169	5.83739
ENSMUSG00000078452	Raet1d	15.7004	3.00893	7.39733	2.39724	11.2948	2.67809	5.9755	1.96986	13.1479	3.86903	6.79295	2.59771	12.9104	2.98496	7.84664	2.30266
ENSMUSG00000021356	Irf4	3.26788	7.84179	5.7301	9.48573	3.54949	9.7478	8.95575	12.4657	4.25584	10.4111	7.06435	17.4054	4.01722	17.6984	5.01684	38.4387
ENSMUSG00000056498	Tmem154	1.5754	4.60002	0.532898	3.19282	1.06277	2.751	0.377606	3.46381	1.77657	4.96796	0.865028	8.78753	1.71929	5.31976	1.85294	13.1209
ENSMUSG00000029306	Ibsp	0.175945	0.316344	0.716391	1.58823	0.671849	0.0634792	0	0.273198	0.551144	1.49026	0.0536715	12.2331	0.237056	1.31541	0.11758	2.72396
ENSMUSG00000028583	Pdpn	12.5564	7.00113	0.574446	2.87573	10.4603	4.37753	1.40901	1.44584	10.0763	6.02087	3.14171	7.0383	14.0188	7.55921	2.87563	4.19017
ENSMUSG00000073409	H2-Q6	0.632927	5.8464	0.446032	1.24403	0.868554	4.19601	0.395067	3.16945	0.408918	3.94337	0.181006	1.77144	0.599598	4.65798	0.317228	6.18682
ENSMUSG00000020377	Ltc4s	107.02	25.8843	58.6175	32.1583	102.666	29.6703	56.8544	41.5232	92.8492	21.3295	47.8261	25.022	78.4503	10.1365	57.3953	7.66416
ENSMUSG00000079227	Ccr5	25.5754	12.6421	5.09018	6.44345	24.1586	9.49793	4.99668	5.0053	20.637	13.1375	4.54787	7.9404	18.8202	15.3448	3.48936	17.1446
ENSMUSG00000048442	Smim5	2.08777	2.82841	0.091242	2.50243	3.24449	4.20416	0.193959	1.17608	2.00759	3.79609	0.355461	8.12477	1.27562	5.89862	1.9468	11.7816
ENSMUSG00000024530	Slmo1	11.3057	3.74346	6.20555	1.85792	11.2202	0.969266	5.64554	2.29431	9.36218	2.46146	6.81219	1.25317	10.3498	2.40602	7.74238	1.64459
ENSMUSG00000051832	E230016K23Rik	0.103662	1.00646	0.0974028	2.26389	0.098959	2.35622	0.414111	2.09249	0.422136	1.82358	0.442706	4.35704	0.453918	2.97085	0.415651	8.38472
ENSMUSG00000029762	Akr1b8	17.6954	11.4418	49.0028	14.546	14.1121	6.89982	42.2053	11.2636	25.0986	13.9103	42.7475	14.3769	21.4351	10.0146	53.2144	6.45914
ENSMUSG00000031762	Mt2	7.555	20.6666	32.1982	45.7271	5.92433	25.7001	28.6987	53.795	13.5656	31.7758	27.6556	48.6493	15.8139	22.4419	45.8452	41.0488
ENSMUSG00000001131	Timp1	1.06018	8.08219	4.64877	7.34736	0.944608	4.74304	1.48233	3.88501	1.72692	9.60145	2.7166	13.6597	3.28535	10.8324	7.4392	16.4806
ENSMUSG00000022122	Ednrb	34.873	36.7057	163.619	96.9807	33.6146	37.7288	157.649	94.1358	54.1994	39.7772	151.752	67.8936	46.9543	34.8087	146.243	31.36
ENSMUSG00000087150	BC064078	0.169097	4.28684	0.834153	4.98546	0.484275	3.75202	1.05549	5.00185	0.317816	4.42071	0.657677	4.93196	0.42718	3.51608	0.46614	2.96522
ENSMUSG00000041202	Pla2g2d	0.683193	1.86194	5.94639	9.83173	0.892479	7.20008	8.07996	10.6194	1.35163	2.7762	3.12609	6.10185	0.981044	1.64657	3.31609	1.49966
ENSMUSG00000074417	Gm14548	3.41968	15.3098	5.14111	15.0362	2.99249	14.3736	5.86284	9.77021	4.55264	17.3789	5.84172	18.3361	4.14669	26.3653	5.88464	30.3073
ENSMUSG00000019194	Scn1b	5.29807	0.787162	1.9078	1.35798	8.17712	0.755441	2.21787	1.95073	8.2285	1.51926	3.13555	1.64499	7.91833	1.27486	3.14837	1.35321
ENSMUSG00000022528	Hes1	12.9766	1.00646	2.78926	1.37068	9.79694	3.07532	2.58349	2.21248	7.93054	1.74069	3.02707	1.89903	10.0703	2.45711	2.84815	1.64806
ENSMUSG00000021493	Pdlim7	5.71936	1.07744	0.826155	0.320655	5.7288	0.95167	1.64538	0.381738	4.21957	0.842612	1.79676	0.663936	4.43375	1.29235	1.89965	0.631128
ENSMUSG00000020829	Slc46a1	7.55204	2.63918	2.64852	1.60284	10.4587	1.87083	1.56688	2.15534	8.02159	1.1175	2.57953	1.09679	7.65818	0.99403	1.89257	0.529316
ENSMUSG00000060224	Pyroxd2	13.2989	3.48179	6.90563	3.63471	15.2941	2.39906	9.51466	4.92698	11.1821	2.35622	8.78973	1.69551	14.1851	2.21674	6.93839	1.36377
ENSMUSG00000032359	Ctsh	13.2989	56.9259	20.3691	56.2818	14.2717	64.519	18.5988	60.4947	14.503	59.4641	15.5213	54.0577	13.9152	53.901	15.9544	58.0774
ENSMUSG00000058773	Hist1h1b	0.489709	4.93071	0.613519	2.42416	1.24664	4.24038	0.978149	1.06455	0.460202	5.74319	0.746922	3.07784	0.3299	7.01727	4.7453	2.32091
ENSMUSG00000027111	Itga6	5.20363	5.28425	1.66381	0.663782	5.12946	3.13556	1.6668	0.56886	5.50214	2.6323	1.94332	0.719553	6.36201	4.52692	2.00623	0.655935
ENSMUSG00000031740	Mmp2	15.2947	3.10929	1.62096	5.25616	19.461	3.07409	3.90802	6.15443	11.4075	5.36637	2.29109	4.83449	17.9851	7.13685	5.37768	5.32436
ENSMUSG00000033278	Ptprm	3.28856	0.0469887	1.7394	0.41855	4.24125	0	2.50129	0.0811597	3.17227	0.170275	2.61089	0.0769944	3.52114	0.407054	2.22678	0.144503
ENSMUSG00000021573	Tppp	7.68991	3.28503	13.4551	6.41459	8.97849	4.21382	19.9409	6.62561	12.008	4.42639	26.9677	6.49566	11.432	4.93506	17.7546	4.8411
ENSMUSG00000029781	Fkbp9	25.3614	3.75089	24.4706	7.44451	25.0894	7.30536	26.486	9.97198	21.6229	5.49689	23.6148	5.50338	27.281	5.73411	23.0649	3.36034
ENSMUSG00000046417	Lrrc75a	10.8398	5.84691	6.01858	1.92035	15.2326	4.5536	7.41906	2.64831	11.184	3.63007	8.98347	3.12653	10.9153	5.24217	7.21868	1.68851
ENSMUSG00000028967	Errfi1	9.5014	41.6515	16.1868	22.4534	10.9228	37.9657	19.3621	32.2695	12.0256	41.5626	17.4573	38.1859	14.2075	72.2495	19.7094	75.1724
ENSMUSG00000044092	C130050O18Rik	8.11997	2.05105	3.20074	1.31486	8.03517	1.35048	2.49217	1.21777	7.25847	1.89684	3.29861	1.2603	6.94441	1.38812	2.62055	1.0888
ENSMUSG00000037759	Ptger2	0.460908	2.6992	0.835221	3.79626	0.37714	1.38972	0.427431	4.63143	0.402198	4.37581	0.301283	3.80208	0.532282	3.1382	0.660032	6.02273
ENSMUSG00000021719	Rgs7bp	7.24212	1.07761	5.78801	1.92703	7.15194	1.46412	6.48452	1.70616	7.11865	0.935573	6.62756	1.22621	6.07742	0.719584	6.44604	0.453695
ENSMUSG00000047842	Diras2	0.139472	0.210644	2.33269	2.33929	0.186402	1.63037	4.0673	4.75575	0.445631	1.09046	2.5272	4.89792	0.281872	1.40768	1.81752	3.4108
ENSMUSG00000044811	Cd300c2	61.0612	81.6088	18.0134	25.4436	50.7634	63.3705	14.3719	20.2481	49.1382	64.3479	16.2362	27.2961	55.2282	47.1155	15.2652	20.9277
ENSMUSG00000054200	Ffar4	0.174134	1.4089	0.40905	1.52118	0.83117	1.88478	0.347818	1.46009	0.900031	4.68005	0.557752	7.18228	0.351925	4.80065	0.698221	8.83056
ENSMUSG00000035783	Acta2	0.612893	4.18747	4.35113	3.45037	0.390057	3.98026	3.87662	4.31422	0.959938	8.65204	3.48994	6.7411	1.65154	8.01874	6.00721	2.71107
ENSMUSG00000035692	Isg15	6.09632	24.9219	6.63266	26.2073	3.21617	21.1846	6.40886	23.4658	3.91983	21.637	4.11084	21.1744	6.16031	16.6418	7.23677	12.3174
ENSMUSG00000032220	Myo1e	24.2478	4.78743	9.17364	3.52501	25.113	5.01133	11.1944	3.81905	20.3017	4.57857	15.4912	7.20297	18.5848	6.95201	7.53039	5.88038
ENSMUSG00000004814	Ccl24	48.0303	73.527	214.046	218.865	50.4051	115.149	223.068	270.188	61.7783	116.745	196.51	247.042	50.1853	47.0232	171.82	64.5424
ENSMUSG00000024397	Aif1	19.5364	63.0191	15.1918	39.7865	18.2137	53.9579	12.0863	37.5229	18.0201	51.8949	11.1411	31.2166	17.5777	37.8414	13.506	20.5249
ENSMUSG00000026748	Plxdc2	3.09734	3.87893	0.651836	2.53502	3.46049	5.39356	0.565971	2.62164	2.30469	5.53848	0.608032	5.36567	2.65593	5.04949	0.509308	8.79837
ENSMUSG00000038059	Smim3	13.6934	32.3143	7.18002	13.1904	12.6053	35.8624	6.59363	10.8211	15.6258	30.4697	8.61536	17.8659	12.6017	46.446	13.3589	34.0136
ENSMUSG00000018930	Ccl4	159.508	642.702	223.778	449.807	145.955	711.869	236.566	601.953	142.643	500.712	169.852	358.184	136.485	340.204	189.735	192.823
ENSMUSG00000027087	Itgav	14.1235	5.24593	3.2058	2.32954	11.0546	5.03295	4.01166	2.03556	12.2827	3.55889	5.03976	2.77945	16.5079	5.6858	3.66154	4.37567
ENSMUSG00000028238	Atp6v0d2	1.8736	6.24331	6.53331	16.7309	1.11291	5.36276	5.94618	3.45229	3.0519	15.1778	7.73481	13.542	1.64084	5.175	5.59266	5.88033
ENSMUSG00000035594	Chrna5	0.0561157	0.0605367	0.298788	1.92815	0.0714263	0.465658	0.242853	3.46791	0.0878907	0.786076	0.479302	3.3285	0.0756063	0.769147	0.318757	3.28008
ENSMUSG00000078763	Slfn1	0.585602	3.57985	1.16162	4.83142	0.621148	6.12711	1.23467	1.8792	0.672609	5.78675	0.77409	5.06073	0.657499	4.80375	6.52241	1.60355
ENSMUSG00000034485	Uaca	2.57666	0.18144	4.16577	1.02847	2.93501	0.313114	4.10522	0.814804	2.45934	0.328747	4.27274	0.586677	2.36577	0.54698	3.39215	0.165799
ENSMUSG00000029156	Sgcb	37.1361	10.8392	25.0774	10.8469	35.9145	7.50761	24.1742	13.1902	35.8105	8.50849	23.3792	9.95681	37.9298	9.78991	22.8906	7.73811
ENSMUSG00000044468	Fam46c	6.94357	5.54423	0.958952	1.06667	7.96817	7.47607	1.31047	1.62997	6.19978	4.18561	1.3676	2.81344	7.95567	6.47195	1.2788	5.71789
ENSMUSG00000020865	Abcc3	15.7329	8.59396	8.35873	5.0391	19.0745	7.58821	12.7019	4.56478	18.0015	7.46297	15.956	4.17695	17.8995	9.60434	9.72727	2.46213
ENSMUSG00000029321	Slc10a6	3.31192	1.54002	7.40426	1.84565	2.56203	1.97778	6.72931	0.744785	3.21968	1.45097	5.22564	1.07667	3.69289	1.38745	7.89912	0.811881
ENSMUSG00000028525	Pde4b	3.38495	15.1086	4.33793	8.47667	3.23138	16.5124	5.30561	9.8856	3.71557	15.1532	4.32389	12.5874	5.01196	20.4826	4.83993	23.1101
ENSMUSG00000073418	C4b	35.3417	10.4619	58.3615	42.4816	28.8825	22.3078	69.1504	47.4705	39.7785	14.5522	79.1815	26.6524	45.8858	22.3037	60.1626	13.7968
ENSMUSG00000104554	NoGeneName	6.16475	20.385	12.7183	22.9461	6.26886	21.7583	14.455	30.8394	4.78576	17.2888	9.93415	24.6372	4.60438	12.0233	10.0755	11.9408
ENSMUSG00000029380	Cxcl1	38.6101	151.411	56.8999	115.63	32.7174	164.652	64.853	127.159	43.5888	178.807	61.1953	152.898	61.7563	160.223	80.2913	109.874
ENSMUSG00000047945	Marcksl1	107.305	525.561	180.705	411.457	132.085	539.577	301.724	469.367	141.743	410.471	286.091	361.014	145.848	453.801	285.272	389.511
ENSMUSG00000066684	Pilrb1	0.346833	2.84935	0.501369	3.54255	0.356566	3.1476	1.09244	4.07635	0.401149	2.112	0.488309	3.30122	0.53919	3.11659	2.05928	5.5888
ENSMUSG00000032194	Kank2	8.16129	1.4895	9.85215	2.4123	6.89054	1.31689	6.79909	2.89109	6.98865	1.29595	6.1051	1.28879	6.75505	0.958163	5.24846	0.751557
ENSMUSG00000040229	Gpr34	307.806	109.931	188.125	101.591	281.293	102.03	172.879	102.024	301.526	107.976	185.758	78.922	251.88	58.947	158.179	30.8604
ENSMUSG00000027173	Depdc7	2.16958	8.96242	3.43077	5.03864	1.71753	9.2786	3.64651	4.68346	1.54157	8.63657	3.72881	7.35839	1.49722	8.45631	2.65222	7.62403
ENSMUSG00000020592	Sdc1	0.415188	2.29324	0.421327	2.82901	0.364643	3.46927	0.961988	2.01141	0.483811	3.66814	1.04868	6.53673	0.486674	4.05078	0.632611	5.32073
ENSMUSG00000068742	Cry2	11.214	2.43174	9.07161	3.03423	12.0587	1.51914	7.70232	2.95859	10.6449	2.48012	8.19957	2.33896	9.72727	2.80876	7.09145	2.04258
ENSMUSG00000006800	Sulf2	67.2508	17.7532	55.261	24.1187	85.1738	19.8604	55.2905	27.8947	68.5332	18.4557	57.2761	22.13	82.5486	25.4893	44.5846	14.9285
ENSMUSG00000085881	Gm15912	1.25901	3.84823	8.67525	6.96559	2.40378	2.72543	9.43034	4.10534	3.54944	1.64059	12.2898	5.9347	2.12038	2.54927	13.4619	1.59117
ENSMUSG00000024486	Hbegf	2.9644	11.8544	10.2291	15.9394	3.4154	25.6686	11.2807	29.9033	4.85109	11.8883	8.04498	16.3225	4.80315	9.21847	9.78566	5.66818
ENSMUSG00000071042	Rasgrp3	35.0635	10.9618	24.2177	13.1273	35.8326	9.16757	21.0888	13.1152	31.6303	8.03613	21.4079	7.6048	30.8827	6.26178	15.1548	2.84878
ENSMUSG00000025203	Scd2	7.11738	3.6711	1.52561	1.45723	9.72458	3.82775	1.57712	2.05143	8.73688	4.63003	1.97438	5.1111	10.3386	9.79005	2.09578	7.63183
ENSMUSG00000030148	Clec4a2	12.3955	55.9003	26.8024	53.1742	11.6051	49.6246	23.393	44.4333	18.2175	62.3746	22.8064	62.318	15.1799	47.2893	29.66	54.8988
ENSMUSG00000063506	Arhgap22	5.19017	1.56423	2.97954	0.485359	6.98573	1.17341	3.77593	0.656505	5.33589	1.40385	3.81964	1.11787	4.45042	1.26642	2.87983	1.01475
ENSMUSG00000010461	Eya4	4.17671	0.897701	1.45854	0.433363	2.91785	0.58891	0.879009	0.119271	3.91	0.45355	1.31803	0.377167	3.49287	0.478561	1.26727	0.257865
ENSMUSG00000042817	Flt3	0.0318835	1.42741	0	0.501342	0.0760923	1.91529	0.0318421	0.0148521	0.209736	1.35546	0.175067	0.695098	0.161091	6.37636	0.063921	10.0033
ENSMUSG00000017400	Stac2	2.96474	1.38109	5.53978	3.47281	2.73374	0.984563	7.90693	3.67232	3.5776	1.61337	7.73865	3.69229	3.81291	0.913051	6.45038	3.57661
ENSMUSG00000041827	Oasl1	0.612893	3.61812	2.46351	8.20951	0.74761	5.30702	2.68643	7.26439	1.15193	6.43912	2.16563	4.99563	1.08382	3.00703	2.11618	2.53356
ENSMUSG00000028645	Slc2a1	4.33994	10.2821	2.16442	3.36836	3.47378	11.7074	2.61726	3.62341	3.8902	9.82065	3.0093	7.33717	4.06502	14.2733	2.39274	13.0689
ENSMUSG00000033032	Afap1l1	5.35195	1.25944	5.84227	1.00839	6.89984	0.851882	5.24021	2.65194	5.41161	0.820475	5.06586	0.602873	5.64673	0.809076	4.31295	0.285976
ENSMUSG00000032369	Plscr1	1.04749	4.52007	0.773333	3.13733	0.833307	4.31915	0.747239	2.62562	1.14844	5.533	0.639069	4.02653	1.36091	11.1177	7.35017	12.7894
ENSMUSG00000031538	Plat	0.168944	0.838367	0.11112	0.339442	0.258046	1.35316	0.455557	0.975855	0.158764	1.08973	0.541126	1.79182	0.204861	8.43096	0.508056	9.72031
ENSMUSG00000043939	A530064D06Rik	0.936045	1.2983	0.0942347	1.89823	0.351048	0.94078	0.133547	0.186871	0.251327	2.58107	0.18356	5.55478	0.709403	2.71801	2.54683	10.2984
ENSMUSG00000026807	Ak8	2.15597	4.40422	5.08602	9.57719	2.01436	9.33423	3.98566	7.39337	2.45714	6.41082	3.94603	9.18973	2.13225	6.90182	4.23039	14.566
ENSMUSG00000019970	Sgk1	21.0321	8.39134	3.95627	5.56501	17.0567	8.21949	3.81595	3.73167	15.8144	9.8733	4.40993	6.77422	17.4471	9.74771	5.35808	8.38375
ENSMUSG00000029084	Cd38	3.76915	9.83427	18.4765	29.2761	2.51033	7.27373	16.837	21.5863	7.46847	14.8202	18.5032	18.1457	6.0526	12.3693	17.7783	10.0256
ENSMUSG00000042265	Trem1	0.191376	3.0968	0.247253	1.17026	0.228367	1.81248	0.0477821	0.690894	0.584495	3.36662	0.328381	3.38289	1.95802	12.0051	5.53934	10.3625
ENSMUSG00000023094	Msrb2	19.5674	5.08291	12.8128	5.08445	20.3201	4.97981	11.0166	8.72764	18.2842	5.95915	8.82665	3.9194	16.9721	2.69374	8.89052	1.3661
ENSMUSG00000049037	Clec4a1	13.156	61.7249	23.8455	61.2716	11.5187	48.2802	33.897	56.4248	16.5332	54.7778	39.396	56.1434	19.1152	51.5796	42.2167	45.9702
ENSMUSG00000050578	Mmp13	1.17972	3.96485	1.83327	3.64662	0.693046	8.69273	3.67053	1.64863	1.62032	7.53857	3.1558	3.36866	0.687754	4.24034	1.40999	2.83858
ENSMUSG00000001247	Lsr	0.432131	2.78293	0.209171	1.65869	0.450027	2.65045	0.536194	1.21998	0.430704	3.86493	0.599183	3.17891	0.449899	6.46143	0.354416	6.9881
ENSMUSG00000030737	Slco2b1	38.7771	10.4107	22.5901	15.0006	41.9209	9.7405	27.0285	16.4342	35.6293	10.1322	25.008	10.6827	39.7757	11.9245	21.6357	5.82544
ENSMUSG00000035385	Ccl2	172.492	561.399	589.327	760.3	193.233	774.309	693.326	1081.82	234.282	656.247	516.241	723.621	221.811	406.175	570.441	290.507
ENSMUSG00000039109	F13a1	612.212	324.841	1151.79	730.455	599.128	360.306	1259.27	752.435	660.492	373.814	1358	526.71	671.587	368.724	1184.48	258.282
ENSMUSG00000032010	Usp2	4.05277	1.06396	0.638569	0.41268	3.82142	1.29176	0.744942	0.270248	3.87087	1.37697	0.720534	0.429739	3.34157	1.04561	0.714479	0.408504
ENSMUSG00000029254	Stap1	0.601205	5.44555	0.703464	3.41871	0.703875	4.30953	0.781687	3.44521	0.831479	5.3546	0.851234	3.72958	1.18064	6.18029	1.55782	8.6125
ENSMUSG00000029816	Gpnmb	4.58214	11.8548	2.40039	6.54145	4.05166	9.67043	1.4984	5.32672	5.98272	15.0065	3.31506	6.46701	5.55901	7.64218	2.75051	3.6258
ENSMUSG00000066682	Pilrb2	0.350768	5.1521	0.785939	4.45486	0.721223	4.46832	1.18568	4.67564	0.507126	3.19077	0.370387	3.62485	0.681634	4.38752	2.24493	4.83379
ENSMUSG00000024014	Pim1	7.76994	33.8756	7.99197	21.5274	7.15408	38.1185	11.5709	23.6869	9.1164	29.6108	7.2789	23.8393	10.0815	25.4359	10.4618	30.8542
ENSMUSG00000035373	Ccl7	443.348	1515.2	1640.27	2237.12	470.789	1743.12	1775.02	2686.62	628.365	1673.37	1511.36	1826.29	605.292	1006.8	1670.37	635.666
ENSMUSG00000038388	Mpp6	3.73208	11.8099	9.12479	14.4197	4.11943	11.3274	7.30694	14.2339	4.64704	12.9635	6.51056	16.6118	4.71406	13.0645	7.18602	23.4582
ENSMUSG00000001156	Mxd1	5.2114	24.9038	8.58911	16.5982	5.58002	22.6084	10.5218	17.0981	6.8828	21.7216	9.11297	17.0962	8.82428	31.0772	18.2416	17.3291
ENSMUSG00000037251	Pomk	24.0689	8.98099	29.7126	8.03497	27.4954	8.46584	31.0446	12.6036	28.2654	8.79237	29.4915	7.63492	22.422	6.30562	27.1556	3.24555
ENSMUSG00000026558	Uck2	0.144418	2.49273	0.185042	1.06661	0.0877326	2.51523	0.0524475	0.880668	0.135716	2.12995	0.0120148	1.77924	0.291868	4.77278	0.552746	4.03202
ENSMUSG00000031480	Thsd1	6.30136	1.50267	3.37594	1.08162	5.71997	0.837595	2.78226	1.18443	5.06978	0.561819	2.95414	0.820747	4.91527	1.04346	2.60421	0.534416
ENSMUSG00000034845	Plvap	0.610391	0.065848	1.31913	10.611	0.466158	1.05707	0.73152	6.19849	1.08986	0.238617	2.96055	0.215794	7.9567	3.25145	3.97713	8.33144
ENSMUSG00000053063	Clec12a	27.2629	45.5321	10.3982	24.2806	30.5465	51.7746	15.1474	24.4243	24.2658	43.4794	9.29518	20.4615	21.0996	31.2663	12.899	20.2961
ENSMUSG00000029299	Abcg3	2.14795	9.58988	2.5378	11.6298	1.56325	7.61915	2.95226	9.43107	2.43822	12.2212	1.96568	9.09742	2.55732	9.71863	1.407	6.16842
ENSMUSG00000061482	Hist1h4d	1.54306	10.6536	2.31982	6.20065	3.82994	12.0252	5.85604	11.2132	4.06023	14.7789	6.21333	7.63734	2.49482	12.4015	8.97139	5.8505
ENSMUSG00000020077	Srgn	242.569	130.064	59.7702	93.7154	183.04	122.514	56.6414	89.8499	210.713	137.347	58.6275	132.165	228.784	148.106	78.3383	212.56
ENSMUSG00000097418	Mir155hg	0.738977	2.74037	0.520767	1.53317	0.837722	5.59893	0.830272	2.28055	0.998272	4.24299	0.591735	2.44925	0.886747	5.82691	0.694466	4.85941
ENSMUSG00000039783	Kmo	0.493218	3.04043	1.98616	4.12393	0.291473	2.28791	1.77094	4.44189	0.452463	1.46904	1.3326	2.6017	0.355997	2.14002	1.03591	3.70667
ENSMUSG00000099406	Gm29408	12.9146	27.8641	26.9075	36.2978	21.9771	38.8963	35.3289	55.9742	14.7747	45.5474	26.7205	52.2743	17.5893	40.9299	22.5144	91.5441
ENSMUSG00000051439	Cd14	802.161	2623.54	796.931	1498.27	863.136	2871.35	826.549	1538.08	875.198	2661.94	804.132	1833.14	907.801	2970.38	872.468	2776.43
ENSMUSG00000038065	Mturn	3.47817	0.527335	5.812	1.13325	3.58958	1.15993	6.51546	2.25954	3.44527	1.08409	7.22631	1.37366	3.83765	1.84485	5.46544	1.90683
ENSMUSG00000108693	NoGeneName	4.21083	15.0043	2.9974	4.18005	3.53254	11.3251	2.80358	2.31814	3.59737	5.36236	1.86837	3.75927	5.54444	8.04917	1.34305	5.80557
ENSMUSG00000057191	AB124611	2.08843	9.85251	4.68615	8.00549	1.81514	9.00808	2.83285	9.67031	2.3141	9.16948	3.16633	9.55052	2.20484	9.70024	5.56177	9.21826
ENSMUSG00000046031	Fam26f	1.10864	8.61104	2.7084	5.90764	1.48167	5.51979	1.1072	2.892	0.729284	7.47603	1.52184	4.05004	1.2323	3.00455	1.66697	1.89152
ENSMUSG00000002997	Prkar2b	11.6266	5.7667	23.328	10.8311	11.2125	4.5162	23.312	9.96034	12.3354	5.71768	20.6413	7.92679	11.8837	6.57752	17.3704	7.96629
ENSMUSG00000032688	Malt1	3.9448	12.5088	3.145	7.81104	4.31358	10.3509	3.4144	4.20973	3.07802	12.9445	4.61649	14.566	3.64799	23.5045	4.12209	29.1428
ENSMUSG00000042622	Maff	0.758424	4.97724	1.15802	3.9476	1.11619	7.79852	1.95672	4.44559	1.12848	5.00322	1.99544	5.17637	1.24538	5.67017	2.15406	5.15204
ENSMUSG00000046768	Rhoj	4.21722	1.53271	6.17696	1.64501	3.69219	0.890952	5.69826	1.6073	4.39757	0.969775	6.84159	1.14278	4.48938	1.24346	5.96812	0.940562
ENSMUSG00000017144	Rnd3	5.67756	21.1623	24.1569	31.851	6.55438	17.3332	20.5898	27.783	8.91605	18.4344	24.9949	23.0062	7.92909	18.2796	23.1433	23.1891
ENSMUSG00000027907	S100a11	258.946	626.291	285.684	469.415	209.359	574.168	238.936	362.865	247.135	694.265	278.459	924.972	216.815	856.182	492.735	1339.05
ENSMUSG00000029392	Rilpl1	4.9052	1.54214	2.37035	1.24878	6.47544	2.94284	3.49918	1.01844	5.32084	1.50666	3.18075	0.990945	5.06999	1.4669	3.06263	0.531372
ENSMUSG00000023913	Pla2g7	27.3952	96.1528	61.0809	116.495	22.539	82.4123	48.407	80.5906	36.1735	115.642	56.749	118.698	36.3533	90.5586	63.5056	98.5217
ENSMUSG00000059412	Fxyd2	17.3793	14.2796	53.9131	29.4173	16.4991	20.2213	52.4402	37.1239	16.2032	15.8321	46.7846	22.4688	14.5262	9.47313	53.1576	8.4772
ENSMUSG00000110040	NoGeneName	3.81768	0.475206	0.620854	0.641345	3.57438	0.874107	0.293287	0.410392	3.79462	0.861014	0.268747	1.38428	3.33844	0.480272	0.441566	0.347949
ENSMUSG00000024856	Cdk2ap2	9.39382	29.9513	33.2609	31.6522	9.19537	28.5338	26.9834	27.2554	11.35	30.0194	28.0552	41.4338	11.5717	33.3595	41.9409	45.2274
ENSMUSG00000060131	Atp8b4	0.680208	5.00527	1.52047	2.55822	0.73137	4.19268	1.20134	2.44147	1.0093	4.78638	1.71675	4.65765	1.11423	6.74485	2.24652	6.57645
ENSMUSG00000056145	AI504432	0.784027	4.29946	0.368343	0.8371	0.665294	3.9366	0.348005	0.426088	0.941448	2.95854	0.239165	0.846938	1.03434	2.93079	0.567611	5.11953
ENSMUSG00000051934	Spats2	10.6446	4.69573	8.06838	4.04443	11.3704	3.42643	9.12902	2.24883	10.97	3.05517	10.5018	3.12435	10.9962	3.14332	9.71829	1.23777
ENSMUSG00000006310	Zbtb32	0.453259	0.325979	0.81629	1.6828	0.432695	1.55355	0.339504	0.246329	0.532435	1.55042	0.587628	4.36215	0.343513	4.83593	0.302903	8.44943
ENSMUSG00000004709	Cd244	0.350534	1.12095	0.105868	0.623365	0.167315	0.392958	0.0625142	1.02637	0.2	0.978803	0.0572836	2.13919	0.607223	3.08865	0.18824	6.56216
ENSMUSG00000051043	Gprc5c	2.52634	3.72946	13.7238	10.1054	2.51912	4.43931	14.2701	11.5586	3.88316	4.67814	11.6815	6.21947	3.4107	5.01819	9.43258	3.37383
ENSMUSG00000021003	Galc	21.2296	10.4754	6.7685	6.84712	19.4182	6.42293	11.7261	7.53888	19.6223	7.00902	13.7071	5.04845	24.6591	8.18498	13.7737	4.00052
ENSMUSG00000027358	Bmp2	13.4078	3.93808	17.1503	8.01705	14.9816	5.9083	17.5132	8.42294	14.3633	4.66797	17.1094	5.38741	15.2034	3.09266	14.1926	2.74875
ENSMUSG00000050777	Tmem37	249.878	106.588	145.69	90.3527	252.76	109.146	120.111	105.496	242.82	110.396	122.337	76.3151	221.932	65.1881	140.125	23.8518
ENSMUSG00000030365	Clec2i	0.059658	1.75376	0.252251	2.86634	0.0569513	3.18017	0.238323	2.79291	0.224253	1.42846	0.191084	1.68729	0.120568	2.64823	0.209308	3.09601
ENSMUSG00000038037	Socs1	2.48534	12.7623	4.01667	8.25022	2.7522	15.3872	6.75137	11.0216	3.92378	12.1448	8.00603	12.6526	3.91783	10.8699	7.37439	8.95199
ENSMUSG00000030272	Camk1	119.568	44.9567	68.9222	41.4099	116.806	43.8084	65.0257	41.2706	104.061	41.3077	64.0778	34.2222	101.388	27.8938	58.7521	17.1307
ENSMUSG00000018500	Adora2b	11.7669	36.7345	12.4771	16.1366	11.6096	40.4854	10.7669	20.8841	9.20461	37.8406	11.37	22.7754	13.8832	43.8019	13.5745	27.8527
ENSMUSG00000026271	Gpr35	0.192595	1.51761	0.180966	1.00947	0.191851	1.84894	0.0669028	0.655312	0.299027	1.79223	0.298862	2.84197	0.617697	4.78137	0.360939	7.28635
ENSMUSG00000024556	Me2	15.9078	33.0964	30.1266	49.242	17.5913	28.6078	29.2581	36.4989	19.824	38.5293	32.8683	61.8284	18.9203	54.3406	38.479	93.281
ENSMUSG00000041992	Rapgef5	3.40704	0.3938	1.00041	0.558052	2.90399	0.0987773	1.21522	0	2.4299	0.624327	1.39193	0.21509	2.67432	0.483284	0.365923	0.0288343
ENSMUSG00000029915	Clec5a	58.4552	23.5568	38.3391	20.3443	60.7216	24.9076	40.7672	18.5559	61.7407	27.576	41.8497	19.9874	52.395	22.2003	38.5098	11.0619
ENSMUSG00000062082	Cd200r4	4.58593	1.4033	1.09797	2.52308	4.9251	2.19547	0.726633	0.657303	4.78615	2.02547	0.766719	3.09186	4.41128	1.4217	0.486223	2.80039
ENSMUSG00000047878	A4galt	2.61786	1.79998	11.5151	5.72976	2.58148	4.20354	11.2911	9.70209	2.89267	2.02428	10.162	4.10204	3.92441	2.7422	10.3526	2.12691
ENSMUSG00000035342	Lzts2	4.6609	2.02998	5.11391	1.36563	5.27852	1.30037	5.88363	0.997923	4.57049	1.42879	5.94769	1.26228	4.50505	1.56915	5.49922	0.658574
ENSMUSG00000042613	Pbxip1	30.0117	11.0664	8.26868	7.39119	28.8929	9.70844	8.16209	5.87641	25.9566	9.16381	8.64293	7.81275	27.6368	10.8701	7.52956	12.8897
ENSMUSG00000062248	Cks2	14.0213	40.8402	15.3156	28.9373	13.7198	56.342	18.7293	34.6168	14.3294	54.6417	16.5206	45.0262	17.0022	44.8791	34.084	53.8263
ENSMUSG00000043421	Hilpda	9.31821	28.4018	7.78272	21.2546	8.47185	28.4162	8.4937	18.2583	10.2857	40.9806	7.98606	22.0491	12.48	27.9214	12.5284	22.9925
ENSMUSG00000032014	Oaf	0.86761	2.06692	1.05299	3.85274	0.793737	5.08666	1.80518	3.80578	1.42683	3.10906	2.08421	5.96418	1.16896	8.51349	2.39169	8.63502
ENSMUSG00000024424	Ttc39c	0.97063	3.60139	0.580377	4.04684	0.561571	4.02723	0.616873	4.05558	0.884504	4.81491	0.92864	4.88729	0.980819	4.45296	0.840298	5.12988
ENSMUSG00000047867	Gimap6	3.40821	1.99058	13.0544	7.22517	4.28976	2.74909	10.8835	7.92802	4.87568	3.30967	11.145	3.81174	4.65048	2.75905	7.87742	1.19345
ENSMUSG00000031444	F10	0.138893	0.715882	0.0580029	1.84695	0.0441972	1.23608	0.0462378	1.63906	0.188535	2.5791	0.169476	4.43749	0.389865	2.52389	0.727085	3.13042
ENSMUSG00000028337	Coro2a	0.0677736	1.49476	0.127363	1.27619	0.100642	1.37747	0.0601652	0.743662	0.155686	1.56023	0.179176	2.42265	0.14458	3.56796	0.203812	5.68173
ENSMUSG00000029163	Emilin1	11.4646	2.22431	3.94344	3.02751	13.6107	2.31085	5.84169	1.83919	11.3509	4.8305	5.58041	4.48048	10.6244	6.53226	5.59956	2.81376
ENSMUSG00000028019	Pdgfc	16.9285	4.38057	11.4335	7.46601	15.3093	4.27635	10.5358	5.61075	16.0761	5.67124	11.0227	5.59358	15.5259	3.19225	9.87364	1.9765
ENSMUSG00000026365	Cfh	53.5941	13.3636	53.5774	29.9041	50.2453	17.8977	54.9968	30.7217	48.5955	17.0784	53.8609	22.3968	53.155	14.7501	44.4051	12.3518
ENSMUSG00000085327	Gm16104	13.308	2.93656	6.53643	4.49166	12.993	3.92843	6.34334	6.1992	7.67423	2.66034	4.15184	4.27713	11.614	2.26123	9.70197	1.72013
ENSMUSG00000028076	Cd1d1	0.420016	1.96346	0.920861	3.65165	0.324587	2.74933	0.65917	4.73295	0.60146	2.6193	0.420981	3.95973	0.747797	2.16819	0.721768	2.76789
ENSMUSG00000090698	Apold1	3.46819	1.1371	3.96165	0.445543	3.86265	1.4353	4.3466	0.98201	5.08054	0.963683	4.38743	1.20208	6.59689	0.953274	3.81741	0.709047
ENSMUSG00000027199	Gatm	55.2278	37.6307	113.19	40.7346	65.0021	47.3102	118.145	40.6303	72.0063	44.9309	112.044	39.2122	54.3486	28.9494	98.5517	17.7296
ENSMUSG00000027435	Cd93	6.88436	31.0983	10.4625	18.8987	4.64723	24.1828	10.9209	15.383	7.801	22.7231	9.35882	11.7733	8.31492	17.1111	11.4349	7.00759
ENSMUSG00000025993	Slc40a1	7.68628	8.19441	13.6335	6.76707	7.82609	5.14804	16.4149	4.57139	10.1181	3.63827	13.7375	3.15724	9.24735	4.39799	14.3234	1.3506
ENSMUSG00000025037	Maoa	10.5364	4.23888	18.7064	8.87368	10.9475	5.48161	16.3073	9.11115	11.3512	4.77887	16.8607	6.07107	11.5881	4.02567	14.6173	2.59334
ENSMUSG00000029484	Anxa3	61.1964	28.6202	28.2895	19.6358	53.0856	26.488	27.9026	16.5171	49.1935	25.4485	26.5675	18.4862	49.0583	16.6718	28.1016	10.563
ENSMUSG00000018476	Kdm6b	2.52506	13.0362	6.10094	7.41952	3.02094	14.1444	7.02497	9.85284	3.4515	9.56661	4.56155	7.34249	2.78352	8.55024	4.10902	10.6461
ENSMUSG00000039899	Fgl2	6.40363	27.598	18.803	32.2773	4.98217	26.9966	16.2441	20.7316	13.0887	29.3829	15.5003	25.0915	14.98	39.7363	23.2692	53.5661
ENSMUSG00000038811	Gngt2	2.96231	6.05086	1.41453	1.59084	1.69211	5.96585	1.13974	0.58816	2.71536	4.84099	1.46657	1.23041	3.58227	5.71827	1.97153	1.10474
ENSMUSG00000003418	St8sia6	0.374158	2.0958	0.054087	1.10627	0.0686889	3.30212	0.229953	1.38093	0.216377	2.71439	0.144865	0.949683	0.232668	2.2728	0.187531	2.97363
ENSMUSG00000037003	Tns2	5.05728	0.957874	4.54636	1.00048	5.70004	1.26748	5.12784	0.971094	4.24465	0.754587	5.69978	1.16768	5.6175	0.938021	4.39873	1.06119
ENSMUSG00000000184	Ccnd2	0.305317	2.79466	0.478135	1.90741	0.335626	3.98562	0.572882	2.45659	0.426032	3.16474	0.389478	3.52167	0.617043	3.45852	0.695578	5.77925
ENSMUSG00000030342	Cd9	425.494	126.311	233.312	68.9512	432.258	157.818	251.553	49.4884	433.799	165.247	270.901	166.536	377.124	169.395	266.238	250.963
ENSMUSG00000071547	Nt5dc2	15.2576	54.4004	12.7974	74.1727	14.7299	49.3564	19.3701	62.9621	18.8746	60.825	19.8793	49.5725	18.5535	52.5234	23.0713	25.411
ENSMUSG00000031765	Mt1	72.1181	145.326	175.893	255.505	68.6929	192.309	158.582	314.311	84.2632	180.126	140.614	227.978	82.0116	138.743	202.451	158.98
ENSMUSG00000026437	Cdk18	3.18271	1.27289	0.525167	0.244125	3.40884	0.840214	0.0930319	0.289285	2.21767	0.606928	0.383615	0.567172	2.99649	0.783486	0.435763	0.0294322
ENSMUSG00000079037	Prnp	24.8093	7.47508	27.9553	8.04257	18.1791	6.97546	19.6959	7.58413	24.2707	8.00323	23.8126	6.73808	26.098	9.28309	26.3265	6.70575
ENSMUSG00000019122	Ccl9	136.926	329.099	299.265	424.735	120.442	280.097	261.221	352.66	151.009	378.512	261.276	489.748	160.794	321.02	350.697	491.427
ENSMUSG00000038168	P3h2	1.211	1.19281	10.983	7.26726	3.06607	6.09786	10.5168	8.97678	2.52347	3.88506	9.80551	5.61533	2.58044	3.39516	5.77937	3.21905
ENSMUSG00000034226	Rhov	1.06827	6.76096	0.869933	1.05764	0.883832	5.08758	1.28027	1.39336	0.936977	5.15058	0.977622	2.60173	1.58325	4.99167	1.85615	2.16018
ENSMUSG00000026826	Nr4a2	7.29783	10.2062	3.04029	6.09095	6.20291	6.73791	2.48507	3.32578	7.18861	9.65003	3.88643	9.87456	11.6569	19.7124	4.08961	30.3366
ENSMUSG00000034487	Kdelc2	30.4411	11.971	30.6884	14.5144	32.9538	6.71957	27.1069	15.3398	32.75	11.4605	33.4844	11.4158	33.2458	9.41733	26.7567	5.714
ENSMUSG00000033213	AA467197	1.03221	1.72091	0.705369	1.92637	1.29891	3.047	1.40574	1.35506	1.23456	4.26444	1.28812	12.3299	1.09046	7.32243	5.50275	6.84882
ENSMUSG00000062515	Fabp4	0.473121	2.85822	0.733513	5.00097	0.40649	3.25179	0.708762	4.80453	0.889226	3.28295	1.38551	6.1609	2.91634	5.26154	2.01563	6.54749
ENSMUSG00000087362	Gm13710	0.540244	7.47935	0.592226	1.57313	0.0859555	0.974573	0.0899239	0.671089	0.338461	3.25592	0.906399	0.848863	0.818872	1.93535	0.451291	0.853469
ENSMUSG00000032340	Neo1	1.959	0.0837603	1.01015	0.14087	2.10958	0.0258581	1.69997	0.0834647	2.21139	0.110904	1.79823	0.0492683	2.95727	0.139538	1.47879	0.0679346
ENSMUSG00000000732	Icosl	7.39326	17.9929	3.76287	9.9953	8.52821	15.6234	6.19702	8.73289	6.98913	11.6555	5.92014	10.4239	8.58261	24.5524	4.36727	25.8206
ENSMUSG00000031808	Slc27a1	18.013	7.39097	10.366	6.61814	19.4973	4.45098	7.72619	4.97554	20.6272	8.24668	12.0719	6.98588	18.8728	7.10139	8.66501	4.04975
ENSMUSG00000072844	G530011O06Rik	13.4025	44.4196	48.7448	58.9849	9.09716	34.0874	33.8445	46.2423	7.03973	13.5466	14.7835	10.8096	8.70264	10.6677	21.3017	8.45311
ENSMUSG00000053137	Mapk11	4.27479	0.536229	2.98915	0.998711	4.60281	0.484211	4.07068	1.0188	2.28887	0.777265	2.63835	0.351461	3.8676	0.464526	3.23875	0.753851
ENSMUSG00000026023	Cdk15	1.26591	1.07508	5.08688	1.08233	0.925639	0.612209	3.8466	0.276025	1.51868	0.84234	3.5001	1.20614	1.85075	0.654442	4.21189	0.229771
ENSMUSG00000009185	Ccl8	147.156	680.573	542.598	918.512	104.68	684.377	299.856	736.344	278.585	648.8	391.624	502.064	234.323	316.077	536.275	133.41
ENSMUSG00000050022	Amz1	1.14025	3.17113	0.481637	1.07833	1.04857	3.38548	0.334318	1.06231	1.17968	2.09585	0.363785	1.91079	0.898518	4.12552	0.356533	4.58104
ENSMUSG00000052911	Lamb2	5.72582	1.10868	2.56589	1.6673	7.89072	0.794547	8.5776	2.44837	5.72573	0.918304	5.9386	2.23189	7.98161	3.52614	6.04872	1.83695
ENSMUSG00000022091	Sorbs3	78.6228	28.6465	70.864	35.341	76.8039	25.5432	70.8309	43.8949	69.3481	21.9249	71.4939	27.8595	70.3635	18.7481	62.6664	11.2437
ENSMUSG00000031304	Il2rg	6.90973	25.5075	7.78004	18.0064	6.40141	19.7228	6.4349	13.6082	7.06874	23.1082	7.87087	19.0684	7.77771	24.9303	7.94932	22.0252
ENSMUSG00000050232	Cxcr3	4.7645	9.9774	20.6723	12.7312	3.6788	10.3898	14.6249	13.7082	5.39924	7.53243	15.8378	8.25692	6.23055	6.8753	17.5589	4.05124
ENSMUSG00000050345	4930486L24Rik	7.46914	1.43886	2.33938	2.87402	4.8384	0.866184	1.77606	0.662725	5.01363	0.608307	3.0108	0.419142	3.41437	1.57884	2.85227	0.25285
ENSMUSG00000070436	Serpinh1	4.82017	0.346662	1.1862	1.10281	5.00685	0.857114	2.32673	1.24029	5.12291	0.942162	3.29785	1.09549	5.35785	1.93054	3.64687	1.19662
ENSMUSG00000004359	Spic	0.40061	6.07201	1.80682	2.30973	0.592773	4.96482	2.06047	1.73551	0.941178	2.11421	1.55811	0.944193	0.728667	2.86402	1.46576	0.588577
ENSMUSG00000018819	Lsp1	23.961	43.0144	18.9474	31.1029	27.4073	49.6222	19.8062	33.2142	22.8011	47.3875	17.0998	54.0451	20.8151	70.775	16.5251	107.003
ENSMUSG00000027488	Snta1	9.45739	2.55062	5.48391	4.00058	11.5497	2.00578	5.6373	4.56423	11.0293	3.49729	8.8108	3.74011	10.3746	3.40391	7.53723	2.86699
ENSMUSG00000060675	Pla2g16	9.86076	2.70879	4.98903	3.49588	8.91399	2.67533	4.12727	3.89888	8.32027	2.3134	3.74603	2.92821	8.53702	1.50327	4.14261	1.84703
ENSMUSG00000000594	Gm2a	66.2995	114.893	71.5192	101.766	76.0845	136.205	56.2346	117.567	72.6059	136.225	62.6905	167.031	69.3415	205.788	62.5712	379.54
ENSMUSG00000045377	Tmem88	0.766654	6.86455	1.29665	5.62568	0.878245	5.14479	2.22042	3.99981	1.22478	5.02004	2.24511	4.06557	2.09169	5.80334	1.84442	6.97622
ENSMUSG00000039911	Spsb1	3.08431	0.813663	0.215141	0.211783	2.14721	0.189514	0.295925	0.301152	2.46812	0.171119	0.184885	0.222208	3.06224	0.641927	0.243021	0.306396
ENSMUSG00000060147	Serpinb6a	36.8583	13.5817	31.8741	20.3789	32.9356	10.6135	31.5313	18.3518	37.4032	13.336	31.3217	16.0295	36.288	7.8257	32.9098	7.32738
ENSMUSG00000031451	Gas6	552.35	263.066	809.849	543.016	623.305	264.559	785.19	532.733	593.233	282.144	786.663	346.773	551.799	219.616	690.388	144.786
ENSMUSG00000004044	Ptrf	15.3177	6.52781	20.3257	14.0194	20.483	7.4038	24.786	14.8699	19.5318	7.22797	27.8485	21.8404	17.5758	8.33213	22.7098	14.8794
ENSMUSG00000020841	Cpd	18.143	8.72862	8.394	6.09117	18.5325	10.2372	11.7625	4.0392	19.7357	8.01555	12.7621	6.81768	25.6864	15.8713	13.0104	7.99658
ENSMUSG00000074800	Gm4149	3.01536	6.86729	1.88886	3.51216	0.959519	9.42859	2.00764	7.17921	0.944557	7.5311	0.919829	5.9224	2.3699	4.38348	2.0151	5.08121
ENSMUSG00000031504	Rab20	20.2141	85.7227	22.8414	44.0698	24.1213	78.6518	25.931	51.708	21.5344	66.9303	17.8609	30.0845	33.3688	51.2166	25.9401	16.6002
ENSMUSG00000023915	Tnfrsf21	96.4658	35.0374	33.1889	36.0277	106.075	28.4562	30.332	30.134	95.4939	33.1147	30.3041	38.5107	83.0797	39.2923	32.0877	47.4307
ENSMUSG00000030103	Bhlhe40	108.376	43.0497	27.2211	27.4179	96.6992	52.494	34.8631	26.5435	87.0638	55.7431	34.1061	63.8685	81.6742	78.0157	27.3213	117.409
ENSMUSG00000040907	Atp1a3	3.95882	2.26399	0.463105	2.04164	4.55327	2.29733	0.611314	1.97742	3.35423	3.24748	0.574714	5.90183	3.24529	4.55398	1.28295	6.61578
ENSMUSG00000031216	Stard8	74.2182	26.7204	74.9828	54.8624	74.6532	29.061	97.5981	56.1742	69.9132	29.5768	109.105	42.5157	78.9322	35.6766	83.5057	23.8318
ENSMUSG00000021806	Nid2	31.8857	8.81375	16.6835	15.9663	40.4194	9.89132	27.6778	14.0202	29.731	8.61573	30.4753	11.9691	34.6545	16.5468	24.2459	11.0631
ENSMUSG00000034936	Arl4d	5.61666	7.57395	18.8011	3.98655	4.77538	5.50937	17.7922	9.23906	7.01014	4.63153	14.7776	3.82656	6.29639	2.70648	14.5154	2.74512
ENSMUSG00000030189	Ybx3	0.827613	2.08324	9.79455	12.6521	1.73062	7.50752	4.05398	3.85522	1.44438	5.45001	2.63281	15.628	6.47137	14.198	6.10358	6.36916
ENSMUSG00000029810	Tmem176b	27.6467	71.5452	26.5757	54.9684	28.4187	80.9843	25.6606	63.646	27.3971	67.0456	21.5614	57.7437	24.3335	59.9848	18.8835	61.5654
ENSMUSG00000021895	Arhgef3	76.6276	34.4892	117.235	61.2945	74.023	31.6012	103.828	62.6592	68.6085	29.8234	95.7911	37.9545	75.8935	36.5168	78.678	28.6043
ENSMUSG00000048965	Mrgpre	3.28929	0.939293	0.757519	0.309878	4.4946	0.0349043	0.193237	0.871269	2.45469	0.756392	0.413161	0.760049	3.25865	0.331504	0.614193	0.213969
ENSMUSG00000008845	Cd163	46.5276	54.7849	156.052	174.318	45.5818	84.8782	164.959	187.812	58.4588	77.0271	179.931	147.169	73.9184	108.362	163.543	136.924
ENSMUSG00000038151	Prdm1	0.909396	3.76927	0.584647	2.48778	0.925251	3.60048	0.466059	1.95087	1.11323	2.8417	0.799375	1.29729	1.02776	4.07037	0.407818	1.7013
ENSMUSG00000085867	Gm5834	6.3834	1.91287	6.33118	4.23388	8.91499	1.66333	6.37513	4.18498	7.44292	2.07953	6.81534	2.92541	9.19781	2.65133	7.4653	1.45664
ENSMUSG00000032068	Plet1	0.749288	1.3472	3.66103	0.916373	0.953723	0.865074	3.44226	0.791148	0.657196	1.0252	4.52565	2.11919	0.454292	0.840279	4.25622	1.84659
ENSMUSG00000044456	Rin3	1.08178	3.11549	0.281341	2.30345	1.21711	2.41495	0.578773	2.05167	1.12552	2.03895	0.627576	3.5968	1.17121	4.81106	1.33613	7.92844
ENSMUSG00000030427	Lilra6	0.456464	3.70439	1.1015	2.19314	0.495176	2.72858	1.04644	1.74938	0.662938	3.579	1.44307	4.24222	0.723333	4.12037	1.10232	6.23438
ENSMUSG00000026069	Il1rl1	0.124548	1.31673	1.05325	1.603	0.459735	2.25577	0.61364	1.44657	0.51499	2.22346	1.30696	2.93545	0.570544	3.16591	0.790709	6.48518
ENSMUSG00000059588	Calcrl	14.4686	5.1329	5.72547	3.65814	12.8839	4.92544	5.64528	4.20332	15.534	4.6881	6.16955	4.01816	14.4764	6.34873	5.77024	5.25963
ENSMUSG00000024533	Spire1	8.03684	1.81919	5.9825	3.06842	11.2374	3.70391	5.87399	2.06155	8.79716	2.99066	6.31598	3.44134	13.7404	3.88218	5.43406	3.21246
ENSMUSG00000015312	Gadd45b	127.608	439.027	204.968	347.811	160.869	507.887	247.326	427.791	156.2	414.023	158.16	314.756	133.981	325.35	157.974	303.206
ENSMUSG00000018920	Cxcl16	41.0101	97.9905	32.6211	29.3302	46.1441	108.789	37.5995	34.4525	40.1389	83.3185	30.9036	29.4591	40.4389	82.5512	24.7346	50.4748
ENSMUSG00000086150	Bach2os	2.81839	0.506739	0.13241	0.0820683	2.33178	1.27106	0.0938246	0.350099	1.854	0.550889	0.128961	0.332132	2.42078	0.438978	0.28252	0.178098
ENSMUSG00000017009	Sdc4	21.4996	74.002	54.4773	46.3837	26.3222	82.2334	61.8848	57.9379	28.9231	82.4815	56.8432	53.3946	30.31	78.5575	50.3493	70.9552
ENSMUSG00000044629	Cnrip1	8.77667	3.87716	13.875	4.25439	7.85637	4.56658	12.2506	5.79895	8.10098	3.56337	12.7033	3.25323	8.44773	2.2148	9.81603	1.30835
ENSMUSG00000085417	Gm13919	1.31831	0.581798	5.51789	2.565	1.2013	1.29718	4.36873	4.6895	1.29519	0.702765	4.00319	3.24835	1.21105	0.672001	3.06347	0.908793
ENSMUSG00000035778	Ggta1	4.5906	1.61692	0.966255	0.422744	4.03585	2.8663	0.66454	0.951797	3.9666	1.8064	0.885727	0.53068	3.95282	2.43082	1.09147	1.21047
ENSMUSG00000034271	Jdp2	2.08585	10.0435	6.16653	6.08858	4.29812	15.0328	5.9446	6.75408	3.32272	11.8583	5.16786	7.97371	7.45423	20.1585	7.8791	6.79937
ENSMUSG00000039987	Phtf2	10.8414	2.43528	5.0087	2.99117	10.2227	2.8335	5.56995	2.93378	10.3842	3.26297	5.58999	3.47622	10.1884	3.30628	4.45922	2.79607
ENSMUSG00000032561	Acpp	0.139704	1.26365	0.282732	2.1498	0.18466	1.12827	0.654685	2.49297	0.201979	0.945239	0.658914	2.60881	0.184608	1.11476	2.19758	2.32247
ENSMUSG00000021240	Abcd4	32.253	11.3391	40.1818	15.1357	36.5627	14.3379	34.1765	15.1136	31.4372	10.554	36.5876	10.7464	34.7255	10.5405	30.7433	5.59571
ENSMUSG00000039043	Arpin	12.251	4.71185	20.2698	8.37551	15.0003	5.99587	17.3951	5.65717	15.0667	6.50708	16.5733	6.59085	15.2861	4.57957	15.9114	3.68566
ENSMUSG00000042284	Itga1	0.0810726	1.07138	0	0.779046	0.0193486	0.789756	0.0202419	1.0952	0.285703	1.72332	0.241127	2.65122	0.184328	3.33365	0.223489	4.36104
ENSMUSG00000024501	Dpysl3	8.75044	1.72666	5.62979	2.12489	10.0322	3.02031	5.63677	2.83516	8.84659	2.36695	5.00132	3.20153	8.04425	3.03091	4.01108	1.64688
ENSMUSG00000063234	Gpr84	6.72934	18.4864	4.33788	3.69117	7.6939	16.2612	4.37622	4.37398	7.5004	14.1475	4.72614	5.53267	9.33021	17.2576	8.07904	6.82357
ENSMUSG00000035954	Dock4	5.61071	3.22921	1.8374	1.40601	5.24128	1.9863	2.91439	1.17717	4.60826	1.13197	2.25757	0.992674	6.61201	3.48622	2.1713	1.51135
ENSMUSG00000037419	Endod1	23.6817	8.42179	11.8278	6.46078	24.2119	8.67216	9.23285	7.42973	18.8498	6.38844	13.434	7.70319	21.4203	9.82643	8.94891	6.58546
ENSMUSG00000038375	Trp53inp2	17.0673	6.07518	9.88497	4.94968	18.8325	6.07668	11.2657	5.50408	16.5096	5.94269	13.7535	6.92142	20.5107	9.52473	12.589	5.48531
ENSMUSG00000019850	Tnfaip3	12.5178	42.2001	14.9213	27.5986	15.778	40.4893	18.3163	29.8539	13.2272	32.6401	19.3346	32.5049	16.7896	58.9268	15.6559	60.3889
ENSMUSG00000000127	Fer	14.3338	4.82157	12.7048	6.34952	14.4162	3.00518	11.8806	7.12919	11.6458	4.63278	12.7044	4.86799	12.5683	3.4596	9.95612	2.18242
ENSMUSG00000056888	Glipr1	5.65949	12.7658	2.80391	5.42336	4.84608	12.14	3.49406	3.2275	5.51188	12.3695	3.60977	7.07361	4.05522	10.2895	4.12594	10.4363
ENSMUSG00000040165	Cd209c	0.246451	1.32934	0.810494	2.61041	0.176452	1.63385	0.646095	2.26735	0.434252	0.692471	0.366498	1.16172	0.466946	1.95769	0.463212	5.16849
ENSMUSG00000022126	Acod1	0.508628	3.49173	0.391022	0.848248	0.662116	1.40133	0.230895	1.42159	0.130358	2.71139	0.423152	2.50654	0.32707	4.4508	0.880663	3.28714
ENSMUSG00000000957	Mmp14	9.83057	8.6608	2.15529	3.38139	8.3679	8.8226	2.31128	3.75885	8.42988	9.40738	2.83011	4.53737	9.99585	9.89513	3.01789	3.26134
ENSMUSG00000021504	B4galt7	11.4899	5.34167	5.29927	4.02491	11.2241	2.81422	4.25779	1.5852	10.5281	4.91396	5.51114	4.25808	9.64003	3.7698	5.61512	2.60949
ENSMUSG00000049624	Slc17a5	27.4552	9.95996	18.7175	11.3846	26.4102	9.36304	16.4873	10.3188	27.0772	9.84483	18.156	8.68882	27.1062	7.43439	15.8354	5.02702
ENSMUSG00000097645	Gm26863	12.0507	2.93551	9.86203	2.54688	10.7618	4.20753	6.21167	4.16486	8.40212	3.22926	10.6724	5.9553	10.2132	1.63477	8.57279	2.02658
ENSMUSG00000083282	Ctsf	70.1916	18.152	72.0697	31.651	84.6528	36.6905	64.2742	53.322	65.9622	25.8672	63.9542	26.2697	67.4533	18.5368	54.9101	6.46117
ENSMUSG00000039676	Capsl	1.79491	7.88359	1.20466	4.03193	1.3463	3.19168	1.79258	4.89723	1.08434	4.63607	1.52527	5.59018	1.29554	3.23498	1.92777	8.3852
ENSMUSG00000021614	Vcan	2.34807	0.138439	0.257455	0.036358	2.27134	0.0750808	0.155873	0.132482	1.76005	0.159314	0.168224	0.192101	2.52693	0.388953	0.278138	0.207116
ENSMUSG00000032666	1700025G04Rik	0.327223	2.4901	0.274225	2.01641	0.38836	2.90042	0.309134	1.69731	0.43217	2.19538	0.461323	2.67845	0.384278	3.71919	0.443262	5.09677
ENSMUSG00000024912	Fosl1	3.55257	12.4172	11.3494	9.80676	4.74794	12.3815	15.611	11.1869	5.87577	11.8741	15.2152	14.4853	5.81557	12.4167	21.3669	11.4491
ENSMUSG00000065037	Rn7sk	5.49628	5.13873	10.3288	14.4041	3.84774	5.15582	8.41672	16.0445	4.82076	8.23643	7.04183	18.9994	2.22159	4.45159	10.6518	3.8205
ENSMUSG00000000440	Pparg	0.682208	4.8477	0.850041	2.29313	0.594625	2.8894	0.592455	2.0449	0.655038	3.39163	0.637889	3.58279	0.884191	3.74211	0.639257	3.66901
ENSMUSG00000021720	Rnf180	40.358	22.6396	25.3247	17.0452	36.7849	20.0559	23.9732	15.6283	31.7261	17.629	26.4635	11.0835	37.3064	16.0046	20.474	5.72151
ENSMUSG00000061353	Cxcl12	0.331648	1.3054	1.4402	4.49453	0.222477	2.29933	0.993656	4.42592	0.303241	1.04245	0.557793	1.89077	0.85141	1.36539	0.880543	1.21496
ENSMUSG00000064267	Hvcn1	5.42618	4.20308	2.10463	1.26771	6.73099	2.71462	2.18972	1.6606	4.55076	1.94241	1.67449	1.48708	4.51084	2.4028	2.03974	0.568158
ENSMUSG00000042286	Stab1	36.9329	13.7378	23.4562	17.1735	31.5326	12.8121	40.0645	17.7697	33.4912	9.72195	33.3795	11.6726	49.7878	15.2291	36.364	6.46515
ENSMUSG00000059336	Slc14a1	1.00956	4.90093	4.57052	5.05098	1.2558	3.4106	3.97189	7.82369	0.977476	2.55633	2.99564	3.51505	1.08198	3.67379	3.20466	2.95779
ENSMUSG00000060594	Layn	6.52542	1.42573	3.9065	1.94823	4.91515	1.87749	3.90468	1.66734	5.01963	1.34544	3.57797	0.908505	4.78546	1.41519	4.05719	0.495865
ENSMUSG00000020668	Kif3c	2.58542	0.974279	4.1265	1.12927	3.26266	0.920018	4.56284	1.53431	3.77759	1.21146	6.75777	1.31471	3.27465	1.22463	3.85201	0.755337
ENSMUSG00000072812	Ahnak2	9.16703	3.06536	7.73471	2.46976	7.16311	2.97509	5.91805	2.5741	8.48048	3.33522	5.54702	2.27162	8.26046	2.32853	5.22438	1.94897
ENSMUSG00000101389	Ms4a4a	107.792	283.278	471.658	348.014	108.996	232.872	339.91	209.094	239.405	358.009	522.701	267.561	271.65	313.052	705.18	154.704
ENSMUSG00000108436	NoGeneName	4.04457	11.843	5.42907	11.0126	2.4069	15.4073	5.92785	12.2341	2.66554	7.90562	5.14344	8.10891	3.1847	6.33235	2.89596	5.82529
ENSMUSG00000026825	Dnm1	2.41559	0.261666	2.01997	1.28294	2.3504	0.528668	3.35156	1.3311	2.28253	0.383182	3.43298	0.927998	2.9748	0.437826	2.85109	0.48502
ENSMUSG00000039316	Rftn1	41.9814	19.5788	18.294	12.6264	47.2449	18.4392	17.2362	14.1433	37.36	16.7655	18.1027	12.6786	35.6742	19.457	14.8012	16.1479
ENSMUSG00000000359	Rem1	0.422349	0.607498	1.09133	2.42892	0.436786	0.685708	1.82781	2.88553	0.727651	0.997521	1.25616	3.98172	0.391218	0.624939	0.84674	3.36947
ENSMUSG00000000244	Tspan32	0.960813	4.08963	2.44431	4.69913	0.904742	3.34625	2.56538	4.6462	0.927488	3.98602	1.94997	4.62919	1.01713	3.20071	2.25387	3.77921
ENSMUSG00000034714	Ttyh2	4.96046	1.50211	3.62517	1.41909	6.45233	1.03613	3.12886	1.37831	4.57978	2.55154	4.16787	1.3674	5.42291	1.97898	3.02418	0.962373
ENSMUSG00000090733	Rps27	10.3045	25.1272	13.9468	24.1873	8.61076	32.6566	12.4007	29.0664	9.1471	28.3988	11.0758	29.0295	8.82624	23.4478	14.7645	18.3712
ENSMUSG00000030557	Mef2a	25.688	10.8303	15.4978	8.75746	22.1026	10.0957	15.4848	7.33979	22.2817	10.901	16.2524	7.52561	24.6387	12.813	12.8751	7.9141
ENSMUSG00000032515	Csrnp1	8.09464	23.9558	8.81013	22.2389	8.65467	24.9116	15.8315	23.8055	10.1552	20.6741	15.976	26.3279	9.29749	28.6197	13.145	35.2176
ENSMUSG00000043008	Klhl6	56.4876	22.2443	27.235	19.2348	56.5689	21.1978	22.074	16.265	44.1972	20.5074	25.0662	17.6063	47.3551	19.6097	22.745	18.0598
ENSMUSG00000019978	Epb41l2	22.8047	12.195	10.0434	8.26189	24.4412	11.3421	9.43143	5.21373	21.9171	11.3214	10.3451	8.02925	23.1006	15.3627	8.62503	9.19009
ENSMUSG00000039713	Plekhg5	5.33126	1.23581	5.15129	3.32108	5.77438	1.71681	7.7508	4.06966	4.82666	1.84545	7.07924	2.92248	5.12645	1.75878	5.23689	1.40802
ENSMUSG00000000317	Bcl6b	1.04698	0.386397	2.45941	0.601716	1.47292	0.268395	4.21002	1.36045	1.08746	0.403906	3.22741	1.49356	1.1415	0.901192	2.59616	0.522319
ENSMUSG00000022814	Umps	13.3705	6.78659	6.26475	4.74404	12.8495	3.31728	5.42362	3.70693	12.0427	6.14823	6.51161	4.07639	12.1707	6.33133	6.93498	3.15989
ENSMUSG00000071398	2410004P03Rik	1.50895	0.720514	3.74215	0.58345	1.81832	0	3.53278	0.69138	1.76672	1.11208	3.50884	0.612171	1.47479	0.624168	2.97559	0.539289
ENSMUSG00000029373	Pf4	652.117	1576.43	1906.23	2037.46	573.372	1512.9	1698.01	2259.64	843.628	1733.51	1867.11	1821.03	782.242	1045.29	2410.26	637.157
ENSMUSG00000023947	Nfkbie	35.8546	108.367	38.3949	54.5499	36.5225	91.383	54.4624	61.5358	38.5883	89.7073	46.1935	73.116	41.3418	137.585	48.5408	125.595
ENSMUSG00000024371	C2	0.863236	0.356064	3.10131	0.643198	0.969496	0.398469	2.76385	0.73327	1.26455	0.322573	2.43965	0.359039	1.28279	0.320316	2.57052	0.192526
ENSMUSG00000055053	Nfic	18.8982	5.73176	8.81219	5.54638	17.1792	6.69372	10.1266	7.20931	16.5205	6.044	10.4787	5.92833	16.7889	6.03613	9.44049	3.95011
ENSMUSG00000042249	Adrbk2	0.0605062	2.2356	0.0213198	1.02409	0.0794214	1.51446	0.0981952	0.986483	0.191904	1.24919	0.103822	0.748684	0.366848	3.01808	0.14405	3.88561
ENSMUSG00000021759	Plpp1	16.2463	5.19476	16.407	6.32949	14.7789	5.55301	17.6635	8.72092	16.5361	5.23392	16.8857	6.89445	17.4173	6.72916	18.5412	5.71612
ENSMUSG00000035711	Dok3	91.0027	42.5695	68.8485	35.568	91.5921	32.5216	64.4029	38.079	73.7973	30.1316	71.2909	30.3235	80.0669	30.7188	65.9792	15.8389
ENSMUSG00000021950	Anxa8	2.19946	2.03378	3.57974	3.77413	2.36213	1.19032	3.33414	3.07369	2.91585	3.64658	6.14629	16.5237	3.65133	9.61664	5.90566	14.1841
ENSMUSG00000044734	Serpinb1a	27.6796	14.6155	30.6374	29.3048	26.331	11.3313	25.5721	27.2975	23.5141	12.5438	24.1443	18.9449	20.4045	9.90475	59.5543	16.7743
ENSMUSG00000030156	Cd69	0.24675	1.83201	0.259127	0.798811	0.193986	2.76501	0.260926	0.148748	0.327362	2.56755	0.172679	0.889447	0.322675	2.80783	0.436493	1.67848
ENSMUSG00000056515	Rab31	373.31	139.46	287.559	159.748	415.729	122.022	264.313	167.346	357.341	145.575	291.02	157.565	363.795	140.735	248.297	113.375
ENSMUSG00000044703	Phf11a	0.985326	3.47876	1.09416	2.89524	0.7696	2.52079	0.715672	3.92226	1.01013	4.02697	0.655791	2.95566	0.633608	2.09277	0.53875	5.43397
ENSMUSG00000096768	Erdr1	3.84842	15.4508	4.69713	9.49636	2.31034	8.54554	3.40758	4.87906	0.894811	3.10194	1.12554	2.61823	2.24509	5.33908	2.98277	5.9794
ENSMUSG00000022496	Tnfrsf17	4.91091	9.47185	19.1567	12.35	3.97779	9.1812	17.9833	18.4396	8.11122	9.74443	13.6187	7.36558	4.81209	3.33774	15.9617	1.41058
ENSMUSG00000007872	Id3	13.911	50.5557	12.5243	26.245	14.4917	45.4568	16.2701	24.4912	13.2219	36.8057	11.3268	23.3745	22.4484	36.282	19.0877	25.0681
ENSMUSG00000032491	Nradd	8.24227	2.65918	8.10648	3.12905	7.02266	2.0427	5.69288	3.22944	7.67324	2.25849	7.33137	3.22256	8.60123	2.05164	6.71786	1.02221
ENSMUSG00000022246	Rai14	6.3065	2.16899	2.07693	1.28729	5.85348	2.14917	3.80394	1.59393	5.7622	1.30591	3.53138	2.17805	6.48628	1.9023	2.14063	1.34943
ENSMUSG00000031785	Adgrg1	1.43001	0.624243	3.18104	1.65593	1.26354	0.719907	4.62324	1.32607	1.78762	0.487523	3.82859	0.901379	2.00959	1.3426	3.94703	0.907846
ENSMUSG00000027514	Zbp1	1.81409	6.36565	1.04895	6.04285	1.00862	3.99176	1.17464	4.1045	1.64858	5.33827	0.966898	3.19496	1.14822	3.48379	1.31889	3.04223
ENSMUSG00000041112	Elmo1	36.492	18.5496	18.7599	14.1069	37.25	17.6991	17.6564	10.7489	31.9444	15.6687	18.9184	11.5187	32.2155	17.6082	15.003	11.735
ENSMUSG00000024350	Dnajc18	5.91289	3.08812	3.19682	1.78326	4.95025	2.74283	3.39785	1.5302	6.35041	2.59126	3.22091	1.21664	5.47705	2.34626	2.3991	1.28996
ENSMUSG00000026893	Gca	0.457431	0.458222	1.04383	1.37005	0.530252	1.76825	0.619995	0.487045	0.368459	1.21343	0.598021	0.693074	0.429217	1.34352	9.43276	0.495527
ENSMUSG00000033450	Tagap	33.2389	18.4605	19.7098	7.23327	25.9719	15.4491	15.7907	8.41214	25.7522	13.5257	19.0521	10.3153	28.8864	19.0872	19.9599	13.492
ENSMUSG00000054263	Lifr	3.58735	8.37709	14.0859	12.8919	3.06265	9.58874	13.2094	12.6893	5.16643	7.71027	13.9124	9.09943	5.68803	7.65213	13.01	8.66675
ENSMUSG00000063171	Rps4l	19.3271	8.53633	25.003	11.5615	25.8705	7.73098	26.7152	13.9612	22.8348	14.0296	29.5425	15.1014	22.2897	9.09633	32.1493	8.03143
ENSMUSG00000043300	B3galnt1	46.4685	20.5808	53.4404	26.7488	38.4798	16.8301	44.6762	29.0287	50.4127	18.1774	48.2172	19.0288	44.962	12.2957	44.063	6.74582
ENSMUSG00000021886	Gpr65	28.1755	37.0362	10.8455	16.3915	24.6934	28.7024	10.5225	12.7388	23.5852	28.6932	9.80462	15.6948	26.2581	32.6923	13.3504	24.0697
ENSMUSG00000045664	Cdc42ep2	2.11496	8.51206	6.64965	3.12663	2.8732	12.5024	9.26126	3.33451	2.14041	4.69044	5.8809	3.3551	2.63035	7.44986	7.58332	4.54915
ENSMUSG00000021411	Pxdc1	10.0154	4.06756	9.29994	2.45319	12.4106	6.3767	11.4538	2.54311	10.8699	4.1072	9.38118	1.87453	13.0178	9.43312	8.26792	7.76219
ENSMUSG00000068115	Ninl	2.12179	0.119216	0.976069	0.35719	2.20487	0.0956902	1.01537	0.216208	1.79662	0.118803	1.00121	0.182322	2.02123	0.185895	0.38772	0.0209499
ENSMUSG00000021123	Rdh12	1.52225	0	3.68784	1.39387	1.43568	1.80645	4.23113	1.21316	1.43052	0.519803	1.86302	0.691618	1.26023	0.291373	3.98947	0.48676
ENSMUSG00000084866	A930006K02Rik	1.87554	5.39546	2.49657	3.27681	1.04443	6.59759	1.56092	4.80518	1.61565	4.27696	2.7176	2.3944	0.789677	4.67399	1.7234	0.888884
ENSMUSG00000041439	Mfsd6	8.46995	2.56521	8.0016	3.51928	9.7866	2.3894	8.75337	3.67393	8.50746	2.40075	9.05206	2.6092	9.41276	3.66693	6.27753	2.65751
ENSMUSG00000046006	Gapt	6.78722	13.4342	4.32554	14.6938	4.73269	13.926	4.126	14.6261	4.93621	13.7856	3.51072	14.4666	5.42713	13.3476	7.75022	15.5521
ENSMUSG00000018169	Mfng	5.48084	4.0264	1.26378	1.64492	7.86432	3.82142	2.01487	1.25306	5.40338	3.48336	1.75397	1.34725	5.70827	3.39373	1.6853	3.12346
ENSMUSG00000054342	Kcnn4	17.645	14.3596	5.52212	8.41769	17.8888	13.4964	5.23901	6.62522	16.1336	15.6134	6.09709	19.1077	14.0317	20.645	5.44126	21.9368
ENSMUSG00000050271	D8Ertd82e	4.88658	2.51715	2.66865	1.2447	4.88397	2.82568	3.22803	1.34528	4.76288	1.95328	3.378	1.41992	4.41606	2.63633	2.63612	0.652629
ENSMUSG00000037260	Hgsnat	151.486	75.5977	173.177	73.5908	147.343	54.2399	135.808	71.6612	166.771	69.4533	172.873	60.5976	166.579	58.4704	182.822	42.6865
ENSMUSG00000001751	Naglu	55.3912	20.0402	24.7765	27.1534	61.8528	19.7707	26.2781	20.7788	55.3964	20.804	27.774	22.9229	55.0883	23.0329	29.5737	17.2604
ENSMUSG00000023992	Trem2	50.5217	40.1261	24.7675	22.9128	60.3452	45.0675	24.6188	25.5276	47.2176	39.0233	18.2407	19.0212	45.1987	18.8856	18.2024	7.10996
ENSMUSG00000073700	Klhl21	15.2443	3.31531	9.2061	9.06398	19.0259	5.36825	13.9786	7.2287	16.0986	5.76904	17.7934	9.68148	18.8172	9.29844	12.048	8.45057
ENSMUSG00000043832	Clec4a3	39.8531	123.667	78.0963	116.464	33.0232	105.813	74.6855	111.544	45.1635	120.014	70.4006	113.568	46.9904	92.0283	75.3006	95.7355
ENSMUSG00000041729	Coro2b	0.739541	0.421482	2.07155	0.877636	0.705988	0.377574	3.09368	1.48198	0.550738	0.327289	2.27297	0.887951	0.916505	0.234721	2.68557	0.648085
ENSMUSG00000091649	Phf11b	5.53156	15.0289	10.2026	13.8702	5.67175	16.2985	9.71885	17.56	5.00573	19.7221	6.8433	11.468	6.10719	14.168	8.83082	13.7877
ENSMUSG00000026938	Fcna	193.403	88.3542	239.766	160.569	185.287	124.08	241.19	172.588	195.304	69.6243	199.546	91.1956	179.021	53.9176	209.524	41.0155
ENSMUSG00000046330	Rpl37a	45.7744	104.697	59.7856	109.734	41.239	120.821	49.2811	136.281	38.6156	104.975	43.9257	117.956	38.9204	95.347	60.4955	74.9031
ENSMUSG00000067818	Myl9	0.146775	1.21392	1.33315	1.66682	0.140115	1.90637	0.830644	3.28181	0.367815	4.15989	1.1641	2.47917	0.395507	1.96604	1.81459	1.11299
ENSMUSG00000011179	Odc1	15.0475	44.7435	16.2866	32.0305	17.2287	39.2227	15.1231	25.0655	18.2577	52.5417	18.782	34.0063	17.7076	48.6842	19.2367	32.4982
ENSMUSG00000041362	Shtn1	3.6781	7.78571	3.90616	8.96419	3.46697	8.38032	6.76017	9.54579	3.00626	7.44607	7.02897	9.92551	4.06027	9.2576	6.0572	15.2346
ENSMUSG00000060550	H2-Q7	0.244257	2.46732	0.479881	1.20266	0.445152	2.67982	0.376999	1.46881	0.344309	2.44141	0.386097	1.22988	0.448765	2.75994	0.311624	2.32577
ENSMUSG00000068874	Selenbp1	16.2644	11.5818	38.7376	24.1141	19.3991	15.6435	33.8622	33.487	16.5433	12.152	29.4403	14.9642	19.295	7.84664	27.7654	5.27596
ENSMUSG00000029322	Plac8	0.354518	5.09932	0	1.41083	0.150415	2.25969	0.15736	1.06426	0.629296	2.54082	0.21629	0.974821	4.09986	7.98821	6.39675	0.933439
ENSMUSG00000019987	Arg1	3.04033	3.63444	0.154419	4.01979	1.80419	0	0.246194	0.535882	3.16602	9.15499	1.35357	9.29608	4.81596	7.2184	3.45953	2.10297
ENSMUSG00000005125	Ndrg1	2.39137	6.44944	3.13033	3.51626	2.23931	7.0834	3.84676	2.33846	1.93849	6.96676	4.0929	4.43152	2.73007	10.1505	3.30295	7.3625
ENSMUSG00000053175	Bcl3	15.1639	43.85	45.2431	38.4061	19.7033	54.9947	50.4019	55.0625	20.2372	45.4115	40.3544	44.5504	21.9471	62.466	41.3792	57.1692
ENSMUSG00000021215	Net1	0.179097	0.946716	0.252424	1.15775	0.35904	0.600934	0.465049	0.650737	0.336611	0.87517	0.508088	1.62513	0.615323	1.87457	0.574496	6.8244
ENSMUSG00000050212	Eva1b	1.4738	6.42198	3.14975	4.01384	1.40693	6.56844	3.66528	3.90379	2.00959	5.59198	3.51728	5.14225	1.81048	5.18515	3.73684	4.49221
ENSMUSG00000032038	St3gal4	4.5584	8.82634	5.3814	11.2995	4.74212	9.55149	6.12836	12.1234	5.16245	9.88092	5.15208	11.5012	4.62594	12.5614	5.25288	20.9761
ENSMUSG00000003382	Etv3	4.22746	12.6423	9.48032	10.6984	5.03847	13.7936	12.318	13.5914	5.22957	8.73385	9.36467	10.7728	4.67572	15.6591	7.07308	21.0457
ENSMUSG00000021306	Gpr137b	203.92	101.14	142.777	78.2708	202.677	109.146	137.723	77.5178	196.455	97.0394	137.902	77.175	195.195	97.3208	118.148	72.4209
ENSMUSG00000023951	Vegfa	0.17439	2.06124	0.0284974	0.702096	0.137526	1.35411	0.0605789	0.459155	0.242261	1.83772	0.11102	1.84958	0.337118	2.81306	0.456031	1.83986
ENSMUSG00000002059	Rab34	4.72409	1.37325	4.08001	1.14908	4.29372	1.33189	3.34778	1.041	4.24006	1.42378	3.09356	1.31676	3.68745	1.20284	3.07666	0.576488
ENSMUSG00000010660	Plcd1	3.82479	0.822235	2.40892	0.932149	4.10105	0.434984	2.71264	1.53637	3.11248	0.826155	2.84076	1.01251	2.8847	0.841793	1.87534	0.880082
ENSMUSG00000085156	Snhg15	5.42351	19.9616	7.24436	10.7762	5.07593	15.7691	7.22198	9.1644	5.19665	12.3158	5.93648	10.4642	5.53418	13.2177	6.28943	12.6504
ENSMUSG00000004105	Angptl2	3.09387	0.554071	1.05711	0.309796	4.3427	1.05888	1.75866	0.717751	3.13729	1.23098	2.03677	0.821421	3.52178	2.38848	1.66713	1.14754
ENSMUSG00000044786	Zfp36	151.335	344.691	369.577	373.437	121.687	323.679	309.4	481.544	157.81	317.592	328.479	402.835	171.441	312.36	301.874	306.209
ENSMUSG00000097974	Gm10605	1.85239	0.10161	1.18003	0.246842	2.00813	0.0679653	1.28559	0.468007	1.59325	0.122737	0.718306	0.295992	2.25255	0.234728	1.38478	0.0297599
ENSMUSG00000057841	Rpl32	97.5903	250.095	111.719	206.986	89.1757	259.044	108.444	206.535	94.6735	231.152	96.3288	210.725	81.9923	205.74	144.219	195.67
ENSMUSG00000040204	2810417H13Rik	1.66205	4.89438	0.527598	3.33547	2.20843	6.05324	1.25614	2.63654	2.02625	5.29008	0.739951	5.00245	1.74758	9.00457	4.79557	6.36551
ENSMUSG00000027956	Tmem144	3.88341	0.928675	2.53447	1.37033	4.69337	1.26306	1.96784	1.05153	4.58423	1.58916	2.0833	1.14973	4.5041	1.28719	2.76139	0.815979
ENSMUSG00000026483	Fam129a	2.82383	6.57934	5.35781	6.50339	2.92593	9.24508	5.74134	6.23278	3.12154	7.26054	5.97286	8.00305	3.77319	14.7651	4.85032	18.2203
ENSMUSG00000079834	NoGeneName	11.2071	4.12689	6.37899	4.4244	6.84096	1.5746	7.53347	4.36718	10.1774	4.10732	6.90314	4.38116	9.74582	2.46729	8.04758	2.24715
ENSMUSG00000110386	NoGeneName	9.00788	32.5538	14.8119	27.0356	9.33627	25.6979	15.0365	24.637	12.6977	29.7433	16.6636	29.9503	9.88265	23.8113	9.80362	22.2606
ENSMUSG00000049881	2810025M15Rik	14.0558	3.96311	14.0075	5.39518	11.7917	4.72544	12.6551	6.00191	12.6585	4.99524	13.399	4.76843	14.2034	4.32877	12.4887	2.17005
ENSMUSG00000020644	Id2	226.907	456.704	160.712	272.718	201.114	523.756	202.96	258.82	236.569	487.665	170.072	350.228	209.989	354.312	172.698	353.939
ENSMUSG00000049625	Tifab	19.2086	15.9342	7.03706	11.0554	18.1054	15.6119	5.36729	15.8929	13.9131	13.961	5.52107	11.1547	17.1329	11.6973	6.22139	11.8315
ENSMUSG00000090387	Gm17056	0.738576	3.47161	0.446129	1.65907	0.201448	3.99706	0.842993	1.91683	0.446189	1.59831	0.627623	1.30556	0.63971	2.41578	0.423063	1.25013
ENSMUSG00000074896	Ifit3	7.50644	21.9691	8.0981	14.0255	5.50711	15.2715	8.05203	15.0875	5.87845	18.9517	3.05309	5.97919	3.58192	7.72949	5.71311	2.56936
ENSMUSG00000028064	Sema4a	1.99908	4.92166	8.06688	7.90197	2.62106	5.84931	9.00907	8.38485	2.64255	4.96539	7.84915	7.16518	2.43498	6.93406	5.88702	7.66599
ENSMUSG00000016552	Foxred2	0.820299	1.97265	2.53711	3.88897	0.456798	3.23702	3.22574	4.29083	0.513914	1.8372	2.29899	2.37642	0.967062	3.274	2.08997	2.76188
ENSMUSG00000069920	B3gnt9	0.597244	0.715885	2.86826	0.927523	1.11918	0.526728	2.56261	0.762502	1.1433	0.540457	3.0567	1.06876	1.54231	0.351423	3.21517	0.335473
ENSMUSG00000031214	Ophn1	11.4955	4.04178	6.47691	4.02048	10.2666	3.60903	5.61263	4.17112	9.30231	3.6769	6.0933	3.63421	9.48593	3.21848	4.92212	1.58275
ENSMUSG00000109279	NoGeneName	0.725098	5.8406	1.0901	3.25156	0.323027	3.29626	0.917267	3.01739	0.726834	1.79524	1.01747	1.70898	0.683862	1.58113	0.969134	1.6037
ENSMUSG00000034247	Plekhm1	13.3991	4.85005	6.6482	3.97893	11.5247	3.54194	8.34702	4.39454	10.7632	4.754	8.35008	4.69013	12.8993	4.47702	8.89522	3.52097
ENSMUSG00000041801	Phlda3	8.04933	3.00331	2.95708	2.22051	7.74191	1.83418	3.92879	2.36815	7.16619	2.54337	4.15392	2.7102	6.72723	1.80989	4.91407	2.63886
ENSMUSG00000089753	Cd300ld2	0.653574	5.23763	6.66748	5.62784	0.891316	3.33493	3.72987	5.48011	1.22839	3.10248	2.22156	4.07106	1.13217	3.57745	3.55655	0.973507
ENSMUSG00000044749	Abca6	0.666498	1.20482	1.65873	3.03704	0.601867	1.65727	2.28475	2.70193	0.897187	2.07736	1.91225	2.80208	1.11036	3.56884	2.07656	6.02728
ENSMUSG00000024737	Slc15a3	2.14085	6.20786	1.95452	2.70579	2.55103	8.08554	2.35037	3.93246	2.3971	5.69813	1.41728	3.36384	1.93319	4.85275	1.58289	5.16668
ENSMUSG00000055723	Rras2	1.69118	2.1848	2.05989	4.90628	1.55466	3.86435	1.87665	3.30678	1.76586	3.77494	1.89159	6.56939	1.96211	3.98041	1.56969	9.16295
ENSMUSG00000031438	Rnf128	5.81823	2.16943	3.37554	1.87613	5.14421	2.19778	2.32038	1.09138	5.66947	4.31237	2.64438	2.85302	5.76093	1.73337	3.07272	0.555195
ENSMUSG00000022389	Tef	10.3956	3.49534	5.75148	4.30911	9.51588	3.1831	7.2487	4.28498	8.96581	2.64855	6.86907	3.61675	11.0058	3.95471	5.89593	3.53306
ENSMUSG00000026068	Il18rap	0.0129067	1.51767	0.121274	0.450996	0.0246423	0.754374	0.10312	0.240491	0.133419	1.09741	0.094492	1.24721	0.0521689	3.35317	0.81509	3.56008
ENSMUSG00000046323	Dppa3	0.954997	5.838	0.97211	3.26749	1.3675	4.13465	1.1922	1.18629	2.24363	5.13332	1.67509	1.40676	1.60837	2.00807	0.478653	0.678911
ENSMUSG00000000531	Grasp	3.37404	2.5349	0.679352	0.736862	2.93337	2.54333	1.02293	0.617457	3.28398	3.29749	0.882207	2.27207	3.89652	8.78376	1.75149	9.30892
ENSMUSG00000024379	Tslp	9.42017	8.66108	28.3646	28.4279	9.70811	18.1908	32.6071	33.4097	10.3615	12.8681	22.6296	19.3009	13.1969	8.40328	30.9042	6.39243
ENSMUSG00000090394	4930523C07Rik	2.15522	5.57167	3.29304	4.56265	1.71453	5.61121	3.70373	4.36856	2.00711	5.31325	4.12236	5.70885	2.24652	8.04741	3.55206	12.064
ENSMUSG00000032035	Ets1	2.5664	0.454978	0.868453	0.619271	2.56132	0.505053	1.12022	0.476523	2.76593	0.464801	1.42888	0.370114	2.63867	0.318665	2.2038	0.297698
ENSMUSG00000021087	Rtn1	0.210303	2.49559	0.86099	1.94211	0.258122	1.69093	1.14016	2.09923	0.381145	1.86446	0.824815	1.73481	0.273228	2.9059	0.662549	2.70533
ENSMUSG00000029672	Fam3c	27.9417	13.4863	16.2181	10.7514	26.9304	12.7723	12.664	10.8825	25.473	14.0986	13.3382	9.91525	23.6372	10.6792	12.5915	7.1551
ENSMUSG00000038793	Lefty1	4.4594	2.01932	3.82802	1.4909	3.88918	0.417124	3.07905	0.718077	3.46638	0.807079	3.02295	1.23269	4.06115	0.617399	3.42162	0.521844
ENSMUSG00000035064	Eef2k	4.88212	0.895935	4.58733	1.72222	5.22375	1.66341	4.19365	1.76441	4.75571	1.46403	4.33998	1.33543	4.62749	1.26937	3.80466	0.706283
ENSMUSG00000103772	Gm36933	0.473923	6.09252	0.333979	1.13851	0.339316	2.30832	0.512751	0.735881	0.593821	0.926341	0.32528	0.651573	0.359173	0.738159	0.39589	1.04818
ENSMUSG00000057863	Rpl36	96.0671	226.703	110.858	220.817	95.7208	259.301	122.926	238.855	84.0718	231.198	87.3655	230.311	78.2671	180.397	145.352	166.183
ENSMUSG00000022951	Rcan1	33.5708	18.9191	41.8144	18.5812	38.4829	19.3889	47.7161	23.3195	41.1638	27.1135	51.3919	19.4958	45.4571	19.0497	43.2899	9.39351
ENSMUSG00000039084	Chad	0.0721933	0	3.1882	0.504525	7.16746	5.78235	3.31659	0	0.881962	1.12889	22.3307	2.72242	2.33443	11.4019	3.47365	14.8493
ENSMUSG00000028445	Enho	3.91857	2.0621	4.31059	1.8368	3.37583	0.931029	3.72259	2.49318	4.76025	1.02747	5.33534	0.563149	3.76655	1.42908	6.3232	0.63415
ENSMUSG00000040952	Rps19	12.1665	34.4948	16.0817	26.8201	11.936	32.4543	13.5252	27.7849	12.1489	30.3058	12.4204	27.0534	10.6669	26.3248	18.6535	23.8557
ENSMUSG00000053819	Camk2d	4.39647	2.03944	2.03982	1.10766	3.67006	1.27125	1.89862	1.13037	4.06692	1.7735	2.25297	1.05573	4.12542	1.7486	1.76425	0.797351
ENSMUSG00000026390	Marco	0.264237	1.88136	0.645532	2.81611	0.151349	0.915207	0.369452	2.56023	0.148989	4.02857	0.918893	1.86833	0.534021	1.92611	1.4833	1.20222
ENSMUSG00000055322	Tns1	8.19245	2.76329	6.15198	3.62014	6.42746	2.75556	7.36229	4.08109	7.01211	2.06036	6.72125	3.10606	8.73453	2.18198	6.03629	1.81866
ENSMUSG00000038936	Sccpdh	5.8096	1.37631	5.10215	2.36714	5.53596	2.09985	5.03338	2.20036	5.66762	1.5972	5.49029	1.65255	5.35917	1.49772	5.53827	1.39918
ENSMUSG00000091845	Gm4604	1.86592	4.02585	2.04546	4.34668	2.37502	9.42487	4.03758	4.34594	2.33798	5.47075	2.27677	4.76424	0.942752	5.81253	2.4939	5.01118
ENSMUSG00000035273	Hpse	29.0127	13.9477	22.9719	11.5867	29.5672	9.62252	16.8266	14.4054	25.5577	8.89873	18.8961	9.7444	27.1438	10.0949	15.9069	6.52397
ENSMUSG00000025216	Lbx1	0.244132	0.421385	1.19283	0.511837	0.139833	0.0528482	2.2431	0.636845	0.458843	0.238593	1.78732	0.230157	0.345372	0.365038	3.42611	0.41653
ENSMUSG00000030123	Plxnd1	2.55818	4.8513	2.75794	8.66844	2.27502	7.14085	5.6476	5.11787	2.59383	4.77658	3.01878	8.61562	4.40816	10.7078	4.33242	12.992
ENSMUSG00000039126	Prune2	13.2219	5.60504	8.95331	6.15615	12.7423	4.43809	12.2076	7.0441	13.2997	5.09677	10.3967	4.0324	15.261	4.8646	10.057	2.31542
ENSMUSG00000002741	Ykt6	43.5708	20.0658	18.9479	17.2344	44.7908	17.1776	25.2288	16.6847	40.6033	19.0322	30.513	18.1447	44.4695	21.2606	26.7457	15.3536
ENSMUSG00000022102	Dok2	43.3044	72.7212	88.9039	117.233	51.5073	89.2775	105.132	108.171	51.667	106.912	104.182	138.097	40.1623	82.6521	84.4395	105.812
ENSMUSG00000070873	Lilra5	1.3802	5.64554	1.13475	1.65783	1.31758	4.73063	0.746637	3.26822	1.45916	2.30434	0.947306	0.542161	1.10412	1.9885	0.691766	0.327062
ENSMUSG00000076433	BC100451	4.75425	2.02938	3.85656	1.58358	6.00786	1.81401	3.04014	1.05156	4.59635	1.27024	3.41179	1.8541	4.35485	0.831063	3.94288	1.06987
ENSMUSG00000047250	Ptgs1	1.30275	5.48275	1.58678	4.24307	1.38183	5.23986	1.70263	5.88872	1.02777	3.83531	1.8251	3.39265	1.31643	3.83275	3.3373	3.00326
ENSMUSG00000028341	Nr4a3	0.392658	1.29095	0.25475	0.637024	0.116023	0.920838	0.14939	0.897128	0.430498	0.941101	0.333671	1.10173	0.547934	1.88718	0.253033	5.72463
ENSMUSG00000008668	Rps18	13.0411	35.3159	18.003	32.5572	13.5902	37.2173	16.0694	30.3648	13.2427	33.1014	14.5363	31.4406	12.033	28.6874	19.9704	25.4647
ENSMUSG00000039616	Mocos	6.09788	2.63132	6.599	2.53487	6.62414	2.54903	7.01397	2.38997	5.61189	2.26051	5.65739	1.63544	5.69443	2.51527	6.07046	1.31545
ENSMUSG00000024190	Dusp1	266.77	540.256	467.037	653.154	222.49	506.31	333.819	562.424	278.691	543.956	362.01	618.518	263.54	499.27	347.757	715.843
ENSMUSG00000034764	1700006J14Rik	0.150446	0.919694	0.518327	2.1247	0.095747	0.515655	0.275461	1.84548	0.164944	0.612637	0.757237	2.06841	0.228038	0.890445	0.552969	1.40227
ENSMUSG00000079138	Gm8818	4.17025	5.99839	10.1226	9.71463	1.21643	5.89296	5.7845	10.3605	3.15694	10.4155	6.36061	7.2351	2.69229	5.62932	7.54781	6.25869
ENSMUSG00000024590	Lmnb1	2.56284	6.12729	1.7898	5.68779	3.1078	5.96023	1.176	2.38766	3.58008	7.34485	3.10602	4.12212	2.83472	16.2152	6.63089	13.1639
ENSMUSG00000024855	Pacs1	25.1011	8.5337	11.5563	7.42311	25.4032	8.16876	15.3817	9.68748	23.431	6.85683	17.855	9.8491	24.9127	14.1844	14.7944	12.1348
ENSMUSG00000022912	Pros1	151.795	69.6036	185.828	122.964	143.157	78.4154	186.639	115.342	156.56	85.2711	205.282	105.588	144.637	71.9806	180.098	89.544
ENSMUSG00000017756	Slc12a7	30.6344	13.3619	33.1156	27.9175	32.7195	12.5877	42.6815	29.113	30.5655	14.808	45.7296	22.0338	37.5006	22.8191	40.8024	11.4492
ENSMUSG00000016756	Cmah	4.85339	1.61764	6.41076	2.91238	5.32984	2.36419	6.73901	3.7626	4.48109	1.30428	5.12309	1.73763	3.59617	1.13975	3.367	0.653814
ENSMUSG00000001768	Rin2	65.6282	26.8651	55.5727	35.7476	61.0149	25.0588	51.8224	33.5179	59.4179	24.9283	55.2787	25.3617	57.2933	19.7596	45.621	14.246
ENSMUSG00000022257	Laptm4b	11.6362	2.55197	7.26901	3.6862	12.2069	5.74372	5.93825	6.96909	10.3342	6.68584	6.55307	3.69185	12.2752	4.30194	8.65208	2.18168
ENSMUSG00000030878	Cdr2	4.36148	2.05488	8.98241	2.72146	4.52048	2.87098	7.53825	5.87114	4.61728	2.99247	7.70579	3.50343	3.8676	2.2792	6.63833	1.88988
ENSMUSG00000033917	Gde1	29.5704	18.2642	18.1408	12.541	32.734	16.9675	18.1938	9.22405	29.7115	21.5778	17.5776	14.6622	33.4825	19.2454	22.2314	12.3252
ENSMUSG00000022876	Samsn1	4.23048	8.63607	3.60811	7.00744	4.00748	7.94272	3.68875	7.76136	3.89912	7.4421	3.5439	9.89408	4.63661	12.2103	7.0461	22.209
ENSMUSG00000001865	Cpa3	0.393995	0.141678	4.68925	8.7766	2.3194	0.568598	5.04971	0.122355	0.061709	3.08045	1.02159	0.851218	1.3271	3.37517	5.06848	3.79681
ENSMUSG00000073555	Gm4951	3.53078	3.46268	9.69424	5.04716	2.27624	2.92825	8.19729	5.29729	3.79204	2.33033	5.37129	2.43166	2.87281	1.41412	7.30846	1.04314
ENSMUSG00000037868	Egr2	7.49724	12.4006	18.397	18.7967	7.40024	16.745	17.1649	22.3059	6.7645	12.8901	15.4247	20.737	6.83737	12.2948	11.5561	13.5725
ENSMUSG00000033207	Mamdc2	11.6634	20.1865	33.1505	21.6788	15.47	28.2371	40.3879	25.7267	17.0043	21.3771	42.5283	31.5142	12.924	28.8963	28.9922	33.9928
ENSMUSG00000008318	Relt	1.42231	4.64297	3.4539	3.90496	1.35778	3.95864	3.83712	4.04412	2.03096	3.32167	3.2625	5.812	1.60523	5.04059	3.46254	7.65132
ENSMUSG00000026566	Mpzl1	1.44887	0.548845	2.12002	0.405791	1.75267	0.239422	2.18706	0.0515204	1.62141	0.345892	2.32795	0.260673	1.56466	0.465119	2.0954	0.503209
ENSMUSG00000021876	Rnase4	445.715	205.052	336.426	209.839	406.155	206.834	317.52	247.398	406.474	195.379	284.641	157.045	391.041	121.147	284.058	60.0791
ENSMUSG00000022221	Ripk3	3.35428	12.0694	6.22368	8.58655	3.85062	11.0755	7.50554	9.53324	3.71077	9.39882	5.96442	8.43103	4.16177	9.93969	6.04378	10.3231
ENSMUSG00000048163	Selplg	24.6356	55.8477	36.9461	46.5259	25.8063	57.7558	33.898	52.7345	23.7759	59.3551	31.7069	60.01	25.4031	72.8521	31.0961	89.0524
ENSMUSG00000019055	Plod1	42.8963	19.5338	30.5322	21.9178	46.5817	18.5562	28.3761	19.6064	43.355	18.1906	32.4693	18.7136	43.1884	18.2606	29.8815	9.70002
ENSMUSG00000020614	Fam20a	4.45112	0.812334	2.56287	1.27175	3.40253	1.08671	1.82159	1.02892	3.60108	0.88311	1.89888	1.69588	3.77075	1.12594	1.62708	1.63371
ENSMUSG00000050103	Agmo	7.41837	2.14229	7.36721	3.7786	8.51995	3.49589	7.93307	4.25311	7.35748	3.00041	7.56175	3.13372	6.76968	1.37587	6.70411	1.87151
ENSMUSG00000027994	Ccdc109b	41.8864	66.1508	54.6708	76.529	44.4946	68.2982	51.4976	78.5155	41.4725	76.0457	53.9907	111.769	38.336	80.6036	51.6114	142.52
ENSMUSG00000056671	Prelid2	8.20849	7.77088	8.65727	13.756	4.95752	6.89013	5.3537	11.5492	6.45448	9.65946	6.5921	20.7284	5.75548	5.47935	5.54153	21.2776
ENSMUSG00000071713	Csf2rb	11.7873	20.2412	12.3434	16.1905	11.5685	20.8872	15.1537	17.4805	11.3881	21.5469	16.1923	27.8114	14.2778	47.4171	16.486	63.1762
ENSMUSG00000031880	Rrad	8.80098	24.3211	13.1407	15.5871	10.646	28.9692	13.1844	18.4767	11.5563	26.0396	14.012	14.7047	10.538	27.0967	10.5746	19.9413
ENSMUSG00000020846	Fam101b	0.345344	0.670592	0.227144	0.844706	0.197805	1.68205	0.482855	0.482608	0.162267	0.81002	0.600473	0.406968	0.314072	0.290461	6.85433	0.458278
ENSMUSG00000098112	Bin2	8.85188	12.1824	3.19341	6.58562	9.1434	8.17647	3.34794	4.63435	7.43294	10.3269	3.20919	8.22865	8.60137	11.2897	5.24963	12.4466
ENSMUSG00000002885	Adgre5	81.6136	32.8574	41.2391	23.8918	97.4577	40.6838	51.1577	31.3114	76.0539	33.9894	48.2526	36.6374	74.9981	44.9658	37.1136	42.2651
ENSMUSG00000037905	Bri3bp	0.974579	2.33837	0.947309	1.46786	0.65767	2.03696	0.570565	1.09582	0.821112	2.21695	0.722729	3.44546	0.899912	4.49106	1.01062	7.53355
ENSMUSG00000037405	Icam1	69.3969	165.083	89.5238	124.645	110.137	240.523	167.912	183.229	76.257	175.923	114.155	155.326	80.705	237.358	94.1984	261.298
ENSMUSG00000043664	Tmem221	5.36859	4.48641	2.84193	2.5761	8.01235	2.04606	3.7758	2.25426	5.89779	3.32543	4.42863	1.42571	4.9665	1.97858	3.56244	1.43345
ENSMUSG00000087263	Gm15726	1.66796	8.48275	10.9707	12.4892	2.04723	6.44769	8.09103	11.0997	2.46315	3.02737	4.3612	1.6848	2.88938	4.67629	2.62742	2.25859
ENSMUSG00000016496	Cd274	2.3105	5.56305	3.55539	3.86124	1.88601	4.67545	3.00979	5.42823	1.69926	8.11601	2.14508	5.20884	2.13173	6.66547	2.04756	3.87228
ENSMUSG00000056185	Snx32	10.0703	3.96485	6.97581	5.07277	11.4379	5.17144	10.1307	3.698	10.2924	6.68095	8.00492	2.33881	9.73035	3.57206	7.73677	3.7624
ENSMUSG00000059901	Adamts14	0.384464	0.251815	0.799909	0	0.471884	0.252652	2.26266	0.0511693	0.593561	0	1.85972	0.210354	0.430125	0.0641595	1.50028	0.0650755
ENSMUSG00000045382	Cxcr4	13.5308	17.5452	3.66259	9.90226	12.9169	20.0283	7.15937	7.47175	14.526	16.7269	7.46238	10.507	18.1098	15.1572	8.21897	10.4473
ENSMUSG00000020272	Stk10	9.31647	10.4414	2.80446	5.75472	10.1352	10.9146	4.89705	7.44823	6.85182	7.00072	5.30673	8.99419	10.2114	19.9832	4.74429	19.1772
ENSMUSG00000035547	Capn5	6.99379	1.40072	1.95481	2.88721	7.15538	1.51717	2.62296	2.84548	4.74209	2.06207	3.72676	3.75575	6.70937	3.32311	2.85456	5.77609
ENSMUSG00000097147	Gm26780	0.583333	3.04157	0.137028	0.721905	0.510462	1.7363	0.339837	0.0905768	0.959322	1.80531	0.355888	0.343713	0.785942	1.86257	0.3411	0.783311
ENSMUSG00000031565	Fgfr1	3.55845	1.31625	3.70002	4.15957	4.11316	1.88442	6.12663	4.59437	3.63933	1.64341	6.27204	4.04999	4.59131	2.08471	6.15508	4.48386
ENSMUSG00000000204	Slfn4	0.204463	0.60657	0.0600365	0.290244	0.0609957	0.733071	0.191435	0	0.276205	1.22392	0.432697	0.466837	0.309913	0.513518	6.96853	0.145353
ENSMUSG00000023908	Pkmyt1	2.08188	7.05856	2.23563	3.42948	2.83919	5.08618	2.73265	3.38042	2.40363	6.33649	1.79635	4.97687	2.94523	11.7291	3.6372	9.35937
ENSMUSG00000030096	Slc6a6	104.948	42.219	77.8762	43.5772	108.479	43.1926	79.2141	50.8927	103.518	45.5575	70.1249	49.9831	108.431	44.1849	65.8951	45.0229
ENSMUSG00000022797	Tfrc	6.97628	4.89183	17.5251	15.2894	7.51182	6.12957	18.5554	17.0037	8.08885	8.65285	18.4769	10.9535	8.67712	7.39202	15.8888	7.26416
ENSMUSG00000055413	H2-Q5	0.573573	4.50009	1.02888	2.59637	1.04532	3.44272	1.24981	2.86616	0.931021	2.49704	1.38383	2.08922	0.843046	3.26486	0.679498	3.60802
ENSMUSG00000036353	P2ry12	49.0594	18.8019	44.5569	24.3872	45.2932	20.5832	37.7284	24.4338	42.3125	19.9495	37.6304	15.3476	41.4996	14.5166	36.1486	7.90207
ENSMUSG00000097077	Gm16712	0.556919	4.93988	1.04658	1.45952	0.177217	1.60745	1.1124	1.21066	0.697816	1.93523	0.339773	1.3126	0.750354	2.31315	1.24059	2.46348
ENSMUSG00000029765	Plxna4	1.85692	0.237824	0.717038	0.518492	2.69543	0.385455	0.61817	0.387076	1.753	0.348041	0.380218	0.559559	2.47618	0.372426	0.297485	0.434002
ENSMUSG00000022439	Parvg	1.63072	2.27229	0.175571	0.994211	2.12429	4.43099	0.0848232	0.538069	1.38879	1.75973	0.202087	0.720642	1.44186	3.57177	2.24766	1.46521
ENSMUSG00000044026	Slc35g1	3.45929	3.50565	10.3422	6.07436	5.20369	2.26923	7.25858	3.7437	5.22105	3.89305	9.20942	3.62362	5.50822	3.13485	9.31711	1.7554
ENSMUSG00000107355	NoGeneName	7.79806	8.11411	2.49436	4.15491	8.60578	8.44039	2.37505	4.89488	7.01634	7.29683	2.63184	3.78011	7.71226	6.56394	3.21546	5.55678
ENSMUSG00000030671	Pde3b	12.6573	4.13773	6.06119	5.02591	14.9901	5.40951	8.48531	5.26261	14.3194	5.27066	8.74326	5.91707	18.416	8.15731	7.34011	8.40597
ENSMUSG00000029401	Rilpl2	15.8955	38.3476	17.3397	35.5228	15.5381	44.161	15.44	33.092	17.5211	42.508	14.6462	33.4224	18.4277	37.951	18.5532	35.0356
ENSMUSG00000041995	Zbed3	4.16236	3.79947	2.70763	2.46136	5.56292	1.38622	2.17441	0.77557	3.67084	1.75234	3.04732	0.679169	4.52959	1.73547	4.04403	1.27466
ENSMUSG00000086712	AI427809	8.81405	3.76693	4.25999	3.88673	8.54857	3.99281	4.49974	2.5448	9.42087	4.37584	5.48907	4.18129	8.33746	3.26322	3.75432	1.81505
ENSMUSG00000051212	Gpr183	128.087	80.8522	172.685	84.5585	122.039	89.3313	142.866	71.2457	140.011	86.8651	175.506	58.6381	109.894	66.6504	136.785	46.9306
ENSMUSG00000050335	Lgals3	195.915	456.107	297.842	419.953	161.955	422.34	264.792	309.956	219.828	566.307	312.725	606.568	210.362	435.871	364.515	481.265
ENSMUSG00000012428	Steap4	1.65301	2.23942	7.04356	6.07829	2.75235	4.99303	10.865	5.51542	2.99843	2.85531	8.26728	3.98656	4.77801	4.59844	8.32355	4.40902
ENSMUSG00000000740	Rpl13	40.9762	101.564	51.3667	79.8646	36.7279	96.9358	47.7355	77.2651	41.0205	90.5484	43.4046	75.931	34.8855	81.7005	56.4723	89.4255
ENSMUSG00000108658	NoGeneName	1.37266	1.26926	2.3953	0.428255	1.31039	0.530619	3.81889	1.55288	1.75065	0.670761	1.974	0.34663	1.288	0.641398	2.85025	0
ENSMUSG00000081219	Bambi-ps1	8.39978	2.65216	11.1651	10.2013	5.86733	2.88273	7.36586	8.58911	7.31607	3.80427	8.81192	7.96723	7.03879	3.8292	9.44692	1.74774
ENSMUSG00000042677	Zc3h12a	8.27506	24.5588	3.63742	18.0875	8.5777	22.7185	14.0813	18.86	8.5107	19.7844	14.5607	22.9353	12.7762	29.0414	14.098	27.9747
ENSMUSG00000036478	Btg1	83.2531	163.067	60.3471	110.18	74.0681	170.553	69.2917	108.236	77.1674	166.467	71.9126	151.6	83.8824	148.071	69.1125	201.54
ENSMUSG00000028362	Tnfsf8	1.27433	0.343683	1.04771	0.222643	1.30776	0.551721	1.59085	0.178084	2.30528	0.155678	1.63267	0	2.06034	0.327498	0.830319	0.211383
ENSMUSG00000025574	Tk1	1.97403	6.18423	1.02387	2.64876	3.00008	5.23049	1.71913	1.88324	2.09254	3.47265	0.896034	2.36351	2.42562	4.60461	2.27958	3.81711
ENSMUSG00000024340	Btnl2	8.46887	4.18525	5.97924	4.48434	7.83623	2.7397	5.26847	6.85417	7.00266	2.12698	4.37303	4.04222	6.69323	1.30433	5.12206	1.32295
ENSMUSG00000048720	Tbc1d12	5.27325	1.39886	2.30143	1.93827	4.86895	2.90059	2.27348	0.912762	4.76595	2.11213	2.71614	1.69788	4.57153	1.96582	2.16639	1.36567
ENSMUSG00000062997	Rpl35	44.623	100.753	58.9939	94.4223	38.6373	108.745	42.3233	91.5744	37.6513	92.8054	42.1436	93.1472	37.7365	78.6989	57.6864	70.5377
ENSMUSG00000047415	Gpr68	0.339543	1.44075	1.81853	1.54239	0.378161	1.83756	1.95549	1.67657	0.808345	2.48879	2.40298	3.24107	0.411728	2.55966	1.57702	3.59391
ENSMUSG00000004633	Chn2	2.27301	2.46016	0.836039	2.29262	2.29123	2.59782	1.08276	2.65402	2.2555	2.49912	1.06059	3.48044	2.00221	3.15136	0.786984	5.95329
ENSMUSG00000039982	Dtx4	8.01552	3.97173	2.51051	2.81186	8.63595	4.91854	4.53834	3.88082	7.29529	5.03739	3.56178	2.50402	9.88541	5.26908	4.3865	2.7918
ENSMUSG00000020577	Tspan13	6.29775	12.3283	6.44938	6.3669	6.41732	20.3729	6.99628	2.7029	8.07944	13.6928	6.9937	6.79613	7.43641	24.3022	7.12869	28.0363
ENSMUSG00000021365	Nedd9	24.5362	8.23325	9.29828	9.21306	21.1713	7.527	11.5888	8.94156	18.3443	8.34646	9.46545	8.09927	23.5883	10.6288	9.49848	10.1124
ENSMUSG00000024143	Rhoq	17.7729	7.02272	9.78197	8.48504	19.2847	9.3668	11.2743	12.1538	19.4695	9.11404	12.4822	6.05805	26.13	8.85992	11.6787	5.95013
ENSMUSG00000089809	A930011G23Rik	34.2303	21.1818	18.7452	13.5661	30.9088	20.4202	17.6421	12.976	32.6593	23.2329	22.2826	14.6016	30.8728	18.3743	18.4355	11.0363
ENSMUSG00000026627	Tmem206	40.6622	25.6321	22.3254	14.5292	31.1364	23.2624	21.0868	13.2816	36.1822	23.2738	22.1886	16.8636	34.5956	21.599	22.6808	13.4106
ENSMUSG00000043157	Arl11	54.75	29.3993	47.9837	24.9505	59.3754	33.926	32.5295	33.0139	50.5281	28.6335	32.0546	19.6742	48.5435	19.0437	31.0918	10.5499
ENSMUSG00000040987	Mill2	2.69019	0.705191	3.30733	0.988342	2.56813	0.816387	3.66597	2.34234	2.33907	0.638859	2.71499	0.859223	2.33734	0.51691	2.04142	0.238313
ENSMUSG00000023885	Thbs2	2.53956	0.972131	0.250168	0.679856	3.89068	2.66008	0.777245	0.763219	2.44428	0.200157	0.487303	0.748184	3.5389	2.50728	1.45762	1.04829
ENSMUSG00000085894	Gm15832	0	3.57096	0.435441	0.983162	0.442398	0.931537	0.595059	0.740139	0.311071	2.58806	0.484684	1.40431	0.80278	1.97981	0.597271	2.38459
ENSMUSG00000106807	NoGeneName	0.784506	2.53894	2.50626	3.0154	0.674022	2.46247	3.6824	1.2425	0.368618	1.22673	2.29739	2.77349	0.317097	0.586516	1.96601	0.817973
ENSMUSG00000028413	B4galt1	37.5362	23.1079	21.1196	18.6532	42.0343	23.5011	23.7047	16.0613	39.6468	21.5275	28.283	16.6607	40.1561	26.1305	24.2435	14.104
ENSMUSG00000030595	Nfkbib	17.4605	43.9509	29.0489	31.7085	17.8333	48.6693	27.3756	37.9564	18.1433	43.2725	24.9418	36.6906	20.1101	41.9339	28.1988	35.7404
ENSMUSG00000030865	Chp2	20.9603	21.2212	67.5609	46.5754	20.9159	32.0846	59.2089	62.0585	26.1356	23.6005	43.7018	23.0218	20.9061	14.5801	43.2458	7.90848
ENSMUSG00000041052	Slc7a13	0.226594	1.28334	3.35337	2.82072	0.865255	0.490519	2.77218	2.16384	0.372647	1.55017	1.81445	1.46866	0.286216	0.847038	1.53321	0.429565
ENSMUSG00000046364	Rpl27a	7.46952	19.066	7.97015	14.9304	6.33296	19.7324	7.61156	14.5548	7.59051	16.654	7.06738	14.7105	6.24303	14.5052	9.87344	14.1123
ENSMUSG00000014496	Ankrd28	4.17503	1.35119	3.59602	2.12751	4.05204	2.33478	3.89165	0.82115	4.42479	1.2921	4.69103	1.33935	5.08607	1.92917	4.06887	1.01133
ENSMUSG00000048277	Syngr2	42.6428	65.4531	28.3126	36.7513	38.4249	60.2498	25.6424	38.5092	41.0531	61.1944	25.7792	52.9503	37.3891	77.0466	31.1475	118.799
ENSMUSG00000022607	Ptk2	5.41936	2.18829	6.69942	5.34247	6.56079	2.47411	9.05584	4.41429	5.7472	3.40272	8.75529	4.85225	6.34816	3.72061	8.23973	4.7064
ENSMUSG00000015776	Med22	11.3815	4.47403	10.34	5.1668	14.7568	3.21365	11.8845	3.62232	11.515	4.85923	12.1624	5.13727	12.5487	6.73855	8.69257	6.6784
ENSMUSG00000086320	Gm12840	55.3228	57.1773	90.8782	85.5037	48.5657	85.6324	80.5585	107.047	48.1719	70.8929	67.4453	114.661	57.6628	87.4938	73.8774	185.92
ENSMUSG00000029468	P2rx7	15.3618	6.75883	13.5267	7.89597	15.7759	6.38819	14.4103	6.92133	14.5603	6.25217	14.7003	6.25483	16.0986	7.12018	11.816	3.21578
ENSMUSG00000066975	Cryba4	2.52238	0.793657	0.592519	0.459056	1.3043	0.739417	0.577297	0.195831	1.97533	0.513574	0.384723	0.185781	1.64614	0.392874	0.31606	0.0996207
ENSMUSG00000011008	Mcoln2	3.61333	8.21434	11.9741	11.7791	3.71862	9.55803	11.7941	11.3635	4.90293	8.40635	10.3557	11.0088	4.98709	6.27585	11.0429	4.57778
ENSMUSG00000046733	Gprc5a	1.45565	1.06783	4.04855	1.57679	2.16779	1.32346	6.2221	0.650953	2.07927	1.47953	4.04966	3.77388	2.00046	6.31202	3.03507	17.1091
ENSMUSG00000061068	Mcpt4	0.490039	0	5.29517	5.45804	1.40342	0	4.89404	0.342408	0.115128	2.03541	0.672683	0.721855	2.10453	2.86223	3.92979	4.64494
ENSMUSG00000061780	Cfd	0.394208	1.13404	1.23468	3.55846	15.5547	0.995585	0.787394	19.7098	0.370455	2.69685	6.37336	2.32276	12.3487	17.806	1.71236	0.622765
ENSMUSG00000008540	Mgst1	16.7796	9.09248	6.33925	8.62935	11.8107	8.95533	6.37107	4.97075	14.5332	8.02941	6.19181	6.26474	13.8107	5.18486	13.7584	2.47369
ENSMUSG00000030691	Fchsd2	7.14242	2.43347	5.45223	3.20481	7.14394	2.82125	6.16975	2.5237	5.79177	1.99507	5.40829	1.86597	6.23275	1.98969	4.34172	1.51011
ENSMUSG00000026932	Nacc2	5.42939	2.12082	5.65505	2.61016	6.15869	1.55173	5.71296	3.04158	6.10934	2.04618	5.64413	2.81857	5.67284	2.12243	4.26152	2.05182
ENSMUSG00000003546	Klc4	43.2488	22.2011	34.846	14.7838	57.6417	26.3455	37.4546	21.8495	40.1029	17.7646	33.7949	22.6517	42.6472	20.7456	26.3366	17.9721
ENSMUSG00000090958	Lrrc32	0.0415691	1.13605	0.169256	0.32682	0.0396831	2.06969	0.359798	0.438914	0.169279	0.907313	0.405777	0.996066	0.420054	2.66753	0.305577	2.90262
ENSMUSG00000020889	Nr1d1	63.1705	35.5308	69.5092	32.0089	64.1727	35.0117	73.811	34.9438	65.0272	31.241	80.2811	32.4056	59.7041	27.1871	57.4908	20.189
ENSMUSG00000020423	Btg2	69.9056	142.192	207.897	167.635	78.9327	164.967	161.621	198.472	75.3334	117.409	141.017	131.724	70.3713	143.881	101.5	186.924
ENSMUSG00000019256	Ahr	4.51532	10.2292	6.37916	11.1289	4.54138	9.49523	9.13167	13.0257	5.48591	10.0551	11.024	10.186	5.99671	15.2663	7.17731	18.2662
ENSMUSG00000067931	Zfp948	6.26854	9.51746	18.5863	16.7119	6.82635	11.0066	19.4769	18.2989	7.59262	13.9317	19.7594	16.3611	8.96192	11.3691	15.779	11.1353
ENSMUSG00000002058	Unc119	1.99883	2.03157	2.25066	4.77656	2.11316	3.34356	2.09523	3.84754	1.80077	3.2289	1.52687	5.76225	2.10328	4.97097	2.46732	9.30096
ENSMUSG00000078193	Gm2000	3.54315	6.46849	4.60967	6.66653	4.9435	8.26	2.72197	8.88721	4.35416	13.851	2.49422	6.74488	2.20329	8.66001	4.09813	3.87513
ENSMUSG00000026809	Spaca9	0.786201	3.10985	1.08347	2.97613	0.950673	2.26923	1.09926	3.02751	0.640318	3.17591	1.05525	1.85299	0.317782	2.84095	1.3135	2.98087
ENSMUSG00000104213	Ighd	0.186019	1.15388	1.3546	3.12813	0.488344	1.81208	1.67201	2.90285	0.349621	0.318148	1.0214	1.09607	0.281958	0.738824	0.652642	1.05794
ENSMUSG00000076258	Gm23935	146.818	245.612	103.965	301.122	134.063	322.43	176.379	301.319	215.956	264.1	175.252	498.992	90.3058	224.7	277.283	250.094
ENSMUSG00000061983	Rps12	48.1571	108.025	54.8259	100.163	40.1345	122.45	58.0191	96.6151	50.5232	111.56	46.6356	89.78	44.5431	83.5795	66.408	85.9802
ENSMUSG00000035900	Gramd4	0.315158	1.05672	0.288124	1.22774	0.471617	2.36939	0.561445	0.714201	0.584331	1.19873	0.522263	2.60981	0.568075	3.46266	0.631839	5.06225
ENSMUSG00000039953	Clstn1	1.78718	0.788721	2.16269	1.23005	4.23939	0.835307	2.28517	0.996491	2.53197	0.833621	1.68509	1.65935	5.33574	1.35386	1.80507	0.808509
ENSMUSG00000028744	Pqlc2	9.98328	4.9612	5.50213	4.69115	11.5618	6.46172	5.59138	5.02967	11.0057	4.98308	5.52872	3.85426	9.69841	3.37684	5.34015	2.62632
ENSMUSG00000033825	Tpsb2	0.897574	0.484144	6.85243	8.03693	1.49949	0.364316	3.80975	1.35886	0.421745	3.61849	0.821407	0.528871	1.47387	2.93584	3.48651	3.82853
ENSMUSG00000029869	Ephb6	1.60269	0	0.773308	0.264876	1.36457	0.281304	1.18965	1.04924	2.29988	0.0211666	1.30813	0.816727	1.68517	0.485761	1.0421	0.348993
ENSMUSG00000066877	Nck2	1.90203	0.369709	1.89989	0.389193	2.56821	0.296751	2.10493	0.143678	2.27051	0.569387	2.71287	0.38367	1.93932	0.608517	2.02687	0.66593
ENSMUSG00000036833	Pnpla7	8.07178	3.33473	5.24446	2.8316	7.43529	3.01437	5.62042	2.9122	7.10759	3.19047	5.97502	2.8053	7.2924	3.72576	5.45597	2.30571
ENSMUSG00000026655	Fam107b	7.63038	22.0828	8.53454	12.602	7.66673	17.1323	10.6053	12.5843	9.21039	19.3204	10.9404	13.2617	11.6754	29.1787	17.0885	30.3549
ENSMUSG00000028937	Acot7	2.97122	4.47946	3.26	3.38551	3.24161	4.03493	3.85205	3.54183	2.77484	5.86172	4.22218	8.74266	2.94646	7.82993	3.84787	16.6881
ENSMUSG00000109864	NoGeneName	0.557631	1.80469	1.3099	2.27326	0.798497	2.11247	1.11382	1.73172	0.698707	3.99651	2.04124	2.62855	0.657398	3.3873	1.21112	2.64281
ENSMUSG00000005410	Mcm5	2.2332	5.85264	1.87027	3.88049	3.11672	6.98872	2.14546	2.47631	2.73735	4.79209	1.84377	3.84744	2.8576	7.44059	2.89558	6.22382
ENSMUSG00000041841	Rpl37	64.2095	120.276	72.0309	98.4958	49.8116	137.029	63.8469	114.298	55.608	136.033	50.1835	127.266	47.4965	106.415	88.9047	91.7577
ENSMUSG00000039115	Itga9	4.5363	4.13373	9.65807	5.42665	6.64348	5.684	10.2761	4.70355	6.67028	4.07871	10.5493	3.60997	9.24334	5.76546	9.96118	1.79075
ENSMUSG00000032725	Folr2	51.351	24.9204	57.9003	50.1205	59.573	31.5556	64.1883	68.0437	49.7852	23.3122	47.8203	33.7176	49.2118	14.3545	49.3919	10.8196
ENSMUSG00000004933	Matk	1.24067	4.26535	1.80162	2.9011	1.22625	4.84245	2.52193	2.44016	1.17769	4.23157	1.74322	3.78806	1.27902	2.95716	1.72731	3.45671
ENSMUSG00000035172	Plekhh3	2.5109	0.865902	1.17964	0.638254	3.40882	0.367561	1.75741	0.594405	1.82773	0.593369	1.3561	0.521455	2.2045	0.509693	1.33069	0.380412
ENSMUSG00000028832	Stmn1	15.7995	40.9397	13.0117	22.8409	23.6	42.9201	21.3791	26.8128	17.3803	36.5136	12.2758	28.9505	17.3115	44.3244	23.5081	35.6486
ENSMUSG00000032000	Birc3	9.91053	27.7506	18.9097	21.3973	10.2482	24.2255	19.8098	24.7609	11.2168	23.2032	17.967	19.5219	11.5643	27.5417	16.2287	27.6058
ENSMUSG00000034708	Grn	702.637	327.695	532.672	339.775	805.645	343.469	513.124	445.936	718.11	345.04	494.226	324.005	698.151	268.433	410.85	175.253
ENSMUSG00000052821	Cysltr1	9.38827	21.0576	17.0179	23.6983	9.16771	18.1638	14.1228	21.5566	10.679	20.6635	13.2454	19.269	9.94139	20.0148	14.1753	29.5888
ENSMUSG00000020641	Rsad2	1.4449	3.5695	2.44377	4.72068	1.40693	3.58137	2.06353	3.82302	1.6294	8.26088	1.41485	2.48599	1.34326	2.88964	1.69462	1.42436
ENSMUSG00000052889	Prkcb	10.02	6.50802	11.1504	5.91084	14.2699	7.4638	12.5584	7.46168	12.2144	7.02611	10.4966	3.35629	10.727	5.12965	9.91448	1.857
ENSMUSG00000046794	Ppp1r3b	2.68606	0.844416	1.54064	0.755759	3.044	0.802633	1.58815	0.652482	2.21449	0.805251	1.50051	0.504906	2.56439	0.847002	1.5445	0.484216
ENSMUSG00000041420	Meis3	2.16876	0.310358	1.39319	0.473639	2.38726	0.359297	1.30399	0.773159	1.87171	0.356864	0.84047	0.482466	1.57656	0.268858	1.04263	0.251719
ENSMUSG00000052397	Ezr	47.4052	49.2154	21.0141	26.8563	49.1169	42.1032	23.4173	26.9501	44.0997	53.8333	27.0266	64.3867	48.7398	91.1041	30.5302	106.658
ENSMUSG00000049517	Rps23	83.2629	184.664	104.012	168.736	70.4494	189.099	93.5694	157.983	83.5225	174.977	86.034	158.052	71.4921	155.474	116.914	144.919
ENSMUSG00000022540	Rogdi	3.30367	9.19786	3.96646	5.59704	2.83522	8.99367	4.14923	8.11434	3.183	8.15332	3.14548	5.26957	3.25405	7.1727	4.83368	6.3578
ENSMUSG00000025854	Fam20c	4.03408	3.62296	1.27929	2.07918	4.9101	3.61317	1.50075	1.67246	3.44982	3.3216	1.30134	3.24457	4.70827	3.5532	1.24348	1.62511
ENSMUSG00000020432	Tcn2	42.5991	18.1114	37.2096	27.972	39.4773	18.942	28.567	29.2765	41.4035	18.7382	30.4188	19.1555	41.8865	15.0826	29.5561	9.79946
ENSMUSG00000044469	Tnfaip8l1	1.52944	3.24488	2.53886	2.22678	1.0707	4.13856	2.85126	4.41719	1.19774	3.28843	2.09948	3.30433	1.59701	4.95494	1.73756	7.29689
ENSMUSG00000023067	Cdkn1a	75.1861	195.646	122.261	116.832	80.438	192.524	123.678	147.455	84.1449	178.929	116.203	133.982	81.9725	164.647	122.2	152.509
ENSMUSG00000069272	Hist1h2ae	1.84564	4.26652	1.48645	5.06718	2.517	5.13685	3.15985	3.43896	0.991101	5.41129	1.93031	4.66067	1.59858	5.91361	6.87179	3.74877
ENSMUSG00000105814	NoGeneName	11.127	26.4081	10.4552	23.3285	8.49776	20.4741	12.2239	17.623	10.4566	22.8366	6.10969	24.9139	8.99507	22.8768	10.0385	12.6564
ENSMUSG00000019832	Rab32	148.729	61.2614	74.118	57.2473	127.426	53.9299	60.1041	60.4639	134.252	70.0064	65.1318	60.4119	135.348	57.5324	65.0568	61.735
ENSMUSG00000003420	Fcgrt	177.424	115.099	294.383	203.3	181.384	130.45	263.48	206.844	194.397	128.097	248.746	146.633	177.984	93.8846	252.3	81.5975
ENSMUSG00000025362	Rps26	84.3837	147.232	92.2907	142.926	55.1713	162.992	73.4352	152.176	69.8648	166.53	74.2434	168.507	58.9484	132.108	104.715	146.082
ENSMUSG00000021453	Gadd45g	17.7474	53.4455	32.7624	48.0446	19.277	56.4062	29.8121	51.8817	20.4498	37.1412	21.177	38.0597	18.314	28.717	28.98	31.3858
ENSMUSG00000032554	Trf	7.07473	13.4136	12.3421	20.1159	7.75785	16.982	12.8806	24.8014	8.27231	12.984	11.4018	14.5495	7.42736	12.954	10.2047	14.2546
ENSMUSG00000002897	Il17ra	16.4757	8.14751	5.71469	6.56588	16.0142	10.061	7.16194	7.88196	12.847	6.72465	5.30831	7.67	16.1808	11.4693	6.93378	8.24294
ENSMUSG00000031584	Gsr	15.3796	10.8858	15.6095	13.1233	19.2351	9.37679	16.4938	9.58247	18.5692	9.19598	18.5285	14.5298	21.5083	14.8579	54.0563	11.9022
ENSMUSG00000100367	Gm29336	2.53999	7.53529	2.18774	4.2528	2.62682	5.26933	0.845567	2.16918	0.99456	2.48237	1.16223	2.99324	1.92499	2.96713	1.69742	0.802529
ENSMUSG00000097815	Gm26809	128.934	194.175	208.999	252.631	139.203	241.5	220.76	285.614	137.644	191.339	182.369	277.848	150.227	232.088	178.349	439.256
ENSMUSG00000029772	Ahcyl2	1.26914	2.41627	1.14861	2.10853	1.16201	1.76977	1.23639	1.49189	1.3073	1.58024	1.30158	3.54787	1.30607	3.6576	1.17595	8.73823
ENSMUSG00000047434	Xxylt1	15.4113	5.80852	11.3574	7.94327	17.4132	5.91704	13.2788	8.8297	18.3034	7.62477	15.4862	8.41701	16.156	8.42059	11.9513	7.52528
ENSMUSG00000031700	Gpt2	6.16938	2.83945	6.39879	3.4672	5.59699	1.4772	5.59114	3.38633	6.79227	2.80374	5.59488	2.90483	8.0495	2.52483	7.04981	1.96686
ENSMUSG00000018983	E2f2	1.40892	2.17856	0.132385	1.2513	1.52433	2.82121	0.398677	0.962587	0.860617	1.83594	0.408298	1.77103	1.75591	5.46422	2.33034	5.36417
ENSMUSG00000045128	Rpl18a	25.0842	62.973	32.5544	51.1296	26.9394	68.6462	34.4461	58.8177	28.63	60.8965	28.6131	52.3333	24.1565	47.3826	38.4305	45.9301
ENSMUSG00000034157	Cipc	4.28777	1.31616	1.86865	1.0165	3.81048	1.41977	2.15519	1.60313	3.61189	1.5163	2.66542	1.14688	3.42062	1.35106	1.54818	0.775418
ENSMUSG00000021217	Tshz3	1.27229	0	1.4222	0.249114	1.34021	0.047486	1.16111	0.367861	1.7316	0.0857537	1.46545	0	1.46298	0.245999	1.34134	0.166341
ENSMUSG00000018217	Pmp22	354.912	158.631	366.319	228.376	325.253	178.54	361.676	276.181	328.876	175.588	352.634	199.408	337	118.715	338.398	89.8919
ENSMUSG00000085311	Gm15445	2.41363	5.20756	3.9688	4.21692	1.9201	6.7488	3.61575	2.9982	1.89016	5.50402	2.39288	4.26649	1.62597	5.07512	4.23405	2.47846
ENSMUSG00000038668	Lpar1	0.190534	0.56702	1.20382	1.77923	0.137985	1.01692	0.957997	2.06279	0.308712	0.95674	0.661386	1.68013	0.478015	1.12976	0.796908	1.93057
ENSMUSG00000020823	Sec14l1	18.474	7.60605	12.5957	8.86316	21.224	8.20746	16.8553	11.2911	18.1073	7.08269	18.1128	9.36057	19.5864	9.45875	14.5785	7.24191
ENSMUSG00000020654	Adcy3	1.45412	0.294445	0.928563	0.242543	1.72956	0.219021	1.35354	0.320048	1.89276	0.179365	1.43408	0.155277	1.74043	0.193503	1.31611	0.115975
ENSMUSG00000059824	Dbp	8.6785	3.10148	9.29542	4.321	7.65402	3.1891	6.25968	2.89474	6.7124	3.07153	5.4908	2.42	6.51404	1.63541	4.97624	1.40487
ENSMUSG00000030605	Mfge8	7.28078	3.82735	3.47855	3.32386	9.6894	5.10897	4.57027	3.38198	6.97737	3.50755	5.26072	3.00542	8.48989	3.78647	4.71096	2.57335
ENSMUSG00000037849	Gm4955	0.453596	2.4843	0.262281	3.81006	0.199854	0.906387	0.209081	1.8204	0.393475	2.69393	0.28738	0.534538	0.317325	1.40213	0.38474	0.793756
ENSMUSG00000021127	Zfp36l1	7.57104	20.5917	12.3972	22.0604	6.87441	19.5124	13.3984	23.0676	9.61779	15.4011	12.5933	16.5654	8.14892	14.266	12.6077	15.1709
ENSMUSG00000079641	Rpl39	11.5867	29.9503	13.2908	25.5674	12.0666	26.5482	11.9474	24.4635	11.2421	27.5744	10.6724	27.0427	12.0125	25.5939	17.7238	22.3221
ENSMUSG00000110570	NoGeneName	5.54897	13.6826	5.21391	6.92485	6.05396	6.00605	1.58337	7.38527	9.68429	4.64835	1.45088	3.73666	5.60722	1.48162	1.58925	4.50833
ENSMUSG00000051504	Siglech	1.13095	1.7589	5.00335	3.50725	1.51149	3.63151	5.638	6.40967	1.53221	1.86978	3.78629	2.05467	1.24758	1.24186	2.60747	0.929061
ENSMUSG00000053113	Socs3	71.5609	159.969	129.454	177.905	64.6168	135.028	161.835	160.488	75.7764	133.025	144.412	152.838	84.9108	211.521	148.312	176.115
ENSMUSG00000022947	Cbr3	21.5617	10.5119	12.8572	13.3117	19.8908	8.86387	15.2186	11.2995	18.8987	6.78779	14.135	9.65065	16.1315	5.9094	13.8204	4.32337
ENSMUSG00000031555	Adam9	40.3609	17.8045	32.4384	20.9286	41.9297	18.2809	30.3438	17.42	37.9979	20.3551	34.7183	17.6753	42.5655	22.2005	29.9229	14.7651
ENSMUSG00000022225	Cma1	1.35514	0.73095	7.0032	15.2908	4.31218	3.05575	7.10524	1.36772	0.31837	7.50488	0.826761	0.931556	2.05404	5.1712	7.92407	2.99716
ENSMUSG00000034792	Gna15	54.907	30.9894	41.4348	26.5092	54.9404	23.3282	40.0127	27.625	44.7954	25.1022	35.6967	20.5295	45.0615	21.4702	32.6395	12.6587
ENSMUSG00000028044	Cks1b	5.77546	13.4552	5.1958	7.99726	7.33169	14.8965	4.11122	9.38759	7.5638	10.8085	4.948	10.9331	5.52566	19.6371	9.91592	15.3167
ENSMUSG00000006356	Crip2	11.2549	4.79881	18.6075	4.21366	11.8187	6.78709	21.7848	5.71713	12.1128	7.35921	20.477	12.6317	9.82954	13.5232	16.4127	16.4087
ENSMUSG00000025190	Got1	39.4452	54.2176	24.3695	33.203	37.2225	47.7413	22.2017	31.3013	39.6502	56.1874	26.5257	47.1969	45.1569	80.4151	31.8093	96.2559
ENSMUSG00000024164	C3	1.01874	2.41388	0.239307	2.63803	0.625192	4.76505	1.07192	1.91516	1.21379	2.91577	0.932292	1.02902	2.29784	6.27329	11.2332	1.68986
ENSMUSG00000022371	Col14a1	1.5835	0.87853	0.180672	0.291479	1.92196	0.985511	0.559154	0.216021	1.95045	0.491907	0.434738	0.379878	1.98872	0.829761	0.600916	0.257306
ENSMUSG00000027737	Slc7a11	0.0202569	1.2019	0.00634457	0.749119	0.0386756	1.05973	0.0404613	0.308247	0.0571089	1.07565	0.0123586	1.31294	0.0341159	1.89307	0.426423	1.88809
ENSMUSG00000024381	Bin1	76.4234	42.8401	45.2203	37.798	76.9853	34.9664	36.956	34.9445	64.1602	31.5984	38.2122	28.5917	64.7794	28.8756	42.5216	23.4504
ENSMUSG00000096965	3300005D01Rik	0.138558	0.847022	1.17173	2.01733	0.352725	1.29975	0.645767	2.53872	0.347225	1.44442	1.09894	1.5784	0.373367	1.07906	1.11115	1.44469
ENSMUSG00000062328	Rpl17	34.8987	93.023	52.4957	88.9982	45.4164	98.9221	57.8286	84.7095	40.5904	95.2852	40.8167	91.289	42.8557	81.4616	62.7498	81.8829
ENSMUSG00000056162	Cndp1	1.7666	0.979608	1.28761	0.331725	1.11905	0.214443	1.73134	0.123054	1.27227	0.129086	1.04254	0.0972824	1.95198	0.154294	0.728209	0
ENSMUSG00000109556	NoGeneName	13.1423	17.4183	9.17335	13.1208	8.603	28.8561	8.25017	23.4385	9.17459	15.7799	5.15446	16.3725	6.07098	10.5273	7.90444	6.76249
ENSMUSG00000036931	Nfkbid	27.3731	53.2771	56.1644	62.4205	32.5185	55.7749	63.7387	68.8437	32.6888	57.8033	60.2493	73.5982	34.8324	63.9613	54.1005	82.7617
ENSMUSG00000053600	Zfp472	9.74974	4.18512	6.18729	3.65653	6.43233	1.10501	4.12935	4.23254	7.14752	3.49213	4.85826	1.86479	7.47933	2.90993	3.58184	2.03216
ENSMUSG00000067288	Rps28	14.1122	28.2733	15.4575	25.3956	12.0478	29.5893	12.8054	27.3847	12.5041	32.1552	12.3981	31.3129	10.6749	24.0404	19.7645	24.3454
ENSMUSG00000023087	Noct	1.2891	5.02838	1.60133	3.14294	1.52262	4.87167	2.46576	3.06693	1.93691	4.88994	2.35942	3.93945	1.95027	4.88688	2.68664	3.87281
ENSMUSG00000040703	Cyp2s1	0.355442	0.979915	0.173175	0.471503	0.175941	1.3109	0.157769	0.404735	0.259797	1.17079	0.240948	2.09434	0.305962	2.57125	0.290319	3.78092
ENSMUSG00000096140	Ankrd66	0.275438	2.17902	1.3803	1.60409	0.350589	0.397502	0.916938	2.13843	0.345122	1.34595	1.00826	2.27212	0.463883	0.858019	1.47255	2.00162
ENSMUSG00000030107	Usp18	3.32334	12.2709	5.66587	9.93657	4.05564	11.4217	6.12481	6.38387	4.0246	10.7818	4.26412	6.70224	4.36223	5.21896	5.04857	4.57901
ENSMUSG00000034459	Ifit1	3.28784	5.51735	5.32048	7.73883	3.26945	8.74837	4.01326	13.3585	3.30429	15.0844	1.46263	6.24231	2.67634	3.20061	3.11268	4.45825
ENSMUSG00000090516	Rps11-ps1	3.57471	6.05996	4.31853	6.24549	1.46251	9.39653	5.35511	2.8546	1.67966	5.24041	4.20604	3.91169	1.5481	2.38619	2.04763	3.63039
ENSMUSG00000014158	Trpv4	5.25547	2.42573	6.78451	4.29723	4.45679	2.11262	6.78967	3.82116	4.28814	2.66156	6.14313	2.7897	4.5377	2.15066	5.7507	2.23762
ENSMUSG00000023961	Enpp4	1.87213	0.145297	0.696043	0.0941257	1.53005	0.320716	1.37202	0.351343	1.43024	0.26326	1.26954	0.174592	1.67403	0.377604	1.09359	0.140432
ENSMUSG00000093674	Rpl41	24.4097	45.6786	26.3804	48.3581	24.0897	53.8327	27.6122	52.5695	20.3263	52.4591	20.6049	53.7147	17.5347	43.0537	30.226	30.2609
ENSMUSG00000026278	Bok	1.13713	0	0.443023	0.121141	1.77393	0.0600389	0.193893	0.180874	1.48563	0.271056	0.482246	0.16342	1.54143	0.181434	0.556038	0.131446
ENSMUSG00000015950	Ncf1	52.0805	26.3404	37.2017	20.8584	55.9168	23.9842	36.5278	18.7176	45.8535	27.2021	36.1778	26.1248	48.7909	24.8162	35.0813	24.1478
ENSMUSG00000027360	Hdc	0.144576	0.14037	0.393953	0.176815	0.179421	0.0312969	0.24546	0.0673469	0.0271729	0.0706479	0.0793844	0.0340749	0.175312	0.607997	4.92746	0.109632
ENSMUSG00000038393	Txnip	67.4501	41.0186	117.277	87.5747	69.7956	40.7645	77.6551	70.4974	66.1719	42.4646	91.1828	55.474	64.0528	40.5911	80.9942	38.2117
ENSMUSG00000025498	Irf7	1.14333	4.96391	1.8586	3.08825	1.25217	3.25701	1.23993	2.81	1.17991	4.40103	1.30308	1.63667	1.18369	2.6286	1.18829	0.897572
ENSMUSG00000029298	Gbp9	1.04259	4.18936	0.99761	3.24201	0.703093	3.1887	1.20363	2.34366	1.01572	2.77636	0.927856	2.42345	1.24684	3.44145	1.22728	3.48151
ENSMUSG00000042814	Mcts2	4.62919	2.28292	5.34387	1.96418	4.67168	0.715785	5.15155	3.08055	5.2203	2.7145	3.75221	0.467592	4.54413	2.84288	6.23136	1.62978
ENSMUSG00000042178	Armc5	11.469	3.15501	10.1299	5.28499	13.6584	5.24479	12.3705	5.34253	11.6132	3.64286	14.1693	7.43357	10.3725	7.23474	10.0596	4.64741
ENSMUSG00000026672	Optn	5.63075	2.18563	5.79757	2.39046	5.47575	3.28935	5.64973	2.41457	5.00711	1.69719	4.93622	1.79841	5.39738	1.86878	5.43335	1.15972
ENSMUSG00000021025	Nfkbia	591.811	1316.7	772.291	969.273	588.381	1493.06	802.806	1064.6	632.039	1292.29	720.432	1029.13	608.826	1211.35	789.909	1151.81
ENSMUSG00000044827	Tlr1	4.3629	12.544	6.14918	7.92883	3.43981	10.5619	2.85944	7.67572	5.45448	10.4504	4.26004	7.55148	4.34965	8.09992	3.55342	3.06468
ENSMUSG00000006651	Aplp1	1.91173	0.277623	0.794516	0.369332	2.10577	0.437716	1.24836	0	2.59116	0.413195	1.44671	0.736515	1.69032	0.481	1.21615	1.14997
ENSMUSG00000000489	Pdgfb	10.4742	6.27745	4.25695	3.1589	12.34	6.97314	5.89448	3.40765	12.7726	7.18997	5.8197	5.38794	10.1642	8.89508	4.91644	6.737
ENSMUSG00000026482	Rgl1	23.8631	44.0588	60.3794	56.1766	26.7073	46.483	64.6045	65.1866	29.6266	38.7427	60.1074	43.2815	26.3203	31.2507	53.1828	20.3233
ENSMUSG00000026181	Ppm1f	3.35266	0.928636	2.55423	1.38523	4.97383	3.0894	3.86866	0.970816	3.06549	0.863427	3.44131	1.49494	4.21192	1.84179	3.61055	1.09508
ENSMUSG00000034892	Rps29	138.102	253.685	170.071	264.066	111.428	255.3	133.795	294.503	117.459	288.602	124.948	298.115	104.268	216.566	203.296	180.752
ENSMUSG00000060181	Slc35e3	14.8732	3.98307	13.877	11.1366	14.1652	6.03217	13.7756	6.2306	14.2716	6.09345	12.5273	5.86979	13.8678	7.81235	11.1731	4.75433
ENSMUSG00000072612	Gm10382	4.81991	7.21583	7.39408	10.5692	2.34757	5.42987	5.40309	7.33136	2.95803	4.32602	9.90202	8.92571	3.57833	7.62982	6.1134	7.92522
ENSMUSG00000017493	Igfbp4	25.682	63.9269	67.3524	83.1869	27.3062	54.3928	67.2703	101.262	36.7718	66.965	66.8333	68.3224	35.9662	48.4005	64.3002	27.0319
ENSMUSG00000096979	Gm26880	4.14098	8.63663	5.01499	8.60142	4.74372	9.16336	4.96274	9.94489	6.13986	11.2417	6.56861	13.8806	2.41768	7.30976	3.68977	10.467
ENSMUSG00000006731	B4galnt1	42.4055	63.3574	24.0452	38.9284	45.5827	47.0659	23.0113	30.1441	40.311	62.5245	29.7446	61.007	40.8691	76.922	35.3332	72.2116
ENSMUSG00000037411	Serpine1	1.8603	0.13129	0.114353	0.0151878	1.26139	0.451634	0.0868173	0.0971857	1.20904	0.305848	0.318213	0.26635	1.5636	0.406194	0.121996	0.148317
ENSMUSG00000038332	Sesn1	54.064	23.3132	52.7108	35.4254	51.2726	25.0471	48.4398	30.861	52.8407	25.9901	53.8653	22.52	44.0145	16.045	39.2289	8.79155
ENSMUSG00000034707	Gns	211.234	95.1008	142.991	111.42	237.03	96.711	165.4	129.057	210.036	97.3477	177.876	111.005	218.188	110.345	143.402	85.9757
ENSMUSG00000038806	Sde2	29.8741	59.6797	45.0666	62.5406	31.3174	63.9716	54.2541	78.3342	32.1515	63.55	50.9488	64.4676	28.0547	66.1106	45.5513	64.1922
ENSMUSG00000057322	Rpl38	21.8581	43.8403	24.9128	44.4619	19.6611	45.7797	21.2781	38.7431	17.4265	43.6498	21.953	46.2166	17.8614	38.863	34.3297	34.6308
ENSMUSG00000026358	Rgs1	18.5117	11.4359	7.20137	9.70823	10.4218	7.9324	5.08806	5.93157	11.9187	10.9787	6.51569	14.6403	15.745	7.31024	4.99913	11.0199
ENSMUSG00000020901	Pik3r5	33.7105	13.7726	13.1933	8.64795	38.2073	14.5336	16.1323	10.5201	28.6411	14.3337	18.4214	15.8097	34.0644	26.0673	13.2708	24.65
ENSMUSG00000071637	Cebpd	17.2807	27.415	44.5366	43.6639	19.5743	34.5477	49.3386	46.7023	21.7527	23.6158	36.0939	28.5444	20.3383	21.7949	46.698	20.234
ENSMUSG00000029553	Tfec	4.72538	3.25279	6.48388	2.883	4.52531	3.10124	6.29234	2.51565	4.6662	2.63895	4.95589	2.22744	4.88109	2.43932	5.00747	0.654084
ENSMUSG00000039813	Tbc1d2	4.69164	1.10846	1.09298	1.06695	3.70147	1.36395	1.33597	1.51719	3.55266	1.21261	2.00482	1.09663	3.8985	1.4313	2.33206	2.18678
ENSMUSG00000006301	Tmbim1	30.3722	17.312	21.417	11.8894	30.1847	16.9094	19.9332	13.7467	27.6685	15.8609	22.6436	14.0416	26.6241	13.4979	18.6663	10.9396
ENSMUSG00000051236	Msrb3	0.160187	0.76529	0.215021	0.939559	0.262148	0.718297	0.548502	1.5137	0.04301	0.7604	0.41884	1.02476	0.231241	1.32591	0.688176	2.73307
ENSMUSG00000048027	Rgmb	14.4178	6.80785	12.898	8.20883	17.0617	7.5285	17.2974	9.26959	15.4104	6.43761	17.1569	5.37402	16.6638	7.53332	13.2521	4.23522
ENSMUSG00000106149	NoGeneName	1.58725	5.37193	2.57341	2.39251	1.09929	4.98555	2.269	1.33378	0.906665	2.55498	1.28167	1.32034	1.19507	2.18137	1.4663	1.79951
ENSMUSG00000062591	Tubb4a	6.36908	4.05205	7.21209	6.08691	5.87225	4.53688	9.56842	5.62944	5.5249	3.88371	13.9488	5.26034	5.44579	6.25733	14.6243	4.28271
ENSMUSG00000021639	Gtf2h2	4.62742	2.75807	1.82616	1.65737	3.96468	2.14117	1.44419	1.04545	3.76153	1.95595	1.6939	1.66321	4.6643	1.97844	2.06418	1.32683
ENSMUSG00000032578	Cish	0.131462	1.04001	0.319104	0.899586	0.0836651	1.22133	0.55799	0.918572	0.185311	1.22055	0.390996	1.35556	0.298895	1.93497	0.472211	3.01139
ENSMUSG00000028420	Tmem38b	4.44753	6.03877	3.38641	3.03672	4.73376	3.8179	2.68038	1.38118	5.93303	4.59643	2.7368	2.01815	5.9148	1.95874	5.58566	1.11449
ENSMUSG00000033319	Fem1c	19.1268	51.7556	25.2562	42.0766	21.0899	48.9702	33.1271	45.2689	23.1297	45.4383	31.7122	43.7069	25.9413	51.763	27.7722	56.7785
ENSMUSG00000024538	Ppic	6.41319	3.05225	13.5584	9.96888	5.76209	6.73729	16.8599	10.9831	8.15385	7.28158	12.86	6.33503	12.3892	8.54929	16.828	7.15162
ENSMUSG00000001700	Gramd3	22.4877	9.84439	26.0295	15.2926	21.8675	14.6645	25.4809	14.0972	21.964	8.19038	22.2411	10.699	19.5716	8.57152	20.2085	9.39999
ENSMUSG00000019528	Gyg	17.5079	7.44175	11.3146	7.33	16.1552	6.65872	10.6563	8.19319	14.7849	7.82598	10.3554	7.79647	18.0382	6.67285	11.7676	7.15049
ENSMUSG00000052160	Pld4	231.287	485.457	276.549	492.095	256.734	544.479	314.944	594.621	242.301	490.791	263.341	505.304	243.876	462.832	244.139	518.377
ENSMUSG00000033446	Lpar6	8.51239	7.75348	3.29221	3.7475	6.73251	8.07098	3.11791	3.62001	6.03654	6.01445	2.24041	2.62033	6.24137	7.05253	2.56664	3.64047
ENSMUSG00000037455	Slc18b1	3.52733	1.21302	2.59069	2.126	3.47023	1.13369	3.72274	1.69334	3.77799	1.35483	3.65089	0.962045	3.36201	0.690948	3.92186	0.554809
ENSMUSG00000037443	Cep85	2.20754	6.77799	3.78244	6.05579	2.96559	6.85458	3.69109	6.05827	2.62835	5.76948	3.93072	5.72086	1.88752	6.14236	2.98387	4.80982
ENSMUSG00000099398	Ms4a14	11.0394	9.94577	11.8026	5.60376	9.22838	8.84855	10.1312	5.4204	10.0939	5.33617	9.55656	4.57086	11.4568	6.32943	9.36134	1.6403
ENSMUSG00000060012	Kif13b	4.82714	1.51787	2.46106	2.49606	3.61625	0.984036	3.86968	2.58135	3.41747	0.8039	2.37714	1.53054	5.20592	2.46796	2.84253	1.66196
ENSMUSG00000082515	Gm12902	1.12998	4.06335	0.707834	2.96134	2.15743	6.52298	2.63321	4.56189	1.41586	4.04926	2.75758	0.887747	0.761229	1.76	3.39814	1.4281
ENSMUSG00000027381	Bcl2l11	5.16135	11.0437	4.3875	4.12267	6.22023	9.41372	4.90548	4.96796	5.76817	9.02949	4.61899	4.41896	6.54823	13.1645	3.74459	9.1832
ENSMUSG00000005667	Mthfd2	1.34515	4.65661	2.52786	3.17447	2.12743	4.71556	3.04774	3.08626	2.45273	4.63065	4.1156	5.55999	2.27222	6.07905	3.4012	10.4477
ENSMUSG00000032440	Tgfbr2	58.6398	30.5497	63.65	41.3158	68.0099	28.5632	66.239	43.3204	59.5106	25.8113	73.122	28.6645	61.0776	32.8334	55.1977	16.497
ENSMUSG00000024168	Tmem204	1.80956	0	2.52971	0.424109	2.40159	1.00319	2.11576	1.35692	2.19824	0.60388	2.58498	0.36408	2.22995	0.618691	2.16787	0.460184
ENSMUSG00000061477	Rps7	65.7537	137.103	76.9624	127.228	57.7103	137.559	68.8196	103	64.2823	138.515	63.8699	124.336	56.1139	115.467	91.215	133.864
ENSMUSG00000109812	NoGeneName	1.85509	1.24215	0.300531	0.558809	2.25946	1.31552	0.447201	1.13233	2.28434	1.87552	0.819566	1.50767	2.65025	1.13583	0.512987	1.27332
ENSMUSG00000073478	D730003I15Rik	1.98494	4.28263	3.25194	6.71359	1.02032	4.79267	1.93153	3.50885	1.19573	2.7855	1.49046	2.99889	1.18289	1.66473	2.39788	2.89456
ENSMUSG00000001627	Ifrd1	23.5172	54.2448	31.0755	45.497	26.8609	62.9911	37.3745	53.4129	28.5021	59.6345	36.9324	53.8378	27.5582	55.4377	31.0114	50.017
ENSMUSG00000034168	Irf2bpl	17.0483	6.20472	10.1157	8.50281	15.8524	5.49108	13.1084	11.1566	17.5455	6.42822	15.5746	11.0185	16.81	11.1911	11.6788	10.0648
ENSMUSG00000026288	Inpp5d	17.2538	9.06672	8.70656	5.9235	16.8651	8.74021	10.2493	7.2716	14.8822	6.84426	11.3572	7.38263	17.5994	12.1469	9.92919	8.43308
ENSMUSG00000020275	Rel	16.3262	36.9948	19.7211	21.7832	15.5699	36.7662	29.5112	28.2259	18.5025	29.149	21.6752	23.0108	20.3388	52.8464	17.5381	63.1323
ENSMUSG00000028495	Rps6	22.4177	50.081	27.5534	38.0698	21.8942	47.0495	26.2246	38.2612	20.9281	48.4022	26.2273	43.6529	21.8693	45.2134	32.2085	48.2394
ENSMUSG00000026123	Plekhb2	46.1098	18.0281	43.7763	25.6232	51.9562	21.0738	44.1468	24.6823	46.4748	19.9009	51.8559	28.9121	45.8127	27.9469	36.83	27.2595
ENSMUSG00000078439	Smim24	0.771286	2.18413	1.76649	1.85287	0.414165	2.03487	1.011	1.66168	0.588909	2.77959	1.05875	1.24976	0.194846	1.75693	1.59462	0.959543
ENSMUSG00000033871	Ppargc1b	2.14459	0.444913	1.56557	1.02319	2.09453	0.482104	2.50427	1.12195	2.10838	0.806128	3.21565	0.738743	1.91705	0.647505	2.34821	0.50038
ENSMUSG00000024401	Tnf	74.5856	168.856	113.079	109.435	84.643	217.211	133.51	162.441	84.2052	166.351	102.116	119.974	83.1939	149.859	100.211	91.1246
ENSMUSG00000040820	Hlcs	0.478126	1.13739	0.633566	1.30657	0.397917	1.40657	1.00399	2.35286	0.414754	1.294	0.830229	2.18154	0.631805	1.81021	1.1429	2.78894
ENSMUSG00000037894	H2afz	66.5568	120.79	70.1226	99.8744	68.3836	141.551	76.4589	103.204	74.3782	142.622	65.2761	142.449	64.8443	156.21	97.9391	243.423
ENSMUSG00000027203	Dut	2.22368	6.58672	2.47896	3.62167	2.12279	5.14004	2.409	3.05486	2.19594	5.8935	1.89702	5.15213	2.36128	5.88207	4.2692	6.03749
ENSMUSG00000030717	Nupr1	57.8597	24.7837	41.7685	27.2409	49.7244	25.5879	41.639	31.8801	42.4008	21.5535	38.0077	23.1979	43.1067	16.5482	41.8399	12.185
ENSMUSG00000038418	Egr1	51.2718	65.3678	109.96	115.418	43.449	84.8574	82.1315	125.045	40.7709	56.4608	74.0049	83.9888	38.4297	50.0252	50.943	50.6782
ENSMUSG00000015143	Actn1	2.68974	0.837801	0.961097	0.512956	2.07948	1.29163	1.02153	0.635297	2.58107	0.851557	1.64678	0.446438	2.23946	1.16831	1.70889	0.789996
ENSMUSG00000021549	Rasa1	16.5035	8.81007	17.8022	11.1471	16.2884	9.52336	20.196	10.6767	18.9466	10.5587	25.8797	12.9465	17.3153	8.24528	19.6498	7.49905
ENSMUSG00000029050	Ski	8.88778	3.81815	4.71374	3.23675	7.95662	3.67693	5.85439	3.89357	8.41164	3.45901	4.18608	3.13747	7.61596	3.30021	5.00503	3.06277
ENSMUSG00000029752	Asns	0.685721	0.720777	1.61905	0.383989	0.486761	0	1.29943	0.343996	0.479171	0.206204	1.54469	0.290081	0.87059	0.147883	2.32651	0.233325
ENSMUSG00000104388	Gm37033	0.87457	4.77076	0.728732	1.5424	0.378064	2.26829	1.0712	0.430455	0.666802	1.33854	0.72485	0.700052	0.817052	1.94304	0.661648	1.15744
ENSMUSG00000036452	Arhgap26	0.434486	1.89089	0.806033	1.74529	0.400593	1.47112	1.07554	1.33891	0.526959	1.44083	0.764646	2.04807	0.536613	2.20372	0.830124	3.40029
ENSMUSG00000040249	Lrp1	42.2927	21.0225	20.5032	16.2182	40.816	22.0073	28.5283	19.0475	40.5725	16.9666	23.4009	18.4978	49.8882	26.9179	19.994	25.8361
ENSMUSG00000097101	1810034E14Rik	3.60537	3.21525	7.18186	2.72959	5.18564	3.33	7.48945	2.68715	4.8789	2.9598	7.25873	3.96548	4.85762	2.06652	6.64992	1.95933
ENSMUSG00000084796	Mir142hg	4.05785	19.4558	10.1675	10.2405	9.46916	14.1523	6.75432	9.66124	5.93187	12.338	8.66485	17.5338	8.2009	17.2755	9.03924	10.6842
ENSMUSG00000031788	Kifc3	3.71207	1.27103	2.46089	1.95309	4.62776	0.875781	4.04751	1.95069	3.5551	1.20697	4.3389	2.4758	4.25309	2.13582	2.81035	2.05194
ENSMUSG00000029033	Acap3	3.83085	0.713823	3.2723	2.03224	5.29274	1.86211	5.21016	1.76503	3.61966	1.44312	5.06743	2.42138	4.15963	2.03086	3.78425	2.33054
ENSMUSG00000062691	Cebpzos	14.368	9.82391	6.4016	9.25149	14.2957	7.08213	5.6589	6.85006	13.5022	7.64729	5.18542	7.15431	13.7008	5.23224	6.96469	4.15604
ENSMUSG00000000686	Abhd15	1.96944	1.31017	0.524314	1.29033	1.94276	1.49217	0.262252	0.0305804	1.35723	0.801982	0.300386	0.541538	2.22229	1.38038	0.329033	0.777824
ENSMUSG00000104835	NoGeneName	1.94534	4.52007	3.30424	6.07858	1.57138	5.34494	2.31644	3.34592	1.125	3.65617	2.6704	4.1441	1.81455	3.4262	1.80004	4.60984
ENSMUSG00000058624	Gda	4.25699	7.63977	7.49371	10.4791	3.54959	5.84487	6.21974	10.3924	5.07468	6.61299	5.60314	10.3119	5.66918	8.30037	7.78382	12.6034
ENSMUSG00000064372	mt-Tp	14.4818	7.81134	8.50457	6.32539	6.91236	9.79664	3.61575	11.8054	15.3103	21.2298	8.28303	21.3324	3.65844	3.38341	1.81459	12.011
ENSMUSG00000021270	Hsp90aa1	10.7505	23.843	16.9236	23.5507	11.0925	29.3875	20.5028	25.2118	11.9046	24.4986	17.0209	23.9668	11.5738	22.6258	17.3115	24.6088
ENSMUSG00000069607	Cd300ld3	2.70471	8.29267	4.41399	5.34725	0.815366	8.16617	4.9759	5.17229	3.07683	6.26055	2.73573	3.18735	3.16464	2.3946	3.42473	1.07946
ENSMUSG00000027347	Rasgrp1	0.197341	1.57671	0.307111	1.28216	0.147178	0.961184	0.178609	1.36166	0.324538	1.48264	0.541785	1.68603	0.367667	2.63377	0.241091	2.32064
ENSMUSG00000024866	Acy3	0.322351	0	1.28727	1.83037	0.230795	0	0.724351	3.00318	0.151464	0.630076	1.62248	1.42452	0.325735	0.979053	1.29252	0.381935
ENSMUSG00000054717	Hmgb2	16.4137	34.1767	22.4105	27.8184	17.2641	35.035	20.1879	22.8004	16.3483	32.4669	19.1284	31.0023	17.3144	45.1907	66.6346	37.1097
ENSMUSG00000050390	C77080	1.20872	0.429249	1.62247	0.839469	1.08938	0.325039	2.38431	0.272782	1.23466	0.498932	2.13672	0.51314	1.73728	0.547252	2.12225	0.256183
ENSMUSG00000049709	Nlrp10	0.134641	0.784343	0.22772	1.17618	0.0771195	0.378902	0.295827	1.12894	0.202445	0.552663	0.197145	1.45974	0.163265	1.33376	0.107973	1.91434
ENSMUSG00000034723	Tmx4	7.47744	3.56091	3.12867	3.20297	7.31274	3.98939	3.82518	2.35798	7.12636	4.22291	4.40342	3.03932	8.30472	5.58492	4.17704	3.58488
ENSMUSG00000014243	Zswim7	2.15396	12.1545	8.40698	9.55289	4.58699	9.68422	5.12972	7.56384	7.16246	11.4971	5.61028	9.76279	4.52058	10.0647	7.30796	9.42314
ENSMUSG00000009293	Ube2g2	19.6048	10.2606	23.6191	8.45002	27.1465	11.7304	24.232	13.9246	23.6527	9.64325	26.142	10.751	22.1971	10.9142	20.3981	10.334
ENSMUSG00000008384	Sertad1	79.567	179.854	191.004	215.147	85.4426	216.575	209.682	254.962	119.18	193.107	202.064	204.514	93.1255	138.863	191.301	127.257
ENSMUSG00000039680	Mrps6	8.30502	13.9461	11.7789	16.2211	7.55425	13.8229	13.4586	18.5405	8.46725	14.9315	11.4004	22.2516	7.91717	11.7884	12.9589	15.5214
ENSMUSG00000056121	Fez2	51.3446	27.0669	50.3456	31.7931	48.6056	24.0732	41.2733	28.8837	47.7326	21.7964	40.9319	22.0582	45.7851	16.6624	42.4709	15.187
ENSMUSG00000024608	Rps14	37.6615	79.8769	43.9012	72.3555	35.9859	84.5595	47.9053	68.4025	33.5072	72.5326	34.434	67.1232	31.5219	60.0172	51.0994	51.6626
ENSMUSG00000048327	Ckap2l	3.44097	7.50755	2.94258	5.74164	6.79117	9.16456	4.47905	4.64657	4.50529	7.0281	3.04283	5.64966	4.72729	13.8383	5.23207	13.3762
ENSMUSG00000028041	Adam15	31.315	13.3788	21.0909	17.5002	33.6731	13.2536	23.2559	17.0102	27.9548	13.8768	22.3553	18.8507	30.7272	16.0321	20.1601	18.7181
ENSMUSG00000025147	Mob2	8.82791	4.76718	6.0708	4.57914	9.76568	3.78244	5.47859	3.20841	8.07641	4.28899	5.20612	3.23229	7.50396	3.43669	5.93683	3.09095
ENSMUSG00000023243	Kcnk5	0.360537	0.116683	1.86322	0.818878	0.653941	0.312188	1.22424	1.67947	0.745388	0.140943	2.3096	0.382386	0.801508	0.40432	1.08423	0.307569
ENSMUSG00000028864	Hgf	2.13058	0.953609	0.929977	0.415802	1.55068	0.997667	0.920548	0.295631	1.97381	0.694082	0.871181	0.658856	2.45833	1.08734	0.886103	0.379555
ENSMUSG00000031250	Tnmd	0.806772	2.12748	1.7688	2.036	1.36919	3.97803	0.895251	0.501084	1.01088	6.39535	0.73831	3.48603	2.71747	4.35617	3.4146	3.14383
ENSMUSG00000052684	Jun	240.82	208.138	540.217	346.523	237.409	207.266	370.03	393.975	238.568	164.363	325.321	271.737	199.498	139.894	284.215	166.261
ENSMUSG00000029860	Zyx	13.7188	16.4807	16.3582	18.517	14.4843	17.8509	21.3632	19.6995	15.5687	18.858	22.6461	36.0591	15.9196	30.4769	21.8836	55.8239
ENSMUSG00000042293	Gm5617	11.8772	24.8867	13.0916	28.5327	13.3008	14.0917	13.0024	27.6635	7.29794	14.9561	12.3325	21.5333	7.61659	16.436	11.677	11.0416
ENSMUSG00000042684	Npl	53.8063	40.3549	76.8532	58.4215	51.6713	32.4173	61.1844	42.2842	63.6008	36.4807	66.7057	35.7673	58.9898	24.8046	81.5878	13.5675
ENSMUSG00000018821	Avpi1	33.0639	44.5656	44.0773	43.4244	35.6086	49.136	48.3603	49.695	37.9685	50.652	41.8905	72.8457	37.3102	78.6268	50.4362	141.139
ENSMUSG00000111171	NoGeneName	3.65779	3.46138	0.844157	1.17722	2.14411	0.90295	0.640886	1.91314	1.99007	1.06617	0.93962	1.6637	2.91804	1.13944	0.578942	1.09488
ENSMUSG00000104488	Gm38062	0.392084	2.60834	0.245606	0.627938	0.311913	2.05117	0.391576	0.791449	0.491278	1.14957	0.418615	0.308033	0.3962	1.22138	0.196516	0.867173
ENSMUSG00000026519	Tmem63a	6.52405	2.15202	8.55859	3.07976	9.4379	4.06033	8.8963	4.89756	7.34534	3.55587	9.03602	3.81455	7.96176	4.2913	7.43276	4.41202
ENSMUSG00000031834	Pik3r2	13.0348	5.37053	9.42684	4.99624	12.4434	3.76364	7.38189	4.90357	10.7852	4.75395	9.72033	7.76998	12.5764	7.28045	6.60935	8.42901
ENSMUSG00000070942	Il1rl2	2.84478	3.93081	1.79717	2.78121	2.28814	4.84796	1.28152	3.48491	1.92255	3.75037	1.55095	3.88025	2.28749	3.92559	1.11639	4.11932
ENSMUSG00000059852	Kcng2	0.130836	0.988004	0.153669	1.08579	0.1249	0.77887	0.130666	2.1636	0.0922141	0.959005	0.329266	1.07928	0.0661045	1.03929	0.131152	0.930116
ENSMUSG00000059479	B3gnt8	2.77619	1.39049	1.96806	0.952751	3.2418	1.4756	1.63385	1.06228	2.55067	1.62308	2.34779	0.613422	2.41709	1.38987	1.80143	0.516896
ENSMUSG00000045777	Ifitm10	1.36014	0.170616	0.267491	0.0736853	1.35883	0.194008	0.168481	0.176815	1.15929	0.103045	0.125437	0.111827	1.28919	0.0492673	0.179677	0.00999412
ENSMUSG00000097125	Gm26885	0.790362	2.55789	1.35025	2.2596	1.02887	4.43287	0.645822	2.20902	1.48548	2.73862	1.51234	2.54018	1.23429	4.16312	1.08037	4.69929
ENSMUSG00000055546	Timd4	43.312	23.5428	58.5802	53.1458	46.462	41.4426	63.9361	88.8669	36.5061	22.5829	45.2552	41.3062	40.7774	18.3604	47.6128	43.0117
ENSMUSG00000028108	Ecm1	202.947	84.2578	228.089	109.169	187.139	97.0925	191.024	135.15	197.252	112.952	231.349	196.454	173.447	103.132	186.149	151.763
ENSMUSG00000059555	Tor4a	15.8342	9.47986	14.8781	7.9179	16.8568	4.81551	16.9176	9.1652	18.3858	8.39912	18.0562	9.31356	17.2569	7.87651	11.6896	6.41736
ENSMUSG00000031903	Pla2g15	56.3261	34.2806	43.9341	31.3745	57.8642	38.4887	38.9545	34.577	55.079	35.43	36.3806	26.5244	51.9031	28.9617	31.6099	11.1466
ENSMUSG00000031668	Eif2ak3	4.56929	1.72594	4.99091	2.94058	5.75489	0.720378	4.9852	2.58757	4.739	2.38917	6.04392	2.88087	5.92354	3.10991	4.67015	3.02085
ENSMUSG00000000275	Trim25	4.52806	12.4199	4.58054	11.4711	4.30423	11.116	6.51389	9.66678	5.35977	10.8844	7.15911	12.6363	7.01916	13.172	7.19481	14.9216
ENSMUSG00000053553	3110082I17Rik	8.12445	4.42322	6.15942	4.11242	7.44175	3.23257	4.0696	1.93355	6.61216	3.88349	4.42396	3.51949	7.92841	3.02756	3.90713	2.7589
ENSMUSG00000029718	Pcolce	0.677003	1.20997	1.49062	3.05413	0.983901	3.08419	1.52381	4.67869	0.98755	2.43919	1.05417	3.25078	1.95022	3.1634	2.89688	2.9787
ENSMUSG00000024960	Plcb3	18.939	7.69281	18.3651	11.6265	25.025	11.437	26.2669	14.4706	19.1272	7.5053	26.447	10.1726	20.7715	14.1377	18.4349	9.57791
ENSMUSG00000073274	Gm14636	2.0327	4.8314	4.75162	4.37429	1.40409	5.04422	3.64752	5.45034	1.94128	3.37558	3.61456	3.62236	2.43813	3.9228	3.14754	7.20571
ENSMUSG00000037922	Bank1	0.768007	2.52278	1.83246	3.44498	0.749638	2.84873	1.55988	4.39758	0.84337	1.96501	1.03451	1.99315	0.863267	2.52414	0.934216	1.2351
ENSMUSG00000039851	4932438H23Rik	1.31462	0.182993	1.49425	0.185228	1.25498	0.367203	1.29174	0.434594	1.4546	0.290116	1.18366	0	1.77837	0.118893	1.67913	0.0803932
ENSMUSG00000049807	Arhgap23	2.53602	0.472171	0.816471	1.04584	2.60529	0.633977	1.81919	0.881505	1.9598	0.471792	1.89671	0.811613	2.57565	0.980476	1.7937	1.20191
ENSMUSG00000026991	Pkp4	1.26675	0.581084	2.90409	1.32726	1.47879	0.667452	2.28906	1.75467	1.52206	0.791454	2.18932	1.11631	1.61038	0.534626	2.32736	0.397891
ENSMUSG00000026749	Nek6	12.2155	7.53616	7.02714	5.69885	11.6539	5.49376	5.61523	4.8292	10.8353	5.91649	6.66788	5.3642	10.2735	4.92332	5.97582	3.59919
ENSMUSG00000025290	Rps24	29.1827	61.6602	34.232	51.8791	24.7534	54.8237	32.9504	58.0125	29.9571	62.3093	30.2785	60.128	26.1081	54.8916	39.408	51.8872
ENSMUSG00000086109	Gm13391	0.639783	1.67617	0.77291	0.958103	0.349004	3.26456	0.638954	1.44756	0.429452	1.96513	0.334567	1.18478	0.184714	0.768725	0.274856	0.173267
ENSMUSG00000056529	Ptafr	32.2803	63.6752	60.443	62.3991	33.9356	72.4413	57.7495	81.3673	33.9391	68.4082	50.6898	58.0433	30.6647	72.2698	42.7545	69.6981
ENSMUSG00000038855	Itpkb	3.74114	9.03845	1.59975	3.82587	2.99399	5.15256	3.18815	3.6837	2.30522	3.82047	2.72664	4.11833	4.0747	6.55278	2.20071	6.28534
ENSMUSG00000049588	Ccdc69	1.15175	2.70107	1.22337	3.10589	0.908282	3.52307	1.7504	2.75255	0.800001	2.44701	1.09984	3.48171	1.16384	2.71427	1.7569	3.37008
ENSMUSG00000030956	Fam53b	3.63588	1.00094	1.68522	1.05485	2.94117	1.14842	1.99515	1.17875	2.70757	0.676836	2.03947	1.10387	3.18058	1.08283	1.79786	0.584911
ENSMUSG00000049313	Sorl1	0.0294333	1.2595	0	0.205695	0.206051	1.03007	0.107782	0.457024	0.0737593	0.901319	0.0897853	0.474035	0.674157	3.18156	3.09796	1.51584
ENSMUSG00000026471	Mr1	3.6351	1.09166	2.19707	1.49334	3.52645	1.2867	1.69745	1.37296	3.20372	1.1522	2.1758	1.1462	3.69312	1.14767	1.90073	0.828809
ENSMUSG00000038204	Asb10	1.39724	0.0741303	0.79633	0.220104	1.77117	0.148754	1.12092	0.256078	0.990165	0.402945	0.922318	0.215943	1.68965	0.214059	0.367374	0.043423
ENSMUSG00000053040	Aph1c	1.76191	4.39817	2.65653	5.9597	1.77976	5.89851	2.84404	4.27547	2.61838	4.40494	2.75607	5.14248	2.58779	4.88223	2.52603	7.12689
ENSMUSG00000064039	Ccr1l1	1.45625	1.45876	1.46605	0.99953	2.28386	1.12586	1.35048	0.290724	2.5415	0.304973	0.666337	0.122579	1.99708	0.194416	1.87684	0.492977
ENSMUSG00000030830	Itgal	0.344996	1.31693	0.10473	0.445111	0.369878	1.39025	0.0689098	0.62305	0.47883	1.12044	0.189432	0.656749	1.16385	2.6636	0.686339	2.62113
ENSMUSG00000031613	Hpgd	405.507	258.881	313.444	226.82	449.438	326.979	332.147	266.944	433.897	269.816	292.683	184.2	347.284	163.787	226.541	107.517
ENSMUSG00000030256	Bhlhe41	2.61258	0.708925	1.73193	0.658076	1.77491	1.21439	2.11297	0.477841	2.25935	0.939868	1.33479	0.528871	1.7816	0.659065	1.30141	0.319044
ENSMUSG00000036446	Lum	3.56548	1.82861	3.40511	13.3778	4.57548	8.47752	7.23846	23.4702	8.89841	13.4813	4.65367	13.5006	17.6601	14.0929	13.2417	13.186
ENSMUSG00000067924	Cxx1b	6.00517	3.71704	4.62505	3.52594	6.29659	3.7294	6.98056	3.85209	6.846	3.36741	8.46859	2.55227	7.16247	2.116	11.0525	3.35929
ENSMUSG00000090942	F830016B08Rik	1.32431	0.396846	2.48869	0.642707	0.632113	0.676881	2.20432	0.479807	1.00252	0.719035	1.00994	0.216754	1.67276	0.378158	1.88064	0.244081
ENSMUSG00000021508	Cxcl14	5.0563	2.15315	1.06272	3.83583	3.42964	3.02444	2.85709	1.67353	5.00172	2.99096	0.913269	3.3713	7.05901	5.40919	3.0011	2.71167
ENSMUSG00000021250	Fos	242.181	460.246	499.389	562.594	207.522	379.099	254.789	553.694	214.411	360.456	306.195	440.594	240.514	320	281.288	322.937
ENSMUSG00000093622	Gm20703	9.76578	21.0703	14.8002	13.7598	7.81904	19.0945	12.8993	14.6746	7.99316	16.9333	10.3785	12.6221	8.27663	17.3696	16.7367	11.9441
ENSMUSG00000034265	Zdhhc14	27.9948	16.3392	31.0604	17.1425	36.5373	12.5164	32.197	19.3705	31.4305	14.8024	36.4156	15.7839	33.4821	16.7378	26.6183	8.48839
ENSMUSG00000018199	Trove2	3.50636	0.730502	3.58226	1.36135	3.55094	1.31526	3.69636	1.6247	3.9663	1.4777	3.72664	1.60691	3.20572	1.27431	3.18938	1.28371
ENSMUSG00000079017	Ifi27l2a	442.964	496.231	725.857	517.623	437.121	353.564	691.709	372.174	476.831	414.225	579.895	345.742	451.849	289.358	876.516	150.469
ENSMUSG00000054293	A630033H20Rik	11.7362	4.90977	9.33973	5.43902	10.6461	3.55442	9.53084	4.19905	12.9345	7.20503	12.7471	5.86981	10.6233	5.25219	9.37848	4.61688
ENSMUSG00000022043	Trim35	28.7728	11.1795	26.4626	15.9756	33.3799	13.8823	25.3262	20.4226	31.2553	14.9656	31.1065	16.8386	27.7443	16.4525	24.076	16.5255
ENSMUSG00000022372	Sla	12.6275	6.71773	5.36288	5.77124	12.4719	7.31141	4.88464	5.6017	9.98313	7.65769	4.94391	5.04449	11.1681	8.45553	5.10122	6.14488
ENSMUSG00000020122	Egfr	1.4939	1.2574	4.01055	2.73193	1.73955	2.50538	4.95954	4.22888	2.23695	1.2755	4.94269	2.45693	2.38878	1.82566	4.55835	1.22929
ENSMUSG00000022096	Hr	0.142436	0.00768291	0.0736097	0.230191	0.0543897	0.185003	0.0640134	0.185781	0.127161	0.132245	0.110797	1.34283	0.151128	0.399334	0.0785294	3.17952
ENSMUSG00000027318	Adam33	2.01057	0.25139	1.50726	0.681717	1.86245	0.498587	1.34767	0.550331	1.31394	0.259523	1.1258	0.191592	1.81811	0.319066	0.847459	0.128421
ENSMUSG00000057329	Bcl2	3.40932	2.00851	2.48779	0.823776	3.54317	1.97593	2.40275	1.45298	2.65855	1.40604	2.77703	0.812087	2.79762	1.67214	2.25413	0.859467
ENSMUSG00000008683	Rps15a	2.50561	6.35058	2.4856	4.68684	2.19631	5.55507	2.58609	5.2935	2.45092	6.52701	2.58281	5.82861	2.23072	5.18802	3.74416	5.30623
ENSMUSG00000026821	Ralgds	6.30842	13.1885	13.8932	13.4267	8.99349	12.5933	22.0284	17.829	7.93657	12.0923	20.0854	13.6355	8.93617	13.9439	14.6158	8.29719
ENSMUSG00000037824	Tspan14	102.075	46.5737	63.3118	49.4006	106.005	42.1141	65.678	55.5614	91.0431	51.1488	69.5105	47.4114	93.4906	49.0929	60.7152	36.0448
ENSMUSG00000022111	Uchl3	84.8601	42.9561	71.7624	47.6719	81.01	41.1206	61.8024	42.8139	83.5501	39.0432	68.2205	41.232	68.3369	29.0376	70.5387	34.0308
ENSMUSG00000098274	Rpl24	9.70745	19.115	11.0445	21.5068	9.26703	22.4699	12.323	18.2513	9.78198	22.6893	11.2919	17.8487	9.33661	18.4171	15.3584	19.1234
ENSMUSG00000025491	Ifitm1	0.389804	2.22272	1.04648	1.75124	0.691077	2.41093	0.722983	0.726319	0.313985	0.870766	0.917295	0.984348	0.787791	3.22651	1.6188	3.69484
ENSMUSG00000022205	Sub1	39.9587	73.6007	52.701	64.009	30.6152	77.6825	44.948	66.6244	38.7865	76.1309	47.0526	79.4594	37.2703	71.8988	59.7299	96.069
ENSMUSG00000030707	Coro1a	39.4779	86.5034	34.982	61.7905	41.1878	76.5856	38.5288	49.8953	39.9563	78.1009	35.9005	72.6347	42.3549	94.2508	51.4915	105.947
ENSMUSG00000035215	Lsm7	13.4761	32.4304	15.8279	19.6959	12.3699	25.5257	13.7174	17.6252	9.74159	23.8079	12.3325	26.2644	11.2607	18.8907	18.7043	17.9322
ENSMUSG00000047379	B4gat1	25.5681	12.216	27.2163	11.6623	29.4149	7.35398	26.0112	20.711	26.7159	16.8334	27.3255	12.291	26.6797	14.2028	23.9571	9.37776
ENSMUSG00000104030	5330406M23Rik	4.17025	12.9965	3.91844	5.1609	2.65403	9.90518	4.107	3.02182	2.61264	4.41527	2.80927	3.0715	3.10199	2.70641	3.01912	3.07445
ENSMUSG00000056596	Trnp1	0.93256	0.83836	1.9959	0.950429	1.187	1.00938	2.89754	1.83417	1.36324	0.556968	3.08181	1.5874	2.30352	0.629421	2.49284	0.54019
ENSMUSG00000061666	Gdpd1	14.226	10.754	18.0016	14.5591	12.9858	13.4872	18.3558	10.0128	14.4422	11.8736	19.8608	6.54675	16.3166	9.1704	18.9965	3.39572
ENSMUSG00000038074	Fkbp14	1.7051	0.759768	1.64858	0.172698	1.81647	0.815788	1.271	0.667653	1.85781	0.398491	1.56041	0.422259	1.66057	0.173203	1.54821	0.105406
ENSMUSG00000033066	Gas7	3.16273	7.83544	6.72614	7.33709	3.0526	7.19954	8.95237	9.14896	3.85341	6.34134	8.53913	7.42675	3.4961	6.11818	7.90551	5.17311
ENSMUSG00000054589	Gm9949	1.63898	4.21626	2.96157	3.96487	1.20356	2.18337	2.14051	4.22849	1.42175	4.18932	5.53809	3.26861	0.636995	1.76732	3.66503	1.31454
ENSMUSG00000004609	Cd33	58.4266	41.0313	44.5409	31.451	54.3277	44.3819	48.7926	37.2509	54.5864	36.8484	45.9384	24.6049	59.3001	32.8812	41.1219	14.8932
ENSMUSG00000024066	Xdh	85.1663	38.4505	49.813	45.2719	68.3283	29.7351	48.5091	47.0749	65.1259	32.8698	57.0812	37.7026	85.6061	44.8979	55.1036	35.1128
ENSMUSG00000027660	Skil	15.2136	12.0618	5.26217	6.43401	13.8221	11.2322	7.29168	6.14071	13.866	10.7297	7.69667	6.72168	14.9698	15.0146	5.85107	12.8972
ENSMUSG00000056501	Cebpb	111.124	327.796	553.97	921.57	400.695	1017.91	518.497	575.04	330.032	822.795	385.596	973.312	717.583	1039.54	655.178	403.744
ENSMUSG00000019872	Smpdl3a	90.8303	46.9808	61.8452	50.3812	82.8208	43.4699	61.3621	43.4103	85.5003	44.4964	61.5232	44.4573	94.7842	35.3978	56.4768	33.3052
ENSMUSG00000040447	Spns2	1.0754	0.301951	0.429102	0.218772	1.84227	0.19134	0.48551	0.356839	1.16289	0.187165	0.47185	0.295125	2.20315	0.660819	0.41348	0.139636
ENSMUSG00000037060	Prkcdbp	10.2165	4.32984	8.91393	4.33491	10.0317	2.52756	7.94398	6.73072	8.64083	4.92104	7.81356	3.18189	10.6925	5.4558	9.94861	3.87358
ENSMUSG00000013076	Amotl1	1.40909	0.101958	0.484392	0.0750568	1.30415	0.139496	0.652146	0.200118	1.07388	0.0587795	0.54254	0.0810016	1.25024	0.104383	0.49954	0.13845
ENSMUSG00000030761	Myo7a	4.53734	1.90564	2.6063	1.94357	4.86107	1.67495	4.48772	2.34482	4.12126	1.20419	4.59319	2.25028	4.59677	1.99462	2.67513	1.58305
ENSMUSG00000024180	Tmem8	3.05485	6.41496	10.6489	9.35035	3.33922	4.0637	8.19782	9.88512	4.60202	6.97387	9.73133	6.76026	5.91463	6.75576	10.3088	6.67538
ENSMUSG00000023349	Clec4n	10.6345	25.9172	24.7179	21.7204	12.1248	30.7101	25.0898	18.5717	16.9124	36.292	23.7391	20.9545	13.8786	21.0634	24.4494	9.67202
ENSMUSG00000044042	Fmn1	2.68189	1.4278	1.13816	0.882355	2.10949	1.21892	1.49187	0.584082	2.56393	0.937976	1.52996	0.711444	2.15864	0.802885	1.12888	0.41451
ENSMUSG00000009927	Rps25	17.0665	35.4307	24.4326	32.3524	15.2808	35.4487	18.4244	35.7265	16.2762	34.8666	16.5878	33.954	15.9656	30.7144	24.7958	29.6684
ENSMUSG00000026817	Ak1	1.54082	0.729339	0.694345	0.384574	1.4409	0.374391	1.00495	0.234368	1.77303	0.537808	0.978416	0.463207	2.01774	0.484879	1.02444	0.178837
ENSMUSG00000049792	Bag5	18.0573	6.59157	19.1608	13.5177	16.2185	8.17276	17.1409	13.6066	18.5098	9.05443	19.4572	9.65923	15.2601	9.79547	17.2046	8.07538
ENSMUSG00000026526	Fh1	11.3618	20.7271	25.3223	29.453	12.4776	16.7968	21.6793	28.3562	13.5201	19.7028	19.3582	24.1931	13.3712	23.3724	21.5747	25.9825
ENSMUSG00000074170	Plekhf1	1.15224	1.21816	2.81493	2.1339	1.51795	1.42175	3.38319	1.50287	1.45097	0.990966	3.77497	1.62942	2.02594	1.14141	3.97328	0.851896
ENSMUSG00000060260	Pwwp2b	3.59917	2.11663	1.67918	1.82315	3.98467	2.21835	2.02191	0.978005	3.74637	1.9786	2.16153	1.42854	3.32125	1.5533	1.77888	0.888426
ENSMUSG00000025150	Cbr2	591.892	308.611	543.169	441.089	537.891	290.291	438.258	517.134	535.535	287.642	386.088	303.819	536.534	188.116	465.043	115.089
ENSMUSG00000028982	Slc25a33	6.81302	10.886	5.37496	4.94097	5.15405	14.7484	5.52038	9.521	8.45613	12.94	7.29363	6.81688	6.75464	13.4547	5.21876	11.2708
ENSMUSG00000027330	Cdc25b	5.5742	3.03491	3.43027	3.05197	6.15822	2.73342	6.02436	2.10897	5.02928	1.70082	4.53838	2.02001	5.89716	3.37501	3.88252	1.86043
ENSMUSG00000051969	Tlr11	0.136934	0.485374	0.551425	0.666461	0.0933726	0.741069	0.273514	0.801897	0.0919166	0.53531	0.232727	0.968217	0	0.420471	0.117656	2.39196
ENSMUSG00000109036	NoGeneName	3.39334	7.55754	3.59986	4.78115	3.23939	12.4403	4.59148	4.48715	2.57167	5.6699	4.50782	3.99887	3.98202	5.4217	6.80309	6.01788
ENSMUSG00000001123	Lgals9	95.2881	65.1807	53.4381	45.6778	92.635	54.249	46.4872	54.4311	84.2436	54.0647	51.0088	41.8154	83.7636	41.8651	50.538	30.434
ENSMUSG00000034641	Cd300ld	57.914	123.915	68.0751	136.033	53.9295	109.09	61.9605	99.5805	61.793	141.836	74.9882	130.012	67.6037	121.572	73.3144	102.097
ENSMUSG00000032518	Rpsa	9.48826	21.8702	12.6993	18.6194	11.4582	24.4732	11.1828	21.779	10.818	20.8498	9.90556	20.9969	10.5208	23.2416	11.9924	21.5624
ENSMUSG00000092202	Stk19-ps1	6.09942	4.80843	15.2095	12.091	7.39034	8.12534	13.1202	8.30521	9.70014	6.87812	12.8812	6.35847	6.87462	4.82316	13.169	5.33674
ENSMUSG00000022636	Alcam	2.74784	4.18321	2.47151	2.98474	1.69988	4.6276	2.07627	3.02318	2.57377	3.54239	1.36487	4.23946	2.52094	4.32496	1.27757	8.54207
ENSMUSG00000045502	Hcar2	4.46177	7.72837	4.60569	8.83833	4.43931	12.2433	6.40156	8.66487	4.54725	6.94001	5.0608	8.6645	2.98457	5.63785	4.09459	11.4367
ENSMUSG00000079164	Tlr5	0.981058	1.32585	3.41377	2.30736	0.813047	1.727	3.35927	3.57565	0.942207	1.73848	2.70329	1.56267	1.22013	1.79336	2.72334	0.797072
ENSMUSG00000044197	Gpr146	6.25135	3.04153	9.0513	7.56473	6.46437	4.06885	8.50591	6.97324	5.88256	3.80513	7.82493	4.89477	6.47808	3.34057	7.7721	2.9349
ENSMUSG00000066800	Rnasel	4.64505	4.6154	15.2683	6.99785	4.4732	4.26911	7.08062	8.69306	5.85084	3.74323	7.3309	4.27351	5.25377	3.53368	7.35201	2.45636
ENSMUSG00000060636	Rpl35a	6.54216	13.2699	6.14713	12.662	5.46	12.678	5.75121	11.3506	5.26442	12.6535	5.66435	13.1801	5.16595	11.1843	8.16802	10.3414
ENSMUSG00000079435	Rpl36a	4.7919	9.80409	6.21042	9.35364	4.16437	9.51476	4.62067	8.31295	3.63359	9.88313	4.35502	9.6583	4.00734	8.6784	6.72488	9.11554
ENSMUSG00000020773	Trim47	43.0083	27.7053	52.6585	26.9719	48.6648	27.0541	54.7839	28.2186	51.8185	29.2802	59.3	31.0235	40.6984	25.712	50.5845	18.6609
ENSMUSG00000035629	Rubcn	1.47682	0.644261	1.80525	1.04745	1.69267	0.751632	2.88971	1.21629	1.61842	0.574612	3.13938	1.00384	2.07241	0.934512	2.19971	0.688949
ENSMUSG00000035863	Palm	3.98808	2.22706	0.661284	1.02466	3.40404	0.685576	1.19487	1.20207	3.1305	1.23806	1.41693	1.2164	3.22396	1.86349	2.63379	1.28971
ENSMUSG00000022747	St3gal6	2.58965	3.84823	6.94532	5.34096	2.42304	4.61282	6.79972	5.18478	2.77206	3.71254	5.8698	2.9406	2.26157	2.08353	4.92535	1.05664
ENSMUSG00000017716	Birc5	3.62636	8.12974	2.66202	5.09828	5.62547	9.59801	4.32901	3.90638	3.22148	6.67285	1.55561	4.60733	3.34951	8.49883	5.62308	6.63296
ENSMUSG00000026170	Cyp27a1	19.2098	36.5611	40.595	44.1858	17.7804	36.3665	45.7009	46.239	15.3067	25.5554	35.1259	27.5009	17.5293	29.3514	24.4913	21.3586
ENSMUSG00000044134	Fam109a	4.36161	1.22532	5.10147	3.27436	4.27216	2.11456	6.60201	3.9365	3.69319	2.44215	6.15355	4.14942	4.08603	3.43918	4.98699	3.44521
ENSMUSG00000078920	Ifi47	2.61699	6.06385	4.58893	7.84041	2.1288	6.10396	4.47257	6.79925	2.47662	7.07848	2.78283	5.14721	2.25338	4.09906	3.75023	3.21426
ENSMUSG00000053559	Smagp	29.8556	17.2654	35.7086	21.3527	28.0566	16.4409	35.8035	30.0379	31.0646	18.5421	31.9557	18.3803	31.5216	11.639	30.2778	6.01291
ENSMUSG00000032300	1700017B05Rik	18.2911	11.7553	14.7345	9.51912	16.9368	10.8653	15.501	10.5572	18.7272	12.5402	17.1161	8.76772	17.9858	9.57372	14.5375	4.58938
ENSMUSG00000040631	Dok4	1.00711	0.509968	1.87328	0.718185	1.53042	0.0667387	2.11424	0.402116	1.54518	0.482086	2.29471	0.435975	1.05922	0.883551	1.77185	0.545492
ENSMUSG00000028995	Fam126a	7.81881	3.30477	8.83143	5.37174	7.65618	4.6227	10.3545	5.38863	6.89239	3.64952	11.0774	4.75195	8.36786	5.68393	8.85384	6.92374
ENSMUSG00000049091	Sephs2	20.5577	14.5445	12.1447	12.313	19.5186	10.6733	10.961	8.1489	19.1095	10.2906	10.0439	7.48448	17.1142	13.5367	14.1292	7.65711
ENSMUSG00000002108	Nr1h3	2.31009	1.81039	0.681353	0.87779	2.29428	1.16609	0.724199	0.540459	2.36559	0.8403	0.654125	0.585968	1.97843	1.13267	0.695739	0.382946
ENSMUSG00000075702	Selm	15.636	5.51211	15.5582	6.84632	13.3129	8.27486	10.0908	7.8026	13.358	7.05866	12.4458	6.11187	12.5392	5.92392	16.4055	4.29698
ENSMUSG00000024056	Ndc80	4.02262	8.20351	3.36551	4.52491	5.47084	7.81328	3.63217	7.64934	4.50521	6.89333	2.01713	4.74043	4.39894	9.06342	4.75043	7.62585
ENSMUSG00000014361	Mertk	23.7027	13.8156	22.5141	13.3678	24.0733	11.3091	22.5202	15.3952	23.3259	10.7497	22.8097	12.0289	26.491	12.2095	17.4964	5.38427
ENSMUSG00000066357	Wdr6	6.93388	3.48865	4.76321	3.30856	8.39927	4.44626	7.21586	2.44283	7.52908	3.70149	6.18551	3.43328	7.15387	4.98246	5.63644	3.6176
ENSMUSG00000029521	Chek2	3.33704	1.09472	1.44858	1.3979	3.68863	1.26734	1.24733	0.7636	2.8242	1.62113	1.37513	1.05787	3.27347	1.49545	1.56496	1.23934
ENSMUSG00000021591	Glrx	39.0455	75.4883	43.8899	83.8149	33.056	75.9346	36.7435	54.103	43.4721	91.3012	38.2904	87.0316	39.911	71.9673	85.1497	93.8503
ENSMUSG00000024300	Myo1f	52.2746	29.9739	22.298	24.3718	54.8347	25.6407	24.6449	21.2083	42.8145	25.9253	25.5603	28.3454	46.6997	36.1851	22.6526	33.1152
ENSMUSG00000031749	St3gal2	4.76475	1.38574	2.1894	2.15293	6.88703	1.53585	4.22156	1.36373	5.33388	1.98528	3.14388	1.77779	4.79968	3.83863	3.87791	3.51116
ENSMUSG00000047123	Ticam1	4.86436	12.638	7.27493	7.79046	5.64979	12.3728	9.9995	6.87333	6.62832	12.2019	8.49509	8.5508	4.8335	11.3268	5.36373	8.33784
ENSMUSG00000027428	Rbbp9	12.476	5.32935	14.4369	10.3134	9.67181	5.75489	11.7072	9.32195	11.6062	7.32392	11.3406	5.92036	11.93	4.53846	13.0097	3.88896
ENSMUSG00000028459	Cd72	1.20474	3.16644	2.40807	1.31074	1.33828	3.8171	2.12197	0.877509	1.12186	2.72945	1.68383	0.593702	1.13992	3.08079	1.58093	1.52605
ENSMUSG00000022529	Zfp263	2.12514	6.75116	2.82666	3.7792	2.77302	5.54883	2.41869	3.38122	2.41207	4.93606	3.0056	3.72401	2.53092	6.73179	2.28935	5.70953
ENSMUSG00000086841	2410006H16Rik	32.8151	63.4376	37.7404	73.8441	26.5647	80.9813	42.9976	75.0851	24.4236	59.7796	28.3488	50.4267	33.1596	36.0641	52.8942	35.0859
ENSMUSG00000018001	Cyth3	6.6602	4.24962	8.57619	3.48555	6.82325	3.69232	9.26758	4.24699	6.29705	4.49485	9.42127	4.09184	7.03789	4.86737	7.348	3.31048
ENSMUSG00000028268	Gbp3	1.39577	4.84774	3.71056	4.47077	1.99325	2.18628	3.96656	5.25433	1.4503	3.65979	2.5235	4.43973	2.02963	2.94814	2.43429	3.76467
ENSMUSG00000056608	Chd9	4.47538	2.60411	1.78998	1.61398	3.99633	2.22696	1.66126	1.40581	4.07358	2.45787	1.67811	1.6102	3.94806	2.23183	1.59796	1.5279
ENSMUSG00000032377	Plscr4	6.91233	2.31137	3.52309	2.60698	5.50299	3.78227	4.02485	4.39621	6.0404	3.09108	3.29126	2.1642	7.91278	2.74124	2.86366	1.88582
ENSMUSG00000081809	Gm15539	2.35712	2.31166	1.00672	1.87191	3.68211	0	0.642019	0.598911	2.21509	1.46596	1.1766	0.757565	2.38187	0.801019	0.429604	0.812455
ENSMUSG00000025161	Slc16a3	3.66786	3.58654	0.810915	0.993792	3.62316	3.16325	1.30266	1.05987	3.40999	3.16292	1.65138	4.05656	4.00367	7.78113	2.98857	8.77533
ENSMUSG00000033863	Klf9	31.5942	18.806	40.3736	20.7809	32.0059	17.9834	43.2466	29.2269	37.6545	24.0117	39.0838	28.7344	31.9259	17.9239	40.1658	21.3154
ENSMUSG00000026187	Xrcc5	3.37034	1.58749	0.892064	1.32697	2.44706	0.154139	1.7541	1.4152	3.21186	0.788674	0.868827	0.839103	2.01465	0.931597	1.57028	1.43984
ENSMUSG00000010406	Mrpl52	6.88918	14.6745	5.81351	10.3114	6.36717	13.0135	5.39026	9.27994	6.55654	12.9511	4.93925	11.7382	6.16336	13.7785	8.84122	13.4345
ENSMUSG00000047592	Nxpe5	1.39914	3.31427	5.10233	3.80347	1.40104	2.8911	3.27345	4.18397	1.94926	2.93559	5.22013	2.62887	2.48161	2.89853	5.03141	2.26289
ENSMUSG00000028381	Ugcg	5.50211	13.1569	17.9732	17.5947	7.88819	18.2959	20.4921	16.803	7.97052	17.7237	15.6509	18.8432	12.043	22.1454	14.0971	16.9262
ENSMUSG00000046229	Scand1	21.4126	43.9581	31.0803	44.2506	19.6784	44.4502	26.0129	37.8137	22.0745	41.5412	25.1525	42.5581	17.762	33.6001	40.8463	42.2589
ENSMUSG00000036606	Plxnb2	28.1302	12.7393	12.4005	10.7983	28.1491	10.8008	22.2953	14.6544	24.7301	10.2613	22.9349	14.2881	32.3234	20.5457	17.0011	18.6856
ENSMUSG00000042363	Lgalsl	1.2806	0.200944	1.07201	0.366117	1.467	0.302419	1.93004	0.390459	1.85986	0.500619	2.02425	0.795717	2.02342	0.413427	1.8672	0.662098
ENSMUSG00000047810	Ccdc88b	2.71478	4.69641	0.873266	1.98697	3.57222	2.9384	0.854903	2.14186	1.90765	2.67709	1.14149	1.9887	2.32314	4.22841	2.35359	5.42472
ENSMUSG00000002496	Tsc2	13.0797	6.37024	8.84345	10.1232	16.161	4.2973	13.8679	7.86718	13.8825	6.20437	15.5847	8.35999	17.7381	11.3947	12.1214	10.6022
ENSMUSG00000026656	Fcgr2b	30.8581	56.2815	56.0736	71.8589	29.4373	55.5178	46.1892	71.1496	34.2174	60.2735	44.5281	61.6983	34.4043	51.1073	53.2433	58.4681
ENSMUSG00000033933	Vhl	10.0601	9.73216	6.21809	6.455	10.9635	13.8759	5.12725	6.16535	8.00374	9.83183	5.29571	9.19742	9.8658	14.5598	5.23555	14.1769
ENSMUSG00000046711	Hmga1	1.70096	4.24337	2.81121	3.22388	1.89925	5.49034	3.21551	3.891	2.1979	4.15593	3.55799	4.77856	1.93367	5.67715	3.34925	4.41941
ENSMUSG00000027420	Bfsp1	0.936664	1.93431	1.8105	2.50147	0.587596	1.79591	1.52345	2.09434	0.553284	1.07234	0.979635	2.52299	0.97354	1.8007	1.23402	3.04402
ENSMUSG00000056069	Fam105a	172.027	125.985	99.6657	86.4823	163.772	94.583	93.3923	81.6515	151.23	104.334	89.5393	76.1605	154.475	95.081	95.372	73.1209
ENSMUSG00000039031	Arhgap18	20.0106	34.7958	39.0427	47.3497	17.3463	33.2902	37.1724	39.4851	21.9721	35.501	37.9512	36.6288	19.0031	35.7729	32.251	37.8423
ENSMUSG00000008305	Tle1	1.31308	2.04956	0.546848	0.634458	1.45554	1.9887	0.691718	0.905175	1.36956	1.77687	0.396151	0.952244	1.29285	2.3913	0.448395	1.8054
ENSMUSG00000040446	Rprd1a	5.50396	2.77087	3.95165	1.652	5.17341	1.95522	4.39746	2.86628	4.69487	1.8482	3.79705	2.92707	5.76139	1.95194	3.93282	3.58505
ENSMUSG00000022856	Tmem41a	18.7416	16.4633	14.3395	6.39288	16.1873	5.60261	11.3195	9.56172	15.851	11.7748	12.2508	9.67572	15.6917	7.08923	11.8089	5.49857
ENSMUSG00000035828	Pim3	21.3088	53.7098	35.9456	42.4414	23.501	42.4921	35.8525	42.7875	25.9145	56.2529	42.3965	48.3908	25.535	44.5599	37.3931	46.8119
ENSMUSG00000006333	Rps9	24.1933	52.5935	32.9022	48.1921	23.5515	49.3057	29.1851	48.6381	25.0689	50.0887	25.8837	47.6049	23.0801	44.2816	37.0637	43.7672
ENSMUSG00000010047	Hyal2	7.58029	4.86661	9.93686	5.86818	8.66012	3.72213	10.2417	6.49948	8.69882	5.9146	9.72314	4.53184	7.97124	3.9394	11.0581	2.67544
ENSMUSG00000040415	Dtx3	2.92273	2.3693	0.888958	1.07736	2.62884	1.33488	1.82223	0.487927	2.04805	1.13926	1.37601	0.537545	2.64612	1.72093	1.64271	1.00886
ENSMUSG00000031851	Ntpcr	18.4203	10.7886	10.3813	10.4003	16.7299	10.742	9.70238	8.87345	15.4666	10.7419	8.1584	7.31809	16.2461	8.34906	8.45908	4.78483
ENSMUSG00000026574	Dpt	1.54772	3.3393	2.84242	2.64261	0.738748	3.80728	4.28583	10.2246	1.05779	2.2689	1.54514	4.31103	5.2606	2.30107	4.30177	4.06769
ENSMUSG00000059713	Rcan3	8.35273	2.16096	6.53439	3.94548	9.99427	3.33403	8.45515	4.20781	6.42872	3.19511	6.62359	4.16444	9.35702	6.35773	6.00501	4.83637
ENSMUSG00000004707	Ly9	2.97486	6.85445	2.53153	5.78588	3.10781	3.87604	1.70413	4.36123	2.97495	5.56241	2.14712	3.79675	2.9834	4.74191	2.12682	2.08558
ENSMUSG00000028551	Cdkn2c	12.8168	8.33981	10.418	7.40496	15.9253	10.6062	10.87	7.23393	14.6573	8.35066	9.5571	5.55407	13.2939	7.00282	13.1537	6.13861
ENSMUSG00000097576	D930030I03Rik	0.131831	2.4177	0.123871	1.95778	0.2517	2.28304	0.658302	0.614101	0.619438	1.67492	0.361933	1.55356	0.79929	1.232	0.792899	2.37422
ENSMUSG00000005968	Tuft1	1.8262	1.8812	5.22521	2.13508	2.70023	2.19956	4.26476	2.8271	2.50328	1.35535	4.33516	1.60192	2.331	1.23186	3.50983	0.6898
ENSMUSG00000019843	Fyn	7.73152	3.24189	4.1626	2.51426	9.5357	3.58863	3.60712	2.11622	8.68431	3.77805	4.4867	3.92379	8.52551	6.55291	2.99118	8.21112
ENSMUSG00000072949	Acot1	0.388982	1.25888	0.730989	0.747564	0.222801	1.7683	0.466174	0.507352	0.146218	1.74872	0.854337	1.2835	0.471679	1.67217	1.16977	0.66367
ENSMUSG00000049858	Suox	6.71222	3.17492	6.98613	4.28492	7.98497	4.13553	4.95029	5.19515	5.72552	3.22951	6.04813	10.1613	6.10441	5.40424	5.53803	16.1995
ENSMUSG00000020460	Rps27a	19.6978	37.1597	20.5333	30.7085	14.6897	35.1695	18.0582	30.8994	16.8022	36.4945	19.0432	35.0374	17.2506	31.8761	26.496	36.0654
ENSMUSG00000108238	NoGeneName	0.254088	2.28422	0.557073	1.07282	0.24256	2.10847	0.169172	0.315627	0.477556	0.538034	0.232526	0.149714	0.427925	1.30599	0.169801	1.52534
ENSMUSG00000028234	Rps20	9.27322	21.2888	11.6335	18.7399	8.8525	19.8007	10.8005	17.4671	9.42681	18.9159	9.22626	17.3299	8.24712	15.4195	13.1456	17.5557
ENSMUSG00000055148	Klf2	182.813	101.513	158.201	194.118	159.851	73.0648	158.312	168.605	153.841	81.8885	192.9	177.053	172.921	90.7613	187.139	128.158
ENSMUSG00000089942	Pira2	2.23413	4.67712	2.57727	3.94197	1.56262	4.142	2.76143	2.94697	1.97479	5.23162	2.99597	5.16134	2.05641	5.54008	2.15084	5.36756
ENSMUSG00000022178	Ajuba	2.18125	0.373508	1.36636	1.3308	2.67723	0	1.69433	1.06446	1.56177	1.01513	2.02784	1.02003	2.51903	1.10012	1.66592	0.590729
ENSMUSG00000105201	NoGeneName	1.12937	2.86047	2.21463	2.57369	1.07813	5.04904	2.50101	2.79055	1.61505	2.44744	1.12341	2.14102	0.645041	2.52386	1.27977	2.04791
ENSMUSG00000031503	Col4a2	0.790177	0.884597	0.280175	1.17216	0.569303	0.82299	1.23584	2.86132	1.00877	0.655683	1.30981	1.8975	2.80218	5.85182	2.06241	7.7725
ENSMUSG00000028128	F3	0.184885	0.199451	0.0992694	0.853693	0.428635	1.34363	0.342913	1.52562	0.421952	1.3939	0.193367	2.24102	0.373652	1.11073	1.00609	2.15304
ENSMUSG00000031608	Galnt7	10.1781	4.22025	12.3738	7.23223	10.5089	7.2869	11.0508	5.36102	10.9435	5.13476	14.0705	6.78117	10.0551	5.79209	11.1489	6.19816
ENSMUSG00000051343	Rab11fip5	15.4128	8.24179	11.9608	13.8807	17.8256	7.98116	17.4748	13.285	16.9225	8.9512	18.8742	10.2184	17.7932	6.97391	16.7839	5.63355
ENSMUSG00000028643	Svbp	14.5097	15.271	6.69801	6.53632	10.3765	12.0933	6.86675	5.22818	12.8752	11.3147	7.35633	5.89821	11.5457	10.8194	6.18278	5.22338
ENSMUSG00000030144	Clec4d	11.8023	28.7515	13.4286	20.0203	6.80107	24.6199	9.04384	9.63612	12.9867	27.599	12.8431	19.0671	16.1329	17.9281	17.4236	12.1227
ENSMUSG00000032076	Cadm1	0.685597	1.78055	0.281539	0.590042	0.848415	1.70951	0.207949	0.250763	1.03086	1.3649	0.367156	0.754076	0.733848	1.35261	0.274902	1.28528
ENSMUSG00000009035	Tmem184b	14.0433	5.82077	6.99882	4.72935	15.4526	6.78399	9.23516	6.14395	11.7459	5.7704	9.62623	6.42274	13.1259	8.72662	6.06432	8.05907
ENSMUSG00000025701	Alox5	64.5827	34.3492	68.5719	37.0016	75.5107	37.4461	71.1521	43.8686	63.894	33.7695	73.5499	32.0797	61.5739	34.0642	62.6047	23.8908
ENSMUSG00000053460	Ggcx	2.75871	0.761727	2.36069	1.2193	3.84059	0.426564	3.13233	1.45336	2.7005	1.44435	3.68172	2.01252	3.13613	1.642	2.46909	1.43197
ENSMUSG00000072620	Slfn2	361.303	796.756	560.697	694.662	432.93	854.708	650.769	749.947	424.467	836.071	533.085	723.14	384.172	700.023	598.099	642.242
ENSMUSG00000041959	S100a10	249.547	432.001	395.168	419.558	226.862	406.042	366.32	423.618	265.367	479.079	411.293	609.92	239.586	437.267	488.506	499.856
ENSMUSG00000020604	Arsg	1.83725	0.769982	1.19227	0.808251	2.30908	0.9013	0.765627	0.788105	2.18612	0.800899	1.1975	0.57632	2.44421	0.370567	1.15271	0.2631
ENSMUSG00000030134	Rasgef1a	1.02463	0.102033	0.992384	0.123934	0.782514	0.272992	1.77897	0.176233	0.96289	0.462177	1.08194	0.0743058	0.892025	0.0883891	0.916495	0.0448254
ENSMUSG00000027217	Tspan18	1.07268	0.385731	0.156786	0.177	1.47913	0.219308	0.345194	0.0555201	0.985647	0.163076	0.0545365	0.112364	1.19234	0.256183	0.107528	0.056487
ENSMUSG00000055172	C1ra	1.09852	2.37013	4.01407	4.97586	0.81564	2.46609	2.80369	6.1406	1.68231	3.4196	2.82974	2.97266	2.34344	3.49804	3.71137	1.61973
ENSMUSG00000003541	Ier3	490.929	1067.89	879.748	847.602	437.74	1029.66	791.988	1091.08	497.426	1027.71	703.935	926.816	544.521	784.691	734.304	588.534
ENSMUSG00000039747	Orai2	3.89907	7.26755	2.16249	3.55249	4.41542	4.40163	2.54395	3.64297	3.38066	5.0881	2.96498	4.27887	4.97863	8.70754	3.20295	9.31898
ENSMUSG00000054000	Tusc1	0.970984	2.38064	0.829412	3.39287	1.68533	3.53506	2.02761	2.63161	1.742	3.53701	2.42342	6.03332	1.69476	4.45458	2.21211	3.93248
ENSMUSG00000005982	Naa60	10.6314	5.06768	8.49943	5.44423	12.3058	5.13067	7.51832	6.64814	11.3207	5.14926	8.1766	5.32486	11.2082	5.63295	7.15314	5.26891
ENSMUSG00000015839	Nfe2l2	124.686	246.501	137.555	178.511	131.694	260.107	147.07	197.841	127.49	245.498	127.01	187.351	118.245	246.051	121.299	228.811
ENSMUSG00000032841	Prr5l	2.26992	0.6449	0.504721	0.983894	2.18347	1.85674	0.657596	0.339008	1.56322	1.35476	0.45986	1.51105	1.6634	1.32784	0.277912	2.84141
ENSMUSG00000017607	Tns4	0.723508	2.39864	0.911955	2.21982	0.808604	2.06281	0.828313	1.56183	0.713079	2.98359	1.03354	2.95296	0.945084	1.94597	1.18518	3.49587
ENSMUSG00000003228	Grk5	0.996335	2.191	1.47627	2.51067	1.06088	1.74204	1.53084	2.92751	1.65653	2.69649	1.78851	2.30309	1.39402	2.29195	1.76701	6.28388
ENSMUSG00000024232	Bambi	2.18986	2.82967	1.37929	2.90102	2.1824	3.82885	1.51409	2.73519	2.46497	4.75073	1.54156	2.94929	2.55329	3.62072	1.18201	2.41786
ENSMUSG00000058755	Osm	25.5713	64.4962	30.5394	42.7628	25.0576	47.2935	27.925	49.3911	27.549	59.4417	31.3112	37.6915	32.0381	50.735	31.2229	20.2741
ENSMUSG00000071379	Hpcal1	31.0787	41.8252	47.4534	54.5023	28.927	59.961	36.0046	46.7614	27.9648	47.6866	31.9966	58.9655	26.9297	48.7939	36.9173	70.848
ENSMUSG00000052146	Rps10	6.93513	15.6544	7.61319	12.8164	6.97008	16.4744	8.32052	12.8795	6.79687	14.1148	6.55609	14.3763	6.31408	11.0157	7.96141	11.3899
ENSMUSG00000005465	Il27ra	0.297169	0.961744	0.335071	1.05569	0.340424	0.343091	0.257213	0.812114	0.111705	1.64575	0.398863	1.70429	0.200192	1.4256	0.23831	2.19709
ENSMUSG00000097887	Gm26542	1.76343	0.634119	0.828474	0.941399	3.27332	0.742266	2.15251	0.547631	1.38098	0.574473	1.88275	0.2309	1.78194	0.457772	1.37487	0.464307
ENSMUSG00000063611	Gm10134	4.13832	3.77753	7.77688	11.9576	2.12723	2.06732	4.7688	4.74518	5.98302	5.28887	15.1486	9.75357	3.21674	9.22224	6.70114	4.22434
ENSMUSG00000041058	Wwp1	34.6036	27.7768	54.5137	45.4838	29.3461	27.2403	53.5574	48.2372	33.8229	27.5827	53.0248	31.3446	34.3797	21.609	48.2558	14.5641
ENSMUSG00000036402	Gng12	15.4255	10.0589	14.3551	8.45535	15.055	9.45223	12.5114	8.08088	15.6353	8.79485	14.6757	7.38738	15.8065	9.9205	12.222	5.5309
ENSMUSG00000023031	Cela1	4.06848	4.03315	2.58298	5.37916	3.88389	2.49934	1.09816	2.56107	4.65	3.86871	1.40879	2.85077	4.55564	3.0828	1.65337	1.25072
ENSMUSG00000038893	Fam117a	0.127991	0.911296	0.144316	1.051	0.0733107	1.16369	0.230086	0.715457	0.28867	1.17582	0.210834	1.44798	0.25867	1.48319	0.307922	2.13522
ENSMUSG00000018459	Slc13a3	0.716752	1.76736	0.493078	2.25854	0.23215	1.88407	0.754171	1.68132	0.613424	1.80126	0.632503	1.9608	0.646675	1.50711	1.11622	2.3172
ENSMUSG00000036667	Tcaf1	1.29301	0.418465	1.38272	0.188256	1.62817	0.253247	1.19295	0.246663	1.19196	0.204595	1.19456	0.145119	1.15104	0.155361	1.19121	0.128397
ENSMUSG00000000078	Klf6	285.251	451.905	494.679	586.156	249.877	469.16	453.948	566.956	308.658	489.873	457.999	541.985	251.8	385.537	408.959	463.584
ENSMUSG00000059326	Csf2ra	88.5529	101.332	65.2087	103.658	84.6605	88.3213	72.7158	92.4001	85.3746	118.405	87.7016	183.664	87.2288	168.821	95.4738	255.106
ENSMUSG00000037563	Rps16	29.2051	62.954	28.4524	48.817	27.9314	61.3587	32.0142	50.9603	30.3769	58.1889	30.3692	55.8399	28.316	48.9567	42.1614	50.1144
ENSMUSG00000019080	Mfsd3	3.8583	1.56839	3.67786	3.17509	6.19212	2.42093	5.24942	3.12571	5.78028	1.74876	5.5266	1.91097	4.01181	2.4038	3.3071	2.75613
ENSMUSG00000028859	Csf3r	2.15898	5.89398	2.47022	3.88749	1.75257	6.10434	3.03626	3.84493	1.98748	3.25829	2.47307	2.57885	2.53783	5.16075	3.25366	1.19723
ENSMUSG00000005142	Man2b1	121.737	60.1006	84.2465	60.764	153.73	71.1344	82.0538	82.5693	111.723	58.9645	81.8831	62.2066	118.27	65.4702	66.2126	56.0952
ENSMUSG00000039952	Dag1	6.55544	2.14044	4.35196	2.66575	6.97766	2.57184	5.97476	4.38246	5.95641	2.74068	7.16918	3.5961	6.71566	3.96206	5.87607	3.54988
ENSMUSG00000025743	Sdc3	17.7149	24.7304	28.1793	35.9788	21.6095	23.3797	36.9218	37.9553	17.9593	27.2283	44.131	39.5984	23.8775	47.3254	27.2064	49.3378
ENSMUSG00000028081	Rps3a1	154.182	291.544	185.114	265.038	145.527	291.036	172.579	239.405	153.874	301.246	159.843	250.306	143.005	288.175	214.783	316.294
ENSMUSG00000036078	Sigmar1	20.7731	9.04509	8.60176	8.05688	19.8633	9.14925	10.937	8.57662	18.0259	10.2512	11.6348	10.3646	20.0056	9.94641	11.3893	11.2237
ENSMUSG00000040855	Reps2	4.45749	1.49235	2.95591	2.7884	3.36996	1.9465	3.97072	2.68739	3.80853	1.06155	3.84011	1.30417	3.69144	1.37419	2.34199	0.650767
ENSMUSG00000004151	Etv1	5.50144	2.55521	6.54835	3.3115	4.86049	2.75544	5.39827	3.50338	5.28409	2.62648	5.49776	2.46324	4.91479	1.85407	5.54517	1.82777
ENSMUSG00000022270	Fam134b	3.11252	5.6522	2.75398	1.45013	3.88746	6.3167	3.13439	1.93318	4.60684	3.09261	2.34993	1.68114	3.38109	4.87215	3.84806	3.17154
ENSMUSG00000058546	Rpl23a	14.6923	26.9446	18.5679	27.5304	13.3945	28.863	14.82	24.9806	12.9786	25.7743	13.4455	25.365	12.6195	27.1861	20.8398	26.5994
ENSMUSG00000062006	Rpl34	10.6843	21.8799	11.2302	18.3109	10.0051	21.5362	12.1399	20.6039	10.0192	22.7199	10.8548	18.0593	9.10377	15.506	14.7718	14.5044
ENSMUSG00000049866	Arl4c	6.23121	8.99965	3.33023	3.86737	5.69199	8.17093	4.08912	5.12582	7.34673	7.51538	2.79853	3.8902	6.86551	5.52432	3.28346	4.02653
ENSMUSG00000048486	Fitm2	1.92612	0.461749	2.75782	1.62918	2.45165	0.794202	2.68697	1.59508	2.24103	1.16531	2.43417	1.72939	1.23577	0.628579	1.90013	1.10123
ENSMUSG00000039910	Cited2	18.4269	42.2172	21.5414	44.4689	22.8858	51.4294	29.1125	36.4591	17.722	35.054	29.3273	37.257	22.6059	34.6714	28.9118	26.696
ENSMUSG00000009647	Mcu	3.64295	1.62725	3.52995	1.2804	3.74936	1.50944	3.63823	1.86932	4.06534	1.47419	4.88352	2.6496	3.69557	1.67563	4.05117	1.74001
ENSMUSG00000054850	Smim10l2a	1.06435	4.15539	2.04778	4.38323	1.54828	2.41375	3.03705	4.91075	1.57176	3.51686	4.12802	3.82254	0.870657	3.31554	1.829	0.576493
ENSMUSG00000019917	Sept10	8.50282	2.83426	5.70031	2.71239	7.02262	2.58517	6.29729	5.11791	6.37443	4.15496	4.80866	3.20869	6.70955	3.12489	5.41091	4.75425
ENSMUSG00000020021	Fgd6	3.27943	2.10513	4.68578	5.68225	3.05302	1.42276	4.77743	6.18629	3.70583	2.18525	5.02257	4.43953	3.83421	2.22889	3.61337	2.99287
ENSMUSG00000040084	Bub1b	2.54588	5.22073	1.78873	3.62651	4.29147	5.88354	3.96276	3.93173	2.71578	3.72097	1.4063	3.37858	3.45331	9.60254	3.4257	5.50028
ENSMUSG00000017491	Rarb	7.19553	2.06998	3.60589	2.44447	7.44149	0.951895	4.75088	0.819341	5.89793	3.12546	4.53628	4.85218	5.65527	5.3422	4.88876	8.63923
ENSMUSG00000030474	Siglece	6.34574	15.9561	6.76953	13.2542	7.28762	16.6289	7.00462	14.98	6.63593	10.958	9.12567	10.6268	7.95517	15.2493	10.5221	10.5375
ENSMUSG00000027035	Cers6	2.44133	3.86201	1.57763	4.89753	2.03579	6.06817	2.40925	3.32628	2.09472	4.60212	2.4196	4.96931	2.08667	6.0419	2.20541	5.92693
ENSMUSG00000003545	Fosb	2.2097	3.58998	2.23063	5.49934	1.82111	3.30941	3.3182	6.35372	2.64425	3.92555	3.1618	5.1206	2.74695	3.80323	3.20836	5.16848
ENSMUSG00000105285	NoGeneName	14.5271	34.9878	11.7453	17.7076	6.12774	20.4774	10.7969	11.9604	13.0168	16.1786	12.676	5.97189	10.9244	14.5232	7.11179	12.4889
ENSMUSG00000018931	Natd1	7.49001	5.1655	4.44886	5.70178	9.39739	2.83744	5.04921	5.78181	7.64201	3.00646	7.2461	3.87738	8.64987	4.09979	4.7462	3.3723
ENSMUSG00000003038	Hmgn2	8.17698	15.8829	8.51082	13.7448	7.77485	15.9945	7.76458	13.5849	8.18498	16.5249	7.0154	13.6982	8.17492	18.2099	41.0491	14.7903
ENSMUSG00000062995	Ica1	1.36578	0.103759	1.0393	0.184846	1.16608	0.0208208	0.720425	0.0448036	0.930975	0.131599	0.774572	0.0906755	0.952472	0.0719075	1.40764	0.0273503
ENSMUSG00000045165	AI467606	18.3858	14.8165	28.5728	25.9509	17.5097	11.4462	24.0151	27.0631	21.2366	14.6665	26.9852	22.0286	16.9382	11.6461	26.3917	16.7619
ENSMUSG00000040511	Pvr	3.01138	8.38675	4.72071	4.71099	2.93342	7.26719	5.616	5.3248	2.8588	6.02125	4.02127	4.87046	4.37817	7.69604	3.63471	8.79621
ENSMUSG00000006281	Tep1	7.27589	11.5494	9.75256	12.4525	7.65454	12.2628	11.656	15.5492	7.64681	9.5343	10.5041	14.3662	8.11751	13.6268	10.449	21.0136
ENSMUSG00000030560	Ctsc	198.477	386.182	451.472	485.534	200.718	388.688	389.337	480.742	243.746	420.101	412.604	401.636	218.604	359.928	366.438	307.665
ENSMUSG00000025511	Tspan4	33.0243	19.3436	29.9039	21.6046	34.0714	20.2023	31.7599	21.4229	32.9424	17.2372	27.2892	15.2498	30.726	11.7962	29.7446	7.23442
ENSMUSG00000032508	Myd88	17.1927	37.04	29.5297	29.2429	17.3058	37.7925	31.4623	39.1724	18.9605	34.5196	30.5421	32.4171	19.9281	36.6709	30.5655	43.5453
ENSMUSG00000045625	Pigz	13.8813	7.52569	15.2392	9.86806	12.9135	4.33112	10.9634	13.7903	11.0482	7.06007	9.65717	5.92574	12.4526	5.09635	8.8388	1.71185
ENSMUSG00000045980	Tmem104	15.2265	6.33447	7.31133	8.1887	13.629	6.18938	8.2502	9.09069	13.4705	6.57318	10.0535	8.18601	15.9002	9.01123	10.7238	6.63891
ENSMUSG00000079625	Tm4sf19	8.78035	16.342	19.9455	11.8003	10.6847	14.2032	17.7307	13.4838	11.7876	13.7676	29.757	16.0324	12.09	19.3866	20.3113	7.59099
ENSMUSG00000029059	Fam213b	67.1117	41.099	55.3842	42.3002	60.4487	31.8285	43.0081	43.8341	55.0232	27.9089	40.5458	32.1124	53.0247	18.8093	50.5701	9.66278
ENSMUSG00000027459	Fam110a	3.9106	4.15814	2.46137	2.10854	3.59028	5.3871	1.94342	2.09185	4.20247	4.79106	1.6952	2.29319	4.15963	6.2425	2.58836	4.30976
ENSMUSG00000020186	Csrp2	3.11626	8.87507	7.14454	9.03789	4.28382	10.9283	6.84688	7.54845	4.4513	8.04026	6.73028	4.4068	5.03835	8.62022	8.4967	3.78088
ENSMUSG00000108291	NoGeneName	0.410439	2.6013	0.771311	1.61346	0.146931	1.33274	0.409907	1.57734	0.241067	1.30366	0.516463	1.57196	0.518434	1.05481	0.925719	1.21576
ENSMUSG00000024544	Ldlrad4	12.4544	9.39445	11.1081	7.69233	14.8153	9.84694	9.81458	7.47858	13.7156	7.60741	8.85982	5.33182	12.1427	6.59242	7.75406	5.02643
ENSMUSG00000022892	App	463.348	194.963	371.103	268.466	430.962	197.962	320.361	247.591	430.291	237.9	322.652	245.416	426.641	273.251	303.75	281.856
ENSMUSG00000002477	Snrpd1	25.648	57.9948	38.1232	46.9624	22.8244	45.4836	28.6538	48.5998	26.5537	50.6987	31.5606	46.7886	25.7708	44.2814	37.7661	40.6557
ENSMUSG00000037887	Dusp8	2.01534	0.80951	2.73974	1.19866	2.76305	1.90287	3.34027	1.41817	2.63937	1.21529	2.84496	1.08642	3.59636	1.08195	2.85838	0.467409
ENSMUSG00000021288	Klc1	13.4191	5.22935	7.16539	6.72194	13.7227	7.50752	10.0759	6.63648	10.407	4.80487	11.2435	6.29298	11.4294	5.902	8.227	5.45394
ENSMUSG00000021990	Spata13	1.42039	0.670974	0.339873	0.107896	1.7181	0.802117	0.400895	0.0410964	1.49233	0.534573	0.41983	0.280708	1.67155	1.46756	0.358167	0.907322
ENSMUSG00000036256	Igfbp7	1.51868	3.7286	3.83807	9.97286	3.64943	5.66818	6.85134	11.8069	4.23229	7.77937	5.1279	9.81237	10.2132	12.2349	10.4989	9.9773
ENSMUSG00000028599	Tnfrsf1b	98.1443	116.018	58.7336	59.7597	116.555	132.778	78.6621	75.2129	92.1762	112.003	75.601	91.6603	111.568	169.462	59.8756	100.486
ENSMUSG00000017652	Cd40	24.7806	13.022	15.3779	13.8505	27.6804	15.07	15.5157	15.4408	19.1612	11.9688	12.4494	9.03174	19.1355	8.7888	11.4599	6.79543
ENSMUSG00000002233	Rhoc	15.6799	8.58773	9.24282	6.71994	18.3972	12.1846	11.2963	8.34037	12.2667	9.79698	10.7191	10.2023	12.6214	6.33726	9.18886	3.379
ENSMUSG00000034968	Lbx2	1.97942	0.582374	2.28261	0.864579	1.37427	1.16862	2.33629	0.922062	0.930076	0.527595	1.81145	0.424117	1.36377	0.5045	1.71363	0.0852836
ENSMUSG00000023830	Igf2r	1.85567	0.513299	0.245895	2.37962	0.647271	0.84976	0.415797	1.40744	1.55382	1.05792	0.707584	2.27091	2.2598	1.48962	0.810837	1.86041
ENSMUSG00000031996	Aplp2	61.1111	30.6184	70.554	44.2756	66.0232	29.198	68.4093	45.229	64.2637	36.6988	75.182	47.061	62.4835	41.7577	56.1836	42.0809
ENSMUSG00000030403	Vasp	11.9549	17.9931	5.55614	9.54506	12.0875	13.4614	7.4461	8.7725	9.42255	14.8245	7.35245	10.3768	11.9505	19.2211	11.6939	16.8758
ENSMUSG00000019916	P4ha1	18.3977	10.3155	13.8368	8.43249	18.108	9.25441	12.0246	8.6547	16.7527	10.461	12.0515	8.77624	18.7219	11.155	11.0939	9.58019
ENSMUSG00000017747	Ghdc	5.01386	3.42334	6.23179	2.57807	5.57402	3.36603	6.24336	3.6364	5.21871	3.13235	6.70835	2.91688	4.80996	1.39382	5.28046	1.65435
ENSMUSG00000036781	Rps27l	27.4361	47.1818	29.6189	42.129	24.9053	40.7288	26.2346	40.3701	28.1038	51.2136	27.8201	53.7102	24.5479	50.6923	38.5754	69.5903
ENSMUSG00000053644	Aldh7a1	3.99242	2.83577	7.92984	5.64584	5.41505	3.6902	7.43168	6.99714	5.13559	3.52518	6.82795	4.35548	4.97301	3.04763	6.70644	1.92962
ENSMUSG00000049932	H2afx	9.63968	16.355	9.634	15.5404	13.9708	20.2983	10.5899	18.2065	10.5412	17.6429	10.987	24.5785	8.14691	23.4223	28.1105	26.747
ENSMUSG00000022353	Mtss1	25.0142	16.7602	46.1813	23.6441	24.3923	20.6761	33.7888	28.2429	25.5041	19.8391	33.1078	19.0858	22.3887	14.7701	29.1885	12.1098
ENSMUSG00000034957	Cebpa	7.8289	4.5645	1.78548	3.54126	9.21515	3.94895	4.60522	2.43126	9.6667	4.60563	6.0748	6.38948	10.3689	5.75364	4.90172	5.11531
ENSMUSG00000028793	Rnf19b	4.50156	11.8296	4.37958	5.80755	6.55723	11.6565	5.75748	6.23938	5.75185	10.4412	6.44314	6.98158	7.07732	11.2565	5.00426	6.48756
ENSMUSG00000049775	Tmsb4x	3330.85	3811.88	2040.74	2928.27	2676.45	3727.42	1771.48	2536.7	2658.1	3899.38	1729.2	4011.1	2373.1	3789.39	2378.65	4681.83
ENSMUSG00000044533	Rps2	12.6521	27.0703	15.5372	23.1641	12.9001	27.1413	14.7768	21.4627	13.6732	26.2071	13.4922	22.344	12.4653	22.6294	16.875	22.5194
ENSMUSG00000033083	Tbc1d4	2.21737	0.657331	2.55438	1.33859	2.24412	1.03415	2.63579	1.35369	2.18541	0.821017	2.7749	0.773292	2.81629	1.07148	2.60945	1.64383
ENSMUSG00000026072	Il1r1	0.130836	0.0352859	0.0922016	0.495273	0.145716	0.295027	0.0871108	0.883722	0.225412	0.277046	0.2694	1.14352	0.374592	1.09024	0.338809	2.67667
ENSMUSG00000071076	Jund	84.6375	153.666	114.166	183.063	101.413	171.334	163.609	184.26	114.387	174.388	199.361	238.126	105.144	167.366	205.618	177.544
ENSMUSG00000021987	Mtmr6	70.0643	45.8076	60.7833	39.027	74.8237	47.6368	55.8273	36.2019	67.655	41.9006	61.6594	35.9554	76.0076	49.6398	52.0414	37.2519
ENSMUSG00000038274	Fau	31.7881	62.5333	35.3819	56.7771	30.7767	68.5338	32.7772	61.5733	30.721	59.8651	30.0347	59.876	29.5155	48.3867	42.5296	50.6054
ENSMUSG00000006219	Fblim1	2.88684	1.58134	1.3141	1.09106	2.74872	1.09281	1.77019	1.01728	2.89563	1.49838	2.02589	1.21625	2.58462	1.01344	1.32696	0.552942
ENSMUSG00000040560	Wdr7	8.37681	3.33128	4.84123	4.24755	7.96419	3.93327	7.25845	4.24385	8.33701	3.0346	6.93216	3.5385	9.46466	5.93108	6.37903	3.86496
ENSMUSG00000043881	Kbtbd7	4.17761	1.12669	4.20215	1.21647	3.19557	1.56521	3.77103	2.44501	3.49807	1.20391	3.35747	1.48324	3.24728	1.92703	3.48976	2.0053
ENSMUSG00000058056	Palld	2.46523	0.792999	1.7099	1.05719	2.94386	1.13524	1.8219	0.943744	2.62838	0.670222	2.19861	1.02472	2.54546	1.01369	1.53663	1.44877
ENSMUSG00000036104	Rab3gap1	2.90237	1.00255	3.24433	1.69236	4.15603	1.49334	3.34839	1.63837	3.86282	1.22962	4.14113	1.96287	3.5613	1.92403	3.18169	2.07347
ENSMUSG00000040522	Tlr8	12.766	7.88133	8.38372	7.79438	13.3516	7.52784	9.16986	5.65541	12.4841	6.79716	9.88214	6.90192	13.5781	7.027	8.33248	5.01659
ENSMUSG00000027843	Ptpn22	2.22004	6.32482	3.38499	5.00705	2.94777	4.95872	3.4366	4.2776	3.03457	4.86203	4.10947	6.81399	2.41669	5.93174	3.28753	7.86247
ENSMUSG00000022125	Cln5	75.6764	41.7203	51.2255	38.3384	78.3316	45.8586	51.3629	38.6238	77.5859	50.8069	54.5235	41.9357	69.77	41.487	53.0761	36.8014
ENSMUSG00000056708	Ier5	67.5655	124.53	129.546	155.335	77.7535	141.253	130.223	166.595	80.89	135.358	111.602	129.446	67.3395	117.669	94.6719	113.453
ENSMUSG00000068101	Cenpm	1.52262	2.43555	0.740008	2.24743	1.70415	3.06877	1.62552	2.93492	1.5789	2.41171	0.480488	1.8562	1.06111	3.58187	1.26315	4.23022
ENSMUSG00000006235	Epor	7.56776	8.10992	15.5873	11.1204	7.27226	9.49303	14.9658	10.3189	8.14791	4.16335	11.3745	6.08327	6.43175	4.02794	11.0023	1.9002
ENSMUSG00000035790	Cep19	2.47573	0.738727	3.81108	2.76092	2.69027	1.99549	3.65618	3.41069	2.17805	1.5444	3.25386	2.35884	3.034	1.57525	4.0922	3.3952
ENSMUSG00000018585	Atox1	188.494	235.452	121.707	176.258	168.204	226.102	110.801	170.794	159.016	236.929	103.32	242.548	157.151	244.709	156.454	277.87
ENSMUSG00000025810	Nrp1	76.8051	38.755	71.2911	54.2796	77.4848	42.2389	65.3955	60.8027	77.0823	40.2292	66.1231	40.6032	71.9276	35.8708	56.0714	24.9786
ENSMUSG00000074813	Gm14005	3.04357	1.51811	0.953264	0.800487	2.53058	1.87738	0.78442	0.457344	1.84528	1.88706	0.598989	1.34983	3.10859	1.7127	1.27942	1.2098
ENSMUSG00000027340	Slc23a2	15.8975	8.55026	20.7682	12.6751	15.3624	10.5899	24.5027	15.0246	17.0307	12.017	21.7178	14.5441	14.5461	11.0086	17.0742	9.27396
ENSMUSG00000064373	Sepp1	750.738	746.788	1704.34	1296.63	817.092	897.299	1583.3	1410.44	848.085	847.023	1306.5	854.66	702.311	497.731	1109.45	320.638
ENSMUSG00000024177	Nme4	4.00834	4.32414	9.71951	8.64093	3.5179	4.26854	5.61732	6.80618	3.70606	5.81292	7.92805	6.93304	3.7891	3.86675	9.00816	2.26738
ENSMUSG00000027215	Cd82	3.20822	8.25117	3.10188	4.30543	3.12924	8.37926	4.59713	5.2198	3.32077	6.23678	4.26567	4.28754	3.78221	6.38743	4.32292	5.78448
ENSMUSG00000025794	Rpl14	31.4215	56.1282	41.6571	56.6545	27.7977	57.419	35.4562	57.8686	34.1026	60.7905	34.1434	54.8558	27.186	54.3159	44.412	63.9048
ENSMUSG00000056124	B4galt6	4.44794	10.5654	9.77147	12.4776	5.54191	7.4136	8.32126	13.3072	5.73023	9.00018	9.63159	11.0493	5.82403	9.85517	9.12671	7.83834
ENSMUSG00000028989	Angptl7	0.33737	1.33448	4.27949	0.687669	4.29419	2.61698	3.93089	0.261925	1.53237	2.14316	1.18351	0.397572	5.96596	4.88689	4.00187	3.78411
ENSMUSG00000024672	Ms4a7	52.5669	52.9653	42.3676	38.4908	45.9171	47.5083	33.8237	29.7934	53.266	53.6999	39.002	27.2105	49.5351	29.656	43.4756	8.2802
ENSMUSG00000027006	Dnajc10	22.7677	12.188	17.5474	12.258	23.6883	10.4417	18.5993	8.47499	22.8987	11.7474	19.1991	11.8143	21.9468	14.5919	18.634	13.4962
ENSMUSG00000030208	Emp1	132.82	71.2649	104.143	97.5066	114.448	68.9228	138.079	79.0687	132.689	75.2094	159.728	91.0647	128.624	66.5352	138.5	61.4675
ENSMUSG00000038607	Gng10	2.18579	3.56575	1.70316	2.84086	2.44287	3.92383	1.33107	3.07941	2.45488	3.90768	1.75637	3.20408	1.99325	5.13163	2.08419	7.57993
ENSMUSG00000030872	Gga2	4.6203	2.66882	3.36567	2.40464	4.70339	3.31884	3.71651	2.75929	4.87236	2.69022	3.85834	1.64246	4.4505	2.67665	3.41597	1.08991
ENSMUSG00000040829	Zmynd15	1.44838	2.05818	0.844713	0.636993	1.15382	1.79473	0.778121	0.158204	0.722797	1.16171	0.722156	0.282512	1.09012	1.37223	0.470611	0.378726
ENSMUSG00000103847	Gm20056	11.4508	20.168	18.6642	18.577	11.3774	20.488	21.0048	18.0704	15.153	23.0671	37.853	20.6542	14.6408	18.9999	26.2364	10.4108
ENSMUSG00000072941	Sod3	0.908499	1.3651	0.884129	1.98409	1.79651	1.54524	1.23137	3.53675	1.73801	2.91734	1.90036	6.72959	4.0328	4.63929	3.90298	6.4278
ENSMUSG00000106825	NoGeneName	3.94021	2.25815	1.73545	1.93615	3.52636	2.13239	2.2135	1.72073	2.66138	0.240676	2.25366	1.88635	3.6083	0.690422	0.987434	0.583565
ENSMUSG00000026648	Dclre1c	2.61806	4.02872	7.70511	7.27564	2.60585	5.09947	5.98195	5.98595	2.89046	4.3208	6.00761	4.07198	3.10244	3.31785	5.24317	2.74085
ENSMUSG00000021109	Hif1a	26.3916	9.961	13.0187	10.7138	23.7428	12.2066	13.6866	9.55927	25.3407	13.0096	15.7113	14.0376	24.1758	15.5078	13.9494	16.1969
ENSMUSG00000024535	Snx24	23.2948	16.5257	25.1793	12.9028	21.7947	10.597	17.8277	14.547	18.7978	12.6204	18.6146	10.7419	20.8527	9.07069	22.7165	4.48009
ENSMUSG00000073491	Pydc4	0.0482006	1.10496	0.396288	1.779	0.0345103	0.86082	0.13238	0.965478	0.124565	1.28367	0.176441	0.553817	0.10959	0.957204	0.314061	0.319816
ENSMUSG00000085178	Kdm6bos	1.44387	3.73829	1.49235	2.0181	1.37836	4.37583	2.01879	0.807104	2.17098	1.69333	0.528536	2.04182	0.875413	2.29387	0.434206	1.77918
ENSMUSG00000047786	Lix1	0.565186	0.022582	1.47516	0.219434	0.799323	0.362513	0.857133	0.175518	0.511459	0.327326	1.43674	0.222013	0.803797	0.0978117	1.15409	0.0793665
ENSMUSG00000056917	Sipa1	11.606	5.21534	7.93798	7.09558	13.1927	4.88031	10.6074	6.91525	11.2049	5.00317	10.3232	6.65626	11.514	8.0167	8.26455	6.33365
ENSMUSG00000049119	Fam110b	1.59315	0.255248	1.93418	0.585627	1.74674	0.682924	1.44143	0.426173	1.5861	0.501017	1.227	0.306711	1.38673	0.243228	1.02777	0.112136
ENSMUSG00000055912	Tmem150a	2.68133	2.1905	1.78561	1.02334	2.31117	1.18342	2.41787	1.1884	3.18029	1.5265	2.38233	1.34982	3.02514	0.729841	1.87886	0.444156
ENSMUSG00000037921	Ddx60	4.10235	2.52689	8.13488	7.41041	3.38501	3.915	7.28936	6.72759	4.23217	3.36425	6.49589	3.84312	4.18465	3.05372	6.07759	1.58852
ENSMUSG00000021423	Ly86	367.625	439.895	244.382	349.944	355.824	445.045	222.33	369.584	339.415	463.432	188.142	313.809	299.695	284.895	203.89	255.523
ENSMUSG00000037347	Chst7	8.52182	5.45661	16.7894	13.3038	10.0246	7.49803	15.5939	14.2908	16.0167	9.72551	15.7483	6.21986	10.2224	6.83354	11.4634	3.96062
ENSMUSG00000074743	Thbd	4.07214	6.22043	9.18302	13.0054	5.19355	6.87581	13.6972	12.0795	6.36775	6.71782	12.8493	8.40749	7.90058	10.1684	12.5072	6.48458
ENSMUSG00000109916	NoGeneName	5.48918	9.02345	9.08742	8.56279	5.24013	15.5606	9.13677	14.0026	5.77252	10.7293	5.98021	11.3972	6.60333	12.0917	7.20558	10.4061
ENSMUSG00000102721	A630081D01Rik	0.661673	2.71245	0.559548	0.520214	0.505322	3.36603	0.396489	0.493157	0.310902	1.09932	0.847734	1.16962	1.00293	1.11304	1.26022	0.752618
ENSMUSG00000034255	Arhgap27	1.93285	0.906257	0.494144	0.42361	1.94948	0.524864	0.750311	0.133623	1.62384	0.620766	0.593778	0.482917	1.7944	1.20633	0.554556	0.919284
ENSMUSG00000024736	Tmem132a	0.529978	1.52462	0.075451	0.813707	0.735903	2.17285	0.577409	1.19698	0.694243	1.22425	0.426216	0.946288	1.0224	1.38078	0.354173	1.41572
ENSMUSG00000021775	Nr1d2	27.6681	15.6769	27.83	15.9518	23.1637	10.2032	23.9467	13.3071	25.1385	15.0619	23.5179	12.8664	28.3836	13.5627	19.2631	11.0196
ENSMUSG00000102712	Gm37758	2.6995	4.16025	6.34124	2.35819	1.28851	4.8002	2.50343	3.41319	3.44285	8.10321	3.35272	3.8629	2.72784	5.76632	3.67246	4.93479
ENSMUSG00000037533	Rapgef6	4.33907	3.13065	6.73503	3.85445	4.06562	3.12596	6.85897	3.63953	5.20191	3.01684	6.82771	2.643	4.31765	2.76418	5.96491	2.31102
ENSMUSG00000055633	Zfp580	4.74563	2.48662	3.43986	1.71747	4.01257	3.00854	3.18222	2.46327	4.71452	1.72267	4.52905	1.91741	3.97337	1.77397	3.66976	1.22095
ENSMUSG00000030894	Tpp1	53.0677	32.0609	45.4156	32.6182	53.1196	25.4119	40.8911	32.647	54.8627	30.4897	44.7809	28.5031	50.8698	25.2633	39.4214	16.2149
ENSMUSG00000019810	Fuca2	22.3553	14.6481	12.5367	8.97604	22.0505	11.811	12.7478	10.0454	18.9573	12.786	11.0226	11.2051	19.7051	13.0201	11.2933	11.7411
ENSMUSG00000033355	Rtp4	7.66971	16.8266	11.2393	19.4057	4.5334	11.8715	6.92554	15.6978	6.42332	13.6515	6.41881	7.44608	6.00341	7.87319	6.99112	5.02866
ENSMUSG00000097423	Gm26522	1.01396	3.61808	1.83217	1.22643	0.670121	3.88338	0.934746	0.799318	0.513078	1.21963	0.713779	1.47063	0.945784	0.801792	0.703666	3.40082
ENSMUSG00000022414	Tab1	8.60703	3.92832	7.27081	5.63911	7.58449	1.97069	8.09996	2.3902	6.92181	2.70956	7.61157	3.90112	6.27215	5.02721	6.09756	4.07918
ENSMUSG00000035969	Rusc2	1.68892	0.326505	1.04977	0.711579	1.45891	0.388256	1.88824	0.734522	1.5099	0.343267	1.9149	0.827824	1.9634	0.555215	1.31844	0.556058
ENSMUSG00000003477	Inmt	0.243055	0.655511	1.1419	1.43319	0.754091	1.57846	2.30603	4.24579	0.571025	0.237541	1.22337	1.14571	0.552615	0.851785	1.1573	0.748753
ENSMUSG00000031320	Rps4x	45.75	91.9324	55.9231	76.8219	37.9777	83.6829	50.1866	70.9081	51.0115	89.6799	42.3947	74.7022	41.2581	71.0297	59.6083	90.3027
ENSMUSG00000022018	Rgcc	64.738	103.332	47.6701	73.8651	49.5668	110.111	51.1955	50.8352	78.2192	158.948	67.4661	149.934	67.4202	122.357	98.7985	123.979
ENSMUSG00000021211	Akr1c12	0.862895	2.48234	2.52246	2.26139	0.274582	1.14152	1.43629	4.10889	0.901001	1.87404	2.45675	2.14673	1.25949	2.0608	1.92218	1.27231
ENSMUSG00000003200	Sh3gl1	67.2568	52.4118	92.676	69.0824	65.3788	32.9455	83.3044	64.841	68.2099	48.912	86.2979	64.9105	68.3769	51.1471	91.5941	49.9354
ENSMUSG00000045404	Kcnk13	16.7479	7.6021	10.749	8.99408	14.8741	7.76358	10.2596	7.52444	15.2442	7.99388	11.8091	8.96497	13.71	6.82075	9.862	6.87475
ENSMUSG00000025366	Esyt1	63.1259	66.6443	40.7071	63.2195	71.3471	65.05	52.4327	61.8451	63.9283	67.159	51.4474	87.2605	69.5724	117.802	46.3295	151.662
ENSMUSG00000025417	Pip4k2c	5.64366	3.52888	2.02658	3.42281	6.4514	2.17884	4.05673	2.47824	5.77653	2.03762	5.5924	4.74447	7.77338	3.96403	5.26092	3.98654
ENSMUSG00000090939	Gm17147	2.52676	2.42296	1.0552	2.45255	3.21617	1.21551	2.2431	1.04625	3.16602	1.64629	3.59698	2.31595	5.10658	0.262371	2.25144	0.266117
ENSMUSG00000004187	Kifc2	1.85226	0.124887	0.797692	0.202259	1.39985	0.16707	0.886393	0.467365	0.979118	0.263993	1.55383	0.864021	1.52076	0.613061	0.696278	0.438927
ENSMUSG00000023809	Rps6ka2	1.72815	1.30743	1.41292	1.72532	2.18537	2.72073	1.79315	2.78095	2.50985	2.71985	1.78689	4.44334	2.19987	5.15964	2.27227	8.29669
ENSMUSG00000059291	Rpl11	8.14903	15.782	8.58674	13.1866	7.24216	17.7455	7.92532	13.7199	7.8221	15.3215	7.24444	14.6563	7.33269	12.2936	10.8138	14.0691
ENSMUSG00000068264	Ap5s1	8.06865	4.00831	6.2979	4.63005	7.82428	3.80479	5.23873	4.70033	6.40145	3.00827	4.28369	3.4986	7.32513	3.01275	4.78351	2.0717
ENSMUSG00000050299	Gm9843	1.44387	3.63444	2.26114	2.52262	1.37836	2.60466	0.720997	2.91454	0.226144	3.99814	1.76179	4.53737	1.45902	1.79911	1.92981	1.5967
ENSMUSG00000042485	Mustn1	2.78223	3.44608	6.87447	2.88055	3.63971	1.78454	9.46791	5.37612	4.84183	6.34459	7.4498	5.95024	5.20636	4.81496	10.6393	2.44185
ENSMUSG00000053004	Hrh1	2.64587	2.14074	5.54934	4.36678	2.81449	2.80244	5.61518	4.67473	2.45092	2.04097	4.66109	2.36078	2.67364	1.67787	4.03523	1.3525
ENSMUSG00000031563	Wwc2	4.25814	1.58622	2.94686	2.15316	4.48686	1.59149	3.76879	1.59158	4.03351	1.90218	3.75679	1.58252	3.89059	2.85148	3.46757	1.64347
ENSMUSG00000023169	Slc38a1	3.24678	3.5737	1.76024	2.80749	3.09948	4.73915	2.00261	2.82525	2.97887	4.02143	1.91549	3.30176	2.78679	5.07243	1.68514	5.44687
ENSMUSG00000004631	Sgce	1.05631	0.026378	1.09821	0.136704	1.04106	0.10057	1.20146	0.200466	0.905342	0.143381	0.993523	0.126785	0.933972	0.210227	1.1471	0.0602601
ENSMUSG00000062127	Cttnbp2nl	17.9353	9.46263	14.1851	8.26573	17.0158	9.37415	15.3665	9.2362	16.9427	8.45593	16.4211	8.81994	18.9849	14.0844	12.9713	9.42937
ENSMUSG00000047215	Rpl9	6.02936	13.3157	7.74343	10.943	5.99235	12.6646	6.69977	10.7899	5.65743	11.3726	5.90404	11.5177	5.80518	10.3773	8.20577	11.0387
ENSMUSG00000074622	Mafb	241.56	184.141	381.87	207.017	216.932	196.971	314.29	216.178	233.545	200.798	328.687	189.167	233.162	203.635	325.364	103.305
ENSMUSG00000025508	Rplp2	19.9472	30.9074	18.8409	29.1637	15.8851	37.491	16.8271	30.7135	16.6189	33.4097	15.8971	32.532	14.7041	28.0433	21.9147	29.2355
ENSMUSG00000097242	Gm16907	3.61184	1.35527	2.85272	1.28037	2.99824	2.32295	2.71844	0.975352	2.8531	0.716211	3.88019	1.60385	3.64976	2.05458	2.04641	1.24042
ENSMUSG00000001270	Ckb	179.629	257.962	121.903	155.484	230.546	275.34	173.086	178.589	169.423	226.881	142.758	225.995	150.502	289.802	118.781	372.111
ENSMUSG00000079559	Gm684	3.35305	1.03349	2.83553	1.00427	1.60046	0.985081	2.48761	2.09745	1.93562	0.421326	1.88495	1.01607	1.93614	0.492412	1.82463	0.454038
ENSMUSG00000001542	Ell2	18.5569	17.364	7.4995	9.26738	15.3339	14.3621	9.69817	5.91773	18.845	16.2833	10.1345	12.4625	20.4655	17.1244	9.73423	17.2113
ENSMUSG00000040613	Apobec1	27.9715	34.2012	17.2402	27.5098	27.5961	33.4368	16.7786	24.2339	25.4063	32.0943	15.7517	25.3583	23.7245	22.6525	13.4753	14.7415
ENSMUSG00000022602	Arc	0.178681	0.385516	0.858114	0.676389	0.28429	0.859552	0.991386	2.64499	0.485086	1.02836	1.28998	1.35698	0.260804	0.538056	0.915466	1.11029
ENSMUSG00000064326	Siva1	10.3655	23.6066	9.73956	16.7942	10.9946	17.9317	11.9446	13.2061	11.8223	20.6935	9.97231	20.3585	10.0266	22.437	15.0973	17.9707
ENSMUSG00000030064	Frmd4b	10.4399	8.43091	14.753	9.93562	10.2434	7.6139	15.6807	9.53988	11.4847	6.79818	16.5121	6.8611	11.2076	7.50153	13.2023	3.85637
ENSMUSG00000039286	Fndc3b	7.3818	3.70221	3.58545	2.67312	6.20313	3.17351	4.99802	2.69183	6.61622	3.07994	5.60625	4.19508	7.2745	3.67997	4.46667	3.22983
ENSMUSG00000024777	Ppp2r5b	12.6746	7.8184	8.55184	6.86115	12.8396	5.72823	14.88	6.18675	12.7345	5.76522	13.2648	6.83254	12.6373	6.74143	11.5901	5.39984
ENSMUSG00000000290	Itgb2	190.53	94.7041	99.073	102.522	180.251	91.2678	92.5223	78.6967	176.756	102.731	99.923	119.535	190.023	115.991	100.288	140.015
ENSMUSG00000053950	Adnp2	4.76717	4.17685	6.75309	3.97419	6.60687	7.04569	7.49192	2.59265	6.70852	3.68937	8.19379	3.90683	5.52635	4.25154	5.99156	2.84424
ENSMUSG00000110697	NoGeneName	1.13581	2.18422	2.22726	1.16476	0.659995	3.31395	1.13434	2.62243	0.464074	1.44788	0.632694	1.1639	0.748521	2.16905	0.990047	1.26384
ENSMUSG00000031838	Ifi30	113.983	207.208	158.964	178.926	115.428	211.38	139.544	187.018	118.861	209.247	127.302	194.702	117.931	247.969	138.574	235.673
ENSMUSG00000097715	Gpr137b-ps	26.9521	28.4644	20.9899	16.1913	29.1676	19.4044	24.6943	12.0271	28.5607	20.4081	21.6282	14.8793	27.3578	19.5525	18.1738	14.9217
ENSMUSG00000029082	Bst1	7.70244	5.45683	6.40919	4.1175	7.57247	4.41731	5.41534	3.62368	6.42806	5.03718	6.38252	3.77075	7.93818	4.01092	6.31897	2.46996
ENSMUSG00000056418	BC043934	1.60421	0.653057	2.27524	1.29562	1.44475	0	1.26962	1.43816	1.792	0.59163	1.24649	0.784727	1.34578	0.396012	1.7598	0.172142
ENSMUSG00000023274	Cd4	2.12456	1.77376	3.03781	0.871487	3.29798	2.17959	4.05911	2.49569	2.82988	1.6972	3.58423	1.58929	2.81892	1.72649	3.01861	0.507831
ENSMUSG00000041685	Fcho2	21.4983	10.508	19.5428	12.8032	18.5973	9.69712	19.7463	12.6641	21.3898	11.1624	22.2933	11.0825	21.8617	11.3616	18.1073	12.1439
ENSMUSG00000038712	Fam63a	10.9658	5.54749	11.5516	9.88282	10.956	5.4185	12.176	7.85575	11.0347	6.76304	12.6906	9.29465	10.5028	5.80502	11.0333	4.80973
ENSMUSG00000037225	Fgf2	0.959647	0.318539	0.138723	0.193457	1.20973	0.0399498	0.110585	0.160471	1.029	0.0841683	0.112591	0.072493	1.18107	0.14947	0.123329	0.069971
ENSMUSG00000036875	Dna2	0.162908	0.391426	0.0208733	0.633929	0.183792	0.921706	0.133115	0.372532	0.208761	0.550003	0.0474357	1.09951	0.3442	1.70926	0.259798	2.22499
ENSMUSG00000029135	Fosl2	5.85926	14.4844	5.39847	11.1864	5.50449	12.6838	6.84418	10.5703	6.23583	10.5016	6.05363	9.41788	7.87692	12.4992	6.71397	16.6517
ENSMUSG00000025742	Prps2	11.9648	6.30151	12.1438	6.97625	11.9877	6.99441	10.8502	5.25801	12.941	8.77001	10.3297	5.65324	12.8033	9.33547	10.0702	6.8742
ENSMUSG00000022124	Fbxl3	14.3584	6.63841	10.0589	8.18283	12.9983	7.85515	9.98909	5.63289	12.9976	6.51993	10.8606	7.00996	15.9699	7.36642	9.19397	7.4901
ENSMUSG00000001403	Ube2c	3.37969	7.08475	1.8765	5.33442	4.72954	9.47774	4.3342	5.18816	4.00614	7.3567	1.86276	6.01942	3.91968	9.47526	9.4321	8.04518
ENSMUSG00000037493	Cib2	5.33212	11.7783	6.12353	10.351	5.73658	12.1839	7.35387	6.8601	7.63556	14.9717	6.35129	10.4727	5.046	8.85873	7.12668	9.38632
ENSMUSG00000040751	Lat2	13.813	15.0953	8.43934	12.2237	13.0146	13.713	6.74998	8.39169	12.1837	14.6047	6.67908	14.2488	11.517	14.3256	7.22589	15.0782
ENSMUSG00000028164	Manba	12.5509	7.46048	11.5938	6.255	14.5117	7.23813	11.9156	7.50663	12.6223	7.91442	12.4188	6.96761	12.8063	8.78738	9.86716	5.55796
ENSMUSG00000021951	Eef1akmt1	26.259	59.1597	41.1678	53.7355	29.4995	48.6785	39.8446	60.5521	31.7662	51.8936	35.9797	53.3413	29.4667	47.8595	48.2821	53.9058
ENSMUSG00000053641	Dennd4a	3.57349	6.16497	2.31598	3.49163	2.74817	5.79404	3.3265	2.93469	4.11834	4.44109	3.20929	3.74575	5.40449	10.2321	3.58213	11.181
ENSMUSG00000091119	Ccdc152	3.64766	2.95128	5.71234	5.7091	1.88617	2.63208	5.16082	3.53993	3.14221	1.1883	4.8681	1.61196	3.07162	1.70442	3.50412	1.87282
ENSMUSG00000038894	Irs2	5.14064	13.9055	13.7878	20.1579	9.13731	17.9172	16.6854	20.9799	9.76994	13.9285	14.8154	17.2471	13.1997	17.0294	13.2095	14.4362
ENSMUSG00000053931	Cnn3	0.412291	0.889546	0.400754	1.32888	0.407157	1.20026	0.795117	1.19207	0.534411	0.805874	0.481389	1.85968	0.818872	1.28876	0.698314	3.11292
ENSMUSG00000098320	Vis1	7.84428	2.60378	5.66971	2.63558	6.91236	5.87799	8.43674	3.37297	9.07276	5.30745	6.62643	3.5554	4.87792	6.20292	5.44378	4.00366
ENSMUSG00000078956	Gm14221	1.09204	1.10445	0.641312	1.5502	1.43343	3.7676	0.477148	1.65327	1.2828	2.33464	1.24921	1.36734	1.65525	2.42379	0.957844	0.388168
ENSMUSG00000035561	Aldh1b1	0.707457	1.57409	0.540101	4.13295	0.63315	2.01004	1.2806	1.48298	0.747932	1.94458	0.485568	1.40687	0.670203	2.89249	0.797813	1.55071
ENSMUSG00000085795	Zfp703	1.65102	5.76736	2.06844	4.32683	1.80128	5.33269	2.90518	4.63893	2.26574	4.226	3.04582	5.58985	2.78059	3.91856	3.12614	2.90635
ENSMUSG00000057069	Ero1lb	7.09903	9.4185	5.51382	6.35151	6.28507	11.5257	6.71819	9.76068	6.37537	12.617	6.12987	10.2549	7.43388	14.2583	5.50931	17.7721
ENSMUSG00000032246	Calml4	2.69142	0.879218	1.10417	0.877537	1.62844	0.718023	0.946457	0.900566	2.03053	0.592758	0.953992	0.692412	1.87696	0.389682	1.36796	0.395245
ENSMUSG00000079671	2610203C22Rik	11.2888	4.87925	7.87261	6.20188	8.90086	6.54068	7.70121	4.97363	10.6956	4.92755	7.80324	5.46108	9.02841	3.29137	6.00178	3.02209
ENSMUSG00000019876	Pkib	5.22748	2.82918	2.51393	2.0136	3.99674	2.23395	2.10238	1.5613	4.7854	2.91936	2.20629	2.23822	3.71964	2.23106	2.29881	1.88947
ENSMUSG00000005087	Cd44	14.3139	26.6052	21.9491	19.3062	15.2165	28.2549	23.8063	17.974	18.1392	31.7361	29.8497	30.8994	16.3703	35.6985	21.9798	35.6091
ENSMUSG00000005413	Hmox1	205.609	285.916	424.765	503.659	234.776	358.303	584.286	674.495	313.959	339.916	488.216	497.531	328.285	273.371	515.214	220.16
ENSMUSG00000042549	Map2k3os	7.89149	17.9386	14.1238	20.1888	11.6589	23.4892	24.1129	22.844	12.978	22.6783	18.1405	17.1601	10.4426	19.0517	15.3503	11.3092
ENSMUSG00000003283	Hck	14.7878	22.504	13.6335	12.0272	14.7954	19.1502	12.1452	11.3009	13.1417	17.1857	12.1613	8.77704	13.7876	19.9425	15.629	8.52441
ENSMUSG00000037822	Smim14	19.3401	10.7918	12.7345	8.5274	18.3161	11.9335	11.589	10.4808	17.1925	11.6409	11.7813	9.59669	16.7862	10.0993	10.8981	8.17241
ENSMUSG00000040699	Limd2	7.89478	13.0793	5.38014	10.2502	7.66083	12.3481	4.87369	7.88052	8.4178	14.5623	5.33924	9.17577	8.78857	13.6208	11.4795	13.8974
ENSMUSG00000036636	Clcn7	14.6213	5.88263	10.3976	6.84	15.8361	6.86427	12.3382	8.71837	13.3555	7.68161	14.0112	9.89804	14.3711	9.11869	10.1415	7.69634
ENSMUSG00000028398	Tmem261	55.4865	82.9889	65.9775	100.374	43.594	66.4347	53.78	95.0008	43.991	88.9397	58.8665	95.4777	43.3335	57.9723	75.9656	58.0242
ENSMUSG00000042834	Nrep	1.79229	2.59129	2.79521	5.95607	2.92806	4.53983	4.24426	8.7965	2.25731	3.66578	3.73696	3.61455	3.3048	4.43776	4.09334	4.09829
ENSMUSG00000030218	Mgp	1.36582	0.982282	2.48114	7.55651	1.39077	5.22341	1.0003	8.05892	4.70624	6.49618	2.16652	4.0775	4.78454	5.53106	5.65903	4.66064
ENSMUSG00000032577	Mapkapk3	3.58052	8.35347	4.87421	4.37141	4.79765	8.97657	5.18072	6.80218	4.20597	8.37931	4.79659	6.88837	4.74059	9.78635	4.60538	7.73844
ENSMUSG00000109132	NoGeneName	3.08902	4.91088	4.58289	4.54478	1.55204	8.44665	3.89686	3.18081	1.98619	4.29007	2.97567	2.2991	1.80715	1.36742	2.28162	1.54105
ENSMUSG00000000058	Cav2	57.9554	31.2755	36.5888	28.0704	45.8813	32.8113	32.2566	26.3423	61.87	38.8646	39.9735	34.5221	55.6397	28.7417	33.2329	28.8908
ENSMUSG00000022265	Ank	31.6318	26.6573	21.4473	26.1145	34.8358	30.2526	24.5314	29.7715	30.8052	29.9643	22.1285	41.6148	30.0293	46.268	19.3674	67.6988
ENSMUSG00000022014	Epsti1	19.0055	36.1056	27.5918	36.4073	17.4966	37.2607	26.82	34.0023	17.8229	34.968	25.2687	29.2522	18.7219	30.0861	27.1593	25.5682
ENSMUSG00000024193	Phf1	10.1362	7.16415	11.4477	7.98225	8.57998	4.48573	13.2148	5.34968	9.61927	5.1727	12.3833	8.88515	8.07297	7.55939	11.412	6.86272
ENSMUSG00000024900	Cpt1a	82.4172	42.8121	69.8874	54.9956	93.1103	40.6953	74.761	68.3748	68.9691	38.096	64.5306	39.4213	79.7196	52.0593	49.2249	48.0168
ENSMUSG00000000386	Mx1	0.137846	1.40208	0.379316	1.48802	0.150391	1.23623	0.334335	1.42183	0.240574	0.914161	0.351414	0.951456	0.179091	0.864942	0.266488	0.830626
ENSMUSG00000046546	Fam43a	8.12509	5.91439	13.5271	13.7821	9.11195	7.21479	11.7385	9.29679	8.04323	5.39662	13.6079	7.39039	7.29368	6.67164	11.031	4.78542
ENSMUSG00000037071	Scd1	0.326034	1.32572	1.79095	2.25659	4.1898	1.98161	1.90358	7.57035	0.989871	1.83829	2.75416	2.95549	4.30828	10.6875	1.81009	5.84796
ENSMUSG00000038775	Vill	0.24679	1.21182	0.0639692	0.661631	0.203098	0.709246	0.110487	0.277492	0.255912	1.29744	0.179121	0.762172	0.361172	1.51104	0.375345	0.855038
ENSMUSG00000031906	Smpd3	0.124811	0.791032	0.630349	1.13119	0.402124	0.70923	1.27765	1.03198	0.322548	1.76869	1.1993	2.22462	0.457188	1.54547	0.907064	1.40487
ENSMUSG00000028582	Cc2d1b	7.10502	3.80132	5.3408	2.79302	7.78174	2.97219	5.96432	3.70327	6.58668	3.01212	5.518	3.56413	6.56837	3.67884	4.60055	3.30362
ENSMUSG00000068957	4930589L23Rik	0.53351	1.24701	0.835493	2.87402	0.424421	1.53988	0.710425	1.57397	0.919166	1.21661	0.650983	1.88614	0.0898518	0.83097	0.356533	0.674266
ENSMUSG00000101625	Gm29371	4.93361	5.17446	7.98372	6.34504	8.89624	6.97167	10.265	12.3847	6.56814	6.42891	8.65366	12.597	7.06265	8.19665	8.37994	21.4337
ENSMUSG00000039377	Hlx	6.81466	3.93833	5.98392	4.99631	6.69909	4.30266	7.49451	4.42153	4.99362	2.10109	8.27805	3.29832	6.55828	3.26007	6.70914	2.19159
ENSMUSG00000020936	Nmt1	30.8197	20.5789	18.9841	14.2358	32.9212	18.7287	16.8786	15.9893	27.3536	19.6866	20.2039	16.9253	27.5608	19.559	17.1231	15.3703
ENSMUSG00000075273	Ttc30b	2.30428	0.57365	3.49753	1.47099	2.70736	1.53482	2.25703	0.825682	2.41529	1.126	2.59537	0.783306	2.14935	0.331295	1.59912	0.924067
ENSMUSG00000009772	Nuak2	15.0673	17.1817	10.1038	14.0124	14.5076	16.5542	9.88069	12.8437	13.5345	18.07	10.4492	13.0924	15.5861	27.3281	10.6653	29.0404
ENSMUSG00000089662	Gm14057	2.26465	5.15759	1.89147	1.09907	2.64233	2.72355	2.51302	0.937714	2.60113	4.18062	1.61193	3.55836	3.55977	4.70308	1.26118	1.66958
ENSMUSG00000022667	Cd200r1	17.9919	12.5446	19.2189	28.0262	16.1994	13.1193	17.2877	22.4789	18.7588	20.6563	20.5555	34.6829	18.3339	14.7255	18.0354	30.6973
ENSMUSG00000004846	Plod3	9.40434	4.98828	8.47966	5.74682	11.0462	4.15863	7.75243	5.70228	9.63537	4.77014	9.36267	5.06741	9.20961	5.57379	7.01992	4.9017
ENSMUSG00000038280	Ostm1	25.7544	14.3037	17.8347	14.0983	24.8847	15.0288	17.0681	13.6475	25.132	13.619	19.1232	13.6184	25.3795	13.8185	16.3409	11.6897
ENSMUSG00000039461	Tcta	12.782	6.54395	11.9763	9.11569	14.0979	8.40254	11.3951	9.78905	12.4869	6.06957	10.1443	7.10594	11.7486	4.8928	9.84494	4.55195
ENSMUSG00000022235	Cmbl	0.946232	2.10161	1.56899	2.43117	0.371948	0.481964	0.945006	2.02239	0.941523	2.5567	0.967811	3.67321	1.23739	2.75688	1.61806	1.68829
ENSMUSG00000023966	Rsph9	3.3905	2.18174	4.97428	2.49417	3.97486	1.99584	4.75243	3.43583	3.63339	3.08104	4.08261	2.2431	4.62823	1.22294	5.18748	1.40954
ENSMUSG00000026986	Hnmt	4.39027	5.92783	9.28829	6.23528	3.73141	4.26138	7.89224	4.48601	5.19043	4.9827	8.55385	4.03881	4.75119	3.17639	8.29069	1.87935
ENSMUSG00000020547	Bzw2	13.563	13.7171	15.3174	15.4938	11.8894	12.1394	14.9781	21.5662	15.9935	23.7703	15.8135	24.436	12.5852	29.372	17.3869	41.4112
ENSMUSG00000025044	Msr1	65.5597	49.4908	56.8564	45.0826	53.1437	37.5502	44.1638	32.075	62.5505	51.9729	51.0727	35.8835	65.0952	37.8031	53.2382	18.8549
ENSMUSG00000110649	NoGeneName	2.87404	3.41052	5.13096	2.51067	3.84111	1.55539	5.45361	6.96175	2.43078	1.12354	2.89317	2.03214	3.77548	0.805765	2.59289	0.544845
ENSMUSG00000027555	Car13	4.27319	3.64235	6.69194	3.59466	4.18004	2.68374	4.79452	3.04727	4.31316	3.50598	5.06926	1.55423	3.51841	3.00739	4.75946	1.55017
ENSMUSG00000021978	Extl3	4.95122	4.48757	2.04013	2.3576	5.50144	3.42628	2.87772	1.96611	4.71009	2.5186	2.67407	2.43911	6.29501	3.33756	2.2375	3.30827
ENSMUSG00000021262	Evl	1.20926	3.3016	1.02402	2.24316	1.5677	2.31072	1.0586	1.84986	1.57132	3.41417	1.07932	2.79732	1.31247	1.9672	0.987707	2.32076
ENSMUSG00000038527	C1rl	0.805878	2.17342	2.6124	2.60476	1.53863	4.92827	1.89136	3.90413	1.09811	2.04775	2.28623	2.04182	0.814338	2.03342	3.15052	1.48955
ENSMUSG00000001741	Il16	2.07517	2.7691	4.89423	4.18617	2.33107	2.25512	5.27691	3.80453	2.14592	1.87333	5.1252	2.1803	2.40854	1.68229	3.83455	1.67471
ENSMUSG00000021494	Ddx41	40.9233	28.6008	39.2791	28.4456	46.9954	32.5062	36.6404	22.5989	42.4892	26.1256	34.0277	20.8719	36.9063	24.4166	31.8694	17.2574
ENSMUSG00000034738	Nostrin	7.97859	16.1858	12.2118	15.1232	7.37709	16.3483	10.474	11.8745	7.35637	13.9277	10.6538	15.2566	8.77224	14.7718	11.1668	16.9328
ENSMUSG00000025212	Sfxn3	32.7256	16.9959	23.8404	17.5973	31.6679	15.3275	24.2646	14.3132	33.1841	17.2143	28.2087	18.7143	26.3593	16.0558	23.7662	20.0482
ENSMUSG00000039234	Sec24d	10.7109	5.67869	7.72473	5.93889	9.2839	4.94962	9.01225	3.88167	10.3902	5.65105	9.57875	5.34106	10.2482	6.02097	8.15952	5.12442
ENSMUSG00000038147	Cd84	42.2952	29.9822	21.7444	30.5149	36.9271	24.5337	20.19	23.7264	37.5497	33.0148	19.702	29.3044	34.8812	22.7249	19.0619	24.2581
ENSMUSG00000033712	Ccar2	14.4915	8.02786	14.6898	9.95065	14.8934	6.25287	17.7975	16.7546	13.3423	5.90113	15.8006	10.7695	13.6212	11.2856	12.8907	10.4877
ENSMUSG00000059482	2610301B20Rik	3.13918	1.23349	2.46128	2.19746	3.43337	1.19259	1.95166	2.03367	3.47752	1.21906	1.97861	1.34745	3.31919	1.80682	2.45906	1.3991
ENSMUSG00000051851	Cxx1c	7.86384	5.54683	14.4938	8.7191	8.662	6.54738	10.5722	9.58059	7.10577	6.79865	11.3484	3.9207	8.55765	5.37043	11.5211	7.16723
ENSMUSG00000074476	Spc24	0.750834	2.59196	0.634947	1.07131	1.57689	2.5464	0.749861	0.909366	0.89375	2.29924	0.435175	1.56317	1.08749	2.80671	1.9318	2.2537
ENSMUSG00000003429	Rps11	80.5509	144.19	90.383	125.569	66.8878	141.507	74.6104	133.437	74.4051	142.553	74.3446	140.227	72.5389	115.914	92.174	134.077
ENSMUSG00000025371	Chmp6	18.7787	9.2029	16.7485	11.1188	18.1088	7.257	13.7187	11.3502	17.0325	11.2673	14.1173	10.6955	14.404	7.64119	13.3326	8.5253
ENSMUSG00000011148	Adssl1	44.898	34.4373	23.883	36.6863	37.7024	35.5266	18.0559	25.7625	38.0862	42.3798	19.9335	39.3876	39.6392	40.8052	23.6067	45.4664
ENSMUSG00000022150	Dab2	153.367	123.646	215.623	159.867	146.288	109.064	197.673	153.718	152.774	110.667	219.86	113.038	140.71	100.698	185.657	61.9133
ENSMUSG00000036061	Smug1	2.55064	0.438659	2.84816	1.77606	2.82309	2.04054	3.83946	2.34186	2.39695	0.541906	2.33419	1.74248	2.31594	1.48546	2.59386	1.78698
ENSMUSG00000017929	B4galt5	3.78095	10.5268	6.74364	8.97917	5.70589	12.4977	8.45654	7.36141	5.48926	11.351	5.84281	11.1524	8.92245	12.8218	7.58017	7.81152
ENSMUSG00000032399	Rpl4	86.319	166.197	114.876	128.664	88.2499	157.925	103.424	136.387	85.4634	151.873	91.2812	135.757	79.6831	150.759	112.51	156.487
ENSMUSG00000032601	Prkar2a	4.05866	5.75491	5.28035	7.80249	6.09038	7.80157	6.38512	7.1325	6.26329	6.12896	7.46576	10.6696	6.57025	13.9793	7.13003	19.9045
ENSMUSG00000004552	Ctse	0.218256	1.38916	0.0205077	0.247859	0.416707	1.0158	0.108986	0.996353	0.0820418	0.767894	0.0199735	0.308643	0.198492	0.79547	0.196905	0.455133
ENSMUSG00000024754	Tmem2	3.55105	2.52755	5.52091	4.27734	4.15879	3.25909	6.36166	4.59584	4.50677	2.69231	7.0522	2.67476	4.5039	3.25014	5.8899	3.03628
ENSMUSG00000089762	Ier5l	0.768483	0.975326	4.20505	5.6075	0.604155	1.27214	1.2641	1.22134	0.849621	1.23702	0.868746	2.77011	1.64446	1.56308	1.94851	0.81412
ENSMUSG00000004610	Etfb	3.88211	9.32159	5.14796	8.01327	3.61632	6.47226	5.28409	8.77939	4.38372	8.81195	4.32625	8.26425	4.17595	6.99259	5.64894	7.68592
ENSMUSG00000026458	Ppfia4	0.9699	2.00779	0.551727	1.37853	0.985954	2.24712	0.54977	1.41646	0.571509	1.26557	0.412612	0.969983	0.614537	1.45514	0.478239	1.11812
ENSMUSG00000025870	Arl10	3.99788	5.46629	5.41632	6.21326	3.46148	7.7487	4.92124	9.18162	3.23276	5.63361	4.55202	6.73824	2.53665	4.90912	3.49495	5.41984
ENSMUSG00000023034	Nr4a1	260.316	228.097	116.31	200.338	258.474	206.198	148.349	177.119	254.674	195.862	161.778	243.623	327.102	293.165	172.735	338.8
ENSMUSG00000057315	Arhgap24	1.16339	0.165865	0.19744	0.13879	0.988293	0.427136	0.250803	0.019099	0.895823	0.295519	0.182916	0.102673	0.947732	0.402321	0.184948	0.106874
ENSMUSG00000029552	Tes	9.4609	7.37912	4.28103	6.36394	8.76771	5.30877	3.90192	4.8159	7.73852	7.75417	4.15851	7.23916	7.68947	7.70682	4.22974	11.3265
ENSMUSG00000047407	Tgif1	14.4959	29.1511	13.2183	21.2526	13.6599	28.7256	16.8563	24.3991	16.8562	30.4797	15.7024	24.312	16.0169	26.6427	15.2958	26.2335
ENSMUSG00000035248	Zcchc6	36.5099	25.1733	48.6763	29.6798	41.2569	25.8719	47.7876	30.0247	39.1762	22.1008	52.2071	21.9373	41.2427	28.5862	40.8034	21.9114
ENSMUSG00000023348	Trip6	3.32019	2.84435	7.52401	3.81034	3.44922	5.63715	7.21694	4.85215	3.45662	3.37211	6.73224	3.45235	3.61819	2.67694	7.14588	1.72783
ENSMUSG00000104200	Gm37399	1.1662	3.45971	4.38312	2.80157	0.834966	4.10234	2.62055	2.71622	0.821947	1.70961	1.60086	1.71788	0.88383	0.817386	1.46127	1.93446
ENSMUSG00000046223	Plaur	48.2354	85.5448	54.3639	50.4332	49.8643	107.644	67.2495	62.6842	54.3041	98.0505	62.1781	89.3874	56.228	93.2746	76.1964	110.411
ENSMUSG00000029338	Antxr2	12.7797	24.0898	27.3685	27.3645	13.1582	27.2976	28.8999	24.3052	16.4335	21.5852	28.5179	22.798	16.0806	29.8701	25.3219	28.1362
ENSMUSG00000022479	Vdr	0.0515885	0.426672	0.0484735	0.22533	0.049248	0.539767	0.0858695	0.0320416	0.14544	0.520987	0.125896	1.62118	0.10426	1.06064	0.120664	2.07007
ENSMUSG00000034663	Bmp2k	11.9562	8.18442	8.82232	8.541	14.6919	6.76688	9.38849	7.59958	13.5623	7.26964	9.7514	6.64153	15.5863	9.15838	8.7601	5.94763
ENSMUSG00000025877	Hk3	3.56077	7.172	7.04047	7.95772	3.57996	4.67376	7.19231	7.7677	3.68836	4.80366	7.07698	5.68929	3.66437	5.30791	8.47453	3.64434
ENSMUSG00000034216	Vps18	11.6482	5.89612	11.2307	5.33453	15.3622	6.90364	13.6732	7.09633	12.1206	6.88133	14.0804	8.19508	12.2755	8.20482	9.58506	5.70589
ENSMUSG00000089855	Gm15662	77.8053	158.818	185.635	129.273	76.4598	189.069	148.553	226.7	134.765	232.593	79.5796	142.028	90.1841	115.483	101.697	117.131
ENSMUSG00000033880	Lgals3bp	21.0655	41.3308	26.0666	33.7777	19.2165	36.3223	19.6744	34.4214	20.1527	38.4565	19.4168	25.51	20.1878	34.3152	15.3874	14.4062
ENSMUSG00000007039	Ddah2	7.88682	5.2193	7.00581	4.77644	9.80667	5.52359	7.31398	5.92758	7.59844	4.82552	6.27745	3.67081	7.93612	3.93298	6.6436	2.01027
ENSMUSG00000026678	Rgs5	0.679536	1.00458	0.236483	0.70355	0.240261	4.03169	0.402166	0.750327	0.30747	0.885492	0.760066	0.771137	0.890127	1.24658	1.63988	0.834962
ENSMUSG00000033209	Ttc28	1.57827	0.400302	0.35331	0.324152	1.30357	0.305241	0.518821	0.566955	1.33439	0.294954	0.611243	0.390639	1.84982	0.513226	0.674495	0.323587
ENSMUSG00000023088	Abcc1	5.66441	3.83439	6.4215	3.71282	6.03577	3.94077	9.06033	4.27856	6.06183	3.03629	8.63613	4.51662	6.9363	4.32343	6.80543	4.8201
ENSMUSG00000032812	Arap1	10.4077	5.08957	8.02592	7.42569	10.8985	4.89806	15.335	8.66265	9.20327	5.08133	13.6449	7.748	11.1471	8.60804	9.47234	6.64055
ENSMUSG00000104960	NoGeneName	1.86911	3.28594	1.88634	3.14464	1.25563	3.44672	2.69633	3.6117	1.17099	3.45045	2.47073	4.24213	1.25916	2.39369	3.46969	2.42786
ENSMUSG00000042129	Rassf4	24.4574	39.3169	36.7501	46.3554	25.0414	45.7618	44.0564	47.1589	28.2398	36.9216	42.3056	44.9571	28.7353	50.752	35.5289	58.9918
ENSMUSG00000034330	Plcg2	39.45	22.9838	18.3483	19.9674	45.607	22.938	19.7276	19.9278	31.8753	22.973	23.3968	31.4586	36.87	57.5687	21.0739	58.4441
ENSMUSG00000015947	Fcgr1	29.1707	56.2911	26.8018	41.2638	31.4053	44.2112	24.9168	37.1334	30.3795	53.3752	23.18	26.8913	29.0926	33.5163	26.0769	11.6801
ENSMUSG00000050192	Eif5a2	6.27293	1.40548	3.58183	3.51973	4.56034	1.74964	3.97574	4.60789	4.57992	2.26361	2.82615	2.21769	6.09498	4.57706	3.91796	5.12265
ENSMUSG00000031004	Mki67	5.38232	12.8675	4.95018	6.62438	6.62949	12.3302	9.97628	7.18168	6.15105	8.71501	5.20735	6.50402	6.98289	15.1964	9.48755	11.3168
ENSMUSG00000007817	Zmiz1	8.2375	3.91711	4.64618	3.6842	6.16291	4.13763	6.3123	3.70853	6.67084	2.9315	5.92346	3.08964	7.89666	4.7791	4.58368	3.61278
ENSMUSG00000008734	Gprc5b	1.62553	0.679967	1.38711	0.970824	1.39344	0.359067	1.55716	0.726305	1.37171	0.502533	1.62421	0.684143	1.32413	0.387528	2.22804	0.235836
ENSMUSG00000004931	Apba3	15.4917	10.0025	22.5109	9.40774	16.878	10.0357	21.6258	11.8038	19.3208	12.6638	23.0839	14.3877	18.1567	13.6702	20.4939	11.8456
ENSMUSG00000072235	Tuba1a	93.687	40.988	63.8226	45.579	95.6397	45.1374	76.5016	41.7364	96.2677	54.5409	70.7303	76.8015	83.0442	60.0121	66.9387	97.8973
ENSMUSG00000029119	Man2b2	3.13135	2.35512	1.05673	1.63741	4.42077	1.95719	1.89399	1.1094	3.23279	1.63791	2.44184	1.84506	3.89957	2.08141	1.83472	1.67218
ENSMUSG00000021796	Bmpr1a	0.979453	0.139029	1.13828	0.303969	1.40252	0.0697455	0.785121	0.540299	1.02943	0.226713	1.41527	0.136685	1.17205	0.313139	1.30479	0.280962
ENSMUSG00000022358	Fbxo32	5.57812	4.88575	3.99259	4.49097	5.92598	6.90822	2.51476	2.73689	6.93456	8.57894	3.50453	7.27412	8.03976	5.21292	2.73445	4.11053
ENSMUSG00000047388	Atmin	12.4095	6.1436	10.2815	8.01633	15.36	7.34839	10.6548	8.66516	12.5498	8.28783	12.1985	4.51318	13.6706	10.0632	9.12394	6.67097
ENSMUSG00000033538	Casp4	5.01822	12.4405	11.507	9.92875	5.15538	12.9315	11.8655	13.1587	6.21492	10.7993	10.1428	9.30134	5.82649	7.53144	9.29448	7.60745
ENSMUSG00000047798	Cd300lf	0.194366	1.15324	0.0405845	0.179225	0.092774	0.818131	0.0431366	0.130781	0.131917	1.38246	0.0790546	0.8653	0.360079	1.34213	1.59116	1.00305
ENSMUSG00000015340	Cybb	86.5386	151.819	107.211	118.973	94.9886	179.805	139.293	132.025	89.2878	153.193	96.7525	120.78	82.3487	160.785	115.522	147.773
ENSMUSG00000050786	Ccdc126	4.23713	2.49325	6.17702	3.70142	4.80484	3.05743	5.94994	3.58865	5.62281	3.73945	5.96912	2.42096	5.37147	1.77588	5.30278	1.75255
ENSMUSG00000002257	Def6	10.8999	3.18879	11.7173	5.85026	14.9026	3.79928	9.96327	5.63682	9.15806	5.91311	10.8203	6.80347	10.6876	10.4021	12.7319	10.6382
ENSMUSG00000057193	Slc44a2	1.74056	0.864803	0.423053	0.278198	2.0023	0.736933	0.65255	0.67012	1.68728	0.740529	0.643173	0.407643	2.21935	1.69844	0.765056	1.05131
ENSMUSG00000063077	Kif1b	3.58287	2.13686	4.47191	2.60286	3.71787	2.11494	5.0845	2.76967	4.06936	2.12584	6.03318	2.74503	4.41976	2.57152	3.9443	1.94426
ENSMUSG00000021703	Serinc5	6.47947	2.41202	6.36691	4.80324	8.14569	3.30904	10.2307	6.14286	6.81801	3.85745	8.26808	4.08671	7.95381	6.24715	7.15836	4.58465
ENSMUSG00000002732	Fkbp7	7.42468	5.036	7.35234	5.12662	7.63957	3.27225	6.83784	6.25446	8.27249	4.17125	5.53336	4.92491	8.49099	3.24078	7.3535	3.87703
ENSMUSG00000039384	Dusp10	2.58713	4.65159	4.05152	4.00779	2.33803	3.36028	3.58284	5.36692	3.20924	3.91064	5.05086	6.09758	2.54457	3.67498	4.4952	7.19332
ENSMUSG00000022283	Pabpc1	9.82437	21.1968	10.4693	16.1615	8.63134	18.1463	12.2222	19.8129	10.7895	18.4251	10.0533	17.4354	10.033	16.0579	11.7314	21.1968
ENSMUSG00000042303	Sgsm3	3.5453	1.86713	2.53558	1.47943	4.19281	1.50069	3.52212	1.88989	3.43661	1.30046	3.06562	1.83128	3.44147	1.58268	2.19202	2.20505
ENSMUSG00000014846	Tppp3	149.829	157.678	291.23	142.585	175.566	160.915	308.162	127.459	183.199	175.789	284.123	210.423	133.181	158.409	284.707	169.961
ENSMUSG00000004665	Cnn2	35.4254	49.9248	43.5853	48.5944	35.7673	49.8969	36.0592	38.9441	38.542	51.425	38.6802	58.9269	33.2274	69.9949	54.3617	116.286
ENSMUSG00000009894	Snap47	4.01642	2.01386	3.15378	2.25671	4.15822	1.63277	2.12802	1.96757	4.5541	1.95344	2.83004	2.53323	3.73466	1.67408	2.8353	2.23419
ENSMUSG00000106019	NoGeneName	2.73258	3.62814	1.1192	0.918113	0.869536	4.6261	1.11961	1.04443	2.50209	1.78039	1.79537	0.577984	1.91165	1.5715	1.26424	2.05883
ENSMUSG00000058672	Tubb2a	78.1765	137.696	145.905	158.39	84.7898	128.043	150.798	183.759	90.5912	144.724	156.329	166.478	76.9855	103.827	121.501	94.4956
ENSMUSG00000039001	Rps21	16.357	23.8101	13.2216	23.8357	10.1599	26.5952	13.197	21.8935	11.9481	25.0609	10.3279	26.4306	11.3319	18.1564	15.1793	17.9417
ENSMUSG00000018559	Ctdnep1	2.54909	5.43734	3.18449	5.18744	3.01415	6.49007	3.35581	4.18298	2.88548	6.51125	3.76426	5.73484	3.51252	6.52399	3.36829	8.09981
ENSMUSG00000004771	Rab11a	86.9011	47.3149	69.3924	49.3099	72.1134	41.8533	67.2753	45.2011	85.8751	52.4728	71.5546	47.6424	83.7173	38.4626	79.2876	37.1749
ENSMUSG00000029007	Agtrap	12.6554	6.71741	15.3496	8.78697	12.8513	8.29508	15.5343	13.0821	12.106	7.98268	13.7731	7.69448	13.0939	7.51545	13.9495	6.11731
ENSMUSG00000020536	Llgl1	6.58325	3.52299	4.93154	3.23771	7.299	2.62298	6.53589	3.81518	7.01469	2.39371	7.19869	3.84845	6.57378	4.80796	5.55992	4.18871
ENSMUSG00000047875	Gpr157	1.75739	1.62882	1.30241	0.562185	1.22871	0.99126	0.815757	0.299781	2.00041	0.749903	2.01599	0.612545	1.32563	0.78647	1.16615	0.211155
ENSMUSG00000012483	Rpa3	6.36924	12.5808	8.17621	14.9678	6.33718	11.4574	8.69036	13.5393	7.08139	16.5701	8.04532	12.8973	8.06779	11.5692	14.8375	12.3295
ENSMUSG00000007892	Rplp1	187.882	357.647	201.43	340.569	190.031	367.254	219.923	359.59	217.218	377.215	196.183	368.059	177.574	301.418	281.651	268.86
ENSMUSG00000012848	Rps5	20.6894	41.9818	24.3611	36.7587	19.9735	40.2412	25.2198	36.6182	23.9015	40.6935	23.7977	38.9857	21.5354	36.3438	28.2763	39.3939
ENSMUSG00000059878	Zfp422	10.5086	7.63477	12.225	7.86852	10.5914	5.24605	11.6944	8.03203	10.1038	6.07826	12.7832	6.75632	10.0988	5.5984	11.0069	3.46933
ENSMUSG00000022451	Twf1	15.379	6.11998	12.4294	12.0724	14.2193	8.38111	15.7082	11.3721	16.1452	10.3266	15.6979	12.2618	17.877	8.51778	16.9524	8.2571
ENSMUSG00000032640	Chsy1	4.41458	2.41252	3.57493	4.08477	4.60245	4.05519	1.68233	5.81749	3.52083	3.91704	2.73761	4.44936	3.99135	4.8041	2.41642	7.73573
ENSMUSG00000027397	Slc20a1	4.92018	7.97606	7.32197	9.00666	4.54462	8.88536	7.21577	8.70523	4.69036	8.30017	6.53089	9.71584	5.33912	8.52505	6.66496	11.092
ENSMUSG00000034652	Cd300a	18.8679	29.3903	14.7816	16.3736	19.6633	25.5949	14.7665	16.8245	15.6959	21.9064	11.4467	16.3241	17.0914	22.9131	12.3761	18.9343
ENSMUSG00000029614	Rpl6	15.7719	31.0347	19.7662	26.8435	14.6988	28.7537	17.4674	26.4119	16.9951	27.9002	16.4493	26.4517	14.0899	26.9054	21.0873	27.3939
ENSMUSG00000020282	Rhbdf1	7.07105	3.70431	7.8311	5.46601	7.83481	4.22136	8.70458	6.56403	7.25849	3.77847	7.62711	5.28546	6.82828	3.5893	6.73969	2.1779
ENSMUSG00000028862	Map3k6	0.889434	1.57196	0.99576	1.57049	1.15619	1.24946	2.00336	0.952053	1.24487	1.53507	2.45919	3.32285	1.6828	3.6962	2.12462	6.3858
ENSMUSG00000040253	Gbp7	4.99434	7.77523	13.5303	13.2323	5.31018	9.2739	13.3358	16.9262	6.94174	8.34451	9.30526	9.216	6.54266	6.9731	10.0728	6.61909
ENSMUSG00000052698	Tln2	1.25678	0.104087	0.792689	0.311211	1.35564	0.257066	0.985841	0.28811	1.11131	0.164414	0.796945	0.233236	0.954983	0.27513	0.555512	0.0609706
ENSMUSG00000049225	Pdp1	2.45005	1.77006	4.27634	2.26999	2.76414	1.67147	4.24866	1.81915	2.81872	2.12599	4.42992	1.94233	2.98592	1.90804	3.78814	1.63971
ENSMUSG00000062647	Rpl7a	11.7824	21.7122	13.2317	19.5715	10.0144	18.4657	11.3297	18.812	10.3522	21.1681	11.0231	18.195	9.53818	17.2329	13.8526	19.2227
ENSMUSG00000021044	Adck1	2.81042	0.971365	4.38411	1.88303	4.21973	1.68339	4.8778	3.63515	3.53853	1.62666	4.04518	2.25082	2.97778	2.85592	2.81721	2.19838
ENSMUSG00000063457	Rps15	49.4416	83.9719	56.768	82.4277	45.1463	90.0067	43.7279	73.5729	43.1665	83.924	38.4126	92.1294	42.3007	70.6287	64.4181	60.2694
ENSMUSG00000063931	Pepd	174.291	110.04	213.256	151.589	195.094	108.2	184.241	153.448	172.501	108.728	198.151	130.366	156.32	98.7367	176.687	86.3703
ENSMUSG00000038175	Mylip	46.5017	27.9456	39.3393	28.5464	53.6182	34.6408	50.5555	34.5774	52.6332	35.3431	43.3169	26.1395	49.8316	32.1302	39.5862	21.1002
ENSMUSG00000046432	Ngfrap1	4.98478	11.1337	7.4215	7.54378	4.62458	11.1707	7.81807	8.56862	4.71741	8.61122	5.49341	6.49481	4.11482	5.6098	6.54514	4.29237
ENSMUSG00000103706	6820402A03Rik	0.685482	1.67617	1.24524	1.87628	0.218127	1.28604	1.18663	2.89511	0.601233	1.25054	0.376388	0.969364	0.369428	0.55519	0.458093	0.866333
ENSMUSG00000034959	5031414D18Rik	9.56186	8.58776	6.96406	6.43455	8.77864	6.38796	4.61482	3.15413	7.30895	6.08091	5.02419	3.98967	8.50647	3.80522	4.35681	3.55598
ENSMUSG00000091089	A930018M24Rik	3.75283	2.30028	5.44962	3.7999	4.15252	4.70818	5.8775	6.35694	2.56487	0.916922	5.0735	1.50767	3.10273	2.31152	5.30086	1.85945
ENSMUSG00000016534	Lamp2	128.835	68.165	100.209	77.6211	118.433	66.3009	103.617	75.1509	124.859	77.6273	103.488	70.019	120.916	59.2931	97.9791	59.1361
ENSMUSG00000085126	Gm12589	0.760405	1.02539	1.25036	1.66066	0.907382	0	0.569565	2.12529	1.07188	2.22946	1.04382	3.58438	2.11307	1.24359	1.33393	3.42364
ENSMUSG00000038578	Susd1	0.089105	0.974983	0.586073	1.41222	0.0486071	0.688891	0.495799	1.42311	0.131585	0.51006	0.337824	0.690035	0.141492	0.392565	0.574203	0.434367
ENSMUSG00000052776	Oas1a	19.4313	35.1914	19.7089	30.3518	15.9085	29.8067	19.4061	25.2364	16.4465	33.3905	16.5459	19.1833	14.6939	24.7734	15.9309	15.4909
ENSMUSG00000038181	Chpf2	3.91312	1.83643	2.43045	1.82506	3.80945	1.22038	3.95221	1.78163	3.22026	1.70691	3.31804	2.05819	3.94303	1.7045	3.05828	1.58215
ENSMUSG00000069792	Wfdc17	2142.39	1112.26	1799.65	1881.86	1865.76	1222.61	1446.71	1958.85	1943.59	1230.92	1481.01	1472.98	1871.02	770.018	2415.82	956.366
ENSMUSG00000039908	Slc26a11	6.84306	4.38444	5.13323	4.52468	5.77466	5.05376	6.66428	2.71215	5.91556	3.25153	6.67755	3.29695	6.66656	3.6215	5.68475	1.66638
ENSMUSG00000021319	Sfrp4	2.96995	1.78825	1.29796	2.8358	0.857156	0.971854	1.37958	9.45911	3.44007	2.49756	1.45378	1.87205	4.67618	2.71097	5.46962	3.40435
ENSMUSG00000001995	Sipa1l2	2.38663	0.940963	1.32238	0.948947	1.9463	0.695037	2.1858	1.35105	2.1523	0.590965	2.33591	0.920688	2.97946	1.24521	1.58242	0.618813
ENSMUSG00000058135	Gstm1	25.1201	25.3896	48.9491	36.7011	20.1822	29.3425	39.0625	38.4188	25.9196	29.658	44.2181	29.4437	24.5661	18.5283	43.5679	13.9987
ENSMUSG00000039005	Tlr4	15.3038	11.1232	20.1798	14.1157	14.74	8.10637	19.1604	13.1426	18.0454	10.361	18.4179	11.244	17.296	9.84352	16.4892	7.86081
ENSMUSG00000047821	Trim16	5.59429	4.13736	7.31297	3.30564	6.49254	3.45373	6.83315	3.85891	5.59359	2.58875	7.61852	3.41078	5.32231	3.9951	6.06915	3.10211
ENSMUSG00000042770	Hebp1	1.78945	0.459625	0.507087	0.198502	0.677881	0.522641	0.425506	0.238162	0.934234	0.416392	0.337917	0.167362	1.03327	0.37162	0.911122	0.0807698
ENSMUSG00000022548	Apod	2.11409	2.42939	2.48305	3.21183	1.4917	3.4821	2.68509	5.69469	1.36046	5.12041	0.925289	8.80094	5.82835	6.01296	6.88741	4.9226
ENSMUSG00000033610	Pank1	1.20914	1.13609	3.1885	2.11253	1.41493	1.01322	2.92155	1.50805	1.64944	1.25795	2.90912	1.35596	1.47802	1.18466	2.44368	0.794883
ENSMUSG00000012405	Rpl15	10.3951	20.9575	12.6954	18.3956	10.458	19.4199	12.74	17.8496	11.8049	21.5558	11.8968	18.2173	10.2829	18.4736	13.2999	19.3142
ENSMUSG00000047963	Stbd1	0.198502	0.734197	0.159871	0.421125	0.0270708	1.84159	0.141603	0.0792573	0.21319	0.859136	0.285462	0.267341	0.229241	0.954032	0.0852779	0.913893
ENSMUSG00000022070	Bora	1.76959	4.20959	1.748	3.48807	1.08288	2.16091	1.76729	1.09909	1.15128	2.97109	1.66094	2.62007	1.23796	3.26506	1.6829	2.23645
ENSMUSG00000033102	Cdc14b	2.27006	0.587375	2.22743	0.914689	1.98314	0.326397	2.08307	0.725775	1.89712	0.90052	1.79379	1.18456	1.99763	0.94721	1.81372	0.754294
ENSMUSG00000062380	Tubb3	0.229358	0.148457	0.862036	0.881583	0.0875809	0.397201	0.962057	0.427362	0.301753	0.224155	1.42729	0.810858	0.185413	0.514422	1.37948	1.73922
ENSMUSG00000030613	Ccdc90b	14.3027	6.46935	11.3901	9.3848	10.8373	7.39333	11.0174	8.06677	11.8437	6.33095	11.6803	6.08442	11.7308	5.15474	11.0905	4.89395
ENSMUSG00000027002	Nckap1	0.969319	0.434723	1.02336	0.390083	1.21646	0.459746	1.72946	0.365284	0.941617	0.425765	1.79406	0.705909	1.89295	0.916036	2.09617	0.464557
ENSMUSG00000031681	Smad1	8.85139	6.19555	9.52624	5.61094	8.55412	3.3512	9.60386	5.20347	9.42483	5.48225	8.98919	4.79334	9.01792	6.02521	8.78758	3.17645
ENSMUSG00000035279	Ssc5d	0.576974	0	0.722846	0.189009	0.596696	0	1.96877	0.739112	0.542208	0.422913	1.71604	0.793253	1.06889	1.2132	1.71101	0.227874
ENSMUSG00000017615	Tnfaip1	18.2381	12.0566	15.691	10.612	18.2456	14.3231	18.3115	9.35585	17.2457	10.416	17.9207	8.95204	16.9728	10.7774	14.2393	8.68973
ENSMUSG00000026425	Srgap2	10.7193	6.50331	5.93301	7.10766	10.9731	5.53885	6.67392	5.47185	9.87755	4.81179	7.50358	5.24242	10.9052	5.96882	5.84378	4.06511
ENSMUSG00000001783	Rtcb	48.3765	30.1704	35.3542	24.5016	47.8406	23.2279	27.8904	28.2016	42.4611	30.0184	29.1813	25.4326	44.1061	26.7781	28.3992	21.9122
ENSMUSG00000022434	Fam118a	10.2064	4.68204	12.9063	7.91606	10.1987	4.9041	12.0032	9.28661	10.0844	6.71205	10.9989	7.75618	10.5063	6.86395	8.84463	5.60571
ENSMUSG00000027306	Nusap1	2.45702	2.54386	0.821203	1.46933	3.29007	5.58655	2.22328	2.81142	2.51043	3.67444	0.905446	2.37079	2.56613	4.5461	3.38864	4.93924
ENSMUSG00000005043	Sgsh	2.55219	0.791562	1.28147	0.836064	2.13946	0.802826	1.83201	1.93934	1.9487	0.693722	1.65682	0.949277	2.57092	1.07329	1.51902	0.703064
ENSMUSG00000021179	Nrde2	4.72368	0.808305	5.38737	3.78495	5.44234	2.92663	5.33573	1.66927	4.68397	2.41969	5.69422	2.91767	4.27948	3.68376	4.40854	3.0879
ENSMUSG00000037447	Arid5a	2.3411	3.85803	5.02363	3.88319	2.81417	3.42781	6.26831	5.04458	2.56446	3.04246	5.77669	3.3174	2.38019	3.94279	4.2184	3.59406
ENSMUSG00000094472	Gm21897	0.565995	4.18688	2.12728	2.82534	0.849068	2.18792	1.29203	0.527308	1.06378	1.58044	1.18392	0.952849	0.735347	0.982317	1.29683	0.843057
ENSMUSG00000051220	Ercc6l	0.571882	2.09759	0.988724	1.4188	1.20106	2.9959	1.18797	1.96068	1.3758	2.41448	1.23511	1.83309	1.38692	3.54869	0.986014	3.36084
ENSMUSG00000022013	Dnajc15	51.6583	79.1501	62.6083	87.3108	46.9918	68.0685	56.2645	78.4684	56.6365	79.5708	57.723	106.093	52.0114	82.2096	82.9281	102.898
ENSMUSG00000055809	Dnaaf3	0.381741	2.23558	0.66614	1.47682	0.364422	1.23956	1.1982	1.27017	0.256242	1.75881	1.09795	1.54238	0.661283	0.917354	0.929327	1.55075
ENSMUSG00000024579	Pcyox1l	2.34088	1.68354	0.733177	1.60037	3.49775	1.06489	1.35527	1.8332	1.91289	0.729434	0.714079	1.11943	2.02263	1.3316	0.884202	0.546674
ENSMUSG00000050379	Sept6	0.794365	1.3843	0.483929	0.983704	0.799991	0.925936	0.60154	0.707538	0.762907	1.62093	0.567186	1.19329	0.599822	2.26786	0.586276	4.29433
ENSMUSG00000023353	Agap3	3.71302	2.06815	7.77479	3.64781	5.36417	4.98483	8.06563	3.39764	4.48327	3.49957	7.67309	5.38834	7.7712	4.97323	6.74819	2.69443
ENSMUSG00000021065	Fut8	8.43107	4.47725	7.3824	5.21029	9.85511	4.28025	6.36073	6.16467	8.38911	4.27295	7.39314	4.21415	8.25581	4.70794	6.75069	4.08238
ENSMUSG00000048332	Lhfp	0.460893	0.406803	1.5879	0.695436	0.546645	0.24187	1.88303	0.676614	0.61687	0.532334	1.58488	0.938145	0.87501	0.783125	1.62402	0.781066
ENSMUSG00000028873	Cdca8	1.43352	3.92083	1.52384	2.21362	2.43286	3.36964	2.47288	2.41476	1.55126	3.07088	0.808328	3.94176	1.33151	4.87153	2.87397	5.46263
ENSMUSG00000042978	Sbk1	9.62616	3.89085	4.8146	4.7369	10.9466	4.84608	5.96198	6.07149	9.20976	3.54918	7.07931	8.5006	10.2802	8.34507	6.23348	11.4585
ENSMUSG00000015396	Cd83	1204.36	1994.29	1085.74	1300.97	1405.43	2444.85	1413.85	1631.43	1285.28	2077.34	1172.49	1313.76	1226.44	1794.78	972.396	1579.91
ENSMUSG00000020346	Mgat1	13.8249	7.36902	12.0409	11.4388	15.6755	7.49446	15.8326	12.2428	14.8833	8.68852	17.758	11.8778	14.881	9.36123	16.3823	8.16898
ENSMUSG00000038776	Ephx1	26.4378	20.8079	45.9373	23.2974	28.3072	27.2515	44.9477	27.2663	24.4823	25.7123	35.8914	26.3064	21.5178	14.2521	33.7458	18.2097
ENSMUSG00000101585	1600010M07Rik	2.21307	3.79178	2.77258	4.16978	1.49129	4.36801	2.94693	2.54693	1.87582	3.90162	2.58122	3.4773	1.40317	3.56862	2.91439	4.35993
ENSMUSG00000016526	Dyrk3	0.85568	0.717962	0.416895	0.609068	0.332794	1.37209	0.284857	0.856243	0.476516	1.08405	0.870076	2.98777	0.672515	1.54008	0.6036	2.58342
ENSMUSG00000108526	NoGeneName	1.25512	3.34939	1.0552	1.78892	0.882869	5.00504	1.78129	0.369263	1.05534	1.87225	0.664989	1.79048	1.66882	1.54336	1.32438	2.31678
ENSMUSG00000027082	Tfpi	2.54005	1.08946	2.93302	1.84463	2.23004	1.09861	2.57241	1.67741	2.47327	1.12157	2.57189	1.13	2.33478	0.729285	2.28543	0.846058
ENSMUSG00000029571	Tmem106b	10.2904	5.41177	9.24598	5.92171	9.76208	4.37166	7.55361	6.89064	9.01756	6.0467	9.32296	5.48729	12.3611	5.6017	7.67195	4.79162
ENSMUSG00000028709	Mob3c	18.3511	25.1899	37.9871	30.8682	17.0146	25.072	37.0577	35.3506	20.3092	25.3089	34.5254	26.0899	18.4496	21.5894	25.9901	16.953
ENSMUSG00000029598	Plbd2	19.892	11.3525	13.3206	10.9224	23.1632	10.8673	15.0174	13.1088	17.6524	10.3192	12.6608	11.8875	18.8386	10.2309	11.3758	10.9467
ENSMUSG00000041625	Ggact	0.889706	0.422312	0.702226	0.248709	1.32497	0.269638	0.49759	0.596802	1.40464	0.382589	0.814207	0.0838775	1.36655	0.299325	0.749159	0.101199
ENSMUSG00000022500	Litaf	148.166	277.247	253.031	282.655	160.187	311.86	261.226	354.004	173.02	284.991	246.761	273.025	168.916	268.577	239.251	254.043
ENSMUSG00000025612	Bach1	7.44138	18.2102	8.30059	11.379	8.71521	15.6062	14.2594	17.3253	8.56609	14.9025	10.1055	11.7863	8.24444	13.2511	7.9106	12.2669
ENSMUSG00000005470	Asf1b	5.6782	12.5155	5.87271	7.85081	7.95538	13.7067	6.44599	7.68774	7.63939	11.6577	5.00944	10.3501	7.67792	15.6903	10.9334	11.5388
ENSMUSG00000041453	Rpl21	14.383	25.5112	15.9189	21.0436	13.0144	25.8586	13.7475	21.2096	12.1896	23.0253	13.2432	19.8351	11.7475	20.3475	16.6954	22.2481
ENSMUSG00000024677	Ms4a6b	33.98	31.2077	39.5058	29.8275	27.894	23.7199	32.1279	23.684	32.1585	26.1688	33.2051	18.7536	35.181	20.1133	44.4939	9.6722
ENSMUSG00000021391	Cenpp	1.54222	3.8028	1.03507	2.02085	1.36709	2.38465	2.20032	3.69464	1.86338	4.62935	1.41135	1.55779	2.56025	4.94144	2.42935	4.07224
ENSMUSG00000008398	Elk3	16.6297	11.1339	17.069	10.4621	16.9288	9.05623	14.9399	9.532	15.7958	10.1887	16.7335	9.1219	16.126	9.17124	16.2662	5.83859
ENSMUSG00000024854	Pold4	8.39663	20.1292	12.6484	14.7865	11.9599	19.9076	11.181	16.3904	10.2704	18.7569	11.7091	20.5752	10.6396	17.9358	13.6274	16.0442
ENSMUSG00000028885	Smpdl3b	12.334	27.8508	26.1327	18.0633	12.3516	14.2662	22.5831	25.3477	13.0681	12.4087	23.5707	15.0337	14.4797	19.8889	24.0004	11.5192
ENSMUSG00000055612	Cdca7	0.51905	2.39976	0.278691	0.885258	0.660668	1.17711	0.444323	0.736871	0.720048	1.57013	0.271431	0.932071	0.474546	2.21745	1.7839	1.42912
ENSMUSG00000037262	Kin	4.99591	6.78501	9.51423	7.75436	4.68408	7.04897	6.32589	13.5062	5.03023	7.62901	6.61302	7.83235	3.96656	7.25336	8.04855	7.31463
ENSMUSG00000106714	NoGeneName	0.467919	1.31244	0.703464	1.59416	0.357352	1.16486	0.700969	1.52578	0.35178	0.777415	0.34257	0.441134	0.709247	1.5305	0.56286	2.92728
ENSMUSG00000008682	Rpl10	21.4143	41.0806	26.293	34.0816	19.3398	39.0245	23.7102	37.4093	22.0725	39.5677	23.6962	33.2185	20.6156	32.0819	27.4157	35.8554
ENSMUSG00000034826	Nup54	4.58562	6.20011	7.12377	8.4924	4.61105	7.65458	8.1213	10.9178	4.9222	7.54898	8.07592	8.35804	5.47813	9.23743	7.35473	10.2579
ENSMUSG00000035683	Melk	0.972119	4.13963	0.889383	1.22912	2.34446	2.24283	1.58403	1.64451	1.99537	2.10014	0.795982	1.35662	1.60274	3.20357	1.53864	3.3948
ENSMUSG00000055866	Per2	4.52017	2.76179	1.74776	1.34534	3.1504	2.22977	2.69661	1.30436	3.47719	1.3292	2.5991	1.90915	3.84004	3.0093	3.4284	2.10436
ENSMUSG00000101122	Gm17971	5.2667	13.7983	4.38312	5.52098	5.74601	7.98074	4.95931	7.14978	4.94936	7.79435	4.13124	5.14254	5.32199	8.01566	5.8828	10.4122
ENSMUSG00000014353	Tmem87b	10.2572	3.94243	10.4843	8.39697	9.66479	6.20476	9.81452	7.4198	9.7161	6.51291	11.3447	5.95932	10.8924	5.21376	10.4256	3.91035
ENSMUSG00000078616	Trim30c	1.55493	2.36366	3.6526	3.27236	1.2145	5.89055	3.17642	5.5312	2.12544	2.34856	2.97533	3.41493	2.28546	4.82175	3.25908	3.68469
ENSMUSG00000020315	Sptbn1	2.84814	1.01699	2.06416	1.41247	2.59075	1.00182	2.82734	1.10982	2.60673	0.901784	2.38947	1.07391	3.2995	1.70059	2.43694	1.60302
ENSMUSG00000043061	Tmem18	14.0102	6.55973	11.4656	9.29577	13.5707	6.98177	11.6122	7.42579	14.2471	9.59667	13.0093	7.69832	14.5724	6.79605	12.5202	8.29505
ENSMUSG00000063605	Ccdc102a	2.51573	3.80902	3.27618	1.61933	1.98026	3.67838	4.40784	4.48195	2.53005	3.66641	3.47357	3.48476	2.00695	8.04299	3.31817	7.78129
ENSMUSG00000029449	Rhof	0.12016	0.318173	0.020528	0.162222	0.062568	0.165527	0.152732	0.0610616	0.102654	0.266894	0.199933	0.334694	0.154536	2.33773	0.1314	3.3444
ENSMUSG00000039942	Ptger4	6.9041	7.99177	15.6508	9.44101	7.35177	8.84302	15.1951	9.10771	6.93972	5.77371	12.3468	6.24366	7.20162	8.54436	10.4693	6.82197
ENSMUSG00000071415	Rpl23	22.8502	40.4283	26.7506	34.7532	17.4437	35.3262	21.8171	36.7172	20.8089	38.9897	22.0691	38.9881	20.1192	32.9008	27.0463	33.3705
ENSMUSG00000026536	Mnda	10.8035	25.435	21.26	17.7474	11.0269	17.4298	17.3718	20.1934	10.0887	21.5152	12.6849	12.7313	10.9856	15.0491	18.7986	7.59975
ENSMUSG00000090582	Gm17024	0.956504	5.77842	4.13424	3.34228	0.913107	4.14117	1.91053	4.45562	2.33706	2.24353	2.80108	2.47981	3.09294	3.93308	2.30116	2.17594
ENSMUSG00000036611	Eepd1	6.65849	16.5674	10.3265	9.75693	8.9878	13.5615	13.1925	8.00434	8.37667	13.8195	13.7267	9.02787	7.27099	14.8204	9.43771	8.55092
ENSMUSG00000039662	Icmt	3.6299	1.02615	2.81487	1.67144	4.40458	1.24257	3.40681	2.5669	3.58585	1.60281	4.52255	1.97132	4.07679	3.20834	2.76189	2.1867
ENSMUSG00000029192	Tbc1d14	4.23102	2.84767	5.10387	3.70075	3.81693	1.91055	4.55674	3.75743	3.85041	2.1407	5.52895	2.66005	4.0268	2.34192	4.34848	1.94692
ENSMUSG00000030432	Rpl28	15.4282	27.3182	15.9386	22.2979	12.2606	23.431	13.7947	24.6835	14.119	26.0907	11.9383	25.4156	12.57	22.9104	19.9593	26.3384
ENSMUSG00000005686	Ampd3	3.86731	1.88754	3.67989	2.31413	3.7621	1.62833	4.23791	3.58012	3.21937	2.22939	4.9907	2.32206	4.01531	2.04775	4.04877	1.82123
ENSMUSG00000035021	Baz1a	4.78893	9.551	6.99543	8.78876	4.88668	10.7066	7.27456	8.31581	5.33993	8.47956	6.44492	7.74913	4.97746	9.89101	7.28547	11.9547
ENSMUSG00000015766	Eps8	11.6929	15.9828	23.4363	22.0084	11.647	18.8403	22.6411	21.5172	12.1558	15.9628	24.3962	21.2303	12.9342	18.914	18.6309	22.9916
ENSMUSG00000018899	Irf1	15.8329	28.3353	35.992	34.6483	19.6211	29.4678	38.6105	39.8739	18.4745	28.6405	27.943	26.0376	17.5238	24.5262	27.3558	21.7195
ENSMUSG00000037805	Rpl10a	7.56029	15.2114	8.85154	12.0732	7.29366	15.1538	8.32951	11.5715	7.68741	13.7415	7.43124	12.6334	7.33649	11.9998	10.9268	13.5551
ENSMUSG00000073702	Rpl31	9.88537	19.0963	12.3743	14.4021	9.68769	18.129	11.1189	14.2582	9.07369	17.0754	9.2569	16.6033	8.52894	14.7013	13.8598	15.1602
ENSMUSG00000058351	Smim4	5.06134	9.40349	5.01993	9.00659	3.93695	10.0942	4.77396	8.86317	4.44808	8.65639	3.94564	8.44972	4.59355	6.91978	6.62383	4.08676
ENSMUSG00000067274	Rplp0	85.5842	172.786	105.77	149.557	92.5992	167.707	110.383	142.967	96.5518	158.968	101.622	152.589	87.4964	145.802	122.722	146.015
ENSMUSG00000021281	Tnfaip2	15.325	10.8789	10.2537	6.98553	19.3668	13.4763	18.9681	6.06243	14.9575	11.1276	16.2792	9.932	16.379	16.9493	13.9249	12.5273
ENSMUSG00000024885	Aldh3b1	39.9107	75.5732	69.41	72.8937	40.323	60.2815	56.9784	75.8721	38.7824	67.8325	61.1495	75.4656	39.9375	68.611	63.1556	60.5775
ENSMUSG00000070565	Rasal2	1.27674	0.368134	1.63086	0.400898	1.15703	0.36299	1.40436	0.49333	1.45415	0.385258	1.15225	0.312008	1.2188	0.3464	1.29162	0.145
ENSMUSG00000024712	Rfk	34.1785	28.7534	56.8618	35.5745	39.6303	32.1343	51.2487	44.5969	37.2593	27.9646	54.1075	31.596	33.6746	29.6657	50.7736	26.8525
ENSMUSG00000053334	Ficd	3.90991	1.12757	3.52832	1.89378	3.47383	1.13132	3.05428	2.16396	3.01949	1.47551	4.28666	1.77918	3.20771	2.56861	3.37608	2.23833
ENSMUSG00000022807	Osbpl11	42.1008	23.0996	41.7522	36.0043	39.4735	22.2471	41.2959	32.4734	38.8075	20.1401	45.0355	25.1388	37.1741	24.7	34.6981	19.2536
ENSMUSG00000036534	Slc38a7	9.60257	5.79885	6.00699	4.58175	8.29505	5.2815	7.85713	4.25431	7.1971	4.50109	5.36098	5.3198	8.55637	3.60907	6.61773	3.11645
ENSMUSG00000034484	Snx2	472.064	501.521	928.504	765.547	464.221	452.256	764.674	667.022	511.507	515.115	760.903	527.049	459.972	376.125	814.263	308.165
ENSMUSG00000050188	Lsm10	12.3419	23.4554	17.7201	22.5201	12.1122	27.029	18.4312	25.5218	13.5493	22.8837	15.3585	20.7289	11.9469	18.1092	16.5341	15.5251
ENSMUSG00000002068	Ccne1	0.334271	1.23207	1.02078	0.778688	0.824355	1.41707	1.14061	1.63497	0.575904	1.96012	0.662795	1.87112	0.365928	2.18671	1.11693	1.90108
ENSMUSG00000029428	Stx2	14.131	7.74156	12.0299	8.66042	16.893	7.25033	9.22621	10.0502	12.1082	7.40048	11.5033	7.42711	14.197	8.28498	9.54078	6.21687
ENSMUSG00000055116	Arntl	2.06468	1.37962	3.97413	2.59778	2.84619	2.27645	4.08554	2.54082	2.85973	2.38677	5.08326	2.97784	2.80257	1.61992	3.48292	1.43858
ENSMUSG00000100680	1810044D09Rik	0.748671	0.807654	1.64142	1.09002	0.952938	2.16091	1.99387	4.64998	0.938079	2.68285	0.91352	1.47045	0.504353	1.16609	0.50032	1.41929
ENSMUSG00000020649	Rrm2	7.17834	8.72267	3.5605	6.78361	11.9221	15.7415	5.6766	6.91144	8.42599	11.1361	3.17471	12.7675	8.08963	19.5266	17.0396	18.136
ENSMUSG00000026342	Slc35f5	44.583	23.3325	35.1353	26.9509	44.7825	37.0925	45.2021	25.6406	45.7457	30.238	42.8492	24.9324	43.7409	26.849	40.4078	21.9814
ENSMUSG00000026544	Dusp23	5.07503	8.53708	8.00153	11.121	3.44883	7.26202	6.09933	10.8988	6.22425	6.97747	8.58028	10.2381	4.78062	6.27011	9.05367	5.29968
ENSMUSG00000038456	Dennd2a	1.93881	1.43563	1.32588	1.32287	2.14654	0.856789	1.67278	0.812295	1.99448	0.79605	1.93177	0.811165	2.72428	0.814809	1.932	0.304478
ENSMUSG00000020572	Nampt	32.355	22.761	19.0228	18.0118	25.8963	15.8211	22.9362	15.9042	30.4055	23.3573	22.6281	17.1626	31.4278	21.7615	23.8771	15.1952
ENSMUSG00000037936	Scarb1	4.84804	7.51709	3.15587	5.54279	4.7369	6.61269	3.53646	4.62994	3.95608	5.94856	3.67171	4.56694	4.84518	6.79597	3.12304	5.64692
ENSMUSG00000057278	Snrpg	10.0552	14.7731	8.6382	12.7575	6.94783	14.3558	7.55553	14.4087	7.46945	17.5951	7.93118	13.2601	7.83828	13.3794	11.1354	13.7519
ENSMUSG00000061787	Rps17	21.1002	35.5664	24.5115	33.5887	17.3103	35.0156	20.5378	35.5916	19.8288	37.3361	20.2902	35.744	19.3227	32.043	29.3307	27.6566
ENSMUSG00000020143	Dock2	14.0657	10.5387	6.39729	10.6487	12.1164	10.6952	7.51476	9.06147	12.1886	7.63061	7.84945	12.6522	15.018	17.7246	7.17306	21.7666
ENSMUSG00000049643	2310022A10Rik	5.01845	9.32181	5.52735	9.48403	4.5581	7.60215	6.5277	10.3623	5.89247	9.71174	8.16122	12.3893	5.9443	9.47296	7.87346	8.61062
ENSMUSG00000030374	Strn4	4.9253	2.77248	5.57549	3.01806	6.11177	3.17607	7.48559	2.85502	5.22161	3.12213	7.87148	3.97936	4.6154	4.29882	5.71333	5.19893
ENSMUSG00000042462	Dctpp1	10.9443	22.2583	12.9808	22.2558	16.6137	30.1	13.7971	14.2079	12.6453	19.6386	11.3291	19.2402	11.4218	22.1323	16.7259	18.1967
ENSMUSG00000055538	Zcchc24	19.0915	13.1596	22.1177	21.8497	24.3414	11.7483	27.8218	17.0937	20.6827	13.2216	29.9305	15.5887	27.341	19.4854	24.8001	10.2342
ENSMUSG00000032046	Abhd12	87.1973	65.3406	64.0168	54.6458	85.1793	55.7807	58.2129	55.9079	85.5377	58.9789	52.5344	45.7874	79.6239	47.6255	52.3239	33.3285
ENSMUSG00000025025	Mxi1	6.26846	5.17427	4.50677	3.14424	6.56317	4.28099	4.37012	2.52439	6.08078	4.88519	5.00374	3.6411	9.46462	6.96922	5.61066	5.05236
ENSMUSG00000020334	Slc22a4	0.345836	1.45502	0.552421	0.966754	0.462204	1.2727	0.27631	1.25657	0.552496	1.31816	0.348138	2.16001	1.01345	1.71293	0.693344	1.96685
ENSMUSG00000026712	Mrc1	169.42	210.525	314.813	296.043	159.712	191.207	315.732	291.269	181.722	197.014	329.19	208.14	193.017	202.278	284.008	149.947
ENSMUSG00000028893	Sesn2	2.75726	5.04534	2.29562	3.04893	2.66548	2.34217	3.69482	5.17011	2.62392	3.92267	4.18418	4.64771	3.49158	8.44782	4.86311	10.5203
ENSMUSG00000098178	Gm42418	2.78206	2.85833	1.12032	3.47188	1.26469	2.15087	1.45538	2.77704	1.24497	2.97789	0.909279	2.41985	1.40563	2.78563	1.59359	3.32769
ENSMUSG00000000901	Mmp11	1.17325	0.045203	0.590575	0.18302	0.960017	0	0.648636	0.487971	0.945047	0.102378	0.786094	0.296274	0.846832	0.352426	0.630046	0.0595763
ENSMUSG00000022799	Arhgap31	11.8689	5.71514	8.98756	8.05857	10.4674	6.89149	12.8632	9.36414	11.1446	5.10156	13.5127	7.52611	14.5376	7.83063	10.8258	6.86439
ENSMUSG00000004880	Lbr	6.06553	12.2741	11.8013	13.0481	7.5014	13.6645	12.3229	13.4195	8.50736	12.8713	13.4551	11.9846	9.0035	17.8064	17.9802	19.2917
ENSMUSG00000036622	Atp13a2	27.1694	12.5551	18.6432	18.2354	26.7327	13.7726	24.3193	19.7159	27.1105	16.2291	24.4071	17.334	32.2905	20.0897	20.9369	14.9999
ENSMUSG00000038615	Nfe2l1	4.80457	2.05293	4.15684	2.53829	5.114	1.84271	4.96183	2.47829	4.54583	1.90382	4.85003	3.00458	4.62342	3.31971	3.84802	3.74337
ENSMUSG00000020271	Fbxw11	12.1409	8.45358	9.47061	6.03667	14.5787	9.04989	11.5341	7.73631	13.0059	7.99424	13.6175	7.31115	12.6734	9.91885	7.9604	6.96632
ENSMUSG00000059486	Kbtbd2	19.7241	12.8731	20.6287	11.5249	20.5988	10.3766	18.6717	10.9689	22.6048	14.3796	23.1262	11.6731	20.5165	14.5893	17.9863	11.5306
ENSMUSG00000020018	Snrpf	14.6499	24.9219	18.3979	17.843	12.5061	23.9375	12.38	18.6356	11.252	22.9907	11.2153	23.4062	12.3839	20.5362	17.5095	18.0255
ENSMUSG00000002944	Cd36	110.377	105.221	193.286	193.04	96.1084	102.364	173.483	162.869	128.645	125.197	201.276	153.533	119.076	78.4668	158.214	69.4993
ENSMUSG00000056153	Socs6	7.0856	2.98254	3.45135	3.92638	6.56807	2.77016	3.15559	3.88571	5.80498	3.29644	3.81686	6.23689	6.17818	3.80915	2.87435	7.18047
ENSMUSG00000047675	Rps8	14.2474	28.4179	16.0645	26.4809	14.0929	27.0359	14.7133	21.9719	15.5254	24.5598	13.5377	25.1489	14.2132	25.0995	21.8481	25.2567
ENSMUSG00000070705	Eid2b	3.60183	1.04612	4.03518	1.21017	2.31432	0.749715	2.35199	1.35516	3.64517	2.23392	2.34536	2.12228	2.93971	1.35935	3.19393	1.24745
ENSMUSG00000027227	Sord	50.4321	38.5511	64.1032	42.4341	50.6546	30.3629	62.0057	39.3944	50.6401	34.4209	54.6941	30.5057	48.4604	27.1313	50.8125	17.7429
ENSMUSG00000005057	Sh2b2	4.88011	5.00201	2.12691	3.45513	5.42547	4.46541	2.64959	3.20866	4.79191	5.11431	2.68405	3.59971	5.68149	7.32427	3.2816	3.67981
ENSMUSG00000097318	1700007L15Rik	1.64565	6.03604	2.31943	2.87518	2.19939	5.52174	3.12269	1.99312	2.16509	3.5383	2.40961	3.1029	1.99551	1.99929	3.46423	2.18382
ENSMUSG00000087545	Gm13966	2.18662	1.10082	1.5067	1.40078	1.94825	1.26226	1.45586	0.814865	2.87681	0.997273	2.26788	1.20251	2.50419	0.817386	1.75353	0.276352
ENSMUSG00000026395	Ptprc	11.1201	15.0265	9.53171	12.998	9.57367	15.9937	9.09554	12.8574	10.0398	14.526	8.90444	14.8106	10.6854	19.6622	8.61127	25.843
ENSMUSG00000035164	Zc3h12c	0.470205	1.86668	1.27242	1.29799	0.493759	1.48609	1.55906	1.14773	0.636296	1.49809	1.14461	1.39636	0.570169	1.98618	0.970963	1.79169
ENSMUSG00000063873	Slc24a3	0.741665	0.0484907	0.739117	0.0392663	0.858201	0.194608	0.650921	0.0628155	0.644174	0.109824	0.750715	0.105941	1.23773	0.252039	0.720928	0.0532578
ENSMUSG00000029684	Wasl	5.96005	4.82656	7.04195	4.51512	5.87468	4.99995	9.56567	5.08618	6.90629	4.18315	8.17405	3.76876	5.72883	3.78871	7.01068	3.01606
ENSMUSG00000022945	Chaf1b	1.0287	3.49363	1.33651	1.61976	1.80644	3.39528	1.17957	1.65646	1.63506	1.87419	1.12736	1.34696	1.57849	3.14515	1.42583	1.85384
ENSMUSG00000022574	Naprt	4.36368	4.98438	9.7681	7.67999	4.96209	5.13987	8.58788	6.87533	5.06563	3.76295	7.34078	3.6299	5.96578	4.61773	9.77769	2.49389
ENSMUSG00000024962	Vegfb	5.06224	2.93363	5.14968	3.28924	5.47159	4.07546	4.63786	4.40441	6.09395	3.271	4.67096	2.61302	6.55276	2.61955	4.6551	1.18968
ENSMUSG00000027656	Wisp2	0.416309	0.848314	0.782342	0.808163	0.485737	1.502	1.3859	3.05973	0.999795	0.497278	1.01595	2.34396	1.12181	1.81558	3.06031	2.10457
ENSMUSG00000034361	Cpne2	6.71106	9.69046	9.53207	12.7704	6.72112	9.45991	8.03591	11.3253	6.81187	9.93142	9.52182	11.7505	7.71024	12.7217	10.0648	16.1743
ENSMUSG00000036644	Tbc1d9b	12.5464	6.33196	11.1105	8.28021	13.7814	7.21653	14.3987	10.3615	11.3798	6.30258	14.011	6.96169	14.2904	8.09475	9.8538	5.43753
ENSMUSG00000028792	Ak2	10.5247	21.2209	10.1835	13.9826	12.8879	21.0203	10.1982	14.4453	9.74335	19.929	11.1795	18.4934	12.2178	20.3739	17.5836	17.6363
ENSMUSG00000079481	Nhsl2	0.981268	1.69977	1.51738	2.53242	0.818985	1.67508	2.27359	2.71647	1.01699	1.28781	1.92428	1.8568	1.21821	1.52488	2.50687	2.97637
ENSMUSG00000001029	Icam2	0.550512	1.41047	0.743577	1.17222	0.16423	1.75033	0.755973	1.37837	0.388005	1.00879	0.472309	0.729841	0.312914	1.31833	0.379392	0.684882
ENSMUSG00000000958	Slc7a7	10.358	7.6454	5.80539	6.53118	10.6687	7.31959	4.8871	5.69568	9.0264	5.83531	5.78483	5.21599	9.98143	4.8278	4.65805	3.72791
ENSMUSG00000032336	Nptn	38.2633	25.6447	28.9753	20.3728	35.1654	22.1623	29.4101	18.2926	34.6594	23.1959	27.5266	22.1739	35.0458	19.7947	24.1154	19.1663
ENSMUSG00000027219	Slc28a2	5.08916	6.98223	9.99033	11.2988	5.82589	5.50836	11.1142	9.81706	5.21909	6.33579	9.94267	7.77658	5.60136	5.38748	10.023	5.31427
ENSMUSG00000017119	Nbr1	4.2067	2.05828	4.53048	3.10503	4.26821	2.14598	5.0306	2.14697	4.11794	2.03317	4.92523	2.08589	4.36991	2.75513	4.26008	1.88204
ENSMUSG00000033323	Ctdp1	18.2979	15.0078	23.1461	16.2167	25.1866	17.7911	31.6812	18.3268	23.8362	14.0941	33.5512	14.8279	24.9369	18.1144	23.8714	13.0396
ENSMUSG00000066278	Vps37b	7.77956	13.9645	6.71065	10.3054	8.64408	13.7004	11.7816	13.6639	8.0299	11.0307	11.2627	11.7603	6.54028	17.6691	9.23659	21.5177
ENSMUSG00000046314	Stxbp6	9.77554	13.3884	18.5463	14.2722	7.64414	8.4094	15.6036	13.4789	10.9759	12.8436	17.9387	13.1828	9.89533	12.7103	17.9282	12.4728
ENSMUSG00000054203	Ifi205	0.22336	0.481915	0.606301	0.49864	0.142151	1.02076	0.545284	0.739887	0.536415	2.18293	0.295254	0.731161	0.351097	1.50755	0.646823	0.940964
ENSMUSG00000035004	Igsf6	65.9677	117.425	88.13	112.185	61.3245	123.67	73.4005	112.735	73.2594	127.362	74.6075	99.8848	70.6609	109.175	98.6597	98.9469
ENSMUSG00000006344	Ggt5	0.86304	1.36684	2.60532	1.86075	0.753766	2.82226	2.51241	3.26752	0.724757	0.915243	2.03332	1.73114	1.18754	1.45863	2.02476	0.74843
ENSMUSG00000054720	Lrrc8c	5.14842	8.36828	6.89967	8.71765	4.16378	7.66406	6.87864	7.63842	5.68132	8.98406	6.7452	7.77504	5.83011	12.7701	6.58598	15.3074
ENSMUSG00000097221	1810049J17Rik	2.10017	0.84961	2.96003	1.60531	2.75671	1.98902	3.67053	1.95662	2.22032	1.28282	2.40244	0.618733	1.32638	0.981335	2.89471	3.23487
ENSMUSG00000029705	Cux1	4.12754	2.52668	2.92273	1.81092	4.21682	1.85906	3.09626	1.81839	4.08156	2.14445	3.15494	1.83038	4.1418	2.78018	2.8874	2.29796
ENSMUSG00000106847	NoGeneName	5.03107	2.99063	2.62895	3.69985	4.87632	3.55623	7.28047	5.21329	5.37921	1.98182	7.1881	3.5089	6.14734	3.43031	6.81865	4.57416
ENSMUSG00000078122	F630028O10Rik	4.34741	2.30153	3.21497	3.00655	3.24712	2.76667	2.4523	2.32515	3.4802	1.41626	2.98387	1.70773	3.53884	1.41069	8.15092	1.0302
ENSMUSG00000032122	Slc37a2	20.9582	17.7578	16.4516	15.9817	21.7997	16.718	16.287	13.1493	22.9984	15.9701	17.6014	12.2719	20.1303	13.6184	11.2375	6.01144
ENSMUSG00000048497	Mmgt2	2.27043	1.08638	2.18494	1.43954	2.517	1.56563	1.82862	0.682334	2.47775	1.50314	2.01074	1.01413	2.33126	1.11222	1.81706	0.642151
ENSMUSG00000090035	Galnt4	8.93727	3.80513	10.0323	8.74417	8.64554	7.19704	11.6391	9.17012	9.56337	5.14753	11.5595	6.74053	9.92215	6.68172	9.65169	7.43223
ENSMUSG00000026012	Cd28	1.44663	3.19827	2.58431	4.43084	1.68788	4.15611	2.46143	6.07319	2.1315	3.03707	1.76516	2.56768	1.17306	1.53551	1.32481	1.15115
ENSMUSG00000024097	Srsf7	38.3172	73.1418	56.5056	69.6417	38.0013	68.3736	52.4585	68.3223	38.9091	66.366	47.8744	61.7115	40.4941	66.8428	53.7738	65.8297
ENSMUSG00000029161	Cgref1	0.0542904	0.937081	0.357085	1.51764	0.310963	1.99792	0.37954	0.505795	0.153057	0.955055	0.5962	1.08763	0.877764	1.52208	0.380951	1.08067
ENSMUSG00000042331	Specc1	2.48601	1.50687	2.27536	1.13851	2.40299	1.52538	1.69187	0.739754	2.34989	1.27575	1.81852	1.06554	2.30837	1.34034	1.38978	0.823566
ENSMUSG00000061306	Slc38a10	9.9183	4.33083	5.99105	5.48149	10.1906	4.86687	8.34599	5.32061	9.04892	4.7336	9.66323	5.66234	9.92501	6.77381	7.80212	5.08436
ENSMUSG00000022769	Sdf2l1	71.5886	102.381	59.7576	104.42	69.9081	119.427	56.9562	89.437	69.6409	111.579	61.7071	104.358	66.6989	93.8057	74.2854	145.363
ENSMUSG00000018171	Vmp1	17.3773	32.6332	23.6722	27.7629	17.7786	32.2792	23.9161	28.6302	16.7652	33.6006	23.2511	24.6745	18.0994	26.4891	24.0586	23.1207
ENSMUSG00000026478	Lamc1	3.05887	2.18047	2.90463	1.57684	2.8685	1.59107	4.68491	2.14489	2.78314	1.62678	4.58966	1.88515	4.22689	2.42426	4.42062	2.31543
ENSMUSG00000021866	Anxa11	2.00097	2.14469	1.71033	2.684	2.34152	1.69072	4.71875	2.26109	2.53551	1.61493	5.12728	2.52538	3.37866	2.50938	5.2798	2.52073
ENSMUSG00000038900	Rpl12	3.82011	7.64418	4.57478	6.59572	4.11873	7.6696	4.17423	6.4341	4.11082	8.14036	3.63303	7.36174	3.90562	7.30802	5.25596	7.27035
ENSMUSG00000035235	Trim13	2.33675	6.30211	5.09957	3.95091	2.6265	3.91622	3.08653	3.01974	2.26678	4.45696	3.8975	3.90851	2.01851	4.40274	4.64701	2.89371
ENSMUSG00000060301	2610008E11Rik	3.29812	0.618775	3.39539	3.1066	2.13549	1.76937	3.75212	2.05736	2.82988	1.34537	2.20463	1.1491	3.21682	1.42049	2.58737	1.19611
ENSMUSG00000052155	Acvr2a	4.0032	2.30073	5.23979	2.56553	3.7882	4.04913	6.44221	3.51785	4.04126	3.5536	7.08702	2.92529	4.38085	4.78666	6.39607	3.74481
ENSMUSG00000039774	Galnt12	1.33371	2.09824	0.469943	0.825271	2.12201	1.5338	0.776992	0.647162	1.46224	1.0319	0.71198	0.327439	1.54426	2.72649	0.58491	2.15966
ENSMUSG00000062373	Tmem65	40.5253	36.5249	28.4067	28.1629	45.2684	24.4893	34.0398	27.6832	47.7564	30.2106	36.494	25.0991	52.3659	30.0376	32.3169	24.1768
ENSMUSG00000051285	Pcmtd1	5.504	2.48313	4.82013	3.20726	4.11626	1.96978	4.14165	2.32168	4.73736	2.55323	4.9441	2.64528	4.96588	2.39998	3.39429	2.96917
ENSMUSG00000037344	Slc12a9	6.39067	4.23437	6.93145	3.4461	7.3623	2.34839	8.47046	4.64915	6.67289	4.39511	9.29602	4.74177	7.21515	5.51145	6.93996	5.72101
ENSMUSG00000034379	Wdr5b	2.17551	0.806749	2.87458	3.56335	2.14171	1.03019	2.17269	2.47017	1.53332	0.863749	1.55539	1.84267	2.12965	1.01654	1.77187	1.54658
ENSMUSG00000020057	Dram1	6.26736	5.57188	6.65621	5.01128	5.69068	8.50713	7.72721	4.37447	6.98325	6.28478	8.7434	4.28229	6.62196	5.20838	7.85825	2.45754
ENSMUSG00000070583	Fv1	0.439437	0.758493	1.40387	2.22649	0.5873	0.28538	1.3166	1.55572	0.247775	0	1.3673	0.414282	0.62167	0.246401	0.969099	0.999672
ENSMUSG00000036832	Lpar3	1.32901	0	1.80377	0	2.6784	0.426218	2.26131	0.183433	2.72915	1.6356	2.34238	1.56617	2.03931	1.288	1.23354	1.7263
ENSMUSG00000060938	Rpl26	16.266	31.1487	17.6198	27.2089	13.7311	27.1391	14.4715	24.2864	15.8199	27.1775	14.6907	26.451	14.9294	23.0671	19.3314	26.8302
ENSMUSG00000026675	Hsd17b7	2.74723	1.52568	2.64245	1.64726	2.59156	1.12607	1.99687	0.666366	2.88722	1.52515	2.43973	1.34096	3.43313	1.82299	2.62351	1.35594
ENSMUSG00000106106	NoGeneName	181.004	381.953	257.847	428.679	176.542	422.149	221.035	404.629	325.387	408.599	191.152	340.505	163.203	260.475	304.3	229.162
ENSMUSG00000097334	2700012I20Rik	1.95048	1.72158	1.16627	3.56265	1.69272	0.383845	0.531261	2.97354	1.66632	0.519882	1.46043	1.04479	1.79178	0.331416	1.59971	0.504221
ENSMUSG00000074419	Gm15448	0.203583	0.878489	0.669516	1.10041	0.25508	1.0329	0.495591	0.877213	0.203273	1.03213	0.640432	0.959646	0.25715	1.22476	0.43366	1.60407
ENSMUSG00000027995	Tlr2	471.175	604.929	335.267	350.437	546.257	635.73	428.206	365.152	478.293	622.908	349.329	358.172	461.035	615.12	313.222	362.738
ENSMUSG00000046152	Fut10	1.81405	0.194672	1.07982	0.356763	1.44161	0.400918	1.48919	1.25648	1.10674	0.501236	1.18207	0.481274	1.28604	0.461543	1.08535	0.450127
ENSMUSG00000109904	NoGeneName	1.24679	0.448338	0.520668	0.544576	0.925727	0	0.345881	0	2.08295	0.676945	1.14099	0.897887	1.53985	0.517849	1.73583	1.05048
ENSMUSG00000035673	Sbno2	39.424	49.2778	62.0626	60.3067	46.9209	53.6032	107.086	81.6918	43.358	45.6522	87.4655	63.7036	53.2331	84.8406	63.8233	91.7088
ENSMUSG00000032840	2410131K14Rik	3.69286	2.43197	3.65144	1.96933	4.73458	2.37034	3.30211	2.24029	3.95458	2.49698	3.34019	1.69519	3.94858	2.30742	3.07765	1.81123
ENSMUSG00000027765	P2ry1	0.0749983	0.849523	0.105705	0.97182	0.107393	0.838818	0.237187	0.710365	0.152705	0.916209	0.057195	1.17842	0.113678	0.642475	0.0877094	0.853065
ENSMUSG00000029309	Sparcl1	1.10614	4.0361	2.04812	4.29144	1.11807	2.64099	2.89172	3.72809	1.80381	2.0349	1.75659	4.1406	2.893	5.13819	4.33741	2.77538
ENSMUSG00000028962	Slc4a2	2.86329	1.11372	2.38491	1.18586	3.29421	1.56809	3.34377	1.06278	2.69076	1.57754	3.99832	1.59973	2.68585	2.36134	2.56146	1.54624
ENSMUSG00000026411	Tmem9	2.63612	1.68615	3.72637	2.22131	2.33836	2.14625	3.58793	2.19512	2.93765	1.93793	3.33042	1.62199	2.68736	1.22087	3.90527	0.663372
ENSMUSG00000041126	H2afv	19.1621	34.1084	21.9767	26.8814	22.5431	37.8819	22.1204	28.4587	16.4715	32.1119	18.2065	25.5702	19.648	33.7083	28.2476	26.9243
ENSMUSG00000051238	Swsap1	3.43134	0.854233	3.72017	1.09524	2.58273	1.78557	3.03148	1.53692	2.35643	1.03184	1.81163	0.699862	2.26712	0.801673	2.1167	1.1884
ENSMUSG00000031016	Wee1	10.0391	6.54391	11.6994	7.22036	11.0398	7.87113	11.3015	4.79211	14.4679	9.77663	14.3813	8.56978	15.0912	11.9345	18.2064	9.81837
ENSMUSG00000040957	Cables1	3.69904	2.94862	8.56079	5.20519	5.723	6.52825	7.86164	5.16081	4.57208	3.68635	7.32058	3.39281	4.32709	2.91194	5.91815	1.67538
ENSMUSG00000033386	Frrs1	6.42725	8.82461	4.51412	4.64105	6.12532	6.68731	3.22027	5.11091	6.34503	7.25432	3.55485	6.27355	6.21044	6.44128	3.88303	5.44607
ENSMUSG00000052085	Dock8	27.2386	23.521	13.5119	15.5195	27.426	20.456	18.5801	13.6867	26.0059	16.0877	13.2452	14.8966	24.6999	18.9391	13.8079	27.8648
ENSMUSG00000022148	Fyb	22.4612	27.5521	16.9581	21.4762	19.6324	24.5905	11.5872	18.9196	20.0817	20.7511	12.2693	14.6198	18.4978	21.997	12.284	11.2993
ENSMUSG00000022180	Slc7a8	69.7695	49.0204	45.4093	43.163	74.9583	42.6408	54.6621	49.5629	67.572	48.436	61.7849	38.8771	68.1924	55.0842	50.4037	28.705
ENSMUSG00000030559	Rab38	0.337527	1.45647	1.58573	1.37598	0.107404	1.82665	0.786542	1.93915	0.687243	1.37445	1.64739	1.32586	0.56845	1.20915	1.12781	0.693187
ENSMUSG00000021257	Angel1	1.24793	1.34625	1.54645	0.205391	1.57115	0.469818	1.86044	0.72454	1.03677	0.477243	1.63857	0.618087	1.33414	0.523959	1.17843	0.360007
ENSMUSG00000078974	Sec61g	3.84889	6.73512	3.88982	7.19367	3.93061	6.87862	4.11208	7.48433	3.9324	8.06987	4.05471	8.6231	3.30137	7.21472	6.39293	5.23906
ENSMUSG00000025151	Maged1	7.83455	5.31703	8.84218	5.00852	9.37821	4.71777	7.54536	5.63307	7.24695	3.73556	8.14137	4.59654	8.05232	3.33181	6.173	2.998
ENSMUSG00000001630	Stk38l	6.57133	3.41793	2.851	2.41628	6.48123	3.66518	4.1185	2.06155	5.78154	3.06367	4.58698	2.72619	5.84415	4.07319	3.04155	5.37074
ENSMUSG00000000753	Serpinf1	3.09437	5.58993	4.23226	7.64556	3.61819	9.73068	5.92472	13.3226	4.45651	9.28723	3.66959	8.00514	8.73298	11.8751	9.65428	8.38267
ENSMUSG00000028936	Rpl22	3.20224	5.30773	3.80811	5.72586	2.59522	5.43369	3.01486	3.90011	3.07198	6.60147	3.20523	5.7391	2.54486	5.31496	4.14622	5.21694
ENSMUSG00000059070	Rpl18	10.1665	18.3201	13.0092	15.1713	9.14713	16.7914	10.5093	13.842	8.8973	15.7329	9.08193	15.7445	8.5874	15.6971	12.2493	13.9885
ENSMUSG00000021701	Plk2	48.8255	45.4811	108.145	102.471	47.602	53.8312	82.3511	89.323	47.958	63.7506	81.6798	74.6772	57.9547	52.7079	80.5746	56.0452
ENSMUSG00000052724	Gm9888	0.628418	3.79639	0.826662	1.09793	1.07983	2.17658	1.00417	1.6393	0.944884	0.614161	0.69011	1.62922	0.762018	2.23165	2.39376	1.31045
ENSMUSG00000108624	NoGeneName	2.40644	4.93246	2.03502	2.94306	2.29726	0.781399	1.20166	0.448391	1.13072	3.52777	1.32134	0.567172	1.45902	0.899557	2.41226	0.2281
ENSMUSG00000021482	Aaed1	39.5548	26.7872	52.2908	29.3216	32.519	24.3102	49.8467	32.0849	37.4059	27.804	45.9044	30.1441	34.5482	29.5022	42.0269	28.6223
ENSMUSG00000036817	Sun1	2.43409	1.19399	2.99636	1.90407	2.97541	1.11075	3.43465	2.64698	2.66999	1.58315	3.57027	1.89897	2.83673	1.76747	2.66527	1.8731
ENSMUSG00000071176	Arhgef10	0.403592	0.653083	1.34724	1.0948	0.309239	0.551793	1.78199	1.71676	0.414206	0.602033	1.36074	1.05761	0.423927	0.491312	1.09127	0.583897
ENSMUSG00000028609	Magoh	19.3023	33.5173	21.6284	27.3216	17.5397	31.506	21.7514	28.0803	19.2063	34.7024	19.7425	28.3422	16.4801	28.3602	33.214	36.6901
ENSMUSG00000004837	Grap	22.1717	17.1558	35.5896	27.9575	21.7327	21.0697	33.8735	34.4271	19.9676	16.703	28.7446	25.2728	20.8708	15.9718	27.054	16.7627
ENSMUSG00000109559	NoGeneName	1.09007	0	0.808618	0.501184	1.47877	0.620979	0.286489	1.76387	1.40179	0.784987	0.525036	0.0676099	1.44936	0.053616	0.575108	0.0543814
ENSMUSG00000063849	Ppcdc	2.9607	2.89183	1.2857	1.74755	2.69651	2.78885	1.28664	1.31207	2.45143	2.01765	0.981264	1.43333	2.57131	1.6676	0.954527	1.00877
ENSMUSG00000037049	Smpd1	13.9303	6.75017	13.6041	11.4708	14.9551	8.1568	12.3385	7.76558	13.3913	8.23549	15.047	9.7689	13.7996	7.68291	11.3314	6.79687
ENSMUSG00000041538	H2-Ob	1.54325	1.60466	1.04824	1.08825	1.68623	1.97224	0.575648	1.16061	1.31048	1.12664	0.442405	1.18321	1.01458	2.13726	0.633703	4.12405
ENSMUSG00000025921	Rdh10	1.88072	1.76938	3.30829	1.91039	2.33819	1.91729	4.30258	1.22244	3.22653	2.30825	4.14271	1.93284	2.36453	1.92109	2.74021	1.65831
ENSMUSG00000020629	Adi1	13.9191	8.8877	12.9726	6.47401	12.9285	7.00351	9.88106	9.67323	11.9845	7.97818	9.9494	7.75815	14.1413	6.25784	11.2754	5.13479
ENSMUSG00000015354	Pcolce2	2.39646	0.284379	0.630491	0.565235	2.42499	1.06348	1.17274	1.47355	1.73408	0.889993	0.811446	1.83566	3.63242	1.99321	2.04191	1.54464
ENSMUSG00000032754	Slc8b1	12.6128	7.09805	10.2905	6.3469	12.8999	5.64861	10.5631	6.77887	10.8156	6.82837	11.0522	7.42545	11.6191	7.88142	9.74298	5.58661
ENSMUSG00000035493	Tgfbi	1269.87	730.808	1025.31	713.047	1221.37	662.405	980.373	792.607	1167.73	742.757	1031.22	685.923	1257.8	862.948	955.553	659.295
ENSMUSG00000024621	Csf1r	556.741	372.934	584.778	369.843	696.11	442.362	661.036	476.644	561.133	342.115	631.937	343.252	566.975	364.934	424.721	190.142
ENSMUSG00000041920	Slc16a6	10.7822	10.9212	6.04416	6.95721	10.717	6.61431	6.82193	7.07732	10.003	7.25957	5.8727	5.88386	10.7406	6.72709	5.95684	2.91797
ENSMUSG00000032667	Pon2	45.8378	22.3881	36.3377	22.911	44.1971	25.0155	34.119	25.0423	41.5145	27.4441	36.2871	29.3162	42.1817	24.3019	35.1678	23.1162
ENSMUSG00000025059	Gk	1.52069	0.980664	0.358534	0.5098	1.48919	0.789569	0.35306	0.104557	1.29195	0.861001	0.451899	0.436439	1.68975	1.2271	0.63562	0.792514
ENSMUSG00000037418	Best1	1.06971	2.69263	1.57947	2.09142	1.31294	2.86699	1.88228	1.66099	1.2446	2.93719	2.0511	1.08051	0.926519	2.23737	1.53185	1.4485
ENSMUSG00000042444	Fam63b	13.0091	7.75677	13.0428	9.16507	13.5598	7.06156	12.1607	8.18642	13.5785	7.54414	12.1741	8.36946	13.3932	7.05827	11.2239	7.32617
ENSMUSG00000027286	Lrrc57	6.96009	3.99906	6.08962	3.57977	6.00636	3.54834	5.40219	3.12471	6.36297	3.99259	5.74637	3.71471	6.16675	2.83979	6.59774	2.71301
ENSMUSG00000024659	Anxa1	213.911	253.212	332.258	300.254	200.701	266.294	316.717	238.26	252.234	344.963	360.641	426.681	212.15	290.473	506.503	382.266
ENSMUSG00000003970	Rpl8	144.219	265.323	175.172	232.058	156.077	270.469	173.401	227.693	145.842	251.229	155.415	248.713	145.449	234.052	211.703	236.726
ENSMUSG00000022218	Tgm1	0.302995	0.342432	0.826985	1.2226	0.261701	1.03071	1.25364	1.68027	0.122031	0.606343	1.14875	0.884156	0.379075	0.997796	0.983499	0.929983
ENSMUSG00000092074	Dynlt1a	3.26913	10.9327	7.52574	9.9953	3.74497	8.49219	6.69303	10.8121	4.76183	7.50815	6.43219	5.77873	4.95517	4.73541	6.06251	4.64807
ENSMUSG00000031029	Eif3f	14.4199	24.387	18.8916	17.9227	12.9482	24.6905	16.2484	28.5598	14.3879	24.0346	17.0203	26.2363	13.8098	22.0543	18.2659	25.7456
ENSMUSG00000045822	Zswim3	1.88108	1.83601	3.57707	1.99537	2.65084	2.56927	2.7285	1.54387	2.44115	2.40743	4.13968	1.47783	2.3534	1.88349	3.54677	1.4434
ENSMUSG00000030657	Xylt1	0.911686	2.16373	0.790009	0.902608	0.967026	2.32442	0.950972	0.84937	0.980505	1.5642	0.825052	1.40862	1.27952	2.3572	0.649877	3.12058
ENSMUSG00000046727	Cystm1	0.909321	0.0676525	0.972265	0.109566	0.688466	0.339387	0.438414	0.43819	0.648264	0.153223	0.946938	0.406463	0.950552	0.0879092	1.63445	0.326935
ENSMUSG00000045730	Adrb2	86.3651	50.4921	107.846	72.3804	85.3102	59.7874	81.2227	48.72	71.6941	43.7516	75.6697	50.0212	76.7488	42.1008	75.2273	42.4872
ENSMUSG00000048758	Rpl29	11.3177	23.3693	13.7729	17.1957	11.1138	21.0953	12.8253	20.0309	12.2205	20.8225	12.4941	17.6557	11.9281	17.6381	14.3033	19.0272
ENSMUSG00000037613	Tnfrsf23	1.81737	0.861782	2.30812	0.837413	1.50614	0.864647	1.79507	0.986121	1.95185	0.897829	1.90075	0.706046	1.61446	1.34378	2.32225	0.643623
ENSMUSG00000038518	Jarid2	1.6153	3.00403	1.49797	3.27001	1.50514	2.9418	2.10769	2.20827	1.58067	2.8004	2.20449	2.42909	1.81678	5.32281	2.22465	4.51342
ENSMUSG00000031792	Usb1	5.41047	8.03981	9.66913	12.233	5.87392	10.3056	8.37006	10.5014	6.03156	9.40903	7.96099	9.68893	5.52086	10.6578	9.06583	9.65352
ENSMUSG00000109429	NoGeneName	0.897006	3.64152	1.19772	1.69091	0.743637	2.06954	1.39092	1.23155	0.931689	1.13042	1.72818	1.16834	1.66973	3.309	1.08847	2.64024
ENSMUSG00000028756	Pink1	20.9315	15.863	26.1961	18.6095	29.9102	15.8211	28.7381	21.0274	25.4605	16.0151	33.0519	22.2205	22.8292	17.7234	27.2022	16.2782
ENSMUSG00000102748	Pcdhgb2	0.964783	0.246968	0.399487	0.228556	0.905401	0.194691	0.865546	0.50274	0.799081	0.0799063	0.763196	0.250513	1.22277	0.0764084	0.721238	0.0774992
ENSMUSG00000045573	Penk	0.335349	2.23091	0.420134	1.02532	0.213423	0.241982	1.28384	0.676926	0.525238	2.02107	0.409189	1.18557	1.18604	2.24599	1.45669	1.32445
ENSMUSG00000019539	Rcn3	6.46764	4.49289	10.4661	11.9847	5.73765	3.9775	9.21587	10.1187	5.44865	5.9059	7.0398	7.12134	6.04042	4.68579	8.84083	3.63805
ENSMUSG00000107362	NoGeneName	1.45375	6.19847	2.53681	2.17706	0.793027	3.44672	3.11115	1.74135	1.62638	1.28546	2.02726	2.28423	2.37841	2.65246	2.35939	3.74021
ENSMUSG00000015133	Lrrk1	5.1754	2.08625	1.70719	2.59119	4.6121	2.0336	3.93838	2.78912	3.44717	1.92365	3.53327	2.55473	5.71654	3.33801	3.16656	3.55527
ENSMUSG00000048490	Nrip1	4.87438	3.68763	3.92828	2.49481	4.90976	2.65147	3.97559	2.04354	3.99341	1.85666	3.64867	1.99574	5.24761	3.2646	3.24491	2.89064
ENSMUSG00000037731	Themis2	31.5521	44.3216	49.8927	70.9546	33.6554	38.3294	56.9248	56.2587	35.3886	32.7611	55.6946	54.3579	32.9581	40.6405	45.3301	50.331
ENSMUSG00000018042	Cyb5r3	105.486	63.9302	119.38	63.6782	106.67	66.7257	105.416	62.9509	96.2021	66.6627	130.122	81.4756	110.947	71.2196	108.465	64.487
ENSMUSG00000026880	Stom	197.776	98.4591	132.898	104.193	204.358	114.103	130.055	127.223	169.803	108.217	137.284	113.969	182.987	117.814	121.446	105.395
ENSMUSG00000032301	Psma4	23.3727	31.2009	28.2144	38.3609	22.1584	26.4444	22.6525	32.2658	25.7513	35.4901	25.6883	41.6815	22.6407	30.8808	29.3846	51.5988
ENSMUSG00000001552	Jup	5.8877	5.89408	6.59785	8.15002	8.15313	7.00247	11.8685	12.2477	6.84898	5.96617	10.7852	13.3072	6.57734	11.1059	9.10499	16.2469
ENSMUSG00000091264	Smim13	10.9221	8.29474	9.19042	7.16778	11.49	6.58728	12.8888	7.74559	11.5662	7.7004	12.3574	6.17943	14.5785	8.2266	12.8822	5.56269
ENSMUSG00000034488	Edil3	0.930189	0.275146	1.30633	0.139799	0.720892	0.189453	0.884033	0.167731	0.850642	0.21994	1.18535	0.400753	1.20274	0.191618	0.982568	0.237016
ENSMUSG00000038178	Slc43a2	9.70358	4.72036	5.70795	4.86886	8.82313	5.30026	7.89897	6.27125	8.87866	4.33024	8.36642	4.92608	11.1172	7.3633	6.87826	4.74615
ENSMUSG00000032741	Tpcn1	4.91757	2.78356	3.32686	2.65836	3.67825	1.97877	2.72716	1.99428	3.95797	2.10333	3.25079	2.1135	3.96366	2.14102	3.18965	1.20644
ENSMUSG00000039230	Tbcd	4.54785	2.61104	3.80383	2.57332	5.41867	2.27478	5.30755	3.00923	4.50046	1.86036	4.72158	3.10601	4.96985	2.93	3.7904	3.1841
ENSMUSG00000032333	Stoml1	5.93744	5.35436	8.48462	7.68558	6.64226	4.11699	8.18429	8.61432	5.62327	4.35205	7.5278	5.68502	5.2498	3.5691	8.46271	3.16571
ENSMUSG00000094441	Zfp955a	0.888532	0.319512	1.66976	1.29365	1.34301	0.320574	2.1445	0.413899	1.18291	1.0131	1.69403	0.785315	1.57125	0.41518	0.89068	0.982584
ENSMUSG00000048445	Ccdc57	1.61339	0.504492	1.75764	0.939601	1.36162	1.99937	1.51789	0.108921	0.966834	0.662706	2.24681	0.799092	1.6067	1.17999	1.52353	0.598416
ENSMUSG00000067203	H2-K2	36.7669	58.2481	42.1515	41.0065	34.6573	78.2144	48.1508	48.257	29.2276	52.8822	41.9	45.2353	31.7786	40.4106	34.5378	36.823
ENSMUSG00000022560	Slc52a2	6.69312	2.90756	6.41559	3.8456	7.67592	3.54929	9.06213	4.56163	6.62753	4.69742	10.3593	6.77581	6.53642	6.25492	6.84438	7.23837
ENSMUSG00000032218	Ccnb2	10.2193	21.9633	7.96463	14.9479	17.6206	22.0364	18.1177	15.7203	10.0502	16.0263	7.97465	19.5113	13.3685	30.6496	22.1556	25.3803
ENSMUSG00000022885	St6gal1	13.6039	8.15317	11.5913	8.03337	15.7982	7.57863	13.411	10.0575	11.8678	7.3005	13.7614	6.47005	13.9438	8.88563	9.46268	6.00832
ENSMUSG00000067925	Cxx1a	5.07467	3.72264	4.19606	3.9011	5.61954	3.95473	6.99397	3.21491	4.10125	3.67006	7.98776	3.82734	5.12794	2.46607	7.32519	3.65571
ENSMUSG00000010051	Hyal1	1.508	1.78424	2.79961	1.40233	1.39315	1.32947	2.52627	2.03941	1.42856	1.11723	3.42783	1.01753	1.94166	0.863748	2.63319	0.541786
ENSMUSG00000074682	Zcchc3	0.0789357	1.23474	0.222508	0.999856	0	0.768939	0.157667	0.588322	0.370897	0.617158	0.505661	1.34881	0.199411	0.811446	0.356069	1.01008
ENSMUSG00000022351	Sqle	4.18599	2.83412	4.93702	1.7998	3.51738	1.78164	4.86644	1.57416	4.37426	2.01355	4.63883	2.32517	5.81615	3.39238	4.77526	3.88512
ENSMUSG00000042607	Asb4	0.602453	1.00442	0.926305	1.91375	0.627403	0	1.55888	2.37266	0.823493	0.802888	0.902175	1.45219	0.885493	0.665376	0.823512	1.32379
ENSMUSG00000006221	Hspb7	1.57683	0.0945034	0.823122	0.38263	0.794459	0.0474088	0.656162	0.204035	2.55202	1.02737	0.521092	0.722637	0.929474	0.654932	0.482974	0.456694
ENSMUSG00000064352	mt-Ts1	21.093	41.7171	24.7742	41.4588	25.17	32.3431	17.5547	34.3896	36.3404	89.3292	28.9546	64.2137	37.3002	39.4241	45.8119	39.9869
ENSMUSG00000020422	Tns3	4.84589	2.55034	4.00947	2.75073	4.10163	2.37832	6.06421	3.81096	4.47094	2.55013	5.63761	2.46227	5.2437	2.89686	4.82811	1.69226
ENSMUSG00000025986	Slc39a10	8.5274	4.04297	9.41596	7.63904	7.77756	4.83537	8.95031	6.13551	8.44744	5.32151	10.5873	5.31257	7.01154	5.4058	7.33659	6.4869
ENSMUSG00000015305	Sash1	3.55212	4.05057	3.13603	1.57233	2.54891	2.73517	2.17851	1.75461	2.7668	1.84061	1.76716	1.41874	3.31237	1.53725	2.05517	0.734403
ENSMUSG00000043415	Otud1	7.49464	5.12826	10.3418	6.54706	9.07613	5.79427	9.28131	4.62831	10.6249	5.31557	10.4643	6.40952	10.5161	4.20238	6.82587	3.77525
ENSMUSG00000049130	C5ar1	213.499	272.087	383.406	270.615	200.662	273.038	356.3	306.782	232.116	278.277	388.036	233.377	210.167	208.1	336.426	95.7246
ENSMUSG00000021176	Efcab11	0.52758	0.822097	1.54225	1.17779	1.06325	2.41104	2.9272	1.63839	0.771229	2.63534	1.55572	1.72701	0.770059	2.30085	1.82161	1.5558
ENSMUSG00000017404	Rpl19	77.8139	133.886	87.4916	115.989	70.397	121.893	84.9926	112.872	67.5714	132.138	75.5976	129.849	72.9242	107.269	96.1037	130.087
ENSMUSG00000106549	NoGeneName	0.128163	0.921733	0.361272	1.11959	0.244696	1.156	0.170662	0.835817	0.281027	0.668027	0.351861	0.604131	0.474863	0.718632	0.428242	2.18667
ENSMUSG00000048307	Ankrd46	18.3394	13.3478	21.3218	19.4384	17.7875	10.9572	20.5624	15.4912	17.9237	11.1364	19.6922	12.5061	18.9767	10.6946	19.9035	9.31751
ENSMUSG00000034932	Mrpl54	21.1767	40.3827	31.8569	40.1751	24.402	32.5294	25.315	41.5509	21.3078	39.6155	22.2181	41.3405	21.1828	32.2841	30.3408	29.9064
ENSMUSG00000074916	Chst14	6.62742	4.64881	7.5397	3.37504	5.84442	3.89225	5.69872	4.54083	5.72536	4.03727	6.14662	3.2571	6.5168	3.36061	6.22636	2.19727
ENSMUSG00000026548	Slamf9	84.7977	135.225	85.319	104.256	111.902	162.469	105.998	100.258	91.6674	156.539	82.6739	164.045	85.5011	147.788	83.6137	243.846
ENSMUSG00000054693	Adam10	35.4912	15.0223	21.4604	17.6906	31.6742	17.3196	18.0406	18.725	30.5559	18.6282	21.4207	19.1179	33.9755	24.6429	20.7856	23.184
ENSMUSG00000039997	Ifi203	2.07053	4.54139	3.12175	4.16197	1.65893	4.29923	3.32861	4.606	1.56853	2.91661	2.77457	2.38399	1.3984	2.47302	2.34027	1.85245
ENSMUSG00000062488	Ifit3b	1.1522	3.07474	1.42452	3.12553	0.926256	2.42859	1.69579	2.59887	1.4817	3.55599	0.388474	1.14342	0.980463	0.566721	0.486311	0.632293
ENSMUSG00000070348	Ccnd1	4.03404	6.71367	6.70472	4.74589	3.40592	7.5917	4.65641	5.87353	3.71476	5.21046	2.76415	3.48778	2.60151	6.7442	3.27161	8.60824
ENSMUSG00000061024	Rrs1	18.4177	11.6913	19.1976	8.53603	18.0344	13.7172	18.867	12.5243	14.9706	11.5176	20.7027	11.3058	14.3024	14.7768	18.9965	11.6197
ENSMUSG00000039787	Cercam	2.85099	0.705413	1.81866	0.913955	3.07121	1.55707	2.11588	1.36461	3.24454	1.15031	3.11172	1.41787	2.35231	2.56656	2.22862	1.41317
ENSMUSG00000029561	Oasl2	4.52585	9.57873	8.20956	10.15	4.23333	8.31452	5.48276	7.28906	3.73819	7.86451	5.22832	4.96275	4.25548	5.59514	5.08609	3.36653
ENSMUSG00000023249	Parp3	3.69413	1.94399	4.3854	2.55017	3.93939	1.58962	3.79733	3.25696	3.04818	1.73472	3.80942	2.39964	3.39604	1.70088	2.69149	1.68246
ENSMUSG00000008226	Scrn3	2.99524	1.061	3.09441	1.39288	2.91624	1.38711	2.29188	2.02693	2.89878	1.47092	2.98653	1.28194	3.23749	1.57365	2.44978	0.720368
ENSMUSG00000036620	Mgat4b	19.882	12.9188	16.908	12.5132	24.5459	14.3692	22.0137	13.6969	23.6901	13.7943	24.9508	15.8424	24.6048	15.4641	18.8579	10.7547
ENSMUSG00000032679	Cd59a	1.62564	0.563695	1.50021	0.5579	1.02536	0.408467	0.608827	0.432722	0.654724	0.737639	1.22203	0.171047	1.26137	0.488319	1.77507	0.192613
ENSMUSG00000020828	Pld2	6.35676	4.46045	5.79673	4.69306	7.20505	4.94209	8.58642	4.03552	5.84156	3.36283	7.69638	3.30359	6.02557	5.52877	6.13716	2.91494
ENSMUSG00000063316	Rpl27	22.6522	35.4358	20.0348	35.1231	19.9741	35.6976	18.8598	30.2723	20.6208	37.1282	21.014	35.8363	18.6793	33.8044	28.1726	34.7912
ENSMUSG00000099470	Gm29340	0.723806	3.12332	1.56719	2.36422	0.540757	1.49873	0.911442	2.08163	0.709766	1.41477	0.547187	1.44633	0.381602	0.764647	0.725555	0.715905
ENSMUSG00000028777	Gnat3	0.980258	3.2686	2.84694	1.55695	1.27607	2.70074	3.47096	1.66046	0.921192	1.91604	1.8757	2.73043	1.2607	0.916081	2.14391	1.0981
ENSMUSG00000040010	Slc7a5	2.11101	4.25101	1.4546	3.29481	2.20332	3.7777	3.34513	4.51034	2.67153	3.24597	3.52889	4.87591	2.90111	7.70709	3.35757	6.91001
ENSMUSG00000069662	Marcks	29.9616	58.0182	51.3783	85.7181	37.898	75.107	50.0309	65.2343	42.5723	66.4406	38.0029	71.5343	57.4338	88.3682	42.6183	63.4451
ENSMUSG00000090862	Rps13	6.70717	11.9896	6.64217	10.1152	5.98341	12.3512	6.59522	11.161	6.76451	11.4176	7.09596	11.3306	5.90262	10.1086	8.64064	11.4044
ENSMUSG00000031617	Tmem184c	11.6188	9.66529	9.42984	7.02463	13.8721	6.16797	9.29561	7.72764	14.5781	7.6423	12.3132	6.86469	14.428	8.75748	14.2174	8.82248
ENSMUSG00000103199	Gm37648	0.425892	2.19513	0.66696	1.0748	0.361395	3.02194	0.614381	1.19034	0.62258	0.369982	0.822809	0.334594	0.573817	0.574903	0.521793	0.358837
ENSMUSG00000028127	Abcd3	4.66369	2.23262	4.0774	2.29113	4.82539	2.25037	3.77184	2.74556	3.71049	2.10651	4.03229	2.06799	4.54882	2.21929	3.74762	2.40465
ENSMUSG00000037902	Sirpa	47.5069	38.3667	33.5572	30.6662	54.8051	34.2556	36.4063	27.6318	45.806	36.3584	40.1725	30.4218	49.3049	45.223	30.4453	25.915
ENSMUSG00000023938	Aars2	2.89808	2.22756	2.96136	2.50002	3.9424	0.43131	3.83498	1.1475	3.33623	1.87642	3.34834	2.56142	2.74547	2.23438	4.13975	1.99158
ENSMUSG00000026321	Tnfrsf11a	46.1241	26.8576	33.4427	33.1858	51.9363	33.5312	40.3517	31.941	50.6828	32.9564	43.8387	29.4457	53.1225	37.7758	35.1318	22.7033
ENSMUSG00000052914	Cyp2j6	1.51396	1.59694	3.82505	2.61569	1.25257	1.52942	2.75519	2.44482	1.96021	1.41385	3.04806	1.18941	1.66583	1.63492	3.64228	0.669684
ENSMUSG00000049988	Lrrc25	4.19885	13.5889	3.62192	9.19999	4.46832	7.82286	6.18699	6.02809	4.01053	5.91992	5.98428	6.32709	6.3296	7.71924	6.89999	5.74159
ENSMUSG00000022957	Itsn1	3.60746	2.0457	3.73931	2.67432	3.92403	2.00594	4.61134	2.94273	3.34967	1.83683	4.06805	2.3559	3.26171	1.73894	3.30686	1.08308
ENSMUSG00000032750	Gab3	7.01847	4.48071	6.12465	4.54205	5.84626	2.42828	3.66365	4.08142	5.69812	3.31851	4.78596	3.12614	5.8514	2.52159	4.81692	1.89664
ENSMUSG00000107019	NoGeneName	0.290155	1.25206	0.87243	0.65902	1.10796	1.44465	0.985248	2.00038	0.872548	0.283572	1.00902	1.91482	0.762321	1.0304	0.407198	3.35536
ENSMUSG00000031925	Maml2	1.48705	1.03301	1.04794	0.639677	1.20449	0.938898	1.14759	0.545766	1.69387	0.583527	0.92786	0.384998	1.38882	0.379007	1.19703	0.192209
ENSMUSG00000001150	Mcm3ap	3.6488	2.02964	2.92849	3.38669	3.31998	1.00791	4.72591	3.22235	3.00032	2.43307	5.1305	2.57547	4.53207	2.8416	4.09577	3.24244
ENSMUSG00000103034	Gm8797	11.1384	18.9584	18.8385	20.5414	9.92417	19.8252	20.7647	14.9891	12.7933	25.3999	14.497	23.9184	13.2563	14.1102	16.6239	23.2271
ENSMUSG00000020424	Gatsl3	5.62502	6.73319	4.34414	2.82713	3.82507	6.00496	3.46298	1.65113	4.12749	3.01227	3.73736	2.54254	3.34815	3.88856	4.09379	2.92153
ENSMUSG00000039367	Sec24c	31.8625	16.8626	28.5288	20.5657	35.9377	14.409	30.5952	21.5518	31.2756	17.0894	37.2971	27.4217	35.367	29.3431	30.3261	26.3488
ENSMUSG00000030798	Cd37	36.1322	19.5845	33.4059	19.5678	36.8982	21.0269	28.8507	25.5285	34.547	22.729	29.8955	24.66	32.8196	17.9076	28.7053	15.7033
ENSMUSG00000105408	NoGeneName	0.836446	3.60938	0.589455	2.92276	1.19774	3.62138	0.626522	2.33782	1.17907	1.63494	1.91367	0.739279	2.11307	2.93132	3.56349	1.58569
ENSMUSG00000057342	Sphk2	4.58908	2.73043	3.37512	3.23836	6.67504	2.55964	4.5193	2.88203	5.15345	2.8359	5.13552	3.67562	5.33478	3.08208	4.19013	2.59295
ENSMUSG00000027955	Fam198b	0.250225	0.766042	0.463877	0.957061	0.19368	0.541672	0.648391	0.806474	0.38132	1.16986	0.70554	1.30702	0.4647	1.37778	0.684697	1.88463
ENSMUSG00000038843	Gcnt1	12.2554	7.11114	11.2725	10.2542	10.4879	7.14751	9.90424	6.33829	10.9869	6.09775	9.32287	5.88492	11.351	6.42379	8.26852	2.5171
ENSMUSG00000029998	Pcyox1	40.2643	22.2842	34.8754	29.1872	39.0792	21.6662	34.0067	27.2635	36.2205	23.3765	34.297	19.5516	40.1734	23.058	33.673	15.3532
ENSMUSG00000068923	Syt11	3.20932	1.62096	2.16382	0.549298	2.87662	1.79429	2.73214	1.07273	2.80107	1.68398	2.12988	1.6841	2.45083	1.97658	1.95644	1.7571
ENSMUSG00000041354	Rgl2	11.094	6.19566	7.34044	7.33342	11.6804	5.35396	10.1058	6.94584	10.5037	5.46181	9.76082	6.36167	11.0663	7.55628	8.77267	5.81574
ENSMUSG00000040528	Milr1	3.8572	9.78495	5.99926	6.49754	4.32313	7.43792	5.56137	5.83799	4.42892	7.74524	5.36109	5.74005	4.37659	6.54501	6.24187	4.87901
ENSMUSG00000051864	Tbc1d22a	28.9596	16.4918	19.3053	13.7483	29.6895	15.9368	19.619	18.1617	26.5439	13.5089	21.5179	16.289	27.7454	19.1657	20.2567	17.4811
ENSMUSG00000003752	Itpkc	2.15172	4.48301	4.64549	3.45802	2.27362	2.91564	5.88905	3.33597	2.51601	3.19448	5.18587	4.2584	3.13698	4.25194	4.09979	4.14138
ENSMUSG00000097471	5830432E09Rik	0.45334	1.17024	0.441179	1.06078	0.571877	1.62977	0.711468	1.90059	0.578175	1.51905	0.355603	1.77443	0.588984	1.54333	0.616734	1.62675
ENSMUSG00000029759	Pon3	19.0781	11.3748	13.8052	11.1905	16.625	9.85008	11.735	12.8538	17.9285	10.5371	12.6595	9.75532	16.3607	7.97525	11.742	6.77268
ENSMUSG00000060743	H3f3a	41.5796	76.8492	51.6324	68.0054	41.3419	76.4414	53.5439	66.8521	49.1612	77.9512	48.9788	71.1463	45.5252	71.953	59.5324	77.5745
ENSMUSG00000032470	Mras	0.39345	0.833175	0.739386	0.942006	0.63991	1.1514	0.538474	1.58841	0.684709	0.996913	0.586769	2.1294	0.618458	0.98051	0.525868	2.05808
ENSMUSG00000019951	Uhrf1bp1l	13.8858	6.43442	11.9866	8.89219	15.4292	9.99939	14.1873	9.55353	14.4106	7.79677	15.497	7.76056	15.3245	9.05558	13.165	7.54407
ENSMUSG00000032228	Tcf12	3.23145	1.50086	2.96602	1.61162	3.03127	1.37172	3.26463	1.56193	3.36195	1.73675	3.75753	1.53756	3.32444	1.42035	2.96737	1.43841
ENSMUSG00000026043	Col3a1	24.1918	4.3117	14.4185	26.2154	27.5685	13.6213	47.6029	71.9811	36.542	33.0757	28.6209	67.2958	108.098	97.1855	90.4772	87.7253
ENSMUSG00000049134	Nrap	0.670553	0.0322527	0.738418	0.0671586	0.746139	0.0369828	0.712339	0.0358119	0.678313	0	0.875527	0.0452986	0.86749	0.0518884	0.539452	0.040484
ENSMUSG00000026525	Opn3	2.15561	1.02593	2.5616	2.04922	2.23938	0	2.46941	3.24867	3.09816	1.3012	1.97269	1.41956	2.49857	1.95523	1.9066	2.524
ENSMUSG00000036553	Sh3tc1	6.82687	3.8373	5.05165	4.79691	7.1981	2.57534	6.76065	3.68858	7.21633	3.38278	6.93102	5.28065	6.90337	5.23458	5.07734	5.37284
ENSMUSG00000107304	NoGeneName	0.428694	2.08111	0.268539	0.780193	0.136415	0.928012	0.178391	0.432674	0.402863	1.29182	0.588474	0.294695	0.324896	0.567556	0.214865	0.474071
ENSMUSG00000019779	Frk	0.763088	0.199565	0.423688	0.232303	0.938176	0.0750858	0.26558	0.12926	0.880086	0.112996	0.677172	0.177126	0.899614	0.0432199	0.475185	0.0328777
ENSMUSG00000002957	Ap2a2	35.8402	52.336	64.4129	68.5827	42.5928	43.7261	63.2505	65.6984	41.9118	43.6746	84.6554	56.6022	48.6257	65.0664	75.527	52.9149
ENSMUSG00000019823	Mical1	2.36482	0.775104	1.11633	0.232282	2.60858	1.15734	1.54249	0.453285	2.06283	1.045	1.24775	0.760039	2.32104	1.65485	1.11154	2.47214
ENSMUSG00000105703	NoGeneName	27.6918	44.0761	21.4157	39.1503	34.9401	41.4905	26.3708	36.0817	28.4651	32.1425	30.4148	40.2156	29.1828	48.6124	18.7787	40.6039
ENSMUSG00000038552	Fndc4	0.320623	0.422746	1.32221	0.731335	0.340085	0.327754	1.4943	0.547631	0.351521	0.348166	1.12476	0.272882	0.395986	0.865604	1.17846	1.75592
ENSMUSG00000020372	Rack1	12.4988	24.8268	16.0068	22.8654	13.1817	24.7089	15.7188	19.8141	14.8406	23.5644	14.0526	22.0548	13.5923	20.889	17.4478	21.9895
ENSMUSG00000078566	Bnip3	22.4252	13.7669	23.2225	13.6188	18.8684	12.61	21.69	13.0185	21.2322	14.8742	20.8304	12.3008	22.1162	11.5169	21.3318	11.0749
ENSMUSG00000019790	Stxbp5	2.28027	0.777314	2.81549	1.76936	2.85208	1.71673	3.38306	1.57591	2.73742	1.44704	3.47794	1.30475	3.85366	1.82303	2.77905	1.21188
ENSMUSG00000026213	Stk11ip	3.63092	1.62204	3.29446	2.27708	3.8548	1.55637	4.28195	1.84124	3.44916	2.02132	3.98977	2.39863	4.13347	2.22123	3.67919	2.6886
ENSMUSG00000104222	Gm7292	14.2911	9.32448	17.7316	9.89711	14.4974	8.34912	16.8519	11.7743	15.404	8.41376	19.1291	9.73951	16.529	12.4222	13.9114	10.6737
ENSMUSG00000021552	Gkap1	4.55417	2.75815	5.55542	3.07102	5.18655	3.2862	4.54827	2.67971	4.0545	1.95212	4.31394	2.73049	4.19829	2.91201	5.92672	1.96905
ENSMUSG00000030447	Cyfip1	32.1975	18.9347	23.7418	19.8788	35.43	20.5705	24.7964	19.503	30.7427	19.3488	29.4349	18.9932	29.0248	22.8619	21.5539	15.6196
ENSMUSG00000034926	Dhcr24	0.511877	1.46172	0.113169	0.604979	0.20121	0.554041	0.300714	0.36468	0.226369	0.882818	0.358219	0.709669	0.334691	1.74462	0.362198	2.96824
ENSMUSG00000023022	Lima1	16.7438	8.95759	18.6338	12.657	20.0582	11.7018	18.9637	12.3793	16.6855	9.20665	19.2477	12.1569	16.9302	11.6988	15.897	8.13026
ENSMUSG00000020100	Slc29a3	5.51735	9.60918	5.00166	7.65394	5.48958	9.50446	5.59751	8.08138	5.58655	7.16742	5.22695	8.44789	5.49675	11.0203	4.70303	9.53876
ENSMUSG00000020475	Pgam2	0.577546	1.40186	0.542672	1.76584	0.96485	4.06327	0.288399	2.55583	1.35686	1.55222	0.792805	1.36121	2.62624	2.83361	2.60524	1.77918
ENSMUSG00000028980	H6pd	4.85935	1.36423	4.03782	4.75641	5.36545	2.0785	5.68333	3.56722	4.89666	2.75791	5.38997	3.11851	4.89853	4.07068	4.64808	2.67483
ENSMUSG00000059895	Ptp4a3	3.80938	2.12693	3.88952	2.14316	4.4882	1.84432	4.08956	2.64305	3.7559	1.95303	3.6739	1.49288	3.47976	1.86753	3.27308	1.32763
ENSMUSG00000034201	Gas2l1	11.1405	8.15958	11.1671	9.115	10.8815	8.06342	16.5791	9.247	12.4888	8.46081	17.52	10.5063	12.5543	9.46724	14.9203	8.07637
ENSMUSG00000015937	H2afy	11.9466	19.1933	11.6789	16.4125	11.3752	18.7012	11.726	12.9388	12.3755	18.6127	10.4816	19.6832	10.8368	24.0954	13.551	31.9854
ENSMUSG00000037656	Slc20a2	3.20251	2.07289	2.66964	1.24816	3.01018	0.568829	2.88672	1.54536	2.9478	1.28404	2.73536	2.26439	3.21953	1.81105	2.58466	1.54113
ENSMUSG00000029730	Mcm7	2.72652	4.59582	2.11356	3.95974	3.64394	3.44296	2.68895	3.75731	3.43766	5.17388	2.02731	4.37778	3.12249	7.4211	3.81497	5.71797
ENSMUSG00000078921	Tgtp2	0.11442	0.61717	0.250858	1.06617	0.0728189	1.15588	0.304723	0.639592	0.250892	1.56553	0.0698067	0.898914	0.115621	0.320786	0.229392	0.469972
ENSMUSG00000040188	Scamp2	126.319	73.9519	134.388	88.0368	145.817	75.5866	111.319	104.189	126.777	83.6122	113.567	78.0211	116.499	71.7193	101.492	60.0892
ENSMUSG00000025702	March8	4.4152	1.79856	3.94367	2.1931	4.8256	3.05303	5.00483	3.08844	4.10817	2.16935	4.99855	2.19317	5.08352	2.42767	3.83802	1.86512
ENSMUSG00000025579	Gaa	12.3718	6.19856	8.72584	8.51943	11.8895	6.25279	9.01606	8.70005	9.84587	5.72682	9.5502	6.95421	10.5558	6.76292	7.36835	4.13138
ENSMUSG00000006526	Tmem110	4.17226	2.16281	2.44384	2.03538	5.03475	2.46324	3.13867	2.22119	4.03968	2.06528	1.98349	1.78792	4.90961	2.58253	3.11413	3.133
ENSMUSG00000023140	Reg2	1.39308	3.66314	1.88163	1.90148	1.32987	3.10989	1.56518	2.10902	1.5546	3.06331	1.03583	1.64166	1.49568	2.03418	0.960055	1.65057
ENSMUSG00000022272	Myo10	1.17303	0.350601	0.639374	0.332702	1.02286	0.170387	0.583222	0.316975	1.17393	0.148886	0.724956	0.203464	0.995487	0.308465	0.493764	0.182908
ENSMUSG00000097354	2310001H17Rik	0.834619	1.15762	1.91699	1.71279	0.278231	1.30486	1.48184	1.39469	0.522886	1.04874	1.39423	1.40507	0.602414	0.792357	1.68655	0.527408
ENSMUSG00000028266	Lmo4	1.14875	1.80255	0.785009	1.9272	1.04679	2.28894	0.821336	1.37427	1.15314	1.93919	1.09906	2.55365	1.22677	2.83025	1.57027	4.04614
ENSMUSG00000014075	Tctex1d2	4.01454	6.26736	3.49612	3.67803	2.77304	5.8996	3.09664	1.6116	3.68062	6.06062	2.71807	3.61549	4.15562	5.73432	3.33717	4.42401
ENSMUSG00000096917	2500002B13Rik	0.665485	0.403827	0.664383	0.363341	0.595586	1.03543	1.41232	0.0387498	0.625386	0.48779	0.989646	0.294089	0.924647	0.388698	1.08403	0.157699
ENSMUSG00000033684	Qsox1	1.93631	1.79852	3.14003	1.58047	2.46937	1.05195	2.9791	1.99201	2.09363	1.49783	3.10612	1.83251	2.52323	1.84447	3.88947	1.78577
ENSMUSG00000072618	Gm10384	2.72683	0.447644	0.612695	1.2946	1.92404	1.47572	1.00644	1.27022	1.11414	1.27455	0.922226	0.838283	2.21634	1.49575	0.594222	1.06759
ENSMUSG00000033128	Gga1	16.03	8.71117	10.6299	10.0922	15.1501	8.22091	17.7659	9.49691	15.2144	9.14196	21.6571	15.5929	17.087	13.673	19.3947	14.5503
ENSMUSG00000049892	Rasd1	0.526997	2.27407	1.76849	0.789201	0.503088	0.24446	1.50376	2.17432	0.212247	1.39797	1.03345	1.33079	0.760756	0.562852	1.28294	1.78402
ENSMUSG00000110631	NoGeneName	1.78828	4.56507	1.86331	2.08807	2.41705	5.53846	2.9884	3.11766	1.11481	1.64389	1.57172	1.96134	1.52079	2.4489	1.66837	2.26568
ENSMUSG00000110235	NoGeneName	7.22265	7.64111	5.67183	6.15706	8.29394	12.5761	5.01794	6.24136	7.44324	7.60439	3.79981	5.59209	6.27598	4.72811	3.28778	1.32293
ENSMUSG00000074305	Peak1	6.04781	4.45423	6.46837	3.39166	4.80405	3.59624	6.27859	3.61716	5.78864	3.03557	5.15196	3.11477	6.35273	2.8678	4.22873	1.96039
ENSMUSG00000006585	Cdt1	3.60216	6.25964	5.01863	3.75127	4.37041	5.26252	5.08611	2.59549	4.33561	6.41656	5.35883	3.72217	3.55032	6.10251	5.05166	2.64069
ENSMUSG00000071644	Eef1g	9.52022	17.8449	11.7396	15.5146	9.91629	14.909	10.436	15.4302	9.50937	17.8011	9.31711	16.6947	8.91064	15.671	10.6611	17.4802
ENSMUSG00000022587	Ly6e	22.6502	44.0817	40.7095	42.7325	19.0751	39.3557	29.9655	41.7028	23.0015	37.0368	25.677	27.9348	23.6962	30.5867	29.7647	14.0021
ENSMUSG00000061119	Prcp	5.06849	7.55362	10.1478	8.66229	5.56365	10.5684	8.67561	10.4091	6.35943	7.70694	7.01445	9.30931	5.03796	9.20228	6.76971	11.2842
ENSMUSG00000029234	Tmem165	39.3309	19.5473	32.8139	26.3813	38.5576	19.5813	29.9888	20.8281	42.1528	30.6614	36.4387	28.9768	43.3595	26.002	37.8478	23.6599
ENSMUSG00000061232	H2-K1	69.6266	107.423	68.1102	86.8202	74.9468	110.76	68.9962	88.4383	68.2662	116.278	60.5174	85.2946	68.3171	95.9792	57.4455	77.515
ENSMUSG00000040322	Slc25a24	51.438	31.3211	55.0896	39.169	45.8551	20.5337	49.9821	25.9739	45.3069	34.0153	53.1941	38.7836	43.3349	38.8878	53.639	54.1989
ENSMUSG00000030431	Tmem238	2.77694	1.05255	2.18614	1.50795	2.65095	1.13728	2.47352	1.04884	2.60961	1.10024	1.92314	2.7418	2.65441	1.47291	1.95608	3.69928
ENSMUSG00000097440	Gm6277	1.11207	0.44988	1.69799	0.789314	0.663507	0.376146	1.87418	2.20161	0.914425	1.01891	1.71736	0	0.842804	0.194861	0.836065	0.263524
ENSMUSG00000045273	Cenph	1.50275	3.85022	1.35318	1.03926	1.85299	2.4398	1.37574	1.3417	0.764944	1.89702	0.343808	2.06606	0.759264	2.69171	2.51064	2.67078
ENSMUSG00000044408	Sptssa	215.162	145.527	157.773	126.783	180.002	138.402	159.074	129.575	201.445	148.797	167.263	114.3	200.876	107.024	170.459	103.744
ENSMUSG00000021823	Vcl	11.8756	5.67999	14.7982	11.0428	12.3775	6.22609	15.4276	7.71449	12.4897	9.90608	23.6674	14.7328	13.055	17.7961	15.1594	22.9749
ENSMUSG00000021668	Polk	5.57968	2.81163	6.34651	5.54764	4.7308	3.3375	7.4055	4.32621	5.95065	4.52033	8.04562	4.60707	5.74953	4.39106	6.12673	3.46209
ENSMUSG00000057469	E2f6	12.8248	4.16137	11.0148	9.05894	12.4343	5.96458	10.0564	10.268	11.3459	8.66598	11.0947	8.67836	12.8582	9.12934	10.4956	9.4971
ENSMUSG00000036503	Rnf13	22.3882	11.4785	14.4704	15.3515	19.972	12.5115	14.5596	13.2928	19.2373	12.2727	17.809	12.8114	18.459	9.9322	15.4558	10.5586
ENSMUSG00000021322	Aoah	14.7705	28.6367	20.0165	30.1676	14.4579	25.2192	16.2057	28.2971	14.9753	27.7729	19.7616	18.3378	14.5472	19.4416	16.4745	7.65101
ENSMUSG00000058600	Rpl30	8.95998	16.1015	11.0362	14.2348	7.84437	15.2505	8.92518	14.4676	8.70367	15.4036	8.43332	13.7046	8.63182	13.1024	11.8204	12.8274
ENSMUSG00000018012	Rac3	11.049	11.0956	9.425	9.38518	11.5685	9.86492	9.66172	5.69242	10.0962	8.55906	9.50567	6.06031	9.05549	5.61487	8.01332	2.2201
ENSMUSG00000034116	Vav1	32.1788	24.0857	22.1551	17.863	33.8088	24.8178	24.7517	17.653	28.4858	22.2127	24.7996	18.7099	30.2724	23.4041	22.0136	18.733
ENSMUSG00000038523	1700003F12Rik	1.16006	0.375438	0.763012	0.506696	1.49503	0.313905	0.810992	0.594424	1.25369	0.453498	0.318487	0.341768	1.05502	0.216823	0.814007	0.439837
ENSMUSG00000001119	Col6a1	1.54472	1.40604	1.15662	2.99402	1.91242	3.26555	3.49522	10.4337	3.62911	2.92499	3.66662	5.20511	6.63398	8.61642	5.54056	7.00069
ENSMUSG00000046861	Hectd3	12.1754	7.52192	8.79553	7.91646	15.7959	7.01611	11.1374	7.50913	12.1631	7.2937	12.4106	7.86502	14.9103	9.48521	10.7086	8.83237
ENSMUSG00000002147	Stat6	72.8766	39.4993	64.4817	43.6739	80.2488	41.2209	74.4452	49.0233	73.2168	40.915	81.2679	50.8129	71.6224	54.9969	61.2308	59.8302
ENSMUSG00000019558	Slc6a8	1.44261	0.787079	0.732285	0.463529	0.997256	0.604237	0.943937	0.257473	1.32972	0.734653	0.956005	0.651357	1.54712	0.501043	0.853255	0.204326
ENSMUSG00000028159	Dapp1	7.15397	9.60901	10.4979	9.73754	7.02487	8.8237	8.4995	11.1957	6.80709	9.10541	9.05321	9.80297	6.46607	11.9719	8.72353	17.8078
ENSMUSG00000004054	Map3k11	48.6287	29.1559	39.6061	34.2296	54.1291	27.2151	61.7269	39.1215	45.7885	25.5403	62.0519	40.3475	45.6569	42.5525	47.179	36.748
ENSMUSG00000040274	Cdk6	3.825	4.00086	2.86109	2.18177	3.81476	3.76235	3.30068	1.71484	4.16682	3.23667	3.40649	2.04815	3.30509	2.76886	2.60646	1.49824
ENSMUSG00000038543	BC028528	13.5138	18.61	17.1314	16.6526	12.0719	17.3236	16.173	14.8057	12.2739	21.0652	16.0979	26.4235	13.2361	18.5909	17.8602	30.1271
ENSMUSG00000021067	Sav1	2.59484	3.52501	6.14054	4.9533	2.52298	5.20107	4.84702	4.16343	2.5288	2.39508	4.00172	2.88799	2.67063	4.22122	4.91321	3.23389
ENSMUSG00000016252	Atp5e	23.2944	36.9156	21.0738	34.3918	22.2834	35.4755	20.957	33.6742	20.76	37.6766	18.4547	40.1558	18.8214	34.7679	27.6445	31.3409
ENSMUSG00000017760	Ctsa	93.1067	60.1025	86.5541	64.0709	101.894	70.0356	78.8367	68.1414	90.3504	63.5838	77.0424	52.36	89.4113	55.4492	70.6152	38.385
ENSMUSG00000097243	Gm26908	2.1486	1.35875	2.71502	1.48861	1.20238	1.28308	1.99783	1.38051	1.67101	0.144817	2.03407	0.785794	1.42248	0.276956	1.03976	0.56182
ENSMUSG00000032180	Tmed1	6.46852	3.48907	5.42086	3.68439	6.13332	4.65967	5.89269	4.29583	5.95553	3.03274	4.75968	2.8843	6.11685	3.34927	4.90692	2.31996
ENSMUSG00000004642	Slbp	7.88606	15.7994	12.242	13.0946	8.09588	15.6148	11.8242	12.3908	10.1066	14.8026	11.083	12.2067	8.4748	14.1254	13.0079	13.3581
ENSMUSG00000006589	Aprt	16.5509	25.5824	12.2725	14.904	14.709	20.4323	11.2914	12.7197	17.0111	25.1905	13.148	19.7688	15.941	19.2626	15.9158	12.8639
ENSMUSG00000090137	Uba52	2.36628	4.56229	3.05127	4.50805	2.28296	4.87718	2.99173	4.19801	2.31833	4.84662	2.44193	4.33113	2.49287	4.16395	3.17949	4.7722
ENSMUSG00000017309	Cd300lg	4.79055	5.49	4.36771	5.19072	4.30179	5.67751	5.16765	7.91968	3.70037	5.08475	4.0588	6.63376	4.00769	6.27033	4.18939	10.9411
ENSMUSG00000043716	Rpl7	20.0466	33.3173	24.315	28.8939	16.4498	30.9036	21.2455	28.642	18.9331	31.7162	20.3327	32.0591	17.1687	27.7911	23.8036	30.9323
ENSMUSG00000020392	Cdkn2aipnl	28.7861	19.5545	19.6167	18.5381	30.2937	18.2902	16.1896	15.011	27.5132	19.5395	18.1167	19.6243	27.1027	15.8379	20.6323	13.4099
ENSMUSG00000005034	Prkacb	12.3936	7.25958	12.5627	8.18543	12.1491	6.63521	11.746	8.0991	12.5696	7.66653	12.2964	6.0343	12.9498	8.0101	9.99338	6.10517
ENSMUSG00000014550	Rbsn	4.00159	2.23966	4.55845	3.25133	4.77504	2.25875	4.8451	3.47753	4.80167	2.3654	5.58163	2.45924	4.761	2.90523	3.96813	2.48788
ENSMUSG00000030986	Dhx32	3.49526	1.21231	2.67084	1.78292	4.1176	1.85134	3.00384	2.54041	3.3856	2.25308	3.16085	1.68459	3.4234	1.73746	3.07299	1.11219
ENSMUSG00000060791	Gmfg	25.765	43.0001	40.7326	49.6467	24.4434	41.73	34.4064	46.6177	25.5896	41.7938	30.1865	42.9535	24.3123	34.7353	43.5885	30.2306
ENSMUSG00000032724	Abtb2	0.476678	0.948116	0.209951	0.598589	0.298627	1.62844	0.580198	0.749411	0.475952	0.800702	0.545284	1.05326	0.331156	1.92109	1.07512	2.32975
ENSMUSG00000091971	Hspa1a	46.2738	40.8351	85.7686	58.4565	60.7202	49.9084	86.9162	65.0471	31.1928	28.7643	60.7897	56.3134	40.0678	51.4194	53.8024	70.5583
ENSMUSG00000026958	Dpp7	10.372	6.44125	9.82038	7.29015	11.1249	7.581	10.2097	7.12695	10.2512	6.21405	9.17362	5.97091	10.0492	5.16214	7.67828	3.12643
ENSMUSG00000025494	Sigirr	0.718247	0.921785	0.325803	0.50844	0.650195	0.348494	0.469966	0.876821	0.384034	0.593028	0.385312	1.34259	0.56311	1.00684	0.372405	2.51194
ENSMUSG00000036086	Zranb3	1.0806	0.203801	0.560931	0.811955	0.973867	0.0817913	0.67922	0.147843	1.01549	0.347106	0.567065	0.249344	1.04613	0.247168	0.560546	0.222046
ENSMUSG00000096727	Psmb9	3.02984	6.24173	4.06453	6.26613	3.10146	5.45251	3.35402	7.41394	3.4819	6.74273	2.78943	4.99009	3.24608	5.59472	4.17152	4.56735
ENSMUSG00000036580	Spg20	5.16067	2.43527	5.07175	3.14176	4.3496	2.41772	4.25455	3.79777	4.63256	2.65208	4.16968	2.85575	4.81969	2.30897	3.88431	1.62306
ENSMUSG00000020897	Aurkb	2.33913	3.07273	1.54002	2.69671	2.77986	4.39191	2.24075	4.29919	2.28791	3.34356	1.52902	3.41285	2.12249	5.14525	2.6957	4.22323
ENSMUSG00000015149	Sirt2	22.463	12.8467	16.2428	13.5406	21.2421	12.4841	15.6625	14.4587	20.5138	13.2339	17.0149	12.5736	19.2246	10.7609	14.681	8.04709
ENSMUSG00000031453	Rasa3	14.2354	10.7442	15.9004	8.50852	15.0446	7.78786	16.3327	12.468	11.8359	7.12031	17.4013	8.7988	13.3014	10.4544	13.0137	8.59554
ENSMUSG00000048807	Slc35e4	28.2311	19.3631	32.0365	24.0387	34.2504	22.2794	40.3429	25.5816	35.3175	22.634	42.1344	26.4282	28.9078	23.6427	34.1975	19.3795
ENSMUSG00000031652	N4bp1	1.60244	4.55745	1.94199	2.05999	2.07731	3.64625	2.38236	1.50987	2.24171	3.42581	1.99139	2.12444	2.22648	4.55215	2.4186	3.29672
ENSMUSG00000041552	Ptchd1	0.207403	0.447486	0.476372	0.805246	0.417986	1.04761	0.644418	0.450862	0.389812	1.05853	0.421785	1.54795	0.186293	0.796834	0.184804	1.83485
ENSMUSG00000095098	Ccdc85b	43.8138	32.2266	50.8989	29.2276	51.9023	35.136	42.1659	25.2336	44.1683	27.8329	38.4556	33.5609	37.2302	18.6115	48.3117	18.6885
ENSMUSG00000043613	Mmp3	0.404058	0.290594	0.18983	3.82386	0.192863	1.96803	0.739813	1.2548	1.01256	0.855596	0.616283	0.87296	1.97345	1.19575	1.75515	2.17031
ENSMUSG00000045932	Ifit2	1.58384	2.02718	2.85029	4.22112	2.81895	2.58598	1.79627	3.12623	2.95159	7.7133	1.1792	2.56244	1.38345	2.53381	1.53385	0.763362
ENSMUSG00000040913	Fbxw4	4.06043	1.85185	2.24883	1.74469	4.69557	2.3225	2.17594	2.59881	3.30389	2.62941	2.59809	2.23689	3.68607	1.7122	2.41567	1.31421
ENSMUSG00000020573	Pik3cg	15.788	8.81766	13.3016	11.3959	14.4931	8.36763	13.3155	12.8123	13.924	7.54784	15.7708	8.71664	17.3277	10.7608	13.661	7.29101
ENSMUSG00000041797	Abca9	28.2147	25.0784	42.0617	39.8362	30.3145	28.4147	54.0263	41.6282	28.6682	23.4169	53.6	27.379	32.3382	34.665	38.0498	32.1161
ENSMUSG00000004798	Ulk2	9.64793	6.17426	8.61623	6.71392	10.8433	4.1117	8.37918	6.28138	10.0714	5.10176	10.3717	6.2703	11.2999	8.26395	7.70422	6.49808
ENSMUSG00000041895	Wipi1	3.27796	1.81589	3.5129	2.46108	4.1103	1.47672	3.3268	1.83234	3.56333	2.00874	2.69171	1.73308	4.10018	2.18575	3.83649	1.49476
ENSMUSG00000010663	Fads1	26.3906	18.8915	31.0294	17.9649	29.582	18.8024	30.8076	16.4784	26.9771	17.9034	27.5233	17.99	31.7033	25.0564	21.9867	15.1354
ENSMUSG00000032044	Rpusd4	3.21195	5.55844	4.62132	9.38207	3.86472	3.9473	3.27462	4.61329	3.58437	4.25084	4.25599	7.84621	3.85423	5.12785	4.29295	4.8522
ENSMUSG00000043252	Tmem64	14.6736	9.66591	19.4735	16.1081	23.0324	12.228	20.8277	15.6305	23.6251	13.7062	21.0102	21.485	26.5848	15.8488	19.0828	25.5773
ENSMUSG00000040479	Dgkz	9.32801	5.33984	4.11377	5.23744	9.03264	5.43007	6.46096	5.0818	8.55296	4.64125	6.76411	5.37184	9.03036	5.81956	6.26296	4.40867
ENSMUSG00000016477	E2f3	1.55367	0.532086	0.880546	0.603214	1.97757	1.44141	0.960548	0.64332	1.71498	0.843565	0.744766	0.464993	1.42045	0.898826	0.865235	0.724651
ENSMUSG00000025856	Pdgfa	2.64004	2.72936	1.26985	0.919754	2.43025	1.85397	1.28692	1.77149	2.28898	1.68938	1.29429	1.0926	2.12785	1.16017	0.740368	0.357488
ENSMUSG00000066571	4931406P16Rik	2.72469	1.14011	1.57748	1.06268	3.08451	1.67415	2.4463	1.37948	2.49327	0.860728	2.58919	1.23895	2.56418	1.79013	1.69395	1.29394
ENSMUSG00000031972	Acta1	1.2352	3.87063	5.582	1.747	2.13371	11.4595	7.34284	7.2882	6.3566	8.56519	4.30621	3.95095	5.94364	4.67229	4.06832	3.62393
ENSMUSG00000037742	Eef1a1	118.73	214.914	153.524	178.411	126.025	214.488	149.751	182.627	126.01	202.502	128.878	170.813	116.12	176.88	134.99	163.529
ENSMUSG00000051444	Bbs12	0.91325	0.930466	1.0488	0.199446	1.30772	0.109831	0.988072	0.189073	1.66876	0.371888	0.998261	0.896846	1.53806	0.663802	1.16975	0.408776
ENSMUSG00000051811	Cox6b2	0.170743	0.644683	0.454561	0.522045	0.217329	0.770032	0.227363	0.291633	0.21394	0.834348	0.260424	0.838382	0.115024	1.46268	0.199682	2.1579
ENSMUSG00000032322	Pstpip1	2.67932	6.86635	5.25151	5.43307	3.12486	5.15705	3.76556	4.51797	2.62041	4.25363	4.79297	4.90045	2.90346	5.09845	4.41151	4.02207
[truncated: 10,040 more rows]
